# Supplementary material for: Allosteric mechanism for KCNE1 modulation of KCNQ1 potassium channel activation
Source: eLife. 2020 Oct 23;9:e57680. doi: 10.7554/eLife.57680 (PMC7584456; doi:10.7554/eLife.57680)
Supplement: Figure 2—figure supplement 1—source data 1. [file elife-57680-fig2-figsupp1-data1.xlsx]

## Sheet: Sheet1
	KCNQ1_WT										KCNQ1_V141C										KCNQ1_I274C
I-V curve		Control			DTT			Cu-phen				Control			DTT			Cu-phen				Control			DTT			Cu-phen
mV		Mean	SE		Mean	SE		Mean	SE			Mean	SE		Mean	SE		Mean	SE			Mean	SE		Mean	SE		Mean	SE
-80		-0.544163	0.056783		-0.930187	0.226692		-0.452633	0.045151			-0.957017	0.101466		-1.00661	0.138444		-0.80081	0.157387			-1.0467	0.137369		-0.949428	0.0846413		-0.843406	0.19903
-70		-0.423751	0.0570738		-0.678526	0.153563		-0.367508	0.0246381			-0.476645	0.0543108		-0.488151	0.0714306		-0.308894	0.0506588			-0.543403	0.131687		-0.594581	0.137329		-0.453423	0.0943729
-60		-0.3096	0.050109		-0.444601	0.135929		-0.334845	0.0542807			0.0390005	0.0741349		0.061064	0.11089		0.0132361	0.0702881			0.0034126	0.130449		-0.111787	0.288741		0.125015	0.157598
-50		-0.140197	0.0385059		-0.211234	0.0673339		-0.0839058	0.0357084			0.679151	0.231229		0.726156	0.227256		0.659926	0.146883			0.697401	0.28711		0.774147	0.418598		1.21509	0.644994
-40		0.139164	0.0718748		0.222757	0.0645014		0.186118	0.108313			1.73303	0.522799		1.73576	0.490608		1.41609	0.334347			2.07883	0.529023		2.16829	0.76626		3.00785	1.48576
-30		0.683694	0.191094		1.24802	0.268083		0.791345	0.268717			3.39608	1.0296		3.3233	0.826993		2.77942	0.678849			4.39174	1.00078		4.21719	1.33866		5.83838	2.83696
-20		1.82788	0.438732		2.88152	0.614881		2.00805	0.586319			6.17666	1.69001		5.84981	1.37709		5.17496	1.32334			7.39121	1.66209		6.82187	2.02861		9.1513	4.36239
-10		3.46046	0.803735		5.18012	1.10402		3.76	1.02093			9.77889	2.22988		9.06882	2.00608		9.02996	2.27923			10.9336	2.31691		9.64765	2.81664		12.2842	5.79965
0		5.11828	1.16464		7.24208	1.46897		5.4382	1.49442			13.5223	2.65622		12.1551	2.59513		13.6807	3.2996			14.2305	2.89299		12.3857	3.55045		14.5474	6.6513
10		6.42761	1.4278		9.24322	1.82944		6.85592	1.91453			16.7021	3.01263		14.8015	3.14301		17.9349	4.10288			17.2591	3.41133		14.8405	4.26485		16.8362	7.58888
20		7.69549	1.66769		11.5337	2.29261		8.19282	2.21107			19.8784	3.3491		17.1992	3.57602		21.665	5.08725			20.3057	3.91963		17.282	4.9312		19.0226	8.34193
30		9.00382	1.87926		13.6558	2.8177		9.63983	2.55385			22.8908	3.72796		19.4195	3.97293		25.0382	5.71138			23.392	4.48683		19.776	5.69014		20.9421	8.99515
40		10.4213	2.14274		16.0409	3.28886		10.9551	2.95071			25.893	4.09573		21.9702	4.4653		28.2312	6.37105			26.2687	5.04097		22.5983	6.5144		22.8995	9.43876
50		11.9067	2.33098		19.4359	4.17505		12.3302	3.29337			28.8562	4.44785		24.4156	4.90504		31.435	7.06856			29.1975	5.54041		25.4045	7.29955		24.9062	10.2293
60		13.5833	2.57249		22.3405	4.89934		14.108	3.70464			31.761	4.77391		27.4674	5.51823		34.8778	7.71038			32.1605	6.09864		28.2866	8.08169		27.128	10.943
Activation curve		Control			DTT			Cu-phen				Control			DTT			Cu-phen				Control			DTT			Cu-phen
mV		Mean	SE		Mean	SE		Mean	SE			Mean	SE		Mean	SE		Mean	SE			Mean	SE		Mean	SE		Mean	SE
-80		0.062498	0.019685		0.106005	0.0226042		0.0743631	0.0202489			0.169606	0.0154337		0.234128	0.0152746		0.161896	0.015102			0.20933	0.0177803		0.25387	0.0319543		0.236199	0.0335177
-70		0.0592059	0.0164545		0.125609	0.0257996		0.0737607	0.0230186			0.182767	0.0161958		0.241424	0.0133917		0.163613	0.0163068			0.214199	0.025341		0.216418	0.0545681		0.259686	0.0368379
-60		0.0617474	0.0134101		0.139502	0.0273064		0.0858041	0.0202258			0.172717	0.0184423		0.245477	0.0258683		0.168191	0.0124081			0.244172	0.0221716		0.238859	0.0985617		0.297409	0.0262812
-50		0.0861018	0.0190575		0.147908	0.032221		0.0636385	0.0284363			0.199571	0.0206323		0.271628	0.0328335		0.176893	0.0119705			0.276278	0.0267673		0.280909	0.0903683		0.364099	0.0297744
-40		0.101765	0.0141518		0.186073	0.0263189		0.106448	0.0171111			0.244436	0.0310717		0.312016	0.0551948		0.199909	0.0146238			0.33577	0.036379		0.419237	0.0364086		0.470755	0.0349226
-30		0.190686	0.0236004		0.281054	0.0346902		0.169392	0.0316835			0.315845	0.0397168		0.392389	0.064252		0.253213	0.0157042			0.483583	0.0369923		0.554119	0.0413526		0.639468	0.035289
-20		0.337245	0.0448077		0.465489	0.0497758		0.393571	0.0305986			0.443099	0.0471994		0.523415	0.0682884		0.364291	0.0230396			0.601778	0.047091		0.737098	0.0490737		0.779735	0.0334972
-10		0.544131	0.0376275		0.652294	0.0464622		0.60972	0.0262876			0.599922	0.0450544		0.677755	0.0505904		0.512218	0.0285288			0.7418	0.0371678		0.809964	0.0223467		0.894108	0.0332427
0		0.710034	0.039882		0.789643	0.041795		0.769453	0.0155403			0.729752	0.037056		0.801757	0.0380687		0.669985	0.0316015			0.828604	0.028767		0.90788	0.0411569		0.940915	0.0180031
10		0.829485	0.0199893		0.882127	0.0313221		0.835402	0.0453979			0.831704	0.027685		0.878646	0.0413137		0.784866	0.0254269			0.872544	0.036775		1.0017	0.0369626		0.970091	0.00716291
20		0.885638	0.029443		0.924379	0.0142723		0.900001	0.0433753			0.896824	0.0206803		0.939821	0.0195023		0.867549	0.0212464			0.911057	0.0247622		1.04823	0.0540024		0.973664	0.00870551
30		0.923629	0.0209329		0.939318	0.0169877		0.960764	0.013013			0.942826	0.0165521		0.949377	0.0158525		0.917945	0.0200724			0.904535	0.0527884		1.07295	0.0448322		0.959906	0.0165288
40		0.972452	0.0106998		0.963823	0.00813782		0.956811	0.0181765			0.961524	0.00956138		0.974687	0.00936503		0.957579	0.0146366			0.954959	0.0153937		1.05022	0.0288967		0.962838	0.0166236
50		0.953813	0.0117542		0.984023	0.00852704		0.965608	0.0252475			0.964877	0.0174349		0.985682	0.00626698		0.981648	0.00632398			0.967096	0.0115053		1.04141	0.0184701		0.930977	0.0305057
60		0.982977	0.0130675		0.988312	0.0116883		0.94275	0.0349286			0.993705	0.00364978		0.96359	0.0153033		0.996146	0.00385439			0.96471	0.0145146		1	0		0.923586	0.0249434
n =		9			5			5				13			7			5				12			7			7
