# Supplementary material for: Allosteric mechanism for KCNE1 modulation of KCNQ1 potassium channel activation
Source: eLife. 2020 Oct 23;9:e57680. doi: 10.7554/eLife.57680 (PMC7584456; doi:10.7554/eLife.57680)
Supplement: Figure 2—figure supplement 1—source data 2. [file elife-57680-fig2-figsupp1-data2.xlsx]

## Sheet: Sheet1
	KCNQ1_WT+KCNE1_WT										KCNQ1_V141C+KCNE1_WT										KCNQ1_I274C+KCNE1_WT
I-V curve		Control			DTT			Cu-phen				Control			DTT			Cu-phen				Control			DTT			Cu-phen
mV		Mean	SE		Mean	SE		Mean	SE			Mean	SE		Mean	SE		Mean	SE			Mean	SE		Mean	SE		Mean	SE
-80		-0.867876	0.0883138		-1.52528	0.875215		-1.87138	0.870194			-1.90477	0.735895		-0.932315	0.181127		-1.11381	0.226665			-1.70971	0.348594		-2.65552	1.33425		-0.898034	0.0987843
-70		-0.59016	0.0744644		-1.10758	0.557072		-1.45764	0.673393			-1.37778	0.563783		-0.731178	0.155254		-0.917811	0.159983			-1.12244	0.242152		-2.07823	1.18313		-0.578139	0.0599118
-60		-0.317753	0.0624615		-0.797383	0.537338		-1.05061	0.507563			-0.836833	0.438037		-0.38976	0.135182		-0.468701	0.098044			-0.654677	0.210428		-1.6042	1.14789		-0.231941	0.0795915
-50		0.0631747	0.112688		-0.538263	0.397826		-0.302076	0.345727			-0.195105	0.339191		0.0133555	0.10329		-0.205558	0.187567			0.11167	0.192372		-0.724751	0.726716		0.349071	0.134407
-40		0.718156	0.249065		-0.205811	0.484334		0.857702	0.387039			0.754067	0.280136		0.545638	0.13455		0.414841	0.278347			1.41183	0.300308		0.0693004	0.769378		1.50291	0.365577
-30		2.29835	0.675551		0.671733	0.583656		2.93893	1.27848			2.51722	0.469752		1.80174	0.287829		1.69005	0.672159			3.9877	0.804627		2.7465	0.432623		3.94775	0.871894
-20		5.83265	1.55762		3.03661	1.25858		7.73204	2.74455			6.206	1.1221		4.31866	0.642941		4.53003	1.44416			9.44768	1.86062		8.38916	1.49297		9.08812	1.93089
-10		13.9177	3.5546		8.57176	3.48291		17.4288	5.38213			13.902	2.55027		9.81947	1.38853		10.4337	2.99436			20.2225	4.00012		18.8271	3.50933		19.4978	4.12567
0		28.7943	6.95414		20.9554	8.45184		36.0518	9.87358			28.8382	5.17404		20.9051	3.00267		22.7859	6.32197			37.999	7.4728		37.1884	6.15532		36.0671	7.31255
10		53.9849	11.8326		45.3151	18.109		66.0034	16.0745			53.6584	9.49319		42.0549	5.92322		43.7347	11.7551			65.611	12.5151		64.4487	9.42464		61.9594	12.1377
20		91.8348	18.3675		82.951	32.6962		108.951	23.713			91.8465	15.6204		75.9854	10.5053		75.8362	18.6167			102.448	18.6292		100.274	13.0673		95.9373	17.938
30		142.592	26.4203		136.62	52.2432		160.711	32.153			143.837	23.3479		124.216	16.8386		119.822	27.5797			148.325	25.7748		145.486	16.9064		141.818	25.4334
40		204.255	34.9296		202.393	75.6015		222.255	41.3439			208.675	32.5332		185.365	24.6313		175.192	36.5465			201.608	33.8146		195.723	21.4703		195.758	33.9977
50		276.219	44.626		280.062	100.089		289.534	50.3788			282.062	42.9996		256.747	33.3415		238.85	46.3563			261.06	42.0856		252.799	26.34		256.317	42.4024
60		356.112	54.0666		362.215	127.854		360.088	58.8475			364.087	54.1148		334.228	42.1977		310.582	56.7894			327.294	50.6095		311.894	31.7075		321.536	51.5918
Activation curve		Control			DTT			Cu-phen				Control			DTT			Cu-phen				Control			DTT			Cu-phen
mV		Mean	SE		Mean	SE		Mean	SE			Mean	SE		Mean	SE		Mean	SE			Mean	SE		Mean	SE		Mean	SE
-80		0.00659435	0.00104943		0.000543478	0.00238988		0.00970503	0.00438711			0.00922198	0.00175025		0.00685581	0.00168743		0.00241894	0.00230029			0.00861211	0.00256298		0.00728662	0.00289524		0.0100707	0.00108094
-70		0.00669221	0.00130505		0.000690205	0.00190035		0.00851124	0.005659			0.00807044	0.00177916		0.00722734	0.00170729		0.0019727	0.00241542			0.0101959	0.00182662		0.00612674	0.00443821		0.0097869	0.00165181
-60		0.00657091	0.000922747		-0.000144997	0.00182456		0.00859011	0.00594028			0.0087221	0.00167835		0.00711075	0.00159187		0.00427044	0.00185897			0.0110929	0.00182163		0.00681001	0.0041936		0.0111841	0.00181152
-50		0.00836789	0.00152886		0.00110698	0.00198098		0.0121539	0.00483588			0.0111463	0.00184314		0.00899779	0.00143615		0.00595743	0.00242205			0.0136948	0.00208983		0.0101659	0.00388091		0.0140761	0.00205171
-40		0.011795	0.00257799		0.00186665	0.00294106		0.016537	0.00481031			0.0161099	0.00202834		0.0129738	0.00175244		0.00950745	0.00376275			0.0226099	0.00215685		0.01598	0.0047867		0.0234904	0.0025455
-30		0.0211176	0.00460953		0.00628323	0.00389446		0.0258398	0.00935547			0.025777	0.00260332		0.0196221	0.00253377		0.018149	0.00557132			0.03851	0.00355545		0.033056	0.004808		0.0408021	0.00411562
-20		0.0438377	0.0103235		0.019405	0.00522404		0.0528369	0.0132762			0.0454083	0.00389261		0.035101	0.00402136		0.0348696	0.00683842			0.0697356	0.00603306		0.0685284	0.0075999		0.0708805	0.00632615
-10		0.084297	0.0190558		0.0460109	0.00851004		0.100141	0.0203992			0.082425	0.00685576		0.0644325	0.00649624		0.0622423	0.0135152			0.123128	0.0105912		0.12919	0.015508		0.122531	0.0109337
0		0.150495	0.0273182		0.094776	0.0164802		0.17966	0.0284819			0.146973	0.0093701		0.116207	0.00902764		0.123692	0.0187641			0.196336	0.0155106		0.220222	0.0209342		0.197665	0.0147239
10		0.247109	0.033929		0.181145	0.0293422		0.284588	0.0404613			0.236779	0.0140449		0.204142	0.0127238		0.212477	0.0260037			0.298653	0.0199768		0.335426	0.0256187		0.298165	0.0202637
20		0.372849	0.0379617		0.302858	0.0387332		0.421248	0.0429343			0.361434	0.0181139		0.327215	0.0153617		0.333759	0.0301137			0.42232	0.021539		0.468553	0.0271613		0.416367	0.0213768
30		0.521044	0.0359319		0.459091	0.0394775		0.565349	0.041686			0.511676	0.017978		0.478429	0.0167546		0.477533	0.0324692			0.557554	0.0208032		0.612532	0.0206048		0.55394	0.023848
40		0.676651	0.0264222		0.634028	0.0351844		0.713221	0.0331867			0.676251	0.0156589		0.655653	0.0151827		0.64634	0.0262093			0.697691	0.0184547		0.743295	0.012935		0.702551	0.0213279
50		0.841338	0.017154		0.824595	0.0169401		0.865633	0.0207861			0.834863	0.00944972		0.829279	0.0111619		0.822997	0.0147426			0.844325	0.0116512		0.87717	0.00988342		0.849957	0.013661
60		1	0		1	0		1	0			1	0		1	0		1	0			1	0		1	0		1	0
n =		10			4			6				18			12			9				20			9			11
