# Supplementary material for: Allosteric mechanism for KCNE1 modulation of KCNQ1 potassium channel activation
Source: eLife. 2020 Oct 23;9:e57680. doi: 10.7554/eLife.57680 (PMC7584456; doi:10.7554/eLife.57680)
Supplement: Figure 2—figure supplement 1—source data 3. [file elife-57680-fig2-figsupp1-data3.xlsx]

## Sheet: Sheet1
	KCNQ1_I274C+KCNE1_L48C										KCNQ1_I274C+KCNE1_V47C										KCNQ1_V141C+KCNE1_V47C
I-V curve		Control			DTT			Cu-phen				Control			DTT			Cu-phen				Control			DTT			Cu-phen
mV		Mean	SE		Mean	SE		Mean	SE			Mean	SE		Mean	SE		Mean	SE			Mean	SE		Mean	SE		Mean	SE
-80		-3.14485	1.18751		-2.6577	1.23275		-1.6999	0.217971			-3.28615	1.61127		-3.97548	2.53899		-3.11919	1.4301			-4.25102	1.08538		-2.14379	0.686833		-7.85615	3.61419
-70		-2.13456	0.87799		-1.89466	0.920368		-0.991849	0.067274			-2.59687	1.41544		-2.85009	1.74523		-1.95363	0.756315			-1.99839	0.596661		-1.29369	0.598143		-6.32182	3.0651
-60		0.648808	0.437512		-0.00417694	0.641848		1.77519	0.645252			-1.93841	1.26596		-1.94637	1.33036		-1.538	0.750262			-4.53083e-05	1.11627		-0.352256	0.587591		-3.76651	2.49367
-50		7.23053	2.06905		4.80956	1.62724		9.34093	2.24156			-1.07396	1.1237		-1.01602	0.996923		-0.878676	0.711351			3.24134	2.16691		1.07424	0.815763		-0.136867	2.49458
-40		19.9617	5.14864		15.1226	4.68759		25.2894	5.50956			0.309058	0.942805		0.605527	0.568164		0.476372	0.458375			8.75877	3.87643		3.42244	1.41151		4.59621	3.39778
-30		40.9773	9.49714		34.2023	10.3285		53.676	10.9959			2.90597	0.90679		3.69456	0.559059		2.9904	0.465434			18.0218	6.65093		8.23233	2.82074		13.2477	5.22792
-20		71.3929	14.8122		65.6487	18.887		96.8756	18.9013			7.97761	1.14527		9.87347	1.34886		7.93034	0.9896			33.9911	11.0214		17.9432	5.33848		26.6543	8.52458
-10		110.972	20.5926		110.246	31.2311		155.625	29.296			17.6484	2.05737		22.3644	3.00176		17.617	2.27024			56.7016	16.7038		34.7553	9.81616		48.5487	13.6521
0		158.726	27.2005		166.876	47.386		226.05	41.0858			33.9535	3.69503		44.3383	5.86075		33.6981	4.57132			88.219	23.249		61.3318	16.0298		79.336	21.3542
10		211.744	34.295		232.578	67.1838		305.901	54.3013			60.2494	6.16628		76.4513	9.41823		57.8279	7.87135			128.406	30.2868		98.8264	24.7892		120.63	31.8002
20		269.516	41.6131		304.17	87.7468		392.493	69.054			97.1215	9.66595		121.817	14.434		91.9363	12.6129			173.418	37.7226		144.172	34.0219		171.067	44.5516
30		329.455	49.0092		377.075	110.639		482.179	82.3693			143.105	13.6753		176.264	20.2121		134.404	18.2181			226.62	45.4995		197.622	44.2011		228.315	58.192
40		390.44	56.389		452.726	134.606		571.643	96.205			198.749	18.107		240.756	25.7316		183.926	25.1084			283.154	53.5303		255.458	54.0129		293.34	74.0903
50		452.175	64.0751		527.976	157.981		663.637	110.746			262.043	22.54		311.818	32.3175		242.635	32.2087			342.96	61.8167		317.614	63.2769		361.651	90.9884
60		515.204	71.7494		607.122	179.902		753.171	124.874			330.597	27.4902		385.39	40.6038		304.383	40.2415			404.217	70.3357		380.111	71.6676		435.138	110.786
Activation curve		Control			DTT			Cu-phen				Control			DTT			Cu-phen				Control			DTT			Cu-phen
mV		Mean	SE		Mean	SE		Mean	SE			Mean	SE		Mean	SE		Mean	SE			Mean	SE		Mean	SE		Mean	SE
-80		0.0299828	0.00932629		0.00544107	0.0128244		0.0252181	0.00591933			0.00448916	0.0077195		0.000477179	0.00672633		-0.000973862	0.0046128			0.0702951	0.0412651		0.00994216	0.00849815		0.0354848	0.0303025
-70		0.0517208	0.0157394		0.0284856	0.0168239		0.0464618	0.00985823			0.00345917	0.00780164		0.00195049	0.00567749		0.00197014	0.0034264			0.0506046	0.0260678		0.0132327	0.00812425		0.0396372	0.0324838
-60		0.0851348	0.0239418		0.0643986	0.0257595		0.0805393	0.0157422			0.00493004	0.00791296		0.00486485	0.0054579		0.00212598	0.00460716			0.0543578	0.0253281		0.0165315	0.00890284		0.0450419	0.0335482
-50		0.137812	0.0326848		0.119054	0.0378109		0.136639	0.0232742			0.0079976	0.00841893		0.00803241	0.00450537		0.00605526	0.00485511			0.070533	0.0285304		0.0249974	0.0111282		0.0577273	0.0392204
-40		0.209981	0.041466		0.197423	0.0495725		0.214552	0.0306235			0.0155808	0.00831042		0.0172153	0.00482044		0.016728	0.00357396			0.094032	0.0367107		0.0400849	0.0143378		0.0781053	0.0438223
-30		0.296813	0.0477949		0.286337	0.0557443		0.309479	0.0371697			0.0302217	0.00880996		0.0386043	0.00615779		0.0354815	0.00173384			0.136842	0.0443976		0.0694234	0.0194635		0.111996	0.0479558
-20		0.39828	0.0507298		0.391827	0.0528435		0.420791	0.0382679			0.059713	0.00901577		0.0759772	0.0100669		0.0683881	0.00215907			0.202773	0.0552563		0.1169	0.0263151		0.160573	0.0547045
-10		0.505001	0.0489935		0.504186	0.0475661		0.52974	0.0366605			0.108847	0.0109331		0.137789	0.0154809		0.125065	0.00569038			0.282503	0.0686011		0.19016	0.03898		0.235391	0.0572506
0		0.60648	0.0457136		0.612584	0.0389125		0.633051	0.0331723			0.182273	0.0137726		0.231853	0.0222168		0.203768	0.00884295			0.383951	0.0738863		0.286721	0.0472907		0.327726	0.0585117
10		0.697378	0.0394772		0.707234	0.0282145		0.724042	0.0284428			0.286735	0.0155906		0.345085	0.0273616		0.309322	0.0133893			0.492739	0.0711765		0.405967	0.0566469		0.436865	0.0597679
20		0.780235	0.0324578		0.793034	0.0209132		0.802624	0.0232038			0.406191	0.0188668		0.48061	0.0284708		0.432079	0.0134709			0.591684	0.0642337		0.530267	0.0557993		0.554496	0.0541706
30		0.850618	0.0242742		0.854438	0.0131261		0.868826	0.0169565			0.550939	0.0185955		0.616358	0.0275271		0.571518	0.0150216			0.697367	0.052877		0.656856	0.0535646		0.670049	0.0463158
40		0.908167	0.0163249		0.899003	0.00586702		0.921307	0.010914			0.694992	0.0151391		0.751768	0.0212228		0.71196	0.0125127			0.806707	0.0361095		0.77956	0.038508		0.783051	0.0369557
50		0.956349	0.00720016		0.95172	0.00557079		0.965025	0.00569665			0.84845	0.00921527		0.885094	0.0114119		0.858368	0.00554839			0.904008	0.0217088		0.895652	0.0215159		0.891953	0.0188214
60		0.999533	0.00046729		1	0		1	0			1	0		1	0		1	0			1	0		1	0		1	0
n =		12			7			7				13			10			7				8			6			6
