# Supplementary material for: Allosteric mechanism for KCNE1 modulation of KCNQ1 potassium channel activation
Source: eLife. 2020 Oct 23;9:e57680. doi: 10.7554/eLife.57680 (PMC7584456; doi:10.7554/eLife.57680)
Supplement: Figure 2—source data 1. [file elife-57680-fig2-data1.xlsx]

## Sheet: Sheet1
	KCNQ1_I274C + KCNE1_ L45C										KCNQ1_V141C + KCNE1_ L48C
I-V curve		Control			DTT			Cu-phen				Control			DTT			Cu-phen
mV		Mean	SE		Mean	SE		Mean	SE			Mean	SE		Mean	SE		Mean	SE
-80		-1.05307	0.402894		-1.88396	0.74051		-2.12593	0.976375			-1.81405	0.43458		-2.3563	0.917401		-0.945075	0.21836
-70		-0.870551	0.290716		-1.6424	0.894228		-1.92948	0.994071			-1.30051	0.45469		-1.62747	0.69342		-0.790906	0.194565
-60		-0.461221	0.215905		-0.775361	0.684711		-1.29475	0.805667			-0.0796629	0.379193		-0.979121	0.64026		0.311206	0.211103
-50		-0.00646381	0.201374		0.0353735	0.690684		-0.739818	0.778695			2.39618	1.1269		-0.0853806	0.651941		2.71421	0.651755
-40		0.791252	0.264803		1.79869	0.853047		0.181029	0.806681			8.24283	3.03002		2.10218	1.46317		8.28544	1.72058
-30		1.9695	0.616691		5.23713	1.54852		1.87988	0.930771			20.3828	6.86421		6.91924	3.6404		19.7022	3.58917
-20		4.70584	1.35609		12.4901	3.23541		5.02606	1.6942			43.1512	13.0756		16.3386	8.28027		41.374	7.2557
-10		9.51601	2.72214		27.11	6.16808		10.6825	3.08714			80.1688	22.6822		32.9717	17.3475		76.0725	11.5842
0		17.9478	5.21597		52.71	11.1232		19.8938	5.23814			134.037	35.3802		57.4187	29.0451		124.618	16.4029
10		31.2351	8.93479		91.6629	16.8645		33.8676	8.47053			202.962	48.9426		91.2287	45.9893		186.078	21.4567
20		50.5876	14.2667		146.218	24.6312		53.2234	12.6563			283.742	62.8486		131.702	65.8555		261.742	27.1462
30		75.1334	20.6077		217.401	32.5377		77.3485	17.9828			375.349	77.4071		177.229	88.5283		343.778	33.742
40		105.471	28.662		302.806	42.1885		107.281	24.1209			468.34	90.024		223.805	111.044		433.065	39.883
50		141.106	37.3112		396.05	51.3101		140.302	30.4642			564.82	102.142		275.869	132.558		524.861	47.9965
60		181.773	46.5068		498.995	61.2732		179.011	37.0406			662.651	113.86		323.566	153.427		615.134	55.6874
Activation curve		Control			DTT			Cu-phen				Control			DTT			Cu-phen
mV		Mean	SE		Mean	SE		Mean	SE			Mean	SE		Mean	SE		Mean	SE
-80		0.0212892	0.00485963		0.00564132	0.00377842		0.00507863	0.005946			0.0090004	0.00276099		-0.00335404	0.00533295		0.00887118	0.00174705
-70		0.0217074	0.00551207		0.00597332	0.00416737		-0.00050583	0.0101111			0.013211	0.00413926		0.00125729	0.00560996		0.0134017	0.00344562
-60		0.0207901	0.00428269		0.00808121	0.00410851		0.00132981	0.00876545			0.0197509	0.00595724		0.00700019	0.00415798		0.0237746	0.00423452
-50		0.0230501	0.00378999		0.0112031	0.00415519		-0.000458419	0.0133678			0.0341306	0.00877726		0.0195872	0.00649301		0.0417719	0.00603848
-40		0.030548	0.005167		0.0184851	0.00496301		0.0130996	0.0116731			0.0594083	0.0143262		0.04295	0.00788014		0.0741935	0.00948319
-30		0.0415828	0.00563233		0.0329151	0.00767031		0.024767	0.0170403			0.102885	0.0221165		0.0838816	0.0147371		0.125786	0.0144758
-20		0.0644472	0.0088746		0.061146	0.0123615		0.0622518	0.0179673			0.170545	0.0311231		0.153323	0.022604		0.200751	0.0221889
-10		0.104931	0.0150272		0.112256	0.0197342		0.107507	0.0258596			0.259741	0.0409591		0.23799	0.0359812		0.297111	0.0296028
0		0.164864	0.0217263		0.186722	0.0272045		0.183298	0.0330799			0.36806	0.0502861		0.358335	0.0452548		0.407259	0.0318057
10		0.257965	0.027568		0.293809	0.033415		0.284018	0.036637			0.489548	0.0507839		0.477044	0.041317		0.528817	0.0313679
20		0.372289	0.0311634		0.417748	0.0361641		0.408849	0.0384545			0.611433	0.0468735		0.607178	0.0378718		0.64756	0.0258174
30		0.502902	0.035907		0.563489	0.0337392		0.553867	0.03876			0.728219	0.0391547		0.723309	0.0327659		0.756922	0.0210509
40		0.650415	0.0327183		0.711366	0.0268583		0.700133	0.0295914			0.830063	0.02809		0.818874	0.0199411		0.852168	0.0143884
50		0.813985	0.023923		0.854113	0.0153248		0.862241	0.0238323			0.919131	0.0157657		0.921659	0.0116289		0.930955	0.00891221
60		1	0		1	0		1	0			1	0		1	0		1	0
n =		6			6			5				7			5			5
