# Supplementary material for: Allosteric mechanism for KCNE1 modulation of KCNQ1 potassium channel activation
Source: eLife. 2020 Oct 23;9:e57680. doi: 10.7554/eLife.57680 (PMC7584456; doi:10.7554/eLife.57680)
Supplement: Figure 3—figure supplement 3—source data 1. [file elife-57680-fig3-figsupp3-data1.xlsx]

## Sheet: Sheet1
Rosetta fullatom score	Atom pair restraint score	Rosetta ddg binding score	Interface RMSD vs best scoring	Model description
-2876.22	166.375	-12.577	5.704	Q1_closed_10_E1_10_100_0001
-2705.96	879.611	-7.385	6.351	Q1_closed_10_E1_10_100_0002
-2785.66	299.179	-10.126	2.358	Q1_closed_10_E1_1_100_0001
-2882.47	1051.32	-6.439	5.398	Q1_closed_10_E1_1_100_0002
-2526.14	886.054	-11.921	4.938	Q1_closed_10_E1_2_100_0001
-2913.89	1625.65	-9.92	6.199	Q1_closed_10_E1_2_100_0002
-2890.01	633.711	-13.586	4.664	Q1_closed_10_E1_3_100_0001
-2893.57	2438.76	-9.99	9.336	Q1_closed_10_E1_3_100_0002
-2878.28	222.233	-11.43	2.19	Q1_closed_10_E1_4_100_0001
-2886.58	680.973	-11.349	5.07	Q1_closed_10_E1_4_100_0002
-2901.22	1770.66	-6.754	7.872	Q1_closed_10_E1_5_100_0001
-2914.57	84.99	-16.89	4.7	Q1_closed_10_E1_5_100_0002
-2883.53	255.692	-8.967	3.228	Q1_closed_10_E1_6_100_0001
-2525.67	624.946	-6.134	4.071	Q1_closed_10_E1_6_100_0002
-2907.72	684.208	-13.022	3.82	Q1_closed_10_E1_7_100_0001
-2913.3	233.815	-9.294	4.846	Q1_closed_10_E1_7_100_0002
-2899.34	876.103	-6.781	6.684	Q1_closed_10_E1_8_100_0001
-2483.27	2478.03	-3.259	8.383	Q1_closed_10_E1_8_100_0002
-2889.85	929.957	-10.198	5.252	Q1_closed_10_E1_9_100_0001
-2912.54	1344.61	-7.048	7.092	Q1_closed_10_E1_9_100_0002
-2912.88	2438.85	-3.524	6.773	Q1_closed_11_E1_10_100_0001
-2925.76	957.719	-8.764	4.635	Q1_closed_11_E1_10_100_0002
-2905.18	1341.27	-9.788	6.024	Q1_closed_11_E1_1_100_0001
-2803.58	1056.1	-10.751	4.401	Q1_closed_11_E1_1_100_0002
-2920.45	319.699	-8.264	7.606	Q1_closed_11_E1_2_100_0001
-2922.74	221.004	-7.965	6.604	Q1_closed_11_E1_2_100_0002
-2891	439.242	-8.235	5.297	Q1_closed_11_E1_3_100_0001
-2891.38	449.822	-6.011	4.196	Q1_closed_11_E1_3_100_0002
-2917.15	712.274	-16.169	5.366	Q1_closed_11_E1_4_100_0001
-2926.01	278.242	-12.5	7.277	Q1_closed_11_E1_4_100_0002
-2920.5	1718.88	-9.383	8.015	Q1_closed_11_E1_5_100_0001
-2891.53	106.38	-8.746	4.522	Q1_closed_11_E1_5_100_0002
-2818.09	326.065	-9.419	3.199	Q1_closed_11_E1_6_100_0001
-2897.37	1428.84	-5.274	6.19	Q1_closed_11_E1_6_100_0002
-2896.22	1159.18	-6.742	6.411	Q1_closed_11_E1_7_100_0001
-2901.54	1469.9	-6.418	6.287	Q1_closed_11_E1_7_100_0002
-2907.51	494.447	-5.92	5.934	Q1_closed_11_E1_8_100_0001
-2889.81	2135.64	-6.639	8.229	Q1_closed_11_E1_8_100_0002
-2913.97	509.044	-6.23	6.892	Q1_closed_11_E1_9_100_0001
-2916.44	268.972	-8.719	4.181	Q1_closed_11_E1_9_100_0002
-2930.23	1612.68	-13.495	9.925	Q1_closed_12_E1_10_100_0001
-2930.09	1828.53	-5.712	6.773	Q1_closed_12_E1_10_100_0002
-2927.95	135.441	-7.96	3.12	Q1_closed_12_E1_1_100_0001
-2936.7	158.256	-7.708	4.966	Q1_closed_12_E1_1_100_0002
-2938.81	1656.42	-5.285	6.589	Q1_closed_12_E1_2_100_0001
-2932.09	881.003	-10.77	6.189	Q1_closed_12_E1_2_100_0002
-2894.31	516.305	-5.534	4.875	Q1_closed_12_E1_3_100_0001
-2929.63	269.029	-11.886	3.91	Q1_closed_12_E1_3_100_0002
-2914.16	270.055	-6.928	3.723	Q1_closed_12_E1_4_100_0001
-2886.11	821.295	-4.614	7.528	Q1_closed_12_E1_4_100_0002
-2932.03	177.722	-5.127	3.768	Q1_closed_12_E1_5_100_0001
-2918.95	1045.32	-10.782	8.279	Q1_closed_12_E1_5_100_0002
-2946.79	89.439	-19.48	4.808	Q1_closed_12_E1_6_100_0001
-2933.4	356.609	-14.108	4.409	Q1_closed_12_E1_6_100_0002
-2933.96	397.452	-6.561	7.316	Q1_closed_12_E1_7_100_0001
-2927.7	843.349	-5.13	6.547	Q1_closed_12_E1_7_100_0002
-2926.49	188.706	-6.491	4.399	Q1_closed_12_E1_8_100_0001
-2921.24	1228.52	-5.913	5.459	Q1_closed_12_E1_8_100_0002
-2931.75	1411.41	-8.511	5.715	Q1_closed_12_E1_9_100_0001
-2948.61	213.354	-12.706	5.42	Q1_closed_12_E1_9_100_0002
-2941.95	211.135	-18.918	4.463	Q1_closed_13_E1_10_100_0001
-2939.61	885.173	-6.916	5.96	Q1_closed_13_E1_10_100_0002
-2865.23	631.07	-9.391	3.72	Q1_closed_13_E1_1_100_0001
-2927.77	734.161	-8.241	7.23	Q1_closed_13_E1_1_100_0002
-2924.18	1773.48	-7.178	8.508	Q1_closed_13_E1_2_100_0001
-2922.77	407.433	-10.097	5.292	Q1_closed_13_E1_2_100_0002
-2926.34	361.399	-12.383	4.388	Q1_closed_13_E1_3_100_0001
-2933.71	50.675	-12.548	3.515	Q1_closed_13_E1_3_100_0002
-2935.98	1699.92	-6.497	6.301	Q1_closed_13_E1_4_100_0001
-2961.94	824.667	-8.881	5.038	Q1_closed_13_E1_4_100_0002
-2938.47	354.762	-13.269	3.304	Q1_closed_13_E1_5_100_0001
-2936.06	824.342	-12.245	4.765	Q1_closed_13_E1_5_100_0002
-2944.64	320.802	-18.706	3.822	Q1_closed_13_E1_6_100_0001
-2929.45	1758.01	-3.69	8.14	Q1_closed_13_E1_6_100_0002
-2328.34	2314.21	-7.248	9.787	Q1_closed_13_E1_7_100_0001
-2960.28	1062.27	-8.478	5.914	Q1_closed_13_E1_7_100_0002
-2965.17	92.117	-15.258	4.378	Q1_closed_13_E1_8_100_0001
-2938.44	371.131	-19.212	5.15	Q1_closed_13_E1_8_100_0002
-2953.21	436.27	-13.377	5.481	Q1_closed_13_E1_9_100_0001
-2958.85	696.615	-8.185	5.734	Q1_closed_13_E1_9_100_0002
-2915.58	1229.52	-5.12	7.024	Q1_closed_14_E1_10_100_0001
-2923.51	564.934	-10.783	5.797	Q1_closed_14_E1_10_100_0002
-2930.37	1627.93	-5.573	6.569	Q1_closed_14_E1_1_100_0001
-2933.62	827.483	-8.061	5.584	Q1_closed_14_E1_1_100_0002
-2884.98	307.729	-10.936	5.063	Q1_closed_14_E1_2_100_0001
-2908.27	292.285	-4.255	4.63	Q1_closed_14_E1_2_100_0002
-2766.03	2798.41	-4.023	7.083	Q1_closed_14_E1_3_100_0001
-2922.2	658.804	-11.596	6.04	Q1_closed_14_E1_3_100_0002
-2925.55	1580.8	-13.755	8.231	Q1_closed_14_E1_4_100_0001
-2896.43	1763.42	-11.875	6.437	Q1_closed_14_E1_4_100_0002
-2724.34	544.193	-14.903	3.975	Q1_closed_14_E1_5_100_0001
-2893.68	504.677	-7.831	5.871	Q1_closed_14_E1_5_100_0002
-2923.35	1369.13	-11.537	6.692	Q1_closed_14_E1_6_100_0001
-2925.49	954.587	-9.845	6.735	Q1_closed_14_E1_6_100_0002
-2776.34	1025.26	-9.977	4.273	Q1_closed_14_E1_7_100_0001
-2885.19	921.054	-8.812	6.318	Q1_closed_14_E1_7_100_0002
-2895.99	1287.75	-11.34	5.541	Q1_closed_14_E1_8_100_0001
-2915.5	1051.62	-10.833	6.15	Q1_closed_14_E1_8_100_0002
-2918.32	1169.55	-9.787	5.974	Q1_closed_14_E1_9_100_0001
-2756.09	1557.32	-6.403	7.633	Q1_closed_14_E1_9_100_0002
-2964.56	189.025	-10.554	5.06	Q1_closed_15_E1_10_100_0001
-2963.37	2123.02	-8.526	9.492	Q1_closed_15_E1_10_100_0002
-2918.64	360.728	-6.368	4.123	Q1_closed_15_E1_1_100_0001
-2929.42	226.751	-4.913	4.461	Q1_closed_15_E1_1_100_0002
-2856.04	3718.32	-5.413	11.167	Q1_closed_15_E1_2_100_0001
-2958.24	128.709	-6.328	4.591	Q1_closed_15_E1_2_100_0002
-2935.78	616.679	-8.772	7.127	Q1_closed_15_E1_3_100_0001
-2971.09	85.818	-16.969	5.336	Q1_closed_15_E1_3_100_0002
-2970.8	400.245	-14.709	5.752	Q1_closed_15_E1_4_100_0001
-2967.44	409.775	-11.667	5.254	Q1_closed_15_E1_4_100_0002
-2927.86	1649.89	-3.369	5.85	Q1_closed_15_E1_5_100_0001
-2961.95	1026.97	-8.841	5.952	Q1_closed_15_E1_5_100_0002
-2970.81	89.962	-17.649	5.51	Q1_closed_15_E1_6_100_0001
-2936.24	2138	-11.538	5.49	Q1_closed_15_E1_6_100_0002
-2929.55	2908.66	-7.34	9.863	Q1_closed_15_E1_7_100_0001
-2935.05	1301.93	-10.703	5.498	Q1_closed_15_E1_7_100_0002
-2964.6	276.357	-10.034	5.195	Q1_closed_15_E1_8_100_0001
-2931.13	901.955	-8.189	3.907	Q1_closed_15_E1_8_100_0002
-2968.1	319.361	-15.236	5.648	Q1_closed_15_E1_9_100_0001
-2964.23	130.254	-12.533	5.039	Q1_closed_15_E1_9_100_0002
-2984.98	591.437	-9.817	5.028	Q1_closed_16_E1_10_100_0001
-3000.24	870.807	-12.704	5.461	Q1_closed_16_E1_10_100_0002
-2840.16	563.993	-1.443	7.405	Q1_closed_16_E1_1_100_0001
-3007.35	580.935	-6.061	6.987	Q1_closed_16_E1_1_100_0002
-3012.61	302.053	-16.599	5.013	Q1_closed_16_E1_2_100_0001
-3005.11	976.998	-6.882	5.059	Q1_closed_16_E1_2_100_0002
-2996.85	647.894	-9.261	6.73	Q1_closed_16_E1_3_100_0001
-2998.32	107.668	-11.327	4.336	Q1_closed_16_E1_3_100_0002
-3000.06	335.197	-13.355	3.784	Q1_closed_16_E1_4_100_0001
-2995.1	298.453	-9.278	4.181	Q1_closed_16_E1_4_100_0002
-2973.96	638.551	-6.741	7.336	Q1_closed_16_E1_5_100_0001
-2987.35	263.67	-10.405	3.581	Q1_closed_16_E1_5_100_0002
-3004.58	1212.24	-7.157	8.366	Q1_closed_16_E1_6_100_0001
-2975.36	1822.46	-3.15	8.332	Q1_closed_16_E1_6_100_0002
-2989.4	1309.48	-4.401	6.284	Q1_closed_16_E1_7_100_0001
-3013.43	269.649	-6.081	5.917	Q1_closed_16_E1_7_100_0002
-2997.41	300.791	-14.225	3.292	Q1_closed_16_E1_8_100_0001
-2984.61	323.048	-7.198	4.188	Q1_closed_16_E1_8_100_0002
-2975.09	223.606	-7.166	3.915	Q1_closed_16_E1_9_100_0001
-2989.6	715.956	-7.494	5.37	Q1_closed_16_E1_9_100_0002
-2954.43	1569.04	-11.327	6.709	Q1_closed_17_E1_10_100_0001
-2939.11	272.42	-4.946	3.98	Q1_closed_17_E1_10_100_0002
-2967.75	215.743	-9.931	4.805	Q1_closed_17_E1_1_100_0001
-3010.75	254.895	-22.998	2.382	Q1_closed_17_E1_1_100_0002
-2950.4	240.562	-17.228	2.852	Q1_closed_17_E1_2_100_0001
-2955.34	294.856	-12.477	4.905	Q1_closed_17_E1_2_100_0002
-2989.01	78.257	-15.535	5.081	Q1_closed_17_E1_3_100_0001
-2984.23	100.934	-11.596	4.648	Q1_closed_17_E1_3_100_0002
-2990.85	632.656	-20.924	6.201	Q1_closed_17_E1_4_100_0001
-2976.95	1230.72	-2.782	6.185	Q1_closed_17_E1_4_100_0002
-2950.57	2868.07	-5.644	10.381	Q1_closed_17_E1_5_100_0001
-2980.61	1216.47	-8.443	5.117	Q1_closed_17_E1_5_100_0002
-2941.57	90.906	-7.667	3.755	Q1_closed_17_E1_6_100_0001
-2956.29	203.463	-9.101	3.76	Q1_closed_17_E1_6_100_0002
-2933.23	358.994	-16.697	2.953	Q1_closed_17_E1_7_100_0001
-2952.95	1260.15	-4.453	6.297	Q1_closed_17_E1_7_100_0002
-2952.48	346.564	-8.16	3.835	Q1_closed_17_E1_8_100_0001
-2955.41	307.538	-13.639	3.417	Q1_closed_17_E1_8_100_0002
-2960.81	632.829	-15.221	4.207	Q1_closed_17_E1_9_100_0001
-2952.07	189.502	-12.024	2.92	Q1_closed_17_E1_9_100_0002
-2936.23	1412.61	-6.22	6.457	Q1_closed_18_E1_10_100_0001
-2785.7	279.942	-5.759	5.332	Q1_closed_18_E1_10_100_0002
-2870.32	341.084	-14.456	4.577	Q1_closed_18_E1_1_100_0001
-2918.22	394.007	-15.023	6.653	Q1_closed_18_E1_1_100_0002
-2900.89	784.118	-4.872	6.724	Q1_closed_18_E1_2_100_0001
-2924.77	320.105	-15.779	5.942	Q1_closed_18_E1_2_100_0002
-2896.33	107.971	-11.247	3.331	Q1_closed_18_E1_3_100_0001
-2917.37	339.455	-7.285	5.577	Q1_closed_18_E1_3_100_0002
-2923.29	361.96	-15.693	5.76	Q1_closed_18_E1_4_100_0001
-2918.65	345.063	-11.221	6.65	Q1_closed_18_E1_4_100_0002
-2904.52	1597.93	-9.03	6.595	Q1_closed_18_E1_5_100_0001
-2916.43	82.394	-9.854	5.144	Q1_closed_18_E1_5_100_0002
-2781.1	1432.06	-11.783	8.84	Q1_closed_18_E1_6_100_0001
-2926.53	771.279	-16.736	5.933	Q1_closed_18_E1_6_100_0002
-2920.55	297.817	-16.668	5.734	Q1_closed_18_E1_7_100_0001
-2925.28	1365.26	-15.184	6.493	Q1_closed_18_E1_7_100_0002
-2904.57	320.001	-10.994	3.579	Q1_closed_18_E1_8_100_0001
-2902.26	1016.33	-2.909	6.027	Q1_closed_18_E1_8_100_0002
-2929.39	121.177	-22.782	4.676	Q1_closed_18_E1_9_100_0001
-2903.27	241	-12.315	3.331	Q1_closed_18_E1_9_100_0002
-2946.42	425.634	-5.64	3.085	Q1_closed_19_E1_10_100_0001
-3018.09	125.634	-14.769	5.277	Q1_closed_19_E1_10_100_0002
-3037.52	1399.36	-6.963	5.829	Q1_closed_19_E1_1_100_0001
-3003.53	549.763	-13.764	5.115	Q1_closed_19_E1_1_100_0002
-3027.05	44.135	-21.974	4.65	Q1_closed_19_E1_2_100_0001
-2991.22	903.073	-14.078	5.321	Q1_closed_19_E1_2_100_0002
-2995.66	633.508	-5.188	6.975	Q1_closed_19_E1_3_100_0001
9165.69	312.533	6454.44	13.448	Q1_closed_19_E1_3_100_0002
-3023.72	82.248	-15.393	4.703	Q1_closed_19_E1_4_100_0001
-3031.38	47.236	-22.131	5.073	Q1_closed_19_E1_4_100_0002
-2890	402.355	-10.265	6.358	Q1_closed_19_E1_5_100_0001
-3015.8	621.363	-7.048	5.222	Q1_closed_19_E1_5_100_0002
-2986.88	378.372	-11.611	3.98	Q1_closed_19_E1_6_100_0001
-3019.41	1673.56	-12.687	8.619	Q1_closed_19_E1_6_100_0002
-2951.78	530.742	-5.44	3.183	Q1_closed_19_E1_7_100_0001
-2987.38	320.019	-12.473	3.945	Q1_closed_19_E1_7_100_0002
-2985.72	412.176	-5.431	4.962	Q1_closed_19_E1_8_100_0001
-3039.41	768.295	-13.446	4.138	Q1_closed_19_E1_8_100_0002
-3016.81	298.408	-10.787	5.974	Q1_closed_19_E1_9_100_0001
-3008.43	1169.09	-5.388	8.047	Q1_closed_19_E1_9_100_0002
-2933.36	343.442	-11.227	4.48	Q1_closed_1_E1_10_100_0001
-2961.79	155.239	-9.107	4.86	Q1_closed_1_E1_10_100_0002
-2962.36	992.695	-14.452	7.363	Q1_closed_1_E1_1_100_0001
-2951.93	1453.22	-10.035	6.18	Q1_closed_1_E1_1_100_0002
-2751.04	331.651	-9.526	6.952	Q1_closed_1_E1_2_100_0001
-2946.35	277.501	-18.125	4.82	Q1_closed_1_E1_2_100_0002
-2936.6	164.729	-9.811	4.772	Q1_closed_1_E1_3_100_0001
-2808.28	1022.04	-5.46	6.491	Q1_closed_1_E1_3_100_0002
-2861.95	118.042	-6.835	4.495	Q1_closed_1_E1_4_100_0001
-2928.04	385.695	-3.856	4.573	Q1_closed_1_E1_4_100_0002
-2967.33	2790.86	-6.432	10.059	Q1_closed_1_E1_5_100_0001
-2964	494.203	-10.71	5.82	Q1_closed_1_E1_5_100_0002
-2967.18	50.541	-16.156	4.752	Q1_closed_1_E1_6_100_0001
-2966.84	188.503	-12.522	5.071	Q1_closed_1_E1_6_100_0002
-2960.27	1760.43	-6.403	9.286	Q1_closed_1_E1_7_100_0001
-2958.7	156.548	-12.765	5.221	Q1_closed_1_E1_7_100_0002
-2885.38	1326.08	59.972	9.853	Q1_closed_1_E1_8_100_0001
-2957.34	1843.77	-4.717	6.674	Q1_closed_1_E1_8_100_0002
-2861.82	1679.8	-8.776	6.764	Q1_closed_1_E1_9_100_0001
-2939.94	379.456	-5.933	5.065	Q1_closed_1_E1_9_100_0002
-2979.24	303.84	-13.549	3.319	Q1_closed_20_E1_10_100_0001
-2976.66	165.957	-11.018	3.622	Q1_closed_20_E1_10_100_0002
-2988.74	145.135	-12.104	4.393	Q1_closed_20_E1_1_100_0001
-2984.28	5938.22	-5.855	14.239	Q1_closed_20_E1_1_100_0002
-3006.01	252.565	-12.089	5.128	Q1_closed_20_E1_2_100_0001
-2985.95	392.935	-12.969	4.575	Q1_closed_20_E1_2_100_0002
-3024.54	828.935	-17.513	7.894	Q1_closed_20_E1_3_100_0001
-2985.74	267.741	-10.362	4.218	Q1_closed_20_E1_3_100_0002
-2976.61	1104.06	-10.14	7.878	Q1_closed_20_E1_4_100_0001
-3016.86	224.47	-16.403	6.319	Q1_closed_20_E1_4_100_0002
-2979.84	328.693	-6.295	4.308	Q1_closed_20_E1_5_100_0001
-2976.59	1239.14	-5.682	4.809	Q1_closed_20_E1_5_100_0002
-2965.45	2736.1	-8.022	15.5	Q1_closed_20_E1_6_100_0001
-3003.04	86.693	-10.824	5.036	Q1_closed_20_E1_6_100_0002
-3002.35	255.788	-6.033	4.879	Q1_closed_20_E1_7_100_0001
-3009.16	241.708	-11.974	6.789	Q1_closed_20_E1_7_100_0002
-2988.99	192.042	-8.469	3.133	Q1_closed_20_E1_8_100_0001
-3000.91	780.847	-5.602	7.069	Q1_closed_20_E1_8_100_0002
-2965.24	363.47	-7.203	4.947	Q1_closed_20_E1_9_100_0001
-3006.92	135.239	-11.154	5.176	Q1_closed_20_E1_9_100_0002
-2967.77	2313.09	-6.685	8.516	Q1_closed_2_E1_10_100_0001
-2968.89	1640.4	-7.647	9.95	Q1_closed_2_E1_10_100_0002
-2947.53	710.199	-5.473	4.716	Q1_closed_2_E1_1_100_0001
-2943.2	455.141	-7.983	4.238	Q1_closed_2_E1_1_100_0002
-2882.41	347.004	-9.627	4.678	Q1_closed_2_E1_2_100_0001
-2979.04	72.859	-16.599	5.422	Q1_closed_2_E1_2_100_0002
-2963.28	1441.55	-9.39	8.517	Q1_closed_2_E1_3_100_0001
-2936.73	1223.53	-7.727	6.011	Q1_closed_2_E1_3_100_0002
-2975.88	199.551	-14.029	5.244	Q1_closed_2_E1_4_100_0001
-2940.64	161.723	-7.142	4.627	Q1_closed_2_E1_4_100_0002
-2960.08	404.744	-8.89	5.543	Q1_closed_2_E1_5_100_0001
-2977.27	864.027	-17.507	6.44	Q1_closed_2_E1_5_100_0002
-2973.98	744.69	-7.431	6.92	Q1_closed_2_E1_6_100_0001
-2945.72	542.531	-10.41	9.322	Q1_closed_2_E1_6_100_0002
-2948.21	240.489	-14.561	3.876	Q1_closed_2_E1_7_100_0001
-2944.67	1286	-3.682	6.573	Q1_closed_2_E1_7_100_0002
-2918.7	451.516	-8.485	3.294	Q1_closed_2_E1_8_100_0001
-2977.62	1327.47	-15.273	6.775	Q1_closed_2_E1_8_100_0002
-2948.43	276.217	-15.769	3.028	Q1_closed_2_E1_9_100_0001
-2898.04	912.818	-9.629	4.515	Q1_closed_2_E1_9_100_0002
-2975.52	2498.99	-17.166	9.878	Q1_closed_3_E1_10_100_0001
-2949.3	244.067	-11.755	3.145	Q1_closed_3_E1_10_100_0002
-2966.16	90.404	-9.308	3.46	Q1_closed_3_E1_1_100_0001
-2981.07	683.357	-14.723	6.316	Q1_closed_3_E1_1_100_0002
-2969.23	1145.56	-11.967	6.562	Q1_closed_3_E1_2_100_0001
-2987.02	1379.2	-5.411	5.933	Q1_closed_3_E1_2_100_0002
-2986.57	135.983	-12.125	5.577	Q1_closed_3_E1_3_100_0001
-2972.05	732.608	-12.223	8.967	Q1_closed_3_E1_3_100_0002
-2893.67	142.87	-8.923	5.078	Q1_closed_3_E1_4_100_0001
-2992.82	75.927	-15.691	5.399	Q1_closed_3_E1_4_100_0002
-2943.57	275.383	-16.171	3.626	Q1_closed_3_E1_5_100_0001
-2984.95	1543.53	-13.028	7.276	Q1_closed_3_E1_5_100_0002
-2985.8	164.392	-12.112	5.278	Q1_closed_3_E1_6_100_0001
-2953.23	1026.05	-3.107	6.503	Q1_closed_3_E1_6_100_0002
-2948.32	229.211	-7.516	5.394	Q1_closed_3_E1_7_100_0001
-2989.34	115.758	-10.887	5.088	Q1_closed_3_E1_7_100_0002
-2950.71	206.102	-6.372	4.925	Q1_closed_3_E1_8_100_0001
-2988.14	194.805	-9.994	5.969	Q1_closed_3_E1_8_100_0002
-2957.72	237.54	-12.876	3.298	Q1_closed_3_E1_9_100_0001
-2972.45	261.319	-7.015	4.155	Q1_closed_3_E1_9_100_0002
-2950.07	1085.57	-10.991	6.833	Q1_closed_4_E1_10_100_0001
-2925.8	840.66	-6.041	4.679	Q1_closed_4_E1_10_100_0002
-2866.3	346.591	-8.323	3.753	Q1_closed_4_E1_1_100_0001
-2920.99	452.246	-11.067	4.336	Q1_closed_4_E1_1_100_0002
-2789.7	386.427	-5.371	3.198	Q1_closed_4_E1_2_100_0001
-2950.5	179.698	-8.521	4.698	Q1_closed_4_E1_2_100_0002
-2925.78	156.993	-7.706	3.986	Q1_closed_4_E1_3_100_0001
-2927.22	891.077	-6.227	4.67	Q1_closed_4_E1_3_100_0002
-2905.93	289.714	-9.556	3.474	Q1_closed_4_E1_4_100_0001
-2948.57	603.342	-9.071	5.427	Q1_closed_4_E1_4_100_0002
-2946.54	2381.9	-4.544	8.012	Q1_closed_4_E1_5_100_0001
-2929.45	397.361	-6.302	5.076	Q1_closed_4_E1_5_100_0002
-2587.53	708.723	-8.769	3.134	Q1_closed_4_E1_6_100_0001
-2860.48	731.958	-9.009	7	Q1_closed_4_E1_6_100_0002
-2951.01	74.636	-16.5	4.759	Q1_closed_4_E1_7_100_0001
-2949.93	420.939	-8.803	5.814	Q1_closed_4_E1_7_100_0002
-2946.71	142.625	-13.579	5.018	Q1_closed_4_E1_8_100_0001
-2948.1	349.779	-7.473	5.304	Q1_closed_4_E1_8_100_0002
-2967.63	84.825	-24.269	4.636	Q1_closed_4_E1_9_100_0001
-2949.49	242.909	-6.025	4.323	Q1_closed_4_E1_9_100_0002
-2965.22	419.204	-8.338	4.758	Q1_closed_5_E1_10_100_0001
-2977.32	130.689	-9.1	5.293	Q1_closed_5_E1_10_100_0002
-2945.42	316.553	-9.627	2.524	Q1_closed_5_E1_1_100_0001
-2991.3	307.575	-14.529	5.982	Q1_closed_5_E1_1_100_0002
-2990.6	301.265	-11.954	5.885	Q1_closed_5_E1_2_100_0001
-2970.64	621.329	-16.183	4.982	Q1_closed_5_E1_2_100_0002
-2631.11	945.986	-10.689	4.359	Q1_closed_5_E1_3_100_0001
-2904.43	1499.69	-6.824	18.25	Q1_closed_5_E1_3_100_0002
-2981.04	1031.75	-13.321	6.439	Q1_closed_5_E1_4_100_0001
-2976.44	1365.39	-4.129	5.572	Q1_closed_5_E1_4_100_0002
-2965.32	1295.11	-8.448	7.553	Q1_closed_5_E1_5_100_0001
-2983.01	175.168	-7.286	4.508	Q1_closed_5_E1_5_100_0002
-2948.24	378.645	-8.799	6.115	Q1_closed_5_E1_6_100_0001
-2956.54	1452.16	-10.449	8.822	Q1_closed_5_E1_6_100_0002
-2982.77	1186.36	-8.328	8.747	Q1_closed_5_E1_7_100_0001
-2966.69	285.344	-8.217	3.276	Q1_closed_5_E1_7_100_0002
-2983.07	988.271	-9.359	7.305	Q1_closed_5_E1_8_100_0001
-2976.57	1696.74	-8.84	5.89	Q1_closed_5_E1_8_100_0002
-2948.04	336.657	-9.965	5.449	Q1_closed_5_E1_9_100_0001
-2959.97	2171.64	0.089	8.302	Q1_closed_5_E1_9_100_0002
-2925.09	1620.64	-3.983	6.226	Q1_closed_6_E1_10_100_0001
-2921.15	819.855	-7.156	5.917	Q1_closed_6_E1_10_100_0002
-2905.84	298.611	-16.355	5.168	Q1_closed_6_E1_1_100_0001
-2928.05	1482.45	-6.492	7.415	Q1_closed_6_E1_1_100_0002
-2921.06	613.81	-8.245	5.096	Q1_closed_6_E1_2_100_0001
-2910.47	931.976	-16.86	5.615	Q1_closed_6_E1_2_100_0002
-2880.58	1624.97	-3.64	6.062	Q1_closed_6_E1_3_100_0001
-2940.36	115.857	-16.812	5.412	Q1_closed_6_E1_3_100_0002
-2887.71	341.186	-6.141	5.12	Q1_closed_6_E1_4_100_0001
-2886.24	866.055	-11.005	4.472	Q1_closed_6_E1_4_100_0002
-2892.6	1490.69	-5.111	6.389	Q1_closed_6_E1_5_100_0001
-2925.2	169.426	-6.258	4.839	Q1_closed_6_E1_5_100_0002
-2900.07	717.557	-6.581	6.732	Q1_closed_6_E1_6_100_0001
-2903.51	305.583	-9.461	3.297	Q1_closed_6_E1_6_100_0002
-2893.65	76.905	-11.143	2.059	Q1_closed_6_E1_7_100_0001
-2912.6	252.396	-23.722	3.881	Q1_closed_6_E1_7_100_0002
-2899.4	631.176	-7.592	4.619	Q1_closed_6_E1_8_100_0001
-2900.78	243.079	-9.083	3.337	Q1_closed_6_E1_8_100_0002
-2904.61	252.509	-12.156	3.425	Q1_closed_6_E1_9_100_0001
-2747.61	717.326	-11.871	4.54	Q1_closed_6_E1_9_100_0002
-2916.76	261.495	-11.503	3.512	Q1_closed_7_E1_10_100_0001
-2921.42	449.221	-8.862	4.014	Q1_closed_7_E1_10_100_0002
-2929.34	1345.57	-3.964	7.259	Q1_closed_7_E1_1_100_0001
-2924.18	329.506	-12.605	4.73	Q1_closed_7_E1_1_100_0002
-2917.35	297.059	-1.414	3.676	Q1_closed_7_E1_2_100_0001
-2947.95	1317.36	-6.212	6.188	Q1_closed_7_E1_2_100_0002
-2924.63	29.139	-15.683	2.668	Q1_closed_7_E1_3_100_0001
-2943.53	456.664	-15.37	6.248	Q1_closed_7_E1_3_100_0002
-2939.41	1754.55	-10.104	7.846	Q1_closed_7_E1_4_100_0001
-2945.92	160.554	-13.374	5.536	Q1_closed_7_E1_4_100_0002
-2942.05	402.894	-10.474	4.769	Q1_closed_7_E1_5_100_0001
-2924.22	672.807	-8.824	4.027	Q1_closed_7_E1_5_100_0002
-2680.9	721.2	-11.646	5.206	Q1_closed_7_E1_6_100_0001
-2933.49	66.6	-11.922	5.359	Q1_closed_7_E1_6_100_0002
-1932.85	462.764	-10.537	6.435	Q1_closed_7_E1_7_100_0001
-2924.15	134.449	-19.872	5.347	Q1_closed_7_E1_7_100_0002
-2946.45	621.716	-10.858	5.342	Q1_closed_7_E1_8_100_0001
-2951.2	316.088	-23.064	6.973	Q1_closed_7_E1_8_100_0002
-2920.22	268.806	-9.624	3.475	Q1_closed_7_E1_9_100_0001
-2919.32	1884.89	-5.804	6.27	Q1_closed_7_E1_9_100_0002
-2954.95	311.457	-7.162	6.017	Q1_closed_8_E1_10_100_0001
-2946.51	597.428	-6.046	5.823	Q1_closed_8_E1_10_100_0002
-2964.73	84.018	-15.491	4.809	Q1_closed_8_E1_1_100_0001
-2958.95	128.733	-8.616	6.073	Q1_closed_8_E1_1_100_0002
-2861.95	1222.6	-7.421	10.253	Q1_closed_8_E1_2_100_0001
-2930.11	189.066	-7.334	3.523	Q1_closed_8_E1_2_100_0002
-2953.53	2457.64	-9.501	8.725	Q1_closed_8_E1_3_100_0001
-2909.75	1248.76	-1.002	5.265	Q1_closed_8_E1_3_100_0002
-2957	89.508	-15.999	5.455	Q1_closed_8_E1_4_100_0001
-2946.08	494.302	-9.709	4.254	Q1_closed_8_E1_4_100_0002
-2936.9	1136.17	-5.944	4.911	Q1_closed_8_E1_5_100_0001
-2957.23	257.428	-9.489	4.94	Q1_closed_8_E1_5_100_0002
-2961.53	1202.21	-10.391	8.074	Q1_closed_8_E1_6_100_0001
-2953.38	251.805	-15.842	3.474	Q1_closed_8_E1_6_100_0002
-2930.3	976.796	-3.85	4.953	Q1_closed_8_E1_7_100_0001
-2935.89	1488.51	-5.251	5.705	Q1_closed_8_E1_7_100_0002
-2939.85	356.492	-16.796	3.503	Q1_closed_8_E1_8_100_0001
-2924.14	1400.94	-5.684	7.303	Q1_closed_8_E1_8_100_0002
-2933.65	890.022	-7.01	6.733	Q1_closed_8_E1_9_100_0001
-2957.64	188.988	-9.286	4.846	Q1_closed_8_E1_9_100_0002
-2938.06	332.697	-11.935	6.978	Q1_closed_9_E1_10_100_0001
-2941.13	205.345	-8.476	6.136	Q1_closed_9_E1_10_100_0002
-2956.95	700.168	-10.585	3.795	Q1_closed_9_E1_1_100_0001
-2933.1	1294.11	-2.098	7.353	Q1_closed_9_E1_1_100_0002
-2943.52	199.593	-11.156	2.941	Q1_closed_9_E1_2_100_0001
-2945.34	234.906	-11.348	5.261	Q1_closed_9_E1_2_100_0002
-2945.5	365.137	-7.72	3.27	Q1_closed_9_E1_3_100_0001
-2954.2	113.432	-13.067	5.471	Q1_closed_9_E1_3_100_0002
-2914.81	3210.98	-10.27	14.38	Q1_closed_9_E1_4_100_0001
-2952.16	985.312	-17.485	6.419	Q1_closed_9_E1_4_100_0002
-2905.4	784.366	-6.503	5.213	Q1_closed_9_E1_5_100_0001
-2884.69	655.06	-13.399	3.366	Q1_closed_9_E1_5_100_0002
-2943.77	968.458	-10.438	6.513	Q1_closed_9_E1_6_100_0001
-2956.27	92.407	-19.032	5.277	Q1_closed_9_E1_6_100_0002
-2900.24	903.684	-10.528	10.215	Q1_closed_9_E1_7_100_0001
-2937.76	325.792	-11.861	6.968	Q1_closed_9_E1_7_100_0002
-2946.48	300.865	-11.726	5.382	Q1_closed_9_E1_8_100_0001
-2948.73	227.851	-13.41	5.445	Q1_closed_9_E1_8_100_0002
-2946.73	1322.73	-8.694	7.96	Q1_closed_9_E1_9_100_0001
-2920.51	228.879	-13.094	3.027	Q1_closed_9_E1_9_100_0002
-2913.43	1539.62	-4.476	6.642	Q1_closed_10_E1_10_10_0001
-2906.59	1414.45	-7.409	5.971	Q1_closed_10_E1_10_10_0002
-2851.21	360.839	-11.14	7.488	Q1_closed_10_E1_1_10_0001
-2892.71	834.141	-7.78	5.323	Q1_closed_10_E1_1_10_0002
-2885.34	439.454	-11.782	5.642	Q1_closed_10_E1_2_10_0001
-2925.55	352.469	-13.955	6.683	Q1_closed_10_E1_2_10_0002
-2876.08	109.045	-14.623	2.876	Q1_closed_10_E1_3_10_0001
-2914.77	189.7	-11.243	4.961	Q1_closed_10_E1_3_10_0002
-2880.48	1389.75	-5.24	5.543	Q1_closed_10_E1_4_10_0001
-2920.71	1062.93	-9.694	7.032	Q1_closed_10_E1_4_10_0002
-2870.7	1841.51	-4.874	6.661	Q1_closed_10_E1_5_10_0001
-2904.79	193.706	-12.932	5.82	Q1_closed_10_E1_5_10_0002
-2905.17	787.072	-12.656	4.092	Q1_closed_10_E1_6_10_0001
-2879.29	918.658	-15.89	7.726	Q1_closed_10_E1_6_10_0002
-2872.17	799.839	-9.254	3.477	Q1_closed_10_E1_7_10_0001
-2880.36	181.69	-9.411	3.329	Q1_closed_10_E1_7_10_0002
-2913.78	152.619	-12.263	4.751	Q1_closed_10_E1_8_10_0001
-2882.18	225.327	-5.732	4.333	Q1_closed_10_E1_8_10_0002
-2910.62	228.838	-12.187	5.576	Q1_closed_10_E1_9_10_0001
-2885.07	1215.31	-7.101	4.95	Q1_closed_10_E1_9_10_0002
-2903.67	417.323	-7.64	5.113	Q1_closed_11_E1_10_10_0001
-2918.82	242.904	-8.998	5.976	Q1_closed_11_E1_10_10_0002
-2918.7	1515.67	-6.139	7.128	Q1_closed_11_E1_1_10_0001
-2920.7	1457.79	-8.998	6.192	Q1_closed_11_E1_1_10_0002
-2890.91	359.144	-17.098	3.886	Q1_closed_11_E1_2_10_0001
-2924.96	112.868	-10.46	5.412	Q1_closed_11_E1_2_10_0002
-2895.5	495.541	-7.372	3.375	Q1_closed_11_E1_3_10_0001
-2931.74	1431.58	-7.712	6.495	Q1_closed_11_E1_3_10_0002
-2935.41	54.896	-21.579	4.75	Q1_closed_11_E1_4_10_0001
-2909.65	345.317	-14.922	4.244	Q1_closed_11_E1_4_10_0002
-2930.77	364.262	-18.256	6.688	Q1_closed_11_E1_5_10_0001
-2919.55	1111.48	-6.552	5.474	Q1_closed_11_E1_5_10_0002
-2903.45	1130.75	-6.347	6.84	Q1_closed_11_E1_6_10_0001
-2936.69	59.146	-19.595	5.255	Q1_closed_11_E1_6_10_0002
-2898.65	1432.59	-4.843	6.441	Q1_closed_11_E1_7_10_0001
-2921.69	629.58	-10.423	5.588	Q1_closed_11_E1_7_10_0002
-2916.78	1427.96	-12.315	7.181	Q1_closed_11_E1_8_10_0001
-2904.8	1279.53	-8.514	6.69	Q1_closed_11_E1_8_10_0002
-2907.59	332.226	-13.31	3.517	Q1_closed_11_E1_9_10_0001
-2893.18	226.868	-9.717	5.533	Q1_closed_11_E1_9_10_0002
-2930.98	315.096	-12.683	3.957	Q1_closed_12_E1_10_10_0001
-2927.98	310.04	-12.779	3.603	Q1_closed_12_E1_10_10_0002
-2903.49	602.728	-10.529	3.605	Q1_closed_12_E1_1_10_0001
-2927.74	320.12	-12.854	4.898	Q1_closed_12_E1_1_10_0002
-2638.12	717.772	-5.606	7.389	Q1_closed_12_E1_2_10_0001
-2933.27	363.157	-16.523	3.953	Q1_closed_12_E1_2_10_0002
-2941.64	662.796	-10.232	6.678	Q1_closed_12_E1_3_10_0001
-2926.06	733.101	-3.755	6.043	Q1_closed_12_E1_3_10_0002
-2943.24	61.137	-17.014	4.975	Q1_closed_12_E1_4_10_0001
-2885.31	729.004	-9.75	3.078	Q1_closed_12_E1_4_10_0002
-2922.38	1100.27	-14.948	10.339	Q1_closed_12_E1_5_10_0001
-2926.77	522.931	-8.964	3.743	Q1_closed_12_E1_5_10_0002
-2933.58	181.579	-5.942	5.59	Q1_closed_12_E1_6_10_0001
-2941.52	299.671	-11.599	5.02	Q1_closed_12_E1_6_10_0002
-2918.66	689.373	-8.721	4.278	Q1_closed_12_E1_7_10_0001
-2937.66	805.079	-8.568	6.387	Q1_closed_12_E1_7_10_0002
-2932.59	311.392	-9.994	5.864	Q1_closed_12_E1_8_10_0001
-2936.37	271.928	-8.251	3.72	Q1_closed_12_E1_8_10_0002
-2931.82	351.399	-7.694	6.229	Q1_closed_12_E1_9_10_0001
-2922.19	1595.49	-4.573	6.523	Q1_closed_12_E1_9_10_0002
-2932.33	914.003	-4.582	6.695	Q1_closed_13_E1_10_10_0001
-2952.86	300.504	-10.707	5.821	Q1_closed_13_E1_10_10_0002
-2964.81	1043.3	-4.321	5.85	Q1_closed_13_E1_1_10_0001
-2960.43	1236.46	-7.642	6.014	Q1_closed_13_E1_1_10_0002
-2958.79	891.912	-7.189	7.38	Q1_closed_13_E1_2_10_0001
-2949.66	683.528	-8.383	8.053	Q1_closed_13_E1_2_10_0002
-2957	810.886	-4.626	6.47	Q1_closed_13_E1_3_10_0001
-2936.74	512.555	-12.98	5.244	Q1_closed_13_E1_3_10_0002
-2889.82	1136.32	-6.106	8.876	Q1_closed_13_E1_4_10_0001
-2953.25	230.352	-6.471	5.168	Q1_closed_13_E1_4_10_0002
-2886.82	380.919	-8.36	3.917	Q1_closed_13_E1_5_10_0001
-2934.87	387.359	-6.366	5.097	Q1_closed_13_E1_5_10_0002
-2953.5	958.846	-7.778	7.505	Q1_closed_13_E1_6_10_0001
-2922.15	2028.89	-5.014	7.623	Q1_closed_13_E1_6_10_0002
-2962.03	1151.3	-12.132	5.187	Q1_closed_13_E1_7_10_0001
-2852.55	614.864	-9.917	4.188	Q1_closed_13_E1_7_10_0002
-2933.19	1611.64	-4.468	5.665	Q1_closed_13_E1_8_10_0001
-2957.3	1600.52	-7.184	7.171	Q1_closed_13_E1_8_10_0002
-2973.13	848.13	-12.426	4.314	Q1_closed_13_E1_9_10_0002
-2907.95	560.273	-6.972	5.448	Q1_closed_14_E1_10_10_0001
-2922.05	521.161	-13.696	5.773	Q1_closed_14_E1_10_10_0002
-2946.78	299.872	-12.047	3.724	Q1_closed_14_E1_1_10_0001
-2896.96	1175.63	-5.73	6.339	Q1_closed_14_E1_1_10_0002
-2924.49	170.213	-12.135	4.644	Q1_closed_14_E1_2_10_0001
-2912.39	159.93	-11.875	4.533	Q1_closed_14_E1_2_10_0002
-2933.11	311.825	-12.153	4.35	Q1_closed_14_E1_3_10_0001
-2898.49	261.511	-9.045	3.147	Q1_closed_14_E1_3_10_0002
-2674.39	1432.07	-12.604	10.291	Q1_closed_14_E1_4_10_0001
-2894.58	1058.28	-9.156	4.826	Q1_closed_14_E1_4_10_0002
-2898.19	1050.18	-10.858	4.903	Q1_closed_14_E1_5_10_0001
-2924.52	900.893	-3.166	5.541	Q1_closed_14_E1_5_10_0002
-2892.87	548.891	-8.693	4.024	Q1_closed_14_E1_6_10_0001
-2932.55	51.807	-22.001	4.862	Q1_closed_14_E1_6_10_0002
-2681.34	452.528	-7.73	3.788	Q1_closed_14_E1_7_10_0001
-2895.52	371.315	-10.115	3.542	Q1_closed_14_E1_7_10_0002
-2895.13	287.137	-8.412	3.43	Q1_closed_14_E1_8_10_0001
-2918.78	6460.4	-1.339	11.526	Q1_closed_14_E1_8_10_0002
-2946.06	335.47	-13.994	4.182	Q1_closed_14_E1_9_10_0001
-2932.25	383.761	-13.744	7.095	Q1_closed_14_E1_9_10_0002
-2959.84	696.761	-12.537	7.255	Q1_closed_15_E1_10_10_0001
-2937.18	914.569	-7.508	4.585	Q1_closed_15_E1_10_10_0002
-2962.93	879.188	-9.104	8.029	Q1_closed_15_E1_1_10_0001
-2936.5	1372.49	-7.641	7.108	Q1_closed_15_E1_1_10_0002
-2941.7	222.06	-13.085	4.613	Q1_closed_15_E1_2_10_0001
-2938.69	747.513	-6.939	4.888	Q1_closed_15_E1_2_10_0002
-2942.86	244.46	-10.275	3.337	Q1_closed_15_E1_3_10_0001
-2937.62	117.924	-10.051	2.761	Q1_closed_15_E1_3_10_0002
-2973.89	198.534	-17.643	6.664	Q1_closed_15_E1_4_10_0001
-2968.64	79.657	-12.72	3.062	Q1_closed_15_E1_4_10_0002
-2968.2	235.406	-10.595	5.404	Q1_closed_15_E1_5_10_0001
-2959.62	4904.16	-7.648	11.572	Q1_closed_15_E1_5_10_0002
-2972.03	51.162	-15.101	4.637	Q1_closed_15_E1_6_10_0001
-2935.72	327.023	-14.875	3.957	Q1_closed_15_E1_6_10_0002
-2927.9	318.729	-9.246	3.405	Q1_closed_15_E1_7_10_0001
-2971.9	143.323	-19.485	5.619	Q1_closed_15_E1_7_10_0002
-2949.16	1684.3	-9.164	6.155	Q1_closed_15_E1_8_10_0001
-2967.2	209.395	-12.1	5.301	Q1_closed_15_E1_8_10_0002
-2970.9	88.721	-24.315	4.519	Q1_closed_15_E1_9_10_0001
-2926.17	695.175	-3.276	4.634	Q1_closed_15_E1_9_10_0002
-3022.74	1131.81	-20.515	6.363	Q1_closed_16_E1_10_10_0001
-3006.03	92.696	-8.186	5.378	Q1_closed_16_E1_10_10_0002
-3011.59	2698.06	-8.279	10.139	Q1_closed_16_E1_1_10_0001
-2991.47	3727.94	-5.074	8.301	Q1_closed_16_E1_1_10_0002
-3004.09	742.063	-7.808	5.739	Q1_closed_16_E1_2_10_0001
-3020.92	1283.94	-13.368	5.145	Q1_closed_16_E1_2_10_0002
-3006.95	126.98	-11.696	3.481	Q1_closed_16_E1_3_10_0001
-3006.2	304.764	-11.771	5.511	Q1_closed_16_E1_3_10_0002
-3022.85	1012.82	-21.743	6.207	Q1_closed_16_E1_4_10_0001
-2979.23	333.442	-6.332	3.947	Q1_closed_16_E1_4_10_0002
-3036.48	121.431	-25.824	2.25	Q1_closed_16_E1_5_10_0001
-3011.03	211.579	-11.589	5.007	Q1_closed_16_E1_5_10_0002
-2989.7	896.804	-10.218	5.686	Q1_closed_16_E1_6_10_0001
-3018.68	717.665	-14.984	6.03	Q1_closed_16_E1_6_10_0002
-3005.44	1638.94	-6.41	7.853	Q1_closed_16_E1_7_10_0001
-3005.39	78.702	-10.862	3.778	Q1_closed_16_E1_7_10_0002
-3015.86	71.421	-17.35	4.829	Q1_closed_16_E1_8_10_0001
-3009.81	361.052	-12.185	5.347	Q1_closed_16_E1_8_10_0002
-3003.76	1110.76	-2.559	7.416	Q1_closed_16_E1_9_10_0001
-3030.32	1128.03	-5.286	4.582	Q1_closed_16_E1_9_10_0002
-2980.16	284.432	-9.304	4.636	Q1_closed_17_E1_10_10_0001
-2979	81.516	-9.98	4.759	Q1_closed_17_E1_10_10_0002
-2945.41	70.757	-11.433	4.098	Q1_closed_17_E1_1_10_0001
-2957.2	380.85	-10.744	4.439	Q1_closed_17_E1_1_10_0002
-2968.04	698.449	-6.376	7.568	Q1_closed_17_E1_2_10_0001
-3002.16	868.277	-16.188	8.086	Q1_closed_17_E1_2_10_0002
-2980.72	786.506	-8.192	5.566	Q1_closed_17_E1_3_10_0001
-2959.21	481.064	-8.934	5.649	Q1_closed_17_E1_3_10_0002
-2971.42	184.345	-11.05	6.774	Q1_closed_17_E1_4_10_0001
-2986.11	1431.02	-8.885	5.545	Q1_closed_17_E1_4_10_0002
-2767.6	794.564	-21.472	3.834	Q1_closed_17_E1_5_10_0001
-2958.55	1128.77	-7.15	5.119	Q1_closed_17_E1_5_10_0002
-2976.74	884.425	-4.409	6.031	Q1_closed_17_E1_6_10_0001
-2986.51	227.199	-11.328	5.771	Q1_closed_17_E1_6_10_0002
-2939.43	1579.47	-3.469	7.198	Q1_closed_17_E1_7_10_0001
-2985.73	154.453	-13.252	5.063	Q1_closed_17_E1_7_10_0002
-2977.11	1151.63	-10.22	7.023	Q1_closed_17_E1_8_10_0001
-2951.09	794.957	-3.959	9.102	Q1_closed_17_E1_8_10_0002
-2984.52	149.78	-9.971	4.782	Q1_closed_17_E1_9_10_0001
-3000.62	855.308	-18.997	7.794	Q1_closed_17_E1_9_10_0002
-2900.38	800.635	-5.672	6.239	Q1_closed_18_E1_10_10_0001
-2897.34	785.355	-7.431	8.598	Q1_closed_18_E1_10_10_0002
-2796.44	1182.98	-5.895	6.116	Q1_closed_18_E1_1_10_0001
-2931.06	46.031	-20.703	4.358	Q1_closed_18_E1_1_10_0002
-2930.28	621.127	-11.876	3.618	Q1_closed_18_E1_2_10_0001
-2916.81	1046.03	-11.709	6.191	Q1_closed_18_E1_2_10_0002
-2917.51	76.929	-16.042	5.497	Q1_closed_18_E1_3_10_0001
-2908.02	499.18	-12.391	5.116	Q1_closed_18_E1_3_10_0002
-2926.94	89.272	-20.293	4.295	Q1_closed_18_E1_4_10_0001
-2924.57	350.699	-13.32	5.006	Q1_closed_18_E1_4_10_0002
-2921.51	120.89	-10.952	4.535	Q1_closed_18_E1_5_10_0001
-2900.68	588.317	-10.44	5.546	Q1_closed_18_E1_5_10_0002
-2899.08	652.394	-7.877	7.665	Q1_closed_18_E1_6_10_0001
-2930.52	57.406	-22.776	5.528	Q1_closed_18_E1_6_10_0002
-2925.16	263.118	-14.226	7.063	Q1_closed_18_E1_7_10_0001
-2882.49	852.354	-5.189	7.936	Q1_closed_18_E1_7_10_0002
-2923.9	82.96	-18.546	5.034	Q1_closed_18_E1_8_10_0001
-2903.48	297.567	-10.549	3.537	Q1_closed_18_E1_8_10_0002
-2920.89	1429.86	-14.578	6.47	Q1_closed_18_E1_9_10_0001
-2920.92	1955.16	-9.298	6.861	Q1_closed_18_E1_9_10_0002
-3029.78	481.247	-5.733	3.13	Q1_closed_19_E1_10_10_0001
-2983.01	363.568	-10.669	4.439	Q1_closed_19_E1_10_10_0002
-3002.09	45.643	-14.575	3.645	Q1_closed_19_E1_1_10_0001
-3019.53	776.251	-6.698	7.076	Q1_closed_19_E1_1_10_0002
-2986.46	2096.82	-7.487	8.991	Q1_closed_19_E1_2_10_0001
-2988.62	1266.71	-6.773	5.925	Q1_closed_19_E1_2_10_0002
-2979.32	1032.5	-5.791	6.806	Q1_closed_19_E1_3_10_0001
-3011.24	352.255	-12.174	5.82	Q1_closed_19_E1_3_10_0002
-3024.28	60.234	-18.723	4.884	Q1_closed_19_E1_4_10_0001
-3020.4	87.2	-12.93	5.108	Q1_closed_19_E1_4_10_0002
-2861.61	620.277	-11.598	4.409	Q1_closed_19_E1_5_10_0001
-3018.68	136.491	-13.763	5.192	Q1_closed_19_E1_5_10_0002
-3018.16	1049.58	-14.146	5.499	Q1_closed_19_E1_6_10_0001
-3037.01	1049.64	-9.29	4.45	Q1_closed_19_E1_6_10_0002
-3026.97	84.342	-26.343	4.649	Q1_closed_19_E1_7_10_0001
-3018.72	685.009	-9.823	6.208	Q1_closed_19_E1_7_10_0002
-2995.52	143.585	-8.997	4.868	Q1_closed_19_E1_8_10_0001
-2975.36	2118.27	-9.322	8.772	Q1_closed_19_E1_8_10_0002
-2977.69	114.046	-6.133	4.715	Q1_closed_19_E1_9_10_0001
-2982.41	253.187	-8.015	3.971	Q1_closed_19_E1_9_10_0002
-2953.44	844.96	-12.478	10.771	Q1_closed_1_E1_10_10_0001
-2963.6	211.742	-13.908	5.289	Q1_closed_1_E1_10_10_0002
-2956.07	1399.77	-5.875	5.587	Q1_closed_1_E1_1_10_0001
-2946.21	476.051	-6.907	5.59	Q1_closed_1_E1_1_10_0002
-2971.16	89.543	-13.72	5.584	Q1_closed_1_E1_2_10_0001
-2932.89	1292.09	-4.532	5.938	Q1_closed_1_E1_2_10_0002
-2890.66	12922.5	-0.753	21.595	Q1_closed_1_E1_3_10_0001
-2963.91	97.657	-12.432	5.16	Q1_closed_1_E1_3_10_0002
-2975.89	68.345	-16.552	5.083	Q1_closed_1_E1_4_10_0001
-2903.27	407.074	-7.236	7.554	Q1_closed_1_E1_4_10_0002
-2900.26	355.942	-8.179	4.016	Q1_closed_1_E1_5_10_0001
-2948.59	1480.34	-3.281	6.399	Q1_closed_1_E1_5_10_0002
-2825.8	1054.3	-14.87	5.174	Q1_closed_1_E1_6_10_0001
-2953.85	661.277	-11.953	4.779	Q1_closed_1_E1_6_10_0002
-2961.68	1320.08	-9.674	7.534	Q1_closed_1_E1_7_10_0001
-2943.09	987.859	-4.522	5.303	Q1_closed_1_E1_7_10_0002
-2962.54	272.046	-9.356	5.333	Q1_closed_1_E1_8_10_0001
-2963.41	302.01	-11.164	5.256	Q1_closed_1_E1_8_10_0002
-2919.63	257.675	-7.591	3.973	Q1_closed_1_E1_9_10_0001
-2941.53	297.383	-6.465	4.392	Q1_closed_1_E1_9_10_0002
-2968.38	340.434	-10.6	3.319	Q1_closed_20_E1_10_10_0001
-2979.53	89.881	-13.319	3.043	Q1_closed_20_E1_10_10_0002
-2984.7	506.116	-14.75	6.323	Q1_closed_20_E1_1_10_0001
-2981.56	159.287	-12.085	4.054	Q1_closed_20_E1_1_10_0002
-3005.81	280.161	-7.213	5.023	Q1_closed_20_E1_2_10_0001
-3001.51	72.426	-14.098	4.564	Q1_closed_20_E1_2_10_0002
-3009.35	50.571	-12.603	4.157	Q1_closed_20_E1_3_10_0001
-3010.11	1603.66	-12.144	7.149	Q1_closed_20_E1_3_10_0002
-2934.26	309.275	-8.299	5.745	Q1_closed_20_E1_4_10_0001
-2984.5	394.158	-12.617	4.625	Q1_closed_20_E1_4_10_0002
-2962.28	634.988	-6.656	7.582	Q1_closed_20_E1_5_10_0001
-3005.96	117.05	-10.838	4.672	Q1_closed_20_E1_5_10_0002
-2970.4	380.591	-5.634	4.789	Q1_closed_20_E1_6_10_0001
-3006.02	2048.59	-11.153	7.939	Q1_closed_20_E1_6_10_0002
-3000.89	1683.62	-5.678	6.54	Q1_closed_20_E1_7_10_0001
-2994.33	245.479	-5.761	4.074	Q1_closed_20_E1_7_10_0002
-2958.7	1970.83	-7.476	10.112	Q1_closed_20_E1_8_10_0001
-2975.33	2176.16	-5.519	7.313	Q1_closed_20_E1_8_10_0002
-3015.36	191.395	-20.413	4.754	Q1_closed_20_E1_9_10_0001
-2979.43	1088.38	-8.857	4.342	Q1_closed_20_E1_9_10_0002
-2885.64	192.258	-8.312	5.342	Q1_closed_2_E1_10_10_0001
-2974.08	196.549	-9.448	5.222	Q1_closed_2_E1_10_10_0002
-2842.34	3086.3	-2.721	7.437	Q1_closed_2_E1_1_10_0001
-2950.02	602.664	-12.088	4.623	Q1_closed_2_E1_1_10_0002
-2948.44	263.653	-8.11	3.924	Q1_closed_2_E1_2_10_0001
-2921.8	1248.47	-5.516	6.689	Q1_closed_2_E1_2_10_0002
-2976.99	1822.86	-10.71	7.591	Q1_closed_2_E1_3_10_0001
-2972.59	1226.15	-8.785	8.189	Q1_closed_2_E1_3_10_0002
-2770.48	93.159	-5.934	3.961	Q1_closed_2_E1_4_10_0001
-2977.15	64.845	-14.048	4.452	Q1_closed_2_E1_4_10_0002
-2946.6	1297.92	-6.132	6.491	Q1_closed_2_E1_5_10_0001
-2972.38	2013.55	-10.481	7.105	Q1_closed_2_E1_5_10_0002
-2980.63	69.396	-13.639	4.201	Q1_closed_2_E1_6_10_0001
-2942.16	272.864	-10.243	5.338	Q1_closed_2_E1_6_10_0002
-2946.33	1341.68	-5.708	6.375	Q1_closed_2_E1_7_10_0001
-2957.75	242.773	-7.746	3.933	Q1_closed_2_E1_7_10_0002
-2945.59	400.466	-6.689	4.863	Q1_closed_2_E1_8_10_0001
-2949.6	246.281	-10.692	3.191	Q1_closed_2_E1_8_10_0002
-2936.14	1736.26	-3.09	10.396	Q1_closed_2_E1_9_10_0001
-2950.7	220.367	-7.117	3.139	Q1_closed_2_E1_9_10_0002
-2953.91	1705.18	-5.421	6.296	Q1_closed_3_E1_10_10_0001
-2982.34	1164.19	-7.174	5.648	Q1_closed_3_E1_10_10_0002
-2998.02	79.118	-21.845	5.318	Q1_closed_3_E1_1_10_0001
-2955.97	1361.57	-5.505	6.225	Q1_closed_3_E1_1_10_0002
-2986.03	51.676	-12.723	4.583	Q1_closed_3_E1_2_10_0001
-2957.33	654.097	-10.62	4.369	Q1_closed_3_E1_2_10_0002
-2969.04	276.511	-8.037	4.971	Q1_closed_3_E1_3_10_0001
-2988.33	142.731	-11.199	5.511	Q1_closed_3_E1_3_10_0002
-2960.32	907.491	-6.08	6.296	Q1_closed_3_E1_4_10_0001
-2977.43	1316.68	-4.543	5.616	Q1_closed_3_E1_4_10_0002
-2943.01	131.27	-5.428	4.392	Q1_closed_3_E1_5_10_0001
-2954.15	234.21	-12.601	3.202	Q1_closed_3_E1_5_10_0002
-2980.65	134.415	-10.178	5.356	Q1_closed_3_E1_6_10_0001
-2963.3	249.237	-12.01	3.84	Q1_closed_3_E1_6_10_0002
-2964.23	484.81	-6.39	5.719	Q1_closed_3_E1_7_10_0001
-2980.58	651.909	-9.015	5.409	Q1_closed_3_E1_7_10_0002
-2985.63	106.712	-14.189	3.923	Q1_closed_3_E1_8_10_0001
-2981.92	1512.51	-10.49	7.133	Q1_closed_3_E1_8_10_0002
-2968.55	108.886	-5.849	3.734	Q1_closed_3_E1_9_10_0001
-2959.27	368.476	-10.47	3.56	Q1_closed_3_E1_9_10_0002
-2964.48	1401.73	-6.439	6.238	Q1_closed_4_E1_10_10_0001
-2935.25	1132.18	-3.156	5.837	Q1_closed_4_E1_10_10_0002
-2950.33	964.514	-14.434	5.91	Q1_closed_4_E1_1_10_0001
-2933.67	172.645	-11.149	3.908	Q1_closed_4_E1_1_10_0002
-2906.42	1169.18	-8.218	5.05	Q1_closed_4_E1_2_10_0001
-2926.94	1859.54	-4.774	13.705	Q1_closed_4_E1_2_10_0002
-2658.96	963.863	-6.381	4.717	Q1_closed_4_E1_3_10_0001
-2931.01	691.529	-8.586	6.676	Q1_closed_4_E1_3_10_0002
-2929.74	663.002	-9.392	4.477	Q1_closed_4_E1_4_10_0001
-2935.1	108.443	-12.694	2.377	Q1_closed_4_E1_4_10_0002
-2957.21	1092.71	-5.994	5.222	Q1_closed_4_E1_5_10_0001
-2952.26	210.203	-9.962	6.193	Q1_closed_4_E1_5_10_0002
-2958.63	231.846	-14.131	5.325	Q1_closed_4_E1_6_10_0001
-2924.72	1163.5	-2.807	5.599	Q1_closed_4_E1_6_10_0002
-2959.19	86.244	-18.951	4.485	Q1_closed_4_E1_7_10_0001
-2898.65	223.589	-12.025	3.397	Q1_closed_4_E1_7_10_0002
-2928.38	846.304	-10.037	12.072	Q1_closed_4_E1_8_10_0001
-2931.2	255.83	-11.496	3.396	Q1_closed_4_E1_8_10_0002
-2944.76	245.358	-10.187	6.177	Q1_closed_4_E1_9_10_0001
-2919.43	256.873	-8.899	5.38	Q1_closed_4_E1_9_10_0002
-2957.07	211.494	-10.799	3.428	Q1_closed_5_E1_10_10_0001
-2966.4	455.22	-10.866	4.626	Q1_closed_5_E1_10_10_0002
-2992.61	177.76	-13.34	5.152	Q1_closed_5_E1_1_10_0001
-2964.44	285.998	-5.474	3.924	Q1_closed_5_E1_1_10_0002
-2955.86	577.174	-8.596	6.095	Q1_closed_5_E1_2_10_0001
-2977.54	178.761	-5.167	3.741	Q1_closed_5_E1_2_10_0002
-2985.73	700.109	-18.848	3.137	Q1_closed_5_E1_3_10_0001
-2990.78	210.087	-13.099	5.315	Q1_closed_5_E1_3_10_0002
-2990.12	913.15	-15.215	6.347	Q1_closed_5_E1_4_10_0001
-2981.33	396.627	-9.493	4.724	Q1_closed_5_E1_4_10_0002
-2468.91	1234.17	-3.491	7.065	Q1_closed_5_E1_5_10_0001
-2964.48	257.532	-10.521	3.361	Q1_closed_5_E1_5_10_0002
-2988.13	57.163	-13.78	3.704	Q1_closed_5_E1_6_10_0001
-2992.73	294.289	-13.016	6.873	Q1_closed_5_E1_6_10_0002
-2957.22	368.124	-10.071	3.339	Q1_closed_5_E1_7_10_0001
-2970.86	249.613	-12.152	3.138	Q1_closed_5_E1_7_10_0002
-2983	657.774	-8.836	5.839	Q1_closed_5_E1_8_10_0001
-2967.4	286.823	-7.899	3.923	Q1_closed_5_E1_8_10_0002
-2961.44	382.776	-7.902	3.365	Q1_closed_5_E1_9_10_0001
-2978.74	1655.8	-13.916	7.063	Q1_closed_5_E1_9_10_0002
-2901.49	1293.2	-3.669	7.38	Q1_closed_6_E1_10_10_0001
-2901.65	555.513	-11.134	4.694	Q1_closed_6_E1_10_10_0002
-2927.99	68.235	-14.962	4.884	Q1_closed_6_E1_1_10_0001
-2939.28	110.211	-15.649	5.361	Q1_closed_6_E1_1_10_0002
-2910.62	213.397	-12.354	4.497	Q1_closed_6_E1_2_10_0001
-2904.48	1309.62	-7.586	5.855	Q1_closed_6_E1_2_10_0002
-2938.6	68.035	-18.454	5.536	Q1_closed_6_E1_3_10_0001
-2897.4	262.202	-10.131	4.229	Q1_closed_6_E1_3_10_0002
-2896.42	337.484	-9.545	3.922	Q1_closed_6_E1_4_10_0001
-2904.26	345.333	-6.255	5.373	Q1_closed_6_E1_4_10_0002
-2904.46	1359.8	-7.334	5.48	Q1_closed_6_E1_5_10_0001
-2929.79	1506.55	-5.32	6.859	Q1_closed_6_E1_5_10_0002
-2928.54	3299.39	-11.978	11.071	Q1_closed_6_E1_6_10_0001
-2896.99	1379.03	-5.85	5.654	Q1_closed_6_E1_6_10_0002
-2927.3	253.689	-10.678	5.468	Q1_closed_6_E1_7_10_0001
-2897.85	365.464	-8.481	3.368	Q1_closed_6_E1_7_10_0002
-2933.98	846.668	-12.965	6.05	Q1_closed_6_E1_8_10_0001
-2943.86	154.578	-11.178	6.203	Q1_closed_6_E1_8_10_0002
-2904.57	391.534	-9.177	3.634	Q1_closed_6_E1_9_10_0001
-2901.58	1655.33	-6.602	6.18	Q1_closed_6_E1_9_10_0002
-2922.03	224.057	-11.434	4.726	Q1_closed_7_E1_10_10_0001
-2948.06	2033.98	-12.395	6.742	Q1_closed_7_E1_10_10_0002
-2868.54	296.53	-6.708	4.852	Q1_closed_7_E1_1_10_0001
-2946.74	1002.48	-3.647	7.183	Q1_closed_7_E1_1_10_0002
-2938.49	1098.68	-5.249	7.4	Q1_closed_7_E1_2_10_0001
-2952.79	870.815	-16.441	6.303	Q1_closed_7_E1_2_10_0002
-2931.81	89.834	-6.177	4.554	Q1_closed_7_E1_3_10_0001
-2945.68	88.526	-8.937	4.256	Q1_closed_7_E1_3_10_0002
-2920.91	961.864	-8.305	6.619	Q1_closed_7_E1_4_10_0001
-2918.35	87.335	-11.162	3.803	Q1_closed_7_E1_4_10_0002
-2936.9	1274.37	-4.898	9.245	Q1_closed_7_E1_5_10_0001
-2949.64	188.623	-11.573	6.856	Q1_closed_7_E1_5_10_0002
-2926.31	1074.11	-6.253	7.487	Q1_closed_7_E1_6_10_0001
-2940.59	1784.86	-7.615	6.692	Q1_closed_7_E1_6_10_0002
-2940.62	209.994	-13.713	4.873	Q1_closed_7_E1_7_10_0001
-2954.04	58.397	-20.319	4.506	Q1_closed_7_E1_7_10_0002
-2949.18	94.455	-25.633	4.738	Q1_closed_7_E1_8_10_0001
-2929.18	1625.59	-2.162	7.559	Q1_closed_7_E1_8_10_0002
-2881.63	316.738	-7.043	4.452	Q1_closed_7_E1_9_10_0001
-2920.11	1182.45	-6.343	5.536	Q1_closed_7_E1_9_10_0002
-2947.81	833.003	-13.363	9.419	Q1_closed_8_E1_10_10_0001
-2939.45	286.215	-10.485	3.606	Q1_closed_8_E1_10_10_0002
-2935.12	787.257	-7.72	8.91	Q1_closed_8_E1_1_10_0001
-2945.63	119.486	-8.299	4.34	Q1_closed_8_E1_1_10_0002
-2954.56	2491.8	-10.932	8.834	Q1_closed_8_E1_2_10_0001
-2960.53	297.974	-9.592	5.143	Q1_closed_8_E1_2_10_0002
-2924.38	416.862	-7.042	3.73	Q1_closed_8_E1_3_10_0001
-2929.28	1158.05	-9.951	6.825	Q1_closed_8_E1_3_10_0002
-2957.48	1134.76	-4.568	8.364	Q1_closed_8_E1_4_10_0001
-2948.64	1482.6	-5.89	5.785	Q1_closed_8_E1_4_10_0002
-2936.34	254.044	-9.132	3.217	Q1_closed_8_E1_5_10_0001
-2953.79	1318.19	-2.638	6.718	Q1_closed_8_E1_5_10_0002
-2953.82	794.088	-3.357	6.808	Q1_closed_8_E1_6_10_0001
-2963.2	491.501	-14.003	4.935	Q1_closed_8_E1_6_10_0002
-2958.35	145.365	-6.788	4.531	Q1_closed_8_E1_7_10_0001
-2940.6	336.708	-9.576	3.565	Q1_closed_8_E1_7_10_0002
-2925	1412.5	-0.906	7.898	Q1_closed_8_E1_8_10_0001
-2962.61	875.314	-11.587	5.361	Q1_closed_8_E1_8_10_0002
-2941.54	590.246	-9.606	8.054	Q1_closed_8_E1_9_10_0001
-2949.17	535.178	-10.544	6.691	Q1_closed_8_E1_9_10_0002
-2911.8	176.54	-8.748	4.415	Q1_closed_9_E1_10_10_0001
-2954.3	819.695	-15.838	7.432	Q1_closed_9_E1_10_10_0002
-2915.72	180.473	-10.834	5.036	Q1_closed_9_E1_1_10_0001
-2935.12	2147.82	-8.531	8.442	Q1_closed_9_E1_1_10_0002
-2942.29	2066.4	-15.815	8.664	Q1_closed_9_E1_2_10_0001
-2949.82	101.69	-17.703	5.308	Q1_closed_9_E1_2_10_0002
-2245.07	1072.53	-6.752	6.392	Q1_closed_9_E1_3_10_0001
-2918.23	149.987	-12.263	3.317	Q1_closed_9_E1_3_10_0002
-2961.82	1446.07	-11.714	6.46	Q1_closed_9_E1_4_10_0001
-2907.05	1165.11	-5.144	7.172	Q1_closed_9_E1_4_10_0002
-2955.14	242.277	-13.828	3.206	Q1_closed_9_E1_5_10_0001
-2954.63	1122.04	-9.769	4.768	Q1_closed_9_E1_5_10_0002
-2945.24	174.647	-13.646	4.519	Q1_closed_9_E1_6_10_0001
-2914.56	1293.75	-5.362	5.631	Q1_closed_9_E1_6_10_0002
-2914.84	696.186	-2.787	4.907	Q1_closed_9_E1_7_10_0001
-2921.46	265.696	-13.474	3.164	Q1_closed_9_E1_7_10_0002
-2945.61	116.503	-14.833	5.305	Q1_closed_9_E1_8_10_0001
-2951.66	2055.48	-15.357	8.751	Q1_closed_9_E1_8_10_0002
-2946.74	391.954	-10.906	3.472	Q1_closed_9_E1_9_10_0001
-2956.47	118.111	-15.527	5.155	Q1_closed_9_E1_9_10_0002
-2877.8	220.596	-7.526	2.32	Q1_closed_10_E1_10_11_0001
-2915.1	582.408	-10.963	6.164	Q1_closed_10_E1_10_11_0002
-2868.4	232.004	-7.874	2.795	Q1_closed_10_E1_1_11_0001
-2898.99	107.55	-7.952	5.106	Q1_closed_10_E1_1_11_0002
-2735.27	8712.29	-7.896	18.633	Q1_closed_10_E1_2_11_0001
-2892.24	270.937	-13.512	3.12	Q1_closed_10_E1_2_11_0002
-2889.63	307.953	-13.435	4.433	Q1_closed_10_E1_3_11_0001
-2466.01	862.028	-11.172	6.122	Q1_closed_10_E1_3_11_0002
-2913.7	1027.01	-7.84	9.192	Q1_closed_10_E1_4_11_0001
-2885.38	6978.48	-9.469	12.786	Q1_closed_10_E1_4_11_0002
-2889.88	1673.93	-2.742	7.131	Q1_closed_10_E1_5_11_0001
-2909.68	333.507	-8.126	5.587	Q1_closed_10_E1_5_11_0002
-2885.85	900.746	-10.381	4.007	Q1_closed_10_E1_6_11_0001
-2913.99	780.907	-6.364	7.18	Q1_closed_10_E1_6_11_0002
-2891.97	259.483	-6.805	5.076	Q1_closed_10_E1_7_11_0001
-2909.64	280.272	-8.199	4.28	Q1_closed_10_E1_7_11_0002
-2913.5	1409.31	-9.281	6.712	Q1_closed_10_E1_8_11_0001
-2884.43	1264.18	-12.978	5.461	Q1_closed_10_E1_8_11_0002
-2917.15	1052.94	-8.255	6.701	Q1_closed_10_E1_9_11_0001
-2906.77	1597.37	-4.157	8.372	Q1_closed_10_E1_9_11_0002
-2899.58	422.777	-8.066	5.663	Q1_closed_11_E1_10_11_0001
-2914.51	1635.57	-8.639	7.064	Q1_closed_11_E1_10_11_0002
-2886.55	219.567	-6.31	4.607	Q1_closed_11_E1_1_11_0001
-2910.15	1478.7	-2.7	7.246	Q1_closed_11_E1_1_11_0002
-2929.04	76.337	-19.411	5.341	Q1_closed_11_E1_2_11_0001
-2922.91	323.796	-14.112	5.804	Q1_closed_11_E1_2_11_0002
-2894.13	160.992	-9.98	2.481	Q1_closed_11_E1_3_11_0001
-2904.46	298.473	-7.748	5.644	Q1_closed_11_E1_3_11_0002
-2824.85	871.632	-13.048	3.529	Q1_closed_11_E1_4_11_0001
-2599.02	691.493	-12.965	3.583	Q1_closed_11_E1_4_11_0002
-2893.14	670.352	-7.189	4.159	Q1_closed_11_E1_5_11_0001
-2917.6	113.937	-10.561	5.105	Q1_closed_11_E1_5_11_0002
-2932.66	344.187	-18.886	5.929	Q1_closed_11_E1_6_11_0001
-2908.29	234.378	-4.524	5.142	Q1_closed_11_E1_6_11_0002
-2913.23	1029.67	-5.433	4.42	Q1_closed_11_E1_7_11_0001
-2894.95	712.599	-8.31	4.919	Q1_closed_11_E1_7_11_0002
-2921.29	381.851	-12.407	5.729	Q1_closed_11_E1_8_11_0001
-2899.06	1581.05	-4.923	6.304	Q1_closed_11_E1_8_11_0002
-2886.6	126.864	-10.954	3.412	Q1_closed_11_E1_9_11_0001
-2901.81	581.187	-5.339	4.934	Q1_closed_11_E1_9_11_0002
-2935.01	673.257	-15.072	7.656	Q1_closed_12_E1_10_11_0001
-2911	136.219	-5.827	5.17	Q1_closed_12_E1_10_11_0002
-2919.78	2559.47	-8.144	8.856	Q1_closed_12_E1_1_11_0001
-2953.84	933.878	-3.36	4.73	Q1_closed_12_E1_1_11_0002
-2951.23	67.118	-16.673	5.558	Q1_closed_12_E1_2_11_0001
-2947.18	642.445	-8.753	6.668	Q1_closed_12_E1_2_11_0002
-2946.37	354.412	-14.883	6.224	Q1_closed_12_E1_3_11_0001
-2925.05	1453.79	-9.302	7.662	Q1_closed_12_E1_3_11_0002
-2944.09	558.708	-11.962	6.121	Q1_closed_12_E1_4_11_0001
-2930.23	365.434	-12.46	4.058	Q1_closed_12_E1_4_11_0002
-2861.3	863.182	-6.557	7.021	Q1_closed_12_E1_5_11_0001
-2925.16	228.424	-13.42	3.369	Q1_closed_12_E1_5_11_0002
-2948.41	53.509	-20.299	4.932	Q1_closed_12_E1_6_11_0001
-2924.08	1062.12	-6.228	5.151	Q1_closed_12_E1_6_11_0002
-2939.84	197.84	-7.291	4.563	Q1_closed_12_E1_7_11_0001
-2941.24	181.057	-9.743	5.964	Q1_closed_12_E1_7_11_0002
-2923.58	1194.53	-5.08	5.031	Q1_closed_12_E1_8_11_0001
-2936.27	112.699	-12.676	4.959	Q1_closed_12_E1_8_11_0002
-2937.15	1110.9	-7.929	10.638	Q1_closed_12_E1_9_11_0001
-2492.78	1611.35	-2.62	7.557	Q1_closed_12_E1_9_11_0002
-2960.84	902.117	-10.151	5.409	Q1_closed_13_E1_10_11_0001
-2956.67	463.876	-6.037	6.714	Q1_closed_13_E1_10_11_0002
-2934.16	228.331	-20.819	2.234	Q1_closed_13_E1_1_11_0001
-2934.69	333.427	-6.281	4.224	Q1_closed_13_E1_1_11_0002
-2933.63	406.519	-7.367	4.558	Q1_closed_13_E1_2_11_0001
-2961.19	1311.78	-5.719	7.504	Q1_closed_13_E1_2_11_0002
-2973.44	56.68	-22.728	4.732	Q1_closed_13_E1_3_11_0001
-2961.85	1615.41	-6.229	9.172	Q1_closed_13_E1_3_11_0002
-2936.39	884.636	-5.514	4.664	Q1_closed_13_E1_4_11_0001
-2931.1	55.861	-8.901	3.257	Q1_closed_13_E1_4_11_0002
-2944.92	1877.88	-4.249	7.127	Q1_closed_13_E1_5_11_0001
-2930.64	1589.7	-4.911	7.027	Q1_closed_13_E1_5_11_0002
-2933.69	1448.1	-5.278	6.381	Q1_closed_13_E1_6_11_0001
-2961.78	134.222	-11.456	5.054	Q1_closed_13_E1_6_11_0002
-2956.38	921.882	-8.251	6.166	Q1_closed_13_E1_7_11_0001
-2937.22	291.89	-15.003	3.644	Q1_closed_13_E1_7_11_0002
-2959.43	124.588	-9.348	5.269	Q1_closed_13_E1_8_11_0001
-2937.6	286.941	-15.797	3.274	Q1_closed_13_E1_8_11_0002
-2953.46	1599.57	-3.292	6.436	Q1_closed_13_E1_9_11_0001
-2941.21	306.216	-15.382	3.273	Q1_closed_13_E1_9_11_0002
-2936.68	67.187	-24.996	4.129	Q1_closed_14_E1_10_11_0001
-2888.53	587.871	-4.867	4.13	Q1_closed_14_E1_10_11_0002
-2930.1	133.399	-13.304	4.827	Q1_closed_14_E1_1_11_0001
-2894.21	233.659	-9.207	3.364	Q1_closed_14_E1_1_11_0002
-2893.95	1918.35	-13.916	9.19	Q1_closed_14_E1_2_11_0001
-2891.86	354.331	-6.57	4.63	Q1_closed_14_E1_2_11_0002
-2918.48	399.902	-4.844	5.227	Q1_closed_14_E1_3_11_0001
-2926.64	1409.58	-13.298	7.101	Q1_closed_14_E1_3_11_0002
-2855.95	9722.43	-4.002	19.722	Q1_closed_14_E1_4_11_0001
-2925.23	1530.73	-13.785	7.976	Q1_closed_14_E1_4_11_0002
-2931.37	1201.06	-6.637	4.697	Q1_closed_14_E1_5_11_0001
-2887.75	513.293	-6.098	5.346	Q1_closed_14_E1_5_11_0002
-2878.01	1189.31	-8.421	7.675	Q1_closed_14_E1_6_11_0001
-2916.79	223.561	-8.565	5.657	Q1_closed_14_E1_6_11_0002
-2782.59	231.791	-13.204	5.559	Q1_closed_14_E1_7_11_0001
-2887.94	1718	-6.332	6.032	Q1_closed_14_E1_7_11_0002
-2874.93	415.308	-12.196	3.268	Q1_closed_14_E1_8_11_0001
-2918.22	155.678	-11.275	4.923	Q1_closed_14_E1_8_11_0002
-2890.65	357.42	-10.182	4.876	Q1_closed_14_E1_9_11_0001
-2923.76	2875.83	-5.09	9.686	Q1_closed_14_E1_9_11_0002
-2915.51	176.836	-12.224	3.277	Q1_closed_15_E1_10_11_0001
-2918.43	1248.97	-2.512	7.645	Q1_closed_15_E1_10_11_0002
-2913.03	305.686	-5.551	3.467	Q1_closed_15_E1_1_11_0001
-2949.11	2017.61	-1.246	7.092	Q1_closed_15_E1_1_11_0002
-2968.27	314.078	-13.155	5.578	Q1_closed_15_E1_2_11_0001
-2974.71	84.344	-20.821	4.623	Q1_closed_15_E1_2_11_0002
-2843.1	927.447	-9.366	4.479	Q1_closed_15_E1_3_11_0001
-2967.89	384.166	-19.372	6.767	Q1_closed_15_E1_3_11_0002
-2964.18	79.057	-16.988	5.339	Q1_closed_15_E1_4_11_0001
-2926.56	792.721	-5.419	8.738	Q1_closed_15_E1_4_11_0002
-2959.45	507.236	-8.458	5.766	Q1_closed_15_E1_5_11_0001
-2950.2	1220.85	-7.013	7.513	Q1_closed_15_E1_5_11_0002
-2962.5	1320.44	-10.533	7.17	Q1_closed_15_E1_6_11_0001
-2972.49	113.459	-12.805	5.765	Q1_closed_15_E1_6_11_0002
-2967.92	281.35	-10.926	6.386	Q1_closed_15_E1_7_11_0001
-2946.41	2325.34	-16.037	9.005	Q1_closed_15_E1_7_11_0002
-2904.18	231.738	-3.976	2.971	Q1_closed_15_E1_8_11_0001
-2951.98	1368.15	-9.3	8.305	Q1_closed_15_E1_8_11_0002
-2929.83	270.066	-9.414	3.382	Q1_closed_15_E1_9_11_0001
-2948.4	136.448	-6.044	4.622	Q1_closed_15_E1_9_11_0002
-2996.74	289.645	-11.744	3.779	Q1_closed_16_E1_10_11_0001
-2990.65	1741.28	-9.022	6.251	Q1_closed_16_E1_10_11_0002
-3015.33	931.834	-10.148	6.229	Q1_closed_16_E1_1_11_0001
-3002.51	436.511	-12.691	4.555	Q1_closed_16_E1_1_11_0002
-2989.76	1377.87	-7.734	12.681	Q1_closed_16_E1_2_11_0001
-3029.78	314.08	-7.193	3.928	Q1_closed_16_E1_2_11_0002
-3005.26	1776.39	-11.249	8.268	Q1_closed_16_E1_3_11_0001
-2984.9	797.216	-11.797	4.058	Q1_closed_16_E1_3_11_0002
-3015.41	78.361	-16.262	4.035	Q1_closed_16_E1_4_11_0001
-2995.95	958.055	-5.512	5.018	Q1_closed_16_E1_4_11_0002
-2996.11	312.935	-14.738	3.285	Q1_closed_16_E1_5_11_0001
-2998.64	256.516	-9.903	6.507	Q1_closed_16_E1_5_11_0002
-3006.81	381.353	-3.947	5.808	Q1_closed_16_E1_6_11_0001
-2986.98	1153.21	-3.239	6.63	Q1_closed_16_E1_6_11_0002
-3002.63	1144.88	-8.307	8.511	Q1_closed_16_E1_7_11_0001
-2998.08	972.421	-6.813	5.854	Q1_closed_16_E1_7_11_0002
-3001.95	1031.06	-5.286	7.387	Q1_closed_16_E1_8_11_0001
-3003.03	1168.72	-4.094	7.775	Q1_closed_16_E1_8_11_0002
-3009.51	105.021	-11.125	3.752	Q1_closed_16_E1_9_11_0001
-2988.71	689.431	-7.803	4.69	Q1_closed_16_E1_9_11_0002
-2990.53	234.987	-15.654	5.432	Q1_closed_17_E1_10_11_0001
-2980.22	559.047	-8.429	5.292	Q1_closed_17_E1_10_11_0002
-2972.86	696.409	-8.661	7.769	Q1_closed_17_E1_1_11_0001
-2958.52	854.476	-11.112	5.188	Q1_closed_17_E1_1_11_0002
-2964.81	669.703	-7.696	4.752	Q1_closed_17_E1_2_11_0001
-2930.2	1531.01	-6.941	14.322	Q1_closed_17_E1_2_11_0002
-2997.99	54.984	-20.516	5.576	Q1_closed_17_E1_3_11_0001
-2953.51	350.16	-10.932	4.802	Q1_closed_17_E1_3_11_0002
-2976.39	407.227	-8.872	4.485	Q1_closed_17_E1_4_11_0001
-2949.43	112.225	-6.253	3.324	Q1_closed_17_E1_4_11_0002
-2975.28	1624.56	-6.084	7.228	Q1_closed_17_E1_5_11_0001
-2955.07	235.189	-10.75	3.238	Q1_closed_17_E1_5_11_0002
-2956.54	1864.01	-10.54	6.133	Q1_closed_17_E1_6_11_0001
-2954.67	611.047	-8.365	5.998	Q1_closed_17_E1_6_11_0002
-2955.75	299.961	-12.796	4.02	Q1_closed_17_E1_7_11_0001
-2956.8	227.37	-9.195	3.314	Q1_closed_17_E1_7_11_0002
-2954.77	1343.56	-8.761	5.505	Q1_closed_17_E1_8_11_0001
-2969.14	1417.35	-3.92	7.658	Q1_closed_17_E1_8_11_0002
-2957.02	324.626	-12.713	3.723	Q1_closed_17_E1_9_11_0001
-2955.45	797.981	-10.28	5.538	Q1_closed_17_E1_9_11_0002
-2921.27	104.861	-11.139	4.581	Q1_closed_18_E1_10_11_0001
-2921.43	1958.92	-9.918	6.644	Q1_closed_18_E1_10_11_0002
-2919.8	252.449	-6.938	5.116	Q1_closed_18_E1_1_11_0001
-2922.69	703.307	-15.218	5.688	Q1_closed_18_E1_1_11_0002
-2905.04	308.56	-7.909	3.515	Q1_closed_18_E1_2_11_0001
-2920.62	674.57	-7.991	7.322	Q1_closed_18_E1_2_11_0002
-2923.33	2613.2	-16.704	9.445	Q1_closed_18_E1_3_11_0001
-2909.41	492.628	-12.798	4.588	Q1_closed_18_E1_3_11_0002
-2888.85	792.059	-7.826	10.549	Q1_closed_18_E1_4_11_0001
-2921.96	992.922	-10.637	6.359	Q1_closed_18_E1_4_11_0002
-2916.37	192.39	-12.026	5.223	Q1_closed_18_E1_5_11_0001
-2918.27	220.67	-11.626	5.293	Q1_closed_18_E1_5_11_0002
-2896.3	379.061	-14.347	4.298	Q1_closed_18_E1_6_11_0001
-2909.9	791.348	-17.162	5.087	Q1_closed_18_E1_6_11_0002
-2906.41	1340.16	-5.165	6.989	Q1_closed_18_E1_7_11_0001
-2901.12	243.226	-9.087	4.042	Q1_closed_18_E1_7_11_0002
-2918.88	482.231	-9.287	6.935	Q1_closed_18_E1_8_11_0001
-2851.41	2131.62	-7.322	6.807	Q1_closed_18_E1_8_11_0002
-2871.37	120.372	-13.812	4.767	Q1_closed_18_E1_9_11_0001
-2907.14	254.739	-11.099	3.11	Q1_closed_18_E1_9_11_0002
-2978.47	324.207	-15.605	3.873	Q1_closed_19_E1_10_11_0001
-3012.77	1203.32	-4.122	7.192	Q1_closed_19_E1_10_11_0002
-2896.26	1264.33	-5.697	6.537	Q1_closed_19_E1_1_11_0001
-2986.64	879.956	-7.391	5.09	Q1_closed_19_E1_1_11_0002
-3021.56	1103.38	-6.117	7.645	Q1_closed_19_E1_2_11_0001
-3036.8	288.976	-4.433	4.184	Q1_closed_19_E1_2_11_0002
-3019.97	75.048	-17.881	4.824	Q1_closed_19_E1_3_11_0001
-3023.47	269.594	-8.686	6.733	Q1_closed_19_E1_3_11_0002
-3022.9	595.751	-13.137	9.189	Q1_closed_19_E1_4_11_0001
-3034.74	375.223	-9.441	4.1	Q1_closed_19_E1_4_11_0002
-2991.35	282.949	-18.883	3.481	Q1_closed_19_E1_5_11_0001
-2961.56	469.566	-6.332	3.831	Q1_closed_19_E1_5_11_0002
-3032.5	1049.13	-13.029	7.79	Q1_closed_19_E1_6_11_0001
-2778.96	907.89	-7.061	6.264	Q1_closed_19_E1_6_11_0002
-3057.02	1571.13	-4.916	6.673	Q1_closed_19_E1_7_11_0001
-3030.95	213.936	-14.51	5.49	Q1_closed_19_E1_7_11_0002
-3019.91	349.859	-9.589	4.8	Q1_closed_19_E1_8_11_0001
-3016.38	78.802	-21.586	4.776	Q1_closed_19_E1_8_11_0002
-2969.1	1111.46	-8.524	6.606	Q1_closed_19_E1_9_11_0001
-3017.16	1546.82	-8.26	6.863	Q1_closed_19_E1_9_11_0002
-2952.2	357.878	-13.408	5.799	Q1_closed_1_E1_10_11_0001
-2965.81	306.819	-9.136	6.049	Q1_closed_1_E1_10_11_0002
-2962.56	1257.15	-12.462	7.597	Q1_closed_1_E1_1_11_0001
-2903.7	453.442	-13.572	4.535	Q1_closed_1_E1_1_11_0002
-2960.61	1281.98	-17.769	8.069	Q1_closed_1_E1_2_11_0001
-2956.45	1623.97	-6.226	6.114	Q1_closed_1_E1_2_11_0002
-2945.04	62.758	-5.698	2.735	Q1_closed_1_E1_3_11_0001
-2816.82	1024.19	-10.176	4.547	Q1_closed_1_E1_3_11_0002
-2941.89	966.045	-3.07	7.152	Q1_closed_1_E1_4_11_0001
-2943.67	1261.93	-6.689	6.612	Q1_closed_1_E1_4_11_0002
-2942.44	355.881	-10.62	3.551	Q1_closed_1_E1_5_11_0001
-2935.27	252.931	-12.173	3.395	Q1_closed_1_E1_5_11_0002
-2965.01	176.577	-14.673	5	Q1_closed_1_E1_6_11_0001
-2939.12	356.009	-8.998	4.225	Q1_closed_1_E1_6_11_0002
-2922.66	398.025	-9.569	3.606	Q1_closed_1_E1_7_11_0001
-2734.09	1746.64	-9.381	9.692	Q1_closed_1_E1_7_11_0002
-2956.56	1674.98	-12.001	7.901	Q1_closed_1_E1_8_11_0001
-2933.14	176.361	-12.373	6.038	Q1_closed_1_E1_8_11_0002
-2825.83	1223.12	-5.895	5.692	Q1_closed_1_E1_9_11_0001
-2939.43	193.895	-4.541	4.068	Q1_closed_1_E1_9_11_0002
-3007.33	113.428	-11.913	5.137	Q1_closed_20_E1_10_11_0001
-2982.87	1073.81	-13.432	5.472	Q1_closed_20_E1_10_11_0002
-2991.2	634.289	-6.154	4.954	Q1_closed_20_E1_1_11_0001
-3011.92	224.318	-15.505	6.864	Q1_closed_20_E1_1_11_0002
-3007.98	1822.07	-12.906	6.934	Q1_closed_20_E1_2_11_0001
-2964.41	388.417	-6.242	5.441	Q1_closed_20_E1_2_11_0002
-2973.46	205.833	-7.601	4.251	Q1_closed_20_E1_3_11_0001
-3010.26	790.14	-19.309	9.575	Q1_closed_20_E1_3_11_0002
-2888.77	330.917	-8.662	4.106	Q1_closed_20_E1_4_11_0001
-2986.55	1103.4	-8.539	5.342	Q1_closed_20_E1_4_11_0002
-3008.3	105.792	-9.355	4.259	Q1_closed_20_E1_5_11_0001
-2986.77	638.596	-15.165	3.83	Q1_closed_20_E1_5_11_0002
-2979.7	128.459	-15.751	2.037	Q1_closed_20_E1_6_11_0001
-3000.61	5109.86	-3.117	10.927	Q1_closed_20_E1_6_11_0002
-2991.96	726.642	-4.038	5.902	Q1_closed_20_E1_7_11_0001
-2983.83	203.672	-20.534	2.12	Q1_closed_20_E1_7_11_0002
-2977.35	1668.33	-5.552	6.378	Q1_closed_20_E1_8_11_0001
-3001.56	484.63	-8.476	5.581	Q1_closed_20_E1_8_11_0002
-2977.29	823.248	-4.351	6.746	Q1_closed_20_E1_9_11_0001
-3004.94	110.177	-9.693	4.561	Q1_closed_20_E1_9_11_0002
-3006.62	89.788	-13.701	2.281	Q1_closed_2_E1_10_11_0001
-2989.91	1256.77	-6.415	4.635	Q1_closed_2_E1_10_11_0002
-3008.21	103.763	-18.063	2.137	Q1_closed_2_E1_1_11_0001
-2992.92	1255.02	-3.659	5.326	Q1_closed_2_E1_1_11_0002
-2797.74	826.952	-9.738	4.49	Q1_closed_2_E1_2_11_0001
-2946.78	351.602	-6.465	4.237	Q1_closed_2_E1_2_11_0002
-2954.76	55.222	-18.863	4.751	Q1_closed_2_E1_3_11_0001
-2948.88	1139.51	-4.422	6.403	Q1_closed_2_E1_3_11_0002
-2863.59	159.296	-11.188	4.857	Q1_closed_2_E1_4_11_0001
-2947.63	386.132	-5.125	5.208	Q1_closed_2_E1_4_11_0002
-2970.32	645.411	-5.19	6.443	Q1_closed_2_E1_5_11_0001
-2966.2	348.44	-8.423	5.517	Q1_closed_2_E1_5_11_0002
-2948.7	1168.97	-3.828	6.334	Q1_closed_2_E1_6_11_0001
-2973.12	1468.55	-5.612	6.703	Q1_closed_2_E1_6_11_0002
-2985.23	1095.18	-4.168	7.323	Q1_closed_2_E1_7_11_0001
-2968.96	224.178	-7.574	4.44	Q1_closed_2_E1_7_11_0002
-2947.29	611.689	-5.384	6.549	Q1_closed_2_E1_8_11_0001
-2965.14	238.328	-8.536	5.312	Q1_closed_2_E1_8_11_0002
-2982.18	1556.23	-0.534	7.466	Q1_closed_2_E1_9_11_0001
-2949.71	250.218	-14.447	3.233	Q1_closed_2_E1_9_11_0002
-1889.72	2121.68	-5.216	8.275	Q1_closed_3_E1_10_11_0001
-2967.77	91.033	-8.364	3.227	Q1_closed_3_E1_10_11_0002
-2978.11	578.533	-4.816	6.714	Q1_closed_3_E1_1_11_0001
-2981.09	1612.86	-6.043	7.548	Q1_closed_3_E1_1_11_0002
-2973.16	438.563	-6.926	7.159	Q1_closed_3_E1_2_11_0001
-2982.36	148.128	-14.111	5.567	Q1_closed_3_E1_2_11_0002
-2972.06	302.621	-10.222	4.009	Q1_closed_3_E1_3_11_0001
-2960.49	339.988	-12.684	4.278	Q1_closed_3_E1_3_11_0002
-2961.02	264.083	-13.896	2.951	Q1_closed_3_E1_4_11_0001
-2983.03	169.882	-8.802	5.399	Q1_closed_3_E1_4_11_0002
-2982.32	1270.75	-8.291	7.671	Q1_closed_3_E1_5_11_0001
-2965.87	825.512	-7.982	7.128	Q1_closed_3_E1_5_11_0002
-2965.75	97.179	-8.341	3.519	Q1_closed_3_E1_6_11_0001
-2957.5	261.16	-7.63	3.599	Q1_closed_3_E1_6_11_0002
-2932.66	1235.64	-12.062	6.41	Q1_closed_3_E1_7_11_0001
-2957.63	1231.4	-10.575	5.437	Q1_closed_3_E1_7_11_0002
-2952.87	1724.04	-4.676	6.337	Q1_closed_3_E1_8_11_0001
-2948.46	935.879	-9.43	6.766	Q1_closed_3_E1_8_11_0002
-2954.18	1562.45	-5.502	6.518	Q1_closed_3_E1_9_11_0001
-2946.89	372.457	-11.577	3.566	Q1_closed_3_E1_9_11_0002
-2922.98	308.974	-11.265	4.108	Q1_closed_4_E1_10_11_0001
-2946.59	977.6	-3.147	6.005	Q1_closed_4_E1_10_11_0002
-2861.96	294.461	-8.638	2.669	Q1_closed_4_E1_1_11_0001
-2951.16	6401.77	-7.253	12.242	Q1_closed_4_E1_1_11_0002
-2954.95	1031.65	-15.323	6.125	Q1_closed_4_E1_2_11_0001
-2935.32	352.471	-12.892	4.121	Q1_closed_4_E1_2_11_0002
-2958.01	98.36	-16.658	5.758	Q1_closed_4_E1_3_11_0001
-2950.57	2042.15	-10.827	8.616	Q1_closed_4_E1_3_11_0002
-2946.95	288.565	-7.14	5.209	Q1_closed_4_E1_4_11_0001
-2936.55	939.713	-15.856	5.33	Q1_closed_4_E1_4_11_0002
-2919.22	1528.93	-7.714	7.835	Q1_closed_4_E1_5_11_0001
-2927.05	209.555	-8.402	3.858	Q1_closed_4_E1_5_11_0002
-2945.34	91.184	-11.375	5.525	Q1_closed_4_E1_6_11_0001
-2923.3	278.427	-8.855	2.593	Q1_closed_4_E1_6_11_0002
-2913.23	313.594	-12.629	3.136	Q1_closed_4_E1_7_11_0001
-2920.77	2036.84	-6.876	8.474	Q1_closed_4_E1_7_11_0002
-2947.89	976.247	-12.605	7.959	Q1_closed_4_E1_8_11_0001
-2954.87	163.483	-8.369	5.839	Q1_closed_4_E1_8_11_0002
-2733.91	1541.37	-11.128	6.794	Q1_closed_4_E1_9_11_0001
-2923.24	2153.84	-7.932	6.826	Q1_closed_4_E1_9_11_0002
-2981.68	1221.87	-3.123	6.796	Q1_closed_5_E1_10_11_0001
-2985.68	288.7	-11.672	5.899	Q1_closed_5_E1_10_11_0002
-2989.54	296.007	-11.379	5.785	Q1_closed_5_E1_1_11_0001
-2973.17	351.474	-15.826	4.386	Q1_closed_5_E1_1_11_0002
-2971.75	1494.22	-2.753	7.004	Q1_closed_5_E1_2_11_0001
-2977.98	103.479	-6.475	3.588	Q1_closed_5_E1_2_11_0002
-2985.12	747.2	-10.382	5.906	Q1_closed_5_E1_3_11_0001
-2990.01	74.117	-12.87	5.038	Q1_closed_5_E1_3_11_0002
-2979.8	2233.69	-9.564	8.995	Q1_closed_5_E1_4_11_0001
-2967.23	253.689	-8.391	3.734	Q1_closed_5_E1_4_11_0002
-2957.85	1697.02	-3.136	7.748	Q1_closed_5_E1_5_11_0001
-2974.77	809.856	-13.758	5.487	Q1_closed_5_E1_5_11_0002
-2977.15	206.223	-10.938	5.003	Q1_closed_5_E1_6_11_0001
-2991.98	809.631	-13.969	7.39	Q1_closed_5_E1_6_11_0002
-2882.63	212.143	-11.338	3.334	Q1_closed_5_E1_7_11_0001
-2986.06	274.707	-10.447	5.572	Q1_closed_5_E1_7_11_0002
-2947.12	449.483	-6.709	4.848	Q1_closed_5_E1_8_11_0001
-2962.97	1389.14	-7.003	6.884	Q1_closed_5_E1_8_11_0002
-2984.69	680.68	-13.2	4.484	Q1_closed_5_E1_9_11_0001
-2981.4	1582.97	-5.117	6.522	Q1_closed_5_E1_9_11_0002
-2898.47	1234.68	-3.012	6.777	Q1_closed_6_E1_10_11_0001
-2922.09	134.421	-17.915	5.903	Q1_closed_6_E1_10_11_0002
-2900.62	884.416	-6.254	5.994	Q1_closed_6_E1_1_11_0001
-2932.88	92.675	-12.715	5.206	Q1_closed_6_E1_1_11_0002
-2684.61	2074.21	-6.292	6.263	Q1_closed_6_E1_2_11_0001
-2925.24	72.077	-13.483	5.697	Q1_closed_6_E1_2_11_0002
-2907.84	846.419	-12.022	8.009	Q1_closed_6_E1_3_11_0001
-2704.86	2102.19	-9.035	8.805	Q1_closed_6_E1_4_11_0001
-2894.95	60.736	-11.529	4.439	Q1_closed_6_E1_4_11_0002
-2905.39	1819.72	-6.068	7.98	Q1_closed_6_E1_5_11_0001
-2648.43	564.252	-8.275	4.578	Q1_closed_6_E1_5_11_0002
-2928.87	50.226	-14.339	4.043	Q1_closed_6_E1_6_11_0001
-2903.43	368.573	-6.336	4.013	Q1_closed_6_E1_6_11_0002
-2928.24	182.304	-14.223	4.575	Q1_closed_6_E1_7_11_0001
-2904.56	571.064	-11.013	4.644	Q1_closed_6_E1_7_11_0002
-2890.57	768.374	-7.187	11.389	Q1_closed_6_E1_8_11_0001
-2897.25	239.822	-7.15	4.02	Q1_closed_6_E1_8_11_0002
-2901.79	267.692	-9.449	3.924	Q1_closed_6_E1_9_11_0001
-2924.53	316.115	-10.969	5.448	Q1_closed_6_E1_9_11_0002
-2934.42	2324.53	-6.051	9.175	Q1_closed_7_E1_10_11_0001
-2944.84	680.622	-8.005	7.186	Q1_closed_7_E1_10_11_0002
-2904.39	107.614	-11.845	5.227	Q1_closed_7_E1_1_11_0001
-2918.42	260.968	-13.081	4.092	Q1_closed_7_E1_1_11_0002
-2920.79	836.282	-6.355	5.256	Q1_closed_7_E1_2_11_0001
-2695.56	780.684	-13.027	5.393	Q1_closed_7_E1_2_11_0002
-2937.15	1299.85	-7.195	7.012	Q1_closed_7_E1_3_11_0001
-2945.74	861.411	-7.893	6.133	Q1_closed_7_E1_3_11_0002
-2955.05	49.001	-17.469	5.067	Q1_closed_7_E1_4_11_0001
-2937.17	1265.67	-2.695	6.434	Q1_closed_7_E1_4_11_0002
-2921.78	398.092	-9.266	5.746	Q1_closed_7_E1_5_11_0001
-2908.28	119.352	-14.136	3.189	Q1_closed_7_E1_5_11_0002
-2925.09	67.947	-12.536	2.752	Q1_closed_7_E1_6_11_0001
-2945.11	396.413	-16.329	5.852	Q1_closed_7_E1_6_11_0002
-2919.34	4861.5	-3.602	12.575	Q1_closed_7_E1_7_11_0001
-2938.24	961.22	-10.308	5.632	Q1_closed_7_E1_7_11_0002
-2926.32	134.289	-7.101	3.777	Q1_closed_7_E1_8_11_0001
-2943.58	69.603	-15.965	4.043	Q1_closed_7_E1_8_11_0002
-2919.97	268.512	-6.714	3.909	Q1_closed_7_E1_9_11_0001
-2918.12	210.012	-6.765	5.076	Q1_closed_7_E1_9_11_0002
-2939.11	244.737	-8.288	4.014	Q1_closed_8_E1_10_11_0001
-2933.83	1242.27	-8.963	5.4	Q1_closed_8_E1_10_11_0002
-2939.74	326.762	-10.665	4.08	Q1_closed_8_E1_1_11_0001
-2933.3	260.49	-9.697	3.477	Q1_closed_8_E1_1_11_0002
-2956.66	676.892	-6.999	7.499	Q1_closed_8_E1_2_11_0001
-2950.72	243.529	-5.254	4.841	Q1_closed_8_E1_2_11_0002
-2971.7	52.75	-16.95	4.833	Q1_closed_8_E1_3_11_0001
-2937.51	829.348	-7.786	6.564	Q1_closed_8_E1_3_11_0002
-2966.53	58.907	-19.661	5.175	Q1_closed_8_E1_4_11_0001
-2968.84	68.468	-14.61	5.454	Q1_closed_8_E1_4_11_0002
-2955.32	1117.02	-3.492	5.393	Q1_closed_8_E1_5_11_0001
-2948.94	1320.91	-7.144	7.718	Q1_closed_8_E1_5_11_0002
-2935.57	1263.31	-5.308	6.402	Q1_closed_8_E1_6_11_0001
-2949.51	963.215	-9.024	6.184	Q1_closed_8_E1_6_11_0002
-2746.55	443.505	-9.899	3.436	Q1_closed_8_E1_7_11_0001
-2791.96	668.303	-10.156	4.589	Q1_closed_8_E1_7_11_0002
-2840.05	390.899	-7.851	3.074	Q1_closed_8_E1_8_11_0001
-2924.93	2536.98	-11.091	8.457	Q1_closed_8_E1_8_11_0002
-2950.31	862.71	-22.823	6.963	Q1_closed_8_E1_9_11_0001
-2876.23	414.416	-8.015	5.084	Q1_closed_8_E1_9_11_0002
-2910.64	956.19	-6.02	6.304	Q1_closed_9_E1_10_11_0001
-2917.87	325.972	-10.392	4.151	Q1_closed_9_E1_10_11_0002
-2941.82	642.825	-6.772	7.34	Q1_closed_9_E1_1_11_0001
-2917.55	1152.71	-4.731	5.517	Q1_closed_9_E1_1_11_0002
-2948.64	179.427	-15.714	5.609	Q1_closed_9_E1_2_11_0001
-2921.06	330.707	-10.68	5.365	Q1_closed_9_E1_2_11_0002
-2973.72	954.168	-6.702	5.664	Q1_closed_9_E1_3_11_0001
-2956.59	104.123	-23.723	5.582	Q1_closed_9_E1_3_11_0002
-2949.4	377.269	-7.358	4.895	Q1_closed_9_E1_4_11_0001
-2915.25	997.702	-4.568	5.582	Q1_closed_9_E1_4_11_0002
-2917.11	327.568	-12.032	3.539	Q1_closed_9_E1_5_11_0001
-2947.38	985.276	-12.49	6.254	Q1_closed_9_E1_5_11_0002
-2902.87	2926.86	-4.639	9.495	Q1_closed_9_E1_6_11_0001
-2918.1	1577.19	-5.327	7.488	Q1_closed_9_E1_6_11_0002
-2918.14	277.16	-16.269	4.07	Q1_closed_9_E1_7_11_0001
-2954.44	371.206	-11.452	3.432	Q1_closed_9_E1_7_11_0002
-2938.73	1822.56	-4.834	7.055	Q1_closed_9_E1_8_11_0001
-2916.88	380.029	-10.615	3.286	Q1_closed_9_E1_8_11_0002
-2925.27	1627.4	-8.692	9.319	Q1_closed_9_E1_9_11_0001
-2917.02	829.056	-7.942	4.66	Q1_closed_9_E1_9_11_0002
-2899.85	1882.49	-8.969	6.058	Q1_closed_10_E1_10_12_0001
-2911.62	262.405	-9.698	5.61	Q1_closed_10_E1_10_12_0002
-2886.74	42.861	-14.021	3.448	Q1_closed_10_E1_1_12_0001
-2883.16	1207.74	-1.686	6.852	Q1_closed_10_E1_1_12_0002
-2831.39	396.671	-10.062	5.573	Q1_closed_10_E1_2_12_0001
-2916.88	1170.92	-10.609	6.129	Q1_closed_10_E1_2_12_0002
-2923.12	92.663	-16.959	4.6	Q1_closed_10_E1_3_12_0001
-2925.57	157.829	-19.484	5.481	Q1_closed_10_E1_3_12_0002
-2923.52	910.119	-17.28	6.215	Q1_closed_10_E1_4_12_0001
-2922.95	2417.19	-17.333	9.077	Q1_closed_10_E1_4_12_0002
-2873.97	191.679	-8.439	2.122	Q1_closed_10_E1_5_12_0001
-2876.09	363.302	-7.997	5.1	Q1_closed_10_E1_5_12_0002
-2917.13	1257.56	-16.648	6.814	Q1_closed_10_E1_6_12_0001
-2892.37	936.988	-3.918	5.268	Q1_closed_10_E1_6_12_0002
-2913.64	480.81	-16.86	7.609	Q1_closed_10_E1_7_12_0001
-1923.29	2161.33	-5.472	8.112	Q1_closed_10_E1_7_12_0002
-2907.41	173.007	-11.417	4.633	Q1_closed_10_E1_8_12_0001
-2914.89	145.811	-8.911	4.875	Q1_closed_10_E1_8_12_0002
-2923.58	136.916	-23.412	3.646	Q1_closed_10_E1_9_12_0001
-2869.47	1036.67	-7.669	6.088	Q1_closed_10_E1_9_12_0002
-2900.56	186.31	-6.473	3.561	Q1_closed_11_E1_10_12_0001
-2914.27	291.096	-21.556	3.72	Q1_closed_11_E1_10_12_0002
-2924.79	1002.47	-12.418	7.054	Q1_closed_11_E1_1_12_0001
-2903.14	322.299	-13.005	4.264	Q1_closed_11_E1_1_12_0002
-2877.03	109.646	-9.447	4.19	Q1_closed_11_E1_2_12_0001
-2912.23	314.518	-5.807	5.047	Q1_closed_11_E1_2_12_0002
-2755.39	692.834	-12.514	4.778	Q1_closed_11_E1_3_12_0001
-2923.82	1376.67	-9.545	5.184	Q1_closed_11_E1_3_12_0002
-2892.07	580.593	-12.747	5.995	Q1_closed_11_E1_4_12_0001
-2890.1	1547.61	-5.299	8.527	Q1_closed_11_E1_4_12_0002
-2914.39	160.764	-12.501	7.078	Q1_closed_11_E1_5_12_0001
-2901.16	55.85	-11.308	2.922	Q1_closed_11_E1_5_12_0002
-2923.85	717.201	-4.279	6.886	Q1_closed_11_E1_6_12_0001
-2924.32	698.886	-11.027	6.138	Q1_closed_11_E1_6_12_0002
-2623.34	938.321	-2.001	5.375	Q1_closed_11_E1_7_12_0001
-2874.39	304.653	-5.7	4.406	Q1_closed_11_E1_7_12_0002
-2898.29	495.064	-9.224	4.419	Q1_closed_11_E1_8_12_0001
-2889.64	249.186	-7.425	3.964	Q1_closed_11_E1_8_12_0002
-2907.13	365.064	-14.837	3.498	Q1_closed_11_E1_9_12_0001
-2916.16	214.01	-10.883	7.065	Q1_closed_11_E1_9_12_0002
-2925.31	615.637	-2.532	9.478	Q1_closed_12_E1_10_12_0001
-2927.16	1051.59	-7.289	5.797	Q1_closed_12_E1_10_12_0002
-2910.99	1688.12	-2.5	8.607	Q1_closed_12_E1_1_12_0001
-2914.23	85.413	-5.331	3.429	Q1_closed_12_E1_1_12_0002
-2941.34	109.235	-9.688	5.363	Q1_closed_12_E1_2_12_0001
-2947.18	535.641	-14.641	6.358	Q1_closed_12_E1_2_12_0002
-2896.86	1102.19	-8.285	4.82	Q1_closed_12_E1_3_12_0001
-2038.52	590.388	-5.531	4.67	Q1_closed_12_E1_3_12_0002
-2930.02	330.638	-9.023	5.431	Q1_closed_12_E1_4_12_0001
-2932.33	70.222	-13.575	2.91	Q1_closed_12_E1_4_12_0002
-2930.82	950.117	-9.555	7.132	Q1_closed_12_E1_5_12_0001
-2918.96	945.384	-5.353	6.008	Q1_closed_12_E1_5_12_0002
-2930.44	338.773	-14.885	3.926	Q1_closed_12_E1_6_12_0001
-2944.51	311.196	-13.745	5.988	Q1_closed_12_E1_6_12_0002
-2935.36	938.313	-6.904	6.347	Q1_closed_12_E1_7_12_0001
-2936.66	195.033	-6.572	4.242	Q1_closed_12_E1_7_12_0002
-2915	277.5	-10.547	3.276	Q1_closed_12_E1_8_12_0001
-2920.96	778.816	-9.694	7.022	Q1_closed_12_E1_8_12_0002
-2934.05	1103.13	-6.662	9.055	Q1_closed_12_E1_9_12_0001
-2925.03	613.778	-9.786	4.094	Q1_closed_12_E1_9_12_0002
-2956.15	764.575	-5.684	6.93	Q1_closed_13_E1_10_12_0001
-2938.7	247.735	-13.746	3.065	Q1_closed_13_E1_10_12_0002
-2901.74	591.295	-9.815	7.532	Q1_closed_13_E1_1_12_0001
-2959.74	159.757	-14.258	6.513	Q1_closed_13_E1_1_12_0002
-2977.51	85.483	-16.016	4.311	Q1_closed_13_E1_2_12_0001
-2962.01	961.314	-14.67	5.893	Q1_closed_13_E1_2_12_0002
-2939.33	932.745	-8.19	6.115	Q1_closed_13_E1_3_12_0001
-2938.21	637.68	-7.022	4.861	Q1_closed_13_E1_3_12_0002
-2938.59	1074.33	-15.569	4.318	Q1_closed_13_E1_4_12_0001
-2958.13	51.383	-14.226	4.349	Q1_closed_13_E1_4_12_0002
-2928.61	225.915	-9.986	3.307	Q1_closed_13_E1_5_12_0001
-2441.25	1195.08	-5.949	5.53	Q1_closed_13_E1_5_12_0002
-2971.26	770.112	-12.562	4.307	Q1_closed_13_E1_6_12_0001
-2929.24	780.309	-3.854	5.211	Q1_closed_13_E1_6_12_0002
-2956.19	222.049	-8.46	4.662	Q1_closed_13_E1_7_12_0001
-2956.94	897.822	-5.547	6.909	Q1_closed_13_E1_7_12_0002
-2934.52	1666.94	-6.009	6.6	Q1_closed_13_E1_8_12_0001
-2930.47	1686.18	-3.52	6.061	Q1_closed_13_E1_8_12_0002
-2889.65	376.305	-13.504	2.475	Q1_closed_13_E1_9_12_0001
-2955.59	1472.39	-4.535	6.545	Q1_closed_13_E1_9_12_0002
-2922.85	149.001	-17.45	4.89	Q1_closed_14_E1_10_12_0001
-2884.12	1071.78	-9.721	5.89	Q1_closed_14_E1_10_12_0002
-2914.98	310.206	-6.487	6.402	Q1_closed_14_E1_1_12_0001
-2925.68	880.382	-7.431	7.345	Q1_closed_14_E1_1_12_0002
-2477.51	913.273	-16.818	7.91	Q1_closed_14_E1_2_12_0001
-2891.64	2175.05	-5.249	7.48	Q1_closed_14_E1_2_12_0002
-2903	177.16	-7.692	3.71	Q1_closed_14_E1_3_12_0001
-2903.26	1445.21	-11.725	6.716	Q1_closed_14_E1_3_12_0002
-2897.49	866.833	-12.155	4.466	Q1_closed_14_E1_4_12_0001
-2926.31	738.306	-8.715	8.98	Q1_closed_14_E1_4_12_0002
-2917.74	664.378	-8.136	5.343	Q1_closed_14_E1_5_12_0001
-2893.74	244.383	-9.192	3.454	Q1_closed_14_E1_5_12_0002
-2921.03	59.852	-16.923	4.366	Q1_closed_14_E1_6_12_0001
-2929.65	667.343	-4.93	5.313	Q1_closed_14_E1_6_12_0002
-2923.17	1957.63	-11.76	7.205	Q1_closed_14_E1_7_12_0001
-2906.83	4351.86	-9.919	14.085	Q1_closed_14_E1_7_12_0002
-2925.94	957.342	-10.394	8.009	Q1_closed_14_E1_8_12_0001
-2918.2	137.669	-8.42	4.414	Q1_closed_14_E1_8_12_0002
-2917.95	236.704	-10.645	5.549	Q1_closed_14_E1_9_12_0001
-2893.34	1516.85	-5.363	6.479	Q1_closed_14_E1_9_12_0002
-2928.73	4545.74	-1.531	9.02	Q1_closed_15_E1_10_12_0001
-2958.35	207.982	-6.885	5.641	Q1_closed_15_E1_10_12_0002
-2962.99	937.515	-10.119	6.486	Q1_closed_15_E1_1_12_0001
-2965.26	84.116	-12.193	4.952	Q1_closed_15_E1_1_12_0002
-2936.44	876.518	-10.758	7.214	Q1_closed_15_E1_2_12_0001
-2928.94	379.888	-5.832	4.494	Q1_closed_15_E1_2_12_0002
-2903.79	1122.49	-12.789	5.303	Q1_closed_15_E1_3_12_0001
-2962.99	433.413	-8.551	7.838	Q1_closed_15_E1_3_12_0002
-2939.67	283.623	-19.688	3.886	Q1_closed_15_E1_4_12_0001
-2974.02	312.062	-9.954	2.813	Q1_closed_15_E1_4_12_0002
-2976.04	1362.43	-7.476	7.244	Q1_closed_15_E1_5_12_0001
-2964.6	566.478	-9.581	5.839	Q1_closed_15_E1_5_12_0002
-2969.43	239.01	-10.944	5.345	Q1_closed_15_E1_6_12_0001
-2970.81	60.575	-15.226	4.88	Q1_closed_15_E1_6_12_0002
-2931.61	324.014	-11.205	3.002	Q1_closed_15_E1_7_12_0001
-2971.82	415.593	-18.699	7.029	Q1_closed_15_E1_7_12_0002
-2856.47	498.279	-1.816	3.091	Q1_closed_15_E1_8_12_0001
-2936.36	300.293	-14.11	4.028	Q1_closed_15_E1_8_12_0002
-2967.66	236.602	-11.055	5.404	Q1_closed_15_E1_9_12_0001
-2969.98	147.166	-14.778	5.305	Q1_closed_15_E1_9_12_0002
-2991.79	461.028	-8.008	5.118	Q1_closed_16_E1_10_12_0001
-3009.5	457.505	-5.089	7.687	Q1_closed_16_E1_10_12_0002
-2990.5	1287.21	-4.889	6.027	Q1_closed_16_E1_1_12_0001
-3021.18	61.132	-22.773	5.07	Q1_closed_16_E1_1_12_0002
-2996.01	278.602	-19.573	3.925	Q1_closed_16_E1_2_12_0001
-2853.88	439.208	-7.114	4.393	Q1_closed_16_E1_2_12_0002
-2964.35	416.064	-7.118	5.122	Q1_closed_16_E1_3_12_0001
-3023.32	46.382	-22.78	5.093	Q1_closed_16_E1_3_12_0002
-2981.27	328.869	-11.194	4.127	Q1_closed_16_E1_4_12_0001
-2992.53	1841.85	-1.977	9.607	Q1_closed_16_E1_4_12_0002
-3007.2	198.727	-7.565	4.821	Q1_closed_16_E1_5_12_0001
-3010.26	1472.97	-6.895	7.063	Q1_closed_16_E1_5_12_0002
-2929.55	354.619	-19.298	2.233	Q1_closed_16_E1_6_12_0001
-3003.8	87.209	-8.149	3.529	Q1_closed_16_E1_6_12_0002
-3012.85	216.589	-11.406	5.596	Q1_closed_16_E1_7_12_0001
-3002.37	213.005	-10.087	4.966	Q1_closed_16_E1_7_12_0002
-3005.44	994.846	-5.298	6.371	Q1_closed_16_E1_8_12_0001
-2996.85	304.936	-12.01	3.773	Q1_closed_16_E1_8_12_0002
-3026.04	220.703	-10.961	3.186	Q1_closed_16_E1_9_12_0001
-3005.63	1886.81	-7.057	7.156	Q1_closed_16_E1_9_12_0002
-2938.01	442.036	-16.753	3.172	Q1_closed_17_E1_10_12_0001
-2939.92	1819.39	-6.755	6.135	Q1_closed_17_E1_10_12_0002
-2964.83	222.317	-8.497	4.703	Q1_closed_17_E1_1_12_0001
-2952.94	356.729	-7.154	4.248	Q1_closed_17_E1_1_12_0002
-2958.69	267.451	-10.33	3.217	Q1_closed_17_E1_2_12_0001
-2983.18	1143.12	-8.94	10.182	Q1_closed_17_E1_2_12_0002
-2893.09	248.79	-6.112	5.349	Q1_closed_17_E1_3_12_0001
-2955.32	881.872	-11.725	5.502	Q1_closed_17_E1_3_12_0002
-2980.4	1016.41	-10.11	7.607	Q1_closed_17_E1_4_12_0001
-2984.94	264.977	-6.787	6.003	Q1_closed_17_E1_4_12_0002
-2977.26	250.102	-4.761	4.353	Q1_closed_17_E1_5_12_0001
-2954.78	1344.89	-10.35	5.492	Q1_closed_17_E1_5_12_0002
-2981.18	344.204	-10.188	6.476	Q1_closed_17_E1_6_12_0001
-2986.93	260.586	-8.281	4.03	Q1_closed_17_E1_6_12_0002
-2969.11	140.362	-7.126	4.292	Q1_closed_17_E1_7_12_0001
-2980.96	733.586	-7.053	7.291	Q1_closed_17_E1_7_12_0002
-2983.24	1402.78	-9.621	7.764	Q1_closed_17_E1_8_12_0001
-2954.86	266.607	-14.012	3.806	Q1_closed_17_E1_8_12_0002
-2957.73	706.356	-14.148	4.267	Q1_closed_17_E1_9_12_0001
-2968.66	270.477	-11.695	4.941	Q1_closed_17_E1_9_12_0002
-2897.75	58.989	-16.988	1.116	Q1_closed_18_E1_10_12_0001
-2883.38	2661.85	-8.989	9.681	Q1_closed_18_E1_10_12_0002
-2918.68	444.844	-9.748	5.55	Q1_closed_18_E1_1_12_0001
-2903.01	208.18	-11.516	5.637	Q1_closed_18_E1_1_12_0002
-2910.28	83.415	-9.102	3.709	Q1_closed_18_E1_2_12_0001
-2916.65	65.238	-12.243	4.79	Q1_closed_18_E1_2_12_0002
-2919.7	1369.88	-10.544	8.085	Q1_closed_18_E1_3_12_0001
-2924.55	68.169	-14.651	4.666	Q1_closed_18_E1_3_12_0002
-2928.02	50.885	-16.207	4.643	Q1_closed_18_E1_4_12_0001
-2902.84	2240.14	-3.103	9.997	Q1_closed_18_E1_4_12_0002
-2920.79	1811.05	-11.601	7.977	Q1_closed_18_E1_5_12_0001
-2922.57	98.591	-11.504	4.437	Q1_closed_18_E1_5_12_0002
-2667.2	3666.95	-2.983	9.188	Q1_closed_18_E1_6_12_0001
-2921.59	102.583	-13.443	4.562	Q1_closed_18_E1_6_12_0002
-2914.12	137.989	-8.722	5.589	Q1_closed_18_E1_7_12_0001
-2895.41	210.263	-6.969	5.837	Q1_closed_18_E1_7_12_0002
-2923.55	236.755	-13.29	6.623	Q1_closed_18_E1_8_12_0001
-2903.2	7240.74	-5.214	14.745	Q1_closed_18_E1_8_12_0002
-2887.15	1226.8	-10.812	7.383	Q1_closed_18_E1_9_12_0001
-2918.82	160.92	-10.773	4.512	Q1_closed_18_E1_9_12_0002
-2985.51	644.573	-8.982	4.031	Q1_closed_19_E1_10_12_0001
-3018.17	1633.37	-6.029	6.589	Q1_closed_19_E1_10_12_0002
-3017.64	188.027	-12.01	5.632	Q1_closed_19_E1_1_12_0001
-3020.84	145.136	-10.401	5.838	Q1_closed_19_E1_1_12_0002
-2976.56	52.143	-15.789	3.624	Q1_closed_19_E1_2_12_0001
-3027.47	1059.1	-14.541	6.513	Q1_closed_19_E1_2_12_0002
-2984.82	715.616	-7.725	6.719	Q1_closed_19_E1_3_12_0001
-2971.78	2476.74	-2.015	9.632	Q1_closed_19_E1_3_12_0002
-3037	1599.71	-8.649	6.76	Q1_closed_19_E1_4_12_0001
-3016.93	1158.18	-3.426	7.549	Q1_closed_19_E1_4_12_0002
-2980.52	1599.42	-4.765	6.66	Q1_closed_19_E1_5_12_0001
-3017.62	83.129	-13.012	4.711	Q1_closed_19_E1_5_12_0002
-3018.22	1347.24	-8.472	7.531	Q1_closed_19_E1_6_12_0001
-3004.01	52.384	-14.133	3.119	Q1_closed_19_E1_6_12_0002
-2976.13	1928.02	-4.648	7.764	Q1_closed_19_E1_7_12_0001
-3016.63	1632.43	-9.245	6.852	Q1_closed_19_E1_7_12_0002
-3021.06	1382.17	-12.995	9.413	Q1_closed_19_E1_8_12_0001
-2970.58	1686.75	-6.504	7.553	Q1_closed_19_E1_8_12_0002
-3011.41	145.181	-9.128	4.335	Q1_closed_19_E1_9_12_0001
-2808.27	1948.36	-7.207	8.681	Q1_closed_19_E1_9_12_0002
-2758.02	464.57	-8.562	4.461	Q1_closed_1_E1_10_12_0001
-2942.49	476.098	-7.614	4.3	Q1_closed_1_E1_10_12_0002
-2967.6	344.71	-8.056	7.018	Q1_closed_1_E1_1_12_0001
-2964.67	449.512	-6.874	7.028	Q1_closed_1_E1_1_12_0002
-2944.53	362.143	-6.444	4.357	Q1_closed_1_E1_2_12_0001
-2959.87	170.484	-8.489	3.811	Q1_closed_1_E1_2_12_0002
-2829.01	3890.57	-0.528	9.64	Q1_closed_1_E1_3_12_0001
-2968.32	619.078	-11.63	7.991	Q1_closed_1_E1_3_12_0002
-2601.66	1063.42	-4.27	9.03	Q1_closed_1_E1_4_12_0001
-2945.12	342.869	-7.412	4.371	Q1_closed_1_E1_4_12_0002
-2817.43	570.272	-6.588	4.415	Q1_closed_1_E1_5_12_0001
-2967	1444.89	-7.639	7.812	Q1_closed_1_E1_5_12_0002
-2969.19	58.431	-18.2	5.114	Q1_closed_1_E1_6_12_0001
-2937.27	1244.99	-4.92	5.251	Q1_closed_1_E1_6_12_0002
-2939.58	238.461	-7.387	3.851	Q1_closed_1_E1_7_12_0001
-2965.85	1419.4	-5.571	7.032	Q1_closed_1_E1_7_12_0002
-2915.9	3567.47	-5.362	9.899	Q1_closed_1_E1_8_12_0001
-2942.24	1606.17	-5.559	6.099	Q1_closed_1_E1_8_12_0002
-2968.48	237.823	-15.397	7.063	Q1_closed_1_E1_9_12_0001
-2936.57	285.941	-5.702	4.129	Q1_closed_1_E1_9_12_0002
-3006.8	1074.22	-10.675	6.169	Q1_closed_20_E1_10_12_0001
-2996.25	1694.16	-7.132	8.444	Q1_closed_20_E1_10_12_0002
-2958.51	222.653	-6.706	4.097	Q1_closed_20_E1_1_12_0001
-3009.88	126.365	-10.201	5.583	Q1_closed_20_E1_1_12_0002
-2984.83	208.451	-8.462	3.02	Q1_closed_20_E1_2_12_0001
-2971.17	404.276	-11.536	3.403	Q1_closed_20_E1_2_12_0002
-3016.74	88.292	-18.187	4.695	Q1_closed_20_E1_3_12_0001
-2974.4	2002.51	-3.058	7.832	Q1_closed_20_E1_3_12_0002
-2998.22	1728.56	-10.608	8.466	Q1_closed_20_E1_4_12_0001
-3006.43	1392.51	-6.372	6.649	Q1_closed_20_E1_4_12_0002
-2978.79	267.165	-8.578	3.912	Q1_closed_20_E1_5_12_0001
-2988.72	1097.27	-12.097	10.244	Q1_closed_20_E1_5_12_0002
-2983.9	65.384	-18.391	3.387	Q1_closed_20_E1_6_12_0001
-2987.18	178.766	-11.784	4.049	Q1_closed_20_E1_6_12_0002
-2914.18	954.319	-9.445	3.423	Q1_closed_20_E1_7_12_0001
-2984.64	1093.41	-11.326	5.461	Q1_closed_20_E1_7_12_0002
-3002.71	794.92	-9.894	4.04	Q1_closed_20_E1_8_12_0001
-2978.78	228.001	-9.776	3.86	Q1_closed_20_E1_8_12_0002
-2993.01	1542.46	-7.531	6.071	Q1_closed_20_E1_9_12_0001
-2998.47	169.845	-10.963	4.098	Q1_closed_20_E1_9_12_0002
-2998.85	504.329	-17.088	3.045	Q1_closed_2_E1_10_12_0001
-2973.76	208.181	-12.336	6.269	Q1_closed_2_E1_10_12_0002
-2786.76	59.408	-16.652	3.769	Q1_closed_2_E1_1_12_0001
-2995.83	1627.93	-3.606	6.243	Q1_closed_2_E1_1_12_0002
-2943.2	1495.53	-6.939	6.142	Q1_closed_2_E1_2_12_0001
-2949.94	998.937	-6.431	6.365	Q1_closed_2_E1_2_12_0002
-2988.5	263.508	-11.796	4.266	Q1_closed_2_E1_3_12_0001
-2950.85	282.009	-6.945	4.921	Q1_closed_2_E1_3_12_0002
-2948.9	1139.13	-2.995	5.428	Q1_closed_2_E1_4_12_0001
-2953.48	375.084	-14.683	3.838	Q1_closed_2_E1_4_12_0002
-2969.38	1607.43	-3.794	7.155	Q1_closed_2_E1_5_12_0001
-3016.3	748.821	-13.518	3.782	Q1_closed_2_E1_5_12_0002
-2979.45	766.615	-11.777	5.932	Q1_closed_2_E1_6_12_0001
-2977.07	733.055	-11.135	5.542	Q1_closed_2_E1_6_12_0002
-2751.98	169.337	-8.108	4.847	Q1_closed_2_E1_7_12_0001
-2968.07	150.114	-7.589	4.119	Q1_closed_2_E1_7_12_0002
-2970.14	1107.99	-10.172	8.312	Q1_closed_2_E1_8_12_0001
-2967.54	549.732	-6.039	5.132	Q1_closed_2_E1_8_12_0002
-2987.77	1164.81	-5.661	4.804	Q1_closed_2_E1_9_12_0001
-2941.2	2336.11	-3.704	7.471	Q1_closed_2_E1_9_12_0002
-2951.82	1578.45	-3.579	6.588	Q1_closed_3_E1_10_12_0001
-2980.39	1285.69	-9.489	4.594	Q1_closed_3_E1_10_12_0002
-2954.94	764.72	-8.633	11.686	Q1_closed_3_E1_1_12_0001
-2956.07	1293.86	-5.932	5.307	Q1_closed_3_E1_1_12_0002
-2955.96	667.756	-8.345	8.56	Q1_closed_3_E1_2_12_0001
-2988.41	733.674	-15.439	7.332	Q1_closed_3_E1_2_12_0002
-2935.06	126.9	-14.841	4.5	Q1_closed_3_E1_3_12_0001
-2967.53	392.655	-3.619	4.948	Q1_closed_3_E1_3_12_0002
-2972.55	540.643	-10.857	4.846	Q1_closed_3_E1_4_12_0001
-2985.97	51.283	-9.97	4.417	Q1_closed_3_E1_4_12_0002
-2720.9	28926.7	-4.367	20.814	Q1_closed_3_E1_5_12_0001
-2935.03	355.537	-9.448	4.324	Q1_closed_3_E1_5_12_0002
-2958.69	746.288	-6.626	6.761	Q1_closed_3_E1_6_12_0001
-2958.02	1051.93	-5.308	6.269	Q1_closed_3_E1_6_12_0002
-2981.97	1502.05	-7.746	7.332	Q1_closed_3_E1_7_12_0001
-2943.2	105.231	-6.048	4.305	Q1_closed_3_E1_7_12_0002
-2983.01	126.83	-7.991	4.547	Q1_closed_3_E1_8_12_0001
-2955.65	226.262	-13.429	3.194	Q1_closed_3_E1_8_12_0002
-2958.14	1112.71	-7.705	4.834	Q1_closed_3_E1_9_12_0001
-2965	199.971	-16.739	5.17	Q1_closed_3_E1_9_12_0002
-2878.16	665.626	-16.449	3.965	Q1_closed_4_E1_10_12_0001
-2930.62	210.799	-10.324	5.953	Q1_closed_4_E1_10_12_0002
-2945.82	319.284	-7.762	4.46	Q1_closed_4_E1_1_12_0001
-2933.25	789.262	-13.015	5.189	Q1_closed_4_E1_1_12_0002
-2950.68	611.346	-12.773	5.522	Q1_closed_4_E1_2_12_0001
-2943.34	1789.25	-7.334	6.938	Q1_closed_4_E1_2_12_0002
-2976.2	824.203	-18.092	5.946	Q1_closed_4_E1_3_12_0001
-2934.66	321.714	-17.03	3.766	Q1_closed_4_E1_3_12_0002
-2788.86	1015.69	-10.803	4.702	Q1_closed_4_E1_4_12_0001
-2949.22	85.638	-6.573	3.66	Q1_closed_4_E1_4_12_0002
-2923.85	311.658	-18.99	2.839	Q1_closed_4_E1_5_12_0001
-2950.97	195.943	-8.32	6.415	Q1_closed_4_E1_5_12_0002
-2957.03	107.817	-8.378	4.407	Q1_closed_4_E1_6_12_0001
-2953.01	4809.89	-6.929	11.234	Q1_closed_4_E1_6_12_0002
-2936.68	1918.12	-11.214	7.497	Q1_closed_4_E1_7_12_0001
-2927.43	215.006	-13.525	5.167	Q1_closed_4_E1_7_12_0002
-2930.71	219.886	-12.301	3.154	Q1_closed_4_E1_8_12_0001
-2952.4	440.095	-9.403	7.363	Q1_closed_4_E1_8_12_0002
-2944.49	332.044	-8.381	4.345	Q1_closed_4_E1_9_12_0001
-2929.83	4692.49	-4.759	9.533	Q1_closed_4_E1_9_12_0002
-2967.84	88.861	-21.712	1.089	Q1_closed_5_E1_10_12_0001
-2951.95	1005.9	-5.206	6.755	Q1_closed_5_E1_10_12_0002
-2964.64	1251.47	-16.445	6.761	Q1_closed_5_E1_1_12_0001
-2980.82	1374.27	-9.815	5.791	Q1_closed_5_E1_1_12_0002
-2972.48	938.624	-12.099	9.307	Q1_closed_5_E1_2_12_0001
-2982.89	5838.31	-6.632	13.336	Q1_closed_5_E1_2_12_0002
-2999.12	83.323	-23.275	4.802	Q1_closed_5_E1_3_12_0001
-2969.59	254.451	-11.567	3.82	Q1_closed_5_E1_3_12_0002
-2984.42	160.679	-15.167	5.742	Q1_closed_5_E1_4_12_0001
-2983.06	1386.55	-1.009	6.683	Q1_closed_5_E1_4_12_0002
-2980.79	169.574	-7.673	5.179	Q1_closed_5_E1_5_12_0001
-2982.59	345.314	-5.404	5.195	Q1_closed_5_E1_5_12_0002
-2969.71	376.744	-11.794	4.516	Q1_closed_5_E1_6_12_0001
-2967.69	1395.69	-7.384	5.682	Q1_closed_5_E1_6_12_0002
-2986.46	2015.48	-6.301	11.448	Q1_closed_5_E1_7_12_0001
-2985.89	1062.94	-11.389	7.584	Q1_closed_5_E1_7_12_0002
-2989.76	307.741	-11.099	5.746	Q1_closed_5_E1_8_12_0001
-2975.08	830.364	-12.792	5.471	Q1_closed_5_E1_8_12_0002
-2959.94	1608.75	-3.217	6.546	Q1_closed_5_E1_9_12_0001
-2988.72	1039.22	-14.259	7.707	Q1_closed_5_E1_9_12_0002
-2908.46	769.728	-4.886	6.442	Q1_closed_6_E1_10_12_0001
-2904.32	213.972	-8.226	5.277	Q1_closed_6_E1_10_12_0002
-2937.85	85.756	-17.025	5.708	Q1_closed_6_E1_1_12_0001
-1768	1680.38	-3.591	6.997	Q1_closed_6_E1_1_12_0002
-2879.44	107.259	-12.484	2.989	Q1_closed_6_E1_2_12_0001
-2931.17	1266.88	-9.927	7.919	Q1_closed_6_E1_2_12_0002
-2879.41	122.078	-6.671	5.235	Q1_closed_6_E1_3_12_0001
-2892.76	447.456	-5.874	5.434	Q1_closed_6_E1_3_12_0002
-2908.54	409.519	-4.398	4.547	Q1_closed_6_E1_4_12_0001
-2880.25	1310.15	-6.981	9.24	Q1_closed_6_E1_4_12_0002
-2939.44	194.36	-21.565	6.689	Q1_closed_6_E1_5_12_0001
-2930.31	1464.12	-11.033	7.223	Q1_closed_6_E1_5_12_0002
-2927.33	1536.21	-5.007	9.139	Q1_closed_6_E1_6_12_0001
-2908.55	75.364	-5.43	2.629	Q1_closed_6_E1_6_12_0002
-2901.99	1938.07	-2.848	6.698	Q1_closed_6_E1_7_12_0001
-2900.89	1648.11	-5.802	6.051	Q1_closed_6_E1_7_12_0002
-2544.63	2211.28	-0.527	7.892	Q1_closed_6_E1_8_12_0001
-2938.22	233.363	-22.184	6.543	Q1_closed_6_E1_8_12_0002
-2902.86	1555.7	-5.96	5.971	Q1_closed_6_E1_9_12_0001
-2895.65	220.379	-5.756	3.703	Q1_closed_6_E1_9_12_0002
-2939.93	242.665	-10.173	5.697	Q1_closed_7_E1_10_12_0001
-2912.39	475.676	-3.459	5.321	Q1_closed_7_E1_10_12_0002
-2942.76	320.662	-10.451	5.72	Q1_closed_7_E1_1_12_0001
-2940.01	292.114	-9.152	5.953	Q1_closed_7_E1_1_12_0002
-2648.44	1171.53	-10.113	6.611	Q1_closed_7_E1_2_12_0001
-2938.32	672.55	-11.914	4.573	Q1_closed_7_E1_2_12_0002
-2947.53	1245.57	-12.936	6.977	Q1_closed_7_E1_3_12_0001
-2925.49	290.591	-17.82	4.643	Q1_closed_7_E1_3_12_0002
-2730.77	350.045	-12.393	2.396	Q1_closed_7_E1_4_12_0001
-2944.35	1178.12	-3.488	6.223	Q1_closed_7_E1_4_12_0002
-2947.47	618.717	-8.324	7.149	Q1_closed_7_E1_5_12_0001
-2924.04	366.52	-7.763	4.386	Q1_closed_7_E1_5_12_0002
-2939.14	566.025	-13.138	5.315	Q1_closed_7_E1_6_12_0001
-2917.73	396.908	-11.073	3.537	Q1_closed_7_E1_6_12_0002
-2921.7	1635.79	-4.531	5.902	Q1_closed_7_E1_7_12_0001
-2926.14	3304.74	-9.709	7.893	Q1_closed_7_E1_7_12_0002
-2919.97	1140.75	-4.006	5.057	Q1_closed_7_E1_8_12_0001
-2939.67	751.886	-8.627	7.854	Q1_closed_7_E1_8_12_0002
-2913.61	113.281	-15.649	2.42	Q1_closed_7_E1_9_12_0001
-2917.36	993.959	-11.831	6.512	Q1_closed_7_E1_9_12_0002
-2935.88	615.839	-11.839	6.299	Q1_closed_8_E1_10_12_0001
-2937.53	444.717	-4.292	4.799	Q1_closed_8_E1_10_12_0002
-2951.15	1463.47	-4.69	7.028	Q1_closed_8_E1_1_12_0001
-2952.05	79.284	-14.035	3.651	Q1_closed_8_E1_1_12_0002
-2599.31	3949.51	-1.816	9.504	Q1_closed_8_E1_2_12_0001
-2966.72	565.675	-13.815	5.116	Q1_closed_8_E1_2_12_0002
-2967.92	37.455	-16.882	4.475	Q1_closed_8_E1_3_12_0001
-2932.93	272.341	-10.933	3.261	Q1_closed_8_E1_3_12_0002
-2435.55	869.129	-6.096	3.926	Q1_closed_8_E1_4_12_0001
-2931.46	1168.38	-3.548	5.519	Q1_closed_8_E1_4_12_0002
-2930.23	1151.59	-4.738	6.065	Q1_closed_8_E1_5_12_0001
-2960.6	245.03	-13.51	5.185	Q1_closed_8_E1_5_12_0002
-2937.88	311.306	-11.898	3.753	Q1_closed_8_E1_6_12_0001
-2974.06	70.443	-21.923	5.228	Q1_closed_8_E1_6_12_0002
-2949.18	689.4	-10.621	5.463	Q1_closed_8_E1_7_12_0001
-2917.46	185.174	-6.172	4.572	Q1_closed_8_E1_7_12_0002
-2966.15	93.05	-17.577	5.176	Q1_closed_8_E1_8_12_0001
-2937.29	2663.16	-5.357	8.241	Q1_closed_8_E1_8_12_0002
-2932.08	1564.37	-4.769	6.371	Q1_closed_8_E1_9_12_0001
-2956.23	1584.93	-3.368	6.608	Q1_closed_8_E1_9_12_0002
-2951.03	238.003	-11.373	3.324	Q1_closed_9_E1_10_12_0001
-2916.18	382.672	-7.509	5.251	Q1_closed_9_E1_10_12_0002
-2944.78	614.903	-10.138	6.272	Q1_closed_9_E1_1_12_0001
-2945.15	156.339	-12.085	5.781	Q1_closed_9_E1_1_12_0002
-2900.07	897.103	-5.926	7.415	Q1_closed_9_E1_2_12_0001
-2923.58	266.552	-16.777	3.803	Q1_closed_9_E1_2_12_0002
-2947.72	1074.61	-11.389	6.187	Q1_closed_9_E1_3_12_0001
-2943.77	425.646	-10.556	7.218	Q1_closed_9_E1_3_12_0002
-2952.4	59.179	-16.188	5.112	Q1_closed_9_E1_4_12_0001
-2910.49	1198.34	-6.619	5.915	Q1_closed_9_E1_4_12_0002
-2821.59	1773.23	-3.846	7.953	Q1_closed_9_E1_5_12_0001
-2934.02	345.353	-6.893	5.723	Q1_closed_9_E1_5_12_0002
-2480.24	82.963	-15.108	5.255	Q1_closed_9_E1_6_12_0001
-2946.35	355.344	-14.904	5.464	Q1_closed_9_E1_6_12_0002
-2891.76	1403.65	-6.405	5.928	Q1_closed_9_E1_7_12_0001
-2917.98	1233.79	-4.175	6.696	Q1_closed_9_E1_7_12_0002
-2921.38	129.844	-6.916	5.689	Q1_closed_9_E1_8_12_0001
-2913.82	1238.5	-5.857	5.969	Q1_closed_9_E1_8_12_0002
-2949.37	872.131	-9.719	5.273	Q1_closed_9_E1_9_12_0001
-2918.3	249.586	-12.477	3.243	Q1_closed_9_E1_9_12_0002
-2873.23	79.128	-8.054	4.644	Q1_closed_10_E1_10_13_0001
-2928.01	196.25	-19.545	7.147	Q1_closed_10_E1_10_13_0002
-2907.97	1128.13	-10.607	4.906	Q1_closed_10_E1_1_13_0001
-2911.9	207.524	-11.723	4.696	Q1_closed_10_E1_1_13_0002
-2867.71	117.17	-9.69	3.072	Q1_closed_10_E1_2_13_0001
-2903.93	2202.93	-9.114	8.26	Q1_closed_10_E1_2_13_0002
-2916.59	48.026	-17.644	4.465	Q1_closed_10_E1_3_13_0001
-2920.67	293.114	-12.125	5.341	Q1_closed_10_E1_3_13_0002
-2882.43	1458.51	-7.303	6.17	Q1_closed_10_E1_4_13_0001
-2917.67	617.379	-6.494	7.378	Q1_closed_10_E1_4_13_0002
-2920.43	1096.36	-8.998	8.251	Q1_closed_10_E1_5_13_0001
-2887.72	270.676	-19.939	3.82	Q1_closed_10_E1_5_13_0002
-2869.34	1088.52	-7.33	7.206	Q1_closed_10_E1_6_13_0001
-2884.02	583.691	-5.843	6.385	Q1_closed_10_E1_6_13_0002
-2884.5	258.137	-11.749	3.283	Q1_closed_10_E1_7_13_0001
-2848.99	283.266	-4.051	4.29	Q1_closed_10_E1_7_13_0002
-2913.59	1395.2	-10.922	6.749	Q1_closed_10_E1_8_13_0001
-2913.87	1229.35	-6.764	7.276	Q1_closed_10_E1_8_13_0002
-2881.23	608.833	-8.765	4.808	Q1_closed_10_E1_9_13_0001
-2878.05	283.1	-11.162	3.264	Q1_closed_10_E1_9_13_0002
-2769.98	874.922	-8.937	4.77	Q1_closed_11_E1_10_13_0001
-2901.56	242.957	-12.825	4.009	Q1_closed_11_E1_10_13_0002
-2903.76	483.03	-9.555	3.942	Q1_closed_11_E1_1_13_0001
-2886.59	1175.73	-6.137	6.519	Q1_closed_11_E1_1_13_0002
-2929.42	152.668	-10.898	4.907	Q1_closed_11_E1_2_13_0001
-2910.76	358.174	-11.148	4.483	Q1_closed_11_E1_2_13_0002
-2876.77	592.466	-13.727	5.762	Q1_closed_11_E1_3_13_0001
-2918.03	1928.41	-14.224	8.751	Q1_closed_11_E1_3_13_0002
-2930.92	108.08	-21.296	5.286	Q1_closed_11_E1_4_13_0001
-2877.77	525.545	-10.698	5.108	Q1_closed_11_E1_4_13_0002
-2883.47	201.887	-4.683	4.367	Q1_closed_11_E1_5_13_0001
-2909.39	1317.9	-14.005	6.471	Q1_closed_11_E1_5_13_0002
-2905.46	92.705	-9.4	3.287	Q1_closed_11_E1_6_13_0001
-2938.1	62.867	-24.71	5.518	Q1_closed_11_E1_6_13_0002
-2867.62	5686.11	-0.716	12.258	Q1_closed_11_E1_7_13_0001
-2908.09	320.287	-13.903	3.833	Q1_closed_11_E1_7_13_0002
-2900.63	186.052	-12.928	2.773	Q1_closed_11_E1_8_13_0001
-2899	1289.19	-5.354	5.682	Q1_closed_11_E1_8_13_0002
-2901.64	220.525	-6.545	3.324	Q1_closed_11_E1_9_13_0001
-2916.69	1598.66	-5.576	7.17	Q1_closed_11_E1_9_13_0002
-2930.7	322.107	-13.234	4.226	Q1_closed_12_E1_10_13_0001
-2914.75	263.126	-13.03	3.074	Q1_closed_12_E1_10_13_0002
-2938.94	233.617	-7.143	6.237	Q1_closed_12_E1_1_13_0001
-2941.62	504.618	-8.841	6.586	Q1_closed_12_E1_1_13_0002
-2960.07	325.448	-11.583	4.292	Q1_closed_12_E1_2_13_0001
-2946.41	620.932	-13.755	5.326	Q1_closed_12_E1_2_13_0002
-2879.42	293.839	-11.581	3.827	Q1_closed_12_E1_3_13_0001
-2928.71	1653.2	-8.638	6.356	Q1_closed_12_E1_3_13_0002
-2909.82	1858.68	-6.161	7.456	Q1_closed_12_E1_4_13_0001
-2942.77	296.27	-12.481	5.139	Q1_closed_12_E1_4_13_0002
-2939.89	120.105	-12.858	5.247	Q1_closed_12_E1_5_13_0001
-2921.65	205.524	-9.217	6.243	Q1_closed_12_E1_5_13_0002
-2928.73	173.083	-8.71	3.433	Q1_closed_12_E1_6_13_0001
-2917.55	704.252	-10.752	2.998	Q1_closed_12_E1_6_13_0002
-2726.04	6251.86	-9.501	15.496	Q1_closed_12_E1_7_13_0001
-2921.15	536.467	-4.775	9.838	Q1_closed_12_E1_7_13_0002
-2943.59	75.378	-15.199	4.706	Q1_closed_12_E1_8_13_0001
-2922.94	657.881	-4.621	6.289	Q1_closed_12_E1_8_13_0002
-2904.69	243.899	-8.725	3.361	Q1_closed_12_E1_9_13_0001
-2922.1	717.129	-3.55	6.303	Q1_closed_12_E1_9_13_0002
-2938.91	51.314	-24.756	3.136	Q1_closed_13_E1_10_13_0001
-2940.4	144.675	-15.017	4.491	Q1_closed_13_E1_10_13_0002
-2960.82	1187.36	-15.061	6.524	Q1_closed_13_E1_1_13_0001
-2929.08	851.096	-10.697	5.808	Q1_closed_13_E1_1_13_0002
-2948.47	287.841	-18.729	2.542	Q1_closed_13_E1_2_13_0001
-2959.75	1532.57	-6.535	6.06	Q1_closed_13_E1_2_13_0002
-2937.49	201.539	-13.841	2.035	Q1_closed_13_E1_3_13_0001
-2945.24	358.894	-14.185	4.281	Q1_closed_13_E1_3_13_0002
-2916.47	197.54	-11.217	3.513	Q1_closed_13_E1_4_13_0001
-2941.79	383.162	-11.662	4.408	Q1_closed_13_E1_4_13_0002
-2920.08	1164.93	-4.136	7.361	Q1_closed_13_E1_5_13_0001
-2949.06	2269.73	-8.935	7.781	Q1_closed_13_E1_5_13_0002
-2369.69	1422.09	-4.266	9.335	Q1_closed_13_E1_6_13_0001
-2960.17	907.3	-8.13	5.405	Q1_closed_13_E1_6_13_0002
-2957.66	309.054	-8.469	6.374	Q1_closed_13_E1_7_13_0001
-2958.05	328.385	-8.768	6.11	Q1_closed_13_E1_7_13_0002
-2962.37	200.566	-16.211	3.836	Q1_closed_13_E1_8_13_0001
-2951.69	1659.68	-6.711	8.794	Q1_closed_13_E1_8_13_0002
-2970.89	1649.14	0.202	9.714	Q1_closed_13_E1_9_13_0001
-2931.14	1821.09	-4.408	6.435	Q1_closed_13_E1_9_13_0002
-2918.34	402.887	-12.813	6.003	Q1_closed_14_E1_10_13_0001
-2917.81	168.788	-8.217	5.301	Q1_closed_14_E1_10_13_0002
-2912.21	450.018	-6.488	5.308	Q1_closed_14_E1_1_13_0001
-2924.64	871.521	-10.057	6.085	Q1_closed_14_E1_1_13_0002
-2921.06	1620.83	-10.374	7.707	Q1_closed_14_E1_2_13_0001
-2894.3	258.293	-7.705	3.837	Q1_closed_14_E1_2_13_0002
-2923.86	969.462	-10.308	7.358	Q1_closed_14_E1_3_13_0001
-2661.39	2483.79	-2.287	10.573	Q1_closed_14_E1_3_13_0002
-2913.78	291.73	-5.696	5.045	Q1_closed_14_E1_4_13_0001
-2888.48	346.378	-8.788	6.203	Q1_closed_14_E1_4_13_0002
-2943.21	150.839	-12.859	2.169	Q1_closed_14_E1_5_13_0001
-2917.33	144.203	-12.476	4.675	Q1_closed_14_E1_5_13_0002
-2943.55	1046.65	-5.693	6.444	Q1_closed_14_E1_6_13_0001
-2924.31	69.806	-11.925	5.054	Q1_closed_14_E1_6_13_0002
-2896	374.226	-7.31	4.781	Q1_closed_14_E1_7_13_0001
-2926.24	250.434	-13.06	5.727	Q1_closed_14_E1_7_13_0002
-2900.82	1296.96	-9.978	5.747	Q1_closed_14_E1_8_13_0001
-2923.57	1150.57	-10.138	7.594	Q1_closed_14_E1_8_13_0002
-2917.79	133.639	-8.857	5.53	Q1_closed_14_E1_9_13_0001
-2938.61	297.174	-14.56	3.607	Q1_closed_14_E1_9_13_0002
-2922.16	303.814	-7.755	3.952	Q1_closed_15_E1_10_13_0001
-2956.57	1572.06	-2.174	6.218	Q1_closed_15_E1_10_13_0002
-2970.99	53.284	-21.121	5.349	Q1_closed_15_E1_1_13_0001
-2967.41	377.939	-15.985	6.586	Q1_closed_15_E1_1_13_0002
-2967.55	123.283	-13.734	4.677	Q1_closed_15_E1_2_13_0001
-2959.55	1613.96	-3.399	6.493	Q1_closed_15_E1_2_13_0002
-2960	416.345	-14.014	6.44	Q1_closed_15_E1_3_13_0001
-2963.75	735.789	-9.335	7.816	Q1_closed_15_E1_3_13_0002
-2972.74	46.514	-20.074	5.513	Q1_closed_15_E1_4_13_0001
-2958.11	1443.91	-10.565	8.919	Q1_closed_15_E1_4_13_0002
-2946.78	1527.53	-11.397	10.924	Q1_closed_15_E1_5_13_0001
-2858.17	164.378	-9.031	5.407	Q1_closed_15_E1_5_13_0002
-2931.86	162.091	-12.974	2.465	Q1_closed_15_E1_6_13_0001
-2968.89	135.935	-15.38	5.161	Q1_closed_15_E1_6_13_0002
-2953.01	151.028	-10.422	4.6	Q1_closed_15_E1_7_13_0001
-2933.61	268.408	-12.103	3.375	Q1_closed_15_E1_7_13_0002
-2964.2	170.507	-9.662	5.441	Q1_closed_15_E1_8_13_0001
-2928.97	454.973	-4.482	4.38	Q1_closed_15_E1_8_13_0002
-2923.63	1872.95	-10.687	6.408	Q1_closed_15_E1_9_13_0001
-2959.77	1604.82	-4.636	6.637	Q1_closed_15_E1_9_13_0002
-2996.95	287.695	-10.35	3.727	Q1_closed_16_E1_10_13_0001
-3010.52	1285.9	-11.913	6.921	Q1_closed_16_E1_10_13_0002
-2988.8	751.86	-5.818	5.821	Q1_closed_16_E1_1_13_0001
-2985.97	1973.91	0	8.718	Q1_closed_16_E1_1_13_0002
-2985.89	1129.81	-6.553	6.543	Q1_closed_16_E1_2_13_0001
-2998.32	141.246	-8.135	4.146	Q1_closed_16_E1_2_13_0002
-3022.61	1548.02	-12.624	6.183	Q1_closed_16_E1_3_13_0001
-2992.98	690.68	-6.106	4.626	Q1_closed_16_E1_3_13_0002
-2996.89	276.858	-11.892	3.744	Q1_closed_16_E1_4_13_0001
-2998.55	1893.4	-8.882	7.219	Q1_closed_16_E1_4_13_0002
-3022.9	1543.64	-8.89	6.058	Q1_closed_16_E1_5_13_0001
-3015.37	241.731	-10.147	5.585	Q1_closed_16_E1_5_13_0002
-2936.27	391.331	-4.281	6.967	Q1_closed_16_E1_6_13_0001
-3017.82	84.411	-16.022	5.383	Q1_closed_16_E1_6_13_0002
-2984.08	315.152	-13.6	3.392	Q1_closed_16_E1_7_13_0001
-3000.76	239.363	-14.664	3.104	Q1_closed_16_E1_7_13_0002
-2989.89	251.691	-7.454	3.734	Q1_closed_16_E1_8_13_0001
-3012.63	279.923	-6.976	5.939	Q1_closed_16_E1_8_13_0002
-2983.65	281.435	-11.036	3.587	Q1_closed_16_E1_9_13_0001
-2977.95	2783.37	-1.01	8.949	Q1_closed_16_E1_9_13_0002
-2956.21	507.384	-14.419	3.298	Q1_closed_17_E1_10_13_0001
-2954.23	936.538	-13.852	4.217	Q1_closed_17_E1_10_13_0002
-2999.29	708.042	-9.311	8.818	Q1_closed_17_E1_1_13_0001
-2951.63	284.905	-10.832	3.881	Q1_closed_17_E1_1_13_0002
-2950.69	247.45	-12.957	2.709	Q1_closed_17_E1_2_13_0001
-2960.46	169.997	-8.133	3.519	Q1_closed_17_E1_2_13_0002
-2978.26	1323.5	-3.889	7.484	Q1_closed_17_E1_3_13_0001
-2981.41	70.127	-12.589	3.592	Q1_closed_17_E1_3_13_0002
-2988.64	86.107	-17.715	5.017	Q1_closed_17_E1_4_13_0001
-2951.15	49.092	-13.832	2.898	Q1_closed_17_E1_4_13_0002
-2981.12	1148.17	-10.311	7.063	Q1_closed_17_E1_5_13_0001
-2947.75	104.47	-11.492	2.99	Q1_closed_17_E1_5_13_0002
-2978.61	933.714	-11.18	4.989	Q1_closed_17_E1_6_13_0001
-2979.12	348.617	-15.268	3.918	Q1_closed_17_E1_6_13_0002
-2978.1	2049.37	-6.38	9.375	Q1_closed_17_E1_7_13_0001
-2509.22	704.096	-8.877	4.87	Q1_closed_17_E1_7_13_0002
-2971.57	51.767	-13.024	3.588	Q1_closed_17_E1_8_13_0001
-2966.35	358.786	-10.792	7.326	Q1_closed_17_E1_8_13_0002
-2961.23	715.085	-16.929	3.793	Q1_closed_17_E1_9_13_0001
-2926.27	1189.23	-9.571	8.274	Q1_closed_17_E1_9_13_0002
-2919.18	1985.89	-12.98	8.244	Q1_closed_18_E1_10_13_0001
-2908.66	713.165	-10.395	5.585	Q1_closed_18_E1_10_13_0002
-2909.06	345.571	-12.313	4.221	Q1_closed_18_E1_1_13_0001
-2937.04	328.81	-6.2	4.172	Q1_closed_18_E1_1_13_0002
-2925.42	147.557	-14.522	4.644	Q1_closed_18_E1_2_13_0001
-2915.45	59.987	-12.603	4.788	Q1_closed_18_E1_2_13_0002
-2909.47	355.503	-14.265	4.86	Q1_closed_18_E1_3_13_0001
-2916.66	1375.36	-5.604	7.271	Q1_closed_18_E1_3_13_0002
-2929.79	418.001	-9.973	3.609	Q1_closed_18_E1_4_13_0001
-2907.47	266.628	-13.753	3.413	Q1_closed_18_E1_4_13_0002
-2898.72	900.774	-4.949	4.954	Q1_closed_18_E1_5_13_0001
-2915.67	118.234	-10.741	5.378	Q1_closed_18_E1_5_13_0002
-2892.42	397.565	-4.833	4.737	Q1_closed_18_E1_6_13_0001
-2902.64	194.14	-12.972	4.549	Q1_closed_18_E1_6_13_0002
-2892.56	226.47	-10.175	3.359	Q1_closed_18_E1_7_13_0001
-2902.56	600.284	-7.312	5.013	Q1_closed_18_E1_7_13_0002
-2932.63	107.902	-25.033	4.47	Q1_closed_18_E1_8_13_0001
-2920.07	470.784	-10.367	5.02	Q1_closed_18_E1_8_13_0002
-2936.99	77.053	-17.116	1.177	Q1_closed_18_E1_9_13_0001
-2898.59	660.479	-5.981	6.034	Q1_closed_18_E1_9_13_0002
-3035.93	320.36	-7.912	4.878	Q1_closed_19_E1_10_13_0001
-2955.38	12020.4	-2.313	20.983	Q1_closed_19_E1_10_13_0002
-2999.28	304.387	-11.094	4.765	Q1_closed_19_E1_1_13_0001
-3014.83	226.609	-12.292	5.14	Q1_closed_19_E1_1_13_0002
-3043.9	1400.04	-19.208	8.289	Q1_closed_19_E1_2_13_0001
-3039.02	203.073	-10.017	3.488	Q1_closed_19_E1_2_13_0002
-3012.93	69.657	-6.41	3.992	Q1_closed_19_E1_3_13_0001
-3034.98	543.89	-3.772	3.477	Q1_closed_19_E1_3_13_0002
-3029	46.41	-21.419	5.032	Q1_closed_19_E1_4_13_0001
-2987.78	705.928	-9.343	6.64	Q1_closed_19_E1_4_13_0002
-2978.68	1407.11	-3.753	6.878	Q1_closed_19_E1_5_13_0001
-2982.38	622.933	-16.091	6.155	Q1_closed_19_E1_5_13_0002
-2986.05	496.58	-2.654	4.747	Q1_closed_19_E1_6_13_0002
-2969.69	1818.71	-6.563	8.02	Q1_closed_19_E1_7_13_0001
-2979.61	315.375	-5.597	3.368	Q1_closed_19_E1_7_13_0002
-3009.49	827.209	-13.574	6.523	Q1_closed_19_E1_8_13_0001
-3013.78	868.883	-10.135	6.258	Q1_closed_19_E1_8_13_0002
-2705.73	4220.37	-6.056	11.958	Q1_closed_19_E1_9_13_0001
-3014.97	975.528	-10.077	6.14	Q1_closed_19_E1_9_13_0002
-2892.02	298.921	-9.445	2.719	Q1_closed_1_E1_10_13_0001
-2939.7	311.895	-11.568	4.348	Q1_closed_1_E1_10_13_0002
-2972.84	5140.38	-7.6	13.855	Q1_closed_1_E1_1_13_0001
-2951.84	624.294	-6.45	7.746	Q1_closed_1_E1_1_13_0002
-2968.64	115.998	-14.545	5.395	Q1_closed_1_E1_2_13_0001
-2963.67	170.785	-11.816	5.342	Q1_closed_1_E1_2_13_0002
-2932.75	210.779	-8.046	3.471	Q1_closed_1_E1_3_13_0001
-2965.32	57.334	-17.65	5.213	Q1_closed_1_E1_3_13_0002
-2942.84	536.108	-3.894	5.884	Q1_closed_1_E1_4_13_0001
-2962.56	650.392	-11.248	5.548	Q1_closed_1_E1_4_13_0002
-2843.02	1231.54	-6.152	6.204	Q1_closed_1_E1_5_13_0001
-2963.19	145.403	-8.802	4.69	Q1_closed_1_E1_5_13_0002
-2939.82	1024.82	-6.828	4.962	Q1_closed_1_E1_6_13_0001
-2969.15	3056.58	-9.2	11.74	Q1_closed_1_E1_6_13_0002
-2931.9	1819.16	-5.866	9.737	Q1_closed_1_E1_7_13_0001
-2962.39	683.956	-10.849	5.641	Q1_closed_1_E1_7_13_0002
-2958.42	1246.37	-9.579	7.707	Q1_closed_1_E1_8_13_0001
-2882.82	775.166	-6.656	6.13	Q1_closed_1_E1_8_13_0002
-2954.32	1411.67	-11.711	8.351	Q1_closed_1_E1_9_13_0001
-2935.83	1752.65	-3.076	8.514	Q1_closed_1_E1_9_13_0002
-2743.82	1772.43	-5.375	16.684	Q1_closed_20_E1_10_13_0001
-2993.19	1232.79	-2.11	5.427	Q1_closed_20_E1_10_13_0002
-3008.92	925.076	-14.699	6.947	Q1_closed_20_E1_1_13_0001
-3005.15	873.275	-8.494	5.12	Q1_closed_20_E1_1_13_0002
-2976.88	393.721	-10.66	4.386	Q1_closed_20_E1_2_13_0001
-2986.65	337.244	-14.375	5.018	Q1_closed_20_E1_2_13_0002
-2986	360.125	-13.606	4.925	Q1_closed_20_E1_3_13_0001
-2992.17	595.804	-7.017	7.31	Q1_closed_20_E1_3_13_0002
-2978.84	1421.14	-10.244	6.47	Q1_closed_20_E1_4_13_0001
-3006.01	1281.68	-3.022	6.113	Q1_closed_20_E1_4_13_0002
-2994.11	113.567	-10.049	3.181	Q1_closed_20_E1_5_13_0001
-2983.48	240.599	-10.275	3.499	Q1_closed_20_E1_5_13_0002
-2996.88	419.015	-8.259	7.123	Q1_closed_20_E1_6_13_0001
-2982.95	508.33	-13.739	5.151	Q1_closed_20_E1_6_13_0002
-3001.07	1723.14	-7.166	8.548	Q1_closed_20_E1_7_13_0001
-3020.25	1075.28	-17.327	8.079	Q1_closed_20_E1_7_13_0002
-2968.46	719.745	-3.54	4.852	Q1_closed_20_E1_8_13_0001
-3005.62	235.317	-8.139	5.418	Q1_closed_20_E1_8_13_0002
-3004.28	120.088	-9.346	4.625	Q1_closed_20_E1_9_13_0001
-3007.27	112.477	-10.522	4.64	Q1_closed_20_E1_9_13_0002
-2943.81	321.537	-6.353	6.642	Q1_closed_2_E1_10_13_0001
-2976.9	110.972	-10.373	4.956	Q1_closed_2_E1_10_13_0002
-2971.41	958.565	-11.148	4.016	Q1_closed_2_E1_1_13_0001
-2789.98	615.892	-15.304	5.161	Q1_closed_2_E1_1_13_0002
-2965.76	425.088	-13.074	7.056	Q1_closed_2_E1_2_13_0001
-2955.76	250.892	-12.246	3.977	Q1_closed_2_E1_2_13_0002
-2974.15	690.875	-10.689	7.535	Q1_closed_2_E1_3_13_0001
-2969.58	318.125	-6.947	7.703	Q1_closed_2_E1_3_13_0002
-2968	193.618	-12.307	5.04	Q1_closed_2_E1_4_13_0001
-2973.37	231.358	-7.967	5.871	Q1_closed_2_E1_4_13_0002
-2968.18	234.493	-6.619	4.453	Q1_closed_2_E1_5_13_0001
-2970.24	1956.36	-10.896	7.233	Q1_closed_2_E1_5_13_0002
-2953.79	302.957	-13.872	3.4	Q1_closed_2_E1_6_13_0001
-2925.28	219.405	-8.02	4.319	Q1_closed_2_E1_6_13_0002
-2977.22	228.509	-11.489	5.373	Q1_closed_2_E1_7_13_0001
-2963.71	1422.23	-3.692	6.89	Q1_closed_2_E1_7_13_0002
-2962.28	86.548	-22.597	4.411	Q1_closed_2_E1_8_13_0001
-2950.11	711.082	-7.385	6.249	Q1_closed_2_E1_8_13_0002
-2928.17	386.22	-10.541	4.888	Q1_closed_2_E1_9_13_0001
-2975.61	308.797	-11.361	4.701	Q1_closed_2_E1_9_13_0002
-2951.48	306.805	-10.084	4.183	Q1_closed_3_E1_10_13_0001
-2958.33	310.445	-6.484	6.181	Q1_closed_3_E1_10_13_0002
-2956.32	1393.09	-6.378	5.997	Q1_closed_3_E1_1_13_0001
-2991.76	572.966	-4.11	6.944	Q1_closed_3_E1_1_13_0002
-2968.84	290.415	-10.791	3.327	Q1_closed_3_E1_2_13_0001
-2944.73	1085.56	-2.995	6.608	Q1_closed_3_E1_2_13_0002
-2993.88	507.374	-22.472	6.223	Q1_closed_3_E1_3_13_0001
-2980.8	1275.75	-10.067	9.234	Q1_closed_3_E1_3_13_0002
-2952.44	1426.33	-5.824	6.623	Q1_closed_3_E1_4_13_0001
-2975.82	798.428	-10.58	5.805	Q1_closed_3_E1_4_13_0002
-2997.03	91.869	-13.621	5.24	Q1_closed_3_E1_5_13_0001
-2957.7	4123.41	-9.661	12.615	Q1_closed_3_E1_5_13_0002
-3000.47	728.976	-13.652	6.086	Q1_closed_3_E1_6_13_0001
-2983.63	103.98	-12.483	5.457	Q1_closed_3_E1_6_13_0002
-2952.51	554.219	-13.205	4.452	Q1_closed_3_E1_7_13_0001
-2945.53	77.981	-9.061	2.521	Q1_closed_3_E1_7_13_0002
-2789.58	1226.21	-5.333	6.2	Q1_closed_3_E1_8_13_0001
-2975.51	1317.74	-5.798	4.741	Q1_closed_3_E1_8_13_0002
-2988.62	1896.13	-13.035	8.346	Q1_closed_3_E1_9_13_0001
-2951.12	308.318	-13.322	3.883	Q1_closed_3_E1_9_13_0002
-2921.35	863.448	-6.799	5.322	Q1_closed_4_E1_10_13_0001
-2930.24	307.154	-11.957	4.037	Q1_closed_4_E1_10_13_0002
-2964.34	1444.54	-6.206	5.587	Q1_closed_4_E1_1_13_0001
-2931.32	594.364	-12.416	4.736	Q1_closed_4_E1_1_13_0002
-2927.26	138.387	-9.717	4.92	Q1_closed_4_E1_2_13_0001
-2943.43	352.898	-13.556	5.279	Q1_closed_4_E1_2_13_0002
-2909.33	1497.26	-6.57	6.1	Q1_closed_4_E1_3_13_0001
-2958.63	1195.31	-12.518	8.566	Q1_closed_4_E1_3_13_0002
-2949.54	1204.16	-8.693	7.687	Q1_closed_4_E1_4_13_0001
-2924.46	221.807	-7.187	4.107	Q1_closed_4_E1_4_13_0002
-2924.01	184.263	-12.203	3.27	Q1_closed_4_E1_5_13_0001
-2920.16	1647.43	-5.605	5.913	Q1_closed_4_E1_5_13_0002
-2942.28	367.765	-5.757	5.911	Q1_closed_4_E1_6_13_0001
-2919.34	665.089	-7.378	4.602	Q1_closed_4_E1_6_13_0002
-2952.7	668.515	-6.321	7.28	Q1_closed_4_E1_7_13_0001
-2941.76	533.857	-8.712	7.093	Q1_closed_4_E1_7_13_0002
-2940.81	1665.64	-9.293	6.096	Q1_closed_4_E1_8_13_0001
-2944.65	1008.53	-8.667	5.909	Q1_closed_4_E1_8_13_0002
-2928.28	267.997	-8.96	4.725	Q1_closed_4_E1_9_13_0001
-2930.25	1151.2	-12.126	5.544	Q1_closed_4_E1_9_13_0002
-2960.85	2004.93	-3.033	9.321	Q1_closed_5_E1_10_13_0001
-2961.78	298.89	-7.724	4.149	Q1_closed_5_E1_10_13_0002
-2983.97	1896.33	-4.017	7.623	Q1_closed_5_E1_1_13_0001
-2975.2	1988.07	-11.385	7.175	Q1_closed_5_E1_1_13_0002
-2989.89	854.414	-15.244	5.687	Q1_closed_5_E1_2_13_0001
-2985.29	1676.55	-10.039	6.238	Q1_closed_5_E1_2_13_0002
-2985.8	241.98	-12.687	2.471	Q1_closed_5_E1_3_13_0001
-2963.55	90.146	-8.886	3.082	Q1_closed_5_E1_3_13_0002
-2959.44	526.851	-7.227	4.457	Q1_closed_5_E1_4_13_0001
-2989.73	46.07	-14.79	4.524	Q1_closed_5_E1_4_13_0002
-2967.57	253.4	-10.065	3.185	Q1_closed_5_E1_5_13_0001
-2968.28	1006.08	-8.452	4.228	Q1_closed_5_E1_5_13_0002
-2961.74	1218.19	-4.076	5.562	Q1_closed_5_E1_6_13_0001
-2982.28	738.894	-4.687	4.853	Q1_closed_5_E1_6_13_0002
-2976.53	1005.31	-4.96	6.613	Q1_closed_5_E1_7_13_0001
-2962.83	1189.9	-5.067	5.173	Q1_closed_5_E1_7_13_0002
-1274.52	1406.5	-3.574	6.146	Q1_closed_5_E1_8_13_0001
-2957.44	143.377	-6.141	4.346	Q1_closed_5_E1_8_13_0002
-2972.51	97.016	-6.968	3.922	Q1_closed_5_E1_9_13_0001
-2986.89	273.389	-11.488	5.496	Q1_closed_5_E1_9_13_0002
-2927.7	1440.83	-4.916	7.58	Q1_closed_6_E1_10_13_0001
-2919.71	405.773	-15.665	5.435	Q1_closed_6_E1_10_13_0002
-2932.8	153.68	-9.909	5.35	Q1_closed_6_E1_1_13_0001
-2902.22	232.596	-10.006	4.22	Q1_closed_6_E1_1_13_0002
-2904.48	250.542	-7.174	3.842	Q1_closed_6_E1_2_13_0001
-2941.82	806.227	-17.991	6.782	Q1_closed_6_E1_2_13_0002
-2932.97	299.272	-11.897	7.201	Q1_closed_6_E1_3_13_0001
-2899.32	1974.15	-5.075	6.625	Q1_closed_6_E1_3_13_0002
-2924.29	994.277	-5.62	7.317	Q1_closed_6_E1_4_13_0001
-2906	244.986	-10.519	3.318	Q1_closed_6_E1_4_13_0002
-2924.39	129.143	-11.17	5.353	Q1_closed_6_E1_5_13_0001
-2902.8	290.022	-9.564	4.112	Q1_closed_6_E1_5_13_0002
-2905.34	356.453	-12.07	4.55	Q1_closed_6_E1_6_13_0001
-2925.29	708.972	-10.03	7.039	Q1_closed_6_E1_6_13_0002
-2924.59	517.867	-4.078	5.591	Q1_closed_6_E1_7_13_0001
-2883.66	4434.84	-5.292	11.37	Q1_closed_6_E1_7_13_0002
-2910.36	761.204	-14.142	5.383	Q1_closed_6_E1_8_13_0001
-2885.79	383.21	-6.634	4.671	Q1_closed_6_E1_8_13_0002
-2916.57	419.72	-4.006	5.509	Q1_closed_6_E1_9_13_0001
-2916.61	262.791	-7.737	4.055	Q1_closed_6_E1_9_13_0002
-2936.99	956.442	-3.089	6.975	Q1_closed_7_E1_10_13_0001
-2921.54	1060.72	-10.605	5.547	Q1_closed_7_E1_10_13_0002
-2637.65	385.004	-9.237	3.489	Q1_closed_7_E1_1_13_0001
-2924.14	1260.22	-4.986	5.619	Q1_closed_7_E1_1_13_0002
-2920.04	270.153	-9.252	4.148	Q1_closed_7_E1_2_13_0001
-2936.99	333.021	-6.237	6.632	Q1_closed_7_E1_2_13_0002
-2952.2	334.844	-11.741	7.469	Q1_closed_7_E1_3_13_0001
-2931.81	812.417	-8.138	7.045	Q1_closed_7_E1_3_13_0002
-2933.87	701.296	-15.931	9.436	Q1_closed_7_E1_4_13_0001
-2947.16	233.294	-8.119	5.247	Q1_closed_7_E1_4_13_0002
-2903.29	2094.84	-2.736	7.767	Q1_closed_7_E1_5_13_0001
-2920.86	172.727	-12.129	3.19	Q1_closed_7_E1_5_13_0002
-2907.79	1161.38	-5.713	11.469	Q1_closed_7_E1_6_13_0001
-2953.88	56.221	-21.287	5.232	Q1_closed_7_E1_6_13_0002
-2919.76	276.366	-9.205	3.526	Q1_closed_7_E1_7_13_0001
-2922.71	245.281	-11.242	3.28	Q1_closed_7_E1_7_13_0002
-2917.44	317.074	-11.347	3.514	Q1_closed_7_E1_8_13_0001
-2912.52	1018.57	-7.32	10.932	Q1_closed_7_E1_8_13_0002
-2938.26	204.936	-10.557	5.185	Q1_closed_7_E1_9_13_0001
-2949.58	1107.08	-10.464	6.238	Q1_closed_7_E1_9_13_0002
-2937.95	230.113	-11.194	3.31	Q1_closed_8_E1_10_13_0001
-2934.04	545.464	-4.102	4.833	Q1_closed_8_E1_10_13_0002
-2958.18	1421.58	-8.856	6.81	Q1_closed_8_E1_1_13_0001
-2964.68	87.456	-13.927	3.848	Q1_closed_8_E1_1_13_0002
-2944.97	515.248	-14.231	6.301	Q1_closed_8_E1_2_13_0001
-2911.78	318.934	-3.952	3.89	Q1_closed_8_E1_2_13_0002
-2354.67	2346.24	-7.705	10.706	Q1_closed_8_E1_3_13_0001
-2938.29	1051.7	-5.146	5.476	Q1_closed_8_E1_3_13_0002
-2953.13	1135.9	-9.731	6.289	Q1_closed_8_E1_4_13_0001
-2935.91	1309.18	-5.291	5.884	Q1_closed_8_E1_4_13_0002
-2928.37	342.419	-7.906	4.091	Q1_closed_8_E1_5_13_0001
-2958.88	108.783	-12.204	4.766	Q1_closed_8_E1_5_13_0002
-2961.37	136.369	-8.869	5.484	Q1_closed_8_E1_6_13_0001
-2942.25	375.122	-4.819	5.278	Q1_closed_8_E1_6_13_0002
-2948.32	304.419	-4.137	4.463	Q1_closed_8_E1_7_13_0001
-2940.34	2582.93	-5.715	11.484	Q1_closed_8_E1_7_13_0002
-2960.04	1302.42	-14.026	6.755	Q1_closed_8_E1_8_13_0001
-2930.37	430.25	-5.351	4.489	Q1_closed_8_E1_8_13_0002
-2944.48	2975.71	-8.948	9.011	Q1_closed_8_E1_9_13_0001
-2957.17	365.467	-12.36	3.419	Q1_closed_8_E1_9_13_0002
-2917.97	1426.03	-6.498	9.63	Q1_closed_9_E1_10_13_0001
-2938.69	1719.92	-3.281	6.631	Q1_closed_9_E1_10_13_0002
-2918.55	507.128	-5.667	5.322	Q1_closed_9_E1_1_13_0001
-2919.53	272.486	-11.839	7.267	Q1_closed_9_E1_1_13_0002
-2725.98	912.756	-8.304	5.36	Q1_closed_9_E1_2_13_0001
-2936.69	1317.53	-8.482	7.023	Q1_closed_9_E1_2_13_0002
-2949.75	177.597	-13.238	5.221	Q1_closed_9_E1_3_13_0001
-2917.23	1276.22	-4.365	5.561	Q1_closed_9_E1_3_13_0002
-2921.7	272.307	-11.456	4.752	Q1_closed_9_E1_4_13_0001
-2952.21	205.969	-14.852	5.372	Q1_closed_9_E1_4_13_0002
-2943.98	120.729	-15.603	5.329	Q1_closed_9_E1_5_13_0001
-2926.29	191.901	-7.556	5.532	Q1_closed_9_E1_5_13_0002
-2940.95	429.958	-14.082	6.035	Q1_closed_9_E1_6_13_0001
-2942.17	219.783	-11.128	5.207	Q1_closed_9_E1_6_13_0002
-2950.36	85.881	-17.257	4.844	Q1_closed_9_E1_7_13_0001
-2945.35	352.859	-6.987	6.079	Q1_closed_9_E1_7_13_0002
-2915.57	1751.57	-4.356	6.263	Q1_closed_9_E1_8_13_0001
-2922.17	893.232	-13.708	5.158	Q1_closed_9_E1_8_13_0002
-2907.82	205.76	-9.501	5.149	Q1_closed_9_E1_9_13_0001
-2940.74	127.858	-8.632	4.372	Q1_closed_9_E1_9_13_0002
-2910.88	304.045	-10.055	5.646	Q1_closed_10_E1_10_14_0001
-2895.79	130.408	-14.766	5.381	Q1_closed_10_E1_10_14_0002
[truncated: 276,677+ more rows]
