# Supplementary material for: Allosteric mechanism for KCNE1 modulation of KCNQ1 potassium channel activation
Source: eLife. 2020 Oct 23;9:e57680. doi: 10.7554/eLife.57680 (PMC7584456; doi:10.7554/eLife.57680)
Supplement: Figure 3—figure supplement 3—source data 2. [file elife-57680-fig3-figsupp3-data2.xlsx]

## Sheet: Sheet1
Rosetta fullatom score	Atom pair restraint score	Rosetta ddg binding score	Interface RMSD vs best scoring	Model description
-2408.45	476.799	-8.39	11.207	Q1_open_11_E1_44_71_10_100_0001_0001
-2412.95	87.829	-17.182	3.635	Q1_open_11_E1_44_71_10_100_0002_0001
-2384.94	100.536	-8.671	3.495	Q1_open_11_E1_44_71_11_100_0001_0001
-2394.45	409.648	-1.384	7.428	Q1_open_11_E1_44_71_11_100_0002_0001
-2410.29	128.217	-9.198	4.233	Q1_open_11_E1_44_71_12_100_0001_0001
-2370.66	176.372	-10.596	6.108	Q1_open_11_E1_44_71_12_100_0002_0001
-1536.01	403.448	-6.109	16.953	Q1_open_11_E1_44_71_13_100_0001_0001
-2387.51	99.941	-10.017	4.175	Q1_open_11_E1_44_71_13_100_0002_0001
-2384.09	292.21	-15.128	6.859	Q1_open_11_E1_44_71_14_100_0001_0001
-2404.92	127.52	-11.429	4.759	Q1_open_11_E1_44_71_14_100_0002_0001
-2027.59	202.618	-2.393	6.22	Q1_open_11_E1_44_71_15_100_0001_0001
-2352.48	249.123	-8.003	6.551	Q1_open_11_E1_44_71_15_100_0002_0001
-2398.21	147.882	-11.767	5.061	Q1_open_11_E1_44_71_16_100_0001_0001
-2394	266.667	-5.366	6.818	Q1_open_11_E1_44_71_16_100_0002_0001
-2392.37	332.291	-10.876	11.909	Q1_open_11_E1_44_71_17_100_0001_0001
-2401.85	279.525	-17.245	7.699	Q1_open_11_E1_44_71_17_100_0002_0001
-2373.19	153.721	-7.04	5.009	Q1_open_11_E1_44_71_18_100_0001_0001
-2403.89	73.913	-10.87	5.7	Q1_open_11_E1_44_71_18_100_0002_0001
-2291.32	734.194	-9.71	7.802	Q1_open_11_E1_44_71_19_100_0001_0001
-2398.85	120.147	-8.568	5.442	Q1_open_11_E1_44_71_19_100_0002_0001
-2405.47	293.759	-18.416	8.376	Q1_open_11_E1_44_71_1_100_0001_0001
-2392.61	118.284	-8.976	4.432	Q1_open_11_E1_44_71_1_100_0002_0001
-2392.74	285.648	-5.776	5.667	Q1_open_11_E1_44_71_20_100_0001_0001
-2400.14	89.964	-11.686	4.98	Q1_open_11_E1_44_71_20_100_0002_0001
-2470.78	385.457	-11.096	6.415	Q1_open_11_E1_44_71_2_100_0001_0001
-2390.99	102.849	-19.243	6.767	Q1_open_11_E1_44_71_2_100_0002_0001
-2435.74	364.483	-7.958	5.692	Q1_open_11_E1_44_71_3_100_0001_0001
-2251.88	591.754	-12.55	17.51	Q1_open_11_E1_44_71_3_100_0002_0001
-2391.32	81.828	-16.628	4.492	Q1_open_11_E1_44_71_4_100_0001_0001
-2404.1	80.698	-6.984	4.792	Q1_open_11_E1_44_71_4_100_0002_0001
-1952.6	399.752	-11.674	6.72	Q1_open_11_E1_44_71_5_100_0001_0001
-2397.29	138.916	-4.72	4.112	Q1_open_11_E1_44_71_5_100_0002_0001
-2460.53	345.69	-6.723	6.056	Q1_open_11_E1_44_71_6_100_0001_0001
-2398.46	101.108	-7.491	3.092	Q1_open_11_E1_44_71_6_100_0002_0001
-2401.36	247.032	-12.704	6.943	Q1_open_11_E1_44_71_7_100_0001_0001
-2427.08	68.919	-9.27	2.912	Q1_open_11_E1_44_71_7_100_0002_0001
-2373.38	135.356	-3.63	4.121	Q1_open_11_E1_44_71_8_100_0001_0001
-2393.61	127.559	-9.253	5.905	Q1_open_11_E1_44_71_8_100_0002_0001
-2407.24	76.136	-15.257	4.119	Q1_open_11_E1_44_71_9_100_0001_0001
-2380.43	64.978	-10.561	2.98	Q1_open_11_E1_44_71_9_100_0002_0001
-2454.39	120.712	-8.216	4.295	Q1_open_17_E1_44_71_10_100_0001_0001
-2454.26	104.285	-8.994	3.117	Q1_open_17_E1_44_71_10_100_0002_0001
-2430.04	184.738	-7.423	6.121	Q1_open_17_E1_44_71_11_100_0001_0001
-2460.42	192.219	-7.638	5.285	Q1_open_17_E1_44_71_11_100_0002_0001
-2463.3	727.531	-5.766	11.994	Q1_open_17_E1_44_71_12_100_0001_0001
-2453.92	73.105	-21.251	2.884	Q1_open_17_E1_44_71_12_100_0002_0001
-2476.55	96.87	-17.077	6.647	Q1_open_17_E1_44_71_13_100_0001_0001
-2457.82	170.022	-12.254	4.752	Q1_open_17_E1_44_71_13_100_0002_0001
-2458.93	177.865	-17.379	5.247	Q1_open_17_E1_44_71_14_100_0001_0001
-2460.87	654.16	-3.304	10.815	Q1_open_17_E1_44_71_14_100_0002_0001
-1884.05	348.635	-4.278	10.986	Q1_open_17_E1_44_71_15_100_0001_0001
-2442.2	123.018	-11.369	3.222	Q1_open_17_E1_44_71_15_100_0002_0001
-2203.28	157.546	-3.201	4.296	Q1_open_17_E1_44_71_16_100_0001_0001
-2350.18	177.686	-7.496	7.529	Q1_open_17_E1_44_71_16_100_0002_0001
-2458.4	76.616	-16.835	3.516	Q1_open_17_E1_44_71_17_100_0001_0001
-2455.86	108.331	-13.149	4.465	Q1_open_17_E1_44_71_17_100_0002_0001
-2399.24	1542.65	-2.663	11.928	Q1_open_17_E1_44_71_18_100_0001_0001
-2466.14	103.543	-15.873	4.132	Q1_open_17_E1_44_71_18_100_0002_0001
-2432.35	351.848	-3.153	6.675	Q1_open_17_E1_44_71_19_100_0001_0001
-2424.46	44.389	-7.4	6.255	Q1_open_17_E1_44_71_19_100_0002_0001
-2458.78	167.266	-12.81	6.12	Q1_open_17_E1_44_71_1_100_0001_0001
-2449.37	242.077	-4.712	6.067	Q1_open_17_E1_44_71_1_100_0002_0001
-2532.66	277.672	-6.268	6.386	Q1_open_17_E1_44_71_20_100_0001_0001
-2460.63	136.009	-17.891	4.218	Q1_open_17_E1_44_71_20_100_0002_0001
-2445.14	76.708	-8.123	2.719	Q1_open_17_E1_44_71_2_100_0001_0001
-2513.58	278.236	-14.157	6.405	Q1_open_17_E1_44_71_2_100_0002_0001
-2457.2	431.385	-6.085	6.384	Q1_open_17_E1_44_71_3_100_0001_0001
-2450.72	81.693	-4.131	3.197	Q1_open_17_E1_44_71_3_100_0002_0001
-2137.28	163.505	-9.721	6.536	Q1_open_17_E1_44_71_4_100_0001_0001
-2479.11	72.987	-21.224	5.294	Q1_open_17_E1_44_71_4_100_0002_0001
-2470.99	83.317	-10.253	4.103	Q1_open_17_E1_44_71_5_100_0001_0001
-2422.16	104.475	-13.827	4.247	Q1_open_17_E1_44_71_5_100_0002_0001
-2466.91	718.48	-7.019	9.788	Q1_open_17_E1_44_71_6_100_0001_0001
-2459.71	137.139	-11.171	4.297	Q1_open_17_E1_44_71_6_100_0002_0001
-2412.89	100.355	-1.534	4.48	Q1_open_17_E1_44_71_7_100_0001_0001
-2462.77	99.695	-11.81	2.163	Q1_open_17_E1_44_71_7_100_0002_0001
-2500.62	44.86	-15.829	3.039	Q1_open_17_E1_44_71_8_100_0001_0001
-2462.06	251.916	-6.48	8.379	Q1_open_17_E1_44_71_8_100_0002_0001
-2552.33	123.178	-14.773	2.754	Q1_open_17_E1_44_71_9_100_0001_0001
-2567.19	119.879	-14.222	2.692	Q1_open_17_E1_44_71_9_100_0002_0001
-2422	104.561	-16.371	3.791	Q1_open_18_E1_44_71_10_100_0001_0001
-2398.7	510.58	-12.501	8.494	Q1_open_18_E1_44_71_10_100_0002_0001
-2372.92	235.452	-4.708	8.549	Q1_open_18_E1_44_71_11_100_0001_0001
-2387.57	115.461	-16.057	2.192	Q1_open_18_E1_44_71_11_100_0002_0001
-2121.33	1741.34	-4.929	17.027	Q1_open_18_E1_44_71_12_100_0001_0001
-2456.98	272.937	-10.862	6.1	Q1_open_18_E1_44_71_12_100_0002_0001
-2386.64	645.158	-1.077	7.601	Q1_open_18_E1_44_71_13_100_0001_0001
-2448.24	293.977	-8.986	4.995	Q1_open_18_E1_44_71_13_100_0002_0001
-2320.03	5954.69	0	26.329	Q1_open_18_E1_44_71_14_100_0001_0001
-2432.34	238.844	-8.288	4.412	Q1_open_18_E1_44_71_14_100_0002_0001
-2346.53	1296.64	-5.254	9.242	Q1_open_18_E1_44_71_15_100_0001_0001
-2407.68	114.862	-12.762	3.907	Q1_open_18_E1_44_71_15_100_0002_0001
-2418.42	162.311	-12.214	5.993	Q1_open_18_E1_44_71_16_100_0001_0001
-2391.37	391.001	-6.324	9.846	Q1_open_18_E1_44_71_16_100_0002_0001
-2415.6	263.904	-7.952	7.65	Q1_open_18_E1_44_71_17_100_0001_0001
-2370.7	299.851	-8.585	4.849	Q1_open_18_E1_44_71_17_100_0002_0001
-2420.95	132.867	-15.925	7.452	Q1_open_18_E1_44_71_18_100_0001_0001
-2245.33	224.384	-1.835	5.334	Q1_open_18_E1_44_71_18_100_0002_0001
-2257.49	91.49	-14.738	1.781	Q1_open_18_E1_44_71_19_100_0001_0001
-2392.25	158.659	-11.894	4.126	Q1_open_18_E1_44_71_19_100_0002_0001
-2466.58	221.149	-8.151	3.208	Q1_open_18_E1_44_71_1_100_0001_0001
-2372.46	305.534	-7.137	6.58	Q1_open_18_E1_44_71_1_100_0002_0001
-2283.19	593.085	-4.779	7.695	Q1_open_18_E1_44_71_20_100_0001_0001
-2413.45	235.06	-13.405	5.474	Q1_open_18_E1_44_71_20_100_0002_0001
-2457.17	170.014	-13.088	3.004	Q1_open_18_E1_44_71_2_100_0001_0001
-2371.65	192.179	-7.033	8.213	Q1_open_18_E1_44_71_2_100_0002_0001
-2413.79	283.362	-9.25	7.658	Q1_open_18_E1_44_71_3_100_0001_0001
-2420.24	133.334	-8.165	5.285	Q1_open_18_E1_44_71_3_100_0002_0001
-2413.27	92.932	-15.688	6.776	Q1_open_18_E1_44_71_4_100_0001_0001
-2414.78	110.706	-8.64	3.986	Q1_open_18_E1_44_71_4_100_0002_0001
-2416.04	80.1	-14.921	2.542	Q1_open_18_E1_44_71_5_100_0001_0001
-2417	89.054	-6.804	3.96	Q1_open_18_E1_44_71_5_100_0002_0001
-2393.86	275.057	-7.97	6.449	Q1_open_18_E1_44_71_6_100_0001_0001
-2388.19	261.675	-4.905	6.023	Q1_open_18_E1_44_71_6_100_0002_0001
-2380.86	255.584	-9.923	5.968	Q1_open_18_E1_44_71_7_100_0001_0001
-2416.71	152.054	-10.93	4.058	Q1_open_18_E1_44_71_7_100_0002_0001
-2403.14	120.842	-9.851	7.652	Q1_open_18_E1_44_71_8_100_0001_0001
-2367.95	80.417	-20.321	5.799	Q1_open_18_E1_44_71_8_100_0002_0001
-2351.98	531.156	-3.404	7.251	Q1_open_18_E1_44_71_9_100_0001_0001
-2413.06	115.53	-5.902	5.968	Q1_open_18_E1_44_71_9_100_0002_0001
-2257.97	252.599	-8.077	4.08	Q1_open_20_E1_44_71_10_100_0001_0001
-2236.41	322.129	-3.746	6.224	Q1_open_20_E1_44_71_10_100_0002_0001
-2257.3	131.361	-7.206	5.801	Q1_open_20_E1_44_71_11_100_0001_0001
-2216.88	179.798	-8.957	6.058	Q1_open_20_E1_44_71_11_100_0002_0001
-2249.29	69.799	-20.178	2.654	Q1_open_20_E1_44_71_12_100_0001_0001
-2240.38	117.313	-8.731	4.27	Q1_open_20_E1_44_71_12_100_0002_0001
-2269.49	410.496	-14.834	7.061	Q1_open_20_E1_44_71_13_100_0001_0001
-2214.93	188.589	-6.311	5.766	Q1_open_20_E1_44_71_13_100_0002_0001
-2235.42	290.31	-8.114	5.178	Q1_open_20_E1_44_71_14_100_0001_0001
-2011.07	640.284	-0.446	8.467	Q1_open_20_E1_44_71_14_100_0002_0001
-2224.77	417.339	-1.89	10.06	Q1_open_20_E1_44_71_15_100_0001_0001
-2251.04	118.469	-11.878	4.441	Q1_open_20_E1_44_71_15_100_0002_0001
-2213.47	202.866	-6.369	5.224	Q1_open_20_E1_44_71_16_100_0001_0001
-2248.1	175.445	-6.151	6.806	Q1_open_20_E1_44_71_16_100_0002_0001
-2250.77	877.358	-6.208	8.707	Q1_open_20_E1_44_71_17_100_0001_0001
-2262.15	128.856	-18.727	4.908	Q1_open_20_E1_44_71_17_100_0002_0001
-2253.68	362.513	-6.859	7.784	Q1_open_20_E1_44_71_18_100_0001_0001
-2251.36	298.011	-7.551	8.261	Q1_open_20_E1_44_71_18_100_0002_0001
-2255.13	116.92	-12.11	4.453	Q1_open_20_E1_44_71_19_100_0001_0001
-2253.51	108.77	-12.506	4.466	Q1_open_20_E1_44_71_19_100_0002_0001
-2262.68	145.464	-10.681	4.453	Q1_open_20_E1_44_71_1_100_0001_0001
-2245.75	222.148	-2.953	4.391	Q1_open_20_E1_44_71_1_100_0002_0001
-2274.84	169.757	-11.735	2.529	Q1_open_20_E1_44_71_20_100_0001_0001
-2052.99	206.508	-7.791	5.924	Q1_open_20_E1_44_71_20_100_0002_0001
-2250.2	222.366	-15.407	4.063	Q1_open_20_E1_44_71_2_100_0001_0001
-2235.09	164.25	-8.484	5.689	Q1_open_20_E1_44_71_2_100_0002_0001
-2320.69	418.55	-10.664	5.01	Q1_open_20_E1_44_71_3_100_0001_0001
-2173.11	288.341	-9.232	6.355	Q1_open_20_E1_44_71_3_100_0002_0001
-2205.06	1092.01	-4.407	9.334	Q1_open_20_E1_44_71_4_100_0001_0001
-2247.12	198.542	-5.132	4.039	Q1_open_20_E1_44_71_4_100_0002_0001
-2252.17	354.366	-10.843	10.013	Q1_open_20_E1_44_71_5_100_0001_0001
-2258.64	113.907	-15.941	5.828	Q1_open_20_E1_44_71_5_100_0002_0001
-2201.69	250.908	-5.879	7.082	Q1_open_20_E1_44_71_6_100_0001_0001
-2268.89	155.179	-12.835	5.571	Q1_open_20_E1_44_71_6_100_0002_0001
-2112.09	231.997	-9.481	5.682	Q1_open_20_E1_44_71_7_100_0001_0001
-2259.97	204.789	-14.018	4.213	Q1_open_20_E1_44_71_7_100_0002_0001
-2256.34	898.493	-0.319	10.19	Q1_open_20_E1_44_71_8_100_0001_0001
-2105.66	312.281	-6.262	6.239	Q1_open_20_E1_44_71_8_100_0002_0001
-2245.28	255.306	-5.077	5.476	Q1_open_20_E1_44_71_9_100_0001_0001
-2255.82	185.246	-11.421	5.14	Q1_open_20_E1_44_71_9_100_0002_0001
-2256.38	361.801	-4.946	5.766	Q1_open_22_E1_44_71_10_100_0001_0001
-2308.29	125.237	-9.031	4.889	Q1_open_22_E1_44_71_10_100_0002_0001
-2315.17	98.865	-20.673	5.864	Q1_open_22_E1_44_71_11_100_0001_0001
-2381.11	129.223	-6.932	3.892	Q1_open_22_E1_44_71_11_100_0002_0001
-2333.27	140.746	-23.335	5.585	Q1_open_22_E1_44_71_12_100_0001_0001
-2284.68	89.48	-5.516	4.086	Q1_open_22_E1_44_71_12_100_0002_0001
-2294.27	39.194	-8.129	3.844	Q1_open_22_E1_44_71_13_100_0001_0001
-2277.43	1390.48	-0.574	13.48	Q1_open_22_E1_44_71_13_100_0002_0001
-2336.19	172.282	-10.321	6.17	Q1_open_22_E1_44_71_14_100_0001_0001
-2366.84	41.756	-20.063	3.197	Q1_open_22_E1_44_71_14_100_0002_0001
-2307.1	230.003	-6.348	7.924	Q1_open_22_E1_44_71_15_100_0001_0001
-2287.55	78.215	-9.229	6.063	Q1_open_22_E1_44_71_15_100_0002_0001
-2271.05	56.152	-12.853	4.158	Q1_open_22_E1_44_71_16_100_0001_0001
-2294.35	144.495	-3.628	5.568	Q1_open_22_E1_44_71_16_100_0002_0001
-2352.04	232.335	-10.28	6.778	Q1_open_22_E1_44_71_17_100_0001_0001
-2306.05	242.787	-9.943	6.003	Q1_open_22_E1_44_71_17_100_0002_0001
-2393.45	111.572	-19.584	4.854	Q1_open_22_E1_44_71_18_100_0001_0001
-2319.81	106.419	-10.575	5.327	Q1_open_22_E1_44_71_18_100_0002_0001
-2324.05	78.754	-10.218	4.746	Q1_open_22_E1_44_71_19_100_0001_0001
-2289.97	137.058	-10.963	5.498	Q1_open_22_E1_44_71_19_100_0002_0001
-2309.69	100.434	-7.609	3.077	Q1_open_22_E1_44_71_1_100_0001_0001
-2379.84	235.982	-4.046	4.656	Q1_open_22_E1_44_71_1_100_0002_0001
-2333.34	70.136	-19.481	5.066	Q1_open_22_E1_44_71_20_100_0001_0001
-2326.12	69.996	-11.647	4.849	Q1_open_22_E1_44_71_20_100_0002_0001
-2355.78	123.85	-9.388	3.977	Q1_open_22_E1_44_71_2_100_0001_0001
-2284.93	98.23	-10.822	2.614	Q1_open_22_E1_44_71_2_100_0002_0001
-2270.9	190.526	-15.701	7.274	Q1_open_22_E1_44_71_3_100_0001_0001
-2313.01	117.11	-6.177	2.821	Q1_open_22_E1_44_71_3_100_0002_0001
-2323.77	84.921	-14.656	5.575	Q1_open_22_E1_44_71_4_100_0001_0001
-2093.56	263.742	-5.45	7.672	Q1_open_22_E1_44_71_4_100_0002_0001
-2296.88	111.553	-10.258	3.703	Q1_open_22_E1_44_71_5_100_0001_0001
-2313.42	218.339	-18.611	7.925	Q1_open_22_E1_44_71_5_100_0002_0001
-2310.89	388.866	-9.283	8.886	Q1_open_22_E1_44_71_6_100_0001_0001
-2063.38	387.383	-6.954	9.232	Q1_open_22_E1_44_71_6_100_0002_0001
-2319.47	473.376	-13.996	13.029	Q1_open_22_E1_44_71_7_100_0001_0001
-2323.01	155.325	-14.194	6.323	Q1_open_22_E1_44_71_7_100_0002_0001
-2295.26	425.587	-6.515	13.534	Q1_open_22_E1_44_71_8_100_0001_0001
-2316.37	660.045	-7.301	9.684	Q1_open_22_E1_44_71_8_100_0002_0001
-2321.51	86	-13.334	3.537	Q1_open_22_E1_44_71_9_100_0001_0001
-2308.69	89.379	-4.806	3.754	Q1_open_22_E1_44_71_9_100_0002_0001
-2726.01	122.966	-21.984	6.652	Q1_open_3_E1_44_71_10_100_0001_0001
-2717.65	114.158	-13.455	5.046	Q1_open_3_E1_44_71_10_100_0002_0001
-2701.51	144.559	-11.381	5.008	Q1_open_3_E1_44_71_11_100_0001_0001
-2714.61	118.768	-16.658	6.81	Q1_open_3_E1_44_71_11_100_0002_0001
-2722.69	125.939	-26.419	4.987	Q1_open_3_E1_44_71_12_100_0001_0001
-2694.85	1597.96	-2.252	13.121	Q1_open_3_E1_44_71_12_100_0002_0001
-2642.07	1151.89	-3.494	13.232	Q1_open_3_E1_44_71_13_100_0001_0001
-2708.68	240.044	-6.939	3.993	Q1_open_3_E1_44_71_13_100_0002_0001
-2730.91	98.539	-13.49	2.205	Q1_open_3_E1_44_71_14_100_0001_0001
-2700.18	101.123	-7.952	4.469	Q1_open_3_E1_44_71_14_100_0002_0001
-2704.03	131.174	-11.754	4.924	Q1_open_3_E1_44_71_15_100_0001_0001
-2643.64	1569.02	-3.451	12.097	Q1_open_3_E1_44_71_15_100_0002_0001
-2669.44	85.307	-5.027	5.001	Q1_open_3_E1_44_71_16_100_0001_0001
-2718.8	86.617	-9.724	4.198	Q1_open_3_E1_44_71_16_100_0002_0001
-2718.99	279.504	-7.292	6.298	Q1_open_3_E1_44_71_17_100_0001_0001
-2720.17	208.275	-9.88	5.933	Q1_open_3_E1_44_71_17_100_0002_0001
-2701.34	183.901	-12.871	3.003	Q1_open_3_E1_44_71_18_100_0001_0001
-2702.53	99.803	-18	2.635	Q1_open_3_E1_44_71_18_100_0002_0001
-2696.52	160.698	-11.907	6.044	Q1_open_3_E1_44_71_19_100_0001_0001
-2714.88	126.849	-16.156	5.095	Q1_open_3_E1_44_71_19_100_0002_0001
-2706.8	374.689	-6.627	9.633	Q1_open_3_E1_44_71_1_100_0001_0001
-2563.94	303.39	-6.194	8.035	Q1_open_3_E1_44_71_1_100_0002_0001
-2689.37	104.121	-12.173	6.323	Q1_open_3_E1_44_71_20_100_0001_0001
-2673.34	114.05	-4.149	7.611	Q1_open_3_E1_44_71_20_100_0002_0001
-2694.85	202.553	-5.733	5.562	Q1_open_3_E1_44_71_2_100_0001_0001
-2699.1	97.328	-8.88	4.707	Q1_open_3_E1_44_71_2_100_0002_0001
-2720.47	206.99	-8.328	5.539	Q1_open_3_E1_44_71_3_100_0001_0001
-2699.17	238.901	-7.081	6.097	Q1_open_3_E1_44_71_3_100_0002_0001
-2612.03	116.758	-9.568	8.019	Q1_open_3_E1_44_71_4_100_0001_0001
-2708.09	129.992	-12.127	8.155	Q1_open_3_E1_44_71_4_100_0002_0001
-2705.42	152.483	-9.349	6.886	Q1_open_3_E1_44_71_5_100_0001_0001
-2695.85	137.853	-9.81	3.932	Q1_open_3_E1_44_71_5_100_0002_0001
-2747.47	280.968	-8.839	4.831	Q1_open_3_E1_44_71_6_100_0001_0001
-2632.14	269.587	-7.574	6.811	Q1_open_3_E1_44_71_6_100_0002_0001
-2729.59	235.439	-10.546	5.885	Q1_open_3_E1_44_71_7_100_0001_0001
-2709.4	224.707	-9.162	4.672	Q1_open_3_E1_44_71_7_100_0002_0001
-2696.67	188.711	-6.384	4.838	Q1_open_3_E1_44_71_8_100_0001_0001
-2728.64	125.742	-11.332	5.278	Q1_open_3_E1_44_71_8_100_0002_0001
-2688.76	246.113	-7.622	5.477	Q1_open_3_E1_44_71_9_100_0001_0001
-2658.08	3350.02	-3.305	17.214	Q1_open_3_E1_44_71_9_100_0002_0001
-3279.64	134.295	-10.308	7.569	Q1_open_6_E1_44_71_10_100_0001_0001
-3287.94	565.395	-8.215	12.649	Q1_open_6_E1_44_71_10_100_0002_0001
-3258.86	241.76	-7.6	6.639	Q1_open_6_E1_44_71_11_100_0001_0001
-3328.72	212.48	-8.761	5.707	Q1_open_6_E1_44_71_11_100_0002_0001
-3318.62	482.39	-3.965	7.543	Q1_open_6_E1_44_71_12_100_0001_0001
-3285.17	103.36	-9.49	5.122	Q1_open_6_E1_44_71_12_100_0002_0001
-3301.83	327.375	-4.502	6.535	Q1_open_6_E1_44_71_13_100_0001_0001
-3293.62	114.33	-7.094	4.371	Q1_open_6_E1_44_71_13_100_0002_0001
-3316.83	143.167	-12.346	2.977	Q1_open_6_E1_44_71_14_100_0001_0001
-3254.03	143.144	-12.772	7.682	Q1_open_6_E1_44_71_14_100_0002_0001
-3322.63	861.816	-6.1	10.597	Q1_open_6_E1_44_71_15_100_0001_0001
-3290.28	109.459	-11.503	6.818	Q1_open_6_E1_44_71_15_100_0002_0001
-3288.61	243.11	-6.373	9.886	Q1_open_6_E1_44_71_16_100_0001_0001
-3326.57	102.452	-8.734	3.841	Q1_open_6_E1_44_71_16_100_0002_0001
-3329.64	315.056	-7.012	6.893	Q1_open_6_E1_44_71_17_100_0001_0001
-3285.51	104.524	-6.165	5.321	Q1_open_6_E1_44_71_17_100_0002_0001
-3335.08	362.431	-11.62	8.842	Q1_open_6_E1_44_71_18_100_0001_0001
-3290.52	77.85	-6.42	5.591	Q1_open_6_E1_44_71_18_100_0002_0001
-3298.61	330.088	-9.382	10.01	Q1_open_6_E1_44_71_19_100_0001_0001
-3300.88	116.649	-1.689	3.403	Q1_open_6_E1_44_71_19_100_0002_0001
-3285.89	202.53	-14.786	6.798	Q1_open_6_E1_44_71_1_100_0001_0001
-3297.87	225.042	-6.776	6.359	Q1_open_6_E1_44_71_1_100_0002_0001
-3297.44	167.437	-18.052	6.478	Q1_open_6_E1_44_71_20_100_0001_0001
-3284.66	166.619	1.408	5.698	Q1_open_6_E1_44_71_20_100_0002_0001
-3318.36	464.47	-11.119	7.967	Q1_open_6_E1_44_71_2_100_0001_0001
-3317.06	210.681	-9.1	5.6	Q1_open_6_E1_44_71_2_100_0002_0001
-3291.26	107.521	-8.753	5.821	Q1_open_6_E1_44_71_3_100_0001_0001
-3294.6	89.841	-8.86	5.33	Q1_open_6_E1_44_71_3_100_0002_0001
-3288.76	92.222	-10.843	5.641	Q1_open_6_E1_44_71_4_100_0001_0001
-3323.39	113.95	-8.331	3.761	Q1_open_6_E1_44_71_4_100_0002_0001
-3322.76	332.805	-9.38	5.133	Q1_open_6_E1_44_71_5_100_0001_0001
-3329.02	254.164	-8.943	6.438	Q1_open_6_E1_44_71_5_100_0002_0001
-3278.32	151.463	-16.955	6.392	Q1_open_6_E1_44_71_6_100_0001_0001
-3298.42	177.007	-12.115	6.094	Q1_open_6_E1_44_71_6_100_0002_0001
-2688.48	1533.52	0	21.329	Q1_open_6_E1_44_71_7_100_0001_0001
-3316.74	136.955	-2.026	4.8	Q1_open_6_E1_44_71_7_100_0002_0001
-3329.94	202.911	-7.928	6.798	Q1_open_6_E1_44_71_8_100_0001_0001
-3301.18	139.275	-15.357	4.014	Q1_open_6_E1_44_71_8_100_0002_0001
-2651.25	7921.47	-1.034	25.65	Q1_open_6_E1_44_71_9_100_0001_0001
-3292.16	175.178	-11.516	6.22	Q1_open_6_E1_44_71_9_100_0002_0001
-2397.2	413.587	-5.119	10.826	Q1_open_9_E1_44_71_10_100_0001_0001
-2410.48	109.343	-6.387	3.882	Q1_open_9_E1_44_71_10_100_0002_0001
-1579.47	234.095	-6.966	4.388	Q1_open_9_E1_44_71_11_100_0001_0001
-2401	696.548	-3.383	13.582	Q1_open_9_E1_44_71_11_100_0002_0001
-2402.18	405.902	-15.369	9.363	Q1_open_9_E1_44_71_12_100_0001_0001
-2334.9	966.315	-1.204	15.922	Q1_open_9_E1_44_71_12_100_0002_0001
-2426.59	108.138	-7.082	3.964	Q1_open_9_E1_44_71_13_100_0001_0001
-2405.59	78.794	-11.339	4.675	Q1_open_9_E1_44_71_13_100_0002_0001
-2476.3	106.907	-13.127	4.18	Q1_open_9_E1_44_71_14_100_0001_0001
-2456.94	56.399	-11.822	3.3	Q1_open_9_E1_44_71_14_100_0002_0001
-1773.52	363.076	-6.897	9.014	Q1_open_9_E1_44_71_15_100_0001_0001
-2379.15	167.826	-7.34	3.928	Q1_open_9_E1_44_71_15_100_0002_0001
-2489.9	125.472	-15.74	3.026	Q1_open_9_E1_44_71_16_100_0001_0001
-2430.07	154.875	-12.946	4.971	Q1_open_9_E1_44_71_16_100_0002_0001
-2376.24	167.619	-14.174	2.957	Q1_open_9_E1_44_71_17_100_0001_0001
-2416.65	90.966	-8.201	5.607	Q1_open_9_E1_44_71_17_100_0002_0001
-2413.47	512.612	-11.27	9.36	Q1_open_9_E1_44_71_18_100_0001_0001
-2397.74	111.579	-7.115	3.353	Q1_open_9_E1_44_71_18_100_0002_0001
-2282.26	514.363	-5.19	9.209	Q1_open_9_E1_44_71_19_100_0001_0001
-2412.34	83.469	-8.529	4.89	Q1_open_9_E1_44_71_19_100_0002_0001
-2401.22	98.565	-11.923	1.521	Q1_open_9_E1_44_71_1_100_0001_0001
-2403.96	122.619	-6.244	3.525	Q1_open_9_E1_44_71_1_100_0002_0001
-2412.5	107.603	-10.488	5.115	Q1_open_9_E1_44_71_20_100_0001_0001
-2403.52	177.105	-7.552	6.421	Q1_open_9_E1_44_71_20_100_0002_0001
-2466.44	195.495	-9.364	4.158	Q1_open_9_E1_44_71_2_100_0001_0001
-2409.9	123.155	-13.448	4.288	Q1_open_9_E1_44_71_2_100_0002_0001
-2410.94	904.986	-6.366	13.518	Q1_open_9_E1_44_71_3_100_0001_0001
-2433.88	311.561	-9.409	5.118	Q1_open_9_E1_44_71_3_100_0002_0001
-2391.12	352.383	-4.616	17.485	Q1_open_9_E1_44_71_4_100_0001_0001
-2429.41	82.028	-13.28	4.773	Q1_open_9_E1_44_71_4_100_0002_0001
-2469.49	118.681	-13.071	2.018	Q1_open_9_E1_44_71_5_100_0001_0001
-2398.14	144.995	-8.942	4.493	Q1_open_9_E1_44_71_5_100_0002_0001
-2447.69	201.794	-13.857	5.481	Q1_open_9_E1_44_71_6_100_0001_0001
-2410.77	119.756	-6.609	3.384	Q1_open_9_E1_44_71_6_100_0002_0001
-2402.06	205.138	-2.356	5.656	Q1_open_9_E1_44_71_7_100_0001_0001
-2467.99	238.96	-5.443	4.76	Q1_open_9_E1_44_71_7_100_0002_0001
-2380.84	142.866	-3.633	4.945	Q1_open_9_E1_44_71_8_100_0001_0001
-2397.42	264.072	-14.268	7.613	Q1_open_9_E1_44_71_8_100_0002_0001
-2412.82	198.597	-9.743	6.272	Q1_open_9_E1_44_71_9_100_0001_0001
-2381.09	64.351	-4.877	4.092	Q1_open_9_E1_44_71_9_100_0002_0001
-2387.8	188.994	-13.278	6.313	Q1_open_11_E1_44_71_10_10_0001_0001
-2397.11	109.016	-13.223	2.705	Q1_open_11_E1_44_71_10_10_0002_0001
-2266.21	1023	-6.001	10.187	Q1_open_11_E1_44_71_11_10_0001_0001
-2390.41	247.818	-8.227	5.185	Q1_open_11_E1_44_71_11_10_0002_0001
-2340.72	384.191	-8.469	6.789	Q1_open_11_E1_44_71_12_10_0001_0001
-2392.5	619.403	-10.316	15.197	Q1_open_11_E1_44_71_12_10_0002_0001
-2375.75	222.346	-0.619	4.866	Q1_open_11_E1_44_71_13_10_0001_0001
-2398.78	286.235	-2.87	5.49	Q1_open_11_E1_44_71_13_10_0002_0001
-2398.97	112.961	-12.143	4.513	Q1_open_11_E1_44_71_14_10_0001_0001
-2390.66	190.83	-9.849	5.18	Q1_open_11_E1_44_71_14_10_0002_0001
-2344.62	214.749	-11.452	5.934	Q1_open_11_E1_44_71_15_10_0001_0001
-2349.78	85.213	-8.464	4.716	Q1_open_11_E1_44_71_15_10_0002_0001
-2354.47	180.685	-5.426	10.13	Q1_open_11_E1_44_71_16_10_0001_0001
-2396.86	90.653	-9.841	3.227	Q1_open_11_E1_44_71_16_10_0002_0001
-2339.37	136.909	-11.445	4.323	Q1_open_11_E1_44_71_17_10_0001_0001
-2392.53	1479.29	-2.254	12.661	Q1_open_11_E1_44_71_17_10_0002_0001
-2396.84	100.751	-11.042	3.357	Q1_open_11_E1_44_71_18_10_0001_0001
-2402.49	332.866	-14.372	8.275	Q1_open_11_E1_44_71_18_10_0002_0001
-2368.57	316.301	-8.429	7.078	Q1_open_11_E1_44_71_19_10_0001_0001
-2401.55	185.714	-7.748	3.734	Q1_open_11_E1_44_71_19_10_0002_0001
-2373.17	278.205	-6.933	5.424	Q1_open_11_E1_44_71_1_10_0001_0001
-2401.47	501.488	-11.398	7.219	Q1_open_11_E1_44_71_1_10_0002_0001
-2384.01	271.784	-7.363	8.222	Q1_open_11_E1_44_71_20_10_0001_0001
-2403.65	126.803	-17.724	4.215	Q1_open_11_E1_44_71_20_10_0002_0001
-2380.78	102.916	-7.833	3.67	Q1_open_11_E1_44_71_2_10_0001_0001
-2384.4	81.548	-3.253	3.543	Q1_open_11_E1_44_71_2_10_0002_0001
-2388.44	598.169	-8.485	8.234	Q1_open_11_E1_44_71_3_10_0001_0001
-2394.95	96.969	-5.274	3.316	Q1_open_11_E1_44_71_3_10_0002_0001
-2353.62	429.36	-8.772	6.678	Q1_open_11_E1_44_71_4_10_0001_0001
-2386.59	117.511	-9.3	5.933	Q1_open_11_E1_44_71_4_10_0002_0001
-2315.97	319.188	-5.582	6.55	Q1_open_11_E1_44_71_5_10_0001_0001
-2477.02	174.343	-13.723	4.625	Q1_open_11_E1_44_71_5_10_0002_0001
-2372.82	150.836	-8.19	3.501	Q1_open_11_E1_44_71_6_10_0001_0001
-2359.45	134.687	-9.668	4.047	Q1_open_11_E1_44_71_6_10_0002_0001
-2399.29	141.362	-14.218	4.554	Q1_open_11_E1_44_71_7_10_0001_0001
-2386.65	295.789	-9.098	6.807	Q1_open_11_E1_44_71_7_10_0002_0001
-2374.35	150.538	-19.682	4.923	Q1_open_11_E1_44_71_8_10_0001_0001
-2410.38	238.687	-11.966	6.097	Q1_open_11_E1_44_71_8_10_0002_0001
-2438.7	362.331	-3.062	5.633	Q1_open_11_E1_44_71_9_10_0001_0001
-2452.54	547.939	-4.72	7.808	Q1_open_11_E1_44_71_9_10_0002_0001
-2464.9	472.108	-6.441	8.049	Q1_open_17_E1_44_71_10_10_0001_0001
-2393.87	193.782	-7.1	6.703	Q1_open_17_E1_44_71_10_10_0002_0001
-2565.73	188.257	-7.71	5.391	Q1_open_17_E1_44_71_11_10_0001_0001
-2442.45	107.135	-9.123	4.214	Q1_open_17_E1_44_71_11_10_0002_0001
-2248.29	547.044	-4.798	10.195	Q1_open_17_E1_44_71_12_10_0001_0001
-2456.85	110.789	-12.429	3.946	Q1_open_17_E1_44_71_12_10_0002_0001
-2412.7	436.932	-11.135	5.99	Q1_open_17_E1_44_71_13_10_0001_0001
-2371.38	161.418	-9.668	4.686	Q1_open_17_E1_44_71_13_10_0002_0001
-2456.54	326.346	-11.063	6.732	Q1_open_17_E1_44_71_14_10_0001_0001
-2461.87	435.717	-13.546	9.725	Q1_open_17_E1_44_71_14_10_0002_0001
-2427.34	459.707	-8.129	13.204	Q1_open_17_E1_44_71_15_10_0001_0001
-2458.19	100.016	-8.593	4.562	Q1_open_17_E1_44_71_15_10_0002_0001
-2467.01	193.454	-12.497	5.582	Q1_open_17_E1_44_71_16_10_0001_0001
-2430.61	432.166	-3.981	20.151	Q1_open_17_E1_44_71_16_10_0002_0001
-2464.09	186.896	-13.545	4.94	Q1_open_17_E1_44_71_17_10_0001_0001
-2540.01	200.524	-9.584	4.136	Q1_open_17_E1_44_71_17_10_0002_0001
-2542.87	261.987	-10.287	5.75	Q1_open_17_E1_44_71_18_10_0001_0001
-2460.41	87.536	-14.658	2.861	Q1_open_17_E1_44_71_18_10_0002_0001
-2463.35	622.471	-9.467	11.743	Q1_open_17_E1_44_71_19_10_0001_0001
-2462.11	83.411	-14.269	4.137	Q1_open_17_E1_44_71_19_10_0002_0001
-2445.74	299.972	-10.668	8.261	Q1_open_17_E1_44_71_1_10_0001_0001
-2467.89	70.357	-12.948	4.648	Q1_open_17_E1_44_71_1_10_0002_0001
-2545.58	122.425	-26.213	3.057	Q1_open_17_E1_44_71_20_10_0001_0001
-2527.83	243.516	-11.249	5.543	Q1_open_17_E1_44_71_20_10_0002_0001
-2485.19	239.11	-11.003	5.091	Q1_open_17_E1_44_71_2_10_0001_0001
-2490.14	53.272	-18.908	2.453	Q1_open_17_E1_44_71_2_10_0002_0001
-2448.22	80.387	-8.752	6.489	Q1_open_17_E1_44_71_3_10_0001_0001
-2467.27	44.558	-16.656	3.601	Q1_open_17_E1_44_71_3_10_0002_0001
-2463.45	123.295	-9.269	6.01	Q1_open_17_E1_44_71_4_10_0001_0001
-2476.29	48.754	-14.1	4.383	Q1_open_17_E1_44_71_4_10_0002_0001
-2534.05	430.556	-9.848	6.871	Q1_open_17_E1_44_71_5_10_0001_0001
-2470.91	271.006	-9.815	6.316	Q1_open_17_E1_44_71_5_10_0002_0001
-2472.14	204.839	-10.112	6.447	Q1_open_17_E1_44_71_6_10_0001_0001
-2468.15	616.724	-7.067	8.567	Q1_open_17_E1_44_71_6_10_0002_0001
-2471.47	66.457	-13.66	4.089	Q1_open_17_E1_44_71_7_10_0001_0001
-2454.29	72.767	-7.974	3.299	Q1_open_17_E1_44_71_7_10_0002_0001
-2558.27	136.657	-12.224	2.713	Q1_open_17_E1_44_71_8_10_0001_0001
-2472.2	84.104	-16.517	5.044	Q1_open_17_E1_44_71_8_10_0002_0001
-2452.28	60.473	-10.09	3.373	Q1_open_17_E1_44_71_9_10_0001_0001
-2474.91	62.457	-16.469	4.762	Q1_open_17_E1_44_71_9_10_0002_0001
-2399.8	407.522	-12.287	9.472	Q1_open_18_E1_44_71_10_10_0001_0001
-2373.35	104.318	-7.817	3.267	Q1_open_18_E1_44_71_10_10_0002_0001
-2350.56	110.983	-9.355	6.842	Q1_open_18_E1_44_71_11_10_0001_0001
-2384.3	186.94	-14.699	6.259	Q1_open_18_E1_44_71_11_10_0002_0001
-2408.07	98.758	-15.122	4.09	Q1_open_18_E1_44_71_12_10_0001_0001
-2390.94	103.967	-15.924	3.607	Q1_open_18_E1_44_71_12_10_0002_0001
-2360.35	61.978	-8.877	4.279	Q1_open_18_E1_44_71_13_10_0001_0001
-2333.26	191.54	-2.317	5.221	Q1_open_18_E1_44_71_13_10_0002_0001
-2469.73	243.35	-17.415	4.031	Q1_open_18_E1_44_71_14_10_0001_0001
-2420.81	101.241	-11	3.914	Q1_open_18_E1_44_71_14_10_0002_0001
-2360.36	152.538	-20.741	5.929	Q1_open_18_E1_44_71_15_10_0001_0001
-2212.57	284.205	-7.247	8.621	Q1_open_18_E1_44_71_15_10_0002_0001
-2445.07	368.357	-7.347	5.824	Q1_open_18_E1_44_71_16_10_0001_0001
-2388.94	81.252	-16.665	2.229	Q1_open_18_E1_44_71_16_10_0002_0001
-2420.3	240.657	-15.34	6.457	Q1_open_18_E1_44_71_17_10_0001_0001
-2370.34	232.879	-11.63	5.061	Q1_open_18_E1_44_71_17_10_0002_0001
-2414.94	761.856	-8.494	10.037	Q1_open_18_E1_44_71_18_10_0001_0001
-2425.08	116.204	-11.995	4.67	Q1_open_18_E1_44_71_18_10_0002_0001
-2252.01	261.646	-8.347	6.182	Q1_open_18_E1_44_71_19_10_0001_0001
-2427.44	803.51	-9.478	10.355	Q1_open_18_E1_44_71_19_10_0002_0001
-2419.73	257.58	-6.883	6.562	Q1_open_18_E1_44_71_1_10_0001_0001
-2390.07	292.992	-7.474	8.922	Q1_open_18_E1_44_71_1_10_0002_0001
-2385.73	185.087	-4.692	5.191	Q1_open_18_E1_44_71_20_10_0001_0001
-2392.35	198.852	-13.613	2.964	Q1_open_18_E1_44_71_20_10_0002_0001
-2366.3	113.9	-11.671	3.872	Q1_open_18_E1_44_71_2_10_0001_0001
-2273.34	64.277	-4.321	4.643	Q1_open_18_E1_44_71_2_10_0002_0001
-2363.64	500.301	-8.472	7.42	Q1_open_18_E1_44_71_3_10_0001_0001
-2416.8	174.528	-7.479	4.401	Q1_open_18_E1_44_71_3_10_0002_0001
-2420.52	213.873	-12.759	5.559	Q1_open_18_E1_44_71_4_10_0001_0001
-2408.64	180.227	-11.009	4.713	Q1_open_18_E1_44_71_4_10_0002_0001
-2296.86	202.842	-9.347	3.75	Q1_open_18_E1_44_71_5_10_0001_0001
-2429.36	213.76	-9.909	4.567	Q1_open_18_E1_44_71_5_10_0002_0001
-2394.21	271.036	-5.225	5.764	Q1_open_18_E1_44_71_6_10_0001_0001
-2437.74	93.952	-18.164	2.124	Q1_open_18_E1_44_71_6_10_0002_0001
-2378.28	522.512	-4.078	8.346	Q1_open_18_E1_44_71_7_10_0001_0001
-2409.89	94.818	-19.885	6.374	Q1_open_18_E1_44_71_7_10_0002_0001
-2406.36	480.605	-18.168	10.382	Q1_open_18_E1_44_71_8_10_0001_0001
-2414.53	260.435	-2.31	6.945	Q1_open_18_E1_44_71_8_10_0002_0001
-2319.65	554.966	-6.914	7.814	Q1_open_18_E1_44_71_9_10_0001_0001
-2434.68	384.466	-6.74	6.254	Q1_open_18_E1_44_71_9_10_0002_0001
-2245.6	154.83	-21.458	6.661	Q1_open_20_E1_44_71_10_10_0001_0001
-2254.18	858.943	-8.612	10.402	Q1_open_20_E1_44_71_10_10_0002_0001
-2255.23	175.105	-15.631	6.183	Q1_open_20_E1_44_71_11_10_0001_0001
-2253.28	84.877	-11.665	3.126	Q1_open_20_E1_44_71_11_10_0002_0001
-2242.37	115.165	-13.034	3.536	Q1_open_20_E1_44_71_12_10_0001_0001
-2261.04	119.657	-14.941	4.667	Q1_open_20_E1_44_71_12_10_0002_0001
-2254.09	142.726	-10.564	2.854	Q1_open_20_E1_44_71_13_10_0001_0001
-2242.48	133.518	-6.435	5.03	Q1_open_20_E1_44_71_13_10_0002_0001
-2261.65	86.337	-27.254	1.881	Q1_open_20_E1_44_71_14_10_0001_0001
-2254.34	113.591	-15.004	2.588	Q1_open_20_E1_44_71_14_10_0002_0001
-1275.41	119.537	-6.832	5.019	Q1_open_20_E1_44_71_15_10_0001_0001
-2246.58	158.31	-13.483	5.229	Q1_open_20_E1_44_71_15_10_0002_0001
-2260.91	142.121	-9.723	5.141	Q1_open_20_E1_44_71_16_10_0001_0001
-2249.22	396.704	-10.364	8.741	Q1_open_20_E1_44_71_16_10_0002_0001
-2259.5	82.253	-8.071	4.96	Q1_open_20_E1_44_71_17_10_0001_0001
-2246.67	135.531	-12.372	3.969	Q1_open_20_E1_44_71_17_10_0002_0001
-2230.53	342.429	-12.035	6.006	Q1_open_20_E1_44_71_18_10_0001_0001
-2263.76	113.375	-15.508	7.449	Q1_open_20_E1_44_71_18_10_0002_0001
-2242.72	245.429	-7.19	4.602	Q1_open_20_E1_44_71_19_10_0001_0001
-2240.31	219.876	-8.326	5.459	Q1_open_20_E1_44_71_19_10_0002_0001
-2251.38	299.594	-8.762	6.839	Q1_open_20_E1_44_71_1_10_0001_0001
-2254.53	207.308	-8.435	3.055	Q1_open_20_E1_44_71_1_10_0002_0001
-2257.81	346.097	-6.326	5.371	Q1_open_20_E1_44_71_20_10_0001_0001
-2258.36	237.691	-11.021	4.334	Q1_open_20_E1_44_71_20_10_0002_0001
-2257.8	113.118	-16.606	4.563	Q1_open_20_E1_44_71_2_10_0001_0001
-2240.01	123.789	-11.93	3.374	Q1_open_20_E1_44_71_2_10_0002_0001
-2187.47	265.526	-3.055	5.762	Q1_open_20_E1_44_71_3_10_0001_0001
-2256.96	120.37	-11.429	6.88	Q1_open_20_E1_44_71_3_10_0002_0001
-2251.46	528.026	-3.956	8.268	Q1_open_20_E1_44_71_4_10_0001_0001
-2281.79	296.048	-10.183	5.859	Q1_open_20_E1_44_71_4_10_0002_0001
-2255.41	104.881	-5.128	5.469	Q1_open_20_E1_44_71_5_10_0001_0001
-2260.7	148.406	-4.912	5.11	Q1_open_20_E1_44_71_5_10_0002_0001
-2244.23	122.121	-7.762	4.394	Q1_open_20_E1_44_71_6_10_0001_0001
-2247.25	176.509	-5.813	5.162	Q1_open_20_E1_44_71_6_10_0002_0001
-2249.84	441.514	-8.406	12.525	Q1_open_20_E1_44_71_7_10_0001_0001
-2243.9	69.255	-12.158	4.343	Q1_open_20_E1_44_71_7_10_0002_0001
-2247	156.146	-15.934	5.214	Q1_open_20_E1_44_71_8_10_0001_0001
-2237.69	348.746	-10.735	8.882	Q1_open_20_E1_44_71_8_10_0002_0001
-2269.57	92.104	-14.37	4.711	Q1_open_20_E1_44_71_9_10_0001_0001
-2250.69	240.07	-7.867	5.474	Q1_open_20_E1_44_71_9_10_0002_0001
-2457.84	188.668	-13.277	3.085	Q1_open_22_E1_44_71_10_10_0001_0001
-2391.26	210.648	-13.126	3.717	Q1_open_22_E1_44_71_10_10_0002_0001
-2235.68	303.101	-9.67	4.099	Q1_open_22_E1_44_71_11_10_0001_0001
-2314.05	875.021	-6.085	9.576	Q1_open_22_E1_44_71_11_10_0002_0001
-2387.58	58.485	-19.785	4.676	Q1_open_22_E1_44_71_12_10_0001_0001
-2269.1	102.09	-11.756	4.889	Q1_open_22_E1_44_71_12_10_0002_0001
-2336.21	114.238	-17.643	3.737	Q1_open_22_E1_44_71_13_10_0001_0001
-2311.89	184.224	-16.001	4.885	Q1_open_22_E1_44_71_13_10_0002_0001
-2251.94	73.539	-7.311	4.557	Q1_open_22_E1_44_71_14_10_0001_0001
-2369.91	67.152	-17.499	5.229	Q1_open_22_E1_44_71_14_10_0002_0001
-2306.07	460.067	-7.441	9.773	Q1_open_22_E1_44_71_15_10_0001_0001
-2247.2	178.763	-16.33	7.586	Q1_open_22_E1_44_71_15_10_0002_0001
-2310.91	51.751	-5.19	5.22	Q1_open_22_E1_44_71_16_10_0001_0001
-2317.51	66.893	-11.456	3.81	Q1_open_22_E1_44_71_16_10_0002_0001
-2308.71	143.293	-11.59	5.027	Q1_open_22_E1_44_71_17_10_0001_0001
-2282.38	436.042	-4.084	7.361	Q1_open_22_E1_44_71_17_10_0002_0001
-2305.6	255.786	-5.473	5.953	Q1_open_22_E1_44_71_18_10_0001_0001
-2262.38	86.413	-9.314	5.008	Q1_open_22_E1_44_71_18_10_0002_0001
-2325.82	208.947	-18.249	6.457	Q1_open_22_E1_44_71_19_10_0001_0001
-2330.51	69.413	-21.904	6.926	Q1_open_22_E1_44_71_19_10_0002_0001
-2305.52	116.229	-15.556	5.424	Q1_open_22_E1_44_71_1_10_0001_0001
-2300.66	115.494	-5.43	4.508	Q1_open_22_E1_44_71_1_10_0002_0001
-2301.53	478.196	-7.13	9.975	Q1_open_22_E1_44_71_20_10_0001_0001
-2259.18	105.834	-12.092	4.791	Q1_open_22_E1_44_71_20_10_0002_0001
-2306.04	175.89	-11.457	6.859	Q1_open_22_E1_44_71_2_10_0001_0001
-2300.37	69.008	-12.355	5.235	Q1_open_22_E1_44_71_2_10_0002_0001
-2386.08	167.302	-8.875	3.8	Q1_open_22_E1_44_71_3_10_0001_0001
-2469.73	247.219	-11.289	5.329	Q1_open_22_E1_44_71_3_10_0002_0001
-2246.4	474.825	-11.063	9.555	Q1_open_22_E1_44_71_4_10_0001_0001
-2078.96	560.306	-10.538	10.459	Q1_open_22_E1_44_71_4_10_0002_0001
-2326.07	295.231	-11.767	6.63	Q1_open_22_E1_44_71_5_10_0001_0001
-2295.86	198.27	-5.408	7.927	Q1_open_22_E1_44_71_5_10_0002_0001
-2309.16	10372.1	0	41.204	Q1_open_22_E1_44_71_6_10_0001_0001
-2305.39	143.481	-7.501	5.682	Q1_open_22_E1_44_71_6_10_0002_0001
-2368.28	104.781	-8.354	3.293	Q1_open_22_E1_44_71_7_10_0001_0001
-2326.44	311.281	-12.564	6.93	Q1_open_22_E1_44_71_7_10_0002_0001
-2316.82	748.811	-7.693	12.318	Q1_open_22_E1_44_71_8_10_0001_0001
-2312.86	328.878	-5.279	5.933	Q1_open_22_E1_44_71_8_10_0002_0001
-2390.99	229.909	-7.437	5.005	Q1_open_22_E1_44_71_9_10_0001_0001
-2275.55	441.221	-8.479	9.53	Q1_open_22_E1_44_71_9_10_0002_0001
-2716.99	240.763	-10.128	5.833	Q1_open_3_E1_44_71_10_10_0001_0001
-2709.1	212.51	-10.243	6.649	Q1_open_3_E1_44_71_10_10_0002_0001
-2697.07	129.335	-23.701	6.62	Q1_open_3_E1_44_71_11_10_0001_0001
-2711.06	221.906	-12.225	5.417	Q1_open_3_E1_44_71_11_10_0002_0001
-2719.68	209.159	-14.721	5.273	Q1_open_3_E1_44_71_12_10_0001_0001
-2705.5	121.253	-9.935	7.71	Q1_open_3_E1_44_71_12_10_0002_0001
-2696.28	191.03	-16.12	5.645	Q1_open_3_E1_44_71_13_10_0001_0001
-2703.43	144.392	-6.452	4.991	Q1_open_3_E1_44_71_13_10_0002_0001
-2660.8	151.237	-8.29	4.181	Q1_open_3_E1_44_71_14_10_0001_0001
-2692.95	69.297	-4.552	3.934	Q1_open_3_E1_44_71_14_10_0002_0001
-2552.53	211.373	-10.308	6.103	Q1_open_3_E1_44_71_15_10_0001_0001
-2676.18	217.551	-9	4.828	Q1_open_3_E1_44_71_15_10_0002_0001
-2747.08	125.638	-20.336	2.353	Q1_open_3_E1_44_71_16_10_0001_0001
-2702.32	229.755	-3.382	6.452	Q1_open_3_E1_44_71_16_10_0002_0001
-2708.81	158.674	-14.354	6.135	Q1_open_3_E1_44_71_17_10_0001_0001
-2713.64	245.184	-4.374	5.883	Q1_open_3_E1_44_71_17_10_0002_0001
-2718.27	232.149	-9.113	6.37	Q1_open_3_E1_44_71_18_10_0001_0001
-2718.64	86.417	-9.763	6.139	Q1_open_3_E1_44_71_18_10_0002_0001
-2736.36	181.782	-6.775	5.432	Q1_open_3_E1_44_71_19_10_0001_0001
-2721.33	220.888	-10.247	6.437	Q1_open_3_E1_44_71_19_10_0002_0001
-2699.65	103.675	-16.962	1.95	Q1_open_3_E1_44_71_1_10_0001_0001
-2725.45	147.98	-4.386	3.75	Q1_open_3_E1_44_71_1_10_0002_0001
-2740.82	136.328	-12.564	4.902	Q1_open_3_E1_44_71_20_10_0001_0001
-2701.73	2746.84	-0.306	19.297	Q1_open_3_E1_44_71_20_10_0002_0001
-2690.96	95.582	-3.368	3.696	Q1_open_3_E1_44_71_2_10_0001_0001
-2695.32	94.666	-14.19	3.731	Q1_open_3_E1_44_71_2_10_0002_0001
-2723.38	224.168	-20.123	6.22	Q1_open_3_E1_44_71_3_10_0001_0001
-2722.2	83.951	-14.628	4.358	Q1_open_3_E1_44_71_3_10_0002_0001
-2709.13	161.845	-6.247	5.146	Q1_open_3_E1_44_71_4_10_0001_0001
-2714.86	195.596	-13.743	5.617	Q1_open_3_E1_44_71_4_10_0002_0001
-2732.84	208.478	-8.513	5.677	Q1_open_3_E1_44_71_5_10_0001_0001
-2721.03	432.512	-10.967	6.713	Q1_open_3_E1_44_71_5_10_0002_0001
-2669.59	192.856	-5.185	5.019	Q1_open_3_E1_44_71_6_10_0001_0001
-2722.6	99.762	-19.426	7.209	Q1_open_3_E1_44_71_6_10_0002_0001
-2669.94	161.805	-7.286	8.939	Q1_open_3_E1_44_71_7_10_0001_0001
-2710.6	219.348	-10.125	4.991	Q1_open_3_E1_44_71_7_10_0002_0001
-2707.65	1269.18	-7.432	10.986	Q1_open_3_E1_44_71_8_10_0001_0001
-2711.95	189.352	-9.265	5.588	Q1_open_3_E1_44_71_8_10_0002_0001
-2679.62	146.868	-6.602	4.902	Q1_open_3_E1_44_71_9_10_0001_0001
-2722.53	114.434	-13.193	5.165	Q1_open_3_E1_44_71_9_10_0002_0001
-3305.87	269.272	-10.437	4.844	Q1_open_6_E1_44_71_10_10_0001_0001
-3334.07	143.142	-14.684	3.119	Q1_open_6_E1_44_71_10_10_0002_0001
-3274.1	182.286	-1.457	4.037	Q1_open_6_E1_44_71_11_10_0001_0001
-3295.53	611.169	-2.891	9.819	Q1_open_6_E1_44_71_11_10_0002_0001
-3279.66	637.176	-6.505	9.247	Q1_open_6_E1_44_71_12_10_0001_0001
-3260.77	250.615	-14.302	9.135	Q1_open_6_E1_44_71_12_10_0002_0001
-3282.03	97.181	-11.878	3.118	Q1_open_6_E1_44_71_13_10_0001_0001
-3289.32	115.547	-8.825	5.515	Q1_open_6_E1_44_71_13_10_0002_0001
-3298.52	1260.83	-4.704	12.986	Q1_open_6_E1_44_71_14_10_0001_0001
-3286.6	160.442	-11.789	6.909	Q1_open_6_E1_44_71_14_10_0002_0001
-3327.55	167.062	-14.964	6.43	Q1_open_6_E1_44_71_15_10_0001_0001
-3323.72	119.604	-10.338	3.92	Q1_open_6_E1_44_71_15_10_0002_0001
-3329.55	170.586	-15.553	6.352	Q1_open_6_E1_44_71_16_10_0001_0001
-3325.81	134.892	-6.389	5.33	Q1_open_6_E1_44_71_16_10_0002_0001
-3325.08	215.352	-4.67	5.837	Q1_open_6_E1_44_71_17_10_0001_0001
-3304.49	246.968	-14.087	6.062	Q1_open_6_E1_44_71_17_10_0002_0001
-3233.6	23793.4	0	43.632	Q1_open_6_E1_44_71_18_10_0001_0001
-3326.11	313.219	-7.733	6.514	Q1_open_6_E1_44_71_18_10_0002_0001
-3292.47	112.323	-6.783	5.794	Q1_open_6_E1_44_71_19_10_0001_0001
-3336.87	127.273	-12.792	3.391	Q1_open_6_E1_44_71_19_10_0002_0001
-3311.71	91.879	-2.284	4.868	Q1_open_6_E1_44_71_1_10_0001_0001
-3334.63	158.011	-11.262	3.29	Q1_open_6_E1_44_71_1_10_0002_0001
-3293.69	474.461	-13.282	8.378	Q1_open_6_E1_44_71_20_10_0001_0001
-3292.94	101.281	-14.383	4.795	Q1_open_6_E1_44_71_20_10_0002_0001
-3228.63	90.46	-9.838	6.536	Q1_open_6_E1_44_71_2_10_0001_0001
-3283.35	76.816	-12.325	3.089	Q1_open_6_E1_44_71_2_10_0002_0001
-3320.61	159.156	-11.982	4.957	Q1_open_6_E1_44_71_3_10_0001_0001
-3331.11	254.802	-9.063	4.185	Q1_open_6_E1_44_71_3_10_0002_0001
-3332.48	484.053	-10.995	9.696	Q1_open_6_E1_44_71_4_10_0001_0001
-3329.16	114.315	-8.301	4.623	Q1_open_6_E1_44_71_4_10_0002_0001
-3292.62	253.372	-4.416	4.88	Q1_open_6_E1_44_71_5_10_0001_0001
-3324.91	199.599	-7.93	5.35	Q1_open_6_E1_44_71_5_10_0002_0001
-3300.69	387.887	-4.447	6.596	Q1_open_6_E1_44_71_6_10_0001_0001
-3315.71	126.534	-2.794	5.114	Q1_open_6_E1_44_71_6_10_0002_0001
-3231.59	471.82	-4.033	8.25	Q1_open_6_E1_44_71_7_10_0001_0001
-3301.05	795.822	-5.843	12.297	Q1_open_6_E1_44_71_7_10_0002_0001
-3295.1	149.344	-12.555	5.18	Q1_open_6_E1_44_71_8_10_0001_0001
-3285.93	175.952	-8.39	6.813	Q1_open_6_E1_44_71_8_10_0002_0001
-3196.21	578.871	-11.162	8.324	Q1_open_6_E1_44_71_9_10_0001_0001
-3328.72	452.047	-4.972	6.054	Q1_open_6_E1_44_71_9_10_0002_0001
-2402.22	87.359	-11.937	1.856	Q1_open_9_E1_44_71_10_10_0001_0001
-2408.83	183.035	-6.605	4.599	Q1_open_9_E1_44_71_10_10_0002_0001
-2399.91	154.833	-15.37	7.634	Q1_open_9_E1_44_71_11_10_0001_0001
-2407.14	336.223	-11.357	9.056	Q1_open_9_E1_44_71_11_10_0002_0001
-2416.08	211.424	-10.496	5.685	Q1_open_9_E1_44_71_12_10_0001_0001
-2375.75	117.715	-8.364	4.608	Q1_open_9_E1_44_71_12_10_0002_0001
-2432.6	148.412	-14.59	6.173	Q1_open_9_E1_44_71_13_10_0001_0001
-2394.66	108.578	-10.258	3.436	Q1_open_9_E1_44_71_13_10_0002_0001
-2419.57	111.627	-11.708	5.222	Q1_open_9_E1_44_71_14_10_0001_0001
-2422.6	80.835	-12.341	4.822	Q1_open_9_E1_44_71_14_10_0002_0001
-2411.92	166.946	-8.893	7.461	Q1_open_9_E1_44_71_15_10_0001_0001
-2394.64	79.452	-6.547	3.485	Q1_open_9_E1_44_71_15_10_0002_0001
-2367.53	600.092	-2.813	8.167	Q1_open_9_E1_44_71_16_10_0001_0001
-2419.4	128.628	-12.828	6.291	Q1_open_9_E1_44_71_16_10_0002_0001
-2405.43	206.156	-8.976	6.014	Q1_open_9_E1_44_71_17_10_0001_0001
-2395.39	159.629	-2.068	5.425	Q1_open_9_E1_44_71_17_10_0002_0001
-2370.76	104.551	-8.234	4.772	Q1_open_9_E1_44_71_18_10_0001_0001
-2418.05	477.664	-15.891	8.915	Q1_open_9_E1_44_71_18_10_0002_0001
-2403.19	152.165	-10.629	4.969	Q1_open_9_E1_44_71_19_10_0001_0001
-2391.1	482.789	-7.456	9.167	Q1_open_9_E1_44_71_19_10_0002_0001
-2408.36	484.066	-6.643	10.917	Q1_open_9_E1_44_71_1_10_0001_0001
-2474.24	88.034	-16.356	1.594	Q1_open_9_E1_44_71_1_10_0002_0001
-2425.64	220.257	-14.911	8.302	Q1_open_9_E1_44_71_20_10_0001_0001
-2396.02	64.033	-10.871	4.374	Q1_open_9_E1_44_71_20_10_0002_0001
-2404.77	108.862	-13.232	3.355	Q1_open_9_E1_44_71_2_10_0001_0001
-2305.67	724.167	-4.836	8.914	Q1_open_9_E1_44_71_2_10_0002_0001
-2398.48	180.418	-7.139	4.913	Q1_open_9_E1_44_71_3_10_0001_0001
-2405.34	201.311	-6.519	5.736	Q1_open_9_E1_44_71_3_10_0002_0001
-2404.67	170.228	-3.98	5.925	Q1_open_9_E1_44_71_4_10_0001_0001
-2388.79	286.868	-5.793	6.162	Q1_open_9_E1_44_71_4_10_0002_0001
-2370.13	253.755	-4.931	12.007	Q1_open_9_E1_44_71_5_10_0001_0001
-2396.39	197.452	-6.267	4.174	Q1_open_9_E1_44_71_5_10_0002_0001
-2470.26	246.29	-14.342	6.122	Q1_open_9_E1_44_71_6_10_0001_0001
-2408.6	113.732	-7.876	3.681	Q1_open_9_E1_44_71_6_10_0002_0001
-2458.65	103.645	-10.192	2.385	Q1_open_9_E1_44_71_7_10_0001_0001
-2399.9	292.648	-10.173	10.126	Q1_open_9_E1_44_71_7_10_0002_0001
-2427.52	422.707	-9.177	8.032	Q1_open_9_E1_44_71_8_10_0001_0001
-2404.1	100.674	-5.482	3.49	Q1_open_9_E1_44_71_8_10_0002_0001
-2397.79	182.611	-5.996	4.281	Q1_open_9_E1_44_71_9_10_0001_0001
-2404.32	91.385	-8.943	6.235	Q1_open_9_E1_44_71_9_10_0002_0001
-2318.39	167.096	-5.832	3.948	Q1_open_11_E1_44_71_10_11_0001_0001
-2394.78	89.294	-10.395	4.122	Q1_open_11_E1_44_71_10_11_0002_0001
-2397.06	162.912	-14.782	6.091	Q1_open_11_E1_44_71_11_11_0001_0001
-2314.24	453.431	-7.719	9.415	Q1_open_11_E1_44_71_11_11_0002_0001
-2390.87	89.315	-12.596	2.817	Q1_open_11_E1_44_71_12_11_0001_0001
-2453.99	268.908	-16.324	4.477	Q1_open_11_E1_44_71_12_11_0002_0001
-2369.13	378.243	-7.609	6.968	Q1_open_11_E1_44_71_13_11_0001_0001
-2388.62	189.007	-5.055	8.491	Q1_open_11_E1_44_71_13_11_0002_0001
-2381.77	105.071	-8.367	3.818	Q1_open_11_E1_44_71_14_11_0001_0001
-2382	164.809	-17.704	2.615	Q1_open_11_E1_44_71_14_11_0002_0001
-2367.66	108.892	-12.748	3.474	Q1_open_11_E1_44_71_15_11_0001_0001
-2379.8	242.415	-16.71	7.888	Q1_open_11_E1_44_71_15_11_0002_0001
-2338.93	995.523	-6.949	9.159	Q1_open_11_E1_44_71_16_11_0001_0001
-2382.49	328.663	-2.709	7.75	Q1_open_11_E1_44_71_16_11_0002_0001
-2442.2	252.915	-6.719	4.814	Q1_open_11_E1_44_71_17_11_0001_0001
-2394.52	376.334	-21.094	8.498	Q1_open_11_E1_44_71_17_11_0002_0001
-2390.2	236.912	-8.276	5.66	Q1_open_11_E1_44_71_18_11_0001_0001
-2397.19	124.898	-9.567	2.842	Q1_open_11_E1_44_71_18_11_0002_0001
-2399.22	105.42	-12.249	3.898	Q1_open_11_E1_44_71_19_11_0001_0001
-2124.86	260.673	-8.451	5.646	Q1_open_11_E1_44_71_19_11_0002_0001
-2383.72	269.336	-16.035	5.842	Q1_open_11_E1_44_71_1_11_0001_0001
-2390.53	883.211	-2.698	10.324	Q1_open_11_E1_44_71_1_11_0002_0001
-2374.61	263.225	-8.735	5.87	Q1_open_11_E1_44_71_20_11_0001_0001
-2351.46	122.984	-7.615	4.024	Q1_open_11_E1_44_71_20_11_0002_0001
-2364.48	102.109	-11.871	6.241	Q1_open_11_E1_44_71_2_11_0001_0001
-2387.84	89.669	-8.683	3.426	Q1_open_11_E1_44_71_2_11_0002_0001
-2481.05	311.276	-16.714	4.755	Q1_open_11_E1_44_71_3_11_0001_0001
-2335.05	205.878	-7.407	4.738	Q1_open_11_E1_44_71_3_11_0002_0001
-2409.24	194.457	-10.353	4.853	Q1_open_11_E1_44_71_4_11_0001_0001
-2402.39	206.347	-11.18	6.759	Q1_open_11_E1_44_71_4_11_0002_0001
-2330.04	139.006	-12.553	9.236	Q1_open_11_E1_44_71_5_11_0001_0001
-2437.06	358.396	-7.114	5.846	Q1_open_11_E1_44_71_5_11_0002_0001
-2328.15	308.851	-8.949	5.027	Q1_open_11_E1_44_71_6_11_0001_0001
-2341.94	94.801	-13.844	7.668	Q1_open_11_E1_44_71_6_11_0002_0001
-2392.75	221.922	-8.134	6.34	Q1_open_11_E1_44_71_7_11_0001_0001
-2364.76	170.873	-8.611	6.258	Q1_open_11_E1_44_71_7_11_0002_0001
-2418.29	428.997	-9.172	8.64	Q1_open_11_E1_44_71_8_11_0001_0001
-2333.99	144.181	-7.286	3.041	Q1_open_11_E1_44_71_8_11_0002_0001
-2458.33	200.787	-15.348	3.423	Q1_open_11_E1_44_71_9_11_0001_0001
-2403.14	268.484	-9.948	5.364	Q1_open_11_E1_44_71_9_11_0002_0001
-2338.36	78.154	-10.601	5.882	Q1_open_17_E1_44_71_10_11_0001_0001
-2462.8	119.523	-11.297	7.379	Q1_open_17_E1_44_71_10_11_0002_0001
-2454.19	401.866	-12.44	9.551	Q1_open_17_E1_44_71_11_11_0001_0001
-2452.97	271.754	-2.408	6.386	Q1_open_17_E1_44_71_11_11_0002_0001
-2402.1	312.826	-3.974	6.89	Q1_open_17_E1_44_71_12_11_0001_0001
-2439.97	255.677	-9.678	7.91	Q1_open_17_E1_44_71_12_11_0002_0001
-2537.73	537.336	-11.719	7.758	Q1_open_17_E1_44_71_13_11_0001_0001
-2460.91	56.096	-16.845	6.511	Q1_open_17_E1_44_71_13_11_0002_0001
-2465.09	388.989	-12.373	11.722	Q1_open_17_E1_44_71_14_11_0001_0001
-2452.41	51.84	-7.118	4.012	Q1_open_17_E1_44_71_14_11_0002_0001
-2456.33	93.324	-12.103	3.79	Q1_open_17_E1_44_71_15_11_0001_0001
-2461.5	124.583	-1.849	5.119	Q1_open_17_E1_44_71_15_11_0002_0001
-2454.57	107.996	-7.763	3.575	Q1_open_17_E1_44_71_16_11_0001_0001
-2463.03	72.22	-9.757	3.35	Q1_open_17_E1_44_71_16_11_0002_0001
-2461.36	174	-13.999	6.43	Q1_open_17_E1_44_71_17_11_0001_0001
-2486.49	282.649	-5.54	6.764	Q1_open_17_E1_44_71_17_11_0002_0001
-2554.21	139.115	-13.223	3.082	Q1_open_17_E1_44_71_18_11_0001_0001
-2460.39	119.535	-2.935	4.414	Q1_open_17_E1_44_71_18_11_0002_0001
-2440.57	210.932	-6.818	5.823	Q1_open_17_E1_44_71_19_11_0001_0001
-2463.46	70.262	-11.623	4.567	Q1_open_17_E1_44_71_19_11_0002_0001
-2484.02	58.424	-15.352	2.612	Q1_open_17_E1_44_71_1_11_0001_0001
-2469.77	107.844	-10.309	4.284	Q1_open_17_E1_44_71_1_11_0002_0001
-2543.52	163.33	-16.204	3.394	Q1_open_17_E1_44_71_20_11_0001_0001
-2465.89	42.97	-8.899	4.11	Q1_open_17_E1_44_71_20_11_0002_0001
-2482.92	395.532	-15.458	8.294	Q1_open_17_E1_44_71_2_11_0001_0001
-2438.01	83.986	-10.072	6.078	Q1_open_17_E1_44_71_2_11_0002_0001
-2535.86	373.595	-5.255	6.907	Q1_open_17_E1_44_71_3_11_0001_0001
-2415.06	372.359	-1.501	9.007	Q1_open_17_E1_44_71_3_11_0002_0001
-2455.08	127.463	-13.339	3.33	Q1_open_17_E1_44_71_4_11_0001_0001
-2477.46	167.272	-13.021	5.506	Q1_open_17_E1_44_71_4_11_0002_0001
-2394.96	1798.34	-0.951	19.82	Q1_open_17_E1_44_71_5_11_0001_0001
-2458.53	92.624	-9.55	3.18	Q1_open_17_E1_44_71_5_11_0002_0001
-2401.7	326.297	-11.317	6.989	Q1_open_17_E1_44_71_6_11_0001_0001
-2459.49	74.414	-11.165	4.432	Q1_open_17_E1_44_71_6_11_0002_0001
-2398.42	92.686	-11.677	7.591	Q1_open_17_E1_44_71_7_11_0001_0001
-2460.55	73.346	-5.885	3.161	Q1_open_17_E1_44_71_7_11_0002_0001
-2556.85	151.806	-13.191	3.589	Q1_open_17_E1_44_71_8_11_0001_0001
-2555.57	95.486	-14.851	3.286	Q1_open_17_E1_44_71_8_11_0002_0001
-2543.98	3676.02	-6.17	16.873	Q1_open_17_E1_44_71_9_11_0001_0001
-2465.65	53.377	-16.407	4.295	Q1_open_17_E1_44_71_9_11_0002_0001
-2425.29	145.404	-14.423	4.385	Q1_open_18_E1_44_71_10_11_0001_0001
-2372.65	186.45	-11.341	5.147	Q1_open_18_E1_44_71_10_11_0002_0001
-2219.35	385.903	-9.54	8.554	Q1_open_18_E1_44_71_11_11_0001_0001
-2399.84	481.381	-14.566	9.536	Q1_open_18_E1_44_71_11_11_0002_0001
-2395.23	352.149	-6.958	6.715	Q1_open_18_E1_44_71_12_11_0001_0001
-2394.8	214.136	-12.5	6.587	Q1_open_18_E1_44_71_12_11_0002_0001
-2350.8	444.974	-10.152	9.571	Q1_open_18_E1_44_71_13_11_0001_0001
-2388.28	231.664	-6.588	6.792	Q1_open_18_E1_44_71_13_11_0002_0001
-2429.26	112.894	-19.848	1.555	Q1_open_18_E1_44_71_14_11_0001_0001
-715.388	709.057	-0.043	17.407	Q1_open_18_E1_44_71_14_11_0002_0001
-2366.07	101.844	-14.141	2.979	Q1_open_18_E1_44_71_15_11_0001_0001
-2409.65	199.965	-15.05	6.627	Q1_open_18_E1_44_71_15_11_0002_0001
-2409.44	115.697	-16.136	7.319	Q1_open_18_E1_44_71_16_11_0001_0001
-2416.87	764.351	-4.273	8.577	Q1_open_18_E1_44_71_16_11_0002_0001
-2396.87	102.5	-12.861	7.708	Q1_open_18_E1_44_71_17_11_0001_0001
-2387.16	121.545	-15.856	2.444	Q1_open_18_E1_44_71_17_11_0002_0001
-2387.33	267.441	-8.324	5.543	Q1_open_18_E1_44_71_18_11_0001_0001
-2389.79	184.849	-7.365	4.77	Q1_open_18_E1_44_71_18_11_0002_0001
-2392.31	481.602	-4.192	10.332	Q1_open_18_E1_44_71_19_11_0001_0001
-2424.35	108.588	-11.592	3.753	Q1_open_18_E1_44_71_19_11_0002_0001
-2373.5	184.31	1.622	4.356	Q1_open_18_E1_44_71_1_11_0001_0001
-2431.48	136.467	-12.855	4.841	Q1_open_18_E1_44_71_1_11_0002_0001
-2371.63	305.952	-7.432	10.048	Q1_open_18_E1_44_71_20_11_0001_0001
-2409.79	113.859	-9.823	3.503	Q1_open_18_E1_44_71_20_11_0002_0001
-2371.52	121.345	-13.384	5.108	Q1_open_18_E1_44_71_2_11_0001_0001
-2394.51	148.552	-10.287	5.423	Q1_open_18_E1_44_71_2_11_0002_0001
-2411.36	156.503	-10.857	5.589	Q1_open_18_E1_44_71_3_11_0001_0001
-2376.12	304.279	-11.201	8.633	Q1_open_18_E1_44_71_3_11_0002_0001
-2383.34	180.311	-9.824	4.45	Q1_open_18_E1_44_71_4_11_0001_0001
-2429.88	110.817	-10.627	3.051	Q1_open_18_E1_44_71_4_11_0002_0001
-2293.45	155.195	-2.193	4.942	Q1_open_18_E1_44_71_5_11_0001_0001
-2395.24	1566.5	-6.109	11.59	Q1_open_18_E1_44_71_5_11_0002_0001
-2376.48	279.964	-6.41	6.011	Q1_open_18_E1_44_71_6_11_0001_0001
-2419.12	227.179	-8.185	5.547	Q1_open_18_E1_44_71_6_11_0002_0001
-2409.17	112.555	-10.609	6.805	Q1_open_18_E1_44_71_7_11_0001_0001
-2380.33	64.789	-10.108	3.732	Q1_open_18_E1_44_71_7_11_0002_0001
-2387.76	251.476	-6.271	5.306	Q1_open_18_E1_44_71_8_11_0001_0001
-2386.52	153.184	-13.807	7.536	Q1_open_18_E1_44_71_8_11_0002_0001
-2497.76	306.799	-13.274	5.061	Q1_open_18_E1_44_71_9_11_0001_0001
-2425.86	115.088	-9.557	4.527	Q1_open_18_E1_44_71_9_11_0002_0001
-2233.31	182.137	-19.554	6.602	Q1_open_20_E1_44_71_10_11_0001_0001
-2192.98	219.702	-4.612	5.488	Q1_open_20_E1_44_71_10_11_0002_0001
-1535.82	92584	0	114.806	Q1_open_20_E1_44_71_11_11_0001_0001
-2243.58	94.398	-3.985	4.827	Q1_open_20_E1_44_71_11_11_0002_0001
-2218.61	360.267	-3.71	14.08	Q1_open_20_E1_44_71_12_11_0001_0001
-2251.73	305.61	-11.374	5.151	Q1_open_20_E1_44_71_12_11_0002_0001
-2278.39	533.77	-9.057	7.717	Q1_open_20_E1_44_71_13_11_0001_0001
-2272.06	205.62	-9.167	5.52	Q1_open_20_E1_44_71_13_11_0002_0001
-2244.92	78.687	-9.427	2.798	Q1_open_20_E1_44_71_14_11_0001_0001
-2253.51	187.125	-9.615	5.302	Q1_open_20_E1_44_71_14_11_0002_0001
-2237.68	201.472	-8.434	6.59	Q1_open_20_E1_44_71_15_11_0001_0001
-2020.29	160.292	-5.635	9.634	Q1_open_20_E1_44_71_15_11_0002_0001
-2217.25	200.367	-6.744	4.283	Q1_open_20_E1_44_71_16_11_0001_0001
-2269	124.299	-14.611	5.672	Q1_open_20_E1_44_71_16_11_0002_0001
-2249.03	677.994	-10.106	16.455	Q1_open_20_E1_44_71_17_11_0001_0001
-2247.27	80.228	-8.075	4.764	Q1_open_20_E1_44_71_17_11_0002_0001
-2246.25	216.696	-15.497	6.784	Q1_open_20_E1_44_71_18_11_0001_0001
-2246.3	290.724	-18.57	8.295	Q1_open_20_E1_44_71_18_11_0002_0001
-2252.72	116.765	-10.059	3.966	Q1_open_20_E1_44_71_19_11_0001_0001
-2226.73	93.202	-9.403	6.872	Q1_open_20_E1_44_71_19_11_0002_0001
-2273.85	224.308	-5.059	4.515	Q1_open_20_E1_44_71_1_11_0001_0001
-2247.52	92.876	-8.373	4.196	Q1_open_20_E1_44_71_1_11_0002_0001
-2190.64	520.433	-2.283	7.092	Q1_open_20_E1_44_71_20_11_0001_0001
-2255.45	192.802	-16.965	5.298	Q1_open_20_E1_44_71_20_11_0002_0001
-2284.18	92.616	-6.655	2.33	Q1_open_20_E1_44_71_2_11_0001_0001
-2243.4	149.518	-6.512	3.804	Q1_open_20_E1_44_71_2_11_0002_0001
-2256.13	176.302	-9.426	6.923	Q1_open_20_E1_44_71_3_11_0001_0001
-2270.06	90.842	-16.218	4.883	Q1_open_20_E1_44_71_3_11_0002_0001
-2251.28	193.86	-4.519	5.023	Q1_open_20_E1_44_71_4_11_0001_0001
-2255.96	71.154	-10.944	4.541	Q1_open_20_E1_44_71_4_11_0002_0001
-2241.13	203.387	-6.863	4.444	Q1_open_20_E1_44_71_5_11_0001_0001
-2254.55	541.577	-11.779	11.576	Q1_open_20_E1_44_71_5_11_0002_0001
-2219.88	700.533	-4.776	9.847	Q1_open_20_E1_44_71_6_11_0001_0001
-2113.93	941.676	-5.313	8.433	Q1_open_20_E1_44_71_6_11_0002_0001
-2252.18	232.631	-5.221	6.963	Q1_open_20_E1_44_71_7_11_0001_0001
-2266.11	240.264	-12.399	4.036	Q1_open_20_E1_44_71_7_11_0002_0001
-2225.71	349.616	-8.159	11.377	Q1_open_20_E1_44_71_8_11_0001_0001
-2256.74	141.441	-9.507	3.932	Q1_open_20_E1_44_71_8_11_0002_0001
-2253.97	135.616	-5.778	3.708	Q1_open_20_E1_44_71_9_11_0001_0001
-2216.88	212.302	-7.188	6.789	Q1_open_20_E1_44_71_9_11_0002_0001
-2329.24	120.027	-11.893	4.693	Q1_open_22_E1_44_71_10_11_0001_0001
-2311.06	89.916	-13.376	4.583	Q1_open_22_E1_44_71_10_11_0002_0001
-2323.58	102.165	-20.325	6.568	Q1_open_22_E1_44_71_11_11_0001_0001
-2331.76	130.819	-11.312	4.789	Q1_open_22_E1_44_71_11_11_0002_0001
-2386.61	126.469	-16.81	2.873	Q1_open_22_E1_44_71_12_11_0001_0001
-2318.75	93.765	-18.413	5.787	Q1_open_22_E1_44_71_12_11_0002_0001
-2283.63	214.622	-11.231	6.921	Q1_open_22_E1_44_71_13_11_0001_0001
-2315.86	454.974	-8.382	8.875	Q1_open_22_E1_44_71_13_11_0002_0001
-2222.3	803.332	-1.681	16.304	Q1_open_22_E1_44_71_14_11_0001_0001
-2367.39	49.177	-10.101	3.195	Q1_open_22_E1_44_71_14_11_0002_0001
-2303.43	171.208	-10.301	9.3	Q1_open_22_E1_44_71_15_11_0001_0001
-2371.4	249.289	-8.378	5.707	Q1_open_22_E1_44_71_15_11_0002_0001
-2366.99	213.191	-10.1	5.987	Q1_open_22_E1_44_71_16_11_0001_0001
-2305.89	56.022	-7.657	4.75	Q1_open_22_E1_44_71_16_11_0002_0001
-2297.3	153.033	-7.371	10.076	Q1_open_22_E1_44_71_17_11_0001_0001
-2315.61	386.858	-14.913	8.555	Q1_open_22_E1_44_71_17_11_0002_0001
-2398.9	202.803	-4.925	5.231	Q1_open_22_E1_44_71_18_11_0001_0001
-2310.64	86.902	-12.438	1.959	Q1_open_22_E1_44_71_18_11_0002_0001
-2359.47	676.429	-13.53	10.251	Q1_open_22_E1_44_71_19_11_0001_0001
-2314.69	457.156	-8.753	10.669	Q1_open_22_E1_44_71_19_11_0002_0001
-2352.52	55.649	-12.875	3.692	Q1_open_22_E1_44_71_1_11_0001_0001
-2389.53	168.225	-11.483	3.033	Q1_open_22_E1_44_71_1_11_0002_0001
-2318.66	133.821	-10.129	5.126	Q1_open_22_E1_44_71_20_11_0001_0001
-2315.74	146.092	-4.062	6.066	Q1_open_22_E1_44_71_20_11_0002_0001
-2288.7	220.617	-6.817	6.493	Q1_open_22_E1_44_71_2_11_0001_0001
-2378.43	35.517	-19.259	3.343	Q1_open_22_E1_44_71_2_11_0002_0001
-2391.09	109.519	-4.774	3.417	Q1_open_22_E1_44_71_3_11_0001_0001
-2309.4	319.981	-5.669	7.839	Q1_open_22_E1_44_71_3_11_0002_0001
-2335.82	91.608	-14.153	5.127	Q1_open_22_E1_44_71_4_11_0001_0001
-2135.3	104.629	-3.974	5.596	Q1_open_22_E1_44_71_4_11_0002_0001
-2312.72	221.113	-6.748	6.895	Q1_open_22_E1_44_71_5_11_0001_0001
-2317.9	136.396	-11.743	6.091	Q1_open_22_E1_44_71_5_11_0002_0001
-1765.22	272.959	-7.186	7.945	Q1_open_22_E1_44_71_6_11_0001_0001
-2307.64	140.111	-5.516	3.811	Q1_open_22_E1_44_71_6_11_0002_0001
-2308	298.574	-1.678	8.963	Q1_open_22_E1_44_71_7_11_0001_0001
-2325.51	85.087	-9.847	4.907	Q1_open_22_E1_44_71_7_11_0002_0001
-2355.15	110.839	-14.951	6.441	Q1_open_22_E1_44_71_8_11_0001_0001
-2322.94	47.591	-10.964	4.88	Q1_open_22_E1_44_71_8_11_0002_0001
-2288.37	219.883	-4.595	6.36	Q1_open_22_E1_44_71_9_11_0001_0001
-2313.21	53.184	-10.834	4.14	Q1_open_22_E1_44_71_9_11_0002_0001
-2693.57	268.201	-10.004	6.692	Q1_open_3_E1_44_71_10_11_0001_0001
-2719.63	102.781	-14.993	5.324	Q1_open_3_E1_44_71_10_11_0002_0001
-2696.1	225.017	-8.298	5.553	Q1_open_3_E1_44_71_11_11_0001_0001
-2709.18	417.089	-8.507	6.246	Q1_open_3_E1_44_71_11_11_0002_0001
-2689.08	223.823	-14.222	6.733	Q1_open_3_E1_44_71_12_11_0001_0001
-2695.25	113.381	-11.476	2.84	Q1_open_3_E1_44_71_12_11_0002_0001
-2697.64	594.383	-4.62	10.249	Q1_open_3_E1_44_71_13_11_0001_0001
-2702.3	77.975	-15.1	3.104	Q1_open_3_E1_44_71_13_11_0002_0001
-2702.11	186.274	-11.662	4.373	Q1_open_3_E1_44_71_14_11_0001_0001
-2707.86	159.321	-17.788	5.204	Q1_open_3_E1_44_71_14_11_0002_0001
-2700.89	259.774	-8.433	7.007	Q1_open_3_E1_44_71_15_11_0001_0001
-2704.49	189.831	-11.331	5.871	Q1_open_3_E1_44_71_15_11_0002_0001
-2709.68	256.936	-9.077	9.219	Q1_open_3_E1_44_71_16_11_0001_0001
-2710.15	379.312	-3.771	6.011	Q1_open_3_E1_44_71_16_11_0002_0001
-2720.74	161.515	-11.051	5.294	Q1_open_3_E1_44_71_17_11_0001_0001
-2712.77	115.106	-12.523	4.432	Q1_open_3_E1_44_71_17_11_0002_0001
-2698.88	170.816	-7.973	4.513	Q1_open_3_E1_44_71_18_11_0001_0001
-2722.68	178.847	-12.344	6.275	Q1_open_3_E1_44_71_18_11_0002_0001
-2725.29	315.551	-11.17	7.826	Q1_open_3_E1_44_71_19_11_0001_0001
-2699.78	92.334	-7.483	3.658	Q1_open_3_E1_44_71_19_11_0002_0001
-2739.79	321.479	-6.618	6.164	Q1_open_3_E1_44_71_1_11_0001_0001
-2682.61	859.993	-0.763	10.729	Q1_open_3_E1_44_71_1_11_0002_0001
-2664.36	133.578	-7.493	4.048	Q1_open_3_E1_44_71_20_11_0001_0001
-2693.87	121.683	-9.685	5.05	Q1_open_3_E1_44_71_20_11_0002_0001
-2703.69	153.737	-15.224	2.59	Q1_open_3_E1_44_71_2_11_0001_0001
-2659.07	288.619	-5.55	5.682	Q1_open_3_E1_44_71_2_11_0002_0001
-2718.94	111.874	-15.477	7.555	Q1_open_3_E1_44_71_3_11_0001_0001
-2724.01	87.687	-16.381	4.973	Q1_open_3_E1_44_71_3_11_0002_0001
-2704.54	154.791	-9.665	2.527	Q1_open_3_E1_44_71_4_11_0001_0001
-2318.83	282.786	-7.001	7.187	Q1_open_3_E1_44_71_4_11_0002_0001
-2726.43	227.688	-11.81	7.302	Q1_open_3_E1_44_71_5_11_0001_0001
-2691.8	308.306	-2.858	6.687	Q1_open_3_E1_44_71_5_11_0002_0001
-2695.58	168.117	-9.049	5.694	Q1_open_3_E1_44_71_6_11_0001_0001
-2718.48	156.729	-11.949	6.45	Q1_open_3_E1_44_71_6_11_0002_0001
-2698.82	288.226	-6.084	6.343	Q1_open_3_E1_44_71_7_11_0001_0001
-2692.93	243.424	-12.735	5.613	Q1_open_3_E1_44_71_7_11_0002_0001
-2710.99	318.533	-8.743	6.67	Q1_open_3_E1_44_71_8_11_0001_0001
-2721.17	148.246	-12.207	6.756	Q1_open_3_E1_44_71_8_11_0002_0001
-2709.89	200.279	-13.869	2.794	Q1_open_3_E1_44_71_9_11_0001_0001
-2700.26	546.026	-3.911	7.636	Q1_open_3_E1_44_71_9_11_0002_0001
-3330	132.381	-9.509	3.453	Q1_open_6_E1_44_71_10_11_0001_0001
-3313.8	300.628	-6.112	7.13	Q1_open_6_E1_44_71_10_11_0002_0001
-3291.41	160.192	-9.968	4.582	Q1_open_6_E1_44_71_11_11_0001_0001
-3287.29	109.063	-10.099	3.434	Q1_open_6_E1_44_71_11_11_0002_0001
-3281.7	91.445	-18.79	6.952	Q1_open_6_E1_44_71_12_11_0001_0001
-3275.12	269.25	-1.49	6.117	Q1_open_6_E1_44_71_12_11_0002_0001
-3294.32	151.573	-15.468	4.958	Q1_open_6_E1_44_71_13_11_0001_0001
-3323.67	435.814	-5.826	7.329	Q1_open_6_E1_44_71_13_11_0002_0001
-3284.04	127.685	-8.691	3.404	Q1_open_6_E1_44_71_14_11_0001_0001
-3322.94	104.715	-6.682	4.635	Q1_open_6_E1_44_71_14_11_0002_0001
-3313.85	121.685	-10.192	3.857	Q1_open_6_E1_44_71_15_11_0001_0001
-3280.86	56.642	-7.207	5.637	Q1_open_6_E1_44_71_15_11_0002_0001
-3296.87	516.74	-5.33	11.061	Q1_open_6_E1_44_71_16_11_0001_0001
-3323.61	106.168	-8.414	4.036	Q1_open_6_E1_44_71_16_11_0002_0001
-3239.24	298.318	-12.667	6.422	Q1_open_6_E1_44_71_17_11_0001_0001
-3166.56	614.415	-3.329	6.66	Q1_open_6_E1_44_71_17_11_0002_0001
-3287.66	115.456	-6.123	5.637	Q1_open_6_E1_44_71_18_11_0001_0001
-3333.12	178.739	-8.582	4.82	Q1_open_6_E1_44_71_18_11_0002_0001
-3320.19	262.939	-8.573	4.293	Q1_open_6_E1_44_71_19_11_0001_0001
-3288.45	62.892	-13.028	2.813	Q1_open_6_E1_44_71_19_11_0002_0001
-3297.58	417.82	-9.033	13.107	Q1_open_6_E1_44_71_1_11_0001_0001
-3305.5	340.381	-14.303	8.077	Q1_open_6_E1_44_71_1_11_0002_0001
-3285.57	66.338	-6.25	3.767	Q1_open_6_E1_44_71_20_11_0001_0001
-3285.32	66.347	-9.535	5.658	Q1_open_6_E1_44_71_20_11_0002_0001
-3248.75	224.242	-6.073	6.443	Q1_open_6_E1_44_71_2_11_0001_0001
-3277.98	572.946	-9.328	7.886	Q1_open_6_E1_44_71_2_11_0002_0001
-3294.78	97.432	-11.956	5.329	Q1_open_6_E1_44_71_3_11_0001_0001
-3330.99	187.634	-8.06	3.824	Q1_open_6_E1_44_71_3_11_0002_0001
-3200.1	273.551	-9.582	9.155	Q1_open_6_E1_44_71_4_11_0001_0001
-3296.6	554.975	-7.591	11.889	Q1_open_6_E1_44_71_4_11_0002_0001
-3335.14	150.8	-9.74	2.957	Q1_open_6_E1_44_71_5_11_0001_0001
-3310.79	192.311	-10.167	5.635	Q1_open_6_E1_44_71_5_11_0002_0001
-3277.8	247.718	-8.252	8.255	Q1_open_6_E1_44_71_6_11_0001_0001
-3316.79	126.657	-6.265	4.356	Q1_open_6_E1_44_71_6_11_0002_0001
-3243.35	395.661	-9.496	7.916	Q1_open_6_E1_44_71_7_11_0001_0001
-3290.47	120.292	-11.868	6.407	Q1_open_6_E1_44_71_7_11_0002_0001
-3324.75	146.239	-5.822	4.809	Q1_open_6_E1_44_71_8_11_0001_0001
-3331.71	196.115	-10.089	4.825	Q1_open_6_E1_44_71_8_11_0002_0001
-3319.85	253.391	-10.558	6.457	Q1_open_6_E1_44_71_9_11_0001_0001
-3203.89	94.576	-13.08	4.867	Q1_open_6_E1_44_71_9_11_0002_0001
-2401.38	84.382	-13.194	3.936	Q1_open_9_E1_44_71_10_11_0001_0001
-2288.81	5488.63	0	24.414	Q1_open_9_E1_44_71_10_11_0002_0001
-2381.82	479.062	-0.33	14.067	Q1_open_9_E1_44_71_11_11_0001_0001
-2393.03	523.492	-10.621	11.775	Q1_open_9_E1_44_71_11_11_0002_0001
-2347.19	817.886	-1.99	10.421	Q1_open_9_E1_44_71_12_11_0001_0001
-2393.88	82.277	-13.908	2.17	Q1_open_9_E1_44_71_12_11_0002_0001
-2369.9	143.188	-4.965	4.85	Q1_open_9_E1_44_71_13_11_0001_0001
-2452.69	66.272	-4.005	2.717	Q1_open_9_E1_44_71_13_11_0002_0001
-2355.19	176.164	-8.938	8.235	Q1_open_9_E1_44_71_14_11_0001_0001
-2398.73	109.767	-6.528	4.314	Q1_open_9_E1_44_71_14_11_0002_0001
-2412.76	321.504	-8.65	8.541	Q1_open_9_E1_44_71_15_11_0001_0001
-2425.73	96.01	-10.115	3.35	Q1_open_9_E1_44_71_15_11_0002_0001
-2442.86	266.29	-3.829	7.283	Q1_open_9_E1_44_71_16_11_0001_0001
-2408.26	117.746	-5.171	5.04	Q1_open_9_E1_44_71_16_11_0002_0001
-2399.22	2367.11	-0.548	16.864	Q1_open_9_E1_44_71_17_11_0001_0001
-2401.8	207.354	-10.871	5.962	Q1_open_9_E1_44_71_17_11_0002_0001
-2421.88	241.404	-8.636	7.108	Q1_open_9_E1_44_71_18_11_0001_0001
-2418.96	116.271	-14.844	4.944	Q1_open_9_E1_44_71_18_11_0002_0001
-2357.53	116.168	-10.992	5.347	Q1_open_9_E1_44_71_19_11_0001_0001
-2426.9	190.008	-12.578	7.093	Q1_open_9_E1_44_71_19_11_0002_0001
-2452.44	235.914	-6.33	5.09	Q1_open_9_E1_44_71_1_11_0001_0001
-2403.89	113.275	-5.807	3.754	Q1_open_9_E1_44_71_1_11_0002_0001
-2428.82	221.099	-5.508	5.141	Q1_open_9_E1_44_71_20_11_0001_0001
-2401.8	222.629	-7.866	5.298	Q1_open_9_E1_44_71_20_11_0002_0001
-2137.29	15603.1	0	43.423	Q1_open_9_E1_44_71_2_11_0001_0001
-2413.11	148.293	-13.334	4.992	Q1_open_9_E1_44_71_2_11_0002_0001
-2482.5	217.462	-9.888	3.875	Q1_open_9_E1_44_71_3_11_0001_0001
-2429.48	81.679	-12.606	4.37	Q1_open_9_E1_44_71_3_11_0002_0001
-2435.41	85.651	-21.11	6.101	Q1_open_9_E1_44_71_4_11_0001_0001
-2390.67	106.634	-3.361	6.602	Q1_open_9_E1_44_71_4_11_0002_0001
-2390.27	146.992	-5.497	3.668	Q1_open_9_E1_44_71_5_11_0001_0001
-2345.95	146.65	-9.648	6.175	Q1_open_9_E1_44_71_5_11_0002_0001
-2406.88	145.839	-11.956	6.244	Q1_open_9_E1_44_71_6_11_0001_0001
-2420.59	86.007	-12.945	4.612	Q1_open_9_E1_44_71_6_11_0002_0001
-2402.39	142.579	-9.981	6.945	Q1_open_9_E1_44_71_7_11_0001_0001
-2426.91	112.061	-12.089	5.458	Q1_open_9_E1_44_71_7_11_0002_0001
-2287.61	124.646	-13.397	7.86	Q1_open_9_E1_44_71_8_11_0001_0001
-2408.82	252.636	-8.232	5.003	Q1_open_9_E1_44_71_8_11_0002_0001
-2398.7	53.857	-11.013	5.825	Q1_open_9_E1_44_71_9_11_0001_0001
-2421.81	86.546	-9.148	4.751	Q1_open_9_E1_44_71_9_11_0002_0001
-2388.75	286.326	-10.729	8.01	Q1_open_11_E1_44_71_10_12_0001_0001
-2378.69	172.017	-11.38	4.648	Q1_open_11_E1_44_71_10_12_0002_0001
-2273.66	351.604	-7.772	6.298	Q1_open_11_E1_44_71_11_12_0001_0001
-1287.71	602.288	-9.908	6.942	Q1_open_11_E1_44_71_11_12_0002_0001
-2390.7	203.002	-16.082	6.154	Q1_open_11_E1_44_71_12_12_0001_0001
-2388.04	62.692	-12.469	2.933	Q1_open_11_E1_44_71_12_12_0002_0001
-2380.84	90.485	-8.517	6.727	Q1_open_11_E1_44_71_13_12_0001_0001
-2409.97	125.989	-10.123	4.554	Q1_open_11_E1_44_71_13_12_0002_0001
-2421.77	80.493	-11.741	2.574	Q1_open_11_E1_44_71_14_12_0001_0001
-2385.47	95.062	-11.21	6.186	Q1_open_11_E1_44_71_14_12_0002_0001
-2391	314.945	-14.318	5.9	Q1_open_11_E1_44_71_15_12_0001_0001
-2372.09	90.239	-13.49	7.813	Q1_open_11_E1_44_71_15_12_0002_0001
-2256.07	432.896	-3.349	7.15	Q1_open_11_E1_44_71_16_12_0001_0001
-2383.39	141.641	-11.845	5.178	Q1_open_11_E1_44_71_16_12_0002_0001
-2326.41	4435.43	0	20.453	Q1_open_11_E1_44_71_17_12_0001_0001
-2394.82	122.441	-14.009	3.536	Q1_open_11_E1_44_71_17_12_0002_0001
-2406.7	119.129	-15.84	3.705	Q1_open_11_E1_44_71_18_12_0001_0001
-2387.37	309.886	-9.783	6.309	Q1_open_11_E1_44_71_18_12_0002_0001
-2469.08	176.309	-12.211	3.686	Q1_open_11_E1_44_71_19_12_0001_0001
-2402.48	79.665	-9.985	5.649	Q1_open_11_E1_44_71_19_12_0002_0001
-2389.76	78.254	-10.583	6.793	Q1_open_11_E1_44_71_1_12_0001_0001
-2399.36	225.947	-8.063	5.212	Q1_open_11_E1_44_71_1_12_0002_0001
-2376.34	297.652	-5.835	6.51	Q1_open_11_E1_44_71_20_12_0001_0001
-2393	130.858	-18.412	4.713	Q1_open_11_E1_44_71_20_12_0002_0001
-2379.05	103.895	-4.403	3.676	Q1_open_11_E1_44_71_2_12_0001_0001
-2399.58	167.575	-13.933	5.513	Q1_open_11_E1_44_71_2_12_0002_0001
-2409.72	98.999	-21.171	4.463	Q1_open_11_E1_44_71_3_12_0001_0001
-2402.93	105.244	-13.2	4.514	Q1_open_11_E1_44_71_3_12_0002_0001
-2400.02	142.859	-14.909	2.701	Q1_open_11_E1_44_71_4_12_0001_0001
-2401.88	119.564	-15.158	6.785	Q1_open_11_E1_44_71_4_12_0002_0001
-2369.96	315.495	-5.32	7.444	Q1_open_11_E1_44_71_5_12_0001_0001
-2392.22	100.165	-3.419	3.877	Q1_open_11_E1_44_71_5_12_0002_0001
-2352.54	175.432	-6.37	4.353	Q1_open_11_E1_44_71_6_12_0001_0001
-2397.21	119.973	-11.563	3.177	Q1_open_11_E1_44_71_6_12_0002_0001
-2367.09	191.387	-4.929	5.385	Q1_open_11_E1_44_71_7_12_0001_0001
-2398.66	681.598	-7.759	8.039	Q1_open_11_E1_44_71_7_12_0002_0001
-2297.93	146.707	-6.431	4.577	Q1_open_11_E1_44_71_8_12_0001_0001
-2391.46	115.531	-7.517	4.236	Q1_open_11_E1_44_71_8_12_0002_0001
-2360.47	107.528	-6.695	3.071	Q1_open_11_E1_44_71_9_12_0001_0001
-2393.35	86.433	-12.089	4.045	Q1_open_11_E1_44_71_9_12_0002_0001
-2531.56	278.518	-9.567	5.312	Q1_open_17_E1_44_71_10_12_0001_0001
-2382.12	116.756	-13.734	5.846	Q1_open_17_E1_44_71_10_12_0002_0001
-2530.68	214.747	-11.952	4.019	Q1_open_17_E1_44_71_11_12_0001_0001
-2448.13	148.113	-10.857	5.802	Q1_open_17_E1_44_71_11_12_0002_0001
-2457.09	100.305	-13.949	3.734	Q1_open_17_E1_44_71_12_12_0001_0001
-2445.33	132.701	-10.795	5.321	Q1_open_17_E1_44_71_12_12_0002_0001
-2561.81	152.01	-12.74	4.097	Q1_open_17_E1_44_71_13_12_0001_0001
-2465.24	97.623	-9.974	3.879	Q1_open_17_E1_44_71_13_12_0002_0001
-2457.62	64.509	-16.26	2.746	Q1_open_17_E1_44_71_14_12_0001_0001
-2413.76	228.637	-13.318	8.884	Q1_open_17_E1_44_71_14_12_0002_0001
-2488.48	92.468	-20.645	2.108	Q1_open_17_E1_44_71_15_12_0001_0001
-2446.16	452.251	-12.696	10.245	Q1_open_17_E1_44_71_15_12_0002_0001
-2409.65	292.694	-3.536	6.326	Q1_open_17_E1_44_71_16_12_0001_0001
-2463.89	102.386	-15.784	2.227	Q1_open_17_E1_44_71_16_12_0002_0001
-2454.98	134.661	-12.136	6.283	Q1_open_17_E1_44_71_17_12_0001_0001
-2455.77	107.847	-13.858	4.61	Q1_open_17_E1_44_71_17_12_0002_0001
-2478.87	77.798	-19.181	5.041	Q1_open_17_E1_44_71_18_12_0001_0001
-2240.68	233.142	-10.68	5.734	Q1_open_17_E1_44_71_18_12_0002_0001
-2463.76	98.192	-10.576	3.65	Q1_open_17_E1_44_71_19_12_0001_0001
-2510.22	352.822	-7.008	5.137	Q1_open_17_E1_44_71_19_12_0002_0001
-2371.36	180.009	-4.973	4.912	Q1_open_17_E1_44_71_1_12_0001_0001
-2454.8	77.767	-9.716	3.824	Q1_open_17_E1_44_71_1_12_0002_0001
-2449.9	104.337	-6.206	4.17	Q1_open_17_E1_44_71_20_12_0001_0001
-2457.75	102.223	-9.218	5.175	Q1_open_17_E1_44_71_20_12_0002_0001
-2447.48	125.903	-14.84	4.612	Q1_open_17_E1_44_71_2_12_0001_0001
-2460.16	226.592	-5.421	7.484	Q1_open_17_E1_44_71_2_12_0002_0001
-2471.53	85.732	-13.107	6.181	Q1_open_17_E1_44_71_3_12_0001_0001
-2244.99	156.793	-5.943	4.93	Q1_open_17_E1_44_71_3_12_0002_0001
-2465.39	304.999	-8.791	9.498	Q1_open_17_E1_44_71_4_12_0001_0001
-2444.07	236.824	-5.514	6.27	Q1_open_17_E1_44_71_4_12_0002_0001
-2482.51	148.575	-10.342	5.696	Q1_open_17_E1_44_71_5_12_0001_0001
-2383.78	763.985	-1.597	8.478	Q1_open_17_E1_44_71_5_12_0002_0001
-2467.24	878.648	-2.187	12.758	Q1_open_17_E1_44_71_6_12_0001_0001
-2464.13	136.938	-10.341	5.715	Q1_open_17_E1_44_71_6_12_0002_0001
-2564.36	181.167	-10.512	4.983	Q1_open_17_E1_44_71_7_12_0001_0001
-2463.33	71.843	-17.701	4.548	Q1_open_17_E1_44_71_7_12_0002_0001
-2495.92	340.205	-7.753	6.895	Q1_open_17_E1_44_71_8_12_0001_0001
-2493.46	88.109	-10.911	4.641	Q1_open_17_E1_44_71_8_12_0002_0001
-2316.8	246.89	-9.396	6.066	Q1_open_17_E1_44_71_9_12_0001_0001
-2469.28	962.203	-6.56	12.64	Q1_open_17_E1_44_71_9_12_0002_0001
-2403.95	86.075	-18.905	6.613	Q1_open_18_E1_44_71_10_12_0001_0001
-2397.4	516.286	-13.875	11.78	Q1_open_18_E1_44_71_10_12_0002_0001
-2446.95	258.817	-9.715	4.872	Q1_open_18_E1_44_71_11_12_0001_0001
-2389.35	155.536	-11.868	3.979	Q1_open_18_E1_44_71_11_12_0002_0001
-2354.73	555.212	-14.569	8.993	Q1_open_18_E1_44_71_12_12_0001_0001
-2355.99	172.151	-11.129	4.646	Q1_open_18_E1_44_71_12_12_0002_0001
-2392.29	193.865	-9.836	4.014	Q1_open_18_E1_44_71_13_12_0001_0001
-2384.14	175.894	-5.827	3.907	Q1_open_18_E1_44_71_13_12_0002_0001
-2395.79	186.444	-10.566	6.221	Q1_open_18_E1_44_71_14_12_0001_0001
-2391.5	233.948	-9.03	5.469	Q1_open_18_E1_44_71_14_12_0002_0001
-2363.48	139.291	-5.341	3.124	Q1_open_18_E1_44_71_15_12_0001_0001
-2413.76	253.231	-11.002	5.861	Q1_open_18_E1_44_71_15_12_0002_0001
-2368.58	102.224	-12.036	4.683	Q1_open_18_E1_44_71_16_12_0001_0001
-2412.57	126.845	-9.292	3.974	Q1_open_18_E1_44_71_16_12_0002_0001
-2411.79	228.518	-13.442	7.105	Q1_open_18_E1_44_71_17_12_0001_0001
-2405.46	231.631	-10.722	4.919	Q1_open_18_E1_44_71_17_12_0002_0001
-2427.57	117.884	-12.272	4.343	Q1_open_18_E1_44_71_18_12_0001_0001
-2388.02	77.962	-8.512	3.909	Q1_open_18_E1_44_71_18_12_0002_0001
-2435.56	153.746	-17.469	6.34	Q1_open_18_E1_44_71_19_12_0001_0001
-2424.52	109.697	-9.353	4.963	Q1_open_18_E1_44_71_19_12_0002_0001
-2405.45	311.74	-6.254	6.744	Q1_open_18_E1_44_71_1_12_0001_0001
-1992.6	21571.7	0	43.321	Q1_open_18_E1_44_71_1_12_0002_0001
-2460.76	158.508	-7.369	2.999	Q1_open_18_E1_44_71_20_12_0001_0001
-2372.09	225.365	-6.698	10.868	Q1_open_18_E1_44_71_20_12_0002_0001
-2410.82	268.798	-12.16	6.819	Q1_open_18_E1_44_71_2_12_0001_0001
-2401.61	97.244	-15.272	6.308	Q1_open_18_E1_44_71_2_12_0002_0001
-2420.77	179.73	-9.188	4.392	Q1_open_18_E1_44_71_3_12_0001_0001
-2407.57	140.523	-12.923	3.906	Q1_open_18_E1_44_71_3_12_0002_0001
-2332.6	363.865	-5.107	6.385	Q1_open_18_E1_44_71_4_12_0001_0001
-2383.17	196.432	-15.418	5.001	Q1_open_18_E1_44_71_4_12_0002_0001
-2388.68	187.746	-7.593	3.878	Q1_open_18_E1_44_71_5_12_0001_0001
-2419.54	139.593	-13.277	4.171	Q1_open_18_E1_44_71_5_12_0002_0001
-2417.65	298.346	-6.697	5.943	Q1_open_18_E1_44_71_6_12_0001_0001
-2376.72	231.886	-4.744	5.586	Q1_open_18_E1_44_71_6_12_0002_0001
-2380.68	59.275	-14.223	3.666	Q1_open_18_E1_44_71_7_12_0001_0001
-2433.73	122.768	-20.93	4.541	Q1_open_18_E1_44_71_7_12_0002_0001
-2399.22	350.393	-12.029	9.22	Q1_open_18_E1_44_71_8_12_0001_0001
-2397.4	204.207	-9.946	6.53	Q1_open_18_E1_44_71_8_12_0002_0001
-2414.89	263.315	-9.305	6.976	Q1_open_18_E1_44_71_9_12_0001_0001
-2433.7	143.655	-16.015	3.882	Q1_open_18_E1_44_71_9_12_0002_0001
-2265.72	565.746	-15.912	8.526	Q1_open_20_E1_44_71_10_12_0001_0001
-2246.74	310.406	-3.817	6.724	Q1_open_20_E1_44_71_10_12_0002_0001
-2057.18	186.153	-7.359	4.64	Q1_open_20_E1_44_71_11_12_0001_0001
-2191.19	961.186	-2.684	13.326	Q1_open_20_E1_44_71_11_12_0002_0001
-2242.4	124.105	-6.527	2.975	Q1_open_20_E1_44_71_12_12_0001_0001
-2241.66	175.349	-12.057	5.302	Q1_open_20_E1_44_71_12_12_0002_0001
-2203.35	173.99	-8.802	4.335	Q1_open_20_E1_44_71_13_12_0001_0001
-2273.07	115.105	-15.87	4.753	Q1_open_20_E1_44_71_13_12_0002_0001
-2245.67	126.765	-9.485	3.373	Q1_open_20_E1_44_71_14_12_0001_0001
-2250.92	173.841	-12.352	5.613	Q1_open_20_E1_44_71_14_12_0002_0001
-2251.19	114.494	-10.098	3.78	Q1_open_20_E1_44_71_15_12_0001_0001
-2251.05	716.141	-11.685	11.933	Q1_open_20_E1_44_71_15_12_0002_0001
-2153.32	490.596	-0.403	7.746	Q1_open_20_E1_44_71_16_12_0001_0001
-2252.11	70.085	-10.774	3.707	Q1_open_20_E1_44_71_16_12_0002_0001
-2234.82	192.665	-5.774	4.309	Q1_open_20_E1_44_71_17_12_0001_0001
-2246.78	98.838	-11.545	4.116	Q1_open_20_E1_44_71_17_12_0002_0001
-2259.56	350.08	-13.866	8.235	Q1_open_20_E1_44_71_18_12_0001_0001
-2257.17	176.811	-12.301	6.147	Q1_open_20_E1_44_71_18_12_0002_0001
-2251.05	614.671	-8.254	14.713	Q1_open_20_E1_44_71_19_12_0001_0001
-1846.74	498.075	-7.176	5.545	Q1_open_20_E1_44_71_19_12_0002_0001
-2307.92	385.129	-7.215	6.433	Q1_open_20_E1_44_71_1_12_0001_0001
-2252.01	61.827	-9.253	5.238	Q1_open_20_E1_44_71_1_12_0002_0001
-2247.53	216.287	-7.199	3.272	Q1_open_20_E1_44_71_20_12_0001_0001
-2255.35	160.532	-5.562	4.39	Q1_open_20_E1_44_71_20_12_0002_0001
-2253.95	240.308	-15.389	5.931	Q1_open_20_E1_44_71_2_12_0001_0001
-2240.17	330.133	-6.987	8.733	Q1_open_20_E1_44_71_2_12_0002_0001
-2241.53	199.942	-5.081	3.562	Q1_open_20_E1_44_71_3_12_0001_0001
-2250.32	146.01	-5.314	3.752	Q1_open_20_E1_44_71_3_12_0002_0001
-2263.2	145.693	-12.435	4.629	Q1_open_20_E1_44_71_4_12_0001_0001
-2255.78	161.415	-11.385	3.357	Q1_open_20_E1_44_71_4_12_0002_0001
-2281.21	56.474	-19.971	3.762	Q1_open_20_E1_44_71_5_12_0001_0001
-2252.04	683.123	-6.075	9.605	Q1_open_20_E1_44_71_5_12_0002_0001
-2191.43	314.126	0.019	7.747	Q1_open_20_E1_44_71_6_12_0001_0001
-2253.83	122.907	-10.751	5.295	Q1_open_20_E1_44_71_6_12_0002_0001
-2235.87	214.927	-18.141	13.043	Q1_open_20_E1_44_71_7_12_0001_0001
-2254.97	232.456	-8.704	6.208	Q1_open_20_E1_44_71_7_12_0002_0001
-2096.67	246.555	-18.724	4.58	Q1_open_20_E1_44_71_8_12_0001_0001
-2254.47	71.464	-12.906	4.467	Q1_open_20_E1_44_71_8_12_0002_0001
-2240.26	103.01	-7.63	3.733	Q1_open_20_E1_44_71_9_12_0001_0001
-2256.73	171.432	-12.699	2.913	Q1_open_20_E1_44_71_9_12_0002_0001
-2309.42	122.695	-10.148	2.374	Q1_open_22_E1_44_71_10_12_0001_0001
-2334.16	150.912	-16.736	4.802	Q1_open_22_E1_44_71_10_12_0002_0001
-2275.97	163.603	-6.183	4.282	Q1_open_22_E1_44_71_11_12_0001_0001
-2057.31	2021.6	-5.521	14.444	Q1_open_22_E1_44_71_11_12_0002_0001
-2294.59	395.017	-2.824	7.372	Q1_open_22_E1_44_71_12_12_0001_0001
-2381.71	140.34	-15.396	3.405	Q1_open_22_E1_44_71_12_12_0002_0001
-2247.53	207.25	-3.467	6.496	Q1_open_22_E1_44_71_13_12_0001_0001
-2322.01	165.872	-9.199	5.944	Q1_open_22_E1_44_71_13_12_0002_0001
-2154.59	263.81	-10.356	6.411	Q1_open_22_E1_44_71_14_12_0001_0001
-2063.86	141.91	-8.903	7.185	Q1_open_22_E1_44_71_14_12_0002_0001
-2383.27	90.312	-10.671	4.557	Q1_open_22_E1_44_71_15_12_0001_0001
-2278.86	139.958	-7.852	8.296	Q1_open_22_E1_44_71_15_12_0002_0001
-2445.95	223.013	-12.172	4.43	Q1_open_22_E1_44_71_16_12_0001_0001
-2309.25	80.319	-4.978	2.996	Q1_open_22_E1_44_71_16_12_0002_0001
-1921.08	2320.7	0	17.252	Q1_open_22_E1_44_71_17_12_0001_0001
-2291.57	64.672	-9.586	4.571	Q1_open_22_E1_44_71_17_12_0002_0001
-2336.81	134.438	-15.515	4.464	Q1_open_22_E1_44_71_18_12_0001_0001
-2245.32	257.612	-17.741	7.588	Q1_open_22_E1_44_71_18_12_0002_0001
-2259.37	195.019	-7.386	6.086	Q1_open_22_E1_44_71_19_12_0001_0001
-2313.99	63.685	-8.15	3.291	Q1_open_22_E1_44_71_19_12_0002_0001
-2286.21	105.768	-12.294	6.322	Q1_open_22_E1_44_71_1_12_0001_0001
-2309.38	133.578	-13.753	6.34	Q1_open_22_E1_44_71_1_12_0002_0001
-2295.83	146.671	-6.118	4.73	Q1_open_22_E1_44_71_20_12_0001_0001
-2177.87	175.952	-4.435	5.1	Q1_open_22_E1_44_71_20_12_0002_0001
-2421.68	154.457	-5.146	4.944	Q1_open_22_E1_44_71_2_12_0001_0001
-2297.22	170.515	-13.221	5.292	Q1_open_22_E1_44_71_2_12_0002_0001
-2316.02	135.209	-7.919	5.83	Q1_open_22_E1_44_71_3_12_0001_0001
-2361.18	234.23	-5.457	5.323	Q1_open_22_E1_44_71_3_12_0002_0001
-2330.14	56.023	-11.192	5.642	Q1_open_22_E1_44_71_4_12_0001_0001
-2312.15	66.791	-9.839	3.788	Q1_open_22_E1_44_71_4_12_0002_0001
-2320.42	132.696	-12.648	3.114	Q1_open_22_E1_44_71_5_12_0001_0001
-1730.71	314.812	-1.674	6.594	Q1_open_22_E1_44_71_5_12_0002_0001
-2029.36	303.482	-0.895	6.657	Q1_open_22_E1_44_71_6_12_0001_0001
-2293.76	176.46	-9.524	6.723	Q1_open_22_E1_44_71_6_12_0002_0001
-2302.53	141.727	-13.358	6.986	Q1_open_22_E1_44_71_7_12_0001_0001
-2383	195.694	-9.199	4.718	Q1_open_22_E1_44_71_7_12_0002_0001
-2385.88	177.802	-7.606	4.978	Q1_open_22_E1_44_71_8_12_0001_0001
-2314.37	137.631	-10.213	4.709	Q1_open_22_E1_44_71_8_12_0002_0001
-2141.53	163.132	-6.711	5.066	Q1_open_22_E1_44_71_9_12_0001_0001
-2318.29	61.433	-9.412	5.255	Q1_open_22_E1_44_71_9_12_0002_0001
-2710.43	81.384	-15.054	4.095	Q1_open_3_E1_44_71_10_12_0001_0001
-2685.4	186.943	-8.745	4.964	Q1_open_3_E1_44_71_10_12_0002_0001
-2672.48	90.85	-5.117	3.382	Q1_open_3_E1_44_71_11_12_0001_0001
-2702	200.426	-7.643	3.569	Q1_open_3_E1_44_71_11_12_0002_0001
-2578.58	241.097	-13.64	5.28	Q1_open_3_E1_44_71_12_12_0001_0001
-2673.58	421.959	-9.666	10.255	Q1_open_3_E1_44_71_12_12_0002_0001
-2679.72	130.541	-9.692	3.977	Q1_open_3_E1_44_71_13_12_0001_0001
-2716.74	121.25	-9.326	5.124	Q1_open_3_E1_44_71_13_12_0002_0001
-2688.75	215.47	-5.963	9.513	Q1_open_3_E1_44_71_14_12_0001_0001
-2699.25	378.368	-9.344	11.567	Q1_open_3_E1_44_71_14_12_0002_0001
-2704.25	203.98	-14.143	6.033	Q1_open_3_E1_44_71_15_12_0001_0001
-2602.9	326.621	-1.689	6.434	Q1_open_3_E1_44_71_15_12_0002_0001
-2699.56	113.758	-16.908	5.609	Q1_open_3_E1_44_71_16_12_0001_0001
-2699.8	526.398	-12.719	13.187	Q1_open_3_E1_44_71_16_12_0002_0001
-2689.13	223.373	-9.09	7.194	Q1_open_3_E1_44_71_17_12_0001_0001
-2699.17	280.333	-15.35	7.159	Q1_open_3_E1_44_71_17_12_0002_0001
-2705.45	1201.52	-4.439	12.229	Q1_open_3_E1_44_71_18_12_0001_0001
-2732.2	184.09	-11.503	3.189	Q1_open_3_E1_44_71_18_12_0002_0001
-2680.25	187.852	-5.743	5.379	Q1_open_3_E1_44_71_19_12_0001_0001
-2704.18	118.586	-13.103	3.593	Q1_open_3_E1_44_71_19_12_0002_0001
-2640.03	405.432	-5.154	5.843	Q1_open_3_E1_44_71_1_12_0001_0001
-2711.2	153.235	-16.066	5.065	Q1_open_3_E1_44_71_1_12_0002_0001
-2690.74	125.794	-19.047	2.188	Q1_open_3_E1_44_71_20_12_0001_0001
-2716.96	124.267	-11.429	4.949	Q1_open_3_E1_44_71_20_12_0002_0001
-2705.18	131.621	-6.011	5.862	Q1_open_3_E1_44_71_2_12_0001_0001
-2700.22	82.884	-8.506	4.365	Q1_open_3_E1_44_71_2_12_0002_0001
-2686.82	83.827	-8.31	3.202	Q1_open_3_E1_44_71_3_12_0001_0001
-2703.18	174.164	-8.347	3.947	Q1_open_3_E1_44_71_3_12_0002_0001
-2730	116.334	-14.059	1.849	Q1_open_3_E1_44_71_4_12_0001_0001
-2697.54	197.006	-11.499	7.433	Q1_open_3_E1_44_71_4_12_0002_0001
-2714.58	222.498	-14.166	2.87	Q1_open_3_E1_44_71_5_12_0001_0001
-2693.92	368.495	-3.328	5.848	Q1_open_3_E1_44_71_5_12_0002_0001
-2666.41	197.262	-5.71	4.617	Q1_open_3_E1_44_71_6_12_0001_0001
-2656.2	160.227	-5.552	4.949	Q1_open_3_E1_44_71_6_12_0002_0001
-2701.85	199.397	-2.441	4.462	Q1_open_3_E1_44_71_7_12_0001_0001
-2708.86	244.056	-11.354	5.299	Q1_open_3_E1_44_71_7_12_0002_0001
-2715.41	105.155	-10.854	4.112	Q1_open_3_E1_44_71_8_12_0001_0001
-2709.38	423.484	-5.495	6.786	Q1_open_3_E1_44_71_8_12_0002_0001
-2727.9	201.88	-9.162	5.57	Q1_open_3_E1_44_71_9_12_0001_0001
-2723.66	132.781	-15.105	6.971	Q1_open_3_E1_44_71_9_12_0002_0001
-3248.07	283.196	-7.595	11.306	Q1_open_6_E1_44_71_10_12_0001_0001
-3289.93	293.087	-10.28	7.188	Q1_open_6_E1_44_71_10_12_0002_0001
-3277.23	311.214	-7.238	4.668	Q1_open_6_E1_44_71_11_12_0001_0001
-3274.81	215.383	-4.43	5.861	Q1_open_6_E1_44_71_11_12_0002_0001
-3277.97	82.493	-10.091	5.319	Q1_open_6_E1_44_71_12_12_0001_0001
-3255.39	69.605	-10.359	3.551	Q1_open_6_E1_44_71_12_12_0002_0001
-3294.71	207.338	-1.77	4.379	Q1_open_6_E1_44_71_13_12_0001_0001
-3071.26	98.94	-6.643	4.656	Q1_open_6_E1_44_71_13_12_0002_0001
-3288.44	67.368	-13.927	2.793	Q1_open_6_E1_44_71_14_12_0001_0001
-3196.49	147.917	-4.368	6.052	Q1_open_6_E1_44_71_14_12_0002_0001
-3289.69	250.02	-14.831	9.839	Q1_open_6_E1_44_71_15_12_0001_0001
-3322.97	148.449	-8.428	3.547	Q1_open_6_E1_44_71_15_12_0002_0001
-3293.96	154.563	-13.264	6.598	Q1_open_6_E1_44_71_16_12_0001_0001
-3289.61	598.05	-5.46	10.885	Q1_open_6_E1_44_71_16_12_0002_0001
-3285.25	352.523	-3.705	7.699	Q1_open_6_E1_44_71_17_12_0001_0001
-3245.43	501.417	-6.553	10.13	Q1_open_6_E1_44_71_17_12_0002_0001
-3321.46	145.939	-14.475	4.729	Q1_open_6_E1_44_71_18_12_0001_0001
-3294.2	102.793	-8.961	4.166	Q1_open_6_E1_44_71_18_12_0002_0001
-3276.72	109.686	-13.081	5.197	Q1_open_6_E1_44_71_19_12_0001_0001
-3284.57	101.423	-7.679	5.27	Q1_open_6_E1_44_71_19_12_0002_0001
-3326.3	269.074	-9.058	6.929	Q1_open_6_E1_44_71_1_12_0001_0001
-3334.25	171.976	-12.152	4.037	Q1_open_6_E1_44_71_1_12_0002_0001
-3285.84	203.201	-14.317	6.885	Q1_open_6_E1_44_71_20_12_0001_0001
-3317.59	219.249	-13.437	6.35	Q1_open_6_E1_44_71_20_12_0002_0001
-3289.71	236.635	-11.482	6.754	Q1_open_6_E1_44_71_2_12_0001_0001
-3331.08	473.182	-8.12	7.353	Q1_open_6_E1_44_71_2_12_0002_0001
-3261.52	92.804	-7.739	7.221	Q1_open_6_E1_44_71_3_12_0001_0001
-3297.42	86.938	-11.415	5.483	Q1_open_6_E1_44_71_3_12_0002_0001
-3298.82	535.78	-3.043	9.042	Q1_open_6_E1_44_71_4_12_0001_0001
-3298.45	213.302	-13.705	7.645	Q1_open_6_E1_44_71_4_12_0002_0001
-3283.27	127.058	-8.279	4.61	Q1_open_6_E1_44_71_5_12_0001_0001
-3334.5	206.518	-13.911	4.539	Q1_open_6_E1_44_71_5_12_0002_0001
-3074.85	179.678	-2.313	5.772	Q1_open_6_E1_44_71_6_12_0001_0001
-3304.86	990.291	-5.285	12.568	Q1_open_6_E1_44_71_6_12_0002_0001
-3292.95	227.544	-3.306	4.923	Q1_open_6_E1_44_71_7_12_0001_0001
-3296.46	141.072	-12.579	5.531	Q1_open_6_E1_44_71_7_12_0002_0001
-3283.87	159.701	-11.031	6.345	Q1_open_6_E1_44_71_8_12_0001_0001
-3293.9	169.917	-10.933	6.216	Q1_open_6_E1_44_71_8_12_0002_0001
-3294.53	121.823	-11.601	3.919	Q1_open_6_E1_44_71_9_12_0001_0001
-3292.72	599.02	-3.568	8.048	Q1_open_6_E1_44_71_9_12_0002_0001
-2405.62	152.141	-8.604	5.441	Q1_open_9_E1_44_71_10_12_0001_0001
-2471.7	177.036	-11.184	4.439	Q1_open_9_E1_44_71_10_12_0002_0001
-2397.76	130.793	-8.832	2.957	Q1_open_9_E1_44_71_11_12_0001_0001
-1760.27	197.353	-9.565	7.121	Q1_open_9_E1_44_71_11_12_0002_0001
-2391.6	507.84	-4.807	7.489	Q1_open_9_E1_44_71_12_12_0001_0001
-2374.36	205.565	-14.61	5.554	Q1_open_9_E1_44_71_12_12_0002_0001
-2410.64	81.874	-11.333	4.791	Q1_open_9_E1_44_71_13_12_0001_0001
-2402	89.688	-9.254	2.887	Q1_open_9_E1_44_71_13_12_0002_0001
-2426.27	381.638	-14.666	7.952	Q1_open_9_E1_44_71_14_12_0001_0001
-2425.31	147.039	-15.845	6.368	Q1_open_9_E1_44_71_14_12_0002_0001
-2415.5	111.758	-11.094	6.41	Q1_open_9_E1_44_71_15_12_0001_0001
-2382.69	406.674	-4.532	18.446	Q1_open_9_E1_44_71_15_12_0002_0001
-2462.93	128.793	-16.508	1.891	Q1_open_9_E1_44_71_16_12_0001_0001
-2404.69	88.178	-10.231	3.853	Q1_open_9_E1_44_71_16_12_0002_0001
-2393.72	246.422	-10.279	5.944	Q1_open_9_E1_44_71_17_12_0001_0001
-2410.85	89.925	-13.943	5.408	Q1_open_9_E1_44_71_17_12_0002_0001
-2215.3	258.753	-7.801	5.883	Q1_open_9_E1_44_71_18_12_0001_0001
-2398.72	138.511	-5.344	4.617	Q1_open_9_E1_44_71_18_12_0002_0001
-2386.84	66.342	-6.119	2.43	Q1_open_9_E1_44_71_19_12_0001_0001
-2286.06	154.646	-8.704	5.54	Q1_open_9_E1_44_71_19_12_0002_0001
-2408.85	807.402	-2.649	9.918	Q1_open_9_E1_44_71_1_12_0001_0001
-2399.61	82.506	-3.557	3.965	Q1_open_9_E1_44_71_1_12_0002_0001
-2421.39	79.892	-15.78	4.698	Q1_open_9_E1_44_71_20_12_0001_0001
-2390.4	67.378	-11.069	2.377	Q1_open_9_E1_44_71_20_12_0002_0001
-2393.36	96.401	-16.466	1.707	Q1_open_9_E1_44_71_2_12_0001_0001
-2373.44	151.281	-4.758	5.644	Q1_open_9_E1_44_71_2_12_0002_0001
-2212.19	338.608	-5.601	7.209	Q1_open_9_E1_44_71_3_12_0001_0001
-2391.45	404.36	-5.996	9.232	Q1_open_9_E1_44_71_3_12_0002_0001
-2153.24	189.198	-6.938	5.326	Q1_open_9_E1_44_71_4_12_0001_0001
-2426.44	81.867	-11.473	4.979	Q1_open_9_E1_44_71_4_12_0002_0001
-2409.99	69.503	-9.445	6.41	Q1_open_9_E1_44_71_5_12_0001_0001
-2407.95	198.896	-5.699	5.485	Q1_open_9_E1_44_71_5_12_0002_0001
-1874.54	444.531	-9.174	8.876	Q1_open_9_E1_44_71_6_12_0001_0001
-2422.28	165.13	-13.736	6.646	Q1_open_9_E1_44_71_6_12_0002_0001
-2393.39	376.267	-10.309	9.831	Q1_open_9_E1_44_71_7_12_0001_0001
-2404.42	95.392	-9.793	5.095	Q1_open_9_E1_44_71_7_12_0002_0001
-2406.96	145.056	-5.228	3.042	Q1_open_9_E1_44_71_8_12_0001_0001
-2402.28	311.948	-7.528	11.675	Q1_open_9_E1_44_71_8_12_0002_0001
-2401.7	263.976	-5.884	6.705	Q1_open_9_E1_44_71_9_12_0001_0001
-2357.97	164.996	-3.494	4.346	Q1_open_9_E1_44_71_9_12_0002_0001
-2433.14	269.321	-10.789	4.5	Q1_open_11_E1_44_71_10_13_0001_0001
-2398.42	73.333	-17.134	2.859	Q1_open_11_E1_44_71_10_13_0002_0001
-2377.09	213.982	-6.212	4.837	Q1_open_11_E1_44_71_11_13_0001_0001
-2168.8	826.595	-6.285	9.076	Q1_open_11_E1_44_71_11_13_0002_0001
-2392.99	131.549	-14.197	7.318	Q1_open_11_E1_44_71_12_13_0001_0001
-2383.43	178.337	-12.452	5.101	Q1_open_11_E1_44_71_12_13_0002_0001
-2371.44	156.516	-6.089	4.266	Q1_open_11_E1_44_71_13_13_0001_0001
-2391.15	207.641	-3.943	4.768	Q1_open_11_E1_44_71_13_13_0002_0001
-2366.39	237.88	-8.75	5.042	Q1_open_11_E1_44_71_14_13_0001_0001
-2387.12	171.602	-11.571	2.481	Q1_open_11_E1_44_71_14_13_0002_0001
-2378.94	260.627	-6.772	6.721	Q1_open_11_E1_44_71_15_13_0001_0001
-2391.35	178.48	-6.171	5.25	Q1_open_11_E1_44_71_15_13_0002_0001
-2346.32	230.899	-5.549	6.338	Q1_open_11_E1_44_71_16_13_0001_0001
-2376.28	88.783	-13.701	4.627	Q1_open_11_E1_44_71_16_13_0002_0001
-2384.04	349.314	-5.096	6.605	Q1_open_11_E1_44_71_17_13_0001_0001
-2336.66	434.806	-9.468	5.363	Q1_open_11_E1_44_71_17_13_0002_0001
-2498.13	206.995	-13.045	4.636	Q1_open_11_E1_44_71_18_13_0001_0001
-2384.02	201.182	-12.555	4.767	Q1_open_11_E1_44_71_18_13_0002_0001
-2387.73	137.993	-13.547	4.56	Q1_open_11_E1_44_71_19_13_0001_0001
-2403.16	163.396	-9.81	4.779	Q1_open_11_E1_44_71_19_13_0002_0001
-2400.3	269.453	-4.565	5.66	Q1_open_11_E1_44_71_1_13_0001_0001
-2397.62	113.778	-12.167	2.636	Q1_open_11_E1_44_71_1_13_0002_0001
-2393.65	153.899	-12	5.008	Q1_open_11_E1_44_71_20_13_0001_0001
-2401.67	141.384	-7.03	4.619	Q1_open_11_E1_44_71_20_13_0002_0001
-2378.32	253.527	-11.474	6.876	Q1_open_11_E1_44_71_2_13_0001_0001
-2394.29	108.874	-24.478	2.711	Q1_open_11_E1_44_71_2_13_0002_0001
-2373.76	210.774	-4.879	6.535	Q1_open_11_E1_44_71_3_13_0001_0001
-2401.92	154.242	-13.158	2.704	Q1_open_11_E1_44_71_3_13_0002_0001
-2403.17	138.73	-16.462	2.945	Q1_open_11_E1_44_71_4_13_0001_0001
-2399.87	89.441	-6.622	3.501	Q1_open_11_E1_44_71_4_13_0002_0001
-2172.73	1185.18	-1.239	14.666	Q1_open_11_E1_44_71_5_13_0001_0001
-2385.4	426.768	-4.971	6.76	Q1_open_11_E1_44_71_5_13_0002_0001
-2385.03	214.716	-7.883	6.343	Q1_open_11_E1_44_71_6_13_0001_0001
-2389.46	125.957	-10.512	5.235	Q1_open_11_E1_44_71_6_13_0002_0001
-2206.99	400.175	-4.454	6.791	Q1_open_11_E1_44_71_7_13_0001_0001
-2344.07	210.754	-6.163	5.078	Q1_open_11_E1_44_71_7_13_0002_0001
-2361.18	169.498	-12.651	3.034	Q1_open_11_E1_44_71_8_13_0001_0001
-2398.01	170.425	-9.881	2.783	Q1_open_11_E1_44_71_8_13_0002_0001
-2406.89	218.391	-9.818	4.776	Q1_open_11_E1_44_71_9_13_0001_0001
-2369.67	174.626	-6.312	4.523	Q1_open_11_E1_44_71_9_13_0002_0001
-2565.48	119.403	-14.5	2.511	Q1_open_17_E1_44_71_10_13_0001_0001
-2457.96	109.533	-8.107	2.911	Q1_open_17_E1_44_71_10_13_0002_0001
-2543.49	199.84	-10.013	3.605	Q1_open_17_E1_44_71_11_13_0001_0001
-2470.38	127.618	-8.084	4.685	Q1_open_17_E1_44_71_11_13_0002_0001
-2477.43	147.461	-22.473	4.824	Q1_open_17_E1_44_71_12_13_0001_0001
-2455.56	429.708	-5.989	8.162	Q1_open_17_E1_44_71_12_13_0002_0001
-2377.75	317.96	-1.596	6.539	Q1_open_17_E1_44_71_13_13_0001_0001
-2456.36	69.845	-9.127	5.601	Q1_open_17_E1_44_71_13_13_0002_0001
-2450.24	219.276	-13.329	6.797	Q1_open_17_E1_44_71_14_13_0001_0001
-2432.79	290.575	-10.303	7.992	Q1_open_17_E1_44_71_14_13_0002_0001
-2452.71	228.658	-10.663	6.555	Q1_open_17_E1_44_71_15_13_0001_0001
-2435.39	113.756	-6.745	7.264	Q1_open_17_E1_44_71_15_13_0002_0001
-2445.63	82.267	-5.877	4.397	Q1_open_17_E1_44_71_16_13_0001_0001
-2442.75	169.045	-3.643	7.479	Q1_open_17_E1_44_71_16_13_0002_0001
-2057.84	926.727	-2.769	11.572	Q1_open_17_E1_44_71_17_13_0001_0001
-2468.24	93.167	-14.085	5.447	Q1_open_17_E1_44_71_17_13_0002_0001
-2459.94	113.731	-13.557	2.179	Q1_open_17_E1_44_71_18_13_0001_0001
-2477.57	391.437	-16.663	8.9	Q1_open_17_E1_44_71_18_13_0002_0001
-2461.63	90.485	-9.139	3.926	Q1_open_17_E1_44_71_19_13_0001_0001
-2432.53	174.831	-5.23	4.94	Q1_open_17_E1_44_71_19_13_0002_0001
-2549.07	183.462	-8.666	3.381	Q1_open_17_E1_44_71_1_13_0001_0001
-2471.98	35.737	-8.747	5.03	Q1_open_17_E1_44_71_1_13_0002_0001
-2475.89	319.875	-9.91	7.975	Q1_open_17_E1_44_71_20_13_0001_0001
-2473.59	141.98	-16.003	6.602	Q1_open_17_E1_44_71_20_13_0002_0001
-2455.38	190.991	-8.265	5.87	Q1_open_17_E1_44_71_2_13_0001_0001
-2484.89	40.234	-19.515	2.86	Q1_open_17_E1_44_71_2_13_0002_0001
-2425.07	131.181	-6.794	8.474	Q1_open_17_E1_44_71_3_13_0001_0001
-2466.09	102.102	-10.444	3.17	Q1_open_17_E1_44_71_3_13_0002_0001
-2490.51	98.765	-14.383	2.008	Q1_open_17_E1_44_71_4_13_0001_0001
-2463.35	70.683	-17.404	6.697	Q1_open_17_E1_44_71_4_13_0002_0001
-2468.23	397.686	-11.599	9.999	Q1_open_17_E1_44_71_5_13_0001_0001
-2562.3	161.805	-6.962	4.116	Q1_open_17_E1_44_71_5_13_0002_0001
-2464.11	224.866	-7.54	7.365	Q1_open_17_E1_44_71_6_13_0001_0001
-2479.84	101.504	-9.415	3.681	Q1_open_17_E1_44_71_6_13_0002_0001
-2537.22	149.724	-6.452	5.166	Q1_open_17_E1_44_71_7_13_0001_0001
-2464.45	209.64	-9.81	6.218	Q1_open_17_E1_44_71_7_13_0002_0001
-2460.61	726.209	-5.562	11.475	Q1_open_17_E1_44_71_8_13_0001_0001
-2464.55	353.934	-8.826	9.072	Q1_open_17_E1_44_71_8_13_0002_0001
-2445.6	76.647	-11.713	5.533	Q1_open_17_E1_44_71_9_13_0001_0001
-2462.02	83.078	-9.639	2.785	Q1_open_17_E1_44_71_9_13_0002_0001
-2423.16	272.106	-10.939	6.872	Q1_open_18_E1_44_71_10_13_0001_0001
-2419.59	182.97	-10.606	5.004	Q1_open_18_E1_44_71_10_13_0002_0001
-2427.05	181.75	-14.924	5.152	Q1_open_18_E1_44_71_11_13_0001_0001
-2409.36	121.314	-5.223	3.484	Q1_open_18_E1_44_71_11_13_0002_0001
-2412.77	142.61	-14.375	4.02	Q1_open_18_E1_44_71_12_13_0001_0001
-2334.04	88.489	-9.741	5.277	Q1_open_18_E1_44_71_12_13_0002_0001
-2468.62	228.365	-11.959	4.01	Q1_open_18_E1_44_71_13_13_0001_0001
-2410.84	261.089	-3.608	5.757	Q1_open_18_E1_44_71_13_13_0002_0001
-2400.44	320.365	-8.128	8.309	Q1_open_18_E1_44_71_14_13_0001_0001
-2414.68	79.198	-8.098	3.825	Q1_open_18_E1_44_71_14_13_0002_0001
-2406.93	109.791	-8.128	4.011	Q1_open_18_E1_44_71_15_13_0001_0001
-2360.54	221.188	-3.963	7.346	Q1_open_18_E1_44_71_15_13_0002_0001
-2395.47	666.913	-2.692	11.183	Q1_open_18_E1_44_71_16_13_0001_0001
-2393.79	123.928	-18.34	4.68	Q1_open_18_E1_44_71_16_13_0002_0001
-2457.4	434.266	-11.73	6.776	Q1_open_18_E1_44_71_17_13_0001_0001
-2413.93	136.64	-9.004	5.85	Q1_open_18_E1_44_71_17_13_0002_0001
-2418.21	162.084	-12.497	3.677	Q1_open_18_E1_44_71_18_13_0001_0001
-2428.51	89.793	-11.323	1.551	Q1_open_18_E1_44_71_18_13_0002_0001
-2008.12	790.788	-2.387	9.448	Q1_open_18_E1_44_71_19_13_0001_0001
-2422.18	355.305	-5.943	9.825	Q1_open_18_E1_44_71_19_13_0002_0001
-2275.71	45.992	-9.791	5.208	Q1_open_18_E1_44_71_1_13_0001_0001
-2402.67	124.351	-12.042	5.217	Q1_open_18_E1_44_71_1_13_0002_0001
-2335.59	52.955	-8.57	5.161	Q1_open_18_E1_44_71_20_13_0001_0001
-2369.16	111.693	-15.889	7.674	Q1_open_18_E1_44_71_20_13_0002_0001
-2416.1	156.636	-14.851	4.542	Q1_open_18_E1_44_71_2_13_0001_0001
-2377.4	83.42	-11.414	4.368	Q1_open_18_E1_44_71_2_13_0002_0001
-2265.26	215.711	-7.009	5.842	Q1_open_18_E1_44_71_3_13_0001_0001
-2386.55	142.377	-5.763	5.783	Q1_open_18_E1_44_71_3_13_0002_0001
-2401.47	121.809	-14.709	4.379	Q1_open_18_E1_44_71_4_13_0001_0001
-2407.62	152.059	-14.728	4.309	Q1_open_18_E1_44_71_4_13_0002_0001
-2371.61	166.98	-10.254	3.162	Q1_open_18_E1_44_71_5_13_0001_0001
-2384.37	149.412	-7.8	3.448	Q1_open_18_E1_44_71_5_13_0002_0001
-2365.69	219.798	-1.688	4.495	Q1_open_18_E1_44_71_6_13_0001_0001
-2426.13	171.488	-14.111	5.813	Q1_open_18_E1_44_71_6_13_0002_0001
-2415	232.774	-12.373	6.669	Q1_open_18_E1_44_71_7_13_0001_0001
-2329.01	351.034	-1.92	7.141	Q1_open_18_E1_44_71_7_13_0002_0001
-2397.23	129.777	-6.998	3.35	Q1_open_18_E1_44_71_8_13_0001_0001
-2389.9	407.438	-6.224	7.084	Q1_open_18_E1_44_71_8_13_0002_0001
-2383.53	651.609	-3.038	10.087	Q1_open_18_E1_44_71_9_13_0001_0001
-2407.7	173.015	-6.968	5.215	Q1_open_18_E1_44_71_9_13_0002_0001
-2254.56	98.968	-10.744	4.386	Q1_open_20_E1_44_71_10_13_0001_0001
-2261.91	127.627	-13.954	4.177	Q1_open_20_E1_44_71_10_13_0002_0001
-2238.32	308.479	-8.338	6.553	Q1_open_20_E1_44_71_11_13_0001_0001
-2286.28	205.335	-6.113	4.172	Q1_open_20_E1_44_71_11_13_0002_0001
-2235.94	201.686	-17.108	5.782	Q1_open_20_E1_44_71_12_13_0001_0001
-2243.34	110.08	-15.461	6.526	Q1_open_20_E1_44_71_12_13_0002_0001
-2231.43	169.825	-6.205	4.794	Q1_open_20_E1_44_71_13_13_0001_0001
-2268.6	114.655	-12.425	4.728	Q1_open_20_E1_44_71_13_13_0002_0001
-2282.5	115.31	-20.033	2.163	Q1_open_20_E1_44_71_14_13_0001_0001
-2261.6	309.737	-9.482	6.642	Q1_open_20_E1_44_71_14_13_0002_0001
-2249.58	174.82	-11.274	5.159	Q1_open_20_E1_44_71_15_13_0001_0001
-2243.15	136.317	-11.752	4.426	Q1_open_20_E1_44_71_15_13_0002_0001
-2253.87	325.029	-8.691	7.936	Q1_open_20_E1_44_71_16_13_0001_0001
-2262.85	131.962	-4.377	4.203	Q1_open_20_E1_44_71_16_13_0002_0001
-2223.09	365.577	-13.336	7.739	Q1_open_20_E1_44_71_17_13_0001_0001
-2263.3	163.328	-20.413	7.341	Q1_open_20_E1_44_71_17_13_0002_0001
-2264.43	121.342	-11.627	6.187	Q1_open_20_E1_44_71_18_13_0001_0001
-2242.26	105.747	-9.899	4.461	Q1_open_20_E1_44_71_18_13_0002_0001
-2141.96	693.197	-6.617	10.078	Q1_open_20_E1_44_71_19_13_0001_0001
-2296.9	104.959	-13.368	4.885	Q1_open_20_E1_44_71_19_13_0002_0001
-2229.27	438.605	-6.995	8.508	Q1_open_20_E1_44_71_1_13_0001_0001
-2267.49	186.834	-10.627	5.478	Q1_open_20_E1_44_71_1_13_0002_0001
-2251.11	675.814	-10.931	13.045	Q1_open_20_E1_44_71_20_13_0001_0001
-2242.69	492.895	-9.309	6.951	Q1_open_20_E1_44_71_20_13_0002_0001
-2177.68	281.917	-2.873	4.984	Q1_open_20_E1_44_71_2_13_0001_0001
-2248.92	78.941	-12.35	3.766	Q1_open_20_E1_44_71_2_13_0002_0001
-2237.86	212.229	-1.227	10.375	Q1_open_20_E1_44_71_3_13_0001_0001
-2250.61	206.258	-5.938	5.604	Q1_open_20_E1_44_71_3_13_0002_0001
-2240.57	112.198	-10.834	4.216	Q1_open_20_E1_44_71_4_13_0001_0001
-1708.18	231.261	-6.81	5.168	Q1_open_20_E1_44_71_4_13_0002_0001
-2251.42	513.503	-9.54	10.368	Q1_open_20_E1_44_71_5_13_0001_0001
-2263.64	142.59	-11.417	4.759	Q1_open_20_E1_44_71_5_13_0002_0001
-2264.97	115.416	-16.138	5.608	Q1_open_20_E1_44_71_6_13_0001_0001
-2244.5	303.362	-6.629	10.357	Q1_open_20_E1_44_71_6_13_0002_0001
-2233.52	301.233	-2.918	6.096	Q1_open_20_E1_44_71_7_13_0001_0001
-2248.02	521.274	-1.875	11.364	Q1_open_20_E1_44_71_7_13_0002_0001
-2236.37	550.017	-5.646	11.401	Q1_open_20_E1_44_71_8_13_0001_0001
-2254.57	105.761	-11.192	4.456	Q1_open_20_E1_44_71_8_13_0002_0001
-2256.92	225.156	-7.223	4.956	Q1_open_20_E1_44_71_9_13_0001_0001
-2242.31	206.972	-7.604	7.06	Q1_open_20_E1_44_71_9_13_0002_0001
-2296.31	133.836	-4.738	3.453	Q1_open_22_E1_44_71_10_13_0001_0001
-2376.67	156.41	-9.601	4.869	Q1_open_22_E1_44_71_10_13_0002_0001
-2294.24	63.816	-0.943	3.679	Q1_open_22_E1_44_71_11_13_0001_0001
-2296.16	122.712	-14.097	6.042	Q1_open_22_E1_44_71_11_13_0002_0001
-2303.02	526.267	-8.333	9.98	Q1_open_22_E1_44_71_12_13_0001_0001
-2323.07	111.383	-16.275	3.946	Q1_open_22_E1_44_71_12_13_0002_0001
-2281.05	117.187	-11.068	5.254	Q1_open_22_E1_44_71_13_13_0001_0001
-2454.34	70.294	-14.676	4.137	Q1_open_22_E1_44_71_13_13_0002_0001
-2281.89	181.293	-6.603	4.943	Q1_open_22_E1_44_71_14_13_0001_0001
-2295.22	182.903	-9.714	5.329	Q1_open_22_E1_44_71_14_13_0002_0001
-2358.83	711.876	-9.108	8.906	Q1_open_22_E1_44_71_15_13_0001_0001
-2277.03	130.3	-9.012	4.158	Q1_open_22_E1_44_71_15_13_0002_0001
-2259.77	100.935	-0.72	3.589	Q1_open_22_E1_44_71_16_13_0001_0001
-2388.19	218.138	-9.693	4.651	Q1_open_22_E1_44_71_16_13_0002_0001
-2302.53	641.482	-9.578	12.668	Q1_open_22_E1_44_71_17_13_0001_0001
-2309.32	164.486	-10.83	4.523	Q1_open_22_E1_44_71_17_13_0002_0001
-2274.36	231.685	-4.92	5.718	Q1_open_22_E1_44_71_18_13_0001_0001
-2408.58	146.968	-12.131	4.791	Q1_open_22_E1_44_71_18_13_0002_0001
-1935.81	351.718	-3.624	6.116	Q1_open_22_E1_44_71_19_13_0001_0001
-2390.55	138.591	-6.541	4.819	Q1_open_22_E1_44_71_19_13_0002_0001
-2043.28	684.581	-6.778	9.346	Q1_open_22_E1_44_71_1_13_0001_0001
-2288.59	216.567	-10.198	6.043	Q1_open_22_E1_44_71_1_13_0002_0001
-2283.51	182.196	-16.543	9.256	Q1_open_22_E1_44_71_20_13_0001_0001
-2307.51	111.762	-3.926	3.868	Q1_open_22_E1_44_71_20_13_0002_0001
-2332.59	49.931	-19.617	4.224	Q1_open_22_E1_44_71_2_13_0001_0001
-2394.07	179.76	-15.936	5.57	Q1_open_22_E1_44_71_2_13_0002_0001
-2263.65	194.321	-13.541	6.255	Q1_open_22_E1_44_71_3_13_0001_0001
-2306.72	94.093	-5.186	3.003	Q1_open_22_E1_44_71_3_13_0002_0001
-2310.32	146.99	-7.343	3.868	Q1_open_22_E1_44_71_4_13_0001_0001
-2242.08	92.177	-8.481	4.125	Q1_open_22_E1_44_71_4_13_0002_0001
-2335.15	271.677	-15.856	7.355	Q1_open_22_E1_44_71_5_13_0001_0001
-2313.35	137.357	-12.08	3.15	Q1_open_22_E1_44_71_5_13_0002_0001
-2459.65	186.542	-14.507	3.264	Q1_open_22_E1_44_71_6_13_0001_0001
-2326.72	119.137	-9.394	5.763	Q1_open_22_E1_44_71_6_13_0002_0001
-2278.15	148.345	-13.602	6.564	Q1_open_22_E1_44_71_7_13_0001_0001
-2383.39	215.841	-10.058	6.599	Q1_open_22_E1_44_71_7_13_0002_0001
-2301.21	139.027	-6.727	3.804	Q1_open_22_E1_44_71_8_13_0001_0001
-2330.63	225.281	-12.945	5.856	Q1_open_22_E1_44_71_8_13_0002_0001
-2394.14	171.101	-9.188	4.349	Q1_open_22_E1_44_71_9_13_0001_0001
-2255.63	236.067	-15.462	6.895	Q1_open_22_E1_44_71_9_13_0002_0001
-2687.21	141.858	-8.651	4.256	Q1_open_3_E1_44_71_10_13_0001_0001
-2701.86	103.212	-4.576	4.287	Q1_open_3_E1_44_71_10_13_0002_0001
-2655.65	223.061	-7.674	5.557	Q1_open_3_E1_44_71_11_13_0001_0001
-2709.05	231.619	-8.984	4.423	Q1_open_3_E1_44_71_11_13_0002_0001
-2691.21	121.068	-12.781	2.218	Q1_open_3_E1_44_71_12_13_0001_0001
-2674.5	159.684	-8.84	5.584	Q1_open_3_E1_44_71_12_13_0002_0001
-2721.67	87.351	-12.351	4.829	Q1_open_3_E1_44_71_13_13_0001_0001
-2711.66	264.743	-10.759	6.343	Q1_open_3_E1_44_71_13_13_0002_0001
-2654.12	790.999	-11.402	11.591	Q1_open_3_E1_44_71_14_13_0001_0001
-2708.22	163.747	-17.691	2.388	Q1_open_3_E1_44_71_14_13_0002_0001
-2708.44	167.377	-9.536	6.901	Q1_open_3_E1_44_71_15_13_0001_0001
-2725.34	206.22	-7.972	5.309	Q1_open_3_E1_44_71_15_13_0002_0001
-2673.76	1034.76	-3.169	22.184	Q1_open_3_E1_44_71_16_13_0001_0001
-2712.86	128.583	-11.447	4.045	Q1_open_3_E1_44_71_16_13_0002_0001
-2687.07	165.185	-7.016	4.861	Q1_open_3_E1_44_71_17_13_0001_0001
-2710.88	270.423	-5.001	5.565	Q1_open_3_E1_44_71_17_13_0002_0001
-2708.08	128.426	-12.321	4.599	Q1_open_3_E1_44_71_18_13_0001_0001
-2704.96	81.111	-10.682	3.424	Q1_open_3_E1_44_71_18_13_0002_0001
-2640.23	369.133	-12.802	5.404	Q1_open_3_E1_44_71_19_13_0001_0001
-2651.68	811.986	-1.753	9.107	Q1_open_3_E1_44_71_19_13_0002_0001
-2716.32	123.944	-16.713	8.51	Q1_open_3_E1_44_71_1_13_0001_0001
-2721.1	143.051	-9.611	4.541	Q1_open_3_E1_44_71_1_13_0002_0001
-2642.64	242.236	-5.427	5.39	Q1_open_3_E1_44_71_20_13_0001_0001
-2718.94	123.914	-12.868	4.979	Q1_open_3_E1_44_71_20_13_0002_0001
-2676.38	145.363	-10.639	4.683	Q1_open_3_E1_44_71_2_13_0001_0001
-2697.22	160.513	-7.839	5.791	Q1_open_3_E1_44_71_2_13_0002_0001
-2180.9	258.046	-6.06	4.567	Q1_open_3_E1_44_71_3_13_0001_0001
-2703.93	71.503	-15.148	3.863	Q1_open_3_E1_44_71_3_13_0002_0001
-2722.36	184.779	-14.988	5.438	Q1_open_3_E1_44_71_4_13_0001_0001
-2703.45	144.447	-10.37	4.669	Q1_open_3_E1_44_71_4_13_0002_0001
-2646.8	452.579	-5.664	10.359	Q1_open_3_E1_44_71_5_13_0001_0001
-2701.84	161.678	-3.25	4.395	Q1_open_3_E1_44_71_5_13_0002_0001
-2705.89	223.826	-2.642	5.499	Q1_open_3_E1_44_71_6_13_0001_0001
-2699.7	138.851	-12.067	3.57	Q1_open_3_E1_44_71_6_13_0002_0001
-2724.11	193.487	-13.374	6.509	Q1_open_3_E1_44_71_7_13_0001_0001
-2742.5	156.611	-15.404	4.719	Q1_open_3_E1_44_71_7_13_0002_0001
-2682.13	95.047	-6.866	6.024	Q1_open_3_E1_44_71_8_13_0001_0001
-2726.64	154.61	-14.251	7.46	Q1_open_3_E1_44_71_8_13_0002_0001
-2700.68	238.885	-7.293	6.658	Q1_open_3_E1_44_71_9_13_0001_0001
-2725.32	113.683	-11.16	5.155	Q1_open_3_E1_44_71_9_13_0002_0001
-3285.25	51.848	-7.347	5.229	Q1_open_6_E1_44_71_10_13_0001_0001
-3320.66	143.547	-8.583	4.501	Q1_open_6_E1_44_71_10_13_0002_0001
-3283.97	152.295	-15.019	6.062	Q1_open_6_E1_44_71_11_13_0001_0001
-3291.64	329.291	-6.293	6.159	Q1_open_6_E1_44_71_11_13_0002_0001
-3267.91	107.957	-5.26	4.667	Q1_open_6_E1_44_71_12_13_0001_0001
-3285.31	89.38	-17.137	6.503	Q1_open_6_E1_44_71_12_13_0002_0001
-3333.42	350.127	-10.908	6.955	Q1_open_6_E1_44_71_13_13_0001_0001
-3289.8	140.826	-7.171	3.562	Q1_open_6_E1_44_71_13_13_0002_0001
-3240.66	1066.49	-6.42	9.842	Q1_open_6_E1_44_71_14_13_0001_0001
-3252.03	410.585	-8.65	17.047	Q1_open_6_E1_44_71_14_13_0002_0001
-3285.13	475.93	-6.812	7.347	Q1_open_6_E1_44_71_15_13_0001_0001
-3284.71	120.297	-17.609	9.438	Q1_open_6_E1_44_71_15_13_0002_0001
-3287.64	99.559	-8.709	4.035	Q1_open_6_E1_44_71_16_13_0001_0001
-3323.01	123.631	-7.27	3.614	Q1_open_6_E1_44_71_16_13_0002_0001
-3297.87	779.125	-4.408	9.245	Q1_open_6_E1_44_71_17_13_0001_0001
-3284.92	119.678	-7.038	4.785	Q1_open_6_E1_44_71_17_13_0002_0001
-3283.91	70.382	-7.064	4.936	Q1_open_6_E1_44_71_18_13_0001_0001
-3264.57	377.163	-0.943	12.381	Q1_open_6_E1_44_71_18_13_0002_0001
-3276.5	94.8	-8.44	5.869	Q1_open_6_E1_44_71_19_13_0001_0001
-3288.3	390.297	-13.13	9.479	Q1_open_6_E1_44_71_19_13_0002_0001
-3303.13	481.92	-9.011	10.103	Q1_open_6_E1_44_71_1_13_0001_0001
-3336.36	140.436	-11.748	3.544	Q1_open_6_E1_44_71_1_13_0002_0001
-3303.31	101.728	-16.035	5.237	Q1_open_6_E1_44_71_20_13_0001_0001
-3292.49	93.322	-10.595	4.79	Q1_open_6_E1_44_71_20_13_0002_0001
-3315.33	246.167	-9.826	6.359	Q1_open_6_E1_44_71_2_13_0001_0001
-3276.41	92.836	-9.098	6.402	Q1_open_6_E1_44_71_2_13_0002_0001
-3314.22	1078.74	-6.488	10.49	Q1_open_6_E1_44_71_3_13_0001_0001
-3335.94	324.18	-11.069	8.712	Q1_open_6_E1_44_71_3_13_0002_0001
-3291.05	218.504	-19.564	6.214	Q1_open_6_E1_44_71_4_13_0001_0001
-3328.3	114.252	-7.341	4.611	Q1_open_6_E1_44_71_4_13_0002_0001
-3356.39	146.343	-16.563	3.567	Q1_open_6_E1_44_71_5_13_0001_0001
-3276.91	52.243	-7.698	6.606	Q1_open_6_E1_44_71_5_13_0002_0001
-3293.18	128.191	-12.677	4.423	Q1_open_6_E1_44_71_6_13_0001_0001
-3326.7	135.666	-12.143	3.62	Q1_open_6_E1_44_71_6_13_0002_0001
-3279.49	86.149	-12.347	6.24	Q1_open_6_E1_44_71_7_13_0001_0001
-3291.2	180.546	-4.941	3.712	Q1_open_6_E1_44_71_7_13_0002_0001
-3349.59	148.387	-17.335	2.79	Q1_open_6_E1_44_71_8_13_0001_0001
-3300.38	740.252	-11.977	9.781	Q1_open_6_E1_44_71_8_13_0002_0001
-3333.54	137.824	-11.345	4.903	Q1_open_6_E1_44_71_9_13_0001_0001
-3297.91	128.159	-14.479	4.83	Q1_open_6_E1_44_71_9_13_0002_0001
-2419.81	88.089	-12.712	3.761	Q1_open_9_E1_44_71_10_13_0001_0001
-2401.13	93.663	-4.368	3.427	Q1_open_9_E1_44_71_10_13_0002_0001
-2394.1	140.805	-8.281	4.668	Q1_open_9_E1_44_71_11_13_0001_0001
-2402.66	218.829	-10.221	6.842	Q1_open_9_E1_44_71_11_13_0002_0001
-2377.26	456.042	-4.656	13.239	Q1_open_9_E1_44_71_12_13_0001_0001
-2409.27	71.667	-10.361	4.302	Q1_open_9_E1_44_71_12_13_0002_0001
-2020.43	5312.82	-1.021	23.372	Q1_open_9_E1_44_71_13_13_0001_0001
-2471	265.86	-11.532	6.28	Q1_open_9_E1_44_71_13_13_0002_0001
-2416.37	254.087	-14.946	6.04	Q1_open_9_E1_44_71_14_13_0001_0001
-2393.41	94.957	-7.637	4.411	Q1_open_9_E1_44_71_14_13_0002_0001
-2378.75	191.203	-10.965	8.458	Q1_open_9_E1_44_71_15_13_0001_0001
-2403.31	431.211	-12.475	10.091	Q1_open_9_E1_44_71_15_13_0002_0001
-2458.52	187.178	-7.29	3.762	Q1_open_9_E1_44_71_16_13_0001_0001
-2415.49	85.823	-6.189	3.434	Q1_open_9_E1_44_71_16_13_0002_0001
-2258.64	469.776	-4.03	6.008	Q1_open_9_E1_44_71_17_13_0001_0001
-2403.77	257	-11.284	6.795	Q1_open_9_E1_44_71_17_13_0002_0001
-2399.25	156.544	-5.556	3.569	Q1_open_9_E1_44_71_18_13_0001_0001
-2397.63	158.213	-8.587	5.064	Q1_open_9_E1_44_71_18_13_0002_0001
-2373.15	207.287	-8.412	3.92	Q1_open_9_E1_44_71_19_13_0001_0001
-2419.34	66.255	-11.062	5.225	Q1_open_9_E1_44_71_19_13_0002_0001
-2384.88	119.92	-0.923	3.31	Q1_open_9_E1_44_71_1_13_0001_0001
-2400.73	192.729	-11.054	8.743	Q1_open_9_E1_44_71_1_13_0002_0001
-2411.55	426.576	-5.481	9.532	Q1_open_9_E1_44_71_20_13_0001_0001
-1760.15	202.481	-8.724	6.102	Q1_open_9_E1_44_71_20_13_0002_0001
-2393.73	168.442	-7.764	5	Q1_open_9_E1_44_71_2_13_0001_0001
-2390.05	47.839	-11.377	3.998	Q1_open_9_E1_44_71_2_13_0002_0001
-2480.45	194.135	-10.2	3.06	Q1_open_9_E1_44_71_3_13_0001_0001
-2462.42	224.899	-6.57	4.94	Q1_open_9_E1_44_71_3_13_0002_0001
-2473.95	276.365	-7.632	5.664	Q1_open_9_E1_44_71_4_13_0001_0001
-2403.46	156.254	-5.867	4.523	Q1_open_9_E1_44_71_4_13_0002_0001
-2421.05	278.923	-8.972	6.939	Q1_open_9_E1_44_71_5_13_0001_0001
-2408.07	1103.71	-1.566	14.011	Q1_open_9_E1_44_71_5_13_0002_0001
-2401.02	133.907	-7.56	4.259	Q1_open_9_E1_44_71_6_13_0001_0001
-2405.86	139.393	-9.435	3.602	Q1_open_9_E1_44_71_6_13_0002_0001
-2530.2	312.12	-9.38	4.721	Q1_open_9_E1_44_71_7_13_0001_0001
-2050.16	152.441	-3.073	4.013	Q1_open_9_E1_44_71_7_13_0002_0001
-2451.09	119.548	-17.744	6.352	Q1_open_9_E1_44_71_8_13_0001_0001
-2413.59	320.834	-3.813	7.26	Q1_open_9_E1_44_71_8_13_0002_0001
-2490.39	247.815	-13.773	4.032	Q1_open_9_E1_44_71_9_13_0001_0001
-2424.49	80.498	-13.179	4.475	Q1_open_9_E1_44_71_9_13_0002_0001
-2404.03	181.839	-12.982	2.88	Q1_open_11_E1_44_71_10_14_0001_0001
-2395.82	120.499	-15.371	4.82	Q1_open_11_E1_44_71_10_14_0002_0001
-2379.32	341.779	-3.886	5.926	Q1_open_11_E1_44_71_11_14_0001_0001
-2396.47	829.398	-6.145	13.786	Q1_open_11_E1_44_71_11_14_0002_0001
-2391.4	108.678	-20.304	2.526	Q1_open_11_E1_44_71_12_14_0001_0001
-2421.94	171.791	-16.387	5.131	Q1_open_11_E1_44_71_12_14_0002_0001
-2383.04	284.011	-10.193	6.13	Q1_open_11_E1_44_71_13_14_0001_0001
-2361.54	175.602	-7.506	4.597	Q1_open_11_E1_44_71_13_14_0002_0001
-2396.48	676.522	-7.312	9.563	Q1_open_11_E1_44_71_14_14_0001_0001
-2392.42	149.711	-5.525	5.66	Q1_open_11_E1_44_71_14_14_0002_0001
-2397.71	775.364	-8.533	14.535	Q1_open_11_E1_44_71_15_14_0001_0001
-2152.43	105.221	-5.389	7.214	Q1_open_11_E1_44_71_15_14_0002_0001
-2402.1	85.525	-14.735	4.647	Q1_open_11_E1_44_71_16_14_0001_0001
-2403.09	102.724	-10.363	5.92	Q1_open_11_E1_44_71_16_14_0002_0001
-2222.9	115.996	-7.969	4.917	Q1_open_11_E1_44_71_17_14_0001_0001
-2375.28	87.82	-20.624	3.22	Q1_open_11_E1_44_71_17_14_0002_0001
-2395.98	531.505	-7.62	8.787	Q1_open_11_E1_44_71_18_14_0001_0001
-2395.54	235.395	-15.763	5.498	Q1_open_11_E1_44_71_18_14_0002_0001
-2383.89	173.051	-9.285	5.012	Q1_open_11_E1_44_71_19_14_0001_0001
-2364.31	105.113	-5.893	4.061	Q1_open_11_E1_44_71_19_14_0002_0001
-1949.7	1599.13	-1.668	12.533	Q1_open_11_E1_44_71_1_14_0001_0001
-2398.33	358.939	-5.233	10.036	Q1_open_11_E1_44_71_1_14_0002_0001
-2269.98	224.862	-5.795	5.56	Q1_open_11_E1_44_71_20_14_0001_0001
-2415.62	301.223	-17.236	9.814	Q1_open_11_E1_44_71_20_14_0002_0001
-2302.67	457.193	-4.211	17.137	Q1_open_11_E1_44_71_2_14_0001_0001
-2179.6	450.75	-4.333	12.245	Q1_open_11_E1_44_71_2_14_0002_0001
-2303.94	194.519	-4.417	4.891	Q1_open_11_E1_44_71_3_14_0001_0001
-2189.39	278.333	-4.245	6.197	Q1_open_11_E1_44_71_3_14_0002_0001
-2383.55	291.508	-9.088	6.33	Q1_open_11_E1_44_71_4_14_0001_0001
-2365.98	374.151	-5.23	9.043	Q1_open_11_E1_44_71_4_14_0002_0001
-2398.14	125.303	-19.461	7.437	Q1_open_11_E1_44_71_5_14_0001_0001
-2361.28	439.467	-3.874	7.237	Q1_open_11_E1_44_71_5_14_0002_0001
-2389.49	239.592	-10.508	12.922	Q1_open_11_E1_44_71_6_14_0001_0001
-2406.89	103.315	-11.466	2.484	Q1_open_11_E1_44_71_6_14_0002_0001
-2422.59	142.235	-15.666	4.683	Q1_open_11_E1_44_71_7_14_0001_0001
-2378.91	114.453	-7.053	4.802	Q1_open_11_E1_44_71_7_14_0002_0001
-2402.8	279.847	-12.864	6.186	Q1_open_11_E1_44_71_8_14_0001_0001
-2346.74	150.295	-9.984	3.114	Q1_open_11_E1_44_71_8_14_0002_0001
-2381.17	100.506	-13.895	5.913	Q1_open_11_E1_44_71_9_14_0001_0001
-2407.85	103.311	-22.814	7.116	Q1_open_11_E1_44_71_9_14_0002_0001
-2463.69	88.214	-12.752	6.115	Q1_open_17_E1_44_71_10_14_0001_0001
-2467.86	150.447	-6.738	4.885	Q1_open_17_E1_44_71_10_14_0002_0001
-2521.89	230.864	-13.987	5.191	Q1_open_17_E1_44_71_11_14_0001_0001
-2464.49	109.187	-10.693	5.374	Q1_open_17_E1_44_71_11_14_0002_0001
-2533.77	123.781	-13.701	4.07	Q1_open_17_E1_44_71_12_14_0001_0001
-2461.01	67.219	-14.696	4.076	Q1_open_17_E1_44_71_12_14_0002_0001
-2550.21	207.019	-12.65	4.086	Q1_open_17_E1_44_71_13_14_0001_0001
-2542.18	146.604	-13.011	3.855	Q1_open_17_E1_44_71_13_14_0002_0001
-2462.51	60.695	-16.042	3.764	Q1_open_17_E1_44_71_14_14_0001_0001
-2471.58	88.089	-14.181	4.457	Q1_open_17_E1_44_71_14_14_0002_0001
-2446.93	250.47	-10.293	9.696	Q1_open_17_E1_44_71_15_14_0001_0001
-2530.41	217.193	-5.932	4.831	Q1_open_17_E1_44_71_15_14_0002_0001
-2436.82	174.293	-5.661	5.176	Q1_open_17_E1_44_71_16_14_0001_0001
-2464.36	145.126	-7.524	4.7	Q1_open_17_E1_44_71_16_14_0002_0001
-2561.23	197.832	-16.968	4.096	Q1_open_17_E1_44_71_17_14_0001_0001
-2448.97	150.625	-11.849	5.858	Q1_open_17_E1_44_71_17_14_0002_0001
-2444.81	139.253	-10.201	5.76	Q1_open_17_E1_44_71_18_14_0001_0001
-2453.86	85.727	-6.582	4.178	Q1_open_17_E1_44_71_18_14_0002_0001
-2462.08	66.552	-9.192	4.784	Q1_open_17_E1_44_71_19_14_0001_0001
-2455.85	99.947	-10.038	3.769	Q1_open_17_E1_44_71_19_14_0002_0001
-2502.28	37.182	-14.153	4.021	Q1_open_17_E1_44_71_1_14_0001_0001
-2455.45	630.384	-7.162	11.653	Q1_open_17_E1_44_71_1_14_0002_0001
-2288.8	378.29	-5.621	7.253	Q1_open_17_E1_44_71_20_14_0001_0001
-2473.55	57.736	-10.865	4.654	Q1_open_17_E1_44_71_20_14_0002_0001
-2457.92	969.204	-5.274	10.894	Q1_open_17_E1_44_71_2_14_0001_0001
-2559.06	99.616	-17.636	4.694	Q1_open_17_E1_44_71_2_14_0002_0001
-2474.82	65.549	-13.221	4.078	Q1_open_17_E1_44_71_3_14_0001_0001
-2451.03	211.615	-3.95	5.988	Q1_open_17_E1_44_71_3_14_0002_0001
-2483.6	173.559	-14.558	6.376	Q1_open_17_E1_44_71_4_14_0001_0001
-2454.86	100.017	-8.365	3.146	Q1_open_17_E1_44_71_4_14_0002_0001
-2469.22	270.254	-9.234	7.2	Q1_open_17_E1_44_71_5_14_0001_0001
-2536.13	217.706	-10.472	4.901	Q1_open_17_E1_44_71_5_14_0002_0001
-2469.26	524.396	-11.405	10.028	Q1_open_17_E1_44_71_6_14_0001_0001
-2360.65	1461.67	-3.179	22.884	Q1_open_17_E1_44_71_6_14_0002_0001
-2366.55	243.439	-6.417	6.68	Q1_open_17_E1_44_71_7_14_0001_0001
-2478.61	224.317	-10.375	6.908	Q1_open_17_E1_44_71_7_14_0002_0001
-2454.01	128.562	-10.726	3.819	Q1_open_17_E1_44_71_8_14_0001_0001
-2481.33	88.917	-21.964	6.677	Q1_open_17_E1_44_71_8_14_0002_0001
-2452.28	347.343	-9.144	9.293	Q1_open_17_E1_44_71_9_14_0001_0001
-2458.12	77.701	-12.467	3.648	Q1_open_17_E1_44_71_9_14_0002_0001
-2438.11	396.947	-10.206	6.73	Q1_open_18_E1_44_71_10_14_0001_0001
-2420.88	82.755	-8.912	2.867	Q1_open_18_E1_44_71_10_14_0002_0001
-2418.05	292.43	-7.205	7.289	Q1_open_18_E1_44_71_11_14_0001_0001
-2430.86	222.135	-8.883	4.33	Q1_open_18_E1_44_71_11_14_0002_0001
-2384.6	111.304	-20.097	1.563	Q1_open_18_E1_44_71_12_14_0001_0001
-2400.92	104.071	-9.857	4.884	Q1_open_18_E1_44_71_12_14_0002_0001
-2391.18	123.319	-12.949	2.316	Q1_open_18_E1_44_71_13_14_0001_0001
-2447.39	214.592	-11.907	4.116	Q1_open_18_E1_44_71_13_14_0002_0001
-2391.13	165.691	-15.194	2.641	Q1_open_18_E1_44_71_14_14_0001_0001
-2386	242.805	-10.02	4.072	Q1_open_18_E1_44_71_14_14_0002_0001
-2345.69	132.021	-5.027	6.37	Q1_open_18_E1_44_71_15_14_0001_0001
-2404.37	60.115	-12.296	4.332	Q1_open_18_E1_44_71_15_14_0002_0001
-2422.32	177.118	-15.842	5.873	Q1_open_18_E1_44_71_16_14_0001_0001
-2412.29	95.236	-2.324	4.397	Q1_open_18_E1_44_71_16_14_0002_0001
-2409.96	312.225	-12.246	7.222	Q1_open_18_E1_44_71_17_14_0001_0001
-2397.96	269.305	-11.563	6.902	Q1_open_18_E1_44_71_17_14_0002_0001
-2383.73	685.655	-5.221	9.568	Q1_open_18_E1_44_71_18_14_0001_0001
-2390.46	130.56	-10.087	4.406	Q1_open_18_E1_44_71_18_14_0002_0001
-2371.45	471.984	-6.947	7.495	Q1_open_18_E1_44_71_19_14_0001_0001
-2353.08	170.49	-9.698	5.768	Q1_open_18_E1_44_71_19_14_0002_0001
-2401.58	299.797	-6.535	7.433	Q1_open_18_E1_44_71_1_14_0001_0001
-2390.55	176.404	-12.275	6.129	Q1_open_18_E1_44_71_1_14_0002_0001
-2328.84	237.352	-15.23	7.553	Q1_open_18_E1_44_71_20_14_0001_0001
-2389.99	643.595	-9.201	13.245	Q1_open_18_E1_44_71_20_14_0002_0001
-2362.51	146.414	-8.935	10.965	Q1_open_18_E1_44_71_2_14_0001_0001
-2414	91.245	-15.352	3.966	Q1_open_18_E1_44_71_2_14_0002_0001
-2415.11	80.113	-12.285	4.421	Q1_open_18_E1_44_71_3_14_0001_0001
-2388.31	89.821	-9.47	2.754	Q1_open_18_E1_44_71_3_14_0002_0001
-2416.63	108.122	-8.481	4.059	Q1_open_18_E1_44_71_4_14_0001_0001
-2421.81	92.271	-12.62	3.972	Q1_open_18_E1_44_71_4_14_0002_0001
-2414.96	324.738	-14.1	7.278	Q1_open_18_E1_44_71_5_14_0001_0001
-2427.28	500.891	-8.116	7.182	Q1_open_18_E1_44_71_5_14_0002_0001
-2392.31	126.656	-11.796	7.24	Q1_open_18_E1_44_71_6_14_0001_0001
-2177.37	222.705	-6.796	6.379	Q1_open_18_E1_44_71_6_14_0002_0001
-2449.72	231.798	-8.631	5.582	Q1_open_18_E1_44_71_7_14_0001_0001
-2429.28	97.386	-24.997	6.73	Q1_open_18_E1_44_71_7_14_0002_0001
-2415.55	216.573	-9.606	4.455	Q1_open_18_E1_44_71_8_14_0001_0001
-2482.77	693.336	-11.212	8.452	Q1_open_18_E1_44_71_8_14_0002_0001
-2388.31	275.714	-5.872	6.456	Q1_open_18_E1_44_71_9_14_0001_0001
-2402.08	181.665	-13.308	6.758	Q1_open_18_E1_44_71_9_14_0002_0001
-2245.58	165.507	-7.676	3.293	Q1_open_20_E1_44_71_10_14_0001_0001
-2264.47	119.373	-20.298	7.848	Q1_open_20_E1_44_71_10_14_0002_0001
-2223.25	189.596	-10.965	7.187	Q1_open_20_E1_44_71_11_14_0001_0001
-2243.45	135.544	-11.644	3.73	Q1_open_20_E1_44_71_11_14_0002_0001
-2077.39	170.087	-13.209	5.208	Q1_open_20_E1_44_71_12_14_0001_0001
-2202.8	181.71	-8.257	5.134	Q1_open_20_E1_44_71_12_14_0002_0001
-2324.63	459.831	-8.477	6.602	Q1_open_20_E1_44_71_13_14_0001_0001
-2242.11	445.684	-3.089	9.086	Q1_open_20_E1_44_71_13_14_0002_0001
-2227.45	139.428	-3.712	3.57	Q1_open_20_E1_44_71_14_14_0001_0001
-2147.12	234.919	-13.09	5.682	Q1_open_20_E1_44_71_14_14_0002_0001
-2249.52	116.508	-13.759	3.603	Q1_open_20_E1_44_71_15_14_0001_0001
-2155.42	317.569	-12.75	7.377	Q1_open_20_E1_44_71_15_14_0002_0001
-2219.91	134.151	-5.19	5.523	Q1_open_20_E1_44_71_16_14_0001_0001
-2258.54	72.526	-6.997	3.988	Q1_open_20_E1_44_71_16_14_0002_0001
-2254.02	234.171	-15.068	7.472	Q1_open_20_E1_44_71_17_14_0001_0001
-2261.34	149.944	-15.643	4.67	Q1_open_20_E1_44_71_17_14_0002_0001
-2254.6	165.645	-13.484	2.631	Q1_open_20_E1_44_71_18_14_0001_0001
-2250.58	1018.92	-0.93	10.612	Q1_open_20_E1_44_71_18_14_0002_0001
-1849.57	217.693	-9.37	6.145	Q1_open_20_E1_44_71_19_14_0001_0001
-2265.9	181.349	-11.26	5.623	Q1_open_20_E1_44_71_19_14_0002_0001
-2263.06	142.083	-8.139	4.672	Q1_open_20_E1_44_71_1_14_0001_0001
-2189.57	132.803	-11.881	5.44	Q1_open_20_E1_44_71_1_14_0002_0001
-2197.75	188.483	-6.709	4.264	Q1_open_20_E1_44_71_20_14_0001_0001
-2255.7	557.737	-2.735	7.13	Q1_open_20_E1_44_71_20_14_0002_0001
-2197.9	207.219	-6.33	6.352	Q1_open_20_E1_44_71_2_14_0001_0001
-2184.68	192.19	-7.551	4.402	Q1_open_20_E1_44_71_2_14_0002_0001
-2266.12	145.832	-11.547	5.759	Q1_open_20_E1_44_71_3_14_0001_0001
-2253.77	96.591	-8.497	4.759	Q1_open_20_E1_44_71_3_14_0002_0001
-2251.42	134.432	-10.619	6.182	Q1_open_20_E1_44_71_4_14_0001_0001
-2215.14	111.112	-10.555	8.392	Q1_open_20_E1_44_71_4_14_0002_0001
-2045.28	238.535	-4.989	6.453	Q1_open_20_E1_44_71_5_14_0001_0001
-2265.76	99.901	-15.966	4.353	Q1_open_20_E1_44_71_5_14_0002_0001
-2225.47	967.16	-3.265	8.965	Q1_open_20_E1_44_71_6_14_0001_0001
-2226.91	218.807	-12.314	6.451	Q1_open_20_E1_44_71_6_14_0002_0001
-2223.02	169.397	-11.045	4.695	Q1_open_20_E1_44_71_7_14_0001_0001
-2239.69	106.224	-9.334	4.71	Q1_open_20_E1_44_71_7_14_0002_0001
-2271.58	117.66	-18.395	3.791	Q1_open_20_E1_44_71_8_14_0001_0001
-2247.92	135.594	-9.236	4.383	Q1_open_20_E1_44_71_8_14_0002_0001
-2145.82	344.147	-10.56	7.449	Q1_open_20_E1_44_71_9_14_0001_0001
-2256.44	100.551	-12.563	3.425	Q1_open_20_E1_44_71_9_14_0002_0001
-1874.1	240.53	-3.121	5.074	Q1_open_22_E1_44_71_10_14_0001_0001
-2305.57	47.414	-13.455	5.738	Q1_open_22_E1_44_71_10_14_0002_0001
-2286.06	110.615	-2.424	3.569	Q1_open_22_E1_44_71_11_14_0001_0001
-2240.25	52.157	-12.065	2.961	Q1_open_22_E1_44_71_11_14_0002_0001
-2311.03	136.82	-13.1	4.901	Q1_open_22_E1_44_71_12_14_0001_0001
-2361.18	46.697	-11.919	3.641	Q1_open_22_E1_44_71_12_14_0002_0001
-2283.37	176.792	-12.457	6.36	Q1_open_22_E1_44_71_13_14_0001_0001
-2373.53	74.432	-14.934	2.48	Q1_open_22_E1_44_71_13_14_0002_0001
-2395	165.499	-12.99	2.811	Q1_open_22_E1_44_71_14_14_0001_0001
-2293.98	354.941	-2.559	6.01	Q1_open_22_E1_44_71_14_14_0002_0001
-2306.99	349.193	-9.943	8.693	Q1_open_22_E1_44_71_15_14_0001_0001
-2433.51	62.489	-12.448	4.856	Q1_open_22_E1_44_71_15_14_0002_0001
-2287.85	117.661	-5.759	5.431	Q1_open_22_E1_44_71_16_14_0001_0001
-2317.26	84.574	-13.601	5.472	Q1_open_22_E1_44_71_16_14_0002_0001
-2189.32	104.626	-10.748	4.612	Q1_open_22_E1_44_71_17_14_0001_0001
-2306.24	146.278	-8.192	6.179	Q1_open_22_E1_44_71_17_14_0002_0001
-2316.85	699.393	-12.916	15.778	Q1_open_22_E1_44_71_18_14_0001_0001
-2393.29	124.312	-9.853	4.271	Q1_open_22_E1_44_71_18_14_0002_0001
-1940.39	102.043	-0.556	6.433	Q1_open_22_E1_44_71_19_14_0001_0001
-2378.19	148.203	-7.623	4.708	Q1_open_22_E1_44_71_19_14_0002_0001
-2300.2	156.293	-14.051	6.439	Q1_open_22_E1_44_71_1_14_0001_0001
-2257.08	430.729	-5.919	8.428	Q1_open_22_E1_44_71_1_14_0002_0001
-2437.42	113.024	-9.992	2.673	Q1_open_22_E1_44_71_20_14_0001_0001
-2387.73	108.661	-8.992	2.527	Q1_open_22_E1_44_71_20_14_0002_0001
-2278.12	92.369	-9.551	5.405	Q1_open_22_E1_44_71_2_14_0001_0001
-2304.76	69.656	-12.638	3.897	Q1_open_22_E1_44_71_2_14_0002_0001
-2384.44	563.866	-11.032	8.226	Q1_open_22_E1_44_71_3_14_0001_0001
-2304.85	355.964	-8.669	10.432	Q1_open_22_E1_44_71_3_14_0002_0001
-2289.65	51.244	-8.181	5.963	Q1_open_22_E1_44_71_4_14_0001_0001
-2277.15	142.442	-11.634	4.734	Q1_open_22_E1_44_71_4_14_0002_0001
-2309.62	361.558	-7.948	7.579	Q1_open_22_E1_44_71_5_14_0001_0001
-2307.68	648.928	-2.49	10.406	Q1_open_22_E1_44_71_5_14_0002_0001
-2380.37	68.389	-21.799	2.505	Q1_open_22_E1_44_71_6_14_0001_0001
-2307.13	93.062	-6.29	4.615	Q1_open_22_E1_44_71_6_14_0002_0001
-2285.26	195.189	-14.159	6.842	Q1_open_22_E1_44_71_7_14_0001_0001
-2314.64	145.458	-8.535	3.705	Q1_open_22_E1_44_71_7_14_0002_0001
-1334.97	404.053	-8.658	9.759	Q1_open_22_E1_44_71_8_14_0001_0001
-2301.45	121.794	-4.531	3.347	Q1_open_22_E1_44_71_8_14_0002_0001
-2284.28	131.989	-8.394	3.917	Q1_open_22_E1_44_71_9_14_0001_0001
-2305.78	105.955	-5.49	4.277	Q1_open_22_E1_44_71_9_14_0002_0001
-2686.92	291.222	-10.225	6.353	Q1_open_3_E1_44_71_10_14_0001_0001
-2709.58	193.55	-7.103	6.386	Q1_open_3_E1_44_71_10_14_0002_0001
-2722.41	215.713	-9.862	5.882	Q1_open_3_E1_44_71_11_14_0001_0001
-2694.67	140.354	-7.459	2.755	Q1_open_3_E1_44_71_11_14_0002_0001
-2698.03	284.701	-5.136	6.243	Q1_open_3_E1_44_71_12_14_0001_0001
-2691.42	201.558	-10.354	5.636	Q1_open_3_E1_44_71_12_14_0002_0001
-2706.24	115.214	-13.275	2.807	Q1_open_3_E1_44_71_13_14_0001_0001
-2706.05	93.006	-12.926	3.304	Q1_open_3_E1_44_71_13_14_0002_0001
-2707.69	185.738	-14.225	5.917	Q1_open_3_E1_44_71_14_14_0001_0001
-2721.39	336.652	-14.554	7.676	Q1_open_3_E1_44_71_14_14_0002_0001
-2695.5	286.006	-5.583	6.111	Q1_open_3_E1_44_71_15_14_0001_0001
-2701.14	59.528	-12.193	5.12	Q1_open_3_E1_44_71_15_14_0002_0001
-2466.11	377.473	-8.296	5.152	Q1_open_3_E1_44_71_16_14_0001_0001
-2670.59	155.464	-4.028	5.699	Q1_open_3_E1_44_71_16_14_0002_0001
-2725.47	245.489	-16.714	6.669	Q1_open_3_E1_44_71_17_14_0001_0001
-2662.3	1109.31	-7.322	16.989	Q1_open_3_E1_44_71_17_14_0002_0001
-2722.61	263.729	-8.527	7.038	Q1_open_3_E1_44_71_18_14_0001_0001
-2729.73	119.342	-13.115	4.766	Q1_open_3_E1_44_71_18_14_0002_0001
-2711.82	164.619	-11.943	2.784	Q1_open_3_E1_44_71_19_14_0001_0001
-2657.44	179.066	-5.718	6.961	Q1_open_3_E1_44_71_19_14_0002_0001
-2699.78	258.499	-8.967	6.199	Q1_open_3_E1_44_71_1_14_0001_0001
-2701.27	658.703	-9.904	11.427	Q1_open_3_E1_44_71_1_14_0002_0001
-2703.02	252.262	-9.17	5.775	Q1_open_3_E1_44_71_20_14_0001_0001
-2707.62	137.612	-14.582	5.022	Q1_open_3_E1_44_71_20_14_0002_0001
-2694.51	123.81	-10.197	4.524	Q1_open_3_E1_44_71_2_14_0001_0001
-2687.95	106.738	-8.281	6.271	Q1_open_3_E1_44_71_2_14_0002_0001
-2711.12	163.737	-13.894	6.302	Q1_open_3_E1_44_71_3_14_0001_0001
-2686.61	108.956	-10.205	3.344	Q1_open_3_E1_44_71_3_14_0002_0001
-2714.36	94.787	-20.363	1.647	Q1_open_3_E1_44_71_4_14_0001_0001
-2729.79	110.43	-11.092	5.005	Q1_open_3_E1_44_71_4_14_0002_0001
-2703.97	193.985	-12.014	2.936	Q1_open_3_E1_44_71_5_14_0001_0001
-2723.72	105.161	-12.457	5.392	Q1_open_3_E1_44_71_5_14_0002_0001
-2698.07	74.266	-12.964	3.988	Q1_open_3_E1_44_71_6_14_0001_0001
-2720.69	133.012	-13.526	5.887	Q1_open_3_E1_44_71_6_14_0002_0001
-2725.72	242.4	-11.904	6.006	Q1_open_3_E1_44_71_7_14_0001_0001
-2709.39	135.243	-12.323	3.804	Q1_open_3_E1_44_71_7_14_0002_0001
-2616.57	295.605	-5.378	5.637	Q1_open_3_E1_44_71_8_14_0001_0001
-2705.42	152.48	-8.667	4.905	Q1_open_3_E1_44_71_8_14_0002_0001
-2707.24	996.204	-6.083	12.143	Q1_open_3_E1_44_71_9_14_0001_0001
-2708.01	613.102	-7.775	9.042	Q1_open_3_E1_44_71_9_14_0002_0001
-3323.76	161.433	-19.217	4.658	Q1_open_6_E1_44_71_10_14_0001_0001
-3297.31	261.414	-2.2	4.585	Q1_open_6_E1_44_71_10_14_0002_0001
-3276.3	215.041	-10.622	4.813	Q1_open_6_E1_44_71_11_14_0001_0001
-3325.14	307.75	-10.358	6.517	Q1_open_6_E1_44_71_11_14_0002_0001
-3284.56	106.881	-12.601	5.055	Q1_open_6_E1_44_71_12_14_0001_0001
-3287.76	296.572	-9.16	5.442	Q1_open_6_E1_44_71_12_14_0002_0001
-3298.17	149.486	-13.076	4.815	Q1_open_6_E1_44_71_13_14_0001_0001
-3291.74	272.948	-4.654	5.625	Q1_open_6_E1_44_71_13_14_0002_0001
-3333.36	355.284	-8.183	6.663	Q1_open_6_E1_44_71_14_14_0001_0001
-3318.71	182.845	-16.794	4.257	Q1_open_6_E1_44_71_14_14_0002_0001
-3302.29	116.87	-18.51	6.017	Q1_open_6_E1_44_71_15_14_0001_0001
-3267.79	85.032	-6.012	6.491	Q1_open_6_E1_44_71_15_14_0002_0001
-3267.08	1022.2	-7.397	11.111	Q1_open_6_E1_44_71_16_14_0001_0001
-3286.29	86.464	-9.498	5.15	Q1_open_6_E1_44_71_16_14_0002_0001
-3332.77	246.636	-16.917	4.451	Q1_open_6_E1_44_71_17_14_0001_0001
-3313.05	253.214	-5.578	5.277	Q1_open_6_E1_44_71_17_14_0002_0001
-3304.97	951.362	-4.1	11.627	Q1_open_6_E1_44_71_18_14_0001_0001
-3330.64	793.999	-4.064	8.702	Q1_open_6_E1_44_71_18_14_0002_0001
-3343.02	169.942	-9.718	5.787	Q1_open_6_E1_44_71_19_14_0001_0001
-3264.29	80.464	-9.465	4.652	Q1_open_6_E1_44_71_19_14_0002_0001
-3287.14	215.98	-6.144	6.446	Q1_open_6_E1_44_71_1_14_0001_0001
-3284.44	122.649	-6.149	3.568	Q1_open_6_E1_44_71_1_14_0002_0001
-3272.33	141.067	-9.999	5.093	Q1_open_6_E1_44_71_20_14_0001_0001
-3284.15	95.852	-11.706	6.326	Q1_open_6_E1_44_71_20_14_0002_0001
-3318.56	212.935	-8.909	4.711	Q1_open_6_E1_44_71_2_14_0001_0001
-3279.61	108.843	-11.969	7.067	Q1_open_6_E1_44_71_2_14_0002_0001
-3292.74	441.657	-5.378	10.066	Q1_open_6_E1_44_71_3_14_0001_0001
-3294.5	453.941	-6.138	10.029	Q1_open_6_E1_44_71_3_14_0002_0001
-3267.11	165.43	-5.359	5.622	Q1_open_6_E1_44_71_4_14_0001_0001
-3258.66	185.249	-10.297	6.891	Q1_open_6_E1_44_71_4_14_0002_0001
-3250.38	121.443	-2.949	5.546	Q1_open_6_E1_44_71_5_14_0001_0001
-3262.46	671.07	-1.37	7.758	Q1_open_6_E1_44_71_5_14_0002_0001
-3322.92	315.705	-11.894	6.152	Q1_open_6_E1_44_71_6_14_0001_0001
-3288.09	138.494	-8.809	7.593	Q1_open_6_E1_44_71_6_14_0002_0001
-3329.09	162.271	-11.507	6.324	Q1_open_6_E1_44_71_7_14_0001_0001
-3330.12	192.892	-7.371	5.569	Q1_open_6_E1_44_71_7_14_0002_0001
-3290.08	148.018	-13.173	6.288	Q1_open_6_E1_44_71_8_14_0001_0001
-3330.41	229.322	-11.497	6.865	Q1_open_6_E1_44_71_8_14_0002_0001
-3306.14	394.63	-12.653	9.419	Q1_open_6_E1_44_71_9_14_0001_0001
-3257.06	438.925	-5.019	7.64	Q1_open_6_E1_44_71_9_14_0002_0001
-2270.07	3097.08	-1.252	17.762	Q1_open_9_E1_44_71_10_14_0001_0001
-2404.98	248.143	-4.949	5.788	Q1_open_9_E1_44_71_10_14_0002_0001
-2362.95	164.451	-11.85	6.328	Q1_open_9_E1_44_71_11_14_0001_0001
-2407.88	67.526	-12.96	5.592	Q1_open_9_E1_44_71_11_14_0002_0001
-2407.02	239.91	-11.249	8.766	Q1_open_9_E1_44_71_12_14_0001_0001
-2361.69	121.824	-13.303	5.668	Q1_open_9_E1_44_71_12_14_0002_0001
-2384.24	287.166	-12.613	6.589	Q1_open_9_E1_44_71_13_14_0001_0001
-2420.97	70.703	-15.459	5.525	Q1_open_9_E1_44_71_13_14_0002_0001
-2410.25	750.409	-11.157	11.452	Q1_open_9_E1_44_71_14_14_0001_0001
-2414.93	71.145	-13.114	5.048	Q1_open_9_E1_44_71_14_14_0002_0001
-2386.04	124.555	-11.23	6.656	Q1_open_9_E1_44_71_15_14_0001_0001
-2369.1	281.232	-6.781	6.189	Q1_open_9_E1_44_71_15_14_0002_0001
-2419.72	147.058	-8.767	5.189	Q1_open_9_E1_44_71_16_14_0001_0001
-2399.32	72.117	-7.411	3.537	Q1_open_9_E1_44_71_16_14_0002_0001
-2384.85	149.638	-12.727	4.255	Q1_open_9_E1_44_71_17_14_0001_0001
-2404.64	263.184	-12.611	7.401	Q1_open_9_E1_44_71_17_14_0002_0001
-2467.43	112.356	-5.396	4.771	Q1_open_9_E1_44_71_18_14_0001_0001
-2332.73	427.435	-7.685	13.098	Q1_open_9_E1_44_71_18_14_0002_0001
-2404.1	236.836	-4.016	7.433	Q1_open_9_E1_44_71_19_14_0001_0001
-2402.97	320.989	-8.359	7.949	Q1_open_9_E1_44_71_19_14_0002_0001
-2402.17	297.025	-9.173	7.267	Q1_open_9_E1_44_71_1_14_0001_0001
-2412.28	120.625	-5.953	4.528	Q1_open_9_E1_44_71_1_14_0002_0001
-2408.36	109.874	-1.724	6.131	Q1_open_9_E1_44_71_20_14_0001_0001
-2398.75	63.381	-11.677	5.692	Q1_open_9_E1_44_71_20_14_0002_0001
-2392.55	64.558	-8.803	4.573	Q1_open_9_E1_44_71_2_14_0001_0001
-2382.95	1112.07	-1.298	21.025	Q1_open_9_E1_44_71_2_14_0002_0001
-2134.34	2888.94	-4.029	14.496	Q1_open_9_E1_44_71_3_14_0001_0001
-2381.79	57.982	-6.983	3.689	Q1_open_9_E1_44_71_3_14_0002_0001
-2285.37	253.721	-11.328	5.808	Q1_open_9_E1_44_71_4_14_0001_0001
-2396.7	180.072	-9.115	5.713	Q1_open_9_E1_44_71_4_14_0002_0001
-2400.76	132.509	-8.573	2.014	Q1_open_9_E1_44_71_5_14_0001_0001
-2411.94	286.544	-9.171	7.816	Q1_open_9_E1_44_71_5_14_0002_0001
-2416.7	186.414	-3.615	11.476	Q1_open_9_E1_44_71_6_14_0001_0001
-2399.24	132.294	-4.642	4.232	Q1_open_9_E1_44_71_6_14_0002_0001
-1887.42	252.894	-4.749	6.715	Q1_open_9_E1_44_71_7_14_0001_0001
-2400.39	129.62	-10.134	5.242	Q1_open_9_E1_44_71_7_14_0002_0001
-2475.68	206.931	-9.636	3.789	Q1_open_9_E1_44_71_8_14_0001_0001
-2424.26	194.124	-13.166	6.229	Q1_open_9_E1_44_71_8_14_0002_0001
-2467.8	104.547	-14.102	1.374	Q1_open_9_E1_44_71_9_14_0001_0001
-2400.43	89.855	-11.889	1.932	Q1_open_9_E1_44_71_9_14_0002_0001
-2399.74	1290.35	-3.588	10.869	Q1_open_11_E1_44_71_10_15_0001_0001
-2322.17	255.769	-4.943	6.332	Q1_open_11_E1_44_71_10_15_0002_0001
-2395.4	136.33	-14.192	2.572	Q1_open_11_E1_44_71_11_15_0001_0001
-2379.45	420.983	-8.268	6.042	Q1_open_11_E1_44_71_11_15_0002_0001
-2475.76	151.229	-10.769	3.951	Q1_open_11_E1_44_71_12_15_0001_0001
-2336.16	660.98	-7.329	8.906	Q1_open_11_E1_44_71_12_15_0002_0001
-2385.76	222.977	-8.028	5.794	Q1_open_11_E1_44_71_13_15_0001_0001
-2389.21	72.926	-20.755	1.537	Q1_open_11_E1_44_71_13_15_0002_0001
-2285.7	76.298	-10.961	9.974	Q1_open_11_E1_44_71_14_15_0001_0001
-2399.99	123.325	-16.295	2.047	Q1_open_11_E1_44_71_14_15_0002_0001
-2282.57	249.722	-12.21	6.051	Q1_open_11_E1_44_71_15_15_0001_0001
-2388.05	234.636	-8.168	4.952	Q1_open_11_E1_44_71_15_15_0002_0001
-2334.62	476.53	-1.261	7.581	Q1_open_11_E1_44_71_16_15_0001_0001
-2404.29	125.713	-17.283	5.578	Q1_open_11_E1_44_71_16_15_0002_0001
-2172.78	166.64	-13.811	6.49	Q1_open_11_E1_44_71_17_15_0001_0001
-2396.32	104.905	-9.16	5.338	Q1_open_11_E1_44_71_17_15_0002_0001
-2387.54	168.135	-13.964	5.029	Q1_open_11_E1_44_71_18_15_0001_0001
-2399.47	716.986	-4.045	10.779	Q1_open_11_E1_44_71_18_15_0002_0001
-2370.88	628.027	-10.375	10.493	Q1_open_11_E1_44_71_19_15_0001_0001
-2404.53	115.498	-21.76	4.432	Q1_open_11_E1_44_71_19_15_0002_0001
-2390.09	105.848	-7.05	3.835	Q1_open_11_E1_44_71_1_15_0001_0001
-2371.11	201.663	-8.893	6.142	Q1_open_11_E1_44_71_1_15_0002_0001
-2356.51	201.36	-4.852	6.584	Q1_open_11_E1_44_71_20_15_0001_0001
-2382.52	148.542	-11.177	6.36	Q1_open_11_E1_44_71_20_15_0002_0001
-2387.64	329.52	-9.566	10.177	Q1_open_11_E1_44_71_2_15_0001_0001
-2385.86	175.314	-2.78	5.944	Q1_open_11_E1_44_71_2_15_0002_0001
-2376.54	189.287	-12.482	4.502	Q1_open_11_E1_44_71_3_15_0001_0001
-2373.19	84.276	-9.784	7.369	Q1_open_11_E1_44_71_3_15_0002_0001
-2397.24	152.711	-13.866	2.029	Q1_open_11_E1_44_71_4_15_0001_0001
-2395.52	148.834	-3.119	4.204	Q1_open_11_E1_44_71_4_15_0002_0001
-2323.54	1246.68	-2.631	15.937	Q1_open_11_E1_44_71_5_15_0001_0001
-2453.81	348.453	-12.564	5.381	Q1_open_11_E1_44_71_5_15_0002_0001
-2397.78	134.439	-11.878	3.052	Q1_open_11_E1_44_71_6_15_0001_0001
-2394.83	121.465	-12.469	3.485	Q1_open_11_E1_44_71_6_15_0002_0001
-2374.79	249.357	-7.523	6.259	Q1_open_11_E1_44_71_7_15_0001_0001
-2394.65	193.301	-9.835	5.667	Q1_open_11_E1_44_71_7_15_0002_0001
-2374.72	193.231	-7.517	5.174	Q1_open_11_E1_44_71_8_15_0001_0001
-2409.51	104.68	-21.354	6.575	Q1_open_11_E1_44_71_8_15_0002_0001
-2367.83	190.706	-5.675	5.862	Q1_open_11_E1_44_71_9_15_0001_0001
-2371.47	1140.84	-5.263	16.858	Q1_open_11_E1_44_71_9_15_0002_0001
-2466.12	89.89	-13.168	3.331	Q1_open_17_E1_44_71_10_15_0001_0001
-2464.97	150.423	-8.305	5.933	Q1_open_17_E1_44_71_10_15_0002_0001
-2451.13	62.665	-11.823	4.781	Q1_open_17_E1_44_71_11_15_0001_0001
-2463.2	262.218	-7.498	7.182	Q1_open_17_E1_44_71_11_15_0002_0001
-2465.47	67.209	-19.941	3.943	Q1_open_17_E1_44_71_12_15_0001_0001
-2452.43	76.511	-15.598	1.899	Q1_open_17_E1_44_71_12_15_0002_0001
-2465.41	107.999	-2.798	4.03	Q1_open_17_E1_44_71_13_15_0001_0001
-2458.67	107.409	-4.418	4.383	Q1_open_17_E1_44_71_13_15_0002_0001
-2474.26	156.023	-14.453	5.083	Q1_open_17_E1_44_71_14_15_0001_0001
-2478.2	312.326	-9.454	7.652	Q1_open_17_E1_44_71_14_15_0002_0001
-2462.52	75.98	-15.155	4.17	Q1_open_17_E1_44_71_15_15_0001_0001
-2554.55	172.155	-11.552	5.107	Q1_open_17_E1_44_71_15_15_0002_0001
-2455.9	174.681	-13.406	5.668	Q1_open_17_E1_44_71_16_15_0001_0001
-2465.04	143.232	-5.49	5.522	Q1_open_17_E1_44_71_16_15_0002_0001
-2465.48	185.049	-13.582	4.665	Q1_open_17_E1_44_71_17_15_0001_0001
-2457.67	107.59	-9.729	5.527	Q1_open_17_E1_44_71_17_15_0002_0001
-2438.83	54.908	-9.276	7.533	Q1_open_17_E1_44_71_18_15_0001_0001
-2463.46	123.772	-10.767	2.599	Q1_open_17_E1_44_71_18_15_0002_0001
-2456.54	669.419	-6.963	10.509	Q1_open_17_E1_44_71_19_15_0001_0001
-2460.86	134.004	-12.545	6.257	Q1_open_17_E1_44_71_19_15_0002_0001
-2488.71	95.025	-12.757	2.416	Q1_open_17_E1_44_71_1_15_0001_0001
-2466.02	105.965	-11.385	4.071	Q1_open_17_E1_44_71_1_15_0002_0001
-2454.72	1186.49	-1.393	15.854	Q1_open_17_E1_44_71_20_15_0001_0001
-2459.03	158.458	-10.804	5.439	Q1_open_17_E1_44_71_20_15_0002_0001
-2426.67	48.678	-7.835	3.345	Q1_open_17_E1_44_71_2_15_0001_0001
-2451.22	81.762	-18.478	4.013	Q1_open_17_E1_44_71_2_15_0002_0001
-2473.54	95.871	-16.755	6.779	Q1_open_17_E1_44_71_3_15_0001_0001
-2434.94	100.508	-14.175	8.398	Q1_open_17_E1_44_71_3_15_0002_0001
-2535.31	84.71	-19.274	1.954	Q1_open_17_E1_44_71_4_15_0001_0001
-2441.85	112.285	-4.561	3.893	Q1_open_17_E1_44_71_4_15_0002_0001
-2447.33	148.382	-8.362	4.867	Q1_open_17_E1_44_71_5_15_0001_0001
-2463.39	1284.46	-2.891	13.824	Q1_open_17_E1_44_71_5_15_0002_0001
-2426.17	375.549	-3.652	11.817	Q1_open_17_E1_44_71_6_15_0001_0001
-2465.15	70.091	-13.28	4.911	Q1_open_17_E1_44_71_6_15_0002_0001
-2441.57	130.357	-7.614	4.907	Q1_open_17_E1_44_71_7_15_0001_0001
-2451.3	234.843	-8.299	5.524	Q1_open_17_E1_44_71_7_15_0002_0001
-2557.76	106.694	-12.937	3.688	Q1_open_17_E1_44_71_8_15_0001_0001
-2464.31	227.437	-8.067	8.25	Q1_open_17_E1_44_71_8_15_0002_0001
-2453.58	52.329	-10.279	5.476	Q1_open_17_E1_44_71_9_15_0001_0001
[truncated: 190,001 more rows]
