# Supplementary material for: Allosteric mechanism for KCNE1 modulation of KCNQ1 potassium channel activation
Source: eLife. 2020 Oct 23;9:e57680. doi: 10.7554/eLife.57680 (PMC7584456; doi:10.7554/eLife.57680)
Supplement: Figure 3—figure supplement 4—source data 1. [file elife-57680-fig3-figsupp4-data1.xlsx]

## Sheet: Sheet1
Rosetta fullatom score	Atom pair restraint score	Rosetta ddg binding score	Interface RMSD vs Q1E1 Rosetta model	Fraction same contacts as Q1E1 Rosetta model	Model description
-4279.58	5.04	-66.6	3.658	0.607	q1_ao_9_e1_6_14_0002_96_0022_96_0005_96_0013
-4277.85	7.17	-70.727	3.557	0.595	q1_ao_14_e1_9_22_0002_27_0002_29_0002_0001
-4278.79	5.429	-74.894	3.581	0.595	q1_ao_14_e1_9_22_0002_27_0002_29_0011_0001
-4277.82	5.314	-72.314	3.541	0.595	q1_ao_14_e1_9_22_0002_27_0002_29_0017_0001
-4275.51	6.305	-71.821	3.567	0.595	q1_ao_14_e1_9_22_0002_27_0002_29_0021_0001
-4274.37	6.235	-73.095	3.616	0.595	q1_ao_14_e1_9_22_0002_27_0038_30_0040_0001
-4213.77	7.399	-62.271	3.785	0.595	q1_ao_4_e1_5_91_0002_74_0023_75_0017_0001
-4272.03	5.362	-70.54	3.602	0.595	q1_ao_14_e1_9_22_0002_27_0038_30_0040_24_0010
-4277.66	5.115	-73.405	3.605	0.595	q1_ao_14_e1_9_22_0002_27_0038_30_0040_24_0012
-4279.06	5.332	-71.282	3.534	0.595	q1_ao_14_e1_9_22_0002_27_0002_29_0002_28_0005
-4278.19	6.631	-72.64	3.559	0.595	q1_ao_14_e1_9_22_0002_27_0002_29_0002_28_0006
-4277.24	6.503	-73.439	3.555	0.595	q1_ao_14_e1_9_22_0002_27_0002_29_0002_28_0011
-4282.53	6.699	-73.621	3.551	0.595	q1_ao_14_e1_9_22_0002_27_0002_29_0002_28_0019
-4277.83	6.715	-72.462	3.559	0.595	q1_ao_14_e1_9_22_0002_27_0002_29_0002_28_0031
-4276.77	6.812	-71.595	3.556	0.595	q1_ao_14_e1_9_22_0002_27_0002_29_0002_28_0035
-4274.41	6.848	-71.282	3.556	0.595	q1_ao_14_e1_9_22_0002_27_0002_29_0002_28_0037
-4275.86	6.542	-70.872	3.577	0.595	q1_ao_14_e1_9_22_0002_27_0002_29_0004_28_0038
-4275.5	5.304	-73.886	3.575	0.595	q1_ao_14_e1_9_22_0002_27_0002_29_0011_28_0011
-4276.49	5.392	-70.6	3.547	0.595	q1_ao_14_e1_9_22_0002_27_0002_29_0011_28_0012
-4273.31	5.229	-69.775	3.56	0.595	q1_ao_14_e1_9_22_0002_27_0002_29_0011_28_0021
-4278.74	5.489	-74.469	3.566	0.595	q1_ao_14_e1_9_22_0002_27_0002_29_0011_28_0032
-4278.59	5.686	-75.122	3.582	0.595	q1_ao_14_e1_9_22_0002_27_0002_29_0011_28_0036
-4280.28	5.352	-73.945	3.558	0.595	q1_ao_14_e1_9_22_0002_27_0002_29_0017_28_0007
-4281.8	5.116	-72.995	3.523	0.595	q1_ao_14_e1_9_22_0002_27_0002_29_0017_28_0017
-4278.6	4.926	-73.078	3.581	0.595	q1_ao_14_e1_9_22_0002_27_0002_29_0017_28_0021
-4277.78	5.235	-72.275	3.552	0.595	q1_ao_14_e1_9_22_0002_27_0002_29_0017_28_0022
-4273.57	6.713	-71.287	3.555	0.595	q1_ao_14_e1_9_22_0002_27_0002_29_0018_29_0022
-4272.62	5.449	-71.378	3.559	0.595	q1_ao_14_e1_9_22_0002_27_0002_29_0021_29_0003
-4277.98	5.662	-72.149	3.56	0.595	q1_ao_14_e1_9_22_0002_27_0002_29_0021_29_0015
-4274.61	5.523	-72.654	3.568	0.595	q1_ao_14_e1_9_22_0002_27_0002_29_0021_29_0016
-4277.8	5.194	-71.022	3.54	0.595	q1_ao_14_e1_9_22_0002_27_0002_29_0021_29_0018
-4273.77	5.361	-70.558	3.547	0.595	q1_ao_14_e1_9_22_0002_27_0002_29_0021_29_0031
-4273.13	5.771	-69.54	3.52	0.595	q1_ao_14_e1_9_22_0002_27_0002_29_0021_29_0039
-4274.35	6.593	-71.359	3.547	0.595	q1_ao_14_e1_9_22_0002_27_0002_29_0039_29_0008
-4275.85	6.461	-72.666	3.553	0.595	q1_ao_14_e1_9_22_0002_27_0002_29_0039_29_0009
-4276.87	6.695	-71.721	3.566	0.595	q1_ao_14_e1_9_22_0002_27_0002_29_0039_29_0015
-4274.61	5.548	-71.935	3.561	0.595	q1_ao_14_e1_9_22_0002_27_0002_29_0039_29_0038
-4277.01	6.614	-73.397	3.557	0.595	q1_ao_14_e1_9_22_0002_27_0002_29_0039_29_0039
-4278.99	6.025	-71.004	3.578	0.595	q1_ao_14_e1_9_22_0002_27_0038_30_0002_30_0031
-4275.76	6.289	-68.613	3.561	0.595	q1_ao_14_e1_9_22_0002_27_0038_30_0017_30_0032
-4277.92	5.554	-75.655	3.596	0.595	q1_ao_14_e1_9_22_0002_27_0038_30_0040_30_0011
-4277.61	5.331	-72.871	3.591	0.595	q1_ao_14_e1_9_22_0002_27_0038_30_0040_30_0015
-4282.06	5.315	-73.413	3.552	0.595	q1_ao_14_e1_9_22_0002_27_0038_30_0040_30_0026
-4276.87	5.218	-73.601	3.599	0.595	q1_ao_14_e1_9_22_0002_27_0038_30_0040_30_0033
-4277.43	5.461	-74.7	3.608	0.595	q1_ao_14_e1_9_22_0002_27_0038_30_0040_30_0036
-4236.95	0.949	-59.978	3.697	0.595	q1_ao_19_e1_1_36_0002_44_0025_48_0039_37_0012
-4218.55	7.351	-64.706	3.801	0.595	q1_ao_4_e1_5_91_0002_74_0023_75_0017_80_0011
-4276.97	6.875	-72.258	3.588	0.583	q1_ao_14_e1_9_22_0002_27_0037
-4277.08	6.817	-70.371	3.591	0.583	q1_ao_14_e1_9_22_0002_27_0002_29_0004_0001
-4271.43	6.936	-65.641	3.589	0.583	q1_ao_14_e1_9_22_0002_27_0002_29_0029_0001
-4277.93	6.965	-70.553	3.568	0.583	q1_ao_14_e1_9_22_0002_27_0020_29_0015_0001
-4280.82	6.228	-75.935	3.538	0.583	q1_ao_14_e1_9_22_0002_27_0037_29_0003_0001
-4276.31	6.057	-74.477	3.533	0.583	q1_ao_14_e1_9_22_0002_27_0037_29_0009_0001
-4268.11	6.48	-67.091	3.593	0.583	q1_ao_14_e1_9_22_0002_27_0038_30_0002_0001
-4276.87	6.483	-68.365	3.688	0.583	q1_ao_14_e1_9_22_0002_27_0038_30_0008_0001
-4276.23	6.524	-68.194	3.648	0.583	q1_ao_14_e1_9_22_0002_27_0038_30_0008_24_0002
-4279.23	5.202	-68.108	3.66	0.583	q1_ao_14_e1_9_22_0002_27_0038_30_0008_24_0039
-4276.37	5.357	-74.396	3.618	0.583	q1_ao_14_e1_9_22_0002_27_0038_30_0040_24_0030
-4278.94	5.264	-70.645	3.619	0.583	q1_ao_14_e1_9_22_0002_27_0038_30_0040_24_0036
-4282.19	5.316	-72.283	3.616	0.583	q1_ao_14_e1_9_22_0002_27_0002_29_0011_28_0015
-4278.94	5.827	-72.042	3.631	0.583	q1_ao_14_e1_9_22_0002_27_0002_29_0011_28_0024
-4276.85	6.813	-67.917	3.523	0.583	q1_ao_14_e1_9_22_0002_27_0002_29_0018_29_0005
-4275.54	6.712	-68.315	3.554	0.583	q1_ao_14_e1_9_22_0002_27_0002_29_0018_29_0012
-4275.11	6.862	-67.656	3.549	0.583	q1_ao_14_e1_9_22_0002_27_0002_29_0018_29_0036
-4271.07	6.486	-68.018	3.539	0.583	q1_ao_14_e1_9_22_0002_27_0002_29_0018_29_0040
-4277.55	5.372	-71.357	3.56	0.583	q1_ao_14_e1_9_22_0002_27_0002_29_0029_29_0001
-4272.55	6.685	-68.232	3.526	0.583	q1_ao_14_e1_9_22_0002_27_0002_29_0029_29_0006
-4275.62	5.417	-70.477	3.677	0.583	q1_ao_14_e1_9_22_0002_27_0002_29_0032_29_0028
-4278.02	6.547	-72.565	3.534	0.583	q1_ao_14_e1_9_22_0002_27_0002_29_0039_29_0022
-4273.01	5.296	-69.998	3.541	0.583	q1_ao_14_e1_9_22_0002_27_0002_29_0039_29_0025
-4277.42	5.507	-71.874	3.519	0.583	q1_ao_14_e1_9_22_0002_27_0037_29_0003_29_0001
-4277.29	5.234	-73.055	3.541	0.583	q1_ao_14_e1_9_22_0002_27_0037_29_0003_29_0010
-4283.22	5.409	-75.762	3.538	0.583	q1_ao_14_e1_9_22_0002_27_0037_29_0003_29_0023
-4275.73	5.037	-72.915	3.539	0.583	q1_ao_14_e1_9_22_0002_27_0037_29_0003_29_0039
-4277.43	5.44	-70.935	3.505	0.583	q1_ao_14_e1_9_22_0002_27_0037_29_0003_29_0040
-4282.41	5.327	-76.044	3.544	0.583	q1_ao_14_e1_9_22_0002_27_0037_29_0009_29_0007
-4283.81	5.028	-76.644	3.532	0.583	q1_ao_14_e1_9_22_0002_27_0037_29_0009_29_0022
-4282.37	5.447	-75.858	3.532	0.583	q1_ao_14_e1_9_22_0002_27_0037_29_0009_29_0035
-4280.42	6.501	-73.346	3.579	0.583	q1_ao_14_e1_9_22_0002_27_0037_29_0036_29_0002
-4282.35	6.483	-73.206	3.58	0.583	q1_ao_14_e1_9_22_0002_27_0037_29_0036_29_0006
-4283.41	5.526	-74.372	3.578	0.583	q1_ao_14_e1_9_22_0002_27_0037_29_0036_29_0012
-4282.67	6.353	-74.033	3.611	0.583	q1_ao_14_e1_9_22_0002_27_0037_29_0036_29_0013
-4281.86	6.468	-73.58	3.613	0.583	q1_ao_14_e1_9_22_0002_27_0037_29_0036_29_0018
-4278.51	6.534	-73.351	3.599	0.583	q1_ao_14_e1_9_22_0002_27_0037_29_0036_29_0027
-4280.38	6.341	-72.955	3.607	0.583	q1_ao_14_e1_9_22_0002_27_0037_29_0036_29_0029
-4278.02	6.391	-73.545	3.595	0.583	q1_ao_14_e1_9_22_0002_27_0037_29_0036_29_0040
-4267.53	4.985	-68.1	3.697	0.583	q1_ao_14_e1_9_22_0002_27_0038_30_0002_30_0007
-4269.88	6.669	-67.427	3.576	0.583	q1_ao_14_e1_9_22_0002_27_0038_30_0002_30_0029
-4272.27	6.513	-69.457	3.576	0.583	q1_ao_14_e1_9_22_0002_27_0038_30_0017_30_0027
-4269.44	6.732	-66.554	3.587	0.583	q1_ao_14_e1_9_22_0002_27_0038_30_0034_30_0011
-4275.11	5.795	-70.815	3.626	0.583	q1_ao_14_e1_9_22_0002_27_0038_30_0034_30_0029
-4271.01	6.606	-69.781	3.584	0.583	q1_ao_14_e1_9_22_0002_27_0038_30_0034_30_0030
-4279.59	5.295	-72.76	3.612	0.583	q1_ao_14_e1_9_22_0002_27_0038_30_0040_30_0021
-4282.66	5.249	-73.235	3.604	0.583	q1_ao_14_e1_9_22_0002_27_0038_30_0040_30_0025
-4227.34	4.61	-61.049	3.868	0.583	q1_ao_4_e1_10_58_0001_71_0024_72_0030_70_0025
-4241.91	9.116	-73.687	3.714	0.583	q1_ao_4_e1_4_14_0002_73_0018_74_0010_77_0029
-4212.03	7.443	-59.759	3.832	0.583	q1_ao_4_e1_5_91_0002_74_0023_75_0017_80_0024
-4241.8	7.89	-41.015	3.726	0.571	q1_ao_20_e1_5_91_0001_54_0040
-4214.54	7.923	-59.104	3.813	0.571	q1_ao_4_e1_5_91_0002_74_0023
-4261.2	3.842	-67.945	3.593	0.571	q1_ao_14_e1_1_8_0002_20_0023_24_0034_0001
-4274.16	6.877	-68.593	3.534	0.571	q1_ao_14_e1_9_22_0002_27_0002_29_0018_0001
-4274.94	6.734	-70.233	3.538	0.571	q1_ao_14_e1_9_22_0002_27_0002_29_0039_0001
-4274.98	7.023	-70.217	3.623	0.571	q1_ao_14_e1_9_22_0002_27_0037_29_0036_0001
-4273.27	7.116	-68.798	3.593	0.571	q1_ao_14_e1_9_22_0002_27_0038_30_0017_0001
-4261.18	4.082	-67.419	3.593	0.571	q1_ao_14_e1_1_8_0002_20_0023_24_0034_13_0004
-4262.23	4.024	-70.429	3.596	0.571	q1_ao_14_e1_1_8_0002_20_0023_24_0034_13_0007
-4279.45	6.3	-70.443	3.722	0.571	q1_ao_14_e1_9_22_0002_27_0038_30_0008_24_0005
-4277.26	5.455	-67.391	3.667	0.571	q1_ao_14_e1_9_22_0002_27_0038_30_0008_24_0013
-4281.19	5.992	-72.318	3.703	0.571	q1_ao_14_e1_9_22_0002_27_0038_30_0008_24_0024
-4278.87	5.349	-69.369	3.674	0.571	q1_ao_14_e1_9_22_0002_27_0038_30_0008_24_0027
-4279.66	5.253	-71.102	3.71	0.571	q1_ao_14_e1_9_22_0002_27_0038_30_0008_24_0040
-4275.89	6.306	-72.106	3.592	0.571	q1_ao_14_e1_9_22_0002_27_0038_30_0034_24_0009
-4275.93	6.391	-72.829	3.58	0.571	q1_ao_14_e1_9_22_0002_27_0038_30_0034_24_0025
-4276.4	5.123	-68.431	3.722	0.571	q1_ao_14_e1_9_22_0002_27_0038_30_0040_24_0007
-4274.67	6.964	-67.954	3.526	0.571	q1_ao_14_e1_9_22_0002_27_0002_29_0018_29_0034
-4269.04	5.745	-66.305	3.705	0.571	q1_ao_14_e1_9_22_0002_27_0002_29_0032_29_0021
-4280.69	6.457	-70.599	3.662	0.571	q1_ao_14_e1_9_22_0002_27_0020_29_0015_29_0030
-4280.47	5.596	-75.567	3.55	0.571	q1_ao_14_e1_9_22_0002_27_0037_29_0003_29_0012
-4265.77	5.542	-67.616	3.509	0.571	q1_ao_14_e1_9_22_0002_27_0037_29_0009_29_0029
-4279.94	5.066	-75.188	3.548	0.571	q1_ao_14_e1_9_22_0002_27_0037_29_0009_29_0032
-4277.44	6.662	-71.782	3.627	0.571	q1_ao_14_e1_9_22_0002_27_0037_29_0036_29_0009
-4283.83	5.342	-72.657	3.706	0.571	q1_ao_14_e1_9_22_0002_27_0038_30_0008_30_0001
-4281.49	5.663	-72.632	3.742	0.571	q1_ao_14_e1_9_22_0002_27_0038_30_0008_30_0009
-4278.66	5.073	-70.65	3.709	0.571	q1_ao_14_e1_9_22_0002_27_0038_30_0008_30_0015
-4276.39	5.332	-69.113	3.726	0.571	q1_ao_14_e1_9_22_0002_27_0038_30_0008_30_0027
-4277.95	6.028	-70.263	3.709	0.571	q1_ao_14_e1_9_22_0002_27_0038_30_0008_30_0030
-4269.79	7.049	-67.622	3.58	0.571	q1_ao_14_e1_9_22_0002_27_0038_30_0017_30_0035
-4279.23	6.33	-72.7	3.564	0.571	q1_ao_14_e1_9_22_0002_27_0038_30_0034_30_0022
-4251.91	0.926	-61.029	3.714	0.571	q1_ao_19_e1_1_36_0002_44_0025_48_0039_37_0022
-4278.6	5.57	-71.045	3.926	0.571	q1_ao_3_e1_7_92_0002_70_0023_71_0016_68_0021
-4291.67	5.959	-78.971	3.746	0.571	q1_ao_3_e1_7_92_0002_70_0023_71_0021_68_0013
-4282.16	6.433	-78.21	3.752	0.571	q1_ao_3_e1_7_92_0002_70_0023_71_0021_68_0027
-4290.28	6.417	-78.26	3.747	0.571	q1_ao_3_e1_7_92_0002_70_0023_71_0021_68_0034
-4230.56	5.711	-58.687	3.891	0.571	q1_ao_4_e1_10_58_0001_71_0024_72_0030_70_0037
-4242.61	8.899	-65.049	3.761	0.571	q1_ao_4_e1_4_14_0002_73_0030_74_0001_77_0016
-4217.32	8.244	-53.274	3.708	0.571	q1_ao_4_e1_5_91_0002_74_0023_75_0017_80_0021
-4220.36	7.95	-58.972	3.875	0.571	q1_ao_4_e1_5_91_0002_74_0023_75_0021_80_0018
-4219.71	7.83	-58.529	3.885	0.571	q1_ao_4_e1_5_91_0002_74_0023_75_0021_80_0026
-4219.94	7.719	-58.551	3.848	0.571	q1_ao_4_e1_5_91_0002_74_0023_75_0032_80_0019
-4216.81	7.34	-60.338	3.828	0.571	q1_ao_4_e1_5_91_0002_74_0023_75_0039_81_0002
-4255.91	5.304	-48.387	3.851	0.56	q1_ao_9_e1_5_78_0002_96_0015
-4256.73	5.229	-49.53	3.85	0.56	q1_ao_9_e1_5_78_0002_96_0034
-4255.73	3.017	-65.446	3.482	0.56	q1_ao_14_e1_1_8_0002_20_0011_23_0004_0001
-4266.52	5.706	-62.705	3.619	0.56	q1_ao_14_e1_9_22_0002_27_0002_29_0032_0001
-4273.8	6.681	-70.917	3.593	0.56	q1_ao_14_e1_9_22_0002_27_0038_30_0034_0001
-4289.53	6.244	-75.971	3.745	0.56	q1_ao_3_e1_7_92_0002_70_0023_71_0021_0001
-4216.71	7.748	-58.922	3.83	0.56	q1_ao_4_e1_5_91_0002_74_0023_75_0008_0001
-4227.6	7.62	-61.56	3.843	0.56	q1_ao_4_e1_5_91_0002_74_0023_75_0032_0001
-4220.03	7.652	-59.136	3.831	0.56	q1_ao_4_e1_5_91_0002_74_0023_75_0033_0001
-4259.06	4.48	-54.988	3.907	0.56	q1_ao_9_e1_5_78_0002_96_0015_96_0038_0001
-4266.15	4.534	-55.461	3.693	0.56	q1_ao_9_e1_6_14_0002_96_0022_96_0005_0001
-4278.99	7.619	-68.434	3.798	0.56	q1_ao_9_e1_6_14_0002_96_0022_96_0014_0001
-4276.4	7.926	-68.444	3.807	0.56	q1_ao_9_e1_6_14_0002_96_0030_96_0033_0001
-4254.46	3.865	-65.879	3.457	0.56	q1_ao_14_e1_1_8_0002_20_0011_23_0009_10_0035
-4262.18	3.861	-68.716	3.586	0.56	q1_ao_14_e1_1_8_0002_20_0023_24_0034_13_0005
-4261.04	4.017	-69.338	3.626	0.56	q1_ao_14_e1_1_8_0002_20_0023_24_0034_13_0011
-4259.69	3.98	-67.889	3.63	0.56	q1_ao_14_e1_1_8_0002_20_0023_24_0034_13_0013
-4259.15	4.063	-68.198	3.623	0.56	q1_ao_14_e1_1_8_0002_20_0023_24_0034_13_0024
-4260.78	4.142	-68.556	3.609	0.56	q1_ao_14_e1_1_8_0002_20_0023_24_0034_13_0026
-4261.7	4.092	-69.579	3.599	0.56	q1_ao_14_e1_1_8_0002_20_0023_24_0034_13_0032
-4259.75	4.104	-67.967	3.56	0.56	q1_ao_14_e1_1_8_0002_20_0023_24_0034_13_0035
-4260.24	3.962	-67.137	3.601	0.56	q1_ao_14_e1_1_8_0002_20_0023_24_0034_13_0036
-4211.27	3.024	-55.645	3.517	0.56	q1_ao_10_e1_1_34_0001_1_0025_1_0003_1_0023
-4281.69	5.255	-73.207	3.552	0.56	q1_ao_14_e1_9_22_0002_27_0038_30_0034_24_0015
-4275.8	6.441	-72.318	3.596	0.56	q1_ao_14_e1_9_22_0002_27_0038_30_0034_24_0037
-4271.37	5.545	-66.206	3.575	0.56	q1_ao_14_e1_9_22_0002_27_0002_29_0029_29_0002
-4269.18	5.488	-63.851	3.641	0.56	q1_ao_14_e1_9_22_0002_27_0002_29_0032_29_0002
-4266.4	5.492	-63.333	3.639	0.56	q1_ao_14_e1_9_22_0002_27_0002_29_0032_29_0010
-4264.27	5.577	-62.34	3.656	0.56	q1_ao_14_e1_9_22_0002_27_0002_29_0032_29_0017
-4271.29	5.158	-65.283	3.68	0.56	q1_ao_14_e1_9_22_0002_27_0020_29_0015_29_0012
-4275.49	5.567	-67.402	3.737	0.56	q1_ao_14_e1_9_22_0002_27_0038_30_0008_30_0002
-4269.8	6.783	-67.111	3.568	0.56	q1_ao_14_e1_9_22_0002_27_0038_30_0017_30_0019
-4268.27	5.112	-67	3.672	0.56	q1_ao_15_e1_3_69_0002_29_0030_32_0033_31_0020
-4204.25	4.034	-42.389	3.32	0.56	q1_ao_16_e1_4_41_0002_33_0033_36_0032_33_0021
-4244.31	1.301	-61.747	3.809	0.56	q1_ao_19_e1_1_36_0002_44_0025_48_0039_37_0002
-4249.83	1.346	-61.527	3.819	0.56	q1_ao_19_e1_1_36_0002_44_0025_48_0039_37_0036
-4260.77	7.338	-56.645	3.73	0.56	q1_ao_20_e1_5_91_0001_54_0023_57_0010_41_0005
-4292.35	6.166	-78.502	3.774	0.56	q1_ao_3_e1_7_92_0002_70_0023_71_0021_68_0010
-4288.99	5.795	-79.583	3.726	0.56	q1_ao_3_e1_7_92_0002_70_0023_71_0021_68_0031
-4242.89	14.315	-66.042	3.753	0.56	q1_ao_4_e1_4_14_0002_73_0018_74_0010_77_0027
-4234.36	14.368	-68.122	3.796	0.56	q1_ao_4_e1_4_14_0002_73_0018_74_0010_77_0030
-4241.14	14.615	-68.245	3.753	0.56	q1_ao_4_e1_4_14_0002_73_0018_74_0010_77_0034
-4232.94	14.208	-66.054	3.76	0.56	q1_ao_4_e1_4_14_0002_73_0018_74_0010_77_0037
-4231.75	8.196	-62.25	3.653	0.56	q1_ao_4_e1_4_14_0002_73_0030_74_0001_77_0004
-4244.54	9.18	-64.829	3.751	0.56	q1_ao_4_e1_4_14_0002_73_0030_74_0001_77_0006
-4242.4	8.949	-65.95	3.738	0.56	q1_ao_4_e1_4_14_0002_73_0030_74_0001_77_0012
-4243.82	6.667	-75.06	3.858	0.56	q1_ao_4_e1_4_14_0002_73_0030_74_0026_78_0017
-4237.94	4.837	-71.431	3.843	0.56	q1_ao_4_e1_4_14_0002_73_0040_74_0040_78_0016
-4218.97	7.533	-58.671	3.855	0.56	q1_ao_4_e1_5_91_0002_74_0023_75_0008_80_0005
-4217.76	7.485	-61.321	3.853	0.56	q1_ao_4_e1_5_91_0002_74_0023_75_0017_80_0035
-4219.2	7.881	-54.432	3.883	0.56	q1_ao_4_e1_5_91_0002_74_0023_75_0021_80_0019
-4219	7.398	-56.985	3.866	0.56	q1_ao_4_e1_5_91_0002_74_0023_75_0028_80_0033
-4220.27	7.478	-58.291	3.828	0.56	q1_ao_4_e1_5_91_0002_74_0023_75_0033_81_0004
-4215.37	7.729	-57.888	3.808	0.56	q1_ao_4_e1_5_91_0002_74_0023_75_0033_81_0027
-4266.8	4.265	-56.431	3.672	0.56	q1_ao_9_e1_6_14_0002_96_0022_96_0005_96_0025
-4277.52	8.406	-65.949	3.685	0.56	q1_ao_9_e1_6_14_0002_96_0022_96_0022_96_0030
-4268.6	9.32	-60.082	3.681	0.56	q1_ao_9_e1_6_14_0002_96_0022_96_0026_96_0023
-4283.71	7.114	-69.363	3.758	0.56	q1_ao_9_e1_6_14_0002_96_0022_96_0027_96_0027
-4281.93	7.352	-69.055	3.76	0.56	q1_ao_9_e1_6_14_0002_96_0022_96_0027_96_0028
-4280.05	7.642	-70.132	3.822	0.56	q1_ao_9_e1_6_14_0002_96_0022_96_0027_96_0030
-4278.75	6.309	-69.34	3.725	0.56	q1_ao_9_e1_6_14_0002_96_0022_96_0027_96_0031
-4281.24	7.719	-71.113	3.759	0.56	q1_ao_9_e1_6_14_0002_96_0022_96_0032_96_0040
-4282.64	7.895	-69.458	3.806	0.56	q1_ao_9_e1_6_14_0002_96_0030_96_0033_98_0005
-4283.26	7.881	-69.925	3.806	0.56	q1_ao_9_e1_6_14_0002_96_0030_96_0033_98_0007
-4280.19	7.664	-69.677	3.791	0.56	q1_ao_9_e1_6_14_0002_96_0030_96_0033_98_0009
-4280.85	7.614	-70.715	3.807	0.56	q1_ao_9_e1_6_14_0002_96_0030_96_0033_98_0015
-4276.38	7.72	-67.997	3.794	0.56	q1_ao_9_e1_6_14_0002_96_0030_96_0033_98_0019
-4283.22	7.657	-69.877	3.826	0.56	q1_ao_9_e1_6_14_0002_96_0030_96_0033_98_0021
-4279.67	7.96	-68.734	3.838	0.56	q1_ao_9_e1_6_14_0002_96_0030_96_0033_98_0023
-4278.46	7.142	-69.502	3.809	0.56	q1_ao_9_e1_6_14_0002_96_0030_96_0033_98_0034
-4279.95	8.661	-66.726	3.745	0.56	q1_ao_9_e1_6_14_0002_96_0040_96_0027_98_0013
-4255.8	3.833	-65.225	3.468	0.56	q1_ao_14_e1_1_8_0002_20_0004_23_0016_9_0021
-4218.28	1.046	-53.818	3.667	0.548	q1_ao_19_e1_1_36_0002_44_0025
-4252.76	7.413	-49.126	3.742	0.548	q1_ao_20_e1_5_91_0001_54_0023
-4237.27	25.263	-55.809	3.804	0.548	q1_ao_6_e1_10_68_0001_81_0036
-4256.6	3.325	-67.473	3.508	0.548	q1_ao_14_e1_1_8_0002_20_0011_23_0005_0001
-4256.65	3.566	-66.483	3.563	0.548	q1_ao_14_e1_1_8_0002_20_0011_23_0021_0001
-4253.25	3.436	-65.607	3.588	0.548	q1_ao_14_e1_1_8_0002_20_0011_23_0037_0001
-4253.54	3.306	-66.98	3.546	0.548	q1_ao_14_e1_1_8_0002_20_0011_23_0040_0001
-4238.42	0.799	-57.748	3.72	0.548	q1_ao_19_e1_1_36_0002_44_0025_48_0039_0001
-4231.26	14.294	-65.232	3.754	0.548	q1_ao_4_e1_4_14_0002_73_0018_74_0010_0001
-4243.65	5.86	-73.476	3.856	0.548	q1_ao_4_e1_4_14_0002_73_0030_74_0026_0001
-4214.52	7.808	-57.025	3.82	0.548	q1_ao_4_e1_5_91_0002_74_0023_75_0016_0001
-4218.16	7.885	-57.967	3.891	0.548	q1_ao_4_e1_5_91_0002_74_0023_75_0021_0001
-4215.12	7.98	-56.091	3.831	0.548	q1_ao_4_e1_5_91_0002_74_0023_75_0028_0001
-4217.71	7.825	-58.102	3.831	0.548	q1_ao_4_e1_5_91_0002_74_0023_75_0034_0001
-4217.19	8.056	-59.757	3.825	0.548	q1_ao_4_e1_5_91_0002_74_0023_75_0039_0001
-4278.28	8.055	-68.405	3.749	0.548	q1_ao_9_e1_6_14_0002_96_0022_96_0027_0001
-4277.66	7.23	-68.999	3.863	0.548	q1_ao_9_e1_6_14_0002_96_0027_96_0006_0001
-4279.26	7.221	-68.005	3.838	0.548	q1_ao_9_e1_6_14_0002_96_0027_96_0026_0001
-4258.27	3.45	-67.516	3.51	0.548	q1_ao_14_e1_1_8_0002_20_0011_23_0006_10_0006
-4259.17	3.798	-69.035	3.483	0.548	q1_ao_14_e1_1_8_0002_20_0011_23_0009_10_0009
-4257.52	3.96	-68.448	3.457	0.548	q1_ao_14_e1_1_8_0002_20_0011_23_0009_10_0023
-4257.38	3.79	-67.528	3.467	0.548	q1_ao_14_e1_1_8_0002_20_0011_23_0009_10_0026
-4254.72	3.667	-70	3.477	0.548	q1_ao_14_e1_1_8_0002_20_0011_23_0009_10_0027
-4256.48	4.072	-66.7	3.451	0.548	q1_ao_14_e1_1_8_0002_20_0011_23_0009_10_0028
-4259.02	3.876	-66.987	3.475	0.548	q1_ao_14_e1_1_8_0002_20_0011_23_0009_10_0037
-4256.06	3.397	-66.093	3.511	0.548	q1_ao_14_e1_1_8_0002_20_0011_23_0018_10_0003
-4258.1	3.395	-66.388	3.494	0.548	q1_ao_14_e1_1_8_0002_20_0011_23_0018_10_0012
-4259.11	3.485	-67.31	3.453	0.548	q1_ao_14_e1_1_8_0002_20_0011_23_0018_10_0037
-4258.75	3.466	-67.166	3.547	0.548	q1_ao_14_e1_1_8_0002_20_0011_23_0021_10_0008
-4257.16	3.587	-66.9	3.541	0.548	q1_ao_14_e1_1_8_0002_20_0011_23_0021_10_0034
-4254.97	3.422	-65.837	3.57	0.548	q1_ao_14_e1_1_8_0002_20_0011_23_0021_10_0039
-4255.37	3.442	-67.254	3.518	0.548	q1_ao_14_e1_1_8_0002_20_0011_23_0022_10_0001
-4253.24	3.256	-68.236	3.554	0.548	q1_ao_14_e1_1_8_0002_20_0011_23_0022_10_0008
-4252.52	3.428	-66.655	3.542	0.548	q1_ao_14_e1_1_8_0002_20_0011_23_0022_10_0010
-4253.45	3.561	-65.241	3.568	0.548	q1_ao_14_e1_1_8_0002_20_0011_23_0022_10_0016
-4253.12	3.366	-66.708	3.551	0.548	q1_ao_14_e1_1_8_0002_20_0011_23_0022_10_0019
-4253.82	3.468	-67.384	3.518	0.548	q1_ao_14_e1_1_8_0002_20_0011_23_0032_10_0034
-4259.58	3.445	-66.538	3.536	0.548	q1_ao_14_e1_1_8_0002_20_0011_23_0037_10_0010
-4254.97	3.595	-66.244	3.588	0.548	q1_ao_14_e1_1_8_0002_20_0011_23_0037_10_0012
-4255.19	3.509	-65.558	3.559	0.548	q1_ao_14_e1_1_8_0002_20_0011_23_0037_10_0014
-4255.93	3.548	-67.658	3.592	0.548	q1_ao_14_e1_1_8_0002_20_0011_23_0037_10_0019
-4256.85	3.55	-65.771	3.544	0.548	q1_ao_14_e1_1_8_0002_20_0011_23_0037_10_0031
-4256.66	3.556	-66.807	3.584	0.548	q1_ao_14_e1_1_8_0002_20_0011_23_0037_10_0032
-4256.07	3.608	-67.047	3.587	0.548	q1_ao_14_e1_1_8_0002_20_0011_23_0037_10_0036
-4256.53	3.385	-67.256	3.537	0.548	q1_ao_14_e1_1_8_0002_20_0011_23_0040_10_0009
-4257.2	3.586	-56.338	3.553	0.548	q1_ao_14_e1_1_8_0002_20_0014_24_0033_11_0009
-4256.26	3.328	-65.738	3.628	0.548	q1_ao_14_e1_1_8_0002_20_0038_24_0003_13_0033
-4207.74	3.986	-45.202	3.419	0.548	q1_ao_16_e1_4_41_0002_33_0033_36_0032_33_0008
-4206.12	3.601	-44.311	3.229	0.548	q1_ao_16_e1_4_41_0002_33_0033_36_0032_33_0014
-4205.65	3.259	-47.173	3.361	0.548	q1_ao_16_e1_4_41_0002_33_0033_36_0032_33_0027
-4204.48	3.852	-40.158	3.285	0.548	q1_ao_16_e1_4_41_0002_33_0033_36_0032_33_0039
-4248.66	1.241	-60.597	3.779	0.548	q1_ao_19_e1_1_36_0002_44_0025_48_0039_37_0005
-4250.72	1.244	-60.606	3.746	0.548	q1_ao_19_e1_1_36_0002_44_0025_48_0039_37_0019
-4237.08	5.483	-50.17	3.449	0.548	q1_ao_19_e1_8_74_0001_47_0035_53_0032_39_0003
-4241.67	5.251	-51.513	3.476	0.548	q1_ao_19_e1_8_74_0001_47_0035_53_0032_39_0010
-4234.07	5.853	-49.583	3.458	0.548	q1_ao_19_e1_8_74_0001_47_0035_53_0032_39_0030
-4262.54	4.124	-50.899	3.445	0.548	q1_ao_20_e1_9_50_0002_58_0015_61_0022_50_0040
-4282.46	5.171	-65.947	3.687	0.548	q1_ao_2_e1_8_70_0002_64_0031_66_0027_53_0035
-4237.69	5.523	-62.811	4.021	0.548	q1_ao_4_e1_10_58_0001_71_0024_72_0030_70_0030
-4232.67	4.973	-58.743	3.744	0.548	q1_ao_4_e1_10_58_0001_71_0026_72_0014_71_0017
-4233.25	6.319	-70.114	3.784	0.548	q1_ao_4_e1_4_14_0002_73_0013_74_0032_75_0015
-4238	7.109	-76.534	3.963	0.548	q1_ao_4_e1_4_14_0002_73_0013_74_0033_75_0006
-4238.47	4.773	-71.101	3.849	0.548	q1_ao_4_e1_4_14_0002_73_0016_74_0010_76_0002
-4232.09	13.485	-65.834	3.748	0.548	q1_ao_4_e1_4_14_0002_73_0018_74_0010_77_0019
-4235.97	5.702	-71.776	3.894	0.548	q1_ao_4_e1_4_14_0002_73_0030_74_0026_78_0028
-4244.19	6.551	-74.005	3.865	0.548	q1_ao_4_e1_4_14_0002_73_0030_74_0026_78_0033
-4230.83	6.091	-60.401	3.704	0.548	q1_ao_4_e1_5_91_0002_74_0010_75_0038_80_0009
-4226.49	8.338	-57.911	3.903	0.548	q1_ao_4_e1_5_91_0002_74_0023_75_0008_80_0014
-4221.61	7.544	-53.914	3.887	0.548	q1_ao_4_e1_5_91_0002_74_0023_75_0016_80_0037
-4227.03	8.075	-57.203	3.831	0.548	q1_ao_4_e1_5_91_0002_74_0023_75_0028_80_0017
-4230.41	7.385	-58.651	3.703	0.548	q1_ao_4_e1_5_91_0002_74_0023_75_0032_80_0012
-4221.71	7.597	-59.565	3.839	0.548	q1_ao_4_e1_5_91_0002_74_0023_75_0032_80_0033
-4217.37	7.585	-58.305	3.874	0.548	q1_ao_4_e1_5_91_0002_74_0023_75_0032_80_0039
-4221.18	7.217	-57.445	3.961	0.548	q1_ao_4_e1_5_91_0002_74_0023_75_0033_81_0001
-4224.91	7.607	-54.97	3.858	0.548	q1_ao_4_e1_5_91_0002_74_0023_75_0033_81_0028
-4221.82	7.678	-59.209	3.849	0.548	q1_ao_4_e1_5_91_0002_74_0023_75_0033_81_0036
-4226.91	7.609	-58.176	3.82	0.548	q1_ao_4_e1_5_91_0002_74_0023_75_0034_81_0024
-4223.03	7.482	-59.073	3.882	0.548	q1_ao_4_e1_5_91_0002_74_0023_75_0034_81_0035
-4219.27	7.474	-60.104	3.829	0.548	q1_ao_4_e1_5_91_0002_74_0023_75_0039_81_0003
-4217.35	7.342	-59.777	3.822	0.548	q1_ao_4_e1_5_91_0002_74_0023_75_0039_81_0008
-4216.9	8.112	-57.894	3.833	0.548	q1_ao_4_e1_5_91_0002_74_0023_75_0039_81_0017
-4269.77	7.301	-61.148	3.869	0.548	q1_ao_9_e1_6_14_0002_96_0004_96_0002_95_0011
-4279.41	7.218	-69.77	3.83	0.548	q1_ao_9_e1_6_14_0002_96_0004_96_0002_95_0031
-4284.27	8.201	-68.255	3.844	0.548	q1_ao_9_e1_6_14_0002_96_0004_96_0017_95_0019
-4281.96	7.866	-69.145	3.832	0.548	q1_ao_9_e1_6_14_0002_96_0004_96_0022_96_0033
-4277.01	5.766	-70.049	3.806	0.548	q1_ao_9_e1_6_14_0002_96_0022_96_0005_96_0002
-4274.62	4.788	-66.197	3.735	0.548	q1_ao_9_e1_6_14_0002_96_0022_96_0005_96_0023
-4286.05	6.921	-72.632	3.819	0.548	q1_ao_9_e1_6_14_0002_96_0022_96_0009_96_0005
-4267.62	13.151	-59.657	3.876	0.548	q1_ao_9_e1_6_14_0002_96_0022_96_0012_96_0008
-4286.14	7.471	-72.636	3.779	0.548	q1_ao_9_e1_6_14_0002_96_0022_96_0012_96_0039
-4284.31	5.021	-71.882	3.832	0.548	q1_ao_9_e1_6_14_0002_96_0022_96_0014_96_0001
-4281.82	8.01	-69.363	3.808	0.548	q1_ao_9_e1_6_14_0002_96_0022_96_0014_96_0009
-4285.15	5.256	-70.522	3.784	0.548	q1_ao_9_e1_6_14_0002_96_0022_96_0014_96_0016
-4285.14	6.706	-69.804	3.781	0.548	q1_ao_9_e1_6_14_0002_96_0022_96_0014_96_0027
-4284.13	7.254	-69.812	3.802	0.548	q1_ao_9_e1_6_14_0002_96_0022_96_0014_96_0033
-4279.17	7.931	-66.671	3.78	0.548	q1_ao_9_e1_6_14_0002_96_0022_96_0017_96_0013
-4283.66	7.77	-71.445	3.777	0.548	q1_ao_9_e1_6_14_0002_96_0022_96_0027_96_0016
-4277.48	7.606	-70.025	3.791	0.548	q1_ao_9_e1_6_14_0002_96_0022_96_0032_96_0021
-4273.56	8.099	-65.18	3.823	0.548	q1_ao_9_e1_6_14_0002_96_0022_96_0032_96_0039
-4277.94	7.332	-69.068	3.804	0.548	q1_ao_9_e1_6_14_0002_96_0030_96_0033_98_0016
-4279.74	8.573	-66.669	3.78	0.548	q1_ao_9_e1_6_14_0002_96_0040_96_0027_98_0027
-4257.11	3.043	-66.666	3.48	0.548	q1_ao_14_e1_1_8_0002_20_0011_23_0004_9_0011
-4256	3.564	-65.405	3.501	0.548	q1_ao_14_e1_1_8_0002_20_0011_23_0004_9_0025
-4260.28	3.354	-69.706	3.504	0.548	q1_ao_14_e1_1_8_0002_20_0011_23_0004_9_0026
-4258.02	3.145	-66.422	3.482	0.548	q1_ao_14_e1_1_8_0002_20_0011_23_0004_9_0029
-4253.46	3.392	-67.521	3.504	0.548	q1_ao_14_e1_1_8_0002_20_0011_23_0004_9_0031
-4258.16	3.341	-67.314	3.478	0.548	q1_ao_14_e1_1_8_0002_20_0011_23_0004_9_0036
-4253.67	3.223	-66.789	3.544	0.548	q1_ao_14_e1_1_8_0002_20_0011_23_0005_9_0001
-4258.3	3.348	-66.981	3.505	0.548	q1_ao_14_e1_1_8_0002_20_0011_23_0005_9_0020
-4256.85	3.299	-67.685	3.495	0.548	q1_ao_14_e1_1_8_0002_20_0011_23_0005_9_0021
-4252.99	3.542	-66.682	3.54	0.548	q1_ao_14_e1_1_8_0002_20_0011_23_0005_9_0034
-4216.8	2.883	-53.939	3.509	0.536	q1_ao_10_e1_1_34_0001_1_0025
-4250.99	3.425	-62.725	3.51	0.536	q1_ao_14_e1_1_8_0002_20_0011
-4264.74	7.461	-62.737	3.57	0.536	q1_ao_14_e1_9_22_0002_27_0038
-4215.71	3.144	-53.129	3.456	0.536	q1_ao_10_e1_1_34_0001_1_0025_1_0002_0001
-4214.37	2.788	-56.906	3.541	0.536	q1_ao_10_e1_1_34_0001_1_0025_1_0003_0001
-4213.6	3.002	-53.349	3.508	0.536	q1_ao_10_e1_1_34_0001_1_0025_1_0024_0001
-4258.03	3.514	-66.477	3.52	0.536	q1_ao_14_e1_1_8_0002_20_0011_23_0006_0001
-4249.95	3.947	-61.088	3.47	0.536	q1_ao_14_e1_1_8_0002_20_0011_23_0009_0001
-4252.65	3.537	-65.701	3.544	0.536	q1_ao_14_e1_1_8_0002_20_0011_23_0022_0001
-4256.16	3.567	-66.784	3.575	0.536	q1_ao_14_e1_1_8_0002_20_0011_23_0025_0001
-4251.75	3.903	-49.37	3.548	0.536	q1_ao_14_e1_1_8_0002_20_0014_24_0033_0001
-4254.11	7.465	-50.207	3.81	0.536	q1_ao_20_e1_5_91_0001_54_0023_57_0010_0001
-4228.43	4.949	-57.747	3.749	0.536	q1_ao_4_e1_10_58_0001_71_0026_72_0014_0001
-4225.88	4.811	-54.048	3.786	0.536	q1_ao_4_e1_10_58_0001_71_0026_72_0020_0001
-4230.51	6.069	-64.996	3.841	0.536	q1_ao_4_e1_5_91_0002_74_0001_75_0010_0001
-4213.46	8.064	-45.062	3.849	0.536	q1_ao_4_e1_5_91_0002_74_0010_75_0004_0001
-4228.44	6.63	-57.117	3.741	0.536	q1_ao_4_e1_5_91_0002_74_0010_75_0038_0001
-4260.6	4.405	-50.783	3.863	0.536	q1_ao_9_e1_5_78_0002_96_0015_96_0020_0001
-4258.58	3.963	-52.905	3.875	0.536	q1_ao_9_e1_5_78_0002_96_0015_96_0027_0001
-4275.66	7.548	-66.689	3.811	0.536	q1_ao_9_e1_6_14_0002_96_0027_96_0016_0001
-4286.66	7.028	-73.955	3.835	0.536	q1_ao_9_e1_6_14_0002_96_0027_96_0023_0001
-4259.27	3.462	-66.326	3.505	0.536	q1_ao_14_e1_1_8_0002_20_0011_23_0006_10_0009
-4257.82	3.465	-64.903	3.517	0.536	q1_ao_14_e1_1_8_0002_20_0011_23_0006_10_0016
-4257.21	3.472	-66.067	3.508	0.536	q1_ao_14_e1_1_8_0002_20_0011_23_0006_10_0024
-4256.38	3.37	-66.478	3.518	0.536	q1_ao_14_e1_1_8_0002_20_0011_23_0006_10_0026
-4255.89	3.352	-66.769	3.518	0.536	q1_ao_14_e1_1_8_0002_20_0011_23_0006_10_0034
-4257.22	3.362	-67.525	3.503	0.536	q1_ao_14_e1_1_8_0002_20_0011_23_0018_10_0002
-4256.15	3.402	-65.194	3.513	0.536	q1_ao_14_e1_1_8_0002_20_0011_23_0018_10_0021
-4256.66	3.38	-66.977	3.506	0.536	q1_ao_14_e1_1_8_0002_20_0011_23_0018_10_0028
-4254.54	3.424	-64.994	3.545	0.536	q1_ao_14_e1_1_8_0002_20_0011_23_0018_10_0038
-4247.66	3.127	-63.419	3.465	0.536	q1_ao_14_e1_1_8_0002_20_0011_23_0018_10_0040
-4256.3	3.393	-66.143	3.551	0.536	q1_ao_14_e1_1_8_0002_20_0011_23_0021_10_0004
-4258.58	3.482	-67.009	3.542	0.536	q1_ao_14_e1_1_8_0002_20_0011_23_0021_10_0005
-4258.65	3.569	-66.182	3.538	0.536	q1_ao_14_e1_1_8_0002_20_0011_23_0021_10_0017
-4257.44	3.447	-65.706	3.549	0.536	q1_ao_14_e1_1_8_0002_20_0011_23_0021_10_0026
-4255.49	3.453	-66.429	3.545	0.536	q1_ao_14_e1_1_8_0002_20_0011_23_0021_10_0029
-4255.78	3.499	-66.054	3.559	0.536	q1_ao_14_e1_1_8_0002_20_0011_23_0021_10_0037
-4254.76	3.481	-71.928	3.538	0.536	q1_ao_14_e1_1_8_0002_20_0011_23_0022_10_0020
-4253.56	3.446	-65.616	3.535	0.536	q1_ao_14_e1_1_8_0002_20_0011_23_0022_10_0027
-4255.66	3.429	-66.327	3.522	0.536	q1_ao_14_e1_1_8_0002_20_0011_23_0022_10_0033
-4256.1	3.322	-66.174	3.559	0.536	q1_ao_14_e1_1_8_0002_20_0011_23_0025_10_0005
-4257.99	3.508	-67.124	3.551	0.536	q1_ao_14_e1_1_8_0002_20_0011_23_0025_10_0014
-4257.97	3.515	-67.363	3.552	0.536	q1_ao_14_e1_1_8_0002_20_0011_23_0025_10_0015
-4257.61	3.497	-67.392	3.563	0.536	q1_ao_14_e1_1_8_0002_20_0011_23_0025_10_0019
-4255.88	3.517	-66.629	3.56	0.536	q1_ao_14_e1_1_8_0002_20_0011_23_0025_10_0025
-4258.46	3.446	-67.324	3.53	0.536	q1_ao_14_e1_1_8_0002_20_0011_23_0025_10_0032
-4258.75	3.559	-67.3	3.539	0.536	q1_ao_14_e1_1_8_0002_20_0011_23_0025_10_0035
-4253.88	3.566	-66.331	3.547	0.536	q1_ao_14_e1_1_8_0002_20_0011_23_0025_10_0036
-4256	3.543	-67.582	3.591	0.536	q1_ao_14_e1_1_8_0002_20_0011_23_0037_10_0001
-4257.11	3.452	-66.072	3.55	0.536	q1_ao_14_e1_1_8_0002_20_0011_23_0037_10_0017
-4257.26	3.511	-65.197	3.536	0.536	q1_ao_14_e1_1_8_0002_20_0011_23_0037_10_0021
-4256.19	3.5	-66.782	3.552	0.536	q1_ao_14_e1_1_8_0002_20_0011_23_0037_10_0023
-4256.52	3.484	-66.282	3.516	0.536	q1_ao_14_e1_1_8_0002_20_0011_23_0040_10_0005
-4257.88	3.323	-68.23	3.519	0.536	q1_ao_14_e1_1_8_0002_20_0011_23_0040_10_0012
-4251.73	3.225	-65.785	3.566	0.536	q1_ao_14_e1_1_8_0002_20_0011_23_0040_10_0025
-4255.99	3.403	-66.082	3.439	0.536	q1_ao_14_e1_1_8_0002_20_0011_23_0040_10_0026
-4255.38	3.861	-59.121	3.573	0.536	q1_ao_14_e1_1_8_0002_20_0014_24_0033_11_0026
-4226.71	4.288	-48.672	3.558	0.536	q1_ao_14_e1_1_8_0002_20_0014_24_0037_11_0025
-4252.12	3.589	-59.017	3.555	0.536	q1_ao_14_e1_1_8_0002_20_0023_24_0016_13_0027
-4231.33	3.81	-60.688	3.68	0.536	q1_ao_10_e1_1_34_0001_1_0010_1_0024_1_0017
-4215.58	3.791	-58.277	3.699	0.536	q1_ao_10_e1_1_34_0001_1_0010_1_0024_1_0031
-4215.79	3.114	-54.188	3.456	0.536	q1_ao_10_e1_1_34_0001_1_0025_1_0002_1_0011
-4212.3	3.082	-54.877	3.485	0.536	q1_ao_10_e1_1_34_0001_1_0025_1_0002_1_0014
-4215.69	2.989	-54.732	3.453	0.536	q1_ao_10_e1_1_34_0001_1_0025_1_0002_1_0016
-4213.7	3.156	-54.1	3.476	0.536	q1_ao_10_e1_1_34_0001_1_0025_1_0002_1_0017
-4214.46	3.222	-53.943	3.455	0.536	q1_ao_10_e1_1_34_0001_1_0025_1_0002_1_0028
-4214.45	3.266	-53.932	3.495	0.536	q1_ao_10_e1_1_34_0001_1_0025_1_0002_1_0034
-4214.2	3.123	-54.609	3.484	0.536	q1_ao_10_e1_1_34_0001_1_0025_1_0002_1_0036
-4213.71	3.013	-55.246	3.556	0.536	q1_ao_10_e1_1_34_0001_1_0025_1_0003_1_0001
-4215.31	2.861	-54.328	3.529	0.536	q1_ao_10_e1_1_34_0001_1_0025_1_0003_1_0011
-4213.68	2.99	-55.076	3.562	0.536	q1_ao_10_e1_1_34_0001_1_0025_1_0003_1_0026
-4213.94	2.969	-55.605	3.551	0.536	q1_ao_10_e1_1_34_0001_1_0025_1_0003_1_0030
-4219.24	2.957	-55.531	3.553	0.536	q1_ao_10_e1_1_34_0001_1_0025_1_0003_1_0037
-4216.67	2.944	-54.54	3.467	0.536	q1_ao_10_e1_1_34_0001_1_0025_1_0024_1_0013
-4252.94	5.611	-54.634	3.641	0.536	q1_ao_14_e1_9_22_0002_27_0038_30_0002_30_0018
-4254.72	6.894	-62.067	3.817	0.536	q1_ao_14_e1_9_22_0002_27_0038_30_0002_30_0033
-4221.4	7.482	-58.979	3.582	0.536	q1_ao_16_e1_4_67_0002_33_0005_37_0027_34_0001
-4236.52	0.948	-56.419	3.744	0.536	q1_ao_19_e1_1_36_0002_44_0025_48_0039_37_0015
-4260.23	8.295	-57.089	3.766	0.536	q1_ao_20_e1_5_91_0001_54_0023_57_0010_41_0028
-4258.15	7.449	-56.729	3.756	0.536	q1_ao_20_e1_5_91_0001_54_0023_57_0010_41_0029
-4272.01	5.215	-56.391	3.571	0.536	q1_ao_2_e1_8_70_0002_64_0031_66_0025_53_0033
-4280.54	5.957	-59.699	3.633	0.536	q1_ao_2_e1_8_70_0002_64_0031_66_0027_53_0004
-4225.74	5.941	-55.816	3.894	0.536	q1_ao_4_e1_10_58_0001_71_0024_72_0001_70_0008
-4223.5	11.752	-55.674	4.002	0.536	q1_ao_4_e1_10_58_0001_71_0024_72_0008_70_0007
-4213.44	4.552	-44.873	3.908	0.536	q1_ao_4_e1_10_58_0001_71_0024_72_0017_70_0012
-4216.2	5.125	-48.23	3.967	0.536	q1_ao_4_e1_10_58_0001_71_0024_72_0030_70_0016
-4227.9	5.042	-53.818	3.88	0.536	q1_ao_4_e1_10_58_0001_71_0024_72_0036_70_0008
-4229.79	5.052	-56.441	3.773	0.536	q1_ao_4_e1_10_58_0001_71_0026_72_0014_71_0036
-4235.46	5.01	-59.725	3.738	0.536	q1_ao_4_e1_10_58_0001_71_0026_72_0014_71_0037
-4244.7	7.294	-78.992	3.96	0.536	q1_ao_4_e1_4_14_0002_73_0013_74_0033_75_0017
-4240.41	7.118	-73.152	4.017	0.536	q1_ao_4_e1_4_14_0002_73_0013_74_0033_75_0022
-4244.83	7.367	-79.473	4.03	0.536	q1_ao_4_e1_4_14_0002_73_0013_74_0033_75_0027
-4235.63	13.508	-59.928	3.759	0.536	q1_ao_4_e1_4_14_0002_73_0015_74_0012_76_0034
-4242.8	11.463	-70.981	3.868	0.536	q1_ao_4_e1_4_14_0002_73_0018_74_0001_77_0013
-4233.61	14.598	-68.484	3.785	0.536	q1_ao_4_e1_4_14_0002_73_0018_74_0010_77_0014
-4235.79	15.388	-68.126	3.792	0.536	q1_ao_4_e1_4_14_0002_73_0018_74_0032_77_0029
-4228.76	4.87	-62.566	3.76	0.536	q1_ao_4_e1_4_14_0002_73_0030_74_0001_77_0038
-4239.4	5.66	-72.9	3.868	0.536	q1_ao_4_e1_4_14_0002_73_0030_74_0026_78_0003
-4236.68	11.423	-62.178	3.783	0.536	q1_ao_4_e1_4_14_0002_73_0040_74_0015_78_0035
-4220.42	6.261	-52.576	3.773	0.536	q1_ao_4_e1_5_46_0001_74_0009_75_0026_79_0010
-4227.33	6.458	-67.155	3.907	0.536	q1_ao_4_e1_5_91_0002_74_0001_75_0010_79_0010
-4230.58	6.114	-66.739	3.825	0.536	q1_ao_4_e1_5_91_0002_74_0001_75_0010_79_0016
-4210.9	7.065	-53.87	3.984	0.536	q1_ao_4_e1_5_91_0002_74_0001_75_0027_79_0031
-4232.38	6.515	-63.707	3.77	0.536	q1_ao_4_e1_5_91_0002_74_0010_75_0038_80_0013
-4225.03	6.501	-58.853	3.772	0.536	q1_ao_4_e1_5_91_0002_74_0010_75_0038_80_0021
-4229.19	6.974	-63.096	3.785	0.536	q1_ao_4_e1_5_91_0002_74_0010_75_0038_80_0033
-4233.65	6.53	-62.202	3.737	0.536	q1_ao_4_e1_5_91_0002_74_0010_75_0038_80_0034
-4221.18	7.484	-59.044	3.907	0.536	q1_ao_4_e1_5_91_0002_74_0023_75_0033_81_0003
-4219.27	8.571	-57.52	3.867	0.536	q1_ao_4_e1_5_91_0002_74_0023_75_0034_81_0022
-4214.24	7.644	-52.45	3.927	0.536	q1_ao_4_e1_5_91_0002_74_0023_75_0039_81_0034
-4261.87	4.314	-51.301	3.854	0.536	q1_ao_9_e1_5_78_0002_96_0015_96_0020_95_0001
-4262.67	4.225	-52.493	3.873	0.536	q1_ao_9_e1_5_78_0002_96_0015_96_0020_95_0024
-4281.4	8.358	-70.361	3.871	0.536	q1_ao_9_e1_6_14_0002_96_0004_96_0017_95_0004
-4281.02	8.19	-68.431	3.861	0.536	q1_ao_9_e1_6_14_0002_96_0004_96_0017_95_0007
-4277	9.56	-66.207	3.826	0.536	q1_ao_9_e1_6_14_0002_96_0004_96_0022_96_0012
-4282.14	7.206	-71.008	3.886	0.536	q1_ao_9_e1_6_14_0002_96_0022_96_0009_96_0015
-4283.49	8.003	-71.169	3.785	0.536	q1_ao_9_e1_6_14_0002_96_0022_96_0012_96_0005
-4284.16	7.337	-70.819	3.766	0.536	q1_ao_9_e1_6_14_0002_96_0022_96_0027_96_0037
-4280.12	7.214	-71.194	3.819	0.536	q1_ao_9_e1_6_14_0002_96_0022_96_0032_96_0020
-4250.31	3.882	-61.046	3.491	0.536	q1_ao_14_e1_1_8_0002_20_0004_23_0016_9_0028
-4255.52	3.428	-65.606	3.548	0.536	q1_ao_14_e1_1_8_0002_20_0011_23_0003_9_0006
-4259	3.368	-68.797	3.539	0.536	q1_ao_14_e1_1_8_0002_20_0011_23_0003_9_0009
-4255.38	3.609	-65.63	3.548	0.536	q1_ao_14_e1_1_8_0002_20_0011_23_0003_9_0018
-4258.5	3.467	-68.038	3.543	0.536	q1_ao_14_e1_1_8_0002_20_0011_23_0003_9_0022
-4260.22	3.535	-66.879	3.55	0.536	q1_ao_14_e1_1_8_0002_20_0011_23_0003_9_0024
-4258.96	3.322	-67.963	3.549	0.536	q1_ao_14_e1_1_8_0002_20_0011_23_0003_9_0028
-4256.6	3.655	-65.541	3.55	0.536	q1_ao_14_e1_1_8_0002_20_0011_23_0003_9_0034
-4255.4	3.148	-68.152	3.506	0.536	q1_ao_14_e1_1_8_0002_20_0011_23_0005_9_0011
-4254.05	3.279	-65.919	3.529	0.536	q1_ao_14_e1_1_8_0002_20_0011_23_0005_9_0017
-4260.66	7.392	-48.758	3.821	0.524	q1_ao_11_e1_5_53_0001_9_0017
-4256.21	3.549	-65.08	3.551	0.524	q1_ao_14_e1_1_8_0002_20_0011_23_0003_0001
-4256.8	3.556	-65.842	3.499	0.524	q1_ao_14_e1_1_8_0002_20_0011_23_0018_0001
-4256.52	3.418	-66.05	3.528	0.524	q1_ao_14_e1_1_8_0002_20_0011_23_0032_0001
-4234.1	5.543	-48.192	3.423	0.524	q1_ao_19_e1_8_74_0001_47_0035_53_0032_0001
-4253.89	32.845	-40.019	3.711	0.524	q1_ao_2_e1_10_66_0001_59_0036_63_0003_0001
-4268.38	5.896	-50.688	3.568	0.524	q1_ao_2_e1_8_70_0002_64_0031_66_0007_0001
-4212.63	5.21	-47.757	3.941	0.524	q1_ao_4_e1_10_58_0001_71_0024_72_0030_0001
-4210.92	7.435	-53.142	3.935	0.524	q1_ao_4_e1_5_91_0002_74_0001_75_0027_0001
-4254.52	5.13	-47.017	3.853	0.524	q1_ao_9_e1_5_78_0002_96_0034_96_0019_0001
-4274.13	8.174	-64.887	3.831	0.524	q1_ao_9_e1_6_14_0002_96_0022_96_0032_0001
-4277.22	6.775	-71.081	3.845	0.524	q1_ao_9_e1_6_14_0002_96_0027_96_0025_0001
-4263.86	4.055	-49.341	3.426	0.524	q1_ao_9_e1_6_14_0002_96_0027_96_0035_0001
-4272.56	8.142	-61.22	3.769	0.524	q1_ao_9_e1_6_14_0002_96_0027_96_0038_0001
-4257.98	3.439	-66.534	3.525	0.524	q1_ao_14_e1_1_8_0002_20_0011_23_0006_10_0017
-4256.24	3.295	-64.407	3.498	0.524	q1_ao_14_e1_1_8_0002_20_0011_23_0006_10_0018
-4254.25	3.856	-63.667	3.578	0.524	q1_ao_14_e1_1_8_0002_20_0011_23_0025_10_0004
-4258.17	3.511	-65.393	3.535	0.524	q1_ao_14_e1_1_8_0002_20_0011_23_0025_10_0006
-4256.94	3.418	-66.83	3.551	0.524	q1_ao_14_e1_1_8_0002_20_0011_23_0025_10_0033
-4257.93	3.315	-66.497	3.517	0.524	q1_ao_14_e1_1_8_0002_20_0011_23_0032_10_0001
-4255.26	3.165	-66.405	3.522	0.524	q1_ao_14_e1_1_8_0002_20_0011_23_0032_10_0005
-4255.26	3.531	-65.652	3.541	0.524	q1_ao_14_e1_1_8_0002_20_0011_23_0032_10_0019
-4260.97	3.468	-68.394	3.55	0.524	q1_ao_14_e1_1_8_0002_20_0011_23_0037_10_0015
-4259.06	3.503	-66.809	3.508	0.524	q1_ao_14_e1_1_8_0002_20_0011_23_0040_10_0040
-4246.51	3.983	-53.996	3.592	0.524	q1_ao_14_e1_1_8_0002_20_0014_24_0022_11_0006
-4251.05	3.801	-51.896	3.548	0.524	q1_ao_14_e1_1_8_0002_20_0014_24_0033_11_0004
-4259.8	3.807	-61.38	3.639	0.524	q1_ao_14_e1_1_8_0002_20_0014_24_0033_11_0005
-4256.46	3.738	-59.793	3.677	0.524	q1_ao_14_e1_1_8_0002_20_0014_24_0033_11_0008
-4260.61	3.851	-60.368	3.598	0.524	q1_ao_14_e1_1_8_0002_20_0014_24_0033_11_0011
-4260.66	3.521	-61.739	3.573	0.524	q1_ao_14_e1_1_8_0002_20_0014_24_0033_11_0020
-4260.78	3.843	-61.969	3.588	0.524	q1_ao_14_e1_1_8_0002_20_0014_24_0033_11_0039
-4256.98	4.049	-58.108	3.595	0.524	q1_ao_14_e1_1_8_0002_20_0014_24_0033_11_0040
-4247.74	2.988	-57.422	3.53	0.524	q1_ao_14_e1_1_8_0002_20_0023_24_0016_13_0006
-4233.36	3.476	-60.968	3.705	0.524	q1_ao_10_e1_1_34_0001_1_0010_1_0019_1_0011
-4219.6	3.425	-59.018	3.698	0.524	q1_ao_10_e1_1_34_0001_1_0010_1_0019_1_0021
-4222.36	3.281	-63.178	3.675	0.524	q1_ao_10_e1_1_34_0001_1_0010_1_0019_1_0039
-4229.6	3.673	-60.19	3.739	0.524	q1_ao_10_e1_1_34_0001_1_0010_1_0024_1_0007
-4229.29	3.796	-60.653	3.734	0.524	q1_ao_10_e1_1_34_0001_1_0010_1_0024_1_0035
-4205.38	3.472	-44.657	3.345	0.524	q1_ao_16_e1_4_41_0002_33_0033_36_0022_33_0036
-4207.17	3.659	-45.441	3.381	0.524	q1_ao_16_e1_4_41_0002_33_0033_36_0032_33_0002
-4206.97	3.904	-44.724	3.374	0.524	q1_ao_16_e1_4_41_0002_33_0033_36_0032_33_0028
-4260.37	7.312	-56.571	3.756	0.524	q1_ao_20_e1_5_91_0001_54_0023_57_0010_41_0024
-4258.7	7.453	-56.394	3.777	0.524	q1_ao_20_e1_5_91_0001_54_0023_57_0010_41_0038
-4219.84	4.528	-36.254	3.37	0.524	q1_ao_20_e1_6_47_0002_55_0018_57_0040_42_0020
-4258.7	3.529	-51.355	3.853	0.524	q1_ao_20_e1_6_47_0002_55_0018_57_0040_42_0026
-4272.5	5.888	-52.872	3.591	0.524	q1_ao_2_e1_8_70_0002_64_0031_66_0027_53_0008
-4284.9	6.363	-71.729	3.926	0.524	q1_ao_3_e1_7_92_0002_70_0023_71_0001_68_0022
-4237.39	11.714	-61.513	3.974	0.524	q1_ao_4_e1_10_58_0001_71_0024_72_0017_70_0001
-4232.53	11.858	-55.467	4.033	0.524	q1_ao_4_e1_10_58_0001_71_0024_72_0039_70_0009
-4223.7	4.75	-54.753	3.82	0.524	q1_ao_4_e1_10_58_0001_71_0026_72_0014_71_0016
-4228.91	4.568	-55.788	3.811	0.524	q1_ao_4_e1_10_58_0001_71_0026_72_0020_71_0006
-4225.14	4.529	-54.348	3.786	0.524	q1_ao_4_e1_10_58_0001_71_0026_72_0020_71_0019
-4232.22	4.708	-59.331	3.813	0.524	q1_ao_4_e1_10_58_0001_71_0026_72_0020_71_0033
-4229.75	12.486	-58.056	3.865	0.524	q1_ao_4_e1_10_58_0001_71_0030_72_0002_71_0025
-4241.81	4.573	-67.534	3.751	0.524	q1_ao_4_e1_4_14_0002_73_0030_74_0001_77_0022
-4223.59	7.445	-54.492	3.923	0.524	q1_ao_4_e1_5_91_0002_74_0001_75_0027_79_0016
-4219.88	7.041	-57.277	3.939	0.524	q1_ao_4_e1_5_91_0002_74_0001_75_0027_79_0034
-4249.77	3.991	-60.008	3.545	0.524	q1_ao_14_e1_1_39_0001_20_0027_23_0022_7_0026
-4233.7	6.231	-60.708	3.712	0.524	q1_ao_4_e1_5_91_0002_74_0010_75_0038_80_0031
-4220.06	8.571	-58.202	3.921	0.524	q1_ao_4_e1_5_91_0002_74_0023_75_0008_80_0029
-4219.89	8.014	-57.196	3.874	0.524	q1_ao_4_e1_5_91_0002_74_0023_75_0016_80_0012
-4226.02	7.529	-57.022	3.845	0.524	q1_ao_4_e1_5_91_0002_74_0023_75_0016_80_0021
-4260.09	6.574	-54.212	3.917	0.524	q1_ao_9_e1_5_78_0002_96_0034_96_0010_95_0004
-4277.62	7.912	-70.035	3.868	0.524	q1_ao_9_e1_6_14_0002_96_0004_96_0018_95_0002
-4278.62	9.026	-66.127	3.849	0.524	q1_ao_9_e1_6_14_0002_96_0004_96_0022_96_0008
-4280.52	8.409	-70.148	3.944	0.524	q1_ao_9_e1_6_14_0002_96_0004_96_0022_96_0018
-4269.95	8.821	-62.312	3.747	0.524	q1_ao_9_e1_6_14_0002_96_0022_96_0009_96_0003
-4273.42	8.344	-60.764	3.728	0.524	q1_ao_9_e1_6_14_0002_96_0022_96_0009_96_0013
-4274.37	8.152	-62.429	3.783	0.524	q1_ao_9_e1_6_14_0002_96_0022_96_0009_96_0016
-4270.15	14.192	-60.314	3.797	0.524	q1_ao_9_e1_6_14_0002_96_0022_96_0012_96_0023
-4265.43	14.283	-59.241	3.838	0.524	q1_ao_9_e1_6_14_0002_96_0022_96_0012_96_0030
-4270.55	8.484	-61.161	3.739	0.524	q1_ao_9_e1_6_14_0002_96_0022_96_0017_96_0015
-4268.18	8.422	-57.419	3.726	0.524	q1_ao_9_e1_6_14_0002_96_0022_96_0022_96_0009
-4284.83	8.063	-74.058	3.733	0.524	q1_ao_9_e1_6_14_0002_96_0022_96_0022_96_0024
-4271.26	7.024	-57.98	3.614	0.524	q1_ao_9_e1_6_14_0002_96_0022_96_0026_96_0008
-4278.19	7.451	-69.74	3.809	0.524	q1_ao_9_e1_6_14_0002_96_0022_96_0032_96_0023
-4208.66	21.995	-47.755	3.918	0.512	q1_ao_4_e1_5_46_0001
-4226.42	22.605	-50.874	3.841	0.512	q1_ao_10_e1_5_49_0002
-4250	23.738	-46.891	3.787	0.512	q1_ao_14_e1_5_5_0001
-4213.22	22.22	-49.32	3.892	0.512	q1_ao_17_e1_10_99_0002
-4250.13	22.592	-48.751	3.754	0.512	q1_ao_14_e1_5_5_0001_23_0017
-4254.92	25.592	-49.08	3.788	0.512	q1_ao_14_e1_5_5_0001_23_0028
-4253.01	23.971	-47.319	3.781	0.512	q1_ao_14_e1_5_5_0001_23_0039
-4268.93	7.736	-63.584	3.537	0.512	q1_ao_14_e1_9_22_0002_27_0002
-4232.04	22.376	-53.55	3.922	0.512	q1_ao_10_e1_5_49_0002_3_0034
-4265.12	5.759	-45.544	3.562	0.512	q1_ao_2_e1_8_70_0002_64_0031
-4221.8	5.064	-51.657	3.819	0.512	q1_ao_4_e1_10_58_0001_71_0026
-4259.16	19.05	-44.776	3.612	0.512	q1_ao_11_e1_10_8_0002_7_0038
-4252.32	26.169	-50.223	3.732	0.512	q1_ao_6_e1_10_68_0001_81_0001
-4271.16	7.996	-57.815	3.757	0.512	q1_ao_9_e1_6_14_0002_96_0027
-4263.84	26.011	-47.27	3.601	0.512	q1_ao_11_e1_10_8_0002_7_0038_15_0007_0001
-4222.4	23.43	-51.617	3.963	0.512	q1_ao_10_e1_10_5_0001_1_0037_1_0007_0001
-4222.36	3.971	-59.181	3.717	0.512	q1_ao_10_e1_1_34_0001_1_0010_1_0024_0001
-4237.95	4	-48.437	3.703	0.512	q1_ao_14_e1_1_8_0002_20_0015_24_0004_0001
-4237.97	3.911	-49.682	3.703	0.512	q1_ao_14_e1_1_8_0002_20_0015_24_0013_0001
-4234.85	3.98	-49.317	3.714	0.512	q1_ao_14_e1_1_8_0002_20_0015_24_0014_0001
-4249.27	22.78	-48.491	3.772	0.512	q1_ao_14_e1_5_5_0001_23_0017_25_0006_0001
-4252.83	22.9	-49.362	3.76	0.512	q1_ao_14_e1_5_5_0001_23_0017_25_0011_0001
-4254.17	25.111	-49.215	3.782	0.512	q1_ao_14_e1_5_5_0001_23_0039_25_0021_0001
-4254.11	24.688	-48.545	3.786	0.512	q1_ao_14_e1_5_5_0001_23_0039_25_0030_0001
-4266.53	7.285	-63.698	3.546	0.512	q1_ao_14_e1_9_22_0002_27_0002_29_0005_0001
-4262.54	6.265	-65.107	3.762	0.512	q1_ao_14_e1_9_22_0002_27_0002_29_0024_0001
-4223.69	24.996	-53.037	3.89	0.512	q1_ao_17_e1_10_99_0002_36_0013_41_0005_0001
-4245.94	7.093	-40.988	3.726	0.512	q1_ao_20_e1_5_91_0001_54_0023_57_0004_0001
-4255.9	21.74	-50.995	3.831	0.512	q1_ao_20_e1_5_91_0001_54_0023_57_0035_0001
-4259.71	6.782	-44.628	3.521	0.512	q1_ao_2_e1_10_66_0001_59_0036_63_0031_0001
-4266.34	5.943	-49.799	3.571	0.512	q1_ao_2_e1_8_70_0002_64_0031_66_0025_0001
-4265.58	5.988	-49.982	3.578	0.512	q1_ao_2_e1_8_70_0002_64_0031_66_0027_0001
-4253.88	8.052	-39.263	3.588	0.512	q1_ao_2_e1_8_70_0002_64_0031_66_0038_0001
-4235.44	7.332	-67.706	4.072	0.512	q1_ao_4_e1_4_14_0002_73_0013_74_0033_0001
-4240.86	14.724	-65.322	3.734	0.512	q1_ao_4_e1_4_14_0002_73_0018_74_0032_0001
-4230.57	15.019	-64.542	3.867	0.512	q1_ao_4_e1_4_14_0002_73_0030_74_0001_0001
-4245.26	11.396	-70.779	3.958	0.512	q1_ao_4_e1_4_14_0002_73_0040_74_0040_0001
-4265.38	6.764	-50.838	3.899	0.512	q1_ao_9_e1_5_78_0002_96_0034_96_0010_0001
-4269.87	8.624	-59.606	3.709	0.512	q1_ao_9_e1_6_14_0002_96_0022_96_0009_0001
-4263.89	17.463	-53.851	3.793	0.512	q1_ao_9_e1_6_14_0002_96_0022_96_0012_0001
-4256.1	3.532	-65.332	3.527	0.512	q1_ao_14_e1_1_8_0002_20_0011_23_0006_10_0001
-4245.24	3.698	-56.184	3.605	0.512	q1_ao_14_e1_1_8_0002_20_0014_24_0002_10_0025
-4247.68	3.357	-53.645	3.653	0.512	q1_ao_14_e1_1_8_0002_20_0014_24_0005_11_0002
-4244.71	3.957	-56.072	3.629	0.512	q1_ao_14_e1_1_8_0002_20_0014_24_0006_11_0021
-4244.6	3.925	-53.568	3.634	0.512	q1_ao_14_e1_1_8_0002_20_0014_24_0006_11_0023
-4248.41	3.567	-54.376	3.624	0.512	q1_ao_14_e1_1_8_0002_20_0014_24_0020_11_0015
-4248.7	3.439	-53.902	3.624	0.512	q1_ao_14_e1_1_8_0002_20_0014_24_0020_11_0022
-4247.47	4.145	-60.304	3.586	0.512	q1_ao_14_e1_1_8_0002_20_0014_24_0022_11_0016
-4248.52	4.045	-55.025	3.587	0.512	q1_ao_14_e1_1_8_0002_20_0014_24_0022_11_0018
-4245.31	4.053	-61.553	3.601	0.512	q1_ao_14_e1_1_8_0002_20_0014_24_0022_11_0022
-4246.78	4.001	-54.787	3.596	0.512	q1_ao_14_e1_1_8_0002_20_0014_24_0022_11_0031
-4242.56	3.746	-47.222	3.675	0.512	q1_ao_14_e1_1_8_0002_20_0014_24_0028_11_0013
-4245.31	3.981	-53.944	3.622	0.512	q1_ao_14_e1_1_8_0002_20_0014_24_0028_11_0025
-4250.05	3.934	-58.272	3.616	0.512	q1_ao_14_e1_1_8_0002_20_0014_24_0033_11_0024
-4237.54	3.731	-51.185	3.692	0.512	q1_ao_14_e1_1_8_0002_20_0015_24_0004_11_0017
-4234.55	3.883	-47.099	3.703	0.512	q1_ao_14_e1_1_8_0002_20_0015_24_0004_11_0024
-4239.72	3.811	-48.665	3.658	0.512	q1_ao_14_e1_1_8_0002_20_0015_24_0013_12_0013
-4239.76	3.847	-50.029	3.704	0.512	q1_ao_14_e1_1_8_0002_20_0015_24_0013_12_0016
-4241.03	3.999	-55.107	3.64	0.512	q1_ao_14_e1_1_8_0002_20_0015_24_0013_12_0020
-4243.98	4.1	-53.963	3.657	0.512	q1_ao_14_e1_1_8_0002_20_0015_24_0014_12_0015
-4237.6	3.901	-50.791	3.685	0.512	q1_ao_14_e1_1_8_0002_20_0015_24_0014_12_0037
-4236.59	3.909	-50.248	3.715	0.512	q1_ao_14_e1_1_8_0002_20_0015_24_0014_12_0039
-4239.14	3.994	-49.903	3.644	0.512	q1_ao_14_e1_1_8_0002_20_0015_24_0028_12_0014
-4237.9	3.828	-49.152	3.678	0.512	q1_ao_14_e1_1_8_0002_20_0015_24_0034_12_0018
-4240.98	3.674	-58.251	3.65	0.512	q1_ao_14_e1_1_8_0002_20_0015_24_0034_12_0026
-4237.92	3.745	-54.476	3.544	0.512	q1_ao_14_e1_1_8_0002_20_0023_24_0005_12_0007
-4245.38	0.627	-53.439	3.535	0.512	q1_ao_14_e1_1_8_0002_20_0023_24_0016_13_0032
-4247.8	3.685	-61.309	3.575	0.512	q1_ao_14_e1_1_8_0002_20_0023_24_0028_13_0023
-4246.16	3.936	-61.186	3.565	0.512	q1_ao_14_e1_1_8_0002_20_0023_24_0039_13_0009
-4247.19	3.789	-60.336	3.57	0.512	q1_ao_14_e1_1_8_0002_20_0023_24_0039_13_0016
-4246.58	3.902	-54.887	3.562	0.512	q1_ao_14_e1_1_8_0002_20_0023_24_0039_13_0020
-4245.58	3.9	-61.12	3.553	0.512	q1_ao_14_e1_1_8_0002_20_0023_24_0039_13_0023
-4245.67	4.038	-53.606	3.556	0.512	q1_ao_14_e1_1_8_0002_20_0023_24_0039_13_0026
-4247.26	3.858	-54.377	3.553	0.512	q1_ao_14_e1_1_8_0002_20_0023_24_0039_13_0031
-4253.02	3.766	-62.814	3.602	0.512	q1_ao_14_e1_1_8_0002_20_0038_24_0022_14_0001
-4246.54	23.16	-48.115	3.77	0.512	q1_ao_14_e1_5_5_0001_23_0017_25_0006_14_0001
-4242.53	22.559	-45.542	3.751	0.512	q1_ao_14_e1_5_5_0001_23_0017_25_0006_14_0012
-4252.69	22.623	-46.149	3.764	0.512	q1_ao_14_e1_5_5_0001_23_0017_25_0006_14_0016
-4251.48	22.407	-48.479	3.779	0.512	q1_ao_14_e1_5_5_0001_23_0017_25_0006_14_0018
-4247.51	22.731	-49.385	3.762	0.512	q1_ao_14_e1_5_5_0001_23_0017_25_0006_14_0020
-4248.92	23.393	-48.95	3.798	0.512	q1_ao_14_e1_5_5_0001_23_0017_25_0006_14_0029
-4210.66	4.088	-51.833	3.743	0.512	q1_ao_10_e1_1_34_0001_1_0019_1_0035_1_0014
-4209.26	3.26	-57.001	3.686	0.512	q1_ao_10_e1_1_34_0001_1_0019_1_0035_1_0028
-4218.47	4.113	-52.859	3.647	0.512	q1_ao_10_e1_1_34_0001_1_0019_1_0035_1_0039
-4268.7	5.421	-66.118	3.791	0.512	q1_ao_14_e1_9_22_0002_27_0038_30_0040_24_0038
-4275.44	6.831	-68.522	3.571	0.512	q1_ao_14_e1_9_22_0002_27_0002_29_0005_28_0021
-4264.02	5.874	-68.908	3.766	0.512	q1_ao_14_e1_9_22_0002_27_0002_29_0024_29_0004
-4263.17	5.544	-67.455	3.757	0.512	q1_ao_14_e1_9_22_0002_27_0002_29_0024_29_0039
-4269.3	5.91	-60.691	3.803	0.512	q1_ao_14_e1_9_22_0002_27_0002_29_0029_29_0025
-4243.24	2.554	-36.44	3.301	0.512	q1_ao_14_e1_9_22_0002_27_0002_29_0032_29_0006
-4207.24	3.713	-42.369	3.402	0.512	q1_ao_16_e1_4_41_0002_33_0033_36_0032_33_0031
-4218.78	7.57	-51.018	3.53	0.512	q1_ao_16_e1_4_67_0002_33_0005_37_0014_33_0009
-4220.33	4.864	-59.815	3.428	0.512	q1_ao_16_e1_4_67_0002_33_0005_37_0027_34_0034
-4224.01	28.556	-56.565	3.871	0.512	q1_ao_17_e1_10_99_0002_36_0013_41_0005_35_0016
-4239.39	4.038	-55.969	3.659	0.512	q1_ao_19_e1_1_36_0002_44_0032_49_0030_37_0008
-4225.45	24.969	-53.503	3.952	0.512	q1_ao_10_e1_5_49_0002_3_0034_3_0022_3_0017
-4259.51	7.331	-56.868	3.763	0.512	q1_ao_20_e1_5_91_0001_54_0023_57_0010_41_0016
-4261.76	22.699	-56.025	3.828	0.512	q1_ao_20_e1_5_91_0001_54_0023_57_0035_41_0022
-4257.05	4.88	-57.904	3.653	0.512	q1_ao_20_e1_6_47_0002_55_0018_57_0040_42_0033
-4259.76	3.248	-50.136	3.195	0.512	q1_ao_20_e1_9_50_0002_58_0015_61_0022_50_0009
-4271.41	5.678	-52.001	3.595	0.512	q1_ao_2_e1_8_70_0002_64_0031_66_0007_53_0009
-4264.85	5.172	-52.66	3.532	0.512	q1_ao_2_e1_8_70_0002_64_0031_66_0025_53_0017
-4276.73	6.605	-59.929	3.907	0.512	q1_ao_3_e1_7_92_0002_70_0023_71_0001_68_0021
-4221.14	5.587	-52.928	3.915	0.512	q1_ao_4_e1_10_58_0001_71_0024_72_0008_70_0011
-4235.29	11.291	-57.879	3.956	0.512	q1_ao_4_e1_10_58_0001_71_0024_72_0008_70_0036
-4206.47	5.209	-45.174	3.908	0.512	q1_ao_4_e1_10_58_0001_71_0024_72_0030_70_0023
-4234.01	3.472	-65.029	3.677	0.512	q1_ao_4_e1_4_14_0002_73_0013_74_0006_75_0037
-4232.33	14.882	-61.233	3.832	0.512	q1_ao_4_e1_4_14_0002_73_0015_74_0012_76_0019
-4236.01	4.984	-61.196	3.731	0.512	q1_ao_4_e1_4_14_0002_73_0030_74_0001_77_0013
-4223.16	11.798	-71.052	3.951	0.512	q1_ao_4_e1_4_14_0002_73_0030_74_0013_78_0010
-4226.69	8.552	-55.195	3.851	0.512	q1_ao_4_e1_5_91_0002_74_0001_75_0010_79_0020
-4251.36	3.932	-59.669	3.664	0.512	q1_ao_14_e1_1_39_0001_20_0027_23_0008_7_0010
-4248.79	4.003	-59.166	3.521	0.512	q1_ao_14_e1_1_39_0001_20_0027_23_0018_7_0002
-4245.89	4.328	-58.382	3.539	0.512	q1_ao_14_e1_1_39_0001_20_0027_23_0018_7_0016
-4250.73	3.944	-62.165	3.561	0.512	q1_ao_14_e1_1_39_0001_20_0027_23_0018_7_0026
-4249.31	4.111	-60.071	3.524	0.512	q1_ao_14_e1_1_39_0001_20_0027_23_0018_7_0029
-4247.45	4.228	-59.084	3.514	0.512	q1_ao_14_e1_1_39_0001_20_0027_23_0022_7_0031
-4251.73	4.048	-61.52	3.626	0.512	q1_ao_14_e1_1_39_0001_20_0027_23_0038_7_0002
-4250.83	3.959	-60.798	3.617	0.512	q1_ao_14_e1_1_39_0001_20_0027_23_0038_7_0031
-4245.71	4.143	-58.392	3.623	0.512	q1_ao_14_e1_1_39_0001_20_0027_23_0038_7_0036
-4244.94	0.903	-57.68	3.598	0.512	q1_ao_6_e1_8_53_0001_83_0017_85_0028_88_0014
-4256.36	4.574	-46.52	3.709	0.512	q1_ao_9_e1_5_78_0002_96_0015_96_0020_95_0013
-4264.84	5.724	-55.259	3.827	0.512	q1_ao_9_e1_5_78_0002_96_0034_96_0001_95_0034
-4262.11	6.816	-52.672	3.913	0.512	q1_ao_9_e1_5_78_0002_96_0034_96_0010_95_0016
-4270.55	13.558	-59.809	3.85	0.512	q1_ao_9_e1_6_14_0002_96_0004_96_0017_95_0023
-4271.73	8.558	-61.711	3.752	0.512	q1_ao_9_e1_6_14_0002_96_0022_96_0009_96_0011
-4267.72	8.397	-58.79	3.79	0.512	q1_ao_9_e1_6_14_0002_96_0022_96_0009_96_0024
-4270.66	8.374	-58.421	3.736	0.512	q1_ao_9_e1_6_14_0002_96_0022_96_0009_96_0036
-4274.31	14.667	-63.525	3.786	0.512	q1_ao_9_e1_6_14_0002_96_0022_96_0012_96_0014
-4240.29	3.584	-49.177	3.696	0.5	q1_ao_14_e1_1_8_0002_20_0015
-4257.13	22.289	-51.729	3.912	0.5	q1_ao_9_e1_5_78_0002_96_0026
-4215.12	3.808	-47.153	3.493	0.5	q1_ao_12_e1_8_81_0001_14_0025_20_0009_0001
-4250.07	4.014	-58.367	3.59	0.5	q1_ao_14_e1_1_39_0001_20_0027_23_0018_0001
-4247.07	3.766	-54.36	3.609	0.5	q1_ao_14_e1_1_8_0002_20_0014_24_0006_0001
-4247.15	3.38	-53.978	3.616	0.5	q1_ao_14_e1_1_8_0002_20_0014_24_0020_0001
-4245.97	3.602	-50.253	3.628	0.5	q1_ao_14_e1_1_8_0002_20_0014_24_0021_0001
-4241.13	3.983	-50.522	3.695	0.5	q1_ao_14_e1_1_8_0002_20_0015_24_0028_0001
-4240.24	3.932	-50.261	3.689	0.5	q1_ao_14_e1_1_8_0002_20_0015_24_0034_0001
-4245.18	4.137	-52.84	3.638	0.5	q1_ao_14_e1_1_8_0002_20_0023_24_0010_0001
-4250.2	22.816	-45.825	3.857	0.5	q1_ao_14_e1_5_5_0001_23_0017_25_0015_0001
-4234.67	22.372	-57.129	3.924	0.5	q1_ao_10_e1_5_49_0002_3_0034_3_0011_0001
-4230.79	22.675	-54.695	3.937	0.5	q1_ao_10_e1_5_49_0002_3_0034_3_0022_0001
-4233.25	22.427	-56.429	3.94	0.5	q1_ao_10_e1_5_49_0002_3_0034_3_0037_0001
-4245.8	5.688	-43.119	3.153	0.5	q1_ao_20_e1_9_50_0002_58_0015_61_0016_0001
-4241.58	11.253	-69.33	3.992	0.5	q1_ao_4_e1_4_14_0002_73_0040_74_0034_0001
-4271.96	7.902	-59.51	3.747	0.5	q1_ao_9_e1_6_14_0002_96_0027_96_0008_0001
-4273.07	3.879	-62.189	3.556	0.5	q1_ao_9_e1_6_14_0002_96_0027_96_0027_0001
-4247.74	3.924	-55.643	3.613	0.5	q1_ao_14_e1_1_8_0002_20_0014_24_0010_11_0018
-4250.31	3.734	-59.011	3.692	0.5	q1_ao_14_e1_1_8_0002_20_0014_24_0010_11_0022
-4248.58	3.172	-53.93	3.613	0.5	q1_ao_14_e1_1_8_0002_20_0014_24_0020_11_0002
-4247.65	3.585	-53.271	3.624	0.5	q1_ao_14_e1_1_8_0002_20_0014_24_0020_11_0014
-4245.73	3.648	-52.254	3.633	0.5	q1_ao_14_e1_1_8_0002_20_0014_24_0020_11_0026
-4243.86	3.647	-51.769	3.633	0.5	q1_ao_14_e1_1_8_0002_20_0014_24_0020_11_0038
-4244.62	3.46	-53.731	3.637	0.5	q1_ao_14_e1_1_8_0002_20_0014_24_0020_11_0039
-4246.11	3.614	-51.213	3.644	0.5	q1_ao_14_e1_1_8_0002_20_0014_24_0021_11_0002
-4248.34	3.931	-53.833	3.635	0.5	q1_ao_14_e1_1_8_0002_20_0014_24_0021_11_0009
-4247.6	3.946	-53.163	3.638	0.5	q1_ao_14_e1_1_8_0002_20_0014_24_0021_11_0010
-4249.99	3.946	-54.093	3.635	0.5	q1_ao_14_e1_1_8_0002_20_0014_24_0021_11_0021
-4249.94	3.741	-55.829	3.639	0.5	q1_ao_14_e1_1_8_0002_20_0014_24_0021_11_0034
-4247.22	3.873	-53.926	3.593	0.5	q1_ao_14_e1_1_8_0002_20_0014_24_0022_11_0010
-4247.17	3.838	-55.929	3.64	0.5	q1_ao_14_e1_1_8_0002_20_0014_24_0028_11_0004
-4257.62	4.034	-60.111	3.624	0.5	q1_ao_14_e1_1_8_0002_20_0014_24_0033_11_0002
-4257.37	4.039	-58.85	3.64	0.5	q1_ao_14_e1_1_8_0002_20_0014_24_0033_11_0006
-4257.59	4.013	-60.566	3.665	0.5	q1_ao_14_e1_1_8_0002_20_0014_24_0033_11_0025
-4245.34	3.886	-56.448	3.683	0.5	q1_ao_14_e1_1_8_0002_20_0014_24_0037_11_0010
-4236.09	3.945	-49.357	3.715	0.5	q1_ao_14_e1_1_8_0002_20_0015_24_0004_11_0011
-4234.69	3.761	-56.446	3.733	0.5	q1_ao_14_e1_1_8_0002_20_0015_24_0004_11_0012
-4238.37	3.792	-49.462	3.701	0.5	q1_ao_14_e1_1_8_0002_20_0015_24_0004_11_0015
-4239.55	3.842	-53.287	3.697	0.5	q1_ao_14_e1_1_8_0002_20_0015_24_0004_11_0018
-4237.85	3.785	-50.056	3.693	0.5	q1_ao_14_e1_1_8_0002_20_0015_24_0004_11_0020
-4238.77	3.958	-51.655	3.713	0.5	q1_ao_14_e1_1_8_0002_20_0015_24_0004_11_0023
-4247.14	3.848	-55.756	3.672	0.5	q1_ao_14_e1_1_8_0002_20_0015_24_0004_11_0031
-4250.61	3.754	-55.046	3.717	0.5	q1_ao_14_e1_1_8_0002_20_0015_24_0006_12_0030
-4239.91	3.856	-49.679	3.669	0.5	q1_ao_14_e1_1_8_0002_20_0015_24_0013_12_0031
-4246.99	3.819	-54.819	3.671	0.5	q1_ao_14_e1_1_8_0002_20_0015_24_0014_12_0021
-4238.35	3.812	-49.884	3.687	0.5	q1_ao_14_e1_1_8_0002_20_0015_24_0028_12_0005
-4244.23	3.842	-50.995	3.644	0.5	q1_ao_14_e1_1_8_0002_20_0015_24_0028_12_0009
-4236.27	3.744	-50.197	3.687	0.5	q1_ao_14_e1_1_8_0002_20_0015_24_0028_12_0018
-4241.62	3.803	-51.07	3.648	0.5	q1_ao_14_e1_1_8_0002_20_0015_24_0028_12_0019
-4245.41	3.81	-50.513	3.643	0.5	q1_ao_14_e1_1_8_0002_20_0015_24_0028_12_0026
-4246.85	3.669	-54.984	3.668	0.5	q1_ao_14_e1_1_8_0002_20_0015_24_0028_12_0034
-4240.17	3.764	-51.215	3.685	0.5	q1_ao_14_e1_1_8_0002_20_0015_24_0034_12_0028
-4246.68	3.624	-55.535	3.694	0.5	q1_ao_14_e1_1_8_0002_20_0015_24_0034_12_0033
-4236.08	3.805	-49.715	3.727	0.5	q1_ao_14_e1_1_8_0002_20_0015_24_0034_12_0037
-4250.09	3.688	-58.404	3.569	0.5	q1_ao_14_e1_1_8_0002_20_0016_24_0013_12_0024
-4247.77	3.795	-54.025	3.556	0.5	q1_ao_14_e1_1_8_0002_20_0023_24_0010_13_0001
-4247.72	4.045	-53.141	3.643	0.5	q1_ao_14_e1_1_8_0002_20_0023_24_0010_13_0009
-4245.82	4.089	-52.523	3.628	0.5	q1_ao_14_e1_1_8_0002_20_0023_24_0010_13_0016
-4246	3.976	-52.688	3.569	0.5	q1_ao_14_e1_1_8_0002_20_0023_24_0010_13_0027
-4250.67	3.617	-55.708	3.577	0.5	q1_ao_14_e1_1_8_0002_20_0023_24_0018_13_0016
-4249.02	3.956	-54.958	3.564	0.5	q1_ao_14_e1_1_8_0002_20_0023_24_0028_13_0015
-4248.15	3.909	-59.626	3.559	0.5	q1_ao_14_e1_1_8_0002_20_0023_24_0028_13_0019
-4249.62	4.043	-54.783	3.547	0.5	q1_ao_14_e1_1_8_0002_20_0023_24_0028_13_0039
-4241.34	3.852	-55.362	3.652	0.5	q1_ao_14_e1_1_8_0002_20_0023_24_0029_13_0010
-4248.79	3.988	-54.73	3.645	0.5	q1_ao_14_e1_1_8_0002_20_0023_24_0036_13_0001
-4247.14	3.932	-53.194	3.655	0.5	q1_ao_14_e1_1_8_0002_20_0023_24_0036_13_0005
-4245.99	3.905	-52.672	3.651	0.5	q1_ao_14_e1_1_8_0002_20_0023_24_0036_13_0006
-4247.45	4.065	-54.446	3.644	0.5	q1_ao_14_e1_1_8_0002_20_0023_24_0036_13_0010
-4247.05	3.84	-53.161	3.652	0.5	q1_ao_14_e1_1_8_0002_20_0023_24_0036_13_0011
-4248.65	3.921	-54.437	3.646	0.5	q1_ao_14_e1_1_8_0002_20_0023_24_0036_13_0039
-4247.4	3.84	-54.886	3.569	0.5	q1_ao_14_e1_1_8_0002_20_0023_24_0039_13_0007
-4243.14	3.975	-50.186	3.574	0.5	q1_ao_14_e1_1_8_0002_20_0023_24_0039_13_0015
-4246.84	4.059	-53.704	3.562	0.5	q1_ao_14_e1_1_8_0002_20_0023_24_0039_13_0033
-4248.29	3.755	-56.041	3.567	0.5	q1_ao_14_e1_1_8_0002_20_0023_24_0039_13_0034
-4255.56	25.668	-50.779	3.866	0.5	q1_ao_14_e1_5_5_0001_23_0039_25_0030_14_0039
-4225.27	24.683	-53.188	4.013	0.5	q1_ao_10_e1_10_5_0001_1_0037_1_0007_1_0022
-4220.18	3.123	-58.169	3.695	0.5	q1_ao_10_e1_1_34_0001_1_0010_1_0019_1_0014
-4228.44	3.964	-57.801	3.734	0.5	q1_ao_10_e1_1_34_0001_1_0010_1_0024_1_0015
-4219.14	3.912	-59.902	3.759	0.5	q1_ao_10_e1_1_34_0001_1_0010_1_0024_1_0019
-4211.57	3.277	-55.695	3.701	0.5	q1_ao_10_e1_1_34_0001_1_0019_1_0035_1_0037
-4205.08	2.951	-42.746	3.372	0.5	q1_ao_10_e1_1_34_0001_1_0025_1_0003_1_0032
-4250.09	19.619	-54.348	3.903	0.5	q1_ao_15_e1_3_69_0002_29_0030_32_0033_31_0002
-4258.78	24.048	-58.337	3.835	0.5	q1_ao_15_e1_3_69_0002_29_0030_32_0033_31_0007
-4218.79	7.743	-50.33	3.606	0.5	q1_ao_16_e1_4_67_0002_33_0005_37_0003_33_0020
-4219.23	7.817	-58.308	3.468	0.5	q1_ao_16_e1_4_67_0002_33_0005_37_0038_34_0013
-4215.47	7.776	-59.176	3.48	0.5	q1_ao_16_e1_4_67_0002_33_0005_37_0038_34_0036
-4219.2	7.734	-58.514	3.489	0.5	q1_ao_16_e1_4_67_0002_33_0005_37_0038_34_0037
-4218.77	7.521	-59.485	3.481	0.5	q1_ao_16_e1_4_67_0002_33_0005_37_0038_34_0039
-4246.1	4.245	-60.921	3.576	0.5	q1_ao_19_e1_1_36_0002_44_0032_49_0005_37_0035
-4226.58	3.897	-48.68	3.495	0.5	q1_ao_19_e1_8_74_0001_47_0026_53_0030_39_0005
-4254.35	6.723	-51.075	3.675	0.5	q1_ao_20_e1_6_47_0002_55_0018_57_0006_41_0025
-4252.94	4.856	-56.626	3.699	0.5	q1_ao_20_e1_6_47_0002_55_0018_57_0040_42_0015
-4261.03	4.655	-58.904	3.714	0.5	q1_ao_20_e1_6_47_0002_55_0018_57_0040_42_0023
-4258.96	4.581	-58.023	3.737	0.5	q1_ao_20_e1_6_47_0002_55_0018_57_0040_42_0027
-4251.31	4.645	-57.936	3.71	0.5	q1_ao_20_e1_6_47_0002_55_0018_57_0040_42_0030
-4261.24	4.462	-58.107	3.73	0.5	q1_ao_20_e1_6_47_0002_55_0018_57_0040_42_0039
-4262.78	15.072	-58.334	3.73	0.5	q1_ao_2_e1_3_14_0001_59_0001_63_0008_51_0021
-4270.48	7.087	-51.139	3.624	0.5	q1_ao_3_e1_3_77_0001_67_0004_68_0022_55_0021
-4210.05	5.374	-46.227	3.962	0.5	q1_ao_4_e1_10_58_0001_71_0024_72_0030_70_0029
-4228.49	5.263	-60.825	3.692	0.5	q1_ao_4_e1_4_14_0002_73_0013_74_0006_75_0016
-4233.6	4.82	-71.322	3.699	0.5	q1_ao_4_e1_4_14_0002_73_0013_74_0006_75_0020
-4237.1	7.232	-70.723	4.091	0.5	q1_ao_4_e1_4_14_0002_73_0013_74_0033_75_0019
-4236.3	12.021	-64.667	3.972	0.5	q1_ao_4_e1_4_14_0002_73_0018_74_0002_77_0012
-4233.14	11.371	-69.821	3.918	0.5	q1_ao_4_e1_4_14_0002_73_0040_74_0034_78_0010
-4226.56	4.656	-63.254	3.751	0.5	q1_ao_4_e1_4_14_0002_73_0040_74_0034_78_0039
-4226.81	12.244	-60.47	3.784	0.5	q1_ao_4_e1_4_14_0002_73_0040_74_0039_78_0040
-4235.73	4.457	-66.691	3.73	0.5	q1_ao_4_e1_4_14_0002_73_0040_74_0040_78_0019
-4216.2	7.936	-48.159	3.589	0.5	q1_ao_4_e1_5_46_0001_74_0032_75_0029_79_0037
-4221.43	9.521	-56.664	3.899	0.5	q1_ao_4_e1_5_91_0002_74_0001_75_0010_79_0040
-4247.82	3.886	-58.881	3.634	0.5	q1_ao_14_e1_1_39_0001_20_0027_23_0018_7_0012
-4253.51	3.738	-61.282	3.661	0.5	q1_ao_14_e1_1_39_0001_20_0027_23_0018_7_0018
-4251.84	4.021	-62.158	3.648	0.5	q1_ao_14_e1_1_39_0001_20_0027_23_0038_7_0009
-4249.06	4.126	-58.207	3.602	0.5	q1_ao_14_e1_1_39_0001_20_0027_23_0038_7_0035
-4220.63	30.403	-53.478	3.927	0.5	q1_ao_4_e1_5_91_0002_74_0023_75_0008_80_0004
-4263.1	5.249	-56.413	3.849	0.5	q1_ao_9_e1_5_78_0002_96_0034_96_0001_95_0012
-4259.01	4.507	-55.057	3.838	0.5	q1_ao_9_e1_5_78_0002_96_0034_96_0001_95_0014
-4259.17	6.029	-54.113	4.015	0.5	q1_ao_9_e1_5_78_0002_96_0034_96_0010_95_0014
-4274.48	16.797	-60.02	3.868	0.5	q1_ao_9_e1_6_14_0002_96_0004_96_0015_95_0029
-4269.36	8.819	-62.37	3.767	0.5	q1_ao_9_e1_6_14_0002_96_0030_96_0019_98_0039
-4251.09	15.996	-43.045	3.913	0.488	q1_ao_11_e1_5_53_0001
-4241.94	3.555	-50.783	3.606	0.488	q1_ao_14_e1_1_8_0002_20_0014
-4247.35	3.883	-54.187	3.595	0.488	q1_ao_14_e1_1_8_0002_20_0023
-4221.84	23.783	-51.438	3.927	0.488	q1_ao_17_e1_10_99_0002_36_0013
-4223.99	27.959	-54.838	3.991	0.488	q1_ao_17_e1_10_99_0002_36_0039
-4252.86	27.414	-40.818	3.862	0.488	q1_ao_9_e1_10_51_0002_93_0021
-4269.57	17.71	-54.281	3.885	0.488	q1_ao_9_e1_6_14_0002_96_0004
-4253.27	2.095	-53.106	3.48	0.488	q1_ao_9_e1_8_69_0002_99_0006_100_0035_0001
-4248.63	3.837	-57.196	3.624	0.488	q1_ao_14_e1_1_39_0001_20_0027_23_0008_0001
-4245.12	4.213	-56.719	3.585	0.488	q1_ao_14_e1_1_39_0001_20_0027_23_0022_0001
-4247.92	3.838	-57.922	3.694	0.488	q1_ao_14_e1_1_39_0001_20_0027_23_0038_0001
-4243.8	3.858	-50.851	3.628	0.488	q1_ao_14_e1_1_8_0002_20_0014_24_0010_0001
-4247.34	3.906	-53.529	3.592	0.488	q1_ao_14_e1_1_8_0002_20_0014_24_0022_0001
-4245.33	3.777	-52.913	3.644	0.488	q1_ao_14_e1_1_8_0002_20_0023_24_0005_0001
-4245.95	3.998	-53.47	3.644	0.488	q1_ao_14_e1_1_8_0002_20_0023_24_0018_0001
-4248.97	3.867	-53.248	3.566	0.488	q1_ao_14_e1_1_8_0002_20_0023_24_0028_0001
-4248.84	3.781	-55.508	3.647	0.488	q1_ao_14_e1_1_8_0002_20_0023_24_0029_0001
-4244.05	4.008	-52.513	3.642	0.488	q1_ao_14_e1_1_8_0002_20_0023_24_0036_0001
-4245.66	3.923	-51.487	3.564	0.488	q1_ao_14_e1_1_8_0002_20_0023_24_0039_0001
-4209.26	12.655	-46.617	3.417	0.488	q1_ao_16_e1_4_67_0002_33_0005_37_0018_0001
-4214.33	7.629	-56.765	3.536	0.488	q1_ao_16_e1_4_67_0002_33_0005_37_0038_0001
-4221.49	25.134	-52.148	3.922	0.488	q1_ao_17_e1_10_99_0002_36_0013_41_0002_0001
-4233.63	27.097	-58.59	3.981	0.488	q1_ao_17_e1_10_99_0002_36_0040_41_0030_0001
-4208.12	9.353	-44.552	3.521	0.488	q1_ao_18_e1_4_70_0002_41_0030_47_0027_0001
-4255.68	5.072	-53.222	3.636	0.488	q1_ao_20_e1_6_47_0002_55_0018_57_0031_0001
-4210.98	22.744	-45.874	3.928	0.488	q1_ao_4_e1_5_46_0001_74_0009_75_0005_0001
-4209.56	21.716	-48.947	4.018	0.488	q1_ao_4_e1_5_46_0001_74_0032_75_0028_0001
-4212.9	8.129	-48.307	3.597	0.488	q1_ao_4_e1_5_46_0001_74_0032_75_0029_0001
-4221.85	25.398	-49.681	3.921	0.488	q1_ao_4_e1_5_46_0001_74_0035_75_0004_0001
-4256.64	5.032	-56.243	3.855	0.488	q1_ao_9_e1_5_78_0002_96_0034_96_0001_0001
-4253.22	5.488	-47.013	3.782	0.488	q1_ao_9_e1_5_78_0002_96_0034_96_0004_0001
-4270.05	16.7	-57.785	3.882	0.488	q1_ao_9_e1_6_14_0002_96_0004_96_0015_0001
-4271.51	16.263	-57.066	3.867	0.488	q1_ao_9_e1_6_14_0002_96_0004_96_0017_0001
-4244.71	3.356	-52.303	3.613	0.488	q1_ao_14_e1_1_8_0002_20_0014_24_0005_11_0037
-4232.89	3.818	-49.343	3.557	0.488	q1_ao_14_e1_1_8_0002_20_0014_24_0010_11_0017
-4247.24	3.832	-54.422	3.631	0.488	q1_ao_14_e1_1_8_0002_20_0014_24_0021_11_0039
-4243.72	3.917	-52.786	3.626	0.488	q1_ao_14_e1_1_8_0002_20_0014_24_0037_11_0004
-4240.92	3.817	-51.478	3.653	0.488	q1_ao_14_e1_1_8_0002_20_0014_24_0037_11_0018
-4245.37	3.859	-52.732	3.609	0.488	q1_ao_14_e1_1_8_0002_20_0014_24_0037_11_0033
-4245.96	3.779	-56.31	3.702	0.488	q1_ao_14_e1_1_8_0002_20_0015_24_0004_11_0005
-4245	3.564	-54.128	3.65	0.488	q1_ao_14_e1_1_8_0002_20_0015_24_0006_12_0005
-4233.61	3.888	-48.771	3.651	0.488	q1_ao_14_e1_1_8_0002_20_0015_24_0006_12_0011
-4247.4	3.845	-60.778	3.608	0.488	q1_ao_14_e1_1_8_0002_20_0015_24_0006_12_0032
-4240.37	3.928	-50.672	3.647	0.488	q1_ao_14_e1_1_8_0002_20_0015_24_0014_12_0017
-4248.61	3.809	-55.046	3.628	0.488	q1_ao_14_e1_1_8_0002_20_0023_24_0005_12_0002
-4248.46	3.771	-54.103	3.635	0.488	q1_ao_14_e1_1_8_0002_20_0023_24_0005_12_0005
-4247.26	3.916	-54.524	3.645	0.488	q1_ao_14_e1_1_8_0002_20_0023_24_0005_12_0009
-4245.81	3.857	-53.312	3.645	0.488	q1_ao_14_e1_1_8_0002_20_0023_24_0005_12_0011
-4246.45	3.954	-52.384	3.652	0.488	q1_ao_14_e1_1_8_0002_20_0023_24_0005_12_0013
-4245.94	3.837	-54.275	3.651	0.488	q1_ao_14_e1_1_8_0002_20_0023_24_0005_12_0021
-4250.74	3.761	-54.008	3.619	0.488	q1_ao_14_e1_1_8_0002_20_0023_24_0005_12_0022
-4246.18	3.703	-55.767	3.643	0.488	q1_ao_14_e1_1_8_0002_20_0023_24_0005_12_0026
-4247.33	3.811	-61.726	3.644	0.488	q1_ao_14_e1_1_8_0002_20_0023_24_0005_12_0029
-4247.79	3.887	-55.081	3.645	0.488	q1_ao_14_e1_1_8_0002_20_0023_24_0005_12_0034
-4246.85	3.808	-53.491	3.647	0.488	q1_ao_14_e1_1_8_0002_20_0023_24_0005_12_0037
-4246.68	3.846	-53.786	3.642	0.488	q1_ao_14_e1_1_8_0002_20_0023_24_0010_13_0010
-4248.44	3.841	-54.915	3.635	0.488	q1_ao_14_e1_1_8_0002_20_0023_24_0010_13_0020
-4246.08	4.136	-53.265	3.637	0.488	q1_ao_14_e1_1_8_0002_20_0023_24_0010_13_0021
-4246.58	3.954	-53.443	3.623	0.488	q1_ao_14_e1_1_8_0002_20_0023_24_0010_13_0032
-4246.57	3.975	-53.168	3.643	0.488	q1_ao_14_e1_1_8_0002_20_0023_24_0010_13_0034
-4248.22	3.896	-54.721	3.649	0.488	q1_ao_14_e1_1_8_0002_20_0023_24_0018_13_0010
-4249.37	3.772	-55.886	3.644	0.488	q1_ao_14_e1_1_8_0002_20_0023_24_0018_13_0012
-4248.14	3.886	-55.153	3.651	0.488	q1_ao_14_e1_1_8_0002_20_0023_24_0018_13_0017
-4247.73	3.985	-53.27	3.66	0.488	q1_ao_14_e1_1_8_0002_20_0023_24_0018_13_0020
-4247.58	3.924	-60.907	3.659	0.488	q1_ao_14_e1_1_8_0002_20_0023_24_0018_13_0032
-4248.62	4.061	-54.039	3.562	0.488	q1_ao_14_e1_1_8_0002_20_0023_24_0028_13_0024
-4249.99	3.786	-54.916	3.558	0.488	q1_ao_14_e1_1_8_0002_20_0023_24_0028_13_0036
-4247.3	3.807	-55.134	3.645	0.488	q1_ao_14_e1_1_8_0002_20_0023_24_0029_13_0002
-4247.79	3.792	-61.375	3.566	0.488	q1_ao_14_e1_1_8_0002_20_0023_24_0029_13_0006
-4245.82	3.764	-53.77	3.653	0.488	q1_ao_14_e1_1_8_0002_20_0023_24_0029_13_0014
-4248.19	3.845	-53.93	3.651	0.488	q1_ao_14_e1_1_8_0002_20_0023_24_0029_13_0018
-4246.83	3.722	-54.35	3.648	0.488	q1_ao_14_e1_1_8_0002_20_0023_24_0029_13_0026
-4246.23	3.907	-55.506	3.651	0.488	q1_ao_14_e1_1_8_0002_20_0023_24_0029_13_0028
-4244.98	3.936	-53.443	3.652	0.488	q1_ao_14_e1_1_8_0002_20_0023_24_0029_13_0038
-4246.14	3.884	-61.228	3.653	0.488	q1_ao_14_e1_1_8_0002_20_0023_24_0029_13_0040
-4245.77	3.835	-54.409	3.638	0.488	q1_ao_14_e1_1_8_0002_20_0023_24_0036_13_0002
-4247.52	3.778	-52.91	3.657	0.488	q1_ao_14_e1_1_8_0002_20_0023_24_0036_13_0004
-4248.33	3.697	-54.528	3.648	0.488	q1_ao_14_e1_1_8_0002_20_0023_24_0036_13_0018
-4247.6	3.942	-52.941	3.585	0.488	q1_ao_14_e1_1_8_0002_20_0023_24_0036_13_0021
-4246.62	3.857	-53.08	3.647	0.488	q1_ao_14_e1_1_8_0002_20_0023_24_0036_13_0023
-4247.93	3.73	-58.354	3.559	0.488	q1_ao_14_e1_1_8_0002_20_0023_24_0036_13_0033
-4246.62	3.807	-54.996	3.647	0.488	q1_ao_14_e1_1_8_0002_20_0023_24_0036_13_0034
-4243.74	3.945	-53.162	3.561	0.488	q1_ao_14_e1_1_8_0002_20_0023_24_0039_13_0011
-4223.07	23.328	-52.83	4.018	0.488	q1_ao_10_e1_10_5_0001_1_0037_1_0007_1_0028
-4232.03	3.98	-62.078	3.676	0.488	q1_ao_10_e1_1_34_0001_1_0010_1_0024_1_0016
-4218.56	3.312	-46.266	3.8	0.488	q1_ao_10_e1_1_34_0001_1_0019_1_0032_1_0033
-4206.24	11.698	-49.129	3.396	0.488	q1_ao_16_e1_4_67_0002_33_0005_37_0028_34_0017
-4217.14	7.956	-57.846	3.498	0.488	q1_ao_16_e1_4_67_0002_33_0005_37_0038_34_0004
-4218.09	7.95	-59.347	3.489	0.488	q1_ao_16_e1_4_67_0002_33_0005_37_0038_34_0005
-4219.1	7.636	-58.27	3.487	0.488	q1_ao_16_e1_4_67_0002_33_0005_37_0038_34_0010
-4216.95	7.914	-57.735	3.499	0.488	q1_ao_16_e1_4_67_0002_33_0005_37_0038_34_0012
-4216.61	7.858	-58.238	3.488	0.488	q1_ao_16_e1_4_67_0002_33_0005_37_0038_34_0027
-4217.15	7.698	-58.082	3.51	0.488	q1_ao_16_e1_4_67_0002_33_0005_37_0038_34_0033
-4245.3	4.44	-60.888	3.577	0.488	q1_ao_19_e1_1_36_0002_44_0032_49_0005_37_0012
-4247.59	4.245	-61.201	3.602	0.488	q1_ao_19_e1_1_36_0002_44_0032_49_0005_37_0020
-4248.1	4.06	-60.754	3.535	0.488	q1_ao_19_e1_1_36_0002_44_0032_49_0005_37_0027
-4247.11	4.21	-62.168	3.59	0.488	q1_ao_19_e1_1_36_0002_44_0032_49_0005_37_0031
-4247.37	4.289	-60.629	3.576	0.488	q1_ao_19_e1_1_36_0002_44_0032_49_0005_37_0037
-4227.31	3.395	-46.403	3.628	0.488	q1_ao_19_e1_1_36_0002_44_0032_49_0012_37_0006
-4240.95	2.781	-58.426	3.585	0.488	q1_ao_19_e1_1_36_0002_44_0032_49_0015_37_0021
-4239.02	3.795	-54.686	3.438	0.488	q1_ao_19_e1_8_74_0001_47_0026_53_0030_39_0037
-4233.16	3.624	-59.732	3.474	0.488	q1_ao_19_e1_8_74_0001_47_0040_53_0033_39_0007
-4216.7	24.914	-47.918	3.982	0.488	q1_ao_10_e1_5_49_0002_3_0034_3_0011_3_0006
-4232.58	23.207	-58.378	3.913	0.488	q1_ao_10_e1_5_49_0002_3_0034_3_0011_3_0011
-4231.67	22.984	-58.958	3.905	0.488	q1_ao_10_e1_5_49_0002_3_0034_3_0011_3_0033
-4234.43	22.38	-57.594	3.933	0.488	q1_ao_10_e1_5_49_0002_3_0034_3_0022_3_0013
-4234.16	23.024	-57.243	3.932	0.488	q1_ao_10_e1_5_49_0002_3_0034_3_0022_3_0023
-4235.29	22.118	-57.457	3.935	0.488	q1_ao_10_e1_5_49_0002_3_0034_3_0022_3_0029
-4233.75	22.768	-58.065	3.932	0.488	q1_ao_10_e1_5_49_0002_3_0034_3_0037_3_0025
-4233.98	22.062	-57.759	3.938	0.488	q1_ao_10_e1_5_49_0002_3_0034_3_0037_3_0040
-4255.06	5.027	-56.027	3.636	0.488	q1_ao_20_e1_6_47_0002_55_0018_57_0018_41_0006
-4257.41	4.651	-57.039	3.552	0.488	q1_ao_20_e1_6_47_0002_55_0018_57_0018_41_0015
-4258.06	5.218	-54.53	3.639	0.488	q1_ao_20_e1_6_47_0002_55_0018_57_0031_42_0038
-4261.44	4.606	-57.71	3.724	0.488	q1_ao_20_e1_6_47_0002_55_0018_57_0040_42_0025
-4254.06	6.221	-48.856	3.611	0.488	q1_ao_20_e1_9_50_0002_58_0015_61_0025_51_0028
-4269.21	6.786	-51.291	3.69	0.488	q1_ao_3_e1_3_77_0001_67_0004_68_0004_55_0011
-4267.65	7.36	-52.051	3.546	0.488	q1_ao_3_e1_3_77_0001_67_0004_68_0015_55_0024
-4268.44	7.005	-50.847	3.552	0.488	q1_ao_3_e1_3_77_0001_67_0004_68_0022_55_0001
-4273.94	8.555	-62.985	3.961	0.488	q1_ao_3_e1_7_92_0002_70_0019_71_0038_68_0008
-4281.01	5.378	-65.752	3.903	0.488	q1_ao_3_e1_7_92_0002_70_0019_71_0038_68_0029
-4282.17	6.343	-66.938	3.938	0.488	q1_ao_3_e1_7_92_0002_70_0023_71_0001_68_0010
-4257.32	2.375	-50.918	3.632	0.488	q1_ao_3_e1_7_92_0002_70_0023_71_0008_68_0003
-4284.23	6.147	-69.157	4	0.488	q1_ao_3_e1_7_92_0002_70_0023_71_0008_68_0016
-4283.44	6.093	-68.897	3.964	0.488	q1_ao_3_e1_7_92_0002_70_0023_71_0016_68_0018
-4261.89	6.051	-55.288	3.83	0.488	q1_ao_11_e1_9_44_0002_11_0039_17_0018_6_0012
-4270.48	4.69	-58.948	3.868	0.488	q1_ao_11_e1_9_44_0002_11_0039_17_0034_6_0019
-4232.5	3.094	-57.588	3.485	0.488	q1_ao_12_e1_8_81_0001_14_0025_20_0018_6_0036
-4227.7	11.32	-55.595	4.034	0.488	q1_ao_4_e1_10_58_0001_71_0024_72_0039_70_0030
-4230.01	5.05	-54.855	3.679	0.488	q1_ao_4_e1_10_58_0001_71_0026_72_0020_71_0022
-4248.94	4.135	-72.082	3.844	0.488	q1_ao_4_e1_10_58_0001_71_0026_72_0025_71_0025
-4248.53	3.552	-69.331	3.794	0.488	q1_ao_4_e1_10_58_0001_71_0026_72_0025_71_0031
-4225.96	10.134	-50.943	3.862	0.488	q1_ao_4_e1_10_58_0001_71_0026_72_0025_71_0033
-4245.51	5.39	-64.774	3.89	0.488	q1_ao_4_e1_10_58_0001_71_0026_72_0034_71_0021
-4246.21	5.012	-65.108	3.917	0.488	q1_ao_4_e1_10_58_0001_71_0026_72_0034_71_0028
-4212.4	4.658	-52.144	3.734	0.488	q1_ao_4_e1_4_14_0002_73_0018_74_0010_77_0035
-4246.63	11.123	-71.746	3.94	0.488	q1_ao_4_e1_4_14_0002_73_0040_74_0015_78_0006
-4227.95	12.042	-59.707	3.772	0.488	q1_ao_4_e1_4_14_0002_73_0040_74_0039_78_0026
-4229.9	11.965	-59.409	3.767	0.488	q1_ao_4_e1_4_14_0002_73_0040_74_0039_78_0029
-4235.79	6.9	-60.629	4.013	0.488	q1_ao_4_e1_4_14_0002_73_0040_74_0039_78_0033
-4212.05	22.009	-49.187	4.001	0.488	q1_ao_4_e1_5_46_0001_74_0032_75_0028_79_0022
-4212.57	8.015	-47.59	3.593	0.488	q1_ao_4_e1_5_46_0001_74_0032_75_0029_79_0031
-4213.04	7.753	-48.298	3.58	0.488	q1_ao_4_e1_5_46_0001_74_0032_75_0029_79_0034
-4234.09	28.618	-63.049	3.923	0.488	q1_ao_4_e1_5_91_0002_74_0001_75_0027_79_0026
-4252.64	4.166	-60.317	3.589	0.488	q1_ao_14_e1_1_39_0001_20_0027_23_0008_7_0017
-4248.68	4.068	-59.458	3.652	0.488	q1_ao_14_e1_1_39_0001_20_0027_23_0008_7_0035
-4248.94	4.072	-60.294	3.609	0.488	q1_ao_14_e1_1_39_0001_20_0027_23_0018_7_0024
-4244.27	4.106	-59.56	3.647	0.488	q1_ao_14_e1_1_39_0001_20_0027_23_0018_7_0030
-4246.88	4.233	-58.505	3.613	0.488	q1_ao_14_e1_1_39_0001_20_0027_23_0022_7_0001
-4247	4.163	-58.465	3.613	0.488	q1_ao_14_e1_1_39_0001_20_0027_23_0022_7_0014
-4246.75	4	-58.694	3.65	0.488	q1_ao_14_e1_1_39_0001_20_0027_23_0022_7_0032
-4245.87	4.009	-58.69	3.709	0.488	q1_ao_14_e1_1_39_0001_20_0027_23_0038_7_0012
-4247.29	3.813	-59.394	3.7	0.488	q1_ao_14_e1_1_39_0001_20_0027_23_0038_7_0014
-4244.31	3.803	-59.259	3.709	0.488	q1_ao_14_e1_1_39_0001_20_0027_23_0038_7_0034
-4225.76	20.042	-54.648	4.019	0.488	q1_ao_4_e1_5_91_0002_74_0023_75_0016_80_0028
-4221.92	7.595	-59.188	3.969	0.488	q1_ao_4_e1_5_91_0002_74_0023_75_0034_81_0004
-4265.24	6.3	-52.599	4.011	0.488	q1_ao_9_e1_5_78_0002_96_0015_96_0020_95_0004
-4260.43	4.744	-58.675	3.866	0.488	q1_ao_9_e1_5_78_0002_96_0015_96_0021_95_0024
-4268.38	5.575	-61.23	3.899	0.488	q1_ao_9_e1_5_78_0002_96_0015_96_0021_95_0036
-4254.58	6.893	-50.967	3.853	0.488	q1_ao_9_e1_5_78_0002_96_0034_96_0001_95_0002
-4261.15	6.807	-47.773	3.95	0.488	q1_ao_9_e1_5_78_0002_96_0034_96_0010_95_0024
-4271.97	17.102	-59.316	3.904	0.488	q1_ao_9_e1_6_14_0002_96_0004_96_0015_95_0001
-4271.34	16.589	-60.351	3.903	0.488	q1_ao_9_e1_6_14_0002_96_0004_96_0015_95_0020
-4273.53	16.365	-59.402	3.873	0.488	q1_ao_9_e1_6_14_0002_96_0004_96_0015_95_0030
-4216.34	27.965	-43.714	3.977	0.476	q1_ao_18_e1_5_24_0002
-4251.84	25.37	-43.462	3.738	0.476	q1_ao_11_e1_5_34_0002
-4205.9	20.759	-44.578	4.061	0.476	q1_ao_4_e1_5_91_0002
-4203.98	2.735	-53.153	3.539	0.476	q1_ao_10_e1_1_34_0001_1_0010
-4246.19	3.816	-55.749	3.623	0.476	q1_ao_14_e1_1_39_0001_20_0027
-4246.96	24.022	-44.79	3.783	0.476	q1_ao_14_e1_5_5_0001_23_0019
-4231.08	27.483	-60.509	3.976	0.476	q1_ao_17_e1_10_99_0002_36_0009
-4221.82	24.733	-51.433	3.935	0.476	q1_ao_17_e1_10_99_0002_36_0040
-4223.55	34.294	-45.448	4.007	0.476	q1_ao_18_e1_5_24_0002_41_0022
-4215.19	23.901	-38.491	3.725	0.476	q1_ao_18_e1_5_24_0002_41_0025
-4199.07	26.264	-49.978	3.676	0.476	q1_ao_1_e1_10_39_0002_49_0017
-4264.33	29.047	-38.557	3.845	0.476	q1_ao_3_e1_3_77_0001_67_0006
-4242.69	11.335	-68.237	3.981	0.476	q1_ao_4_e1_4_14_0002_73_0040
-4212.4	22.775	-47.145	3.902	0.476	q1_ao_4_e1_5_46_0001_74_0009
-4214.72	22.531	-49.695	3.95	0.476	q1_ao_4_e1_5_46_0001_74_0032
-4218.39	20.658	-47.457	3.926	0.476	q1_ao_4_e1_5_46_0001_74_0035
-4227.53	23.42	-56.418	3.652	0.476	q1_ao_4_e1_5_91_0002_74_0025
-4203.25	3.202	-53.237	3.671	0.476	q1_ao_10_e1_1_34_0001_1_0019_1_0035_0001
-4200.74	7.933	-39.153	3.408	0.476	q1_ao_10_e1_1_34_0001_1_0025_1_0026_0001
-4244.67	4.009	-53.589	3.618	0.476	q1_ao_14_e1_1_8_0002_20_0014_24_0002_0001
-4244.7	3.873	-51.986	3.614	0.476	q1_ao_14_e1_1_8_0002_20_0014_24_0037_0001
-4241.48	3.638	-48.768	3.675	0.476	q1_ao_14_e1_1_8_0002_20_0015_24_0006_0001
-4235	9.475	-43.126	3.578	0.476	q1_ao_14_e1_1_8_0002_20_0023_24_0021_0001
-4228.29	26.997	-55.62	4.011	0.476	q1_ao_17_e1_10_99_0002_36_0013_41_0007_0001
-4220.33	24.7	-50.041	3.921	0.476	q1_ao_17_e1_10_99_0002_36_0013_41_0039_0001
-4243.79	4.359	-57.181	3.566	0.476	q1_ao_19_e1_1_36_0002_44_0032_49_0005_0001
-4227.39	3.615	-48.688	3.429	0.476	q1_ao_19_e1_8_74_0001_47_0026_53_0030_0001
-4261.49	4.915	-54.984	3.611	0.476	q1_ao_20_e1_6_47_0002_55_0018_57_0012_0001
-4258.74	5.11	-54.663	3.588	0.476	q1_ao_20_e1_6_47_0002_55_0018_57_0021_0001
-4244.78	3.734	-34.224	3.886	0.476	q1_ao_20_e1_6_47_0002_55_0018_57_0026_0001
-4261.64	4.975	-54.585	3.591	0.476	q1_ao_20_e1_6_47_0002_55_0018_57_0034_0001
-4259.99	4.753	-55.921	3.739	0.476	q1_ao_20_e1_6_47_0002_55_0018_57_0040_0001
-4250.03	6.517	-47.645	3.662	0.476	q1_ao_20_e1_9_50_0002_58_0015_61_0022_0001
-4250.57	33.232	-35.37	3.804	0.476	q1_ao_2_e1_10_66_0001_59_0013_63_0024_0001
-4276.16	6.391	-64.846	3.955	0.476	q1_ao_3_e1_7_92_0002_70_0023_71_0008_0001
-4244.43	11.18	-71.464	3.993	0.476	q1_ao_4_e1_4_14_0002_73_0040_74_0015_0001
-4214.43	20.556	-47.893	3.9	0.476	q1_ao_4_e1_5_46_0001_74_0009_75_0026_0001
-4212.94	22.01	-48.246	3.983	0.476	q1_ao_4_e1_5_46_0001_74_0032_75_0010_0001
-4219.75	21.635	-49.35	3.977	0.476	q1_ao_4_e1_5_46_0001_74_0032_75_0023_0001
-4222.07	21.635	-48.786	3.928	0.476	q1_ao_4_e1_5_46_0001_74_0035_75_0031_0001
-4222.94	24.739	-51.079	3.873	0.476	q1_ao_4_e1_5_91_0002_74_0010_75_0034_0001
-4225.93	18.391	-58.422	3.982	0.476	q1_ao_4_e1_5_91_0002_74_0023_75_0027_0001
-4253.28	25.035	-44.416	3.94	0.476	q1_ao_9_e1_5_78_0002_96_0034_96_0037_0001
-4267.83	17.176	-57.508	3.919	0.476	q1_ao_9_e1_6_14_0002_96_0004_96_0018_0001
-4271.58	15.688	-57.093	3.875	0.476	q1_ao_9_e1_6_14_0002_96_0004_96_0022_0001
-4246.4	3.714	-53.177	3.63	0.476	q1_ao_14_e1_1_8_0002_20_0014_24_0002_10_0009
-4245.87	3.954	-52.814	3.634	0.476	q1_ao_14_e1_1_8_0002_20_0014_24_0002_10_0016
-4244.52	3.59	-51.625	3.647	0.476	q1_ao_14_e1_1_8_0002_20_0014_24_0005_11_0004
-4245.06	3.925	-54.967	3.641	0.476	q1_ao_14_e1_1_8_0002_20_0014_24_0005_11_0011
-4245.06	3.876	-53.076	3.624	0.476	q1_ao_14_e1_1_8_0002_20_0014_24_0005_11_0013
-4244.03	3.884	-53.089	3.621	0.476	q1_ao_14_e1_1_8_0002_20_0014_24_0005_11_0026
-4244.83	3.301	-52.026	3.611	0.476	q1_ao_14_e1_1_8_0002_20_0014_24_0005_11_0035
-4244.75	3.87	-52.26	3.677	0.476	q1_ao_14_e1_1_8_0002_20_0014_24_0010_11_0005
-4244.54	3.808	-53.221	3.669	0.476	q1_ao_14_e1_1_8_0002_20_0014_24_0010_11_0009
-4246.02	3.811	-52.816	3.658	0.476	q1_ao_14_e1_1_8_0002_20_0014_24_0010_11_0015
-4247.43	3.848	-54.182	3.661	0.476	q1_ao_14_e1_1_8_0002_20_0014_24_0010_11_0019
-4242.05	3.88	-54.411	3.663	0.476	q1_ao_14_e1_1_8_0002_20_0014_24_0010_11_0028
-4245.81	3.828	-52.897	3.639	0.476	q1_ao_14_e1_1_8_0002_20_0014_24_0010_11_0030
-4245.25	3.812	-55.458	3.659	0.476	q1_ao_14_e1_1_8_0002_20_0014_24_0010_11_0038
-4244.67	3.884	-54.542	3.63	0.476	q1_ao_14_e1_1_8_0002_20_0014_24_0028_11_0022
-4243.74	3.848	-58.638	3.623	0.476	q1_ao_14_e1_1_8_0002_20_0014_24_0037_11_0009
-4241.66	3.725	-51.954	3.625	0.476	q1_ao_14_e1_1_8_0002_20_0014_24_0037_11_0011
-4245.12	3.843	-53.75	3.642	0.476	q1_ao_14_e1_1_8_0002_20_0014_24_0037_11_0012
-4243.31	3.963	-60.689	3.614	0.476	q1_ao_14_e1_1_8_0002_20_0014_24_0037_11_0019
-4243.31	3.892	-53.133	3.62	0.476	q1_ao_14_e1_1_8_0002_20_0014_24_0037_11_0030
-4246.98	3.891	-55.048	3.629	0.476	q1_ao_14_e1_1_8_0002_20_0014_24_0037_11_0034
-4240.66	3.682	-52.789	3.626	0.476	q1_ao_14_e1_1_8_0002_20_0014_24_0037_11_0039
-4239.65	8.291	-46.983	3.635	0.476	q1_ao_14_e1_1_8_0002_20_0015_24_0004_11_0022
-4235.8	3.708	-51.986	3.63	0.476	q1_ao_14_e1_1_8_0002_20_0015_24_0006_12_0007
-4242.82	3.685	-50.352	3.657	0.476	q1_ao_14_e1_1_8_0002_20_0015_24_0006_12_0017
-4242.68	3.699	-50.546	3.691	0.476	q1_ao_14_e1_1_8_0002_20_0015_24_0006_12_0026
-4244.44	3.857	-52.09	3.775	0.476	q1_ao_14_e1_1_8_0002_20_0015_24_0006_12_0036
-4247.97	3.81	-57.613	3.616	0.476	q1_ao_14_e1_1_8_0002_20_0016_24_0013_12_0033
-4246.97	3.783	-53.787	3.629	0.476	q1_ao_14_e1_1_8_0002_20_0023_24_0005_12_0008
-4246.59	3.756	-54.075	3.644	0.476	q1_ao_14_e1_1_8_0002_20_0023_24_0005_12_0017
-4250.65	3.731	-62.646	3.57	0.476	q1_ao_14_e1_1_8_0002_20_0023_24_0005_12_0032
-4252.12	3.804	-57.11	3.623	0.476	q1_ao_14_e1_1_8_0002_20_0023_24_0005_12_0038
-4244.45	4.026	-53.789	3.569	0.476	q1_ao_14_e1_1_8_0002_20_0023_24_0010_13_0039
-4232.26	2.487	-49.164	3.631	0.476	q1_ao_14_e1_1_8_0002_20_0023_24_0016_13_0039
-4253.83	3.723	-57.901	3.635	0.476	q1_ao_14_e1_1_8_0002_20_0023_24_0018_13_0007
-4247.96	3.717	-54.389	3.654	0.476	q1_ao_14_e1_1_8_0002_20_0023_24_0018_13_0009
-4249.72	3.952	-54.763	3.557	0.476	q1_ao_14_e1_1_8_0002_20_0023_24_0028_13_0016
-4244.85	3.865	-53.223	3.659	0.476	q1_ao_14_e1_1_8_0002_20_0023_24_0029_13_0032
-4237.31	3.619	-42.843	3.614	0.476	q1_ao_14_e1_1_8_0002_20_0038_24_0018_14_0017
-4247.92	25.173	-48.125	3.792	0.476	q1_ao_14_e1_5_5_0001_23_0017_25_0006_14_0037
-4204.33	2.995	-55.15	3.694	0.476	q1_ao_10_e1_1_36_0002_1_0026_2_0023_2_0027
-4251.18	18.566	-51.585	3.897	0.476	q1_ao_15_e1_3_69_0002_29_0030_32_0033_31_0037
-4219.09	7.646	-53.69	3.545	0.476	q1_ao_16_e1_4_67_0002_33_0005_37_0003_33_0033
-4211.29	12.382	-53.275	3.444	0.476	q1_ao_16_e1_4_67_0002_33_0005_37_0019_33_0030
-4210.18	10.826	-48.83	3.46	0.476	q1_ao_16_e1_4_67_0002_33_0005_37_0024_33_0014
-4208.13	12.469	-45.836	3.495	0.476	q1_ao_16_e1_4_67_0002_33_0005_37_0024_33_0016
-4212	7.271	-53.098	3.518	0.476	q1_ao_16_e1_4_67_0002_33_0005_37_0028_34_0020
-4222.7	7.736	-59.021	3.439	0.476	q1_ao_16_e1_4_67_0002_33_0005_37_0033_34_0009
-4215.15	7.798	-57.54	3.496	0.476	q1_ao_16_e1_4_67_0002_33_0005_37_0033_34_0015
-4217.42	7.708	-58.395	3.488	0.476	q1_ao_16_e1_4_67_0002_33_0005_37_0033_34_0035
-4219.15	7.697	-58.198	3.436	0.476	q1_ao_16_e1_4_67_0002_33_0005_37_0033_34_0036
-4245.18	4.135	-61.937	3.555	0.476	q1_ao_19_e1_1_36_0002_44_0032_49_0005_37_0021
-4228.79	3.113	-50.528	3.636	0.476	q1_ao_19_e1_1_36_0002_44_0032_49_0012_37_0026
-4230.04	5.289	-45.686	3.61	0.476	q1_ao_19_e1_8_74_0001_47_0035_53_0032_39_0022
-4242.26	3.957	-56.768	3.475	0.476	q1_ao_19_e1_8_74_0001_47_0040_53_0033_39_0031
-4206.82	3.399	-59.915	3.681	0.476	q1_ao_10_e1_1_36_0002_1_0026_2_0028_3_0034
-4210.73	3.191	-60.195	3.703	0.476	q1_ao_10_e1_1_36_0002_1_0026_2_0028_3_0039
-4255.81	24.242	-44.961	3.791	0.476	q1_ao_20_e1_5_91_0001_54_0013_57_0039_41_0035
-4249.68	4.848	-50.583	3.603	0.476	q1_ao_20_e1_6_47_0002_55_0018_57_0006_41_0004
-4255.01	4.827	-54.551	3.613	0.476	q1_ao_20_e1_6_47_0002_55_0018_57_0006_41_0015
-4254.22	4.791	-53.857	3.614	0.476	q1_ao_20_e1_6_47_0002_55_0018_57_0006_41_0022
-4254.85	4.841	-53.976	3.716	0.476	q1_ao_20_e1_6_47_0002_55_0018_57_0012_41_0011
-4260.29	4.951	-54.675	3.63	0.476	q1_ao_20_e1_6_47_0002_55_0018_57_0012_41_0012
-4259.84	5.023	-55.505	3.59	0.476	q1_ao_20_e1_6_47_0002_55_0018_57_0012_41_0016
-4257.96	5.124	-55.127	3.574	0.476	q1_ao_20_e1_6_47_0002_55_0018_57_0012_41_0022
-4260.93	4.909	-54.078	3.85	0.476	q1_ao_20_e1_6_47_0002_55_0018_57_0012_41_0030
-4260.09	4.93	-54.622	3.59	0.476	q1_ao_20_e1_6_47_0002_55_0018_57_0012_41_0031
-4255.3	4.601	-53.162	3.66	0.476	q1_ao_20_e1_6_47_0002_55_0018_57_0018_41_0021
-4261.44	4.765	-55.066	3.584	0.476	q1_ao_20_e1_6_47_0002_55_0018_57_0018_41_0028
-4256.28	4.943	-53.735	3.573	0.476	q1_ao_20_e1_6_47_0002_55_0018_57_0018_41_0038
-4259.23	4.929	-54.073	3.619	0.476	q1_ao_20_e1_6_47_0002_55_0018_57_0021_42_0029
-4258.61	5.171	-55.41	3.566	0.476	q1_ao_20_e1_6_47_0002_55_0018_57_0034_42_0003
-4257.45	5.438	-54.186	3.569	0.476	q1_ao_20_e1_6_47_0002_55_0018_57_0034_42_0004
-4262.23	4.813	-55.656	3.584	0.476	q1_ao_20_e1_6_47_0002_55_0018_57_0034_42_0015
-4258.7	5.785	-50.415	3.622	0.476	q1_ao_20_e1_6_47_0002_55_0018_57_0034_42_0031
-4256.31	5.251	-60.951	3.539	0.476	q1_ao_20_e1_6_47_0002_55_0018_57_0034_42_0032
-4256.95	4.689	-56.961	3.698	0.476	q1_ao_20_e1_6_47_0002_55_0018_57_0040_42_0014
-4248.53	4.765	-56.05	3.789	0.476	q1_ao_20_e1_6_47_0002_55_0018_57_0040_42_0017
-4230.92	11.633	-51.66	3.691	0.476	q1_ao_10_e1_8_68_0001_6_0020_14_0024_4_0028
-4254.26	5.014	-46.45	3.628	0.476	q1_ao_20_e1_9_50_0002_58_0015_61_0022_50_0016
-4255.26	7.19	-51.004	3.63	0.476	q1_ao_20_e1_9_50_0002_58_0015_61_0025_51_0024
-4257.32	5.5	-51.812	3.474	0.476	q1_ao_20_e1_9_50_0002_58_0015_61_0028_51_0036
-4274.97	7.486	-62.588	3.968	0.476	q1_ao_3_e1_7_92_0002_70_0019_71_0038_68_0007
-4286.5	6.213	-69.497	3.955	0.476	q1_ao_3_e1_7_92_0002_70_0023_71_0008_68_0026
-4232.43	3.015	-54.984	3.498	0.476	q1_ao_12_e1_8_81_0001_14_0025_20_0018_6_0018
-4221.62	5.236	-47.915	3.952	0.476	q1_ao_4_e1_10_58_0001_71_0024_72_0030_70_0031
-4249.59	3.672	-69.259	3.847	0.476	q1_ao_4_e1_10_58_0001_71_0026_72_0025_71_0003
-4251.49	3.535	-69.941	3.812	0.476	q1_ao_4_e1_10_58_0001_71_0026_72_0025_71_0019
-4243.97	5.17	-64.928	3.871	0.476	q1_ao_4_e1_10_58_0001_71_0026_72_0034_71_0008
-4242.82	5.182	-62.686	3.894	0.476	q1_ao_4_e1_10_58_0001_71_0026_72_0034_71_0030
-4235.92	5.803	-68.025	3.839	0.476	q1_ao_4_e1_4_14_0002_73_0013_74_0032_75_0040
-4231.72	13.024	-62.124	4.044	0.476	q1_ao_4_e1_4_14_0002_73_0016_74_0007_76_0009
-4241.11	11.201	-68.6	4.024	0.476	q1_ao_4_e1_4_14_0002_73_0016_74_0010_76_0021
-4239.67	14.492	-67.275	4.05	0.476	q1_ao_4_e1_4_14_0002_73_0030_74_0017_78_0003
-4239.03	14.384	-67.204	4.048	0.476	q1_ao_4_e1_4_14_0002_73_0030_74_0017_78_0015
-4239.36	14.237	-66.314	4.047	0.476	q1_ao_4_e1_4_14_0002_73_0030_74_0017_78_0031
-4245.02	11.031	-71.273	4.002	0.476	q1_ao_4_e1_4_14_0002_73_0040_74_0015_78_0025
-4217.1	21.076	-50.812	3.934	0.476	q1_ao_4_e1_5_46_0001_74_0009_75_0026_79_0002
-4217.82	20.925	-48.303	3.904	0.476	q1_ao_4_e1_5_46_0001_74_0009_75_0026_79_0033
-4214.72	22.299	-49.597	3.979	0.476	q1_ao_4_e1_5_46_0001_74_0032_75_0010_79_0032
-4220.67	21.061	-49.349	3.973	0.476	q1_ao_4_e1_5_46_0001_74_0032_75_0023_79_0002
-4219.11	20.931	-49.421	3.972	0.476	q1_ao_4_e1_5_46_0001_74_0032_75_0023_79_0028
-4210.81	20.855	-49.171	4.02	0.476	q1_ao_4_e1_5_46_0001_74_0032_75_0028_79_0013
-4224.11	21.919	-48.534	3.964	0.476	q1_ao_4_e1_5_46_0001_74_0035_75_0031_79_0001
-4245.26	4.074	-58.01	3.724	0.476	q1_ao_14_e1_1_39_0001_20_0027_23_0038_7_0021
-4221.37	25.155	-51.5	3.954	0.476	q1_ao_4_e1_5_91_0002_74_0010_75_0034_80_0008
-4227.35	24.725	-59.585	3.907	0.476	q1_ao_4_e1_5_91_0002_74_0010_75_0034_80_0022
-4214.32	26.578	-56.302	4.048	0.476	q1_ao_4_e1_5_91_0002_74_0034_75_0040_81_0033
-4231.72	8.727	-51.774	3.885	0.476	q1_ao_5_e1_1_10_0001_77_0032_79_0036_84_0004
-4267.82	2.071	-64.628	3.546	0.476	q1_ao_6_e1_8_53_0001_83_0017_85_0029_88_0008
-4263.59	2.02	-60.628	3.603	0.476	q1_ao_6_e1_8_53_0001_83_0017_85_0029_88_0009
-4216.88	10.945	-51.835	3.602	0.476	q1_ao_8_e1_1_23_0001_88_0004_91_0027_89_0002
-4257.82	7.269	-60.509	3.641	0.476	q1_ao_14_e1_1_67_0001_20_0036_23_0017_8_0005
-4236.31	5.102	-60.818	3.592	0.476	q1_ao_8_e1_8_33_0002_92_0018_94_0005_93_0036
-4259.5	7.666	-53.291	3.538	0.476	q1_ao_9_e1_3_65_0001_94_0040_95_0028_94_0010
-4256.5	8.485	-55.819	3.681	0.476	q1_ao_9_e1_3_65_0001_94_0040_95_0038_94_0030
-4263.61	4.675	-59.383	3.887	0.476	q1_ao_9_e1_5_78_0002_96_0015_96_0021_95_0026
-4272.57	16.683	-59.442	3.902	0.476	q1_ao_9_e1_6_14_0002_96_0004_96_0015_95_0012
-4270.91	17.68	-60.221	3.891	0.476	q1_ao_9_e1_6_14_0002_96_0004_96_0017_95_0018
-4233.61	4.852	-49.27	3.539	0.476	q1_ao_14_e1_1_8_0002_20_0011_23_0004_9_0002
-4230.44	4.803	-49.403	3.598	0.476	q1_ao_14_e1_1_8_0002_20_0011_23_0004_9_0015
-4199.83	17.745	-36.743	3.415	0.464	q1_ao_16_e1_6_70_0002
-4209.74	35.147	-52.867	3.999	0.464	q1_ao_13_e1_5_79_0002
-4230.14	33.329	-48.522	3.92	0.464	q1_ao_5_e1_5_79_0001
-4220.85	23.908	-50.369	4.078	0.464	q1_ao_10_e1_10_5_0001_1_0037
-4204.34	21.124	-39.08	3.654	0.464	q1_ao_16_e1_4_67_0002_33_0023
-4208.65	17.601	-39.059	3.415	0.464	q1_ao_16_e1_6_70_0002_34_0019
-4219.31	34.24	-41.932	4.036	0.464	q1_ao_18_e1_5_24_0002_41_0021
-4257.71	6.86	-49.271	3.655	0.464	q1_ao_20_e1_9_50_0002_58_0015
-4265.93	9.337	-45.063	3.666	0.464	q1_ao_3_e1_3_14_0001_66_0040
-4221.45	10.779	-61.318	4.107	0.464	q1_ao_4_e1_4_14_0002_73_0016
-4211.18	21.503	-46.476	4.082	0.464	q1_ao_4_e1_5_91_0002_74_0004
-4216.35	20.633	-46.736	4.093	0.464	q1_ao_4_e1_5_91_0002_74_0010
-4214.15	24.593	-51.588	4.157	0.464	q1_ao_4_e1_5_91_0002_74_0034
-4263.07	21.798	-47.113	3.985	0.464	q1_ao_11_e1_5_53_0001_9_0027
-4252.41	2.06	-50.998	3.472	0.464	q1_ao_9_e1_8_69_0002_99_0006_100_0032_0001
-4214.49	11.611	-50.471	3.67	0.464	q1_ao_10_e1_8_68_0001_6_0020_14_0024_0001
-4256.32	14.154	-37.182	3.281	0.464	q1_ao_11_e1_5_53_0001_9_0027_16_0022_0001
-4213.72	2.696	-56.842	3.566	0.464	q1_ao_10_e1_1_34_0001_1_0010_1_0019_0001
-4229.04	3.347	-51.182	3.515	0.464	q1_ao_12_e1_8_81_0001_14_0025_20_0018_0001
-4250.85	8.109	-52.53	3.613	0.464	q1_ao_14_e1_1_67_0001_20_0036_23_0017_0001
-4248.29	7.811	-49.549	3.583	0.464	q1_ao_14_e1_1_67_0001_20_0036_23_0039_0001
-4241.24	3.188	-50.652	3.623	0.464	q1_ao_14_e1_1_8_0002_20_0014_24_0005_0001
-4242.77	3.934	-50.901	3.619	0.464	q1_ao_14_e1_1_8_0002_20_0014_24_0028_0001
-4254.4	26.712	-49.688	3.92	0.464	q1_ao_14_e1_5_5_0001_23_0039_25_0009_0001
-4243.24	19.056	-43.886	3.874	0.464	q1_ao_15_e1_3_69_0002_29_0030_32_0018_0001
-4222.21	28.841	-53.01	3.944	0.464	q1_ao_17_e1_10_99_0002_36_0040_41_0008_0001
-4225.19	28.321	-54.734	4	0.464	q1_ao_17_e1_10_99_0002_36_0040_41_0033_0001
-4227.62	1.283	-45.174	3.663	0.464	q1_ao_19_e1_1_36_0002_44_0025_48_0022_0001
-4220.18	4.251	-51.972	3.609	0.464	q1_ao_19_e1_8_74_0001_47_0040_53_0033_0001
-4198.58	24.128	-49.145	3.916	0.464	q1_ao_1_e1_3_20_0001_49_0021_55_0025_0001
-4252.7	4.649	-53.322	3.585	0.464	q1_ao_20_e1_6_47_0002_55_0018_57_0006_0001
-4260.53	4.737	-54.457	3.591	0.464	q1_ao_20_e1_6_47_0002_55_0018_57_0018_0001
-4253.62	7.136	-48.597	3.686	0.464	q1_ao_20_e1_9_50_0002_58_0015_61_0025_0001
-4253.34	4.645	-49.635	3.596	0.464	q1_ao_20_e1_9_50_0002_58_0015_61_0028_0001
-4257.76	18.141	-51.106	3.849	0.464	q1_ao_2_e1_3_14_0001_59_0001_63_0008_0001
-4271.67	9.2	-52.088	3.654	0.464	q1_ao_3_e1_3_14_0001_66_0040_67_0033_0001
-4266.14	7.26	-44.539	3.74	0.464	q1_ao_3_e1_3_77_0001_67_0004_68_0035_0001
-4264.44	11.743	-58.368	3.97	0.464	q1_ao_3_e1_7_92_0002_70_0019_71_0038_0001
-4250.65	3.669	-68.985	3.833	0.464	q1_ao_4_e1_10_58_0001_71_0026_72_0025_0001
-4236.99	11.399	-64.022	4.076	0.464	q1_ao_4_e1_4_14_0002_73_0016_74_0010_0001
-4221.31	10.571	-62.205	4.082	0.464	q1_ao_4_e1_4_14_0002_73_0016_74_0032_0001
-4222.19	10.196	-67.163	3.946	0.464	q1_ao_4_e1_4_14_0002_73_0018_74_0001_0001
-4237.62	11.367	-64.642	4.054	0.464	q1_ao_4_e1_4_14_0002_73_0018_74_0002_0001
-4222.99	10.638	-63.607	4.05	0.464	q1_ao_4_e1_4_14_0002_73_0018_74_0029_0001
-4228.71	11.049	-61.752	4.113	0.464	q1_ao_4_e1_4_14_0002_73_0030_74_0003_0001
-4236.53	13.877	-64.037	4.046	0.464	q1_ao_4_e1_4_14_0002_73_0030_74_0017_0001
-4224.09	10.734	-62.417	4.054	0.464	q1_ao_4_e1_4_14_0002_73_0030_74_0024_0001
-4230.84	24.576	-56.244	3.727	0.464	q1_ao_4_e1_5_91_0002_74_0001_75_0038_0001
-4214.21	24.479	-52.286	4.104	0.464	q1_ao_4_e1_5_91_0002_74_0034_75_0040_0001
-4217.47	5.17	-59.238	3.539	0.464	q1_ao_8_e1_8_33_0002_92_0018_94_0006_0001
-4213.64	4.759	-52.506	3.553	0.464	q1_ao_8_e1_8_33_0002_92_0018_94_0013_0001
-4212.28	5.211	-51.072	3.548	0.464	q1_ao_8_e1_8_33_0002_92_0018_94_0029_0001
-4255.47	7.295	-54.135	3.605	0.464	q1_ao_9_e1_3_65_0001_94_0040_95_0004_0001
-4269.05	16.954	-59.761	3.925	0.464	q1_ao_9_e1_6_14_0002_96_0004_96_0002_0001
-4264.32	5.962	-50.62	3.831	0.464	q1_ao_9_e1_6_14_0002_96_0022_96_0026_0001
-4265.75	18.891	-50.47	3.788	0.464	q1_ao_9_e1_6_14_0002_96_0040_96_0027_0001
-4260.63	2.473	-62.184	3.543	0.464	q1_ao_9_e1_8_69_0002_99_0006_100_0011_100_0006
-4245.23	3.782	-57.524	3.636	0.464	q1_ao_14_e1_1_8_0002_20_0014_24_0010_11_0029
-4207.09	3.288	-57.036	3.701	0.464	q1_ao_10_e1_1_34_0001_1_0019_1_0035_1_0031
-4204.99	3.984	-57.04	3.588	0.464	q1_ao_10_e1_1_36_0002_1_0018_1_0002_1_0010
-4203.02	4.11	-53.979	3.608	0.464	q1_ao_10_e1_1_36_0002_1_0018_1_0002_1_0021
-4223.53	6.022	-56.476	3.67	0.464	q1_ao_10_e1_1_36_0002_1_0019_1_0032_2_0005
-4206.97	2.78	-54.925	3.7	0.464	q1_ao_10_e1_1_36_0002_1_0026_2_0023_2_0009
-4208.39	3.001	-60.897	3.642	0.464	q1_ao_10_e1_1_36_0002_1_0026_2_0023_2_0026
-4207.19	2.716	-60.104	3.692	0.464	q1_ao_10_e1_1_36_0002_1_0026_2_0027_2_0038
-4250.63	21.679	-51.37	3.917	0.464	q1_ao_15_e1_3_69_0002_29_0030_32_0033_31_0004
-4249.4	18.975	-52.522	3.868	0.464	q1_ao_15_e1_3_69_0002_29_0030_32_0033_31_0013
-4216.56	7.572	-46.883	3.676	0.464	q1_ao_16_e1_1_99_0001_32_0034_36_0010_32_0014
-4222.57	4.599	-55.178	3.688	0.464	q1_ao_16_e1_4_67_0002_33_0005_37_0003_33_0026
-4220.21	8.043	-52.856	3.529	0.464	q1_ao_16_e1_4_67_0002_33_0005_37_0003_33_0037
-4217.39	7.678	-55.126	3.54	0.464	q1_ao_16_e1_4_67_0002_33_0005_37_0014_33_0027
-4211.27	8.029	-51.608	3.495	0.464	q1_ao_16_e1_4_67_0002_33_0005_37_0019_33_0005
-4208.4	11.925	-49.484	3.437	0.464	q1_ao_16_e1_4_67_0002_33_0005_37_0024_33_0007
-4219.34	7.821	-52.576	3.506	0.464	q1_ao_16_e1_4_67_0002_33_0005_37_0026_34_0005
-4219.08	7.908	-55.178	3.508	0.464	q1_ao_16_e1_4_67_0002_33_0005_37_0026_34_0040
-4201.6	6.279	-43.384	3.547	0.464	q1_ao_16_e1_4_67_0002_33_0005_37_0027_34_0020
-4213.21	7.671	-52.963	3.586	0.464	q1_ao_16_e1_4_67_0002_33_0005_37_0027_34_0035
-4212.17	7.87	-56.38	3.503	0.464	q1_ao_16_e1_4_67_0002_33_0005_37_0028_34_0039
-4212.96	11.804	-47.122	3.463	0.464	q1_ao_16_e1_4_67_0002_33_0005_37_0030_34_0016
-4217.2	8.141	-55.04	3.448	0.464	q1_ao_16_e1_4_67_0002_33_0005_37_0033_34_0008
-4216.56	7.916	-56.815	3.468	0.464	q1_ao_16_e1_4_67_0002_33_0005_37_0033_34_0024
-4222.84	7.313	-60.282	4.013	0.464	q1_ao_16_e1_4_67_0002_33_0005_37_0038_34_0006
-4243.86	4.365	-56.639	3.584	0.464	q1_ao_19_e1_1_36_0002_44_0032_49_0005_37_0011
-4240.48	4.198	-55.972	3.583	0.464	q1_ao_19_e1_1_36_0002_44_0032_49_0005_37_0017
-4232.1	3.64	-50.009	3.551	0.464	q1_ao_19_e1_1_36_0002_44_0032_49_0030_37_0027
-4198.37	24.031	-51.827	3.938	0.464	q1_ao_1_e1_3_20_0001_49_0021_55_0025_40_0028
-4261.91	2.827	-59.636	3.279	0.464	q1_ao_20_e1_1_61_0001_53_0009_56_0038_41_0023
-4263.2	26.977	-49.393	3.972	0.464	q1_ao_20_e1_5_91_0001_54_0023_57_0035_41_0016
-4258.55	4.813	-55.787	3.605	0.464	q1_ao_20_e1_6_47_0002_55_0018_57_0006_41_0037
-4258.62	5.234	-53.837	3.586	0.464	q1_ao_20_e1_6_47_0002_55_0018_57_0012_41_0035
-4256.71	4.443	-53.605	3.6	0.464	q1_ao_20_e1_6_47_0002_55_0018_57_0018_41_0003
-4255.34	4.695	-55.009	3.62	0.464	q1_ao_20_e1_6_47_0002_55_0018_57_0021_42_0015
-4258.08	4.987	-54.862	3.572	0.464	q1_ao_20_e1_6_47_0002_55_0018_57_0021_42_0021
-4256.38	5.086	-54.35	3.568	0.464	q1_ao_20_e1_6_47_0002_55_0018_57_0021_42_0031
-4258.01	5.047	-53.906	3.612	0.464	q1_ao_20_e1_6_47_0002_55_0018_57_0021_42_0034
-4261.36	5.531	-56.056	3.566	0.464	q1_ao_20_e1_6_47_0002_55_0018_57_0031_42_0031
-4255.53	5.313	-49.939	3.662	0.464	q1_ao_20_e1_9_50_0002_58_0015_61_0022_50_0029
-4251.09	5.691	-46.569	3.64	0.464	q1_ao_20_e1_9_50_0002_58_0015_61_0025_51_0004
-4259.37	5.597	-53.663	3.663	0.464	q1_ao_20_e1_9_50_0002_58_0015_61_0025_51_0008
-4252.96	4.805	-50.926	3.599	0.464	q1_ao_20_e1_9_50_0002_58_0015_61_0028_51_0010
-4260.21	5.137	-53.106	3.565	0.464	q1_ao_20_e1_9_50_0002_58_0015_61_0028_51_0012
-4258.27	5.149	-51.375	3.575	0.464	q1_ao_20_e1_9_50_0002_58_0015_61_0028_51_0021
-4255.25	5.119	-51.927	3.597	0.464	q1_ao_20_e1_9_50_0002_58_0015_61_0028_51_0034
-4269.65	7.862	-58.492	3.659	0.464	q1_ao_2_e1_3_14_0001_59_0001_63_0004_51_0001
-4277.11	9.163	-57.088	3.674	0.464	q1_ao_3_e1_3_14_0001_66_0040_67_0033_54_0010
-4274.52	6.559	-56.255	3.67	0.464	q1_ao_3_e1_3_77_0001_67_0004_68_0015_55_0017
-4279.47	6.619	-68.779	3.948	0.464	q1_ao_3_e1_7_92_0002_70_0023_71_0001_68_0017
-4281.83	6.477	-71.204	3.986	0.464	q1_ao_3_e1_7_92_0002_70_0023_71_0008_68_0007
-4222.15	12.076	-59.132	4.201	0.464	q1_ao_4_e1_10_58_0001_71_0024_72_0022_70_0002
-4251.58	3.879	-69.31	3.845	0.464	q1_ao_4_e1_10_58_0001_71_0026_72_0025_71_0010
-4249.15	3.995	-67.818	3.809	0.464	q1_ao_4_e1_10_58_0001_71_0026_72_0025_71_0028
-4253.23	3.955	-69.793	3.811	0.464	q1_ao_4_e1_10_58_0001_71_0026_72_0025_71_0030
-4251.95	3.901	-69.374	3.812	0.464	q1_ao_4_e1_10_58_0001_71_0026_72_0025_71_0035
-4242.05	11.896	-66.877	4.005	0.464	q1_ao_4_e1_4_14_0002_73_0015_74_0009_76_0012
-4238.1	12.077	-61.814	3.972	0.464	q1_ao_4_e1_4_14_0002_73_0015_74_0029_76_0018
-4239.77	11.725	-65.325	3.998	0.464	q1_ao_4_e1_4_14_0002_73_0015_74_0029_76_0022
-4238.29	11.706	-63.467	4.086	0.464	q1_ao_4_e1_4_14_0002_73_0016_74_0010_76_0023
-4237.1	11.738	-63.291	4.088	0.464	q1_ao_4_e1_4_14_0002_73_0016_74_0010_76_0035
-4220.59	10.774	-60.69	4.066	0.464	q1_ao_4_e1_4_14_0002_73_0016_74_0032_77_0005
-4235.84	11.35	-64.275	4.085	0.464	q1_ao_4_e1_4_14_0002_73_0016_74_0032_77_0008
-4235.49	11.385	-63.251	4.08	0.464	q1_ao_4_e1_4_14_0002_73_0016_74_0032_77_0027
-4224.64	10.942	-62.699	4.09	0.464	q1_ao_4_e1_4_14_0002_73_0016_74_0032_77_0029
-4233.96	11.478	-64.155	4.095	0.464	q1_ao_4_e1_4_14_0002_73_0016_74_0032_77_0034
-4227.04	10.53	-66.904	3.999	0.464	q1_ao_4_e1_4_14_0002_73_0018_74_0019_77_0011
-4233.55	11.496	-62.383	4.059	0.464	q1_ao_4_e1_4_14_0002_73_0030_74_0003_78_0030
-4238.85	14.699	-66.507	4.049	0.464	q1_ao_4_e1_4_14_0002_73_0030_74_0017_78_0008
-4237.23	14.432	-65.386	4.061	0.464	q1_ao_4_e1_4_14_0002_73_0030_74_0017_78_0017
-4237.42	14.725	-65.824	4.057	0.464	q1_ao_4_e1_4_14_0002_73_0030_74_0017_78_0025
-4234.17	11.438	-63.567	4.073	0.464	q1_ao_4_e1_4_14_0002_73_0030_74_0024_78_0005
-4222.55	10.762	-62.113	4.058	0.464	q1_ao_4_e1_4_14_0002_73_0030_74_0024_78_0012
-4231.53	11.067	-61.568	4.079	0.464	q1_ao_4_e1_4_14_0002_73_0030_74_0024_78_0031
-4225.81	10.903	-62.458	4.047	0.464	q1_ao_4_e1_4_14_0002_73_0030_74_0024_78_0038
-4225.07	11.399	-59.878	3.812	0.464	q1_ao_4_e1_4_14_0002_73_0040_74_0039_78_0009
-4228.08	12.147	-59.634	3.783	0.464	q1_ao_4_e1_4_14_0002_73_0040_74_0039_78_0022
-4231.43	11.775	-60.176	3.762	0.464	q1_ao_4_e1_4_14_0002_73_0040_74_0039_78_0023
-4226.69	12.009	-59.656	3.78	0.464	q1_ao_4_e1_4_14_0002_73_0040_74_0039_78_0027
-4219.45	21.408	-49.065	3.978	0.464	q1_ao_4_e1_5_46_0001_74_0032_75_0010_79_0012
-4251.18	7.649	-52.528	3.599	0.464	q1_ao_14_e1_1_67_0001_20_0036_23_0014_7_0011
-4228.81	12.77	-50.836	3.755	0.464	q1_ao_4_e1_5_91_0002_74_0010_75_0038_80_0003
-4219.64	22.401	-50.809	3.982	0.464	q1_ao_4_e1_5_91_0002_74_0023_75_0017_80_0030
-4208.14	29.739	-45.367	3.864	0.464	q1_ao_4_e1_5_91_0002_74_0023_75_0021_80_0034
-4216.14	25.87	-52.989	4.087	0.464	q1_ao_4_e1_5_91_0002_74_0034_75_0040_81_0019
-4247.9	12.152	-60.148	3.933	0.464	q1_ao_5_e1_1_10_0001_77_0032_79_0021_84_0001
-4249.81	8.051	-59.937	3.722	0.464	q1_ao_6_e1_8_53_0001_83_0017_85_0031_88_0030
-4222.5	8.694	-49.007	3.656	0.464	q1_ao_8_e1_1_23_0001_88_0031_91_0024_89_0004
-4247.47	7.267	-53.772	3.525	0.464	q1_ao_14_e1_1_67_0001_20_0036_23_0017_8_0007
-4248.97	8.229	-53.727	3.613	0.464	q1_ao_14_e1_1_67_0001_20_0036_23_0017_8_0010
-4248.54	8.207	-49.997	3.589	0.464	q1_ao_14_e1_1_67_0001_20_0036_23_0020_8_0021
-4233.71	5.17	-59.201	3.613	0.464	q1_ao_8_e1_8_33_0002_92_0018_94_0013_93_0015
-4232.67	5.03	-56.733	3.641	0.464	q1_ao_8_e1_8_33_0002_92_0018_94_0013_93_0023
-4217.54	5.065	-48.329	3.508	0.464	q1_ao_8_e1_8_33_0002_92_0018_94_0029_93_0015
-4257.47	7.306	-54.182	3.603	0.464	q1_ao_9_e1_3_65_0001_94_0040_95_0004_94_0024
-4244.26	7.488	-52.263	3.626	0.464	q1_ao_9_e1_3_65_0001_94_0040_95_0011_94_0034
-4252.49	7.623	-54.578	3.718	0.464	q1_ao_9_e1_3_65_0001_94_0040_95_0027_94_0007
-4259.49	7.956	-59.883	3.677	0.464	q1_ao_9_e1_3_65_0001_94_0040_95_0027_94_0021
-4257.61	7.94	-56.743	3.69	0.464	q1_ao_9_e1_3_65_0001_94_0040_95_0027_94_0026
-4257.59	7.231	-55.139	3.593	0.464	q1_ao_9_e1_3_65_0001_94_0040_95_0028_94_0030
-4268.66	16.755	-61.636	3.946	0.464	q1_ao_9_e1_6_14_0002_96_0004_96_0002_95_0018
-4273.66	16.376	-59.447	3.909	0.464	q1_ao_9_e1_6_14_0002_96_0004_96_0015_95_0005
-4266.68	15.706	-57.148	3.926	0.464	q1_ao_9_e1_6_14_0002_96_0004_96_0017_95_0009
-4267.87	18.084	-58.026	3.934	0.464	q1_ao_9_e1_6_14_0002_96_0004_96_0018_95_0001
-4262.72	6.223	-52.911	3.845	0.464	q1_ao_9_e1_6_14_0002_96_0022_96_0026_96_0011
-4266.8	5.34	-49.272	3.382	0.464	q1_ao_9_e1_6_14_0002_96_0040_96_0027_98_0005
-4264.08	18.222	-50.943	3.798	0.464	q1_ao_9_e1_6_14_0002_96_0040_96_0027_98_0020
-4250.72	2.645	-55.835	3.64	0.464	q1_ao_14_e1_1_8_0002_20_0004_23_0011_9_0039
-4221.52	10.85	-63.351	4.075	0.452	q1_ao_4_e1_4_14_0002
-4209.39	41.198	-44.165	3.912	0.452	q1_ao_10_e1_5_26_0002
-4200.81	25.198	-42.767	3.992	0.452	q1_ao_17_e1_5_63_0002
-4211.16	58.548	-38.548	4.016	0.452	q1_ao_18_e1_5_83_0002
-4216	25.559	-48.55	4.066	0.452	q1_ao_12_e1_5_100_0002_12_0039
-4226.24	25.95	-51.907	4.169	0.452	q1_ao_10_e1_10_5_0001_1_0012
-4216.41	26.385	-46.556	4.132	0.452	q1_ao_10_e1_10_5_0001_1_0032
-4206.93	4.034	-50.604	3.527	0.452	q1_ao_10_e1_1_36_0002_1_0018
-4209.03	18.152	-38.329	3.413	0.452	q1_ao_16_e1_6_70_0002_34_0005
-4208.72	18.855	-39.406	3.416	0.452	q1_ao_16_e1_6_70_0002_34_0017
-4220.32	26.266	-44.487	3.983	0.452	q1_ao_18_e1_5_24_0002_41_0008
-4226.23	27.923	-48.529	3.964	0.452	q1_ao_18_e1_5_24_0002_41_0010
-4227.15	26.244	-47.47	3.974	0.452	q1_ao_18_e1_5_24_0002_41_0014
-4257.73	5.777	-53.739	3.59	0.452	q1_ao_20_e1_6_47_0002_55_0018
-4210.36	7.785	-50.839	3.657	0.452	q1_ao_4_e1_1_7_0001_72_0024
-4226.69	10.77	-64.898	4.017	0.452	q1_ao_4_e1_4_14_0002_73_0013
-4233.22	11.5	-62.85	4.059	0.452	q1_ao_4_e1_4_14_0002_73_0015
-4224.91	10.684	-64.599	4.034	0.452	q1_ao_4_e1_4_14_0002_73_0018
-4222.21	10.784	-62.603	4.056	0.452	q1_ao_4_e1_4_14_0002_73_0030
-4207.23	21.573	-41.921	3.584	0.452	q1_ao_4_e1_4_72_0002_73_0009
-4216.92	20.037	-46.612	4.103	0.452	q1_ao_4_e1_5_91_0002_74_0001
-4221.34	12.052	-45.092	3.553	0.452	q1_ao_8_e1_1_23_0001_88_0002
-4207.26	28.94	-44.706	4.033	0.452	q1_ao_8_e1_5_22_0001_90_0037
-4212.3	5.004	-44.763	3.507	0.452	q1_ao_8_e1_8_33_0002_92_0018
-4217.93	6.524	-47.927	3.483	0.452	q1_ao_8_e1_8_61_0001_92_0025
-4258.22	17.99	-44.912	3.741	0.452	q1_ao_9_e1_6_14_0002_96_0022
-4257.25	20.25	-45.411	3.813	0.452	q1_ao_9_e1_6_14_0002_96_0040
-4237.53	1.865	-43.726	3.54	0.452	q1_ao_9_e1_8_69_0002_99_0006_100_0021_0001
-4261	21.916	-44.96	3.996	0.452	q1_ao_11_e1_5_53_0001_9_0027_16_0003_0001
-4205.35	2.768	-48.654	3.581	0.452	q1_ao_10_e1_1_34_0001_1_0019_1_0032_0001
-4205.98	4.068	-52.601	3.547	0.452	q1_ao_10_e1_1_36_0002_1_0018_1_0002_0001
-4223.11	12.188	-54.619	3.497	0.452	q1_ao_13_e1_4_60_0002_16_0018_20_0027_0001
-4202.13	12.681	-48.891	3.568	0.452	q1_ao_13_e1_4_60_0002_16_0018_20_0029_0001
-4247.33	8.104	-48.755	3.594	0.452	q1_ao_14_e1_1_67_0001_20_0036_23_0014_0001
-4244.85	8.02	-49.28	3.584	0.452	q1_ao_14_e1_1_67_0001_20_0036_23_0020_0001
-4244.92	11.304	-40.884	3.764	0.452	q1_ao_14_e1_9_22_0002_27_0020_29_0027_0001
-4210.67	2.719	-58.425	3.632	0.452	q1_ao_10_e1_1_36_0002_1_0026_2_0023_0001
-4232.02	18.586	-38.52	3.895	0.452	q1_ao_15_e1_3_69_0002_29_0030_32_0014_0001
-4240.85	19.038	-42.487	3.886	0.452	q1_ao_15_e1_3_69_0002_29_0030_32_0015_0001
-4236.09	19.484	-41.089	3.874	0.452	q1_ao_15_e1_3_69_0002_29_0030_32_0020_0001
-4250.54	18.795	-51.583	3.884	0.452	q1_ao_15_e1_3_69_0002_29_0030_32_0033_0001
-4241.68	18.717	-43.047	3.867	0.452	q1_ao_15_e1_3_69_0002_29_0030_32_0040_0001
-4219.86	7.832	-57.164	3.459	0.452	q1_ao_16_e1_4_67_0002_33_0005_37_0033_0001
-4224.59	4.152	-43.004	3.703	0.452	q1_ao_19_e1_1_36_0002_44_0032_49_0011_0001
-4253.21	5.186	-43.81	3.543	0.452	q1_ao_20_e1_9_50_0002_58_0015_61_0033_0001
-4253.54	6.346	-46.051	3.458	0.452	q1_ao_2_e1_10_66_0001_59_0036_63_0001_0001
-4257.67	14.737	-40.424	3.805	0.452	q1_ao_2_e1_10_66_0001_59_0036_63_0007_0001
-4263.65	8.651	-55.735	3.686	0.452	q1_ao_2_e1_3_14_0001_59_0001_63_0004_0001
-4270.53	8.251	-49.565	3.647	0.452	q1_ao_3_e1_3_14_0001_66_0040_67_0031_0001
-4265.79	6.908	-47.857	3.833	0.452	q1_ao_3_e1_3_77_0001_67_0004_68_0004_0001
-4267.15	6.936	-45.404	3.758	0.452	q1_ao_3_e1_3_77_0001_67_0004_68_0038_0001
-4201.69	8.293	-42.495	3.826	0.452	q1_ao_4_e1_1_7_0001_72_0010_73_0003_0001
-4217.13	7.277	-61.157	3.664	0.452	q1_ao_4_e1_1_7_0001_72_0024_73_0010_0001
-4204.29	6.816	-44.942	3.721	0.452	q1_ao_4_e1_1_7_0001_72_0036_73_0040_0001
-4234.07	12.099	-65.238	4.073	0.452	q1_ao_4_e1_4_14_0002_73_0015_74_0010_0001
-4237.93	11.548	-66.12	4.074	0.452	q1_ao_4_e1_4_14_0002_73_0015_74_0012_0001
-4240.1	11.926	-67.515	4.072	0.452	q1_ao_4_e1_4_14_0002_73_0015_74_0016_0001
-4241.01	11.589	-65.649	4.075	0.452	q1_ao_4_e1_4_14_0002_73_0015_74_0018_0001
-4239.45	11.551	-65.782	4.049	0.452	q1_ao_4_e1_4_14_0002_73_0015_74_0029_0001
-4222.86	10.582	-64.284	4.066	0.452	q1_ao_4_e1_4_14_0002_73_0016_74_0007_0001
-4216.01	10.476	-62.736	4.021	0.452	q1_ao_4_e1_4_14_0002_73_0018_74_0019_0001
-4233.27	11.557	-64.424	4.034	0.452	q1_ao_4_e1_4_14_0002_73_0018_74_0022_0001
-4240.14	11.752	-67.739	4.043	0.452	q1_ao_4_e1_4_14_0002_73_0030_74_0013_0001
-4213.36	23.977	-45.987	3.668	0.452	q1_ao_4_e1_4_72_0002_73_0009_74_0006_0001
-4220.22	21.699	-45.678	4.035	0.452	q1_ao_4_e1_5_91_0002_74_0010_75_0014_0001
-4243.81	12.093	-54.998	3.959	0.452	q1_ao_5_e1_1_10_0001_77_0032_79_0021_0001
-4231.29	8.866	-49.838	3.895	0.452	q1_ao_5_e1_1_10_0001_77_0032_79_0036_0001
-4244.96	6.866	-47.952	3.584	0.452	q1_ao_5_e1_8_97_0002_81_0028_82_0033_0001
-4251.3	7.354	-59.264	3.673	0.452	q1_ao_6_e1_8_53_0001_83_0017_85_0031_0001
-4209.23	11.651	-43.653	3.616	0.452	q1_ao_8_e1_1_23_0001_88_0002_91_0002_0001
-4216.31	12.308	-43.232	3.594	0.452	q1_ao_8_e1_1_23_0001_88_0002_91_0009_0001
-4218.9	12.116	-44.917	3.592	0.452	q1_ao_8_e1_1_23_0001_88_0002_91_0017_0001
-4216.89	12.12	-43.871	3.591	0.452	q1_ao_8_e1_1_23_0001_88_0002_91_0019_0001
-4217.73	11.558	-45.255	3.548	0.452	q1_ao_8_e1_1_23_0001_88_0002_91_0026_0001
-4220.02	12.292	-46.911	3.561	0.452	q1_ao_8_e1_1_23_0001_88_0002_91_0035_0001
-4218.05	12.707	-43.571	3.682	0.452	q1_ao_8_e1_1_23_0001_88_0002_91_0037_0001
-4216.92	11.744	-45.111	3.581	0.452	q1_ao_8_e1_1_23_0001_88_0002_91_0039_0001
-4216.68	10.698	-50.392	3.604	0.452	q1_ao_8_e1_1_23_0001_88_0004_91_0017_0001
-4213.76	10.749	-49.699	3.614	0.452	q1_ao_8_e1_1_23_0001_88_0004_91_0022_0001
-4217.69	10.678	-49.664	3.604	0.452	q1_ao_8_e1_1_23_0001_88_0004_91_0027_0001
-4224.39	7.975	-48.726	3.655	0.452	q1_ao_8_e1_1_23_0001_88_0031_91_0024_0001
-4222.71	5.872	-53.531	3.762	0.452	q1_ao_8_e1_8_33_0002_92_0008_94_0003_0001
-4215.83	5.574	-51.83	3.42	0.452	q1_ao_8_e1_8_33_0002_92_0018_94_0004_0001
-4216.67	5.454	-50.468	3.529	0.452	q1_ao_8_e1_8_33_0002_92_0018_94_0005_0001
-4220.58	5.534	-48.678	3.506	0.452	q1_ao_8_e1_8_61_0001_92_0025_94_0017_0001
-4245.36	8.133	-45.361	3.625	0.452	q1_ao_9_e1_3_65_0001_94_0015_95_0008_0001
-4251.94	8.029	-46.438	3.618	0.452	q1_ao_9_e1_3_65_0001_94_0040_95_0003_0001
-4247.88	7.502	-49.313	3.624	0.452	q1_ao_9_e1_3_65_0001_94_0040_95_0011_0001
-4257.06	7.592	-53.981	3.674	0.452	q1_ao_9_e1_3_65_0001_94_0040_95_0027_0001
-4250.9	7.187	-50.61	3.638	0.452	q1_ao_9_e1_3_65_0001_94_0040_95_0034_0001
-4256.76	18.361	-48.36	3.789	0.452	q1_ao_9_e1_6_14_0002_96_0022_96_0017_0001
-4261.77	18.043	-50.249	3.768	0.452	q1_ao_9_e1_6_14_0002_96_0022_96_0022_0001
-4262.72	18.859	-50.879	3.765	0.452	q1_ao_9_e1_6_14_0002_96_0022_96_0040_0001
-4257.59	18.634	-44.698	3.798	0.452	q1_ao_9_e1_6_14_0002_96_0040_96_0006_0001
-4259.12	18.723	-46.996	3.797	0.452	q1_ao_9_e1_6_14_0002_96_0040_96_0026_0001
-4257.41	2.413	-61.554	3.507	0.452	q1_ao_9_e1_8_69_0002_99_0006_100_0011_100_0002
-4257.55	2.464	-60.669	3.51	0.452	q1_ao_9_e1_8_69_0002_99_0006_100_0011_100_0004
-4261.77	2.422	-63.307	3.563	0.452	q1_ao_9_e1_8_69_0002_99_0006_100_0011_100_0033
-4251.25	2.032	-51.874	3.569	0.452	q1_ao_9_e1_8_69_0002_99_0006_100_0032_100_0036
-4240.73	3.274	-48.473	3.645	0.452	q1_ao_14_e1_1_8_0002_20_0038_24_0018_14_0033
-4209.7	3.34	-49.485	3.632	0.452	q1_ao_10_e1_1_34_0001_1_0019_1_0032_1_0030
-4231.18	5.732	-52.657	3.554	0.452	q1_ao_10_e1_1_36_0002_1_0019_1_0015_2_0027
-4223.76	6.166	-52.453	3.521	0.452	q1_ao_10_e1_1_36_0002_1_0019_1_0015_2_0039
-4234.82	5.936	-57.472	3.575	0.452	q1_ao_10_e1_1_36_0002_1_0019_1_0016_2_0007
-4218.21	6.21	-44.74	3.678	0.452	q1_ao_10_e1_1_36_0002_1_0019_1_0032_2_0006
-4216.97	6.142	-57.051	3.695	0.452	q1_ao_10_e1_1_36_0002_1_0019_1_0032_2_0010
-4226.44	2.999	-64.765	3.945	0.452	q1_ao_10_e1_1_36_0002_1_0026_2_0027_2_0035
-4226.3	4.813	-54.009	3.687	0.452	q1_ao_16_e1_1_99_0001_32_0034_36_0010_32_0001
-4218.67	11.8	-51.651	3.509	0.452	q1_ao_16_e1_4_67_0002_33_0005_37_0003_33_0001
-4208.82	4.332	-46.807	3.667	0.452	q1_ao_16_e1_4_67_0002_33_0005_37_0003_33_0035
-4206.96	4.276	-41.149	3.571	0.452	q1_ao_16_e1_4_67_0002_33_0005_37_0003_33_0039
-4208.43	10.347	-47.757	3.469	0.452	q1_ao_16_e1_4_67_0002_33_0005_37_0014_33_0005
-4220.8	7.842	-58.163	3.533	0.452	q1_ao_16_e1_4_67_0002_33_0005_37_0014_33_0006
-4207.65	9.982	-47.576	3.53	0.452	q1_ao_16_e1_4_67_0002_33_0005_37_0014_33_0024
-4206.65	11.628	-49.33	3.422	0.452	q1_ao_16_e1_4_67_0002_33_0005_37_0019_33_0007
-4210.63	9.396	-50.925	3.494	0.452	q1_ao_16_e1_4_67_0002_33_0005_37_0019_33_0013
-4212.02	11.112	-49.724	3.438	0.452	q1_ao_16_e1_4_67_0002_33_0005_37_0019_33_0021
-4205.91	4.185	-45.536	3.677	0.452	q1_ao_16_e1_4_67_0002_33_0005_37_0019_33_0023
-4205.88	13.043	-41.471	3.459	0.452	q1_ao_16_e1_4_67_0002_33_0005_37_0024_33_0009
-4206.11	10.126	-47.308	3.55	0.452	q1_ao_16_e1_4_67_0002_33_0005_37_0024_33_0012
-4206.97	11.841	-49.985	3.451	0.452	q1_ao_16_e1_4_67_0002_33_0005_37_0024_33_0020
-4218.39	7.881	-55.726	3.517	0.452	q1_ao_16_e1_4_67_0002_33_0005_37_0026_34_0008
-4218.59	7.912	-56.541	3.521	0.452	q1_ao_16_e1_4_67_0002_33_0005_37_0026_34_0018
-4217.42	8.179	-57.006	3.514	0.452	q1_ao_16_e1_4_67_0002_33_0005_37_0027_34_0007
-4216.01	10.566	-52.929	3.531	0.452	q1_ao_16_e1_4_67_0002_33_0005_37_0027_34_0021
-4214.08	7.672	-58.578	3.495	0.452	q1_ao_16_e1_4_67_0002_33_0005_37_0028_34_0035
-4209.46	11.577	-48.507	3.457	0.452	q1_ao_16_e1_4_67_0002_33_0005_37_0029_34_0002
-4215.57	7.954	-56.3	3.465	0.452	q1_ao_16_e1_4_67_0002_33_0005_37_0033_34_0010
-4218.37	7.705	-57.079	3.539	0.452	q1_ao_16_e1_4_67_0002_33_0005_37_0033_34_0013
-4219.66	7.814	-58.6	3.47	0.452	q1_ao_16_e1_4_67_0002_33_0005_37_0033_34_0018
-4216.52	7.579	-57.022	3.534	0.452	q1_ao_16_e1_4_67_0002_33_0005_37_0033_34_0021
-4220.12	7.677	-58.037	3.472	0.452	q1_ao_16_e1_4_67_0002_33_0005_37_0033_34_0028
-4216.84	41.511	-46.472	4.15	0.452	q1_ao_17_e1_10_99_0002_36_0013_41_0005_35_0031
-4229.02	8.66	-45.63	3.441	0.452	q1_ao_19_e1_1_36_0002_44_0032_49_0015_37_0004
-4245.75	4.968	-53.428	3.574	0.452	q1_ao_19_e1_1_36_0002_44_0032_49_0019_37_0006
-4199.84	3.819	-50.981	3.615	0.452	q1_ao_10_e1_1_36_0002_1_0026_2_0028_3_0014
-4258.56	4.062	-49.229	3.346	0.452	q1_ao_20_e1_1_61_0001_53_0009_56_0038_41_0038
-4257.42	4.926	-53.708	3.602	0.452	q1_ao_20_e1_6_47_0002_55_0018_57_0018_41_0014
-4255.52	4.728	-49.193	3.731	0.452	q1_ao_20_e1_6_47_0002_55_0018_57_0018_41_0016
-4226.08	11.83	-52.394	3.724	0.452	q1_ao_10_e1_8_68_0001_6_0020_14_0024_4_0027
-4259.23	6.1	-50.02	3.685	0.452	q1_ao_20_e1_9_50_0002_58_0015_61_0022_50_0012
-4260.73	3.41	-44.703	3.418	0.452	q1_ao_20_e1_9_50_0002_58_0015_61_0022_50_0031
-4231.72	10.155	-33.264	3.318	0.452	q1_ao_20_e1_9_50_0002_58_0015_61_0022_50_0039
-4254.27	5.438	-48.967	3.556	0.452	q1_ao_20_e1_9_50_0002_58_0015_61_0028_51_0008
-4270.79	8.997	-49.153	3.693	0.452	q1_ao_3_e1_3_14_0001_66_0040_67_0004_54_0014
-4269.19	9.28	-49.711	3.692	0.452	q1_ao_3_e1_3_14_0001_66_0040_67_0004_54_0029
-4272.16	9.332	-49.475	3.655	0.452	q1_ao_3_e1_3_14_0001_66_0040_67_0005_54_0025
-4267.91	9.403	-47.373	3.674	0.452	q1_ao_3_e1_3_14_0001_66_0040_67_0005_54_0027
-4270.92	8.816	-49.395	3.654	0.452	q1_ao_3_e1_3_14_0001_66_0040_67_0005_54_0031
-4270.85	9.323	-48.275	3.666	0.452	q1_ao_3_e1_3_14_0001_66_0040_67_0005_54_0039
-4271.55	8.028	-49.744	3.673	0.452	q1_ao_3_e1_3_14_0001_66_0040_67_0031_54_0002
-4268.53	8.241	-49.937	3.702	0.452	q1_ao_3_e1_3_14_0001_66_0040_67_0031_54_0005
-4272.35	8.141	-50.125	3.664	0.452	q1_ao_3_e1_3_14_0001_66_0040_67_0031_54_0009
-4269.47	8.187	-50.045	3.698	0.452	q1_ao_3_e1_3_14_0001_66_0040_67_0031_54_0015
-4273.74	7.942	-50.995	3.662	0.452	q1_ao_3_e1_3_14_0001_66_0040_67_0031_54_0022
-4273.69	10.274	-54.059	3.646	0.452	q1_ao_3_e1_3_14_0001_66_0040_67_0033_54_0012
-4271.53	9.542	-63.064	3.954	0.452	q1_ao_3_e1_7_92_0002_70_0019_71_0038_68_0005
-4271.79	8.686	-61.583	3.981	0.452	q1_ao_3_e1_7_92_0002_70_0019_71_0038_68_0018
-4270.6	9.074	-62.275	3.941	0.452	q1_ao_3_e1_7_92_0002_70_0019_71_0038_68_0023
-4275.63	6.337	-69.537	4.043	0.452	q1_ao_3_e1_7_92_0002_70_0023_71_0008_68_0018
-4273.15	6.652	-68.48	4.083	0.452	q1_ao_3_e1_7_92_0002_70_0023_71_0016_68_0038
-4216.27	11.79	-49.01	3.538	0.452	q1_ao_13_e1_4_60_0002_16_0018_20_0027_6_0004
-4223.78	12.211	-54.64	3.5	0.452	q1_ao_13_e1_4_60_0002_16_0018_20_0027_6_0008
-4222.91	12.464	-54.393	3.499	0.452	q1_ao_13_e1_4_60_0002_16_0018_20_0027_6_0013
-4224.46	12.439	-54.663	3.497	0.452	q1_ao_13_e1_4_60_0002_16_0018_20_0027_6_0019
-4223.07	12.451	-54.334	3.499	0.452	q1_ao_13_e1_4_60_0002_16_0018_20_0027_6_0022
-4221.49	12.625	-50.597	3.53	0.452	q1_ao_13_e1_4_60_0002_16_0018_20_0027_6_0028
-4222.62	12.419	-54.963	3.494	0.452	q1_ao_13_e1_4_60_0002_16_0018_20_0027_6_0031
-4210.65	11.644	-51.134	3.571	0.452	q1_ao_13_e1_4_60_0002_16_0018_20_0029_6_0037
-4217.82	12.258	-53.068	3.611	0.452	q1_ao_13_e1_4_60_0002_16_0018_20_0029_6_0039
-4217.61	12.241	-49.975	3.597	0.452	q1_ao_13_e1_4_60_0002_16_0018_20_0029_6_0040
-4250.77	5.233	-67.766	3.986	0.452	q1_ao_4_e1_10_58_0001_71_0026_72_0034_71_0036
-4219.69	7.28	-62.601	3.66	0.452	q1_ao_4_e1_1_7_0001_72_0024_73_0010_73_0004
-4219.59	7.222	-62.312	3.677	0.452	q1_ao_4_e1_1_7_0001_72_0024_73_0010_73_0016
-4224.71	8.208	-62.234	3.668	0.452	q1_ao_4_e1_1_7_0001_72_0024_73_0010_73_0017
-4221	6.978	-63.754	3.676	0.452	q1_ao_4_e1_1_7_0001_72_0024_73_0010_73_0025
-4219.29	7.065	-61.606	3.657	0.452	q1_ao_4_e1_1_7_0001_72_0024_73_0010_73_0030
-4220.33	7.32	-62.719	3.656	0.452	q1_ao_4_e1_1_7_0001_72_0024_73_0010_73_0032
-4220.9	7.036	-64.033	3.65	0.452	q1_ao_4_e1_1_7_0001_72_0024_73_0010_73_0033
-4220.99	7.008	-63.191	3.662	0.452	q1_ao_4_e1_1_7_0001_72_0024_73_0010_73_0036
-4223.28	10.726	-58.199	3.722	0.452	q1_ao_4_e1_1_7_0001_72_0024_73_0021_73_0025
-4209.66	5.605	-54.005	3.599	0.452	q1_ao_4_e1_1_7_0001_72_0025_73_0031_74_0004
-4204.95	5.202	-50.571	3.665	0.452	q1_ao_4_e1_1_7_0001_72_0025_73_0031_74_0009
-4225.91	17.63	-55.677	3.727	0.452	q1_ao_4_e1_4_14_0002_73_0013_74_0006_75_0019
-4236.72	12.098	-64.976	4.015	0.452	q1_ao_4_e1_4_14_0002_73_0015_74_0009_76_0001
-4233.24	12.165	-63.571	4.085	0.452	q1_ao_4_e1_4_14_0002_73_0015_74_0009_76_0019
-4237.47	11.833	-64.535	4.04	0.452	q1_ao_4_e1_4_14_0002_73_0015_74_0009_76_0021
-4233.29	12.333	-63.88	4.05	0.452	q1_ao_4_e1_4_14_0002_73_0015_74_0010_76_0012
-4228.37	5.163	-57.206	3.819	0.452	q1_ao_4_e1_4_14_0002_73_0015_74_0010_76_0014
-4236.26	11.896	-65.186	4.078	0.452	q1_ao_4_e1_4_14_0002_73_0015_74_0012_76_0009
-4239.46	11.43	-64.934	4.069	0.452	q1_ao_4_e1_4_14_0002_73_0015_74_0012_76_0012
-4237.03	11.148	-67.064	4.063	0.452	q1_ao_4_e1_4_14_0002_73_0015_74_0012_76_0018
-4236.8	12.033	-64.572	4.084	0.452	q1_ao_4_e1_4_14_0002_73_0015_74_0012_76_0021
-4223.07	6.625	-51.101	3.869	0.452	q1_ao_4_e1_4_14_0002_73_0015_74_0012_76_0022
-4240.24	12.121	-67.756	4.071	0.452	q1_ao_4_e1_4_14_0002_73_0015_74_0012_76_0028
-4237.71	12.099	-65.404	4.074	0.452	q1_ao_4_e1_4_14_0002_73_0015_74_0016_76_0022
-4236.45	11.318	-64.771	4.071	0.452	q1_ao_4_e1_4_14_0002_73_0015_74_0018_76_0023
-4234.86	11.866	-62.411	4.084	0.452	q1_ao_4_e1_4_14_0002_73_0015_74_0029_76_0007
-4241.23	11.789	-67.613	4.078	0.452	q1_ao_4_e1_4_14_0002_73_0015_74_0029_76_0014
-4242.01	11.509	-66.182	4.068	0.452	q1_ao_4_e1_4_14_0002_73_0015_74_0029_76_0023
-4236.91	14.68	-64.098	4.029	0.452	q1_ao_4_e1_4_14_0002_73_0015_74_0037_76_0020
-4234.94	12.047	-65.115	4.078	0.452	q1_ao_4_e1_4_14_0002_73_0016_74_0007_76_0019
-4236.09	11.538	-65.893	4.082	0.452	q1_ao_4_e1_4_14_0002_73_0016_74_0007_76_0020
-4242.2	12.021	-67.711	4.068	0.452	q1_ao_4_e1_4_14_0002_73_0016_74_0007_76_0035
-4235.39	11.97	-63.551	4.072	0.452	q1_ao_4_e1_4_14_0002_73_0016_74_0010_76_0014
-4238.94	11.731	-66.172	4.058	0.452	q1_ao_4_e1_4_14_0002_73_0016_74_0010_76_0027
-4222.22	7.234	-52.259	3.825	0.452	q1_ao_4_e1_4_14_0002_73_0018_74_0001_77_0017
-4237.57	11.61	-67.68	4.046	0.452	q1_ao_4_e1_4_14_0002_73_0018_74_0002_77_0019
-4240.9	11.317	-67.282	4.074	0.452	q1_ao_4_e1_4_14_0002_73_0018_74_0002_77_0025
-4238.58	11.786	-67.054	4.071	0.452	q1_ao_4_e1_4_14_0002_73_0018_74_0002_77_0029
-4236.41	12.248	-66.017	4.055	0.452	q1_ao_4_e1_4_14_0002_73_0018_74_0002_77_0032
-4224.4	10.337	-65.971	4.02	0.452	q1_ao_4_e1_4_14_0002_73_0018_74_0019_77_0038
-4242.37	11.789	-66.885	4.042	0.452	q1_ao_4_e1_4_14_0002_73_0018_74_0022_77_0006
-4229.14	14.853	-58.014	4.192	0.452	q1_ao_4_e1_4_14_0002_73_0018_74_0022_77_0010
-4242.16	11.785	-67.63	4.043	0.452	q1_ao_4_e1_4_14_0002_73_0018_74_0022_77_0011
-4239.64	11.711	-66.792	4.041	0.452	q1_ao_4_e1_4_14_0002_73_0018_74_0022_77_0021
-4241.02	12.002	-66.46	4.037	0.452	q1_ao_4_e1_4_14_0002_73_0018_74_0022_77_0028
-4234.11	11.505	-62.729	4.041	0.452	q1_ao_4_e1_4_14_0002_73_0018_74_0022_77_0033
-4216.69	10.881	-59.773	4.046	0.452	q1_ao_4_e1_4_14_0002_73_0018_74_0029_77_0001
-4224.68	11.589	-64.86	4.072	0.452	q1_ao_4_e1_4_14_0002_73_0018_74_0029_77_0006
-4240.03	11.707	-66.198	4.049	0.452	q1_ao_4_e1_4_14_0002_73_0030_74_0013_78_0037
-4240.17	14.379	-66.032	4.045	0.452	q1_ao_4_e1_4_14_0002_73_0030_74_0017_78_0006
-4235.56	14.743	-66.669	4.044	0.452	q1_ao_4_e1_4_14_0002_73_0030_74_0017_78_0013
-4239.33	14.414	-65.746	4.058	0.452	q1_ao_4_e1_4_14_0002_73_0030_74_0017_78_0037
-4225.56	10.792	-62.756	4.05	0.452	q1_ao_4_e1_4_14_0002_73_0030_74_0024_78_0008
-4222.1	10.666	-55.064	4.014	0.452	q1_ao_4_e1_4_14_0002_73_0040_74_0015_78_0034
-4235.94	6.02	-64.366	3.969	0.452	q1_ao_4_e1_4_14_0002_73_0040_74_0034_78_0006
-4223.77	12.017	-58.04	3.867	0.452	q1_ao_4_e1_4_14_0002_73_0040_74_0039_78_0014
-4227.55	12.28	-58.073	3.815	0.452	q1_ao_4_e1_4_14_0002_73_0040_74_0039_78_0019
-4207.65	5.898	-52.62	3.573	0.452	q1_ao_13_e1_8_83_0002_19_0020_22_0015_7_0040
-4234.33	18.959	-58.923	4.034	0.452	q1_ao_4_e1_5_91_0002_74_0023_75_0027_80_0002
-4222.36	18.719	-55.473	3.99	0.452	q1_ao_4_e1_5_91_0002_74_0023_75_0027_80_0040
-4219.16	23.556	-53.419	4.111	0.452	q1_ao_4_e1_5_91_0002_74_0034_75_0040_81_0004
-4240.08	10.858	-57.144	4.044	0.452	q1_ao_5_e1_1_10_0001_77_0032_79_0021_84_0009
-4249.32	11.646	-59.714	4.041	0.452	q1_ao_5_e1_1_10_0001_77_0032_79_0021_84_0011
-4246.59	11.88	-57.279	3.957	0.452	q1_ao_5_e1_1_10_0001_77_0032_79_0021_84_0014
-4244.36	12.247	-57.818	3.98	0.452	q1_ao_5_e1_1_10_0001_77_0032_79_0021_84_0026
-4248.5	11.746	-60.528	4.037	0.452	q1_ao_5_e1_1_10_0001_77_0032_79_0021_84_0027
-4244.24	12.09	-55.317	3.94	0.452	q1_ao_5_e1_1_10_0001_77_0032_79_0021_84_0033
-4236.29	5.302	-54.129	3.48	0.452	q1_ao_5_e1_1_55_0001_77_0017_79_0018_84_0015
-4247.23	7.008	-55.291	3.579	0.452	q1_ao_5_e1_8_97_0002_81_0028_82_0033_86_0007
-4246.92	6.748	-49.154	3.58	0.452	q1_ao_5_e1_8_97_0002_81_0028_82_0033_86_0011
-4238.62	6.043	-48.505	3.482	0.452	q1_ao_6_e1_8_53_0001_83_0001_85_0034_87_0018
-4240.2	6.092	-49.457	3.453	0.452	q1_ao_6_e1_8_53_0001_83_0001_85_0034_87_0026
-4251.43	2.291	-61.13	3.632	0.452	q1_ao_6_e1_8_53_0001_83_0017_85_0028_88_0002
-4240.9	1.974	-61.366	3.641	0.452	q1_ao_6_e1_8_53_0001_83_0017_85_0028_88_0015
-4257.45	1.779	-68.16	3.689	0.452	q1_ao_6_e1_8_53_0001_83_0017_85_0028_88_0018
-4259.4	2.332	-64.125	3.639	0.452	q1_ao_6_e1_8_53_0001_83_0017_85_0028_88_0029
-4256.23	1.567	-64.808	3.625	0.452	q1_ao_6_e1_8_53_0001_83_0017_85_0029_88_0015
-4241.48	8.443	-57.383	3.608	0.452	q1_ao_6_e1_8_53_0001_83_0029_85_0027_88_0015
-4243.2	8.452	-56.814	3.621	0.452	q1_ao_6_e1_8_53_0001_83_0029_85_0027_88_0036
-4223.23	11.093	-46.924	3.633	0.452	q1_ao_8_e1_1_23_0001_88_0004_91_0022_89_0027
-4229.47	7.842	-52.623	3.601	0.452	q1_ao_8_e1_1_23_0001_88_0031_91_0024_89_0018
-4225.31	7.933	-50.148	3.62	0.452	q1_ao_8_e1_1_23_0001_88_0031_91_0024_89_0019
-4246.7	8.686	-48.93	3.591	0.452	q1_ao_14_e1_1_67_0001_20_0036_23_0020_8_0005
-4246.85	8.596	-50.244	3.594	0.452	q1_ao_14_e1_1_67_0001_20_0036_23_0020_8_0027
-4246.84	7.985	-49.264	3.583	0.452	q1_ao_14_e1_1_67_0001_20_0036_23_0020_8_0031
-4242.16	8.521	-44.565	3.672	0.452	q1_ao_14_e1_1_67_0001_20_0036_23_0035_8_0006
-4224.89	5.858	-55.766	3.769	0.452	q1_ao_8_e1_8_33_0002_92_0008_94_0003_93_0028
-4228.59	5.094	-55.841	3.852	0.452	q1_ao_8_e1_8_33_0002_92_0008_94_0007_93_0012
-4227.33	5.531	-56.31	3.78	0.452	q1_ao_8_e1_8_33_0002_92_0008_94_0007_93_0014
-4214.6	5.804	-56.022	3.519	0.452	q1_ao_8_e1_8_33_0002_92_0018_94_0004_93_0025
-4222.2	4.959	-54.406	3.546	0.452	q1_ao_8_e1_8_33_0002_92_0018_94_0005_93_0024
-4218.94	4.877	-55.235	3.564	0.452	q1_ao_8_e1_8_33_0002_92_0018_94_0005_93_0028
-4223.91	4.599	-54.025	3.544	0.452	q1_ao_8_e1_8_33_0002_92_0018_94_0005_93_0039
-4229.23	5.961	-63.28	3.528	0.452	q1_ao_8_e1_8_33_0002_92_0018_94_0006_93_0001
-4219.98	5.383	-60.891	3.564	0.452	q1_ao_8_e1_8_33_0002_92_0018_94_0006_93_0023
-4222.26	5.428	-60.458	3.566	0.452	q1_ao_8_e1_8_33_0002_92_0018_94_0006_93_0025
-4217.16	5.472	-58.657	3.541	0.452	q1_ao_8_e1_8_33_0002_92_0018_94_0006_93_0040
-4232.94	5.292	-57.283	3.547	0.452	q1_ao_8_e1_8_33_0002_92_0018_94_0013_93_0029
-4231.22	5.549	-58.436	3.527	0.452	q1_ao_8_e1_8_33_0002_92_0018_94_0013_93_0030
-4224.77	5.267	-57.553	3.544	0.452	q1_ao_8_e1_8_33_0002_92_0018_94_0013_93_0033
-4214.9	5.27	-45.833	3.538	0.452	q1_ao_8_e1_8_33_0002_92_0018_94_0029_93_0002
-4211.5	5.594	-48.574	3.543	0.452	q1_ao_8_e1_8_33_0002_92_0018_94_0029_93_0033
-4213.29	5.48	-45.105	3.503	0.452	q1_ao_8_e1_8_61_0001_92_0025_94_0017_94_0032
-4218.25	5.445	-48.999	3.54	0.452	q1_ao_8_e1_8_61_0001_92_0025_94_0017_94_0034
-4227.81	5.409	-58.823	3.503	0.452	q1_ao_8_e1_8_61_0001_92_0025_94_0018_94_0003
-4229.3	5.548	-60.477	3.493	0.452	q1_ao_8_e1_8_61_0001_92_0025_94_0018_94_0010
-4259.68	7.39	-55.153	3.604	0.452	q1_ao_9_e1_3_65_0001_94_0040_95_0004_94_0010
-4256.59	7.267	-54.297	3.607	0.452	q1_ao_9_e1_3_65_0001_94_0040_95_0004_94_0013
-4250.18	7.072	-52.041	3.631	0.452	q1_ao_9_e1_3_65_0001_94_0040_95_0011_94_0004
-4249.15	7.106	-53.261	3.644	0.452	q1_ao_9_e1_3_65_0001_94_0040_95_0011_94_0026
-4249.49	7.12	-52.252	3.645	0.452	q1_ao_9_e1_3_65_0001_94_0040_95_0011_94_0029
-4249.21	7.146	-52.575	3.632	0.452	q1_ao_9_e1_3_65_0001_94_0040_95_0011_94_0033
-4254.08	7.842	-54.765	3.677	0.452	q1_ao_9_e1_3_65_0001_94_0040_95_0027_94_0011
-4258.89	7.337	-55.048	3.71	0.452	q1_ao_9_e1_3_65_0001_94_0040_95_0027_94_0014
-4250.46	7.811	-54.999	3.68	0.452	q1_ao_9_e1_3_65_0001_94_0040_95_0027_94_0029
-4260.49	7.639	-59.687	3.56	0.452	q1_ao_9_e1_3_65_0001_94_0040_95_0028_94_0002
-4256.04	7.891	-51.234	3.584	0.452	q1_ao_9_e1_3_65_0001_94_0040_95_0028_94_0019
-4242.6	7.638	-48.079	3.624	0.452	q1_ao_9_e1_3_65_0001_94_0040_95_0034_94_0009
-4244.72	7.384	-52.234	3.676	0.452	q1_ao_9_e1_3_65_0001_94_0040_95_0034_94_0014
-4254.74	7.39	-51.333	3.641	0.452	q1_ao_9_e1_3_65_0001_94_0040_95_0034_94_0029
-4247.87	8.571	-48.106	3.626	0.452	q1_ao_9_e1_3_65_0001_94_0040_95_0038_94_0035
-4262.96	5.243	-51.379	3.373	0.452	q1_ao_9_e1_6_14_0002_96_0022_96_0017_96_0024
-4265.25	17.851	-52.361	3.792	0.452	q1_ao_9_e1_6_14_0002_96_0022_96_0022_96_0031
-4254.67	18.569	-48.372	3.806	0.452	q1_ao_9_e1_6_14_0002_96_0022_96_0022_96_0035
-4263.83	18.684	-54.537	3.831	0.452	q1_ao_9_e1_6_14_0002_96_0040_96_0027_98_0031
-4267.63	18.143	-50.975	3.793	0.452	q1_ao_9_e1_6_14_0002_96_0040_96_0027_98_0034
-4214.72	27.915	-46.75	4.038	0.44	q1_ao_12_e1_5_100_0002
-4212.74	25.772	-44.096	4.072	0.44	q1_ao_10_e1_10_5_0001
-4252.63	20.088	-42.549	4.007	0.44	q1_ao_20_e1_5_91_0001
-4219.73	25.517	-48.068	4.08	0.44	q1_ao_12_e1_5_100_0002_12_0012
-4219.8	26.024	-49.289	4.079	0.44	q1_ao_12_e1_5_100_0002_12_0019
-4228.1	27.019	-51.963	4.037	0.44	q1_ao_12_e1_5_100_0002_12_0020
-4221.37	27.03	-51.012	4.074	0.44	q1_ao_12_e1_5_100_0002_12_0035
-4220.88	4.129	-45.306	3.482	0.44	q1_ao_12_e1_8_81_0001_14_0025
-4213.01	12.079	-45.624	3.505	0.44	q1_ao_13_e1_4_60_0002_16_0018
-4247.09	8.188	-47.657	3.597	0.44	q1_ao_14_e1_1_67_0001_20_0036
-4238.2	12.371	-43.461	3.533	0.44	q1_ao_14_e1_4_70_0001_23_0033
-4235.35	19.675	-41.396	3.85	0.44	q1_ao_15_e1_3_69_0002_29_0030
-4214.78	25.173	-54.304	3.969	0.44	q1_ao_17_e1_5_63_0002_37_0029
-4195.73	5.255	-41.478	3.344	0.44	q1_ao_1_e1_8_20_0001_51_0028
-4248.1	8.544	-40.968	3.62	0.44	q1_ao_20_e1_9_50_0002_58_0039
-4219.42	10.801	-46.156	3.614	0.44	q1_ao_8_e1_1_23_0001_88_0004
-4224.83	5.311	-52.352	3.6	0.44	q1_ao_8_e1_1_91_0001_88_0021
-4250.71	7.807	-47.343	3.622	0.44	q1_ao_9_e1_3_65_0001_94_0040
-4257.34	17.763	-44.71	3.791	0.44	q1_ao_9_e1_6_14_0002_96_0030
-4251.07	2.399	-50.555	3.539	0.44	q1_ao_9_e1_8_69_0002_99_0006_100_0011_0001
-4247.61	4.225	-43.623	3.592	0.44	q1_ao_9_e1_8_69_0002_99_0006_100_0024_0001
-4213.14	12.361	-48.919	3.532	0.44	q1_ao_13_e1_4_60_0002_16_0018_20_0014_0001
-4213.18	12.153	-48.489	3.532	0.44	q1_ao_13_e1_4_60_0002_16_0018_20_0023_0001
-4213.68	12.225	-48.346	3.517	0.44	q1_ao_13_e1_4_60_0002_16_0018_20_0028_0001
-4240.45	12.849	-45.717	3.529	0.44	q1_ao_14_e1_4_70_0001_23_0033_24_0005_0001
-4244.02	12.47	-47.042	3.535	0.44	q1_ao_14_e1_4_70_0001_23_0033_24_0022_0001
-4233.64	13.323	-40.312	3.533	0.44	q1_ao_14_e1_4_70_0001_23_0033_24_0035_0001
-4242.78	12.818	-45.425	3.519	0.44	q1_ao_14_e1_4_70_0001_23_0033_24_0040_0001
-4209.07	3.346	-55.972	3.63	0.44	q1_ao_10_e1_1_36_0002_1_0026_2_0020_0001
-4213.75	3.271	-64.36	3.736	0.44	q1_ao_10_e1_1_36_0002_1_0026_2_0027_0001
-4218.21	4.816	-45.298	3.504	0.44	q1_ao_16_e1_1_70_0002_32_0030_35_0038_0001
-4221.73	7.24	-50.24	3.706	0.44	q1_ao_16_e1_1_99_0001_32_0034_36_0022_0001
-4226.22	14.47	-55.562	4.095	0.44	q1_ao_16_e1_4_41_0002_33_0033_36_0032_0001
-4210.89	10.131	-49.343	3.485	0.44	q1_ao_16_e1_4_67_0002_33_0005_37_0026_0001
-4210.29	10.091	-49.379	3.52	0.44	q1_ao_16_e1_4_67_0002_33_0005_37_0027_0001
-4224.62	14.876	-37.963	3.524	0.44	q1_ao_19_e1_6_57_0001_46_0027_50_0005_0001
-4202.99	9.881	-54.947	3.645	0.44	q1_ao_1_e1_3_20_0001_49_0003_54_0038_0001
-4260.01	19.886	-52.693	3.966	0.44	q1_ao_2_e1_10_66_0001_59_0013_63_0040_0001
-4268.62	9.995	-47.765	3.686	0.44	q1_ao_3_e1_3_14_0001_66_0040_67_0004_0001
-4270.74	10.2	-46.975	3.713	0.44	q1_ao_3_e1_3_14_0001_66_0040_67_0023_0001
-4240.56	11.856	-65.03	4.037	0.44	q1_ao_4_e1_4_14_0002_73_0015_74_0009_0001
-4215.82	21.484	-45.774	4.111	0.44	q1_ao_4_e1_5_91_0002_74_0001_75_0020_0001
-4220.12	25.23	-51.296	3.783	0.44	q1_ao_4_e1_5_91_0002_74_0001_75_0021_0001
-4216	22.034	-45.467	4.099	0.44	q1_ao_4_e1_5_91_0002_74_0010_75_0037_0001
-4228.53	3.725	-39.52	3.519	0.44	q1_ao_6_e1_8_53_0001_83_0001_85_0015_0001
-4237.52	6.482	-49.164	3.493	0.44	q1_ao_6_e1_8_53_0001_83_0001_85_0034_0001
-4236.56	8.742	-50.704	3.579	0.44	q1_ao_6_e1_8_53_0001_83_0029_85_0027_0001
-4227.03	6.472	-52.978	3.661	0.44	q1_ao_8_e1_1_91_0001_88_0022_91_0019_0001
-4227.2	22.122	-47.688	3.639	0.44	q1_ao_8_e1_4_90_0001_90_0027_92_0011_0001
-4223.96	5.597	-55.605	3.513	0.44	q1_ao_8_e1_8_61_0001_92_0025_94_0018_0001
-4223.75	5.195	-52.481	3.534	0.44	q1_ao_8_e1_8_61_0001_92_0025_94_0026_0001
-4245.52	8.17	-44.157	3.614	0.44	q1_ao_9_e1_3_65_0001_94_0015_95_0016_0001
-4255.57	8.153	-46.002	3.622	0.44	q1_ao_9_e1_3_65_0001_94_0015_95_0037_0001
-4256.35	7.762	-52.1	3.606	0.44	q1_ao_9_e1_3_65_0001_94_0040_95_0028_0001
-4249.71	8.279	-47.991	3.616	0.44	q1_ao_9_e1_3_65_0001_94_0040_95_0038_0001
-4257.57	4.437	-58.036	3.81	0.44	q1_ao_9_e1_5_78_0002_96_0015_96_0021_0001
-4258.51	18.429	-46.833	3.804	0.44	q1_ao_9_e1_6_14_0002_96_0022_96_0038_0001
-4259.31	17.967	-48.571	3.796	0.44	q1_ao_9_e1_6_14_0002_96_0030_96_0019_0001
-4255.44	2.579	-55.564	3.523	0.44	q1_ao_9_e1_8_69_0002_99_0006_100_0011_100_0012
-4235.86	9.97	-51.309	3.554	0.44	q1_ao_10_e1_1_36_0002_1_0019_1_0003_2_0019
-4218.62	10.02	-45.502	3.572	0.44	q1_ao_10_e1_1_36_0002_1_0019_1_0014_2_0034
-4229.6	10.055	-44.135	3.565	0.44	q1_ao_10_e1_1_36_0002_1_0019_1_0015_2_0015
-4229.16	5.954	-52.286	3.584	0.44	q1_ao_10_e1_1_36_0002_1_0019_1_0015_2_0036
-4218.14	5.155	-46.249	3.434	0.44	q1_ao_10_e1_1_36_0002_1_0019_1_0016_2_0022
-4218.69	10.142	-47.638	3.576	0.44	q1_ao_10_e1_1_36_0002_1_0019_1_0034_2_0006
-4208.68	3.508	-58.755	3.603	0.44	q1_ao_10_e1_1_36_0002_1_0026_2_0020_2_0039
-4205.44	2.824	-54.283	3.652	0.44	q1_ao_10_e1_1_36_0002_1_0026_2_0023_2_0036
-4213.4	3.281	-62.84	3.696	0.44	q1_ao_10_e1_1_36_0002_1_0026_2_0027_2_0037
-4208.46	7.812	-49.197	3.678	0.44	q1_ao_16_e1_1_99_0001_32_0014_36_0001_31_0001
-4214.82	5.643	-61.242	3.489	0.44	q1_ao_16_e1_1_99_0001_32_0024_36_0035_32_0011
-4221.41	14.314	-54.813	4.081	0.44	q1_ao_16_e1_4_41_0002_33_0033_36_0032_33_0029
-4209.22	10.355	-49.046	3.54	0.44	q1_ao_16_e1_4_67_0002_33_0005_37_0003_33_0014
-4215.99	10.586	-50.166	3.52	0.44	q1_ao_16_e1_4_67_0002_33_0005_37_0003_33_0015
-4217.44	11.789	-51.128	3.525	0.44	q1_ao_16_e1_4_67_0002_33_0005_37_0003_33_0038
-4210.11	11.959	-50.122	3.435	0.44	q1_ao_16_e1_4_67_0002_33_0005_37_0011_33_0005
-4207.54	10.474	-46.473	3.532	0.44	q1_ao_16_e1_4_67_0002_33_0005_37_0014_33_0001
-4213.7	12.376	-50.329	3.426	0.44	q1_ao_16_e1_4_67_0002_33_0005_37_0024_33_0001
-4211.67	10.271	-50.18	3.494	0.44	q1_ao_16_e1_4_67_0002_33_0005_37_0024_33_0005
-4211.69	14.073	-49.056	3.434	0.44	q1_ao_16_e1_4_67_0002_33_0005_37_0024_33_0036
-4210.53	12.738	-49.979	3.456	0.44	q1_ao_16_e1_4_67_0002_33_0005_37_0024_33_0039
-4214.15	9.743	-50.22	3.488	0.44	q1_ao_16_e1_4_67_0002_33_0005_37_0026_34_0017
-4217.79	12.05	-51.692	3.44	0.44	q1_ao_16_e1_4_67_0002_33_0005_37_0027_34_0005
-4210.72	10.007	-49.251	3.527	0.44	q1_ao_16_e1_4_67_0002_33_0005_37_0027_34_0010
-4212.44	10.409	-50.092	3.505	0.44	q1_ao_16_e1_4_67_0002_33_0005_37_0027_34_0040
-4208.34	12.276	-48.033	3.493	0.44	q1_ao_16_e1_4_67_0002_33_0005_37_0029_34_0009
-4200.78	9.838	-43.706	3.593	0.44	q1_ao_16_e1_4_67_0002_33_0005_37_0029_34_0018
-4213.16	9.337	-50.698	3.578	0.44	q1_ao_16_e1_4_67_0002_33_0005_37_0029_34_0021
-4202.46	12.608	-46.54	3.486	0.44	q1_ao_16_e1_4_67_0002_33_0005_37_0030_34_0015
-4225.25	6.185	-52.126	3.472	0.44	q1_ao_19_e1_1_36_0002_44_0032_49_0012_37_0024
-4237.93	4.075	-53.698	3.593	0.44	q1_ao_19_e1_1_36_0002_44_0032_49_0015_37_0005
-4235.62	4.73	-48.398	3.924	0.44	q1_ao_19_e1_1_36_0002_44_0032_49_0019_37_0035
-4234.27	2.379	-46.889	3.576	0.44	q1_ao_19_e1_8_74_0001_47_0026_53_0030_39_0026
-4200.37	8.518	-57.979	3.731	0.44	q1_ao_1_e1_3_20_0001_49_0003_54_0001_39_0022
-4205.48	3.178	-59.949	3.709	0.44	q1_ao_10_e1_1_36_0002_1_0026_2_0028_3_0026
-4213.61	50.229	-40.456	3.892	0.44	q1_ao_10_e1_5_49_0002_3_0034_3_0037_3_0030
-4206.09	9.726	-57.33	3.617	0.44	q1_ao_1_e1_3_20_0001_49_0003_54_0038_40_0017
-4200.37	9.982	-56.608	3.612	0.44	q1_ao_1_e1_3_20_0001_49_0003_54_0038_40_0024
-4198.62	22.526	-55.504	3.958	0.44	q1_ao_1_e1_3_20_0001_49_0021_55_0025_40_0008
-4195.81	24.349	-46.362	3.85	0.44	q1_ao_1_e1_3_20_0001_49_0021_55_0029_40_0016
-4255.71	5.963	-51.863	3.643	0.44	q1_ao_20_e1_6_47_0002_55_0018_57_0012_41_0025
-4230.65	11.215	-52.705	3.704	0.44	q1_ao_10_e1_8_68_0001_6_0020_14_0024_4_0001
-4223.54	12.881	-52.415	3.648	0.44	q1_ao_10_e1_8_68_0001_6_0020_14_0024_4_0004
-4227.17	12.395	-52.354	3.666	0.44	q1_ao_10_e1_8_68_0001_6_0020_14_0024_4_0018
-4229.06	11.848	-50.104	3.681	0.44	q1_ao_10_e1_8_68_0001_6_0020_14_0024_4_0039
-4248.35	4.768	-43.738	3.683	0.44	q1_ao_20_e1_9_50_0002_58_0015_61_0022_50_0002
-4253.99	22.043	-52.148	3.982	0.44	q1_ao_2_e1_10_66_0001_59_0013_63_0040_51_0036
-4269.99	9.55	-48.947	3.667	0.44	q1_ao_3_e1_3_14_0001_66_0040_67_0004_54_0030
-4274.09	9.42	-49.371	3.659	0.44	q1_ao_3_e1_3_14_0001_66_0040_67_0004_54_0034
-4274.82	9.353	-50.05	3.666	0.44	q1_ao_3_e1_3_14_0001_66_0040_67_0004_54_0036
-4270.95	9.607	-48.542	3.67	0.44	q1_ao_3_e1_3_14_0001_66_0040_67_0005_54_0009
-4274.21	8.777	-50.199	3.654	0.44	q1_ao_3_e1_3_14_0001_66_0040_67_0005_54_0010
-4266.3	9.483	-48.086	3.683	0.44	q1_ao_3_e1_3_14_0001_66_0040_67_0005_54_0018
-4272.64	9.527	-49.277	3.665	0.44	q1_ao_3_e1_3_14_0001_66_0040_67_0005_54_0023
-4273.85	8.793	-50.794	3.666	0.44	q1_ao_3_e1_3_14_0001_66_0040_67_0005_54_0029
-4269.41	9.773	-48.056	3.696	0.44	q1_ao_3_e1_3_14_0001_66_0040_67_0032_54_0005
-4269.07	9.386	-47.257	3.678	0.44	q1_ao_3_e1_3_14_0001_66_0040_67_0032_54_0021
-4269.99	10.189	-48.11	3.692	0.44	q1_ao_3_e1_3_14_0001_66_0040_67_0032_54_0023
-4271.44	8.664	-50.211	3.684	0.44	q1_ao_3_e1_3_14_0001_66_0040_67_0032_54_0038
-4277.15	10.299	-55.02	3.676	0.44	q1_ao_3_e1_3_14_0001_66_0040_67_0033_54_0032
-4213.49	12.393	-50.588	3.526	0.44	q1_ao_13_e1_4_60_0002_16_0018_20_0014_6_0012
-4213.97	12.026	-49.304	3.566	0.44	q1_ao_13_e1_4_60_0002_16_0018_20_0027_6_0021
-4215.56	12.506	-48.133	3.618	0.44	q1_ao_13_e1_4_60_0002_16_0018_20_0027_6_0024
-4210.94	12.1	-50.28	3.53	0.44	q1_ao_13_e1_4_60_0002_16_0018_20_0028_6_0003
-4213	11.95	-50.341	3.528	0.44	q1_ao_13_e1_4_60_0002_16_0018_20_0028_6_0006
-4209.73	11.951	-50.389	3.533	0.44	q1_ao_13_e1_4_60_0002_16_0018_20_0028_6_0029
-4220.48	11.981	-53.74	3.529	0.44	q1_ao_13_e1_4_60_0002_16_0018_20_0028_6_0036
-4247.65	5.454	-67.619	4.012	0.44	q1_ao_4_e1_10_58_0001_71_0026_72_0034_71_0033
-4221.91	6.3	-46.158	3.837	0.44	q1_ao_4_e1_10_58_0001_71_0030_72_0002_71_0009
-4223.05	5.709	-63.906	3.826	0.44	q1_ao_4_e1_1_7_0001_72_0010_73_0005_73_0022
-4208.31	5.341	-49.392	3.743	0.44	q1_ao_4_e1_1_7_0001_72_0032_73_0035_74_0005
-4229.64	15.261	-60.885	4.003	0.44	q1_ao_4_e1_4_14_0002_73_0013_74_0006_75_0008
-4228.32	4.144	-71.66	4.071	0.44	q1_ao_4_e1_4_14_0002_73_0013_74_0006_75_0029
-4229.11	6.624	-56.944	3.861	0.44	q1_ao_4_e1_4_14_0002_73_0013_74_0012_75_0015
-4221.06	15.312	-55.059	3.772	0.44	q1_ao_4_e1_4_14_0002_73_0015_74_0010_76_0021
-4220.59	28.179	-54.103	3.863	0.44	q1_ao_4_e1_4_14_0002_73_0015_74_0010_76_0023
-4239.63	11.744	-64.149	4.086	0.44	q1_ao_4_e1_4_14_0002_73_0015_74_0016_76_0016
-4237.99	11.987	-64.061	4.088	0.44	q1_ao_4_e1_4_14_0002_73_0015_74_0016_76_0024
-4236.06	11.583	-63.472	4.08	0.44	q1_ao_4_e1_4_14_0002_73_0015_74_0018_76_0015
-4238.95	11.385	-64.52	3.976	0.44	q1_ao_4_e1_4_14_0002_73_0015_74_0018_76_0024
-4223.03	11.04	-63.685	3.969	0.44	q1_ao_4_e1_4_14_0002_73_0016_74_0007_76_0008
-4215.02	3.66	-48.648	3.791	0.44	q1_ao_4_e1_4_14_0002_73_0018_74_0001_77_0019
-4236.9	12.16	-66.291	4.069	0.44	q1_ao_4_e1_4_14_0002_73_0030_74_0013_78_0007
-4211.26	5.869	-45.26	3.475	0.44	q1_ao_4_e1_4_14_0002_73_0040_74_0015_78_0004
-4231.1	6.204	-66.115	3.89	0.44	q1_ao_4_e1_4_14_0002_73_0040_74_0040_78_0023
-4210.1	36.364	-44.487	4.128	0.44	q1_ao_4_e1_5_46_0001_74_0032_75_0010_79_0025
-4229.67	16.324	-53.873	3.976	0.44	q1_ao_4_e1_5_91_0002_74_0001_75_0027_79_0007
-4204.14	5.945	-51.747	3.586	0.44	q1_ao_13_e1_8_83_0002_19_0020_22_0015_7_0002
-4202.64	6.608	-52.87	3.582	0.44	q1_ao_13_e1_8_83_0002_19_0020_22_0015_7_0033
-4247.51	7.972	-49.053	3.584	0.44	q1_ao_14_e1_1_67_0001_20_0036_23_0014_7_0021
-4244.06	6.506	-45.048	3.65	0.44	q1_ao_14_e1_1_67_0001_20_0036_23_0014_7_0030
-4223.29	12.205	-46.618	3.783	0.44	q1_ao_4_e1_5_91_0002_74_0010_75_0038_80_0001
-4223.86	19.602	-52.513	4.146	0.44	q1_ao_4_e1_5_91_0002_74_0023_75_0021_80_0004
-4220.98	30.545	-52.174	4.088	0.44	q1_ao_4_e1_5_91_0002_74_0023_75_0034_81_0015
-4215.53	30.742	-49.041	3.939	0.44	q1_ao_4_e1_5_91_0002_74_0023_75_0034_81_0037
-4242.5	11.771	-56.94	3.969	0.44	q1_ao_5_e1_1_10_0001_77_0032_79_0021_84_0030
-4244.31	8.846	-52.849	3.928	0.44	q1_ao_5_e1_1_10_0001_77_0032_79_0036_84_0001
-4244.46	6.439	-48.75	3.481	0.44	q1_ao_6_e1_8_53_0001_83_0001_85_0034_87_0008
-4244.6	6.118	-50.142	3.491	0.44	q1_ao_6_e1_8_53_0001_83_0001_85_0034_87_0017
-4243.27	0.215	-60.739	3.634	0.44	q1_ao_6_e1_8_53_0001_83_0017_85_0009_87_0017
-4247.36	6.528	-50.856	3.551	0.44	q1_ao_6_e1_8_53_0001_83_0017_85_0017_87_0023
-4244.3	6.374	-48.872	3.527	0.44	q1_ao_6_e1_8_53_0001_83_0017_85_0017_87_0040
-4247.26	2.318	-59.587	3.708	0.44	q1_ao_6_e1_8_53_0001_83_0017_85_0029_88_0014
-4262.46	1.105	-61.315	3.79	0.44	q1_ao_6_e1_8_53_0001_83_0017_85_0029_88_0017
-4251.82	8.47	-58.601	3.666	0.44	q1_ao_6_e1_8_53_0001_83_0017_85_0031_88_0014
-4241.3	8.686	-58.217	3.657	0.44	q1_ao_6_e1_8_53_0001_83_0029_85_0027_88_0004
-4225.58	10.94	-50.633	3.7	0.44	q1_ao_8_e1_1_23_0001_88_0004_91_0012_88_0006
-4228.49	11.085	-53.637	3.7	0.44	q1_ao_8_e1_1_23_0001_88_0004_91_0012_88_0011
-4222.29	11.171	-52.261	3.741	0.44	q1_ao_8_e1_1_23_0001_88_0004_91_0012_88_0029
-4215.54	10.767	-50.364	3.593	0.44	q1_ao_8_e1_1_23_0001_88_0004_91_0017_88_0010
-4228.62	11.199	-52.055	3.722	0.44	q1_ao_8_e1_1_23_0001_88_0004_91_0027_89_0011
-4221.45	11.061	-47.957	3.74	0.44	q1_ao_8_e1_1_23_0001_88_0004_91_0027_89_0020
-4216.17	7.499	-55.093	3.684	0.44	q1_ao_8_e1_1_23_0001_88_0031_91_0024_89_0020
-4246.38	8.501	-50.048	3.593	0.44	q1_ao_14_e1_1_67_0001_20_0036_23_0035_8_0025
-4244.04	8.406	-47.297	3.592	0.44	q1_ao_14_e1_1_67_0001_20_0036_23_0035_8_0037
-4223.95	6.019	-55.954	3.826	0.44	q1_ao_8_e1_8_33_0002_92_0008_94_0003_93_0021
-4222.04	5.764	-54.818	3.769	0.44	q1_ao_8_e1_8_33_0002_92_0008_94_0003_93_0035
-4220.35	5.069	-55.449	3.561	0.44	q1_ao_8_e1_8_33_0002_92_0018_94_0005_93_0040
-4214.25	5.67	-46.105	3.559	0.44	q1_ao_8_e1_8_33_0002_92_0018_94_0029_93_0023
-4223.26	5.299	-54.826	3.492	0.44	q1_ao_8_e1_8_61_0001_92_0025_94_0003_93_0029
-4222.99	5.408	-53.067	3.604	0.44	q1_ao_8_e1_8_61_0001_92_0025_94_0018_94_0011
-4226.05	5.356	-55.623	3.494	0.44	q1_ao_8_e1_8_61_0001_92_0025_94_0018_94_0025
-4224.85	5.281	-54.97	3.5	0.44	q1_ao_8_e1_8_61_0001_92_0025_94_0018_94_0036
-4259.6	7.368	-53.506	3.647	0.44	q1_ao_9_e1_3_65_0001_94_0040_95_0004_94_0039
-4264.03	7.449	-57.121	3.738	0.44	q1_ao_9_e1_3_65_0001_94_0040_95_0011_94_0036
-4253.13	7.999	-53.959	3.716	0.44	q1_ao_9_e1_3_65_0001_94_0040_95_0027_94_0013
-4258.93	7.209	-53.602	3.578	0.44	q1_ao_9_e1_3_65_0001_94_0040_95_0028_94_0039
-4247.05	7.935	-48.317	3.638	0.44	q1_ao_9_e1_3_65_0001_94_0040_95_0038_94_0005
-4248.86	8.091	-47.735	3.691	0.44	q1_ao_9_e1_3_65_0001_94_0040_95_0038_94_0013
-4258.29	18.079	-50.057	3.83	0.44	q1_ao_9_e1_6_14_0002_96_0022_96_0017_96_0040
-4258.62	17.976	-49.022	3.794	0.44	q1_ao_9_e1_6_14_0002_96_0030_96_0019_98_0003
-4260.85	17.601	-50.254	3.826	0.44	q1_ao_9_e1_6_14_0002_96_0030_96_0019_98_0020
-4269.87	18.318	-54.741	3.834	0.44	q1_ao_9_e1_6_14_0002_96_0040_96_0027_98_0004
-4207.77	35.446	-39.443	3.615	0.429	q1_ao_16_e1_6_50_0001
-4225.3	5.277	-59.841	3.683	0.429	q1_ao_4_e1_1_7_0001
-4212.23	12.362	-37.06	3.482	0.429	q1_ao_13_e1_4_60_0002_16_0016
-4212.35	12.052	-37.421	3.473	0.429	q1_ao_13_e1_4_60_0002_16_0027
-4211	12.918	-37.555	3.467	0.429	q1_ao_13_e1_4_60_0002_16_0030
-4197.23	2.761	-42.668	3.584	0.429	q1_ao_10_e1_1_34_0001_1_0019
-4224.49	3.307	-60.502	3.704	0.429	q1_ao_10_e1_1_36_0002_1_0026
-4204.18	10.403	-47.309	3.562	0.429	q1_ao_16_e1_4_67_0002_33_0005
-4200.94	20.251	-40.213	3.761	0.429	q1_ao_16_e1_4_67_0002_33_0029
-4271.37	26.334	-42.903	3.884	0.429	q1_ao_3_e1_3_77_0001_67_0019
-4224.38	5.88	-42.358	3.495	0.429	q1_ao_10_e1_8_68_0001_6_0020
-4221.3	5.669	-60.212	3.703	0.429	q1_ao_4_e1_1_7_0001_72_0010
-4230.01	5.346	-61.975	3.714	0.429	q1_ao_4_e1_1_7_0001_72_0036
-4247.33	5.213	-63.014	3.709	0.429	q1_ao_5_e1_1_55_0001_77_0026
-4248.61	5.428	-62.59	3.799	0.429	q1_ao_5_e1_1_55_0001_77_0037
-4250.59	14.258	-33.849	3.535	0.429	q1_ao_11_e1_10_62_0001_7_0035
-4238.66	22.711	-37.682	3.861	0.429	q1_ao_6_e1_10_18_0002_81_0002
-4232.53	40.334	-29.731	3.473	0.429	q1_ao_6_e1_10_68_0001_81_0022
-4217.67	5.883	-37.729	3.681	0.429	q1_ao_8_e1_1_23_0001_88_0019
-4224.33	6.116	-50.58	3.661	0.429	q1_ao_8_e1_1_91_0001_88_0022
-4244.55	10.431	-42.961	3.649	0.429	q1_ao_9_e1_3_65_0001_94_0015
-4238	1.465	-42.862	3.801	0.429	q1_ao_9_e1_8_69_0002_99_0006_100_0030_0001
-4215.06	13.202	-38.212	3.664	0.429	q1_ao_10_e1_10_5_0001_1_0037_1_0033_0001
-4219	3.96	-45.64	3.489	0.429	q1_ao_12_e1_8_81_0001_14_0025_20_0037_0001
-4246.19	8.03	-48.674	3.583	0.429	q1_ao_14_e1_1_67_0001_20_0036_23_0035_0001
-4249.87	4.867	-51.718	3.884	0.429	q1_ao_14_e1_1_8_0002_20_0004_23_0016_0001
-4251.96	6.529	-51.67	4.111	0.429	q1_ao_14_e1_1_8_0002_20_0004_23_0019_0001
-4217.6	4.083	-58.067	3.548	0.429	q1_ao_16_e1_1_99_0001_32_0020_36_0037_0001
-4209.78	10.315	-48.741	3.56	0.429	q1_ao_16_e1_4_67_0002_33_0005_37_0003_0001
-4211.98	9.853	-48.774	3.474	0.429	q1_ao_16_e1_4_67_0002_33_0005_37_0011_0001
-4208.65	9.812	-50.387	3.527	0.429	q1_ao_16_e1_4_67_0002_33_0005_37_0014_0001
-4211.4	10.244	-49.125	3.513	0.429	q1_ao_16_e1_4_67_0002_33_0005_37_0024_0001
-4201.85	10.513	-49.587	3.501	0.429	q1_ao_16_e1_4_67_0002_33_0005_37_0028_0001
-4206.78	9.883	-49.153	3.566	0.429	q1_ao_16_e1_4_67_0002_33_0005_37_0029_0001
-4208.86	10.108	-49.47	3.508	0.429	q1_ao_16_e1_4_67_0002_33_0005_37_0030_0001
-4219	32.474	-57.305	3.99	0.429	q1_ao_17_e1_10_99_0002_36_0040_41_0034_0001
-4225.12	5.336	-46.319	3.872	0.429	q1_ao_19_e1_1_36_0002_44_0039_49_0031_0001
-4231.01	9.321	-39.457	3.553	0.429	q1_ao_19_e1_8_74_0001_47_0026_53_0036_0001
-4197.73	8.827	-55.382	3.754	0.429	q1_ao_1_e1_3_20_0001_49_0003_54_0001_0001
-4190.99	6.362	-40.859	3.605	0.429	q1_ao_1_e1_8_20_0001_51_0028_56_0010_0001
-4252.6	4.932	-54.392	3.377	0.429	q1_ao_20_e1_1_61_0001_53_0009_56_0038_0001
-4250.5	30.775	-39.897	3.919	0.429	q1_ao_20_e1_5_91_0001_54_0023_57_0012_0001
-4272.86	9.631	-48.882	3.661	0.429	q1_ao_3_e1_3_14_0001_66_0040_67_0005_0001
-4273.22	10.232	-48.855	3.695	0.429	q1_ao_3_e1_3_14_0001_66_0040_67_0032_0001
-4242.64	5.137	-61.183	3.93	0.429	q1_ao_4_e1_10_58_0001_71_0026_72_0034_0001
-4226.15	4.898	-61.826	3.705	0.429	q1_ao_4_e1_1_7_0001_72_0025_73_0027_0001
-4221.15	5.187	-54.817	3.634	0.429	q1_ao_4_e1_1_7_0001_72_0025_73_0031_0001
-4229.8	5.5	-62.594	3.723	0.429	q1_ao_4_e1_1_7_0001_72_0032_73_0027_0001
-4227.19	5.663	-61.288	3.705	0.429	q1_ao_4_e1_1_7_0001_72_0036_73_0002_0001
-4218.62	5.591	-60.94	3.695	0.429	q1_ao_4_e1_1_7_0001_72_0036_73_0016_0001
-4229.07	5.323	-62.197	3.719	0.429	q1_ao_4_e1_1_7_0001_72_0036_73_0029_0001
-4225.41	5.046	-63.208	3.707	0.429	q1_ao_4_e1_1_7_0001_72_0036_73_0032_0001
-4219.08	5.415	-59.4	3.708	0.429	q1_ao_4_e1_1_7_0001_72_0036_73_0034_0001
-4220.36	6.834	-48.774	3.857	0.429	q1_ao_4_e1_4_14_0002_73_0013_74_0012_0001
-4234.31	15.591	-60.682	4.086	0.429	q1_ao_4_e1_4_14_0002_73_0015_74_0037_0001
-4217.56	23.522	-46.163	3.685	0.429	q1_ao_4_e1_4_72_0002_73_0009_74_0039_0001
-4224.8	26.247	-51.095	3.809	0.429	q1_ao_4_e1_5_91_0002_74_0025_75_0028_0001
-4252.7	5.589	-64.355	3.814	0.429	q1_ao_5_e1_1_55_0001_77_0037_79_0010_0001
-4251.75	0.291	-56.152	3.638	0.429	q1_ao_6_e1_8_53_0001_83_0017_85_0009_0001
-4249.76	1.867	-57.384	3.65	0.429	q1_ao_6_e1_8_53_0001_83_0017_85_0028_0001
-4247.9	1.496	-60.13	3.732	0.429	q1_ao_6_e1_8_53_0001_83_0017_85_0029_0001
-4222.82	5.477	-53.979	3.597	0.429	q1_ao_8_e1_1_91_0001_88_0021_91_0037_0001
-4219.27	6.612	-53.496	3.799	0.429	q1_ao_8_e1_1_91_0001_88_0030_91_0001_0001
-4234.72	22.573	-52.971	3.661	0.429	q1_ao_8_e1_4_90_0001_90_0027_92_0002_0001
-4219.01	5.599	-52.621	3.569	0.429	q1_ao_8_e1_8_61_0001_92_0025_94_0003_0001
-4242.71	11.941	-46.463	3.657	0.429	q1_ao_9_e1_3_65_0001_94_0015_95_0010_0001
-4253.92	11.468	-44.975	3.691	0.429	q1_ao_9_e1_3_65_0001_94_0015_95_0034_0001
-4245.85	10.062	-45.657	3.647	0.429	q1_ao_9_e1_3_65_0001_94_0015_95_0036_0001
-4250.79	39.113	-35.078	4.116	0.429	q1_ao_9_e1_5_78_0002_96_0034_96_0018_0001
-4255.54	6.552	-45.858	3.829	0.429	q1_ao_9_e1_5_78_0002_96_0034_96_0022_0001
-4257.22	5.486	-59.134	3.626	0.429	q1_ao_9_e1_8_69_0002_99_0004_100_0022_100_0003
-4250.56	5.226	-56.718	3.655	0.429	q1_ao_9_e1_8_69_0002_99_0004_100_0022_100_0021
-4246.19	3.532	-50.375	3.689	0.429	q1_ao_14_e1_1_8_0002_20_0016_24_0015_12_0024
-4225.03	3.182	-36.781	3.667	0.429	q1_ao_14_e1_1_8_0002_20_0023_24_0016_13_0009
-4240.32	11.551	-39.84	3.971	0.429	q1_ao_14_e1_1_8_0002_20_0038_24_0018_14_0027
-4254.41	6.16	-57.086	3.958	0.429	q1_ao_14_e1_1_8_0002_20_0038_24_0022_14_0032
-4207.8	3.259	-47.416	3.689	0.429	q1_ao_10_e1_1_34_0001_1_0019_1_0032_1_0006
-4236.49	3.918	-35.433	3.361	0.429	q1_ao_14_e1_9_22_0002_27_0002_29_0029_29_0021
-4236.34	2.715	-31.189	3.365	0.429	q1_ao_14_e1_9_22_0002_27_0002_29_0039_29_0026
-4218.37	10.049	-44.15	3.583	0.429	q1_ao_10_e1_1_36_0002_1_0019_1_0003_2_0018
-4217.69	5.937	-54.207	3.74	0.429	q1_ao_10_e1_1_36_0002_1_0019_1_0032_2_0040
-4211.51	3.354	-60.935	3.598	0.429	q1_ao_10_e1_1_36_0002_1_0026_2_0020_2_0022
-4210.23	3.284	-60.152	3.761	0.429	q1_ao_10_e1_1_36_0002_1_0026_2_0027_2_0025
-4216.53	6.007	-58.213	3.589	0.429	q1_ao_16_e1_1_99_0001_32_0024_36_0035_32_0024
-4227.71	7.131	-53.341	3.69	0.429	q1_ao_16_e1_1_99_0001_32_0034_36_0022_32_0011
-4223.57	7.087	-51.512	3.71	0.429	q1_ao_16_e1_1_99_0001_32_0034_36_0022_32_0012
-4220.35	7.092	-53.494	3.71	0.429	q1_ao_16_e1_1_99_0001_32_0034_36_0022_32_0027
-4220.96	13.66	-54.324	4.099	0.429	q1_ao_16_e1_4_41_0002_33_0033_36_0022_33_0003
-4211.02	9.654	-50.809	3.536	0.429	q1_ao_16_e1_4_67_0002_33_0005_37_0003_33_0011
-4210.97	10.569	-47.921	3.479	0.429	q1_ao_16_e1_4_67_0002_33_0005_37_0011_33_0004
-4209.45	10.213	-48.528	3.51	0.429	q1_ao_16_e1_4_67_0002_33_0005_37_0011_33_0011
-4213.12	10.477	-51.107	3.468	0.429	q1_ao_16_e1_4_67_0002_33_0005_37_0014_33_0003
-4213.34	9.805	-49.949	3.482	0.429	q1_ao_16_e1_4_67_0002_33_0005_37_0014_33_0017
-4208.65	14.132	-46.772	3.521	0.429	q1_ao_16_e1_4_67_0002_33_0005_37_0014_33_0019
-4210.29	10.283	-49.925	3.513	0.429	q1_ao_16_e1_4_67_0002_33_0005_37_0014_33_0031
-4203.71	10.149	-49.654	3.493	0.429	q1_ao_16_e1_4_67_0002_33_0005_37_0019_33_0028
-4211.54	10.862	-48.749	3.502	0.429	q1_ao_16_e1_4_67_0002_33_0005_37_0024_33_0029
-4207.12	10.366	-47.287	3.486	0.429	q1_ao_16_e1_4_67_0002_33_0005_37_0026_34_0014
-4214.16	10.292	-51.01	3.488	0.429	q1_ao_16_e1_4_67_0002_33_0005_37_0026_34_0016
-4213.78	10.966	-48.662	3.486	0.429	q1_ao_16_e1_4_67_0002_33_0005_37_0026_34_0033
-4208.19	13.225	-47.858	3.497	0.429	q1_ao_16_e1_4_67_0002_33_0005_37_0027_34_0004
-4211.43	11.87	-48.803	3.491	0.429	q1_ao_16_e1_4_67_0002_33_0005_37_0027_34_0015
-4213.64	10.758	-49.971	3.517	0.429	q1_ao_16_e1_4_67_0002_33_0005_37_0027_34_0016
-4210.21	9.715	-49.722	3.538	0.429	q1_ao_16_e1_4_67_0002_33_0005_37_0027_34_0027
-4203.68	11.158	-48.541	3.479	0.429	q1_ao_16_e1_4_67_0002_33_0005_37_0028_34_0008
-4205.69	11.136	-47.609	3.499	0.429	q1_ao_16_e1_4_67_0002_33_0005_37_0028_34_0010
-4202.67	10.443	-50.115	3.513	0.429	q1_ao_16_e1_4_67_0002_33_0005_37_0028_34_0013
-4204.69	10.523	-51.564	3.493	0.429	q1_ao_16_e1_4_67_0002_33_0005_37_0028_34_0028
-4201.52	9.87	-51.06	3.506	0.429	q1_ao_16_e1_4_67_0002_33_0005_37_0028_34_0038
-4201.87	11.041	-49.001	3.499	0.429	q1_ao_16_e1_4_67_0002_33_0005_37_0028_34_0040
-4210.32	10.543	-46.401	3.525	0.429	q1_ao_16_e1_4_67_0002_33_0005_37_0029_34_0003
-4211.8	9.995	-49.186	3.497	0.429	q1_ao_16_e1_4_67_0002_33_0005_37_0029_34_0026
-4207.38	9.752	-47.167	3.499	0.429	q1_ao_16_e1_4_67_0002_33_0005_37_0029_34_0034
-4212.53	10.663	-47.544	3.518	0.429	q1_ao_16_e1_4_67_0002_33_0005_37_0030_34_0035
-4232.53	5.414	-49.381	3.78	0.429	q1_ao_19_e1_1_36_0002_44_0032_49_0005_37_0008
-4219.42	0.223	-31.63	3.443	0.429	q1_ao_19_e1_1_36_0002_44_0032_49_0015_37_0030
-4234.32	6.581	-44.227	4.02	0.429	q1_ao_19_e1_1_36_0002_44_0032_49_0019_37_0002
-4238.34	4.471	-49.895	3.605	0.429	q1_ao_19_e1_1_36_0002_44_0032_49_0019_37_0015
-4220.36	3.8	-39.205	3.662	0.429	q1_ao_19_e1_1_36_0002_44_0032_49_0019_37_0031
-4201.32	8.653	-57.91	3.759	0.429	q1_ao_1_e1_3_20_0001_49_0003_54_0001_39_0017
-4194.38	45.076	-39.096	3.759	0.429	q1_ao_1_e1_3_20_0001_49_0021_55_0029_40_0018
-4256.42	4.739	-51.806	3.381	0.429	q1_ao_20_e1_1_61_0001_53_0009_56_0038_41_0010
-4257.46	5.218	-50.757	3.457	0.429	q1_ao_20_e1_1_61_0001_53_0009_56_0038_41_0032
-4253.62	3.985	-47.421	3.859	0.429	q1_ao_20_e1_1_61_0001_53_0029_57_0040_41_0010
-4253.87	4.118	-48.494	3.875	0.429	q1_ao_20_e1_1_61_0001_53_0029_57_0040_41_0034
-4250.03	25.107	-47.028	3.958	0.429	q1_ao_20_e1_5_91_0001_54_0013_57_0039_41_0019
-4267.88	3.724	-52.793	4.014	0.429	q1_ao_2_e1_1_50_0002_59_0020_63_0019_51_0005
-4252.72	17.122	-44.458	3.84	0.429	q1_ao_2_e1_3_14_0001_59_0001_63_0008_51_0009
-4272.07	9.48	-48.478	3.66	0.429	q1_ao_3_e1_3_14_0001_66_0040_67_0004_54_0024
-4263.38	8.824	-54.379	3.659	0.429	q1_ao_3_e1_3_14_0001_66_0040_67_0004_54_0026
-4273.11	9.793	-49.975	3.691	0.429	q1_ao_3_e1_3_14_0001_66_0040_67_0004_54_0040
-4261.57	7.005	-52.891	3.728	0.429	q1_ao_3_e1_3_14_0001_66_0040_67_0005_54_0017
-4272.68	8.9	-57.127	3.749	0.429	q1_ao_3_e1_3_14_0001_66_0040_67_0032_54_0017
-4267.97	9.653	-47.355	3.713	0.429	q1_ao_3_e1_3_14_0001_66_0040_67_0032_54_0037
-4265.21	6.986	-49.14	3.835	0.429	q1_ao_3_e1_3_77_0001_67_0004_68_0004_55_0003
-4269.35	7.223	-50.674	3.817	0.429	q1_ao_3_e1_3_77_0001_67_0004_68_0004_55_0037
-4267.87	6.816	-51.909	3.843	0.429	q1_ao_3_e1_3_77_0001_67_0004_68_0004_55_0040
-4210.66	12.387	-48.487	3.518	0.429	q1_ao_13_e1_4_60_0002_16_0018_20_0014_6_0011
-4216.15	12.128	-54.901	3.522	0.429	q1_ao_13_e1_4_60_0002_16_0018_20_0023_6_0023
-4229.07	19.826	-53.252	3.755	0.429	q1_ao_4_e1_10_58_0001_71_0040_73_0001_72_0019
-4221.54	5.534	-62.104	3.706	0.429	q1_ao_4_e1_1_7_0001_72_0010_73_0005_73_0011
-4214.65	5.399	-59.42	3.712	0.429	q1_ao_4_e1_1_7_0001_72_0010_73_0005_73_0015
-4218.66	5.281	-62.16	3.692	0.429	q1_ao_4_e1_1_7_0001_72_0010_73_0005_73_0018
-4219.46	5.444	-61.879	3.707	0.429	q1_ao_4_e1_1_7_0001_72_0010_73_0005_73_0019
-4196.77	6.178	-48.064	3.776	0.429	q1_ao_4_e1_1_7_0001_72_0010_73_0005_73_0034
-4222.92	5.522	-61.286	3.982	0.429	q1_ao_4_e1_1_7_0001_72_0010_73_0017_73_0034
-4216.79	6.725	-61.433	3.742	0.429	q1_ao_4_e1_1_7_0001_72_0024_73_0015_73_0031
-4216.39	12.569	-47.518	3.857	0.429	q1_ao_4_e1_1_7_0001_72_0024_73_0021_73_0004
-4206.66	12.167	-48.017	3.883	0.429	q1_ao_4_e1_1_7_0001_72_0024_73_0021_73_0026
-4218.23	5.018	-58.137	3.723	0.429	q1_ao_4_e1_1_7_0001_72_0025_73_0027_74_0005
-4227.36	4.673	-63.283	3.738	0.429	q1_ao_4_e1_1_7_0001_72_0025_73_0027_74_0016
-4223.4	4.8	-60.448	3.738	0.429	q1_ao_4_e1_1_7_0001_72_0025_73_0027_74_0020
-4225.34	4.925	-62.056	3.723	0.429	q1_ao_4_e1_1_7_0001_72_0025_73_0027_74_0024
-4226.97	4.832	-62.427	3.721	0.429	q1_ao_4_e1_1_7_0001_72_0025_73_0027_74_0036
-4224.03	5.203	-58.422	3.658	0.429	q1_ao_4_e1_1_7_0001_72_0025_73_0031_74_0003
-4228.96	5.541	-61.626	3.715	0.429	q1_ao_4_e1_1_7_0001_72_0032_73_0027_74_0008
-4229.41	5.231	-61.963	3.722	0.429	q1_ao_4_e1_1_7_0001_72_0036_73_0002_74_0008
-4229.3	5.153	-62.663	3.71	0.429	q1_ao_4_e1_1_7_0001_72_0036_73_0002_74_0018
-4228.14	5.263	-62.681	3.709	0.429	q1_ao_4_e1_1_7_0001_72_0036_73_0002_74_0029
-4221.53	5.414	-63.363	3.679	0.429	q1_ao_4_e1_1_7_0001_72_0036_73_0016_74_0001
-4217.69	5.416	-61.259	3.676	0.429	q1_ao_4_e1_1_7_0001_72_0036_73_0016_74_0020
-4219.45	5.513	-62.067	3.709	0.429	q1_ao_4_e1_1_7_0001_72_0036_73_0016_74_0024
-4227.05	5.648	-61.64	3.718	0.429	q1_ao_4_e1_1_7_0001_72_0036_73_0029_74_0024
-4227.88	5.353	-62.137	3.703	0.429	q1_ao_4_e1_1_7_0001_72_0036_73_0029_74_0036
-4215.96	10.436	-45.374	3.777	0.429	q1_ao_4_e1_1_7_0001_72_0036_73_0032_75_0008
-4224.52	5.375	-62.487	3.721	0.429	q1_ao_4_e1_1_7_0001_72_0036_73_0032_75_0015
-4228.42	5.001	-63.533	3.724	0.429	q1_ao_4_e1_1_7_0001_72_0036_73_0032_75_0027
-4234.41	4.326	-70.262	3.765	0.429	q1_ao_4_e1_1_7_0001_72_0036_73_0032_75_0038
-4228.3	5.071	-61.926	3.732	0.429	q1_ao_4_e1_1_7_0001_72_0036_73_0034_75_0004
-4229.75	5.083	-62.378	3.714	0.429	q1_ao_4_e1_1_7_0001_72_0036_73_0034_75_0013
-4226.84	5.108	-61.271	3.703	0.429	q1_ao_4_e1_1_7_0001_72_0036_73_0034_75_0016
-4210.85	5.627	-57.878	3.712	0.429	q1_ao_4_e1_1_7_0001_72_0036_73_0034_75_0030
-4227.23	5.605	-62.581	3.71	0.429	q1_ao_4_e1_1_7_0001_72_0036_73_0034_75_0034
-4225.53	5.85	-62.256	3.719	0.429	q1_ao_4_e1_1_7_0001_72_0036_73_0034_75_0037
-4225.69	6.946	-54.393	3.861	0.429	q1_ao_4_e1_4_14_0002_73_0013_74_0012_75_0011
-4241.88	13.413	-69.829	4.113	0.429	q1_ao_4_e1_4_14_0002_73_0015_74_0025_76_0039
-4231.79	16.688	-59.511	4.069	0.429	q1_ao_4_e1_4_14_0002_73_0015_74_0037_76_0005
-4233.46	17.283	-60.666	4.066	0.429	q1_ao_4_e1_4_14_0002_73_0015_74_0037_76_0010
-4229.29	16.783	-58.688	4.062	0.429	q1_ao_4_e1_4_14_0002_73_0015_74_0037_76_0036
-4231.7	16.798	-60.897	4.059	0.429	q1_ao_4_e1_4_14_0002_73_0015_74_0037_76_0038
-4227.59	13.624	-54.745	3.792	0.429	q1_ao_4_e1_4_14_0002_73_0018_74_0002_77_0037
-4212.77	27.64	-44.681	3.806	0.429	q1_ao_4_e1_4_14_0002_73_0018_74_0022_77_0038
-4217.99	16.839	-54.258	3.983	0.429	q1_ao_4_e1_5_91_0002_74_0001_75_0027_79_0037
-4211.9	12.925	-51.332	3.604	0.429	q1_ao_13_e1_4_60_0002_16_0018_20_0040_7_0030
-4215.29	13.021	-52.198	3.593	0.429	q1_ao_13_e1_4_60_0002_16_0018_20_0040_7_0039
-4244.33	8.317	-47.511	3.617	0.429	q1_ao_14_e1_1_67_0001_20_0036_23_0014_7_0016
-4234.75	20.485	-56.757	4.062	0.429	q1_ao_4_e1_5_91_0002_74_0023_75_0017_80_0016
-4221.37	18.812	-57.198	4.041	0.429	q1_ao_4_e1_5_91_0002_74_0023_75_0027_80_0005
-4224.83	19.675	-53.446	4.047	0.429	q1_ao_4_e1_5_91_0002_74_0023_75_0039_81_0010
-4234.68	9.019	-51.3	3.895	0.429	q1_ao_5_e1_1_10_0001_77_0032_79_0036_84_0006
-4241.39	8.779	-51.453	3.921	0.429	q1_ao_5_e1_1_10_0001_77_0032_79_0036_84_0016
-4233.83	8.862	-50.419	3.895	0.429	q1_ao_5_e1_1_10_0001_77_0032_79_0036_84_0017
-4243.73	5.761	-61.568	3.805	0.429	q1_ao_5_e1_1_55_0001_77_0037_79_0010_85_0005
-4250.37	5.75	-63.401	3.804	0.429	q1_ao_5_e1_1_55_0001_77_0037_79_0010_85_0036
-4238.15	6.221	-48.089	3.499	0.429	q1_ao_6_e1_8_53_0001_83_0001_85_0034_87_0006
-4237.22	5.812	-48.142	3.584	0.429	q1_ao_6_e1_8_53_0001_83_0001_85_0034_87_0023
-4241.01	6.661	-48.789	3.502	0.429	q1_ao_6_e1_8_53_0001_83_0001_85_0034_87_0030
-4248.25	0.478	-60.771	3.701	0.429	q1_ao_6_e1_8_53_0001_83_0017_85_0009_87_0021
-4255.83	1.295	-65.379	3.687	0.429	q1_ao_6_e1_8_53_0001_83_0017_85_0028_88_0039
-4250.64	9.843	-60.134	3.9	0.429	q1_ao_6_e1_8_53_0001_83_0022_85_0031_88_0030
-4223.21	10.83	-52.269	3.744	0.429	q1_ao_8_e1_1_23_0001_88_0004_91_0012_88_0031
-4227.38	5.171	-59.037	3.587	0.429	q1_ao_8_e1_1_91_0001_88_0021_91_0037_89_0020
-4226.37	6.267	-54.632	3.666	0.429	q1_ao_8_e1_1_91_0001_88_0022_91_0019_89_0040
-4220.65	6.936	-53.435	3.828	0.429	q1_ao_8_e1_1_91_0001_88_0030_91_0001_89_0014
-4220.22	6.689	-54.082	3.816	0.429	q1_ao_8_e1_1_91_0001_88_0030_91_0001_89_0028
-4222.73	6.598	-55.626	3.809	0.429	q1_ao_8_e1_1_91_0001_88_0030_91_0001_89_0037
-4249.16	8.395	-48.87	3.588	0.429	q1_ao_14_e1_1_67_0001_20_0036_23_0035_8_0003
-4247.82	8.193	-49.367	3.594	0.429	q1_ao_14_e1_1_67_0001_20_0036_23_0035_8_0031
-4254.47	5.237	-59.906	3.798	0.429	q1_ao_14_e1_1_67_0001_20_0038_23_0024_8_0003
-4234.57	24.177	-50.935	3.722	0.429	q1_ao_8_e1_4_90_0001_90_0027_92_0002_91_0006
-4229.57	22.723	-51.503	3.648	0.429	q1_ao_8_e1_4_90_0001_90_0027_92_0002_91_0040
-4212.45	5.948	-45.517	3.436	0.429	q1_ao_8_e1_8_33_0002_92_0018_94_0004_93_0006
-4218.67	5.806	-52.989	3.491	0.429	q1_ao_8_e1_8_33_0002_92_0018_94_0004_93_0022
-4227.88	5.008	-58.977	3.626	0.429	q1_ao_8_e1_8_33_0002_92_0018_94_0005_93_0008
-4223.53	5.64	-53.898	3.51	0.429	q1_ao_8_e1_8_61_0001_92_0025_94_0003_93_0018
-4219.55	5.49	-54.294	3.594	0.429	q1_ao_8_e1_8_61_0001_92_0025_94_0003_93_0028
-4218.23	5.539	-52.47	3.566	0.429	q1_ao_8_e1_8_61_0001_92_0025_94_0003_93_0036
-4223.66	5.353	-53.266	3.536	0.429	q1_ao_8_e1_8_61_0001_92_0025_94_0026_94_0001
-4224.11	5.526	-53.611	3.537	0.429	q1_ao_8_e1_8_61_0001_92_0025_94_0026_94_0011
-4224.03	5.578	-55.49	3.55	0.429	q1_ao_8_e1_8_61_0001_92_0025_94_0026_94_0012
-4223.77	5.344	-54.43	3.533	0.429	q1_ao_8_e1_8_61_0001_92_0025_94_0026_94_0013
-4224.93	5.56	-55.666	3.524	0.429	q1_ao_8_e1_8_61_0001_92_0025_94_0026_94_0015
-4262.19	7.267	-60.768	3.704	0.429	q1_ao_9_e1_3_65_0001_94_0040_95_0004_94_0034
-4248.12	8.531	-47.224	3.644	0.429	q1_ao_9_e1_3_65_0001_94_0040_95_0038_94_0021
-4248.55	8.775	-46.852	3.623	0.429	q1_ao_9_e1_3_65_0001_94_0040_95_0038_94_0023
-4247.62	8.195	-48.617	3.645	0.429	q1_ao_9_e1_3_65_0001_94_0040_95_0038_94_0040
-4230.6	41.064	-26.445	3.486	0.429	q1_ao_9_e1_5_78_0002_96_0015_96_0020_95_0021
-4246.56	5.62	-55.543	3.616	0.429	q1_ao_14_e1_1_67_0001_20_0038_23_0036_9_0023
-4249.68	4.334	-53.162	3.915	0.429	q1_ao_14_e1_1_8_0002_20_0004_23_0016_9_0013
-4255.96	6.781	-53.13	4.104	0.429	q1_ao_14_e1_1_8_0002_20_0004_23_0017_9_0002
-4256.47	6.757	-53.612	4.108	0.429	q1_ao_14_e1_1_8_0002_20_0004_23_0017_9_0021
-4196.61	64.312	-36.549	4.157	0.417	q1_ao_10_e1_5_1_0002
-4200.73	17.822	-32.21	3.703	0.417	q1_ao_8_e1_2_30_0001
-4220.84	13.877	-19.926	3.387	0.417	q1_ao_14_e1_4_36_0001
-4246.34	21.449	-22.23	3.418	0.417	q1_ao_3_e1_9_42_0002
-4236.11	5.776	-53.94	3.733	0.417	q1_ao_5_e1_1_55_0001
-4226.48	4.996	-50.245	3.593	0.417	q1_ao_15_e1_1_9_0002
-4209.45	12.401	-37.232	3.462	0.417	q1_ao_13_e1_4_60_0002_16_0014
[truncated: 155,530 more rows]
