# Supplementary material for: Allosteric mechanism for KCNE1 modulation of KCNQ1 potassium channel activation
Source: eLife. 2020 Oct 23;9:e57680. doi: 10.7554/eLife.57680 (PMC7584456; doi:10.7554/eLife.57680)
Supplement: Figure 3—figure supplement 4—source data 2. [file elife-57680-fig3-figsupp4-data2.xlsx]

## Sheet: Sheet1
Rosetta fullatom score	Atom pair restraint score	Rosetta ddg binding score	Interface RMSD vs Q1E3 cryoEM model	Fraction same contacts as Q1E3 cryoEM model	Model description
-4301.78	1.199	-69.245	2.315	0.848	q1_ao_3_e3_9_98_0002_70_0003_67_0004
-4297.47	0.897	-74.651	2.322	0.848	q1_ao_3_e3_9_98_0002_70_0006_67_0030
-4290.96	1.179	-71.74	2.344	0.848	q1_ao_3_e3_9_98_0002_70_0018_68_0001
-4261.65	0.869	-73.91	2.505	0.848	q1_ao_12_e3_2_70_0002_16_0022_21_0010_17_0018
-4262.39	0.875	-75.245	2.436	0.848	q1_ao_12_e3_2_70_0002_16_0022_21_0040_18_0029
-4249.57	1.961	-75.473	2.377	0.848	q1_ao_13_e3_8_37_0002_20_0036_24_0028_21_0036
-4293.39	0.707	-71.064	2.4	0.848	q1_ao_3_e3_1_21_0001_64_0020_59_0038_60_0022
-4287.43	0.833	-69.129	2.332	0.848	q1_ao_3_e3_8_21_0001_69_0003_62_0037_70_0031
-4289.69	1.167	-70.635	2.332	0.848	q1_ao_3_e3_9_98_0002_70_0018_68_0001_79_0005
-4290	1.206	-69.789	2.342	0.848	q1_ao_3_e3_9_98_0002_70_0018_68_0001_79_0013
-4292.34	1.309	-72.362	2.318	0.848	q1_ao_3_e3_9_98_0002_70_0018_68_0001_79_0021
-4289.97	1.286	-71.46	2.311	0.848	q1_ao_3_e3_9_98_0002_70_0018_68_0001_79_0023
-4291.49	1.241	-72.538	2.299	0.848	q1_ao_3_e3_9_98_0002_70_0018_68_0001_79_0028
-4289.69	1.241	-70.78	2.367	0.848	q1_ao_3_e3_9_98_0002_70_0018_68_0001_79_0032
-4290.37	1.274	-71.539	2.323	0.848	q1_ao_3_e3_9_98_0002_70_0018_68_0001_79_0034
-4291.72	1.28	-71.197	2.317	0.848	q1_ao_3_e3_9_98_0002_70_0018_68_0001_79_0036
-4295.02	1.135	-72.568	2.33	0.848	q1_ao_3_e3_9_98_0002_70_0035_68_0029_79_0009
-4295.91	1.106	-73.872	2.37	0.848	q1_ao_3_e3_9_98_0002_70_0035_68_0029_79_0021
-4296.04	1.182	-73.755	2.37	0.848	q1_ao_3_e3_9_98_0002_70_0035_68_0029_79_0038
-4298.5	0.767	-68.042	2.392	0.835	q1_ao_3_e3_8_21_0001_69_0021
-4250.21	2.028	-73.306	2.388	0.835	q1_ao_13_e3_8_37_0002_20_0025_24_0032
-4246.57	1.991	-73.77	2.383	0.835	q1_ao_13_e3_8_37_0002_20_0036_24_0028
-4261.71	0.85	-72.173	2.47	0.835	q1_ao_19_e3_1_9_0001_43_0001_42_0037
-4282.73	0.858	-67.524	2.342	0.835	q1_ao_2_e3_6_59_0001_62_0012_57_0035
-4300.91	0.764	-69.625	2.32	0.835	q1_ao_3_e3_8_21_0001_69_0021_63_0007
-4302.15	0.836	-70.325	2.329	0.835	q1_ao_3_e3_8_21_0001_69_0021_63_0020
-4302.99	0.792	-70.886	2.331	0.835	q1_ao_3_e3_8_21_0001_69_0021_63_0040
-4299.5	0.784	-69.427	2.348	0.835	q1_ao_3_e3_8_21_0001_69_0023_63_0030
-4297.53	0.801	-68.448	2.322	0.835	q1_ao_3_e3_8_21_0001_69_0034_63_0003
-4299.86	0.862	-66.849	2.304	0.835	q1_ao_3_e3_8_21_0001_69_0039_63_0015
-4296.11	0.914	-70.289	2.357	0.835	q1_ao_3_e3_8_21_0001_69_0039_63_0016
-4301.44	0.898	-68.799	2.33	0.835	q1_ao_3_e3_8_21_0001_69_0039_63_0020
-4297.15	0.994	-72.991	2.321	0.835	q1_ao_3_e3_9_98_0002_70_0003_67_0003
-4292.87	1.03	-71.405	2.403	0.835	q1_ao_3_e3_9_98_0002_70_0017_67_0022
-4292.28	1.066	-68.9	2.362	0.835	q1_ao_3_e3_9_98_0002_70_0017_67_0032
-4293.36	1.09	-71.983	2.424	0.835	q1_ao_3_e3_9_98_0002_70_0025_68_0009
-4293.82	1.152	-73.103	2.348	0.835	q1_ao_3_e3_9_98_0002_70_0025_68_0020
-4296.6	1.445	-72.783	2.336	0.835	q1_ao_3_e3_9_98_0002_70_0035_68_0024
-4296.64	1.098	-73.438	2.335	0.835	q1_ao_3_e3_9_98_0002_70_0035_68_0029
-4291.71	1.244	-72.708	2.411	0.835	q1_ao_3_e3_9_98_0002_70_0040_68_0001
-4282.59	1.247	-66.812	2.392	0.835	q1_ao_3_e3_9_98_0002_70_0040_68_0009
-4283.56	0.711	-79.943	2.403	0.835	q1_ao_9_e3_5_38_0002_98_0011_95_0016
-4263.29	0.762	-74.245	2.507	0.835	q1_ao_12_e3_2_70_0002_16_0022_21_0010_17_0008
-4264.74	0.76	-73.974	2.498	0.835	q1_ao_12_e3_2_70_0002_16_0022_21_0039_17_0011
-4264.72	0.585	-74.827	2.5	0.835	q1_ao_12_e3_2_70_0002_16_0022_21_0039_17_0015
-4264.37	0.564	-75.338	2.499	0.835	q1_ao_12_e3_2_70_0002_16_0022_21_0039_17_0025
-4258.58	0.685	-74.066	2.548	0.835	q1_ao_12_e3_8_28_0002_17_0019_22_0004_18_0006
-4259.24	0.594	-72.024	2.481	0.835	q1_ao_12_e3_8_28_0002_17_0019_22_0036_19_0003
-4251.59	2.101	-74.515	2.364	0.835	q1_ao_13_e3_8_37_0002_20_0025_24_0032_20_0002
-4252.91	1.798	-75.98	2.343	0.835	q1_ao_13_e3_8_37_0002_20_0025_24_0032_20_0016
-4249.76	1.949	-74.55	2.39	0.835	q1_ao_13_e3_8_37_0002_20_0025_24_0032_20_0018
-4252.43	1.778	-73.973	2.382	0.835	q1_ao_13_e3_8_37_0002_20_0025_24_0032_20_0022
-4251.57	1.958	-74.977	2.382	0.835	q1_ao_13_e3_8_37_0002_20_0025_24_0032_20_0026
-4251.47	1.902	-74.6	2.382	0.835	q1_ao_13_e3_8_37_0002_20_0025_24_0032_20_0033
-4251.87	1.835	-74.2	2.379	0.835	q1_ao_13_e3_8_37_0002_20_0025_24_0032_20_0037
-4249.44	2.169	-73.868	2.379	0.835	q1_ao_13_e3_8_37_0002_20_0036_24_0010_20_0011
-4246.22	2.199	-71.782	2.37	0.835	q1_ao_13_e3_8_37_0002_20_0036_24_0010_20_0039
-4247.44	1.098	-70.874	2.418	0.835	q1_ao_13_e3_8_37_0002_20_0036_24_0012_20_0017
-4245.63	1.077	-70.136	2.419	0.835	q1_ao_13_e3_8_37_0002_20_0036_24_0012_20_0023
-4248.29	0.985	-71.27	2.416	0.835	q1_ao_13_e3_8_37_0002_20_0036_24_0012_20_0027
-4248.93	1.089	-71.018	2.42	0.835	q1_ao_13_e3_8_37_0002_20_0036_24_0012_20_0028
-4246.2	1.102	-72.291	2.413	0.835	q1_ao_13_e3_8_37_0002_20_0036_24_0012_20_0029
-4249.11	2.147	-74.538	2.377	0.835	q1_ao_13_e3_8_37_0002_20_0036_24_0028_21_0002
-4245.63	1.949	-74.965	2.355	0.835	q1_ao_13_e3_8_37_0002_20_0036_24_0028_21_0006
-4249.92	2.099	-74.728	2.355	0.835	q1_ao_13_e3_8_37_0002_20_0036_24_0028_21_0015
-4249.84	1.962	-76.175	2.382	0.835	q1_ao_13_e3_8_37_0002_20_0036_24_0028_21_0029
-4250.4	2.181	-74.367	2.377	0.835	q1_ao_13_e3_8_37_0002_20_0036_24_0037_21_0020
-4278.83	0.687	-73.846	2.295	0.835	q1_ao_14_e3_4_83_0002_25_0003_26_0035_24_0021
-4281.67	0.685	-75.545	2.322	0.835	q1_ao_14_e3_4_83_0002_25_0003_26_0035_24_0040
-4256.21	0.967	-73.591	2.427	0.835	q1_ao_19_e3_1_9_0001_43_0001_42_0036_41_0025
-4253.82	0.824	-72.28	2.462	0.835	q1_ao_19_e3_1_9_0001_43_0001_42_0036_41_0028
-4267.1	0.745	-75.751	2.413	0.835	q1_ao_19_e3_1_9_0001_43_0001_42_0037_41_0023
-4309.2	0.981	-76.36	2.221	0.835	q1_ao_3_e3_2_15_0001_64_0001_59_0029_61_0030
-4293.65	0.592	-73.065	2.302	0.835	q1_ao_3_e3_2_15_0001_64_0006_59_0011_61_0016
-4300.95	0.567	-76.402	2.327	0.835	q1_ao_3_e3_2_15_0001_64_0013_60_0001_61_0023
-4297.93	0.566	-75.129	2.378	0.835	q1_ao_3_e3_2_15_0001_64_0013_60_0001_61_0036
-4298.26	0.638	-70.712	2.369	0.835	q1_ao_3_e3_2_15_0001_64_0013_60_0030_62_0005
-4308.96	0.581	-71.662	2.289	0.835	q1_ao_3_e3_2_15_0001_64_0035_60_0016_63_0021
-4300.54	0.433	-73.648	2.263	0.835	q1_ao_3_e3_2_15_0001_64_0037_60_0039_64_0006
-4297.28	0.717	-72.576	2.283	0.835	q1_ao_3_e3_2_15_0001_64_0038_60_0027_64_0013
-4297.57	0.707	-73.64	2.338	0.835	q1_ao_3_e3_2_15_0001_64_0038_60_0027_64_0036
-4296.06	0.842	-70.955	2.293	0.835	q1_ao_3_e3_4_92_0001_66_0030_61_0032_65_0027
-4300.81	1.126	-73.686	2.208	0.835	q1_ao_3_e3_6_5_0001_67_0001_61_0012_66_0017
-4292.43	1.017	-73.814	2.292	0.835	q1_ao_3_e3_6_5_0001_67_0001_61_0012_66_0038
-4292.56	0.764	-74.497	2.295	0.835	q1_ao_3_e3_6_5_0001_67_0022_62_0003_68_0024
-4290.2	0.892	-70.855	2.252	0.835	q1_ao_3_e3_8_21_0001_69_0003_62_0009_70_0030
-4290.66	0.944	-72.563	2.369	0.835	q1_ao_3_e3_8_21_0001_69_0003_62_0024_70_0019
-4294.23	0.89	-71.7	2.376	0.835	q1_ao_3_e3_8_21_0001_69_0003_62_0037_70_0006
-4292.94	0.998	-70.97	2.368	0.835	q1_ao_3_e3_8_21_0001_69_0003_62_0037_70_0014
-4300.02	0.873	-69.197	2.342	0.835	q1_ao_3_e3_8_21_0001_69_0003_62_0037_70_0017
-4295.18	0.934	-71.495	2.346	0.835	q1_ao_3_e3_8_21_0001_69_0003_62_0037_70_0021
-4296.41	0.9	-72.742	2.346	0.835	q1_ao_3_e3_8_21_0001_69_0003_62_0037_70_0027
-4292.95	0.966	-68.826	2.36	0.835	q1_ao_3_e3_8_21_0001_69_0003_62_0037_70_0040
-4300.98	0.87	-69.21	2.343	0.835	q1_ao_3_e3_8_21_0001_69_0021_63_0040_71_0002
-4301.82	0.764	-71.924	2.339	0.835	q1_ao_3_e3_8_21_0001_69_0021_63_0040_71_0005
-4300.1	0.823	-73.059	2.323	0.835	q1_ao_3_e3_8_21_0001_69_0021_63_0040_71_0018
-4301.04	0.865	-71.116	2.337	0.835	q1_ao_3_e3_8_21_0001_69_0021_63_0040_71_0020
-4295.98	0.715	-69.317	2.374	0.835	q1_ao_3_e3_8_21_0001_69_0021_63_0040_71_0023
-4292.6	0.863	-71.606	2.375	0.835	q1_ao_3_e3_8_21_0001_69_0021_63_0040_71_0028
-4300.61	0.828	-69.668	2.316	0.835	q1_ao_3_e3_8_21_0001_69_0023_63_0036_71_0009
-4288.71	0.888	-70.402	2.454	0.835	q1_ao_3_e3_8_21_0001_69_0040_63_0008_72_0001
-4290.74	0.787	-70.986	2.439	0.835	q1_ao_3_e3_8_21_0001_69_0040_63_0008_72_0010
-4292.26	1.059	-70.749	2.357	0.835	q1_ao_3_e3_8_21_0001_69_0040_63_0008_72_0013
-4294.1	0.658	-71.894	2.467	0.835	q1_ao_3_e3_8_21_0001_69_0040_63_0008_72_0020
-4295.76	1.11	-74.503	2.374	0.835	q1_ao_3_e3_8_61_0002_69_0018_64_0032_73_0025
-4298.22	0.504	-76.213	2.453	0.835	q1_ao_3_e3_8_65_0001_69_0002_64_0013_75_0002
-4292.85	1.092	-72.241	2.381	0.835	q1_ao_3_e3_9_98_0002_70_0003_67_0003_78_0003
-4292.95	1.279	-71.306	2.404	0.835	q1_ao_3_e3_9_98_0002_70_0003_67_0003_78_0007
-4293.73	1.175	-71.396	2.408	0.835	q1_ao_3_e3_9_98_0002_70_0003_67_0003_78_0009
-4290.58	1.21	-69.52	2.412	0.835	q1_ao_3_e3_9_98_0002_70_0003_67_0003_78_0017
-4290.76	1.116	-70.708	2.406	0.835	q1_ao_3_e3_9_98_0002_70_0003_67_0003_78_0030
-4292.84	1.137	-73.047	2.341	0.835	q1_ao_3_e3_9_98_0002_70_0003_67_0003_78_0033
-4295.65	1.027	-72.589	2.317	0.835	q1_ao_3_e3_9_98_0002_70_0006_67_0030_79_0013
-4296.85	1.01	-71.593	2.32	0.835	q1_ao_3_e3_9_98_0002_70_0006_67_0030_79_0025
-4297.78	0.862	-73.45	2.296	0.835	q1_ao_3_e3_9_98_0002_70_0006_67_0030_79_0027
-4295.5	0.973	-72.696	2.276	0.835	q1_ao_3_e3_9_98_0002_70_0006_67_0030_79_0028
-4295.27	1.009	-71.527	2.354	0.835	q1_ao_3_e3_9_98_0002_70_0006_67_0030_79_0033
-4296.25	1.038	-74.289	2.297	0.835	q1_ao_3_e3_9_98_0002_70_0006_67_0030_79_0034
-4291.88	1.21	-72.625	2.383	0.835	q1_ao_3_e3_9_98_0002_70_0017_67_0022_79_0001
-4288.99	1.182	-71.635	2.384	0.835	q1_ao_3_e3_9_98_0002_70_0017_67_0022_79_0003
-4294.64	1.231	-73.084	2.412	0.835	q1_ao_3_e3_9_98_0002_70_0017_67_0022_79_0014
-4295.42	1.149	-73.006	2.335	0.835	q1_ao_3_e3_9_98_0002_70_0017_67_0022_79_0027
-4293.34	1.253	-71.874	2.414	0.835	q1_ao_3_e3_9_98_0002_70_0017_67_0022_79_0029
-4290.75	1.213	-71.102	2.408	0.835	q1_ao_3_e3_9_98_0002_70_0017_67_0022_79_0034
-4288.52	1.144	-70.468	2.296	0.835	q1_ao_3_e3_9_98_0002_70_0018_68_0001_79_0004
-4291.86	1.259	-72.234	2.318	0.835	q1_ao_3_e3_9_98_0002_70_0018_68_0001_79_0025
-4291.86	1.063	-71.41	2.338	0.835	q1_ao_3_e3_9_98_0002_70_0018_68_0001_79_0033
-4289.96	1.051	-68.171	2.336	0.835	q1_ao_3_e3_9_98_0002_70_0018_68_0001_79_0035
-4294.39	1.23	-71.669	2.414	0.835	q1_ao_3_e3_9_98_0002_70_0025_68_0009_79_0001
-4290.35	1.22	-70.989	2.347	0.835	q1_ao_3_e3_9_98_0002_70_0025_68_0009_79_0004
-4292.22	1.109	-71.172	2.408	0.835	q1_ao_3_e3_9_98_0002_70_0025_68_0009_79_0007
-4294.82	1.16	-72.892	2.344	0.835	q1_ao_3_e3_9_98_0002_70_0025_68_0009_79_0008
-4290.56	1.017	-70.776	2.439	0.835	q1_ao_3_e3_9_98_0002_70_0025_68_0009_79_0010
-4293.83	1.223	-71.895	2.343	0.835	q1_ao_3_e3_9_98_0002_70_0025_68_0009_79_0014
-4290.55	1.24	-71.997	2.311	0.835	q1_ao_3_e3_9_98_0002_70_0025_68_0009_79_0026
-4290.61	1.282	-71.141	2.315	0.835	q1_ao_3_e3_9_98_0002_70_0025_68_0009_79_0027
-4293.91	1.078	-71.417	2.416	0.835	q1_ao_3_e3_9_98_0002_70_0025_68_0009_79_0029
-4294.74	1.163	-71.964	2.413	0.835	q1_ao_3_e3_9_98_0002_70_0025_68_0020_79_0011
-4291.95	1.286	-72.291	2.309	0.835	q1_ao_3_e3_9_98_0002_70_0025_68_0020_79_0012
-4290.86	1.166	-71.343	2.387	0.835	q1_ao_3_e3_9_98_0002_70_0025_68_0020_79_0013
-4295.16	1.13	-72.591	2.341	0.835	q1_ao_3_e3_9_98_0002_70_0025_68_0020_79_0017
-4294.88	1.26	-72.5	2.308	0.835	q1_ao_3_e3_9_98_0002_70_0025_68_0020_79_0020
-4295.02	1.131	-72.58	2.339	0.835	q1_ao_3_e3_9_98_0002_70_0025_68_0020_79_0039
-4295.82	1.298	-73.063	2.382	0.835	q1_ao_3_e3_9_98_0002_70_0035_68_0029_79_0020
-4295.28	1.227	-72.548	2.355	0.835	q1_ao_3_e3_9_98_0002_70_0035_68_0029_79_0022
-4291.69	1.143	-70.201	2.33	0.835	q1_ao_3_e3_9_98_0002_70_0035_68_0029_79_0028
-4299.95	0.686	-69.855	2.268	0.835	q1_ao_3_e3_9_98_0002_70_0035_68_0029_79_0033
-4294.51	1.351	-71.174	2.377	0.835	q1_ao_3_e3_9_98_0002_70_0035_68_0029_79_0037
-4294.24	1.307	-73.437	2.456	0.835	q1_ao_3_e3_9_98_0002_70_0040_68_0004_79_0007
-4294.74	1.277	-74.263	2.426	0.835	q1_ao_3_e3_9_98_0002_70_0040_68_0004_79_0026
-4293.01	1.205	-74.002	2.425	0.835	q1_ao_3_e3_9_98_0002_70_0040_68_0006_79_0029
-4291.9	1.28	-72.99	2.399	0.835	q1_ao_3_e3_9_98_0002_70_0040_68_0006_79_0030
-4301.54	0.703	-79.089	2.204	0.835	q1_ao_11_e3_2_41_0002_7_0017_8_0011_7_0009
-4292.4	1.306	-72.729	2.43	0.835	q1_ao_3_e3_9_98_0002_70_0040_68_0013_80_0001
-4292.5	1.284	-71.893	2.433	0.835	q1_ao_3_e3_9_98_0002_70_0040_68_0013_80_0009
-4292.8	1.185	-75.631	2.412	0.835	q1_ao_3_e3_9_98_0002_70_0040_68_0018_80_0028
-4291.12	1.279	-75.326	2.436	0.835	q1_ao_3_e3_9_98_0002_70_0040_68_0018_80_0039
-4293.34	1.199	-73.35	2.412	0.835	q1_ao_3_e3_9_98_0002_70_0040_68_0022_80_0010
-4295.33	1.097	-73.307	2.432	0.835	q1_ao_3_e3_9_98_0002_70_0040_68_0022_80_0019
-4293.72	1.142	-75.276	2.427	0.835	q1_ao_3_e3_9_98_0002_70_0040_68_0023_80_0010
-4295.74	1.185	-70.242	2.381	0.835	q1_ao_3_e3_9_98_0002_70_0040_68_0023_80_0031
-4292.39	1.229	-73.323	2.42	0.835	q1_ao_3_e3_9_98_0002_70_0040_68_0023_80_0037
-4293.14	1.19	-74.52	2.392	0.835	q1_ao_3_e3_9_98_0002_70_0040_68_0035_80_0019
-4294.58	1.206	-74.178	2.429	0.835	q1_ao_3_e3_9_98_0002_70_0040_68_0035_80_0028
-4292.34	1.032	-73.578	2.439	0.835	q1_ao_3_e3_9_98_0002_70_0040_68_0037_80_0003
-4293.42	1.221	-74.398	2.432	0.835	q1_ao_3_e3_9_98_0002_70_0040_68_0037_80_0015
-4292.59	1.235	-72.473	2.421	0.835	q1_ao_3_e3_9_98_0002_70_0040_68_0037_80_0031
-4289.16	1.17	-71.209	2.39	0.835	q1_ao_3_e3_9_98_0002_70_0040_68_0038_80_0032
-4276.37	0.94	-73.174	2.259	0.835	q1_ao_6_e3_4_79_0001_84_0010_79_0012_85_0011
-4250.87	2.258	-74.273	2.344	0.835	q1_ao_7_e3_6_4_0001_90_0032_86_0016_91_0021
-4243.15	1.478	-75.681	2.391	0.835	q1_ao_7_e3_9_88_0001_91_0022_91_0035_94_0021
-4232.51	0.846	-66.767	2.424	0.823	q1_ao_12_e3_8_28_0002_17_0011
-4250.68	0.563	-72.819	2.498	0.823	q1_ao_19_e3_7_20_0002_45_0002
-4278.08	0.926	-67.89	2.251	0.823	q1_ao_20_e3_3_51_0001_52_0009
-4298.61	0.562	-68.061	2.413	0.823	q1_ao_3_e3_2_15_0001_64_0006
-4292.84	0.857	-68.769	2.449	0.823	q1_ao_3_e3_8_21_0001_69_0003
-4295.13	0.826	-67.124	2.432	0.823	q1_ao_3_e3_8_21_0001_69_0039
-4290.55	1.183	-67.948	2.368	0.823	q1_ao_3_e3_9_98_0002_70_0025
-4291.28	1.255	-71.188	2.417	0.823	q1_ao_3_e3_9_98_0002_70_0040
-4290.09	0.78	-69.025	2.412	0.823	q1_ao_11_e3_4_43_0001_9_0033_11_0027
-4278.06	0.794	-66.176	2.324	0.823	q1_ao_11_e3_6_70_0002_12_0006_13_0015
-4262.16	0.411	-75.152	2.606	0.823	q1_ao_12_e3_2_70_0002_16_0022_21_0010
-4262.28	1.914	-69.309	2.377	0.823	q1_ao_12_e3_8_28_0002_17_0009_21_0014
-4259.26	2.207	-66.388	2.403	0.823	q1_ao_12_e3_8_28_0002_17_0009_21_0040
-4244.44	0.829	-72.747	2.457	0.823	q1_ao_12_e3_8_28_0002_17_0011_21_0017
-4236.05	0.763	-70.89	2.482	0.823	q1_ao_12_e3_8_28_0002_17_0011_21_0026
-4243.84	0.854	-71.45	2.484	0.823	q1_ao_12_e3_8_28_0002_17_0011_21_0039
-4261.18	0.73	-73.11	2.451	0.823	q1_ao_12_e3_8_28_0002_17_0019_22_0004
-4259.93	0.737	-72.916	2.474	0.823	q1_ao_12_e3_8_28_0002_17_0019_22_0020
-4246.46	2.288	-71.329	2.381	0.823	q1_ao_13_e3_8_37_0002_20_0036_24_0010
-4245.95	1.148	-72.621	2.426	0.823	q1_ao_13_e3_8_37_0002_20_0036_24_0012
-4247.37	1.121	-70.131	2.425	0.823	q1_ao_13_e3_8_37_0002_20_0036_24_0014
-4247.34	1.086	-70.378	2.421	0.823	q1_ao_13_e3_8_37_0002_20_0036_24_0027
-4249.34	2.115	-73.086	2.384	0.823	q1_ao_13_e3_8_37_0002_20_0036_24_0037
-4258.75	0.904	-70.136	2.437	0.823	q1_ao_18_e3_6_33_0002_41_0038_37_0014
-4260.21	2.407	-70.119	2.42	0.823	q1_ao_19_e3_1_9_0001_43_0001_42_0020
-4257.2	0.924	-71.555	2.467	0.823	q1_ao_19_e3_1_9_0001_43_0001_42_0036
-4271.25	0.627	-73.756	2.474	0.823	q1_ao_19_e3_7_20_0002_45_0002_43_0008
-4273.37	0.624	-75.377	2.521	0.823	q1_ao_19_e3_7_20_0002_45_0002_43_0013
-4286.95	0.562	-73.855	2.299	0.823	q1_ao_20_e3_1_89_0001_50_0039_46_0011
-4283.15	0.93	-72.467	2.282	0.823	q1_ao_20_e3_3_51_0001_52_0009_47_0001
-4284.04	0.985	-73.648	2.273	0.823	q1_ao_20_e3_3_51_0001_52_0009_47_0026
-4284.06	0.959	-72.713	2.28	0.823	q1_ao_20_e3_3_51_0001_52_0009_47_0039
-4282.44	0.867	-68.808	2.282	0.823	q1_ao_20_e3_3_51_0001_52_0009_47_0040
-4285.28	0.784	-66.813	2.397	0.823	q1_ao_20_e3_8_10_0001_58_0014_55_0002
-4289.75	0.78	-67.549	2.381	0.823	q1_ao_20_e3_8_10_0001_58_0027_55_0024
-4282.23	1.203	-62.76	2.207	0.823	q1_ao_2_e3_6_59_0001_62_0013_57_0017
-4303.81	0.65	-68.549	2.386	0.823	q1_ao_3_e3_2_15_0001_64_0006_59_0020
-4304.6	0.583	-71.026	2.361	0.823	q1_ao_3_e3_2_15_0001_64_0006_59_0032
-4298.41	0.604	-71.141	2.418	0.823	q1_ao_3_e3_2_15_0001_64_0006_59_0040
-4295.18	0.717	-72.06	2.357	0.823	q1_ao_3_e3_2_15_0001_64_0013_60_0030
-4295.99	1.241	-74.259	2.334	0.823	q1_ao_3_e3_6_5_0001_67_0022_62_0012
-4293.69	0.975	-71.157	2.405	0.823	q1_ao_3_e3_8_21_0001_69_0003_62_0009
-4291.38	0.938	-69.178	2.417	0.823	q1_ao_3_e3_8_21_0001_69_0003_62_0011
-4292.39	0.98	-71.369	2.348	0.823	q1_ao_3_e3_8_21_0001_69_0003_62_0024
-4292.82	0.946	-70.797	2.447	0.823	q1_ao_3_e3_8_21_0001_69_0003_62_0027
-4292.85	0.96	-70.705	2.383	0.823	q1_ao_3_e3_8_21_0001_69_0003_62_0039
-4295.19	0.782	-71.534	2.387	0.823	q1_ao_3_e3_8_21_0001_69_0014_62_0034
-4295.28	0.895	-67.317	2.38	0.823	q1_ao_3_e3_8_21_0001_69_0021_63_0001
-4294.91	0.861	-68.928	2.385	0.823	q1_ao_3_e3_8_21_0001_69_0021_63_0033
-4298.27	0.84	-69.236	2.319	0.823	q1_ao_3_e3_8_21_0001_69_0021_63_0038
-4301.26	0.77	-73.206	2.462	0.823	q1_ao_3_e3_8_21_0001_69_0023_63_0004
-4298.17	0.81	-72.295	2.463	0.823	q1_ao_3_e3_8_21_0001_69_0023_63_0005
-4296.15	0.866	-68.047	2.402	0.823	q1_ao_3_e3_8_21_0001_69_0023_63_0022
-4294.75	0.839	-72.464	2.472	0.823	q1_ao_3_e3_8_21_0001_69_0023_63_0036
-4301.85	0.625	-70.322	2.348	0.823	q1_ao_3_e3_8_21_0001_69_0034_63_0001
-4302.08	0.732	-69.481	2.333	0.823	q1_ao_3_e3_8_21_0001_69_0034_63_0007
-4294.53	0.844	-71.426	2.436	0.823	q1_ao_3_e3_8_21_0001_69_0034_63_0034
-4294.94	0.756	-70.188	2.354	0.823	q1_ao_3_e3_8_21_0001_69_0034_63_0035
-4289.19	1.041	-69.778	2.407	0.823	q1_ao_3_e3_8_21_0001_69_0034_63_0039
-4300.65	0.827	-66.752	2.354	0.823	q1_ao_3_e3_8_21_0001_69_0039_63_0008
-4302.54	0.794	-69.53	2.302	0.823	q1_ao_3_e3_8_21_0001_69_0039_63_0027
-4290.57	0.828	-71.017	2.514	0.823	q1_ao_3_e3_8_21_0001_69_0040_63_0008
-4293.17	0.919	-70.436	2.387	0.823	q1_ao_3_e3_8_21_0001_69_0040_63_0010
-4292.27	1.015	-67.963	2.374	0.823	q1_ao_3_e3_8_21_0001_69_0040_63_0011
-4292.1	0.795	-68.979	2.488	0.823	q1_ao_3_e3_8_21_0001_69_0040_63_0026
-4301.6	0.683	-74.367	2.499	0.823	q1_ao_3_e3_8_65_0001_69_0006_64_0017
-4292.77	0.561	-69.623	2.523	0.823	q1_ao_3_e3_8_65_0001_69_0019_65_0013
-4289.38	0.92	-67.568	2.311	0.823	q1_ao_3_e3_8_86_0001_69_0025_65_0008
-4296.87	0.929	-67.633	2.247	0.823	q1_ao_3_e3_8_86_0001_69_0025_65_0009
-4301.91	0.997	-69.076	2.341	0.823	q1_ao_3_e3_9_22_0001_69_0005_66_0004
-4293.9	0.774	-71.778	2.427	0.823	q1_ao_3_e3_9_22_0001_69_0030_66_0024
-4294.24	1.431	-69.781	2.386	0.823	q1_ao_3_e3_9_98_0002_70_0018_68_0029
-4290.78	1.202	-68.975	2.386	0.823	q1_ao_3_e3_9_98_0002_70_0025_68_0007
-4289.06	1.358	-66.786	2.387	0.823	q1_ao_3_e3_9_98_0002_70_0025_68_0023
-4291.42	1.157	-69.057	2.322	0.823	q1_ao_3_e3_9_98_0002_70_0025_68_0036
-4289.43	1.256	-69.62	2.303	0.823	q1_ao_3_e3_9_98_0002_70_0025_68_0038
-4290.69	1.272	-73.161	2.417	0.823	q1_ao_3_e3_9_98_0002_70_0040_68_0004
-4291.52	1.29	-72.629	2.397	0.823	q1_ao_3_e3_9_98_0002_70_0040_68_0006
-4291.42	1.276	-72.47	2.409	0.823	q1_ao_3_e3_9_98_0002_70_0040_68_0013
-4287.52	1.371	-71.6	2.419	0.823	q1_ao_3_e3_9_98_0002_70_0040_68_0018
-4290.77	1.325	-72.589	2.399	0.823	q1_ao_3_e3_9_98_0002_70_0040_68_0019
-4289.68	1.306	-71.069	2.41	0.823	q1_ao_3_e3_9_98_0002_70_0040_68_0022
-4291.94	1.23	-73.531	2.404	0.823	q1_ao_3_e3_9_98_0002_70_0040_68_0023
-4290.1	1.291	-72.897	2.435	0.823	q1_ao_3_e3_9_98_0002_70_0040_68_0026
-4288.48	1.373	-72.477	2.427	0.823	q1_ao_3_e3_9_98_0002_70_0040_68_0035
-4290.36	1.311	-70.897	2.442	0.823	q1_ao_3_e3_9_98_0002_70_0040_68_0037
-4287.63	1.308	-71.242	2.407	0.823	q1_ao_3_e3_9_98_0002_70_0040_68_0038
-4239.52	2.383	-69.861	2.312	0.823	q1_ao_4_e3_9_61_0001_75_0027_72_0024
-4266.64	0.956	-70.59	2.412	0.823	q1_ao_6_e3_9_9_0002_88_0001_84_0015
-4249.01	2.061	-73.367	2.342	0.823	q1_ao_7_e3_6_4_0001_90_0032_86_0016
-4246.1	1.79	-74.657	2.335	0.823	q1_ao_7_e3_9_88_0001_91_0022_91_0018
-4241.86	0.875	-73.118	2.404	0.823	q1_ao_7_e3_9_88_0001_91_0022_91_0039
-4238.03	0.872	-70.451	2.422	0.823	q1_ao_7_e3_9_88_0001_91_0022_91_0040
-4284.08	0.981	-65.219	2.338	0.823	q1_ao_9_e3_4_62_0001_97_0009_94_0032
-4277.12	0.85	-69.489	2.363	0.823	q1_ao_9_e3_6_20_0002_98_0011_95_0003
-4276.79	0.795	-69.419	2.393	0.823	q1_ao_9_e3_6_20_0002_98_0011_95_0017
-4277.9	0.776	-68.432	2.366	0.823	q1_ao_9_e3_6_20_0002_98_0011_95_0021
-4280.72	2.089	-71.157	2.364	0.823	q1_ao_9_e3_6_3_0001_98_0008_95_0016
-4285.11	0.863	-71.355	2.309	0.823	q1_ao_9_e3_8_62_0002_100_0009_97_0037
-4282.32	0.695	-67.769	2.457	0.823	q1_ao_9_e3_8_77_0001_100_0028_98_0009
-4286.05	0.9	-68.088	2.304	0.823	q1_ao_11_e3_2_41_0002_7_0039_9_0018
-4284.95	0.837	-69.88	2.351	0.823	q1_ao_9_e3_8_62_0002_100_0009_97_0037_100_0015
-4296.99	1.373	-74.784	2.171	0.823	q1_ao_11_e3_9_38_0002_14_0031_19_0003_14_0020
-4255.24	0.377	-74.545	2.596	0.823	q1_ao_12_e3_2_70_0002_16_0022_21_0006_17_0026
-4259.49	0.436	-73.46	2.618	0.823	q1_ao_12_e3_2_70_0002_16_0022_21_0008_17_0007
-4263.79	0.672	-74.297	2.507	0.823	q1_ao_12_e3_2_70_0002_16_0022_21_0010_17_0020
-4257.94	0.38	-74.73	2.615	0.823	q1_ao_12_e3_2_70_0002_16_0022_21_0039_17_0010
-4254.23	0.787	-68.839	2.44	0.823	q1_ao_12_e3_8_28_0002_17_0011_21_0005_18_0015
-4237.75	0.826	-72.688	2.445	0.823	q1_ao_12_e3_8_28_0002_17_0011_21_0005_18_0030
-4242.28	0.96	-72.479	2.471	0.823	q1_ao_12_e3_8_28_0002_17_0011_21_0017_18_0016
-4238.34	0.85	-70.061	2.476	0.823	q1_ao_12_e3_8_28_0002_17_0011_21_0026_18_0022
-4237.83	0.877	-72.866	2.532	0.823	q1_ao_12_e3_8_28_0002_17_0011_21_0034_18_0011
-4241.82	0.874	-69.536	2.481	0.823	q1_ao_12_e3_8_28_0002_17_0011_21_0039_18_0011
-4238.36	0.785	-68.916	2.444	0.823	q1_ao_12_e3_8_28_0002_17_0011_21_0039_18_0013
-4238.94	0.939	-68.888	2.497	0.823	q1_ao_12_e3_8_28_0002_17_0011_21_0039_18_0019
-4238.96	0.915	-67.095	2.476	0.823	q1_ao_12_e3_8_28_0002_17_0011_21_0039_18_0022
-4261.52	0.752	-71.384	2.522	0.823	q1_ao_12_e3_8_28_0002_17_0019_22_0004_18_0003
-4263.31	0.676	-73.243	2.52	0.823	q1_ao_12_e3_8_28_0002_17_0019_22_0004_18_0005
-4261.2	0.648	-74.195	2.471	0.823	q1_ao_12_e3_8_28_0002_17_0019_22_0012_18_0018
-4256.77	0.79	-70.406	2.519	0.823	q1_ao_12_e3_8_28_0002_17_0019_22_0020_18_0009
-4257.81	0.718	-71.103	2.49	0.823	q1_ao_12_e3_8_28_0002_17_0019_22_0020_18_0011
-4239.47	0.719	-73.58	2.529	0.823	q1_ao_12_e3_8_28_0002_17_0019_22_0020_18_0036
-4238.48	0.756	-74.665	2.543	0.823	q1_ao_12_e3_8_28_0002_17_0019_22_0026_18_0006
-4258.07	0.614	-72.474	2.478	0.823	q1_ao_12_e3_8_28_0002_17_0019_22_0026_18_0013
-4245.81	1.036	-70.577	2.379	0.823	q1_ao_13_e3_2_14_0002_18_0038_23_0005_20_0024
-4245.25	1.005	-70.205	2.381	0.823	q1_ao_13_e3_2_14_0002_18_0038_23_0005_20_0028
-4249.57	2.228	-73.571	2.364	0.823	q1_ao_13_e3_8_37_0002_20_0025_24_0032_20_0013
-4251.76	2.094	-75.45	2.334	0.823	q1_ao_13_e3_8_37_0002_20_0025_24_0032_20_0021
-4251.38	2.312	-75.935	2.415	0.823	q1_ao_13_e3_8_37_0002_20_0025_24_0032_20_0029
-4249.61	2.164	-72.667	2.367	0.823	q1_ao_13_e3_8_37_0002_20_0025_24_0032_20_0032
-4249.75	2.097	-72.919	2.385	0.823	q1_ao_13_e3_8_37_0002_20_0036_24_0010_20_0003
-4243.95	2.333	-71.128	2.408	0.823	q1_ao_13_e3_8_37_0002_20_0036_24_0010_20_0006
-4249.43	2.089	-72.656	2.39	0.823	q1_ao_13_e3_8_37_0002_20_0036_24_0010_20_0013
-4247.15	2.467	-71.622	2.38	0.823	q1_ao_13_e3_8_37_0002_20_0036_24_0010_20_0016
-4247.31	2.214	-72.407	2.398	0.823	q1_ao_13_e3_8_37_0002_20_0036_24_0010_20_0031
-4250.29	2.085	-74.267	2.38	0.823	q1_ao_13_e3_8_37_0002_20_0036_24_0010_20_0034
-4249.69	2.201	-72.785	2.393	0.823	q1_ao_13_e3_8_37_0002_20_0036_24_0010_20_0038
-4248.34	1.056	-71.139	2.423	0.823	q1_ao_13_e3_8_37_0002_20_0036_24_0012_20_0005
-4244.77	1.007	-70.439	2.394	0.823	q1_ao_13_e3_8_37_0002_20_0036_24_0012_20_0014
-4248.33	2.16	-76.156	2.38	0.823	q1_ao_13_e3_8_37_0002_20_0036_24_0028_21_0013
-4250.12	2.157	-75.624	2.363	0.823	q1_ao_13_e3_8_37_0002_20_0036_24_0028_21_0018
-4249.85	2.086	-75.381	2.371	0.823	q1_ao_13_e3_8_37_0002_20_0036_24_0028_21_0028
-4244.79	2.094	-71.714	2.391	0.823	q1_ao_13_e3_8_37_0002_20_0036_24_0037_21_0011
-4249.24	2.098	-74.372	2.396	0.823	q1_ao_13_e3_8_37_0002_20_0036_24_0037_21_0035
-4277.89	0.536	-75.1	2.452	0.823	q1_ao_14_e3_3_60_0002_24_0009_26_0019_22_0025
-4280.55	0.535	-75.325	2.413	0.823	q1_ao_14_e3_3_60_0002_24_0009_26_0036_22_0039
-4279.08	0.598	-71.757	2.401	0.823	q1_ao_14_e3_3_98_0001_24_0039_26_0001_23_0029
-4276.54	0.439	-73.139	2.452	0.823	q1_ao_14_e3_4_83_0002_25_0003_26_0012_24_0018
-4283.57	0.51	-76.846	2.272	0.823	q1_ao_14_e3_4_83_0002_25_0003_26_0031_24_0007
-4282.61	0.643	-77.21	2.286	0.823	q1_ao_14_e3_4_83_0002_25_0027_26_0012_25_0002
-4282.43	0.571	-76.621	2.291	0.823	q1_ao_14_e3_4_83_0002_25_0027_26_0012_25_0037
-4283.57	0.943	-73.822	2.333	0.823	q1_ao_14_e3_8_13_0002_27_0027_29_0030_28_0002
-4280.27	0.869	-72.022	2.359	0.823	q1_ao_14_e3_8_13_0002_27_0037_29_0008_29_0006
-4284.14	0.835	-73.971	2.203	0.823	q1_ao_14_e3_9_51_0002_29_0009_32_0010_32_0039
-4284.56	0.72	-75.556	2.345	0.823	q1_ao_14_e3_9_51_0002_29_0009_32_0013_32_0007
-4284.7	0.726	-75.949	2.33	0.823	q1_ao_14_e3_9_51_0002_29_0009_32_0034_32_0012
-4283.55	0.751	-74.488	2.322	0.823	q1_ao_14_e3_9_51_0002_29_0009_32_0034_32_0036
-4280.97	0.92	-71.871	2.33	0.823	q1_ao_14_e3_9_91_0002_29_0020_32_0030_33_0013
-4246.61	1.338	-69.473	2.278	0.823	q1_ao_10_e3_8_95_0002_4_0028_4_0007_3_0035
-4257.86	0.81	-73.163	2.42	0.823	q1_ao_19_e3_1_9_0001_43_0001_42_0036_41_0013
-4259.56	0.8	-74.066	2.466	0.823	q1_ao_19_e3_1_9_0001_43_0001_42_0036_41_0014
-4260.56	0.813	-74.422	2.465	0.823	q1_ao_19_e3_1_9_0001_43_0001_42_0036_41_0018
-4257.42	0.93	-71.296	2.464	0.823	q1_ao_19_e3_1_9_0001_43_0001_42_0036_41_0021
-4260.53	0.808	-74.603	2.438	0.823	q1_ao_19_e3_1_9_0001_43_0001_42_0036_41_0038
-4263.3	0.788	-74.455	2.418	0.823	q1_ao_19_e3_1_9_0001_43_0001_42_0037_41_0017
-4273.62	0.677	-74.903	2.51	0.823	q1_ao_19_e3_7_20_0002_45_0002_43_0008_42_0001
-4273.05	0.73	-76.068	2.527	0.823	q1_ao_19_e3_7_20_0002_45_0002_43_0013_42_0004
-4271.78	0.656	-74.41	2.52	0.823	q1_ao_19_e3_7_20_0002_45_0002_43_0013_42_0005
-4271.53	0.708	-74.552	2.514	0.823	q1_ao_19_e3_7_20_0002_45_0002_43_0013_42_0035
-4289.54	0.607	-74.214	2.255	0.823	q1_ao_20_e3_1_89_0001_50_0039_46_0017_45_0004
-4288.81	0.846	-74.716	2.286	0.823	q1_ao_20_e3_3_51_0001_52_0009_47_0001_46_0024
-4286.96	1.09	-73.431	2.283	0.823	q1_ao_20_e3_3_51_0001_52_0009_47_0001_46_0025
-4286.77	0.828	-74.83	2.259	0.823	q1_ao_20_e3_3_51_0001_52_0009_47_0001_46_0036
-4281.86	0.783	-72.373	2.256	0.823	q1_ao_20_e3_3_51_0001_52_0009_47_0009_47_0026
-4283.86	0.979	-73.504	2.281	0.823	q1_ao_20_e3_3_51_0001_52_0009_47_0026_47_0017
-4280.75	0.957	-72.136	2.29	0.823	q1_ao_20_e3_3_51_0001_52_0009_47_0026_47_0032
-4283.34	0.986	-72.356	2.305	0.823	q1_ao_20_e3_3_51_0001_52_0009_47_0031_47_0008
-4287.45	0.917	-75.856	2.287	0.823	q1_ao_20_e3_3_51_0001_52_0009_47_0031_47_0018
-4288.75	0.846	-74.323	2.283	0.823	q1_ao_20_e3_3_51_0001_52_0009_47_0031_47_0023
-4286.63	0.863	-73.757	2.289	0.823	q1_ao_20_e3_3_51_0001_52_0009_47_0031_47_0039
-4285.79	0.856	-75.007	2.286	0.823	q1_ao_20_e3_3_51_0001_52_0009_47_0034_47_0011
-4285.73	0.812	-74.181	2.299	0.823	q1_ao_20_e3_3_51_0001_52_0009_47_0034_47_0015
-4287.22	0.895	-75.105	2.284	0.823	q1_ao_20_e3_3_51_0001_52_0009_47_0039_47_0025
-4287.9	0.67	-72.888	2.335	0.823	q1_ao_20_e3_6_6_0001_55_0009_50_0014_49_0026
-4288.96	0.747	-72.326	2.29	0.823	q1_ao_20_e3_6_90_0001_56_0018_51_0003_50_0001
-4298.32	0.904	-74.061	2.362	0.823	q1_ao_2_e3_6_59_0001_62_0012_57_0011_56_0015
-4288.41	0.917	-72.057	2.287	0.823	q1_ao_2_e3_6_59_0001_62_0012_57_0011_56_0035
-4291.39	1.026	-72.953	2.383	0.823	q1_ao_2_e3_6_59_0001_62_0023_58_0006_56_0035
-4285.87	1.01	-70.194	2.362	0.823	q1_ao_2_e3_6_59_0001_62_0023_58_0006_56_0036
-4299.43	0.948	-81.08	2.371	0.823	q1_ao_2_e3_8_7_0001_63_0017_59_0015_58_0018
-4295.2	0.851	-74.213	2.188	0.823	q1_ao_11_e3_1_60_0002_5_0031_8_0003_5_0020
-4302.84	0.992	-72.406	2.379	0.823	q1_ao_3_e3_1_21_0001_64_0020_59_0014_60_0038
-4294.97	0.728	-73.111	2.343	0.823	q1_ao_3_e3_2_15_0001_64_0001_59_0002_61_0018
-4300.72	0.625	-72.498	2.352	0.823	q1_ao_3_e3_2_15_0001_64_0001_59_0011_61_0011
-4301.29	0.527	-74.202	2.373	0.823	q1_ao_3_e3_2_15_0001_64_0001_59_0011_61_0017
-4296.05	0.725	-72.71	2.305	0.823	q1_ao_3_e3_2_15_0001_64_0001_59_0029_61_0007
-4295.18	0.597	-72.969	2.364	0.823	q1_ao_3_e3_2_15_0001_64_0006_59_0032_61_0009
-4295.93	0.617	-71.235	2.377	0.823	q1_ao_3_e3_2_15_0001_64_0006_59_0032_61_0016
-4297.12	0.522	-71.888	2.376	0.823	q1_ao_3_e3_2_15_0001_64_0006_59_0032_61_0029
-4303.78	0.626	-71.25	2.358	0.823	q1_ao_3_e3_2_15_0001_64_0006_59_0032_61_0034
-4298.07	0.625	-71.968	2.41	0.823	q1_ao_3_e3_2_15_0001_64_0006_59_0040_61_0005
-4304.24	0.575	-72.588	2.367	0.823	q1_ao_3_e3_2_15_0001_64_0006_59_0040_61_0010
-4298.83	0.644	-71.981	2.416	0.823	q1_ao_3_e3_2_15_0001_64_0006_59_0040_61_0022
-4296.4	0.676	-58.319	2.441	0.823	q1_ao_3_e3_2_15_0001_64_0006_59_0040_61_0026
-4298.97	0.553	-75.64	2.321	0.823	q1_ao_3_e3_2_15_0001_64_0013_60_0009_62_0016
-4293.77	0.908	-69.798	2.371	0.823	q1_ao_3_e3_2_15_0001_64_0034_60_0021_62_0038
-4297.43	0.651	-64.49	2.312	0.823	q1_ao_3_e3_2_15_0001_64_0038_60_0027_64_0008
-4302.74	0.724	-74.25	2.292	0.823	q1_ao_3_e3_2_15_0001_64_0038_60_0027_64_0031
-4297.19	0.792	-72.318	2.345	0.823	q1_ao_3_e3_2_15_0001_64_0038_60_0027_64_0037
-4295.35	0.954	-69.737	2.279	0.823	q1_ao_3_e3_2_8_0001_65_0025_60_0016_64_0008
-4305.14	0.808	-73.653	2.287	0.823	q1_ao_3_e3_2_8_0001_65_0025_60_0023_64_0023
-4305.8	0.864	-75.655	2.228	0.823	q1_ao_3_e3_6_5_0001_67_0022_62_0006_68_0003
-4297.61	1.418	-74.031	2.348	0.823	q1_ao_3_e3_6_5_0001_67_0022_62_0006_68_0024
-4298.89	1.071	-70.336	2.313	0.823	q1_ao_3_e3_6_5_0001_67_0022_62_0012_68_0004
-4301.73	1.196	-72.922	2.318	0.823	q1_ao_3_e3_6_5_0001_67_0022_62_0012_68_0016
-4302.2	1.153	-73.723	2.266	0.823	q1_ao_3_e3_6_5_0001_67_0022_62_0012_68_0034
-4298.37	1.217	-74.202	2.287	0.823	q1_ao_3_e3_6_5_0001_67_0022_62_0017_68_0013
-4289.98	1.102	-75.476	2.294	0.823	q1_ao_3_e3_6_5_0001_67_0022_62_0017_68_0023
-4292.27	0.616	-71.563	2.341	0.823	q1_ao_3_e3_6_5_0001_67_0040_62_0004_68_0034
-4302.2	0.67	-71.031	2.351	0.823	q1_ao_3_e3_6_5_0001_67_0040_62_0038_69_0008
-4302.45	0.77	-71.996	2.319	0.823	q1_ao_3_e3_6_5_0001_67_0040_62_0040_69_0029
-4295.23	0.896	-71.619	2.361	0.823	q1_ao_3_e3_7_37_0002_68_0028_62_0040_69_0015
-4293.77	0.831	-71.379	2.336	0.823	q1_ao_3_e3_7_37_0002_68_0028_62_0040_69_0016
-4296.51	0.926	-73.195	2.349	0.823	q1_ao_3_e3_7_37_0002_68_0028_62_0040_69_0019
-4299.92	0.883	-69.145	2.343	0.823	q1_ao_3_e3_7_37_0002_68_0028_62_0040_69_0022
-4293.82	0.836	-71.153	2.312	0.823	q1_ao_3_e3_7_37_0002_68_0028_62_0040_69_0035
-4296.53	0.887	-72.049	2.356	0.823	q1_ao_3_e3_7_37_0002_68_0028_62_0040_69_0039
-4293.51	0.878	-71.965	2.3	0.823	q1_ao_3_e3_7_37_0002_68_0028_62_0040_69_0040
-4290.16	0.902	-69.068	2.398	0.823	q1_ao_3_e3_7_5_0001_68_0017_62_0017_70_0032
-4291.61	0.955	-71.501	2.335	0.823	q1_ao_3_e3_8_21_0001_69_0003_62_0009_70_0007
-4293.38	0.982	-72.734	2.378	0.823	q1_ao_3_e3_8_21_0001_69_0003_62_0009_70_0014
-4291.47	0.961	-70.693	2.33	0.823	q1_ao_3_e3_8_21_0001_69_0003_62_0009_70_0017
-4290.82	1.029	-71.012	2.385	0.823	q1_ao_3_e3_8_21_0001_69_0003_62_0009_70_0018
-4291.69	0.921	-71.33	2.346	0.823	q1_ao_3_e3_8_21_0001_69_0003_62_0009_70_0019
-4290.06	0.968	-69.972	2.396	0.823	q1_ao_3_e3_8_21_0001_69_0003_62_0009_70_0020
-4294.08	0.939	-72.511	2.351	0.823	q1_ao_3_e3_8_21_0001_69_0003_62_0009_70_0022
-4292.62	0.968	-71.709	2.372	0.823	q1_ao_3_e3_8_21_0001_69_0003_62_0009_70_0026
-4294.55	0.798	-72.772	2.365	0.823	q1_ao_3_e3_8_21_0001_69_0003_62_0024_70_0014
-4294.17	1.008	-71.31	2.35	0.823	q1_ao_3_e3_8_21_0001_69_0003_62_0024_70_0025
-4291.27	0.946	-70.707	2.324	0.823	q1_ao_3_e3_8_21_0001_69_0003_62_0024_70_0033
-4297.4	0.916	-69.003	2.383	0.823	q1_ao_3_e3_8_21_0001_69_0003_62_0027_70_0009
-4293.15	1.006	-68.965	2.385	0.823	q1_ao_3_e3_8_21_0001_69_0003_62_0027_70_0012
-4292.09	0.913	-69.501	2.417	0.823	q1_ao_3_e3_8_21_0001_69_0003_62_0027_70_0014
-4288.83	1.003	-68.131	2.405	0.823	q1_ao_3_e3_8_21_0001_69_0003_62_0027_70_0015
-4292.03	1.014	-71.846	2.394	0.823	q1_ao_3_e3_8_21_0001_69_0003_62_0027_70_0018
-4290.65	0.948	-69.844	2.357	0.823	q1_ao_3_e3_8_21_0001_69_0003_62_0027_70_0021
-4291.69	0.983	-69.003	2.443	0.823	q1_ao_3_e3_8_21_0001_69_0003_62_0027_70_0030
-4291.15	0.972	-70.363	2.45	0.823	q1_ao_3_e3_8_21_0001_69_0003_62_0027_70_0033
-4294.29	0.91	-69.032	2.398	0.823	q1_ao_3_e3_8_21_0001_69_0003_62_0027_70_0035
-4288.53	1.025	-68.53	2.449	0.823	q1_ao_3_e3_8_21_0001_69_0003_62_0027_70_0039
-4292.06	1.01	-69.134	2.351	0.823	q1_ao_3_e3_8_21_0001_69_0003_62_0037_70_0005
-4294.35	0.964	-72.219	2.335	0.823	q1_ao_3_e3_8_21_0001_69_0003_62_0037_70_0023
-4294.3	0.838	-71.442	2.357	0.823	q1_ao_3_e3_8_21_0001_69_0014_62_0034_71_0017
-4297.07	0.731	-72.945	2.346	0.823	q1_ao_3_e3_8_21_0001_69_0014_62_0035_71_0018
-4296.49	0.524	-72.967	2.332	0.823	q1_ao_3_e3_8_21_0001_69_0014_62_0035_71_0038
-4297.68	0.806	-67.478	2.303	0.823	q1_ao_3_e3_8_21_0001_69_0021_63_0040_71_0004
-4299.99	0.764	-69.04	2.342	0.823	q1_ao_3_e3_8_21_0001_69_0021_63_0040_71_0010
-4293.59	0.787	-73.413	2.377	0.823	q1_ao_3_e3_8_21_0001_69_0021_63_0040_71_0013
-4294.86	0.682	-69.664	2.346	0.823	q1_ao_3_e3_8_21_0001_69_0021_63_0040_71_0031
-4294.27	0.841	-73.408	2.37	0.823	q1_ao_3_e3_8_21_0001_69_0021_63_0040_71_0038
-4289.69	0.8	-71.806	2.421	0.823	q1_ao_3_e3_8_21_0001_69_0023_63_0036_71_0001
-4290.54	0.823	-70.657	2.405	0.823	q1_ao_3_e3_8_21_0001_69_0023_63_0036_71_0007
-4291.83	0.893	-71.504	2.428	0.823	q1_ao_3_e3_8_21_0001_69_0023_63_0036_71_0008
-4291.36	0.914	-72.986	2.439	0.823	q1_ao_3_e3_8_21_0001_69_0023_63_0036_71_0011
-4300.24	0.664	-66.154	2.269	0.823	q1_ao_3_e3_8_21_0001_69_0027_63_0016_71_0023
-4291.99	0.813	-66.508	2.332	0.823	q1_ao_3_e3_8_21_0001_69_0027_63_0016_71_0026
-4289.81	0.96	-70.15	2.443	0.823	q1_ao_3_e3_8_21_0001_69_0034_63_0034_72_0008
-4291	0.962	-68.085	2.399	0.823	q1_ao_3_e3_8_21_0001_69_0034_63_0034_72_0015
-4292.51	0.946	-68.904	2.418	0.823	q1_ao_3_e3_8_21_0001_69_0034_63_0034_72_0016
-4293.94	0.968	-71.575	2.435	0.823	q1_ao_3_e3_8_21_0001_69_0034_63_0034_72_0023
-4297.83	0.83	-68.32	2.403	0.823	q1_ao_3_e3_8_21_0001_69_0034_63_0034_72_0027
-4294.62	0.815	-72.725	2.48	0.823	q1_ao_3_e3_8_21_0001_69_0040_63_0008_72_0005
-4291.58	0.775	-70.639	2.489	0.823	q1_ao_3_e3_8_21_0001_69_0040_63_0008_72_0016
-4293.18	1.026	-72.409	2.367	0.823	q1_ao_3_e3_8_21_0001_69_0040_63_0008_72_0032
-4295.69	0.989	-71.539	2.33	0.823	q1_ao_3_e3_8_21_0001_69_0040_63_0008_72_0036
-4292.07	0.722	-70.701	2.485	0.823	q1_ao_3_e3_8_21_0001_69_0040_63_0040_72_0005
-4288.57	0.813	-70.456	2.509	0.823	q1_ao_3_e3_8_21_0001_69_0040_63_0040_72_0016
-4293.55	0.735	-79.119	2.477	0.823	q1_ao_3_e3_8_65_0001_69_0002_64_0001_74_0015
-4292.51	0.898	-78.525	2.452	0.823	q1_ao_3_e3_8_65_0001_69_0002_64_0001_74_0031
-4295.65	0.725	-78.65	2.428	0.823	q1_ao_3_e3_8_65_0001_69_0002_64_0001_74_0034
-4302.35	0.84	-78.388	2.49	0.823	q1_ao_3_e3_8_65_0001_69_0002_64_0017_75_0005
-4299.56	0.708	-73.178	2.495	0.823	q1_ao_3_e3_8_65_0001_69_0006_64_0017_75_0003
-4298.34	0.722	-72.72	2.497	0.823	q1_ao_3_e3_8_65_0001_69_0006_64_0017_75_0011
-4296.97	0.714	-73.558	2.491	0.823	q1_ao_3_e3_8_65_0001_69_0006_64_0017_75_0021
-4302.2	0.697	-74.864	2.516	0.823	q1_ao_3_e3_8_65_0001_69_0006_64_0017_75_0022
-4298.03	0.758	-73.3	2.497	0.823	q1_ao_3_e3_8_65_0001_69_0006_64_0017_75_0025
-4302.09	0.67	-74.489	2.503	0.823	q1_ao_3_e3_8_65_0001_69_0006_64_0017_75_0029
-4299.04	0.627	-72.208	2.398	0.823	q1_ao_3_e3_8_65_0001_69_0006_64_0029_76_0036
-4302.28	0.672	-77.266	2.487	0.823	q1_ao_3_e3_8_65_0001_69_0006_64_0031_76_0038
-4299.66	0.695	-76.209	2.488	0.823	q1_ao_3_e3_8_65_0001_69_0006_64_0031_76_0040
-4303.48	0.627	-74.203	2.289	0.823	q1_ao_3_e3_9_22_0001_69_0006_66_0036_76_0022
-4293.87	0.816	-71.036	2.37	0.823	q1_ao_3_e3_9_22_0001_69_0030_66_0030_77_0001
-4294.63	0.878	-74.344	2.295	0.823	q1_ao_3_e3_9_22_0001_69_0030_66_0030_77_0018
-4290.48	1.181	-71.087	2.408	0.823	q1_ao_3_e3_9_98_0002_70_0003_67_0003_78_0008
-4293.24	1.088	-73.849	2.417	0.823	q1_ao_3_e3_9_98_0002_70_0003_67_0003_78_0028
-4294.86	1.213	-70.878	2.277	0.823	q1_ao_3_e3_9_98_0002_70_0003_67_0003_78_0038
-4296.68	1.015	-73.261	2.291	0.823	q1_ao_3_e3_9_98_0002_70_0006_67_0030_79_0008
-4296.46	0.979	-73.385	2.319	0.823	q1_ao_3_e3_9_98_0002_70_0006_67_0030_79_0015
-4296.98	0.998	-73.249	2.299	0.823	q1_ao_3_e3_9_98_0002_70_0006_67_0030_79_0036
-4290.12	0.965	-71.659	2.317	0.823	q1_ao_3_e3_9_98_0002_70_0006_67_0030_79_0039
-4286.42	1.075	-71.385	2.374	0.823	q1_ao_3_e3_9_98_0002_70_0017_67_0022_79_0024
-4288.55	1.321	-69.016	2.397	0.823	q1_ao_3_e3_9_98_0002_70_0017_67_0022_79_0026
-4291.31	1.217	-71.618	2.337	0.823	q1_ao_3_e3_9_98_0002_70_0018_68_0001_79_0016
-4291.49	1.302	-71.157	2.417	0.823	q1_ao_3_e3_9_98_0002_70_0025_68_0009_79_0003
-4292.76	1.074	-72.813	2.427	0.823	q1_ao_3_e3_9_98_0002_70_0025_68_0009_79_0018
-4290.55	1.326	-72.138	2.32	0.823	q1_ao_3_e3_9_98_0002_70_0025_68_0009_79_0034
-4290.61	1.333	-72.116	2.309	0.823	q1_ao_3_e3_9_98_0002_70_0025_68_0009_79_0035
-4293.51	1.19	-71.435	2.4	0.823	q1_ao_3_e3_9_98_0002_70_0025_68_0020_79_0010
-4292.78	1.23	-71.621	2.304	0.823	q1_ao_3_e3_9_98_0002_70_0025_68_0020_79_0037
-4289.28	1.276	-70.266	2.375	0.823	q1_ao_3_e3_9_98_0002_70_0025_68_0020_79_0038
-4294.92	1.588	-73.121	2.307	0.823	q1_ao_3_e3_9_98_0002_70_0035_68_0024_79_0008
-4294.48	1.507	-73.771	2.309	0.823	q1_ao_3_e3_9_98_0002_70_0035_68_0024_79_0036
-4292.21	1.632	-70.483	2.322	0.823	q1_ao_3_e3_9_98_0002_70_0035_68_0024_79_0038
-4291.8	1.46	-69.574	2.293	0.823	q1_ao_3_e3_9_98_0002_70_0035_68_0024_79_0039
-4293.7	1.264	-70.171	2.372	0.823	q1_ao_3_e3_9_98_0002_70_0035_68_0029_79_0008
-4292.35	1.21	-75.005	2.402	0.823	q1_ao_3_e3_9_98_0002_70_0040_68_0001_79_0001
-4291.32	1.256	-71.848	2.384	0.823	q1_ao_3_e3_9_98_0002_70_0040_68_0001_79_0012
-4292.06	1.335	-73.614	2.429	0.823	q1_ao_3_e3_9_98_0002_70_0040_68_0001_79_0015
-4291.64	1.241	-71.86	2.317	0.823	q1_ao_3_e3_9_98_0002_70_0040_68_0001_79_0020
-4292.12	1.297	-73.865	2.429	0.823	q1_ao_3_e3_9_98_0002_70_0040_68_0001_79_0026
-4290.1	1.319	-73.051	2.393	0.823	q1_ao_3_e3_9_98_0002_70_0040_68_0001_79_0033
-4292.01	1.201	-74.074	2.449	0.823	q1_ao_3_e3_9_98_0002_70_0040_68_0004_79_0009
-4293.54	1.228	-74.054	2.41	0.823	q1_ao_3_e3_9_98_0002_70_0040_68_0004_79_0015
-4291.4	1.291	-73.038	2.428	0.823	q1_ao_3_e3_9_98_0002_70_0040_68_0004_79_0016
-4292.35	1.24	-74.553	2.407	0.823	q1_ao_3_e3_9_98_0002_70_0040_68_0004_79_0019
-4290.51	1.227	-76.44	2.426	0.823	q1_ao_3_e3_9_98_0002_70_0040_68_0004_79_0024
-4291.75	1.131	-74.878	2.426	0.823	q1_ao_3_e3_9_98_0002_70_0040_68_0004_79_0029
-4292.7	1.365	-73.299	2.439	0.823	q1_ao_3_e3_9_98_0002_70_0040_68_0004_79_0033
-4289.79	1.325	-70.181	2.423	0.823	q1_ao_3_e3_9_98_0002_70_0040_68_0004_79_0037
-4286.13	1.289	-73.737	2.408	0.823	q1_ao_3_e3_9_98_0002_70_0040_68_0006_79_0028
-4292.98	1.191	-72.699	2.425	0.823	q1_ao_3_e3_9_98_0002_70_0040_68_0006_79_0036
-4291.47	0.737	-74.739	2.2	0.823	q1_ao_11_e3_2_41_0002_7_0017_8_0011_7_0011
-4302.17	0.82	-80.067	2.24	0.823	q1_ao_11_e3_2_41_0002_7_0017_8_0011_7_0032
-4291.1	0.678	-71.436	2.337	0.823	q1_ao_11_e3_3_61_0002_9_0035_10_0025_7_0032
-4291.28	1.356	-72.09	2.433	0.823	q1_ao_3_e3_9_98_0002_70_0040_68_0013_80_0006
-4290.27	1.322	-72.208	2.424	0.823	q1_ao_3_e3_9_98_0002_70_0040_68_0013_80_0011
-4289.01	1.348	-72.359	2.434	0.823	q1_ao_3_e3_9_98_0002_70_0040_68_0013_80_0018
-4294.4	1.196	-72.539	2.434	0.823	q1_ao_3_e3_9_98_0002_70_0040_68_0013_80_0023
-4290.75	1.308	-73.071	2.404	0.823	q1_ao_3_e3_9_98_0002_70_0040_68_0013_80_0032
-4292.17	1.321	-72.015	2.413	0.823	q1_ao_3_e3_9_98_0002_70_0040_68_0013_80_0034
-4292.98	0.924	-71.253	2.356	0.823	q1_ao_3_e3_9_98_0002_70_0040_68_0013_80_0039
-4291.31	1.318	-74.716	2.436	0.823	q1_ao_3_e3_9_98_0002_70_0040_68_0018_80_0025
-4292.14	1.359	-74.167	2.388	0.823	q1_ao_3_e3_9_98_0002_70_0040_68_0019_80_0008
-4294.57	1.28	-74.528	2.43	0.823	q1_ao_3_e3_9_98_0002_70_0040_68_0019_80_0026
-4293.29	1.406	-71.956	2.406	0.823	q1_ao_3_e3_9_98_0002_70_0040_68_0019_80_0039
-4293.35	1.225	-73.981	2.433	0.823	q1_ao_3_e3_9_98_0002_70_0040_68_0022_80_0001
-4293.63	1.114	-73.71	2.428	0.823	q1_ao_3_e3_9_98_0002_70_0040_68_0022_80_0004
-4292.53	1.315	-71.912	2.411	0.823	q1_ao_3_e3_9_98_0002_70_0040_68_0022_80_0007
-4289.29	1.282	-72.858	2.447	0.823	q1_ao_3_e3_9_98_0002_70_0040_68_0022_80_0017
-4291.19	1.198	-72.803	2.432	0.823	q1_ao_3_e3_9_98_0002_70_0040_68_0022_80_0018
-4293.02	1.167	-73.209	2.388	0.823	q1_ao_3_e3_9_98_0002_70_0040_68_0023_80_0003
-4291.97	1.303	-72.81	2.428	0.823	q1_ao_3_e3_9_98_0002_70_0040_68_0023_80_0004
-4292.31	1.215	-74.618	2.433	0.823	q1_ao_3_e3_9_98_0002_70_0040_68_0023_80_0016
-4293.82	1.195	-73.273	2.431	0.823	q1_ao_3_e3_9_98_0002_70_0040_68_0023_80_0028
-4291.09	1.26	-72.466	2.428	0.823	q1_ao_3_e3_9_98_0002_70_0040_68_0023_80_0039
-4291.62	1.338	-72.92	2.401	0.823	q1_ao_3_e3_9_98_0002_70_0040_68_0026_80_0015
-4287.83	1.405	-70.853	2.443	0.823	q1_ao_3_e3_9_98_0002_70_0040_68_0026_80_0023
-4293.65	1.354	-73.079	2.456	0.823	q1_ao_3_e3_9_98_0002_70_0040_68_0026_80_0025
-4292.99	1.275	-72.817	2.45	0.823	q1_ao_3_e3_9_98_0002_70_0040_68_0026_80_0026
-4290.76	1.406	-73.192	2.436	0.823	q1_ao_3_e3_9_98_0002_70_0040_68_0026_80_0036
-4293.77	1.198	-73.956	2.42	0.823	q1_ao_3_e3_9_98_0002_70_0040_68_0035_80_0008
-4290.55	1.204	-72.138	2.436	0.823	q1_ao_3_e3_9_98_0002_70_0040_68_0037_80_0010
-4291.78	1.38	-72.637	2.449	0.823	q1_ao_3_e3_9_98_0002_70_0040_68_0037_80_0019
-4292.49	1.22	-73.42	2.441	0.823	q1_ao_3_e3_9_98_0002_70_0040_68_0037_80_0021
-4290.3	1.184	-73.292	2.42	0.823	q1_ao_3_e3_9_98_0002_70_0040_68_0037_80_0026
-4293.31	1.243	-74.927	2.433	0.823	q1_ao_3_e3_9_98_0002_70_0040_68_0037_80_0033
-4291.14	1.397	-72.363	2.441	0.823	q1_ao_3_e3_9_98_0002_70_0040_68_0037_80_0034
-4291.43	1.304	-72.676	2.431	0.823	q1_ao_3_e3_9_98_0002_70_0040_68_0037_80_0040
-4293	1.306	-73.847	2.433	0.823	q1_ao_3_e3_9_98_0002_70_0040_68_0038_80_0002
-4293.44	1.251	-74.604	2.427	0.823	q1_ao_3_e3_9_98_0002_70_0040_68_0038_80_0008
-4292.71	1.141	-75.788	2.427	0.823	q1_ao_3_e3_9_98_0002_70_0040_68_0038_80_0012
-4292.33	1.297	-73.459	2.429	0.823	q1_ao_3_e3_9_98_0002_70_0040_68_0038_80_0017
-4287.82	1.416	-70.38	2.413	0.823	q1_ao_3_e3_9_98_0002_70_0040_68_0038_80_0018
-4282.15	1.41	-71.739	2.449	0.823	q1_ao_3_e3_9_98_0002_70_0040_68_0038_80_0025
-4290.18	1.358	-72.846	2.445	0.823	q1_ao_3_e3_9_98_0002_70_0040_68_0038_80_0031
-4292.37	1.265	-72.884	2.418	0.823	q1_ao_3_e3_9_98_0002_70_0040_68_0038_80_0035
-4288.74	1.403	-72.52	2.457	0.823	q1_ao_3_e3_9_98_0002_70_0040_68_0038_80_0039
-4238.78	0.8	-71.706	2.358	0.823	q1_ao_4_e3_5_59_0002_73_0018_69_0009_81_0029
-4225.73	0.926	-72.363	2.377	0.823	q1_ao_4_e3_5_59_0002_73_0018_69_0038_81_0017
-4275.61	1.399	-71.161	2.299	0.823	q1_ao_6_e3_4_79_0001_84_0010_79_0004_84_0006
-4268.43	0.887	-72.146	2.444	0.823	q1_ao_6_e3_4_79_0001_84_0010_79_0005_84_0004
-4274.06	1.213	-72.784	2.297	0.823	q1_ao_6_e3_4_79_0001_84_0010_79_0012_85_0039
-4283.89	1.125	-71.906	2.335	0.823	q1_ao_6_e3_4_79_0001_84_0010_79_0022_85_0039
-4275.32	1.22	-73.028	2.338	0.823	q1_ao_6_e3_4_79_0001_84_0010_79_0038_85_0023
-4268.1	0.517	-75.903	2.324	0.823	q1_ao_6_e3_9_68_0002_87_0024_84_0020_86_0035
-4281.03	0.514	-74.003	2.39	0.823	q1_ao_6_e3_9_9_0002_88_0001_84_0039_86_0007
-4266.43	0.435	-72.478	2.386	0.823	q1_ao_6_e3_9_9_0002_88_0001_84_0039_86_0037
-4251.98	2.346	-74.78	2.345	0.823	q1_ao_7_e3_6_4_0001_90_0032_86_0016_91_0023
-4248.28	2.239	-73.622	2.346	0.823	q1_ao_7_e3_6_4_0001_90_0032_86_0016_91_0040
-4240.31	0.795	-72.889	2.453	0.823	q1_ao_7_e3_9_88_0001_91_0022_91_0003_93_0010
-4241.29	1.263	-72.902	2.36	0.823	q1_ao_7_e3_9_88_0001_91_0022_91_0003_93_0034
-4242.52	1.566	-70.537	2.329	0.823	q1_ao_7_e3_9_88_0001_91_0022_91_0018_94_0025
-4243.67	1.37	-73.871	2.395	0.823	q1_ao_7_e3_9_88_0001_91_0022_91_0039_94_0007
-4243.31	0.87	-77.135	2.409	0.823	q1_ao_7_e3_9_88_0001_91_0022_91_0039_94_0023
-4244.95	0.861	-76.439	2.407	0.823	q1_ao_7_e3_9_88_0001_91_0022_91_0039_94_0029
-4245.94	0.847	-76.137	2.406	0.823	q1_ao_7_e3_9_88_0001_91_0022_91_0039_94_0032
-4242.42	0.886	-75.293	2.41	0.823	q1_ao_7_e3_9_88_0001_91_0022_91_0039_94_0033
-4245.5	0.854	-75.783	2.411	0.823	q1_ao_7_e3_9_88_0001_91_0022_91_0039_94_0036
-4276.19	0.783	-77.285	2.388	0.823	q1_ao_9_e3_5_38_0002_98_0011_95_0016_97_0009
-4284.11	0.561	-81.668	2.382	0.823	q1_ao_9_e3_5_38_0002_98_0011_95_0016_97_0023
-4280.1	0.63	-72.902	2.353	0.823	q1_ao_9_e3_6_20_0002_98_0011_95_0035_97_0004
-4288.6	0.847	-76.281	2.378	0.823	q1_ao_9_e3_6_37_0001_98_0040_96_0007_98_0003
-4286.81	0.865	-78.243	2.341	0.823	q1_ao_9_e3_6_37_0001_98_0040_96_0007_98_0032
-4285.31	0.881	-74.233	2.398	0.823	q1_ao_9_e3_6_37_0001_98_0040_96_0007_98_0034
-4288.61	0.771	-76.422	2.369	0.823	q1_ao_9_e3_6_37_0001_98_0040_96_0007_98_0039
-4287.78	0.868	-76.413	2.355	0.823	q1_ao_9_e3_6_37_0001_98_0040_96_0009_98_0026
-4282.26	2.102	-73.711	2.339	0.823	q1_ao_9_e3_6_3_0001_98_0008_95_0016_98_0008
-4285.64	2.08	-75.512	2.331	0.823	q1_ao_9_e3_6_3_0001_98_0008_95_0016_98_0017
-4283.64	2.185	-74.54	2.337	0.823	q1_ao_9_e3_6_3_0001_98_0008_95_0016_98_0040
-4233.67	0.796	-68.539	2.48	0.81	q1_ao_12_e3_8_28_0002_17_0019
-4251.6	1.054	-68.211	2.471	0.81	q1_ao_18_e3_6_33_0002_41_0040
-4240.85	1.053	-76.531	2.457	0.81	q1_ao_1_e3_4_22_0002_46_0027
-4247.08	0.972	-67.298	2.362	0.81	q1_ao_10_e3_8_95_0002_4_0028
-4286.44	0.922	-65.765	2.324	0.81	q1_ao_20_e3_6_90_0001_56_0037
-4297.18	0.782	-72.06	2.42	0.81	q1_ao_3_e3_1_21_0001_64_0020
-4300.11	1.03	-75.467	2.348	0.81	q1_ao_3_e3_6_5_0001_67_0022
-4303.45	0.977	-71.697	2.398	0.81	q1_ao_3_e3_7_26_0001_68_0006
-4295.11	0.804	-70.022	2.438	0.81	q1_ao_3_e3_8_21_0001_69_0014
-4289.84	1.195	-61.362	2.442	0.81	q1_ao_3_e3_9_98_0002_70_0026
-4275.04	0.909	-58.103	2.182	0.81	q1_ao_9_e3_6_37_0001_98_0037
-4295.72	0.762	-71.272	2.415	0.81	q1_ao_11_e3_4_43_0001_9_0033
-4280.94	0.586	-66.579	2.483	0.81	q1_ao_9_e3_9_54_0002_100_0037_100_0029
-4289.16	0.724	-69.76	2.505	0.81	q1_ao_11_e3_4_43_0001_9_0001_10_0020
-4293.94	0.966	-70.734	2.294	0.81	q1_ao_11_e3_4_43_0001_9_0001_10_0023
-4290.38	0.781	-68.566	2.403	0.81	q1_ao_11_e3_4_43_0001_9_0001_10_0030
-4288.88	0.987	-66.612	2.486	0.81	q1_ao_11_e3_4_43_0001_9_0002_11_0024
-4282.03	0.888	-69.558	2.466	0.81	q1_ao_11_e3_4_43_0001_9_0002_11_0036
-4290.7	0.703	-72.282	2.422	0.81	q1_ao_11_e3_4_43_0001_9_0004_11_0004
-4293.99	0.78	-68.208	2.441	0.81	q1_ao_11_e3_4_43_0001_9_0004_11_0013
-4287.38	0.761	-70.03	2.335	0.81	q1_ao_11_e3_4_43_0001_9_0004_11_0025
-4293.89	0.788	-69.593	2.386	0.81	q1_ao_11_e3_4_43_0001_9_0004_11_0029
-4290.26	0.77	-70.317	2.364	0.81	q1_ao_11_e3_4_43_0001_9_0006_11_0012
-4289.07	0.774	-69.782	2.386	0.81	q1_ao_11_e3_4_43_0001_9_0006_11_0037
-4287.85	0.869	-69.705	2.42	0.81	q1_ao_11_e3_4_43_0001_9_0006_11_0038
-4293.44	0.816	-69.839	2.447	0.81	q1_ao_11_e3_4_43_0001_9_0033_11_0011
-4295.17	0.826	-72.017	2.424	0.81	q1_ao_11_e3_4_43_0001_9_0033_11_0013
-4290.52	0.821	-68.541	2.404	0.81	q1_ao_11_e3_4_43_0001_9_0033_11_0026
-4294.72	0.816	-70.142	2.455	0.81	q1_ao_11_e3_4_43_0001_9_0033_11_0028
-4292.81	0.756	-70.034	2.416	0.81	q1_ao_11_e3_4_43_0001_9_0033_11_0035
-4289.4	0.787	-67.204	2.448	0.81	q1_ao_11_e3_4_43_0001_9_0033_11_0036
-4285.76	0.885	-69.298	2.42	0.81	q1_ao_11_e3_4_43_0001_9_0036_12_0025
-4286.34	0.863	-70.265	2.408	0.81	q1_ao_11_e3_4_43_0001_9_0038_12_0009
-4288.53	0.773	-70.347	2.403	0.81	q1_ao_11_e3_4_43_0001_9_0038_12_0038
-4288.7	0.838	-66.016	2.447	0.81	q1_ao_11_e3_7_87_0001_12_0009_14_0036
-4293.59	1.232	-67.226	2.199	0.81	q1_ao_11_e3_7_87_0001_12_0025_15_0037
-4286.85	0.929	-64.944	2.319	0.81	q1_ao_11_e3_8_29_0001_13_0002_15_0040
-4259.55	0.369	-72.304	2.596	0.81	q1_ao_12_e3_1_34_0001_15_0023_21_0014
-4261.91	0.452	-74.463	2.59	0.81	q1_ao_12_e3_2_70_0002_16_0022_21_0006
-4260.41	0.407	-74.642	2.616	0.81	q1_ao_12_e3_2_70_0002_16_0022_21_0008
-4264.24	0.433	-74.527	2.598	0.81	q1_ao_12_e3_2_70_0002_16_0022_21_0019
-4262.74	0.401	-74.792	2.603	0.81	q1_ao_12_e3_2_70_0002_16_0022_21_0039
-4251.66	0.884	-70.801	2.488	0.81	q1_ao_12_e3_8_28_0002_17_0011_21_0005
-4237.12	0.971	-72.55	2.522	0.81	q1_ao_12_e3_8_28_0002_17_0011_21_0034
-4260.2	0.648	-72.861	2.439	0.81	q1_ao_12_e3_8_28_0002_17_0019_22_0012
-4259.87	0.72	-72.865	2.485	0.81	q1_ao_12_e3_8_28_0002_17_0019_22_0036
-4248.35	1.063	-71.178	2.378	0.81	q1_ao_13_e3_2_14_0002_18_0038_23_0015
-4246.7	1.092	-69.251	2.35	0.81	q1_ao_13_e3_2_14_0002_18_0038_23_0021
-4247.16	1.12	-69.98	2.339	0.81	q1_ao_13_e3_2_14_0002_18_0038_23_0040
-4245.97	1.17	-69.519	2.401	0.81	q1_ao_13_e3_8_37_0002_20_0025_24_0015
-4244.84	1.124	-70.494	2.402	0.81	q1_ao_13_e3_8_37_0002_20_0025_24_0017
-4245.4	0.872	-68.537	2.415	0.81	q1_ao_13_e3_9_21_0002_21_0005_24_0020
-4242.83	1.001	-66.163	2.456	0.81	q1_ao_13_e3_9_21_0002_21_0028_25_0022
-4239.37	1.012	-68.791	2.407	0.81	q1_ao_13_e3_9_21_0002_21_0028_25_0029
-4243.14	1.065	-69.119	2.455	0.81	q1_ao_13_e3_9_21_0002_21_0040_25_0015
-4242.47	1.013	-68.491	2.412	0.81	q1_ao_13_e3_9_21_0002_21_0040_25_0025
-4245.34	0.939	-69.554	2.458	0.81	q1_ao_13_e3_9_21_0002_21_0040_25_0035
-4282.67	0.502	-72.388	2.415	0.81	q1_ao_14_e3_4_83_0002_25_0003_26_0004
-4283.02	0.686	-73.319	2.423	0.81	q1_ao_14_e3_4_83_0002_25_0003_26_0027
-4272.78	0.544	-72.579	2.375	0.81	q1_ao_14_e3_4_83_0002_25_0027_26_0001
-4276.41	2.125	-68.072	2.336	0.81	q1_ao_14_e3_6_94_0001_26_0022_27_0005
-4276.58	1.203	-68.788	2.375	0.81	q1_ao_14_e3_7_10_0001_26_0028_28_0039
-4237.08	1.153	-70.673	2.356	0.81	q1_ao_10_e3_4_92_0001_3_0011_2_0032
-4281.39	0.738	-72.041	2.301	0.81	q1_ao_14_e3_8_48_0001_28_0028_30_0014
-4272.73	0.763	-65.076	2.398	0.81	q1_ao_14_e3_9_50_0002_29_0016_31_0012
-4280.65	0.846	-73.375	2.475	0.81	q1_ao_14_e3_9_91_0002_29_0020_32_0018
-4282.61	0.78	-71.782	2.484	0.81	q1_ao_14_e3_9_91_0002_29_0020_32_0030
-4277.33	0.711	-67.702	2.385	0.81	q1_ao_15_e3_6_97_0002_33_0034_33_0013
-4257.27	0.973	-72.29	2.309	0.81	q1_ao_18_e3_6_33_0002_41_0005_37_0024
-4259.35	1.278	-70.029	2.463	0.81	q1_ao_18_e3_6_33_0002_41_0007_37_0018
-4256.89	0.803	-70.536	2.447	0.81	q1_ao_18_e3_6_33_0002_41_0024_37_0031
-4255.94	0.943	-69.904	2.462	0.81	q1_ao_18_e3_6_33_0002_41_0028_37_0008
-4256.46	1.005	-69.375	2.464	0.81	q1_ao_18_e3_6_33_0002_41_0028_37_0014
-4255.65	0.909	-69.453	2.459	0.81	q1_ao_18_e3_6_33_0002_41_0038_37_0034
-4256.02	1.007	-69.228	2.471	0.81	q1_ao_18_e3_6_33_0002_41_0040_37_0019
-4250.23	0.719	-66.309	2.341	0.81	q1_ao_18_e3_7_29_0002_42_0023_38_0003
-4249.22	0.815	-67.719	2.366	0.81	q1_ao_18_e3_7_29_0002_42_0023_38_0008
-4247.23	0.708	-68.428	2.362	0.81	q1_ao_18_e3_7_29_0002_42_0023_38_0014
-4252.01	0.661	-68.726	2.354	0.81	q1_ao_18_e3_7_29_0002_42_0023_38_0021
-4246.73	0.872	-68.979	2.308	0.81	q1_ao_18_e3_7_29_0002_42_0023_38_0034
-4250.19	0.753	-68.112	2.381	0.81	q1_ao_18_e3_7_29_0002_42_0023_38_0036
-4249.7	0.846	-66.673	2.344	0.81	q1_ao_18_e3_7_29_0002_42_0028_38_0004
-4250.4	0.833	-69.009	2.321	0.81	q1_ao_18_e3_7_29_0002_42_0028_38_0022
-4251.07	0.772	-68.932	2.358	0.81	q1_ao_18_e3_9_94_0002_43_0005_41_0004
-4262.62	0.922	-66.526	2.393	0.81	q1_ao_18_e3_9_94_0002_43_0008_41_0025
-4272.01	0.769	-76.946	2.478	0.81	q1_ao_19_e3_7_20_0002_45_0002_43_0011
-4274.92	0.722	-77.164	2.516	0.81	q1_ao_19_e3_7_20_0002_45_0002_43_0034
-4241.03	1.004	-77.014	2.44	0.81	q1_ao_1_e3_4_22_0002_46_0027_44_0001
-4242.91	0.948	-77.125	2.425	0.81	q1_ao_1_e3_4_22_0002_46_0027_44_0012
-4241.69	1.018	-77.415	2.485	0.81	q1_ao_1_e3_4_22_0002_46_0027_44_0023
-4241.17	0.964	-77.82	2.44	0.81	q1_ao_1_e3_4_22_0002_46_0027_44_0025
-4286.53	2.386	-72.117	2.229	0.81	q1_ao_20_e3_1_89_0001_50_0010_46_0008
-4285.94	0.897	-73.337	2.292	0.81	q1_ao_20_e3_3_51_0001_52_0009_47_0007
-4286.59	1.049	-73.461	2.28	0.81	q1_ao_20_e3_3_51_0001_52_0009_47_0016
-4286.79	0.972	-74.131	2.291	0.81	q1_ao_20_e3_3_51_0001_52_0009_47_0034
-4236.74	1.513	-72.901	2.442	0.81	q1_ao_10_e3_8_95_0002_4_0005_4_0002
-4248.81	1.322	-71.78	2.372	0.81	q1_ao_10_e3_8_95_0002_4_0022_4_0025
-4247.2	1.074	-70.456	2.409	0.81	q1_ao_10_e3_8_95_0002_4_0022_4_0030
-4286.13	0.799	-73.514	2.32	0.81	q1_ao_20_e3_6_55_0001_55_0011_50_0009
-4286.47	0.911	-71.152	2.34	0.81	q1_ao_20_e3_6_55_0001_55_0011_50_0018
-4287.39	0.832	-70.994	2.385	0.81	q1_ao_20_e3_8_10_0001_58_0014_55_0035
-4290.25	0.779	-72.708	2.475	0.81	q1_ao_2_e3_4_36_0002_61_0033_57_0017
-4293.11	1.284	-75.467	2.554	0.81	q1_ao_2_e3_6_37_0002_62_0030_57_0001
-4292.16	1.078	-75.438	2.573	0.81	q1_ao_2_e3_6_37_0002_62_0030_57_0020
-4293.8	1.048	-70.058	2.316	0.81	q1_ao_2_e3_6_59_0001_62_0012_57_0025
-4297.1	0.716	-70.43	2.373	0.81	q1_ao_3_e3_1_21_0001_64_0020_59_0007
-4296.27	0.969	-74.275	2.419	0.81	q1_ao_3_e3_1_21_0001_64_0020_59_0014
-4294.99	0.749	-72.225	2.421	0.81	q1_ao_3_e3_1_21_0001_64_0020_59_0038
-4294.9	0.802	-70.453	2.336	0.81	q1_ao_3_e3_2_15_0001_64_0001_59_0001
-4292.06	0.752	-69.162	2.355	0.81	q1_ao_3_e3_2_15_0001_64_0001_59_0006
-4306.4	0.612	-74.439	2.312	0.81	q1_ao_3_e3_2_15_0001_64_0001_59_0011
-4298.91	0.686	-69.316	2.383	0.81	q1_ao_3_e3_2_15_0001_64_0001_59_0025
-4298.37	0.661	-71.343	2.353	0.81	q1_ao_3_e3_2_15_0001_64_0006_59_0011
-4303.47	0.618	-67.955	2.34	0.81	q1_ao_3_e3_2_15_0001_64_0006_59_0034
-4297.98	0.559	-74.856	2.351	0.81	q1_ao_3_e3_2_15_0001_64_0013_60_0001
-4293.51	0.604	-67.792	2.43	0.81	q1_ao_3_e3_2_15_0001_64_0034_60_0036
-4299.44	0.737	-72.222	2.35	0.81	q1_ao_3_e3_2_15_0001_64_0038_60_0011
-4294.52	0.783	-70.64	2.352	0.81	q1_ao_3_e3_2_15_0001_64_0038_60_0025
-4302.98	0.609	-68.098	2.292	0.81	q1_ao_3_e3_2_15_0001_64_0038_60_0029
-4294.35	0.686	-67.796	2.504	0.81	q1_ao_3_e3_2_8_0001_65_0028_60_0026
-4289.56	1.067	-69.945	2.324	0.81	q1_ao_3_e3_4_5_0001_65_0031_61_0028
-4298.36	1.057	-74.515	2.349	0.81	q1_ao_3_e3_6_5_0001_67_0022_62_0006
-4294.08	1.054	-72.557	2.282	0.81	q1_ao_3_e3_6_5_0001_67_0022_62_0017
-4291.43	0.49	-69.563	2.48	0.81	q1_ao_3_e3_6_5_0001_67_0040_62_0003
-4303.37	0.57	-71.875	2.497	0.81	q1_ao_3_e3_6_5_0001_67_0040_62_0004
-4290.84	0.565	-73.255	2.492	0.81	q1_ao_3_e3_6_5_0001_67_0040_62_0036
-4306.46	0.983	-75.513	2.394	0.81	q1_ao_3_e3_7_26_0001_68_0006_62_0031
-4298.29	0.935	-70.961	2.357	0.81	q1_ao_3_e3_7_37_0002_68_0028_62_0040
-4299.54	0.838	-70.356	2.296	0.81	q1_ao_3_e3_7_5_0001_68_0017_62_0011
-4290.51	0.873	-69.046	2.415	0.81	q1_ao_3_e3_8_21_0001_69_0003_62_0016
-4294.38	0.942	-71.288	2.381	0.81	q1_ao_3_e3_8_21_0001_69_0003_62_0037
-4295.3	0.738	-69.248	2.367	0.81	q1_ao_3_e3_8_21_0001_69_0014_62_0040
-4302.65	0.817	-74.998	2.453	0.81	q1_ao_3_e3_8_21_0001_69_0023_63_0010
-4302.17	0.702	-76.396	2.43	0.81	q1_ao_3_e3_8_21_0001_69_0023_63_0029
-4299.05	0.506	-67.191	2.408	0.81	q1_ao_3_e3_8_21_0001_69_0027_63_0005
-4289.01	0.763	-64.469	2.377	0.81	q1_ao_3_e3_8_21_0001_69_0027_63_0023
-4293.23	0.763	-69.055	2.411	0.81	q1_ao_3_e3_8_21_0001_69_0039_63_0004
-4289.38	1.073	-67.042	2.395	0.81	q1_ao_3_e3_8_21_0001_69_0039_63_0031
-4294.84	0.949	-69.63	2.326	0.81	q1_ao_3_e3_8_21_0001_69_0040_63_0019
-4292.81	0.689	-71.991	2.493	0.81	q1_ao_3_e3_8_21_0001_69_0040_63_0040
-4296.58	0.872	-64.738	2.356	0.81	q1_ao_3_e3_8_61_0002_69_0018_64_0027
-4290.09	0.805	-73.564	2.442	0.81	q1_ao_3_e3_8_65_0001_69_0002_64_0001
-4303.94	0.831	-77.355	2.49	0.81	q1_ao_3_e3_8_65_0001_69_0002_64_0017
-4303.46	0.886	-76.459	2.484	0.81	q1_ao_3_e3_8_65_0001_69_0006_64_0015
-4296.69	0.76	-71.76	2.491	0.81	q1_ao_3_e3_8_65_0001_69_0006_64_0025
-4301.09	1.009	-74.659	2.5	0.81	q1_ao_3_e3_8_65_0001_69_0006_64_0027
-4296.98	0.95	-75.817	2.39	0.81	q1_ao_3_e3_8_65_0001_69_0006_64_0029
-4295.04	0.78	-69.052	2.46	0.81	q1_ao_3_e3_8_65_0001_69_0006_64_0037
-4301.34	0.957	-75.471	2.529	0.81	q1_ao_3_e3_8_65_0001_69_0006_64_0039
-4295.51	0.709	-69.599	2.527	0.81	q1_ao_3_e3_8_65_0001_69_0008_64_0035
-4299.63	0.961	-69.594	2.3	0.81	q1_ao_3_e3_8_86_0001_69_0025_65_0006
-4302.67	1.013	-68.598	2.296	0.81	q1_ao_3_e3_8_86_0001_69_0025_65_0010
-4299.96	0.9	-68.488	2.293	0.81	q1_ao_3_e3_8_86_0001_69_0025_65_0014
-4299.95	0.839	-66.532	2.321	0.81	q1_ao_3_e3_8_86_0001_69_0025_65_0027
-4287.04	1.064	-70.723	2.372	0.81	q1_ao_3_e3_8_93_0001_69_0026_65_0038
-4294.46	0.866	-71.03	2.309	0.81	q1_ao_3_e3_9_22_0001_69_0006_66_0024
-4290.57	0.865	-71.336	2.362	0.81	q1_ao_3_e3_9_22_0001_69_0030_66_0004
-4294.14	0.825	-71.349	2.373	0.81	q1_ao_3_e3_9_22_0001_69_0030_66_0008
-4295.69	0.716	-72.612	2.393	0.81	q1_ao_3_e3_9_22_0001_69_0030_66_0030
-4300.41	0.527	-70.097	2.293	0.81	q1_ao_3_e3_9_42_0001_70_0027_67_0013
-4292.92	1.058	-65.313	2.405	0.81	q1_ao_3_e3_9_98_0002_70_0003_67_0001
-4292.27	1.138	-65.679	2.417	0.81	q1_ao_3_e3_9_98_0002_70_0003_67_0025
-4292.92	1.136	-63.384	2.44	0.81	q1_ao_3_e3_9_98_0002_70_0006_67_0016
-4287.15	0.969	-64.943	2.438	0.81	q1_ao_3_e3_9_98_0002_70_0018_68_0009
-4288.89	0.983	-63.924	2.443	0.81	q1_ao_3_e3_9_98_0002_70_0018_68_0011
-4285.81	1.12	-61.881	2.411	0.81	q1_ao_3_e3_9_98_0002_70_0018_68_0013
-4291.9	1.09	-62.695	2.442	0.81	q1_ao_3_e3_9_98_0002_70_0018_68_0025
-4289.97	0.873	-65.152	2.436	0.81	q1_ao_3_e3_9_98_0002_70_0018_68_0034
-4291.49	1.21	-63.18	2.43	0.81	q1_ao_3_e3_9_98_0002_70_0026_68_0001
-4290.82	0.996	-64.9	2.438	0.81	q1_ao_3_e3_9_98_0002_70_0026_68_0015
-4293.99	1.089	-65.484	2.434	0.81	q1_ao_3_e3_9_98_0002_70_0026_68_0023
-4293.14	1.054	-63.651	2.445	0.81	q1_ao_3_e3_9_98_0002_70_0026_68_0030
-4292.41	1.081	-65.662	2.405	0.81	q1_ao_3_e3_9_98_0002_70_0026_68_0032
-4291.67	1.123	-63.258	2.438	0.81	q1_ao_3_e3_9_98_0002_70_0026_68_0035
-4293.65	1.08	-67.1	2.41	0.81	q1_ao_3_e3_9_98_0002_70_0026_68_0037
-4295.38	0.972	-69.4	2.305	0.81	q1_ao_3_e3_9_98_0002_70_0035_68_0004
-4290.24	1.019	-63.163	2.416	0.81	q1_ao_3_e3_9_98_0002_70_0035_68_0010
-4233.6	1.042	-68.757	2.386	0.81	q1_ao_4_e3_5_59_0002_73_0018_69_0018
-4239.04	0.858	-70.898	2.371	0.81	q1_ao_10_e3_9_9_0002_5_0013_6_0019
-4282.1	0.785	-72.848	2.422	0.81	q1_ao_6_e3_2_87_0002_83_0010_78_0039
-4283.77	1.098	-72.551	2.334	0.81	q1_ao_6_e3_4_79_0001_84_0010_79_0004
-4286.83	1.139	-74.104	2.344	0.81	q1_ao_6_e3_4_79_0001_84_0010_79_0006
-4268.2	1.198	-69.482	2.288	0.81	q1_ao_6_e3_4_79_0001_84_0010_79_0007
-4272.81	0.847	-73.444	2.454	0.81	q1_ao_6_e3_4_79_0001_84_0010_79_0009
-4273.85	1.286	-70.972	2.299	0.81	q1_ao_6_e3_4_79_0001_84_0010_79_0012
-4269.94	1.194	-70.1	2.268	0.81	q1_ao_6_e3_4_79_0001_84_0010_79_0031
-4281.79	0.846	-71.862	2.409	0.81	q1_ao_6_e3_7_52_0001_86_0023_82_0023
-4267.1	1.994	-71.18	2.372	0.81	q1_ao_6_e3_9_9_0002_88_0001_84_0027
-4268.94	0.821	-72.966	2.38	0.81	q1_ao_6_e3_9_9_0002_88_0001_84_0038
-4224.67	1.102	-64.29	2.476	0.81	q1_ao_7_e3_5_97_0001_90_0032_85_0008
-4219.46	1.196	-63.409	2.458	0.81	q1_ao_7_e3_5_97_0001_90_0032_85_0018
-4282.66	0.868	-69.493	2.294	0.81	q1_ao_11_e3_2_41_0002_7_0001_8_0002
-4287.64	0.811	-72.756	2.253	0.81	q1_ao_11_e3_2_41_0002_7_0001_8_0006
-4285.44	0.84	-70.831	2.302	0.81	q1_ao_11_e3_2_41_0002_7_0001_8_0010
-4287.56	0.785	-71.185	2.286	0.81	q1_ao_11_e3_2_41_0002_7_0001_8_0022
-4286.72	0.865	-70.901	2.268	0.81	q1_ao_11_e3_2_41_0002_7_0001_8_0033
-4289.5	0.813	-72.796	2.305	0.81	q1_ao_11_e3_2_41_0002_7_0001_8_0036
-4287.3	0.763	-72.079	2.317	0.81	q1_ao_11_e3_2_41_0002_7_0001_8_0038
-4289.8	0.971	-68.739	2.353	0.81	q1_ao_11_e3_2_41_0002_7_0012_8_0005
-4284.79	0.98	-67.417	2.323	0.81	q1_ao_11_e3_2_41_0002_7_0012_8_0023
-4290.85	0.786	-73.07	2.234	0.81	q1_ao_11_e3_2_41_0002_7_0017_8_0011
-4238.94	0.845	-70.983	2.445	0.81	q1_ao_7_e3_9_88_0001_91_0022_91_0003
-4239.09	0.865	-70.197	2.389	0.81	q1_ao_7_e3_9_88_0001_91_0022_91_0022
-4237.01	0.882	-72.102	2.401	0.81	q1_ao_7_e3_9_88_0001_91_0022_91_0035
-4240.23	1.079	-65.121	2.382	0.81	q1_ao_8_e3_1_3_0002_92_0002_91_0031
-4241.05	1.042	-67.534	2.443	0.81	q1_ao_8_e3_1_3_0002_92_0037_92_0002
-4279.39	0.77	-74.595	2.341	0.81	q1_ao_9_e3_5_38_0002_98_0011_95_0020
-4284.15	0.725	-69.007	2.306	0.81	q1_ao_9_e3_6_20_0002_98_0016_95_0014
-4284.14	0.726	-69.234	2.342	0.81	q1_ao_9_e3_6_20_0002_98_0016_95_0016
-4283.49	0.651	-71.607	2.331	0.81	q1_ao_9_e3_6_20_0002_98_0016_95_0022
-4283.7	0.8	-73.074	2.396	0.81	q1_ao_9_e3_6_37_0001_98_0040_96_0007
-4279.54	0.766	-69.596	2.52	0.81	q1_ao_9_e3_6_37_0001_98_0040_96_0037
-4281.45	0.653	-70.716	2.316	0.81	q1_ao_9_e3_7_52_0002_99_0027_97_0032
-4288.11	0.685	-70.409	2.352	0.81	q1_ao_9_e3_8_77_0001_100_0012_98_0015
-4295.26	0.846	-69.924	2.343	0.81	q1_ao_11_e3_2_41_0002_7_0039_9_0030
-4288.28	0.861	-72.216	2.328	0.81	q1_ao_9_e3_8_62_0002_100_0030_98_0021_100_0009
-4286.47	0.597	-72.227	2.34	0.81	q1_ao_9_e3_8_77_0001_100_0012_98_0013_100_0003
-4280.37	0.662	-68.88	2.354	0.81	q1_ao_9_e3_8_77_0001_100_0012_98_0013_100_0039
-4289.3	0.947	-71.957	2.347	0.81	q1_ao_11_e3_9_94_0002_14_0008_20_0005_15_0006
-4289.78	0.959	-70.571	2.338	0.81	q1_ao_11_e3_9_94_0002_14_0008_20_0005_15_0009
-4264.01	0.393	-74.199	2.584	0.81	q1_ao_12_e3_1_34_0001_15_0023_21_0014_16_0018
-4258.3	0.502	-72.638	2.627	0.81	q1_ao_12_e3_2_70_0002_16_0022_21_0001_17_0024
-4263.23	0.507	-75.725	2.602	0.81	q1_ao_12_e3_2_70_0002_16_0022_21_0001_17_0028
-4261.23	0.402	-74.1	2.595	0.81	q1_ao_12_e3_2_70_0002_16_0022_21_0006_17_0003
-4258.88	0.365	-74.892	2.579	0.81	q1_ao_12_e3_2_70_0002_16_0022_21_0006_17_0017
-4259.61	0.462	-75.016	2.605	0.81	q1_ao_12_e3_2_70_0002_16_0022_21_0006_17_0028
-4258.46	0.319	-75.692	2.626	0.81	q1_ao_12_e3_2_70_0002_16_0022_21_0008_17_0002
-4264.83	0.414	-75.214	2.597	0.81	q1_ao_12_e3_2_70_0002_16_0022_21_0010_17_0015
-4263.55	0.426	-74.532	2.617	0.81	q1_ao_12_e3_2_70_0002_16_0022_21_0010_17_0026
-4262.74	0.372	-74	2.622	0.81	q1_ao_12_e3_2_70_0002_16_0022_21_0010_17_0029
-4263.47	0.46	-74.725	2.6	0.81	q1_ao_12_e3_2_70_0002_16_0022_21_0019_17_0015
-4263.91	0.419	-74.694	2.599	0.81	q1_ao_12_e3_2_70_0002_16_0022_21_0019_17_0024
-4258.61	0.359	-73.711	2.582	0.81	q1_ao_12_e3_2_70_0002_16_0022_21_0019_17_0033
-4264.14	0.464	-74.595	2.61	0.81	q1_ao_12_e3_2_70_0002_16_0022_21_0035_17_0012
-4260.16	0.522	-73.393	2.607	0.81	q1_ao_12_e3_2_70_0002_16_0022_21_0035_17_0033
-4262.14	0.524	-72.819	2.601	0.81	q1_ao_12_e3_2_70_0002_16_0022_21_0036_17_0013
-4260.35	0.545	-73.564	2.618	0.81	q1_ao_12_e3_2_70_0002_16_0022_21_0036_17_0034
-4261.53	0.475	-74.905	2.582	0.81	q1_ao_12_e3_2_70_0002_16_0022_21_0039_17_0001
-4260.88	0.429	-73.898	2.625	0.81	q1_ao_12_e3_2_70_0002_16_0022_21_0039_17_0005
-4264.31	0.423	-73.793	2.614	0.81	q1_ao_12_e3_2_70_0002_16_0022_21_0039_17_0028
-4265.39	0.506	-75.107	2.56	0.81	q1_ao_12_e3_2_70_0002_16_0022_21_0040_18_0001
-4266.18	0.451	-75.279	2.564	0.81	q1_ao_12_e3_2_70_0002_16_0022_21_0040_18_0002
-4266.26	0.448	-76.746	2.57	0.81	q1_ao_12_e3_2_70_0002_16_0022_21_0040_18_0004
-4258.9	0.495	-73.77	2.564	0.81	q1_ao_12_e3_2_70_0002_16_0022_21_0040_18_0007
-4264.69	0.466	-76.312	2.566	0.81	q1_ao_12_e3_2_70_0002_16_0022_21_0040_18_0018
-4265.09	0.518	-75.23	2.56	0.81	q1_ao_12_e3_2_70_0002_16_0022_21_0040_18_0024
-4265.22	0.519	-76.001	2.559	0.81	q1_ao_12_e3_2_70_0002_16_0022_21_0040_18_0025
-4265.67	0.506	-76.083	2.56	0.81	q1_ao_12_e3_2_70_0002_16_0022_21_0040_18_0026
-4265.66	0.465	-75.395	2.561	0.81	q1_ao_12_e3_2_70_0002_16_0022_21_0040_18_0038
-4239.16	0.857	-72.112	2.486	0.81	q1_ao_12_e3_8_28_0002_17_0011_21_0005_18_0025
-4239.15	0.827	-73.391	2.439	0.81	q1_ao_12_e3_8_28_0002_17_0011_21_0005_18_0033
-4242.01	0.943	-71.194	2.439	0.81	q1_ao_12_e3_8_28_0002_17_0011_21_0017_18_0007
-4239.9	0.929	-68.655	2.491	0.81	q1_ao_12_e3_8_28_0002_17_0011_21_0017_18_0011
-4241.24	0.984	-70.43	2.459	0.81	q1_ao_12_e3_8_28_0002_17_0011_21_0017_18_0019
-4239.4	0.91	-68.179	2.502	0.81	q1_ao_12_e3_8_28_0002_17_0011_21_0017_18_0022
-4244.34	1	-71.902	2.472	0.81	q1_ao_12_e3_8_28_0002_17_0011_21_0017_18_0033
-4240.29	1.029	-69.999	2.44	0.81	q1_ao_12_e3_8_28_0002_17_0011_21_0017_18_0035
-4234.85	0.837	-70.163	2.517	0.81	q1_ao_12_e3_8_28_0002_17_0011_21_0026_18_0015
-4237.33	0.758	-75.131	2.511	0.81	q1_ao_12_e3_8_28_0002_17_0011_21_0026_18_0019
-4238.48	0.799	-72.275	2.503	0.81	q1_ao_12_e3_8_28_0002_17_0011_21_0034_18_0017
-4245.08	0.792	-73.896	2.511	0.81	q1_ao_12_e3_8_28_0002_17_0011_21_0034_18_0022
-4242.69	0.868	-72.127	2.48	0.81	q1_ao_12_e3_8_28_0002_17_0011_21_0034_18_0035
-4240.35	0.988	-69.088	2.504	0.81	q1_ao_12_e3_8_28_0002_17_0011_21_0039_18_0010
-4240.22	0.923	-68.959	2.503	0.81	q1_ao_12_e3_8_28_0002_17_0011_21_0039_18_0015
-4239.86	1.044	-70.417	2.515	0.81	q1_ao_12_e3_8_28_0002_17_0011_21_0039_18_0021
-4260.14	0.683	-72.48	2.528	0.81	q1_ao_12_e3_8_28_0002_17_0019_22_0004_18_0004
-4260.25	0.802	-72.987	2.487	0.81	q1_ao_12_e3_8_28_0002_17_0019_22_0004_18_0014
-4261.07	0.78	-73.549	2.484	0.81	q1_ao_12_e3_8_28_0002_17_0019_22_0004_18_0019
-4259.95	0.745	-72.085	2.523	0.81	q1_ao_12_e3_8_28_0002_17_0019_22_0004_18_0028
-4259.58	0.621	-72.342	2.473	0.81	q1_ao_12_e3_8_28_0002_17_0019_22_0004_18_0034
-4249.31	0.729	-74.843	2.488	0.81	q1_ao_12_e3_8_28_0002_17_0019_22_0004_18_0037
-4260.05	0.72	-73.887	2.424	0.81	q1_ao_12_e3_8_28_0002_17_0019_22_0012_18_0022
-4260.37	0.669	-72.69	2.51	0.81	q1_ao_12_e3_8_28_0002_17_0019_22_0012_18_0024
-4259.53	0.647	-75.495	2.525	0.81	q1_ao_12_e3_8_28_0002_17_0019_22_0012_18_0029
-4257.83	0.652	-71.002	2.522	0.81	q1_ao_12_e3_8_28_0002_17_0019_22_0020_18_0005
-4259.3	0.715	-73.051	2.476	0.81	q1_ao_12_e3_8_28_0002_17_0019_22_0020_18_0014
-4251.27	0.634	-71.543	2.482	0.81	q1_ao_12_e3_8_28_0002_17_0019_22_0020_18_0015
-4258.74	0.748	-71.748	2.47	0.81	q1_ao_12_e3_8_28_0002_17_0019_22_0020_18_0018
-4260.43	0.703	-71.38	2.52	0.81	q1_ao_12_e3_8_28_0002_17_0019_22_0020_18_0030
-4261.3	0.694	-72.514	2.518	0.81	q1_ao_12_e3_8_28_0002_17_0019_22_0020_18_0035
-4257.57	0.693	-72.596	2.476	0.81	q1_ao_12_e3_8_28_0002_17_0019_22_0020_18_0039
-4261.78	0.657	-74.625	2.481	0.81	q1_ao_12_e3_8_28_0002_17_0019_22_0026_18_0018
-4260.58	0.751	-72.036	2.519	0.81	q1_ao_12_e3_8_28_0002_17_0019_22_0036_19_0002
-4261.5	0.692	-72.862	2.538	0.81	q1_ao_12_e3_8_28_0002_17_0019_22_0036_19_0020
-4259.06	0.6	-74.623	2.484	0.81	q1_ao_12_e3_8_28_0002_17_0019_22_0036_19_0024
-4261.99	0.702	-73.329	2.459	0.81	q1_ao_12_e3_8_28_0002_17_0019_22_0036_19_0027
-4260.72	0.592	-74.338	2.489	0.81	q1_ao_12_e3_8_28_0002_17_0019_22_0036_19_0033
-4261.68	0.733	-73.564	2.49	0.81	q1_ao_12_e3_8_28_0002_17_0019_22_0036_19_0035
-4243.04	1.099	-70.291	2.359	0.81	q1_ao_13_e3_2_14_0002_18_0038_23_0005_20_0002
-4248.51	0.895	-69.39	2.414	0.81	q1_ao_13_e3_2_14_0002_18_0038_23_0015_20_0006
-4246.21	1.093	-69.909	2.442	0.81	q1_ao_13_e3_2_14_0002_18_0038_23_0031_20_0024
-4243.79	1.146	-68.537	2.409	0.81	q1_ao_13_e3_2_14_0002_18_0038_23_0031_20_0031
-4250.36	0.886	-72.075	2.451	0.81	q1_ao_13_e3_9_21_0002_21_0040_25_0030_21_0011
-4248.6	0.905	-70.73	2.469	0.81	q1_ao_13_e3_9_21_0002_21_0040_25_0030_21_0019
-4245.1	0.925	-69.806	2.427	0.81	q1_ao_13_e3_9_21_0002_21_0040_25_0030_21_0021
-4282.44	0.531	-74.03	2.309	0.81	q1_ao_14_e3_3_60_0002_24_0004_25_0017_21_0036
-4279.55	0.461	-73.27	2.306	0.81	q1_ao_14_e3_3_60_0002_24_0004_25_0017_21_0038
-4280.38	0.525	-70.487	2.298	0.81	q1_ao_14_e3_3_60_0002_24_0004_25_0019_21_0021
-4282.11	0.51	-77.464	2.386	0.81	q1_ao_14_e3_3_60_0002_24_0018_26_0006_22_0025
-4283.02	0.513	-74.23	2.425	0.81	q1_ao_14_e3_4_83_0002_25_0003_26_0004_24_0030
-4283.29	0.659	-75.584	2.427	0.81	q1_ao_14_e3_4_83_0002_25_0003_26_0027_24_0020
-4277.76	0.559	-72.861	2.429	0.81	q1_ao_14_e3_4_83_0002_25_0003_26_0035_24_0013
-4283.15	0.581	-74.209	2.429	0.81	q1_ao_14_e3_4_83_0002_25_0003_26_0035_24_0032
-4277.14	0.644	-73.532	2.415	0.81	q1_ao_14_e3_4_83_0002_25_0003_26_0035_24_0039
-4276.38	0.554	-74.075	2.411	0.81	q1_ao_14_e3_4_83_0002_25_0027_26_0012_25_0012
-4279.02	0.505	-75.089	2.414	0.81	q1_ao_14_e3_4_83_0002_25_0027_26_0012_25_0021
-4276.77	0.529	-73.844	2.408	0.81	q1_ao_14_e3_4_83_0002_25_0027_26_0012_25_0038
-4279.33	0.626	-74.591	2.33	0.81	q1_ao_14_e3_4_83_0002_25_0027_26_0040_25_0026
-4278.63	0.467	-72.96	2.433	0.81	q1_ao_14_e3_4_83_0002_25_0027_26_0040_25_0035
-4278.86	1.019	-72.724	2.34	0.81	q1_ao_14_e3_6_11_0002_25_0036_27_0024_26_0009
-4282.53	0.864	-74.115	2.35	0.81	q1_ao_14_e3_6_11_0002_25_0036_27_0024_26_0013
-4282.03	0.925	-73.672	2.353	0.81	q1_ao_14_e3_6_11_0002_25_0036_27_0024_26_0028
-4278.19	0.876	-71.901	2.364	0.81	q1_ao_14_e3_6_11_0002_25_0036_27_0039_26_0009
-4280.88	0.952	-72.156	2.341	0.81	q1_ao_14_e3_8_13_0002_27_0015_29_0008_28_0004
-4285.41	0.881	-73.735	2.34	0.81	q1_ao_14_e3_8_13_0002_27_0015_29_0014_28_0039
-4277.9	0.958	-72.116	2.474	0.81	q1_ao_14_e3_8_13_0002_27_0027_29_0008_28_0038
-4285.67	0.876	-74.491	2.355	0.81	q1_ao_14_e3_8_13_0002_27_0027_29_0027_28_0002
-4287.24	0.918	-73.624	2.341	0.81	q1_ao_14_e3_8_13_0002_27_0027_29_0027_28_0021
-4279.55	0.964	-71.36	2.332	0.81	q1_ao_14_e3_8_13_0002_27_0037_29_0004_29_0009
-4279.64	0.79	-73.519	2.307	0.81	q1_ao_14_e3_8_48_0001_28_0028_30_0002_29_0032
-4245.59	1.226	-72.966	2.396	0.81	q1_ao_10_e3_8_95_0002_4_0005_4_0002_2_0024
-4249.09	1.163	-73.285	2.381	0.81	q1_ao_10_e3_8_95_0002_4_0005_4_0002_2_0026
-4249.25	1.353	-72.152	2.367	0.81	q1_ao_10_e3_8_95_0002_4_0022_4_0025_2_0014
-4252.14	1.125	-73.817	2.356	0.81	q1_ao_10_e3_8_95_0002_4_0022_4_0037_2_0002
-4247.22	1.106	-71.918	2.384	0.81	q1_ao_10_e3_8_95_0002_4_0022_4_0037_2_0024
-4247.79	1.213	-71.514	2.371	0.81	q1_ao_10_e3_8_95_0002_4_0022_4_0037_2_0027
-4243.73	1.266	-71.702	2.369	0.81	q1_ao_10_e3_8_95_0002_4_0022_4_0037_2_0030
-4246.6	1.101	-71.748	2.335	0.81	q1_ao_10_e3_8_95_0002_4_0022_4_0037_2_0035
-4246.58	1.241	-72.767	2.364	0.81	q1_ao_10_e3_8_95_0002_4_0022_4_0037_2_0036
-4282.16	0.803	-71.803	2.294	0.81	q1_ao_14_e3_8_48_0001_28_0028_30_0014_30_0008
-4276.38	0.835	-71.86	2.326	0.81	q1_ao_14_e3_8_48_0001_28_0028_30_0021_30_0034
-4283.19	0.945	-76.101	2.352	0.81	q1_ao_14_e3_9_51_0002_29_0009_32_0010_32_0014
-4280.09	0.918	-71.579	2.55	0.81	q1_ao_14_e3_9_91_0002_29_0020_32_0005_33_0020
-4279.97	0.858	-71.924	2.548	0.81	q1_ao_14_e3_9_91_0002_29_0020_32_0011_33_0024
-4283.2	0.954	-73.973	2.424	0.81	q1_ao_14_e3_9_91_0002_29_0020_32_0016_33_0003
-4281.06	0.88	-73.63	2.447	0.81	q1_ao_14_e3_9_91_0002_29_0020_32_0018_33_0037
-4281.04	0.862	-71.815	2.567	0.81	q1_ao_14_e3_9_91_0002_29_0020_32_0025_33_0016
-4279.75	0.864	-72.681	2.55	0.81	q1_ao_14_e3_9_91_0002_29_0020_32_0025_33_0020
-4281.51	0.843	-71.664	2.565	0.81	q1_ao_14_e3_9_91_0002_29_0020_32_0025_33_0022
-4280.99	0.918	-73.734	2.572	0.81	q1_ao_14_e3_9_91_0002_29_0020_32_0025_33_0027
-4281.8	0.815	-72.645	2.465	0.81	q1_ao_14_e3_9_91_0002_29_0020_32_0030_33_0002
-4280.2	0.796	-72.93	2.444	0.81	q1_ao_14_e3_9_91_0002_29_0020_32_0030_33_0003
-4281.93	0.787	-72.705	2.424	0.81	q1_ao_14_e3_9_91_0002_29_0020_32_0030_33_0011
-4282.23	0.922	-73.136	2.35	0.81	q1_ao_14_e3_9_91_0002_29_0020_32_0030_33_0017
-4281.22	0.826	-71.121	2.479	0.81	q1_ao_14_e3_9_91_0002_29_0020_32_0031_34_0040
-4279.62	0.857	-74.549	2.582	0.81	q1_ao_14_e3_9_91_0002_29_0020_32_0035_34_0002
-4279.31	1.071	-70.75	2.331	0.81	q1_ao_14_e3_9_91_0002_29_0020_32_0037_34_0006
-4284.68	1.064	-73.192	2.322	0.81	q1_ao_14_e3_9_91_0002_29_0020_32_0037_34_0039
-4278.7	0.667	-73.261	2.296	0.81	q1_ao_15_e3_1_97_0002_30_0027_33_0002_37_0017
-4279.35	0.58	-72.836	2.314	0.81	q1_ao_15_e3_1_97_0002_30_0027_33_0002_37_0027
-4282.22	0.636	-73.93	2.3	0.81	q1_ao_15_e3_1_97_0002_30_0027_33_0019_37_0023
-4282.96	0.586	-74.148	2.307	0.81	q1_ao_15_e3_1_97_0002_30_0027_33_0034_37_0007
-4280.36	0.538	-73.239	2.309	0.81	q1_ao_15_e3_1_97_0002_30_0027_33_0034_37_0032
-4280.43	0.556	-72.744	2.316	0.81	q1_ao_15_e3_1_97_0002_30_0027_33_0034_37_0037
-4277.98	1.688	-73.333	2.212	0.81	q1_ao_15_e3_9_22_0002_34_0007_34_0029_38_0027
-4256.94	0.976	-71.111	2.416	0.81	q1_ao_18_e3_6_33_0002_41_0005_37_0010_39_0013
-4260.43	0.858	-74.878	2.328	0.81	q1_ao_18_e3_6_33_0002_41_0005_37_0024_39_0019
-4250.51	0.731	-68.546	2.334	0.81	q1_ao_18_e3_7_29_0002_42_0023_38_0030_39_0002
-4251.77	0.754	-70.442	2.349	0.81	q1_ao_18_e3_7_29_0002_42_0023_38_0030_39_0003
-4252.01	0.749	-70.239	2.351	0.81	q1_ao_18_e3_7_29_0002_42_0023_38_0030_39_0006
-4252.7	0.708	-71.642	2.339	0.81	q1_ao_18_e3_7_29_0002_42_0023_38_0030_39_0010
-4249.18	0.818	-70.013	2.338	0.81	q1_ao_18_e3_7_29_0002_42_0023_38_0030_39_0014
-4247.38	0.725	-69.272	2.378	0.81	q1_ao_18_e3_7_29_0002_42_0023_38_0030_39_0020
-4252.21	0.734	-70.563	2.337	0.81	q1_ao_18_e3_7_29_0002_42_0023_38_0030_39_0024
-4253.04	0.686	-71.276	2.341	0.81	q1_ao_18_e3_7_29_0002_42_0023_38_0030_39_0025
-4250.36	0.783	-71.195	2.363	0.81	q1_ao_18_e3_7_29_0002_42_0023_38_0030_39_0033
-4251.37	0.758	-70.193	2.337	0.81	q1_ao_18_e3_7_29_0002_42_0023_38_0030_39_0034
-4249.88	0.787	-70.049	2.295	0.81	q1_ao_18_e3_7_29_0002_42_0032_38_0035_39_0010
-4260.65	2.304	-66.604	2.239	0.81	q1_ao_18_e3_7_29_0002_42_0032_38_0035_39_0025
-4246.33	1.126	-67.661	2.324	0.81	q1_ao_10_e3_8_95_0002_4_0028_4_0007_3_0005
-4255.05	0.714	-73.129	2.469	0.81	q1_ao_19_e3_1_9_0001_43_0001_42_0036_41_0003
-4261.43	0.986	-75.588	2.45	0.81	q1_ao_19_e3_1_9_0001_43_0001_42_0037_41_0009
-4265.92	0.781	-74.554	2.423	0.81	q1_ao_19_e3_1_9_0001_43_0001_42_0037_41_0010
-4262.93	1.062	-75.222	2.453	0.81	q1_ao_19_e3_1_9_0001_43_0001_42_0037_41_0020
-4260.5	0.867	-74.641	2.435	0.81	q1_ao_19_e3_1_9_0001_43_0001_42_0037_41_0031
-4261.85	0.857	-73.318	2.466	0.81	q1_ao_19_e3_1_9_0001_43_0027_42_0017_42_0026
-4271.63	0.764	-75.442	2.479	0.81	q1_ao_19_e3_7_20_0002_45_0002_43_0008_42_0021
-4273.62	0.764	-76.206	2.518	0.81	q1_ao_19_e3_7_20_0002_45_0002_43_0008_42_0034
-4271.55	0.862	-75.102	2.515	0.81	q1_ao_19_e3_7_20_0002_45_0002_43_0011_42_0007
-4271.95	0.825	-75.559	2.514	0.81	q1_ao_19_e3_7_20_0002_45_0002_43_0011_42_0011
-4270.9	0.663	-76.548	2.528	0.81	q1_ao_19_e3_7_20_0002_45_0002_43_0013_42_0002
-4273.73	0.686	-76.493	2.515	0.81	q1_ao_19_e3_7_20_0002_45_0002_43_0013_42_0013
-4275.22	0.769	-76.038	2.513	0.81	q1_ao_19_e3_7_20_0002_45_0002_43_0034_42_0002
-4271.6	0.624	-75.299	2.492	0.81	q1_ao_19_e3_7_20_0002_45_0002_43_0034_42_0009
-4276.76	0.68	-77.788	2.512	0.81	q1_ao_19_e3_7_20_0002_45_0002_43_0034_42_0011
-4273.55	0.774	-76.178	2.519	0.81	q1_ao_19_e3_7_20_0002_45_0002_43_0034_42_0012
-4273.88	0.801	-75.189	2.519	0.81	q1_ao_19_e3_7_20_0002_45_0002_43_0034_42_0019
-4275.94	0.613	-76.155	2.516	0.81	q1_ao_19_e3_7_20_0002_45_0002_43_0034_42_0035
-4238.08	1.153	-75.044	2.43	0.81	q1_ao_1_e3_4_22_0002_46_0027_44_0001_43_0002
-4243.3	1.064	-78.471	2.482	0.81	q1_ao_1_e3_4_22_0002_46_0027_44_0001_43_0005
-4240.64	0.921	-76.377	2.442	0.81	q1_ao_1_e3_4_22_0002_46_0027_44_0001_43_0010
-4241.32	1.074	-77.049	2.438	0.81	q1_ao_1_e3_4_22_0002_46_0027_44_0001_43_0013
-4244.36	0.999	-77.88	2.436	0.81	q1_ao_1_e3_4_22_0002_46_0027_44_0001_43_0015
-4240.69	0.925	-76.778	2.433	0.81	q1_ao_1_e3_4_22_0002_46_0027_44_0001_43_0016
-4241.36	1.017	-77.899	2.436	0.81	q1_ao_1_e3_4_22_0002_46_0027_44_0001_43_0022
-4242.11	1.137	-78.013	2.437	0.81	q1_ao_1_e3_4_22_0002_46_0027_44_0001_43_0025
-4241.53	1.082	-76.864	2.443	0.81	q1_ao_1_e3_4_22_0002_46_0027_44_0001_43_0037
-4235.11	0.875	-74.442	2.426	0.81	q1_ao_1_e3_4_22_0002_46_0027_44_0012_43_0001
-4242.37	0.975	-77.861	2.428	0.81	q1_ao_1_e3_4_22_0002_46_0027_44_0012_43_0003
-4243.35	0.933	-77.343	2.426	0.81	q1_ao_1_e3_4_22_0002_46_0027_44_0012_43_0007
-4239.97	0.894	-77.528	2.435	0.81	q1_ao_1_e3_4_22_0002_46_0027_44_0012_43_0009
-4240.82	0.921	-79.044	2.437	0.81	q1_ao_1_e3_4_22_0002_46_0027_44_0012_43_0010
-4240.36	0.946	-78.251	2.438	0.81	q1_ao_1_e3_4_22_0002_46_0027_44_0012_43_0012
-4241.43	1.011	-77.665	2.43	0.81	q1_ao_1_e3_4_22_0002_46_0027_44_0012_43_0015
-4244.05	1.004	-78.21	2.467	0.81	q1_ao_1_e3_4_22_0002_46_0027_44_0012_43_0018
-4241.14	1.076	-76.249	2.426	0.81	q1_ao_1_e3_4_22_0002_46_0027_44_0012_43_0021
-4242.65	0.929	-76.987	2.482	0.81	q1_ao_1_e3_4_22_0002_46_0027_44_0023_43_0011
-4244.01	0.925	-77.466	2.479	0.81	q1_ao_1_e3_4_22_0002_46_0027_44_0023_43_0014
-4240.99	0.983	-75.466	2.479	0.81	q1_ao_1_e3_4_22_0002_46_0027_44_0023_43_0015
-4243.81	0.968	-77.664	2.479	0.81	q1_ao_1_e3_4_22_0002_46_0027_44_0023_43_0027
-4241.87	1.037	-77.315	2.486	0.81	q1_ao_1_e3_4_22_0002_46_0027_44_0023_43_0035
-4238.23	0.876	-74.814	2.457	0.81	q1_ao_1_e3_4_22_0002_46_0027_44_0025_43_0012
-4238.43	0.893	-78.526	2.442	0.81	q1_ao_1_e3_4_22_0002_46_0027_44_0025_43_0018
-4241.79	0.93	-79.453	2.446	0.81	q1_ao_1_e3_4_22_0002_46_0027_44_0025_43_0025
-4242.72	0.94	-77.569	2.439	0.81	q1_ao_1_e3_4_22_0002_46_0027_44_0025_43_0030
-4237.13	1.043	-77.094	2.444	0.81	q1_ao_1_e3_4_22_0002_46_0027_44_0025_43_0040
-4285.6	2.64	-68.613	2.242	0.81	q1_ao_20_e3_1_89_0001_50_0010_46_0008_44_0009
-4285.3	2.416	-70.933	2.273	0.81	q1_ao_20_e3_1_89_0001_50_0010_46_0008_44_0013
-4286.78	2.484	-70.717	2.254	0.81	q1_ao_20_e3_1_89_0001_50_0010_46_0008_44_0021
-4287.58	0.53	-73.47	2.316	0.81	q1_ao_20_e3_1_89_0001_50_0039_46_0011_45_0004
-4289.47	0.597	-75.061	2.311	0.81	q1_ao_20_e3_1_89_0001_50_0039_46_0011_45_0014
-4290.49	0.569	-74.064	2.292	0.81	q1_ao_20_e3_1_89_0001_50_0039_46_0017_45_0015
-4289.17	0.684	-73.519	2.296	0.81	q1_ao_20_e3_1_89_0001_50_0039_46_0017_45_0040
-4288.14	0.506	-72.978	2.315	0.81	q1_ao_20_e3_1_89_0001_50_0039_46_0035_45_0011
-4291.37	0.517	-74.38	2.297	0.81	q1_ao_20_e3_1_89_0001_50_0039_46_0035_45_0036
-4290.26	0.609	-74.12	2.295	0.81	q1_ao_20_e3_1_89_0001_50_0039_46_0040_45_0031
-4287.95	0.918	-74.917	2.288	0.81	q1_ao_20_e3_3_51_0001_52_0009_47_0001_46_0001
-4286.7	1.056	-73.698	2.279	0.81	q1_ao_20_e3_3_51_0001_52_0009_47_0001_46_0003
-4287.23	0.865	-73.946	2.291	0.81	q1_ao_20_e3_3_51_0001_52_0009_47_0001_46_0034
-4289.11	0.764	-74.49	2.285	0.81	q1_ao_20_e3_3_51_0001_52_0009_47_0001_46_0040
-4288.78	0.945	-76.473	2.275	0.81	q1_ao_20_e3_3_51_0001_52_0009_47_0004_46_0004
-4285.52	0.958	-73.032	2.285	0.81	q1_ao_20_e3_3_51_0001_52_0009_47_0004_46_0017
-4287.14	0.85	-74.762	2.285	0.81	q1_ao_20_e3_3_51_0001_52_0009_47_0004_46_0031
-4284.17	0.873	-73.848	2.299	0.81	q1_ao_20_e3_3_51_0001_52_0009_47_0007_46_0005
-4283.08	0.729	-74.019	2.294	0.81	q1_ao_20_e3_3_51_0001_52_0009_47_0007_46_0024
-4286.42	0.804	-74.554	2.295	0.81	q1_ao_20_e3_3_51_0001_52_0009_47_0007_46_0039
-4287.06	1.093	-75.291	2.3	0.81	q1_ao_20_e3_3_51_0001_52_0009_47_0009_47_0004
-4285.13	0.925	-73.451	2.288	0.81	q1_ao_20_e3_3_51_0001_52_0009_47_0009_47_0007
-4284.6	0.883	-73.021	2.29	0.81	q1_ao_20_e3_3_51_0001_52_0009_47_0009_47_0014
-4285.99	1.012	-73.546	2.286	0.81	q1_ao_20_e3_3_51_0001_52_0009_47_0009_47_0016
-4286.09	0.963	-73.562	2.286	0.81	q1_ao_20_e3_3_51_0001_52_0009_47_0009_47_0018
-4284.24	0.922	-74.769	2.313	0.81	q1_ao_20_e3_3_51_0001_52_0009_47_0009_47_0020
-4283.6	0.899	-73.416	2.307	0.81	q1_ao_20_e3_3_51_0001_52_0009_47_0009_47_0022
-4284.12	1.163	-72.989	2.283	0.81	q1_ao_20_e3_3_51_0001_52_0009_47_0009_47_0034
-4284.98	0.84	-72.558	2.29	0.81	q1_ao_20_e3_3_51_0001_52_0009_47_0009_47_0035
-4285.56	0.954	-74.857	2.29	0.81	q1_ao_20_e3_3_51_0001_52_0009_47_0015_47_0008
-4287.02	0.819	-74.822	2.294	0.81	q1_ao_20_e3_3_51_0001_52_0009_47_0015_47_0011
-4286.23	0.79	-75.223	2.299	0.81	q1_ao_20_e3_3_51_0001_52_0009_47_0015_47_0032
-4287.5	0.902	-76.007	2.289	0.81	q1_ao_20_e3_3_51_0001_52_0009_47_0016_47_0005
-4285.98	1.152	-75.29	2.291	0.81	q1_ao_20_e3_3_51_0001_52_0009_47_0016_47_0016
-4285.25	0.783	-71.986	2.272	0.81	q1_ao_20_e3_3_51_0001_52_0009_47_0016_47_0027
-4286.71	1.009	-74.482	2.281	0.81	q1_ao_20_e3_3_51_0001_52_0009_47_0016_47_0036
-4286.58	1.028	-75.095	2.276	0.81	q1_ao_20_e3_3_51_0001_52_0009_47_0016_47_0037
-4282.43	0.938	-73.43	2.277	0.81	q1_ao_20_e3_3_51_0001_52_0009_47_0026_47_0007
-4282.37	0.983	-72.288	2.274	0.81	q1_ao_20_e3_3_51_0001_52_0009_47_0026_47_0010
-4286.27	0.978	-74.927	2.259	0.81	q1_ao_20_e3_3_51_0001_52_0009_47_0026_47_0023
-4290.19	1.046	-76.402	2.289	0.81	q1_ao_20_e3_3_51_0001_52_0009_47_0026_47_0026
-4287.52	1.14	-76.294	2.286	0.81	q1_ao_20_e3_3_51_0001_52_0009_47_0026_47_0030
-4287	1.108	-73.699	2.275	0.81	q1_ao_20_e3_3_51_0001_52_0009_47_0026_47_0034
-4283.1	0.892	-74.267	2.288	0.81	q1_ao_20_e3_3_51_0001_52_0009_47_0029_47_0025
-4286.49	0.798	-72.976	2.297	0.81	q1_ao_20_e3_3_51_0001_52_0009_47_0029_47_0027
-4286.64	0.89	-73.378	2.287	0.81	q1_ao_20_e3_3_51_0001_52_0009_47_0029_47_0029
-4286.03	0.898	-73.66	2.283	0.81	q1_ao_20_e3_3_51_0001_52_0009_47_0029_47_0034
-4285.78	1.01	-74.333	2.286	0.81	q1_ao_20_e3_3_51_0001_52_0009_47_0029_47_0037
-4283.01	0.951	-72.009	2.287	0.81	q1_ao_20_e3_3_51_0001_52_0009_47_0029_47_0038
-4287.68	1.047	-75.513	2.284	0.81	q1_ao_20_e3_3_51_0001_52_0009_47_0031_47_0030
-4287.53	1.054	-75.454	2.284	0.81	q1_ao_20_e3_3_51_0001_52_0009_47_0031_47_0034
-4286.24	0.759	-73.547	2.282	0.81	q1_ao_20_e3_3_51_0001_52_0009_47_0031_47_0037
-4287.27	1.094	-74.412	2.291	0.81	q1_ao_20_e3_3_51_0001_52_0009_47_0034_47_0001
-4286.77	0.893	-74.905	2.299	0.81	q1_ao_20_e3_3_51_0001_52_0009_47_0034_47_0003
-4286.23	0.887	-74.522	2.288	0.81	q1_ao_20_e3_3_51_0001_52_0009_47_0034_47_0006
-4286.58	1.037	-74.244	2.289	0.81	q1_ao_20_e3_3_51_0001_52_0009_47_0034_47_0010
-4287.02	0.868	-74.345	2.296	0.81	q1_ao_20_e3_3_51_0001_52_0009_47_0034_47_0012
-4287.77	0.836	-75.146	2.294	0.81	q1_ao_20_e3_3_51_0001_52_0009_47_0034_47_0017
-4282	0.929	-73.12	2.291	0.81	q1_ao_20_e3_3_51_0001_52_0009_47_0034_47_0035
-4288.55	1.028	-75.628	2.296	0.81	q1_ao_20_e3_3_51_0001_52_0009_47_0034_47_0036
-4287.03	0.862	-75.026	2.298	0.81	q1_ao_20_e3_3_51_0001_52_0009_47_0034_47_0040
-4287.19	0.909	-74.01	2.284	0.81	q1_ao_20_e3_3_51_0001_52_0009_47_0039_47_0002
-4286.35	0.994	-75.87	2.282	0.81	q1_ao_20_e3_3_51_0001_52_0009_47_0039_47_0011
-4287.46	0.919	-75.716	2.295	0.81	q1_ao_20_e3_3_51_0001_52_0009_47_0039_47_0015
-4285.99	0.99	-75.137	2.288	0.81	q1_ao_20_e3_3_51_0001_52_0009_47_0039_47_0016
-4286.44	0.958	-74.752	2.285	0.81	q1_ao_20_e3_3_51_0001_52_0009_47_0039_47_0030
-4285.89	1.107	-73.543	2.278	0.81	q1_ao_20_e3_3_51_0001_52_0009_47_0039_47_0040
-4281.65	0.817	-72.02	2.331	0.81	q1_ao_20_e3_6_55_0001_55_0011_50_0009_48_0018
-4287.38	0.781	-74.373	2.322	0.81	q1_ao_20_e3_6_55_0001_55_0011_50_0009_48_0020
-4283.23	0.788	-72.622	2.356	0.81	q1_ao_20_e3_6_55_0001_55_0011_50_0009_48_0023
-4284.83	0.802	-75.057	2.323	0.81	q1_ao_20_e3_6_55_0001_55_0011_50_0009_48_0027
-4286.74	0.818	-72.736	2.329	0.81	q1_ao_20_e3_6_55_0001_55_0011_50_0009_48_0037
-4286.83	0.73	-74.39	2.326	0.81	q1_ao_20_e3_6_55_0001_55_0011_50_0012_48_0004
-4289.66	0.74	-72.45	2.354	0.81	q1_ao_20_e3_6_55_0001_55_0011_50_0012_48_0022
-4282.15	0.726	-71.968	2.339	0.81	q1_ao_20_e3_6_55_0001_55_0011_50_0012_48_0023
-4291.61	0.732	-72.721	2.343	0.81	q1_ao_20_e3_6_55_0001_55_0011_50_0012_48_0029
-4282.36	0.806	-72.969	2.337	0.81	q1_ao_20_e3_6_55_0001_55_0011_50_0012_48_0039
-4278.67	0.994	-70.667	2.32	0.81	q1_ao_20_e3_6_55_0001_55_0011_50_0013_48_0013
-4279.77	0.946	-71.419	2.338	0.81	q1_ao_20_e3_6_55_0001_55_0011_50_0013_48_0016
-4291.88	0.783	-72.762	2.354	0.81	q1_ao_20_e3_6_55_0001_55_0011_50_0014_48_0002
-4283.47	0.758	-71.961	2.326	0.81	q1_ao_20_e3_6_55_0001_55_0011_50_0014_48_0006
-4279.61	0.814	-73.062	2.307	0.81	q1_ao_20_e3_6_55_0001_55_0011_50_0014_48_0022
-4285.54	0.95	-72.274	2.326	0.81	q1_ao_20_e3_6_55_0001_55_0011_50_0014_48_0031
-4289.42	0.723	-72.763	2.351	0.81	q1_ao_20_e3_6_55_0001_55_0011_50_0014_48_0037
-4289.3	0.688	-74.11	2.348	0.81	q1_ao_20_e3_6_55_0001_55_0011_50_0016_48_0001
-4288.12	0.714	-73.531	2.331	0.81	q1_ao_20_e3_6_55_0001_55_0011_50_0016_48_0012
-4285.59	0.765	-74.637	2.342	0.81	q1_ao_20_e3_6_55_0001_55_0011_50_0016_48_0022
-4280.44	0.919	-71.667	2.32	0.81	q1_ao_20_e3_6_55_0001_55_0011_50_0023_48_0023
-4282.38	0.94	-72.862	2.31	0.81	q1_ao_20_e3_6_55_0001_55_0011_50_0023_48_0027
-4280.77	0.858	-71.003	2.291	0.81	q1_ao_20_e3_6_55_0001_55_0011_50_0025_48_0028
-4283.18	0.807	-70.869	2.349	0.81	q1_ao_20_e3_6_55_0001_55_0011_50_0030_48_0021
-4281.58	0.821	-71.138	2.336	0.81	q1_ao_20_e3_6_55_0001_55_0011_50_0030_48_0028
-4282.72	0.838	-71.128	2.329	0.81	q1_ao_20_e3_6_55_0001_55_0011_50_0030_48_0030
-4280.71	0.751	-72.218	2.324	0.81	q1_ao_20_e3_6_55_0001_55_0011_50_0030_48_0034
-4284.03	0.748	-70.986	2.333	0.81	q1_ao_20_e3_6_6_0001_55_0009_50_0014_49_0008
-4288.29	0.872	-72.857	2.323	0.81	q1_ao_20_e3_6_6_0001_55_0009_50_0014_49_0009
-4287.71	0.669	-73.593	2.323	0.81	q1_ao_20_e3_6_6_0001_55_0009_50_0014_49_0018
-4287.94	0.923	-72.837	2.378	0.81	q1_ao_20_e3_6_7_0001_56_0017_51_0009_49_0004
-4285.61	1.052	-70.528	2.383	0.81	q1_ao_20_e3_6_7_0001_56_0017_51_0009_49_0018
-4287.03	1.04	-72.15	2.373	0.81	q1_ao_20_e3_6_7_0001_56_0017_51_0009_49_0021
-4283.83	0.997	-73.62	2.35	0.81	q1_ao_20_e3_6_7_0001_56_0017_51_0029_49_0014
-4288.59	0.874	-70.138	2.338	0.81	q1_ao_20_e3_6_7_0001_56_0017_51_0030_49_0036
-4285.97	0.73	-76.291	2.366	0.81	q1_ao_20_e3_6_7_0001_56_0017_51_0033_49_0021
-4288.92	0.864	-72.62	2.362	0.81	q1_ao_20_e3_6_7_0001_56_0017_51_0033_49_0035
-4279.46	1.079	-71.472	2.346	0.81	q1_ao_20_e3_6_7_0001_56_0017_51_0039_49_0012
-4283.81	0.939	-72.154	2.357	0.81	q1_ao_20_e3_6_7_0001_56_0032_51_0033_49_0029
-4288.71	0.984	-71.111	2.285	0.81	q1_ao_20_e3_6_90_0001_56_0001_51_0010_49_0040
-4252.44	0.678	-69.911	2.351	0.81	q1_ao_10_e3_9_9_0002_5_0013_6_0019_4_0005
-4252.18	0.763	-70.354	2.34	0.81	q1_ao_10_e3_9_9_0002_5_0013_6_0019_4_0028
-4239.67	0.859	-69.854	2.375	0.81	q1_ao_10_e3_9_9_0002_5_0013_6_0019_4_0031
-4251.71	0.655	-69.499	2.343	0.81	q1_ao_10_e3_9_9_0002_5_0013_6_0019_4_0032
-4287.91	0.826	-71.188	2.367	0.81	q1_ao_20_e3_8_10_0001_58_0014_55_0035_52_0039
-4295.79	0.931	-75.323	2.51	0.81	q1_ao_2_e3_4_36_0002_61_0033_57_0001_54_0026
-4294.64	0.713	-73.379	2.495	0.81	q1_ao_2_e3_4_36_0002_61_0033_57_0017_54_0001
-4294.25	0.681	-74.849	2.497	0.81	q1_ao_2_e3_4_36_0002_61_0033_57_0017_54_0006
-4295.09	0.697	-74.631	2.495	0.81	q1_ao_2_e3_4_36_0002_61_0033_57_0017_54_0008
-4296.23	0.688	-76.077	2.489	0.81	q1_ao_2_e3_4_36_0002_61_0033_57_0017_54_0019
-4293.06	0.752	-74.373	2.488	0.81	q1_ao_2_e3_4_36_0002_61_0033_57_0017_54_0036
-4293.82	0.739	-72.631	2.48	0.81	q1_ao_2_e3_4_36_0002_61_0033_57_0033_54_0016
-4288.09	0.886	-70.318	2.449	0.81	q1_ao_2_e3_4_36_0002_61_0033_57_0033_54_0029
-4294.16	0.593	-76.332	2.492	0.81	q1_ao_2_e3_6_37_0002_62_0019_57_0015_54_0010
-4292.76	0.497	-75.352	2.488	0.81	q1_ao_2_e3_6_37_0002_62_0019_57_0015_54_0017
-4289.18	1.465	-73.566	2.566	0.81	q1_ao_2_e3_6_37_0002_62_0030_57_0001_55_0002
-4290.06	1.535	-73.323	2.574	0.81	q1_ao_2_e3_6_37_0002_62_0030_57_0001_55_0006
-4293.78	1.374	-75.275	2.559	0.81	q1_ao_2_e3_6_37_0002_62_0030_57_0001_55_0013
-4293.9	1.435	-76.166	2.551	0.81	q1_ao_2_e3_6_37_0002_62_0030_57_0001_55_0029
-4293.24	1.302	-75.266	2.563	0.81	q1_ao_2_e3_6_37_0002_62_0030_57_0001_55_0035
-4292.51	1.407	-74.391	2.565	0.81	q1_ao_2_e3_6_37_0002_62_0030_57_0003_55_0004
-4293.23	1.446	-74.801	2.557	0.81	q1_ao_2_e3_6_37_0002_62_0030_57_0003_55_0008
-4292.35	1.493	-76.134	2.583	0.81	q1_ao_2_e3_6_37_0002_62_0030_57_0003_55_0014
-4294.05	1.464	-75.859	2.573	0.81	q1_ao_2_e3_6_37_0002_62_0030_57_0003_55_0023
-4293.22	1.28	-74.433	2.556	0.81	q1_ao_2_e3_6_37_0002_62_0030_57_0003_55_0033
-4294.54	1.138	-76.586	2.557	0.81	q1_ao_2_e3_6_37_0002_62_0030_57_0005_55_0017
-4296.01	1.507	-78.987	2.57	0.81	q1_ao_2_e3_6_37_0002_62_0030_57_0005_55_0025
-4293.29	1.507	-75.067	2.574	0.81	q1_ao_2_e3_6_37_0002_62_0030_57_0005_55_0026
-4295.11	1.291	-77.409	2.572	0.81	q1_ao_2_e3_6_37_0002_62_0030_57_0005_55_0030
-4289.77	0.99	-75.316	2.568	0.81	q1_ao_2_e3_6_37_0002_62_0030_57_0005_55_0039
-4289.95	1.488	-73.545	2.567	0.81	q1_ao_2_e3_6_37_0002_62_0030_57_0006_55_0018
-4294.18	1.457	-75.94	2.564	0.81	q1_ao_2_e3_6_37_0002_62_0030_57_0006_55_0023
-4295.85	1.528	-76.464	2.576	0.81	q1_ao_2_e3_6_37_0002_62_0030_57_0006_55_0029
-4294.26	1.538	-76.173	2.584	0.81	q1_ao_2_e3_6_37_0002_62_0030_57_0015_55_0001
-4291.85	1.414	-80.22	2.571	0.81	q1_ao_2_e3_6_37_0002_62_0030_57_0020_55_0004
-4292.68	1.476	-75.851	2.581	0.81	q1_ao_2_e3_6_37_0002_62_0030_57_0020_55_0006
-4294.26	1.321	-76.951	2.573	0.81	q1_ao_2_e3_6_37_0002_62_0030_57_0020_55_0010
-4292.01	1.219	-75.246	2.59	0.81	q1_ao_2_e3_6_37_0002_62_0030_57_0020_55_0012
-4296.42	1.451	-78.49	2.564	0.81	q1_ao_2_e3_6_37_0002_62_0030_57_0020_55_0014
-4293.52	1.578	-75.378	2.573	0.81	q1_ao_2_e3_6_37_0002_62_0030_57_0026_56_0022
-4294.05	1.425	-77.636	2.582	0.81	q1_ao_2_e3_6_37_0002_62_0030_57_0029_56_0001
-4289.97	1.665	-76.504	2.574	0.81	q1_ao_2_e3_6_37_0002_62_0030_57_0039_56_0025
-4292.72	1.36	-74.754	2.55	0.81	q1_ao_2_e3_6_37_0002_62_0030_57_0039_56_0028
-4286.3	0.781	-71.349	2.313	0.81	q1_ao_2_e3_6_59_0001_62_0012_57_0002_56_0021
-4293.39	1.111	-71.832	2.332	0.81	q1_ao_2_e3_6_59_0001_62_0012_57_0011_56_0017
-4292.94	0.98	-73.575	2.282	0.81	q1_ao_2_e3_6_59_0001_62_0012_57_0011_56_0028
-4295.35	0.94	-73.517	2.332	0.81	q1_ao_2_e3_6_59_0001_62_0012_57_0011_56_0038
-4296.35	0.846	-72.892	2.35	0.81	q1_ao_2_e3_6_59_0001_62_0023_58_0030_56_0006
-4294.95	0.903	-68.906	2.344	0.81	q1_ao_2_e3_6_59_0001_62_0023_58_0030_56_0015
-4296.07	1.014	-72.53	2.372	0.81	q1_ao_2_e3_6_59_0001_62_0023_58_0030_56_0023
-4298.51	0.921	-74.376	2.383	0.81	q1_ao_3_e3_1_21_0001_64_0011_59_0017_58_0035
-4291.69	0.892	-71.418	2.314	0.81	q1_ao_3_e3_1_21_0001_64_0011_59_0034_58_0020
-4299.42	0.709	-79.375	2.536	0.81	q1_ao_3_e3_1_21_0001_64_0019_59_0001_59_0029
-4307.08	0.739	-82.284	2.478	0.81	q1_ao_3_e3_1_21_0001_64_0019_59_0006_59_0038
-4245.78	0.954	-69.889	2.333	0.81	q1_ao_10_e3_9_9_0002_5_0013_6_0040_5_0023
-4294.01	1.729	-72.272	2.194	0.81	q1_ao_11_e3_1_60_0002_5_0031_8_0003_5_0005
-4295.43	1.469	-73.011	2.17	0.81	q1_ao_11_e3_1_60_0002_5_0031_8_0003_5_0008
-4296.09	1.527	-74.273	2.174	0.81	q1_ao_11_e3_1_60_0002_5_0031_8_0003_5_0015
-4297.18	0.961	-76.521	2.17	0.81	q1_ao_11_e3_1_60_0002_5_0031_8_0003_5_0028
-4294.08	1.63	-73.659	2.179	0.81	q1_ao_11_e3_1_60_0002_5_0031_8_0003_5_0034
-4294	1.615	-74.117	2.18	0.81	q1_ao_11_e3_1_60_0002_5_0031_8_0003_5_0036
-4296.75	0.997	-72.643	2.42	0.81	q1_ao_3_e3_1_21_0001_64_0020_59_0014_60_0004
-4296.62	0.925	-75.695	2.384	0.81	q1_ao_3_e3_1_21_0001_64_0020_59_0014_60_0013
-4295.16	0.921	-72.645	2.423	0.81	q1_ao_3_e3_1_21_0001_64_0020_59_0014_60_0028
-4292.2	0.991	-69.879	2.422	0.81	q1_ao_3_e3_1_21_0001_64_0020_59_0014_60_0040
-4294.02	0.922	-71.989	2.44	0.81	q1_ao_3_e3_1_21_0001_64_0020_59_0020_60_0034
-4293.82	0.7	-71.665	2.413	0.81	q1_ao_3_e3_1_21_0001_64_0020_59_0038_60_0010
-4295.31	0.741	-73.048	2.367	0.81	q1_ao_3_e3_1_21_0001_64_0020_59_0038_60_0034
-4298.64	0.691	-70.954	2.489	0.81	q1_ao_3_e3_1_21_0001_64_0036_59_0010_60_0007
-4300.62	0.735	-77.753	2.455	0.81	q1_ao_3_e3_1_76_0002_64_0014_59_0012_60_0012
-4299.2	0.761	-72.129	2.364	0.81	q1_ao_3_e3_2_15_0001_64_0001_59_0002_61_0006
-4290.34	0.821	-69.642	2.283	0.81	q1_ao_3_e3_2_15_0001_64_0001_59_0002_61_0016
-4294.63	0.818	-72.763	2.334	0.81	q1_ao_3_e3_2_15_0001_64_0001_59_0002_61_0021
-4304.45	0.673	-72.35	2.269	0.81	q1_ao_3_e3_2_15_0001_64_0001_59_0002_61_0028
-4292.72	0.766	-71.543	2.286	0.81	q1_ao_3_e3_2_15_0001_64_0001_59_0002_61_0037
-4295.12	0.851	-69.88	2.371	0.81	q1_ao_3_e3_2_15_0001_64_0001_59_0005_61_0016
-4295.7	0.913	-68.647	2.375	0.81	q1_ao_3_e3_2_15_0001_64_0001_59_0005_61_0018
-4304.22	0.706	-69.526	2.341	0.81	q1_ao_3_e3_2_15_0001_64_0001_59_0005_61_0019
-4300.81	0.546	-70.764	2.336	0.81	q1_ao_3_e3_2_15_0001_64_0001_59_0011_61_0004
-4295.94	0.813	-71.108	2.359	0.81	q1_ao_3_e3_2_15_0001_64_0001_59_0011_61_0009
-4295.59	0.672	-71.151	2.319	0.81	q1_ao_3_e3_2_15_0001_64_0001_59_0011_61_0016
-4303.31	0.719	-71.877	2.303	0.81	q1_ao_3_e3_2_15_0001_64_0001_59_0029_61_0006
-4295.64	0.787	-73.164	2.326	0.81	q1_ao_3_e3_2_15_0001_64_0001_59_0029_61_0031
-4303.98	0.613	-70.692	2.338	0.81	q1_ao_3_e3_2_15_0001_64_0006_59_0011_61_0011
-4298.52	0.579	-74.933	2.33	0.81	q1_ao_3_e3_2_15_0001_64_0006_59_0011_61_0021
-4297.51	0.586	-71.465	2.345	0.81	q1_ao_3_e3_2_15_0001_64_0006_59_0011_61_0029
-4303.11	0.607	-71.107	2.312	0.81	q1_ao_3_e3_2_15_0001_64_0006_59_0011_61_0035
-4302.64	0.558	-69.936	2.349	0.81	q1_ao_3_e3_2_15_0001_64_0006_59_0011_61_0040
-4299.64	0.545	-73.77	2.39	0.81	q1_ao_3_e3_2_15_0001_64_0006_59_0032_61_0002
-4305.82	0.501	-71.686	2.276	0.81	q1_ao_3_e3_2_15_0001_64_0006_59_0032_61_0011
-4301.91	0.552	-69.513	2.37	0.81	q1_ao_3_e3_2_15_0001_64_0006_59_0040_61_0012
-4298.71	0.689	-71.566	2.407	0.81	q1_ao_3_e3_2_15_0001_64_0006_59_0040_61_0031
-4296.13	0.638	-68.464	2.418	0.81	q1_ao_3_e3_2_15_0001_64_0006_59_0040_61_0032
-4305.59	0.524	-73.245	2.344	0.81	q1_ao_3_e3_2_15_0001_64_0013_60_0001_61_0003
-4297.99	0.63	-75.66	2.337	0.81	q1_ao_3_e3_2_15_0001_64_0013_60_0001_61_0009
-4301.15	0.63	-73.97	2.326	0.81	q1_ao_3_e3_2_15_0001_64_0013_60_0001_61_0024
-4297.58	0.67	-75.607	2.327	0.81	q1_ao_3_e3_2_15_0001_64_0013_60_0001_61_0032
-4300.63	0.584	-75.025	2.378	0.81	q1_ao_3_e3_2_15_0001_64_0013_60_0009_62_0001
-4300.27	0.549	-73.252	2.378	0.81	q1_ao_3_e3_2_15_0001_64_0013_60_0009_62_0017
-4302.73	0.473	-75.602	2.358	0.81	q1_ao_3_e3_2_15_0001_64_0013_60_0009_62_0022
-4299.05	0.567	-74.501	2.376	0.81	q1_ao_3_e3_2_15_0001_64_0013_60_0030_62_0002
-4296.84	0.463	-73.943	2.337	0.81	q1_ao_3_e3_2_15_0001_64_0013_60_0030_62_0022
-4300.56	0.652	-71.228	2.384	0.81	q1_ao_3_e3_2_15_0001_64_0013_60_0030_62_0036
-4296.32	1.064	-71.333	2.369	0.81	q1_ao_3_e3_2_15_0001_64_0029_60_0007_62_0009
-4298.92	0.761	-73.271	2.395	0.81	q1_ao_3_e3_2_15_0001_64_0029_60_0015_62_0001
-4298.62	0.655	-75.004	2.328	0.81	q1_ao_3_e3_2_15_0001_64_0029_60_0015_62_0007
-4296.58	0.658	-72.31	2.355	0.81	q1_ao_3_e3_2_15_0001_64_0029_60_0015_62_0015
-4295.07	0.644	-74.662	2.371	0.81	q1_ao_3_e3_2_15_0001_64_0029_60_0015_62_0027
-4304.23	0.812	-70.571	2.354	0.81	q1_ao_3_e3_2_15_0001_64_0034_60_0021_62_0012
-4302.06	0.696	-74.67	2.362	0.81	q1_ao_3_e3_2_15_0001_64_0034_60_0021_62_0018
-4305.9	0.804	-71.522	2.329	0.81	q1_ao_3_e3_2_15_0001_64_0034_60_0021_62_0033
-4297.14	0.913	-70.503	2.361	0.81	q1_ao_3_e3_2_15_0001_64_0034_60_0021_62_0037
-4295.58	0.945	-70.897	2.383	0.81	q1_ao_3_e3_2_15_0001_64_0034_60_0021_62_0040
-4301.55	0.772	-69.065	2.306	0.81	q1_ao_3_e3_2_15_0001_64_0034_60_0032_62_0040
-4294.63	0.869	-71.76	2.364	0.81	q1_ao_3_e3_2_15_0001_64_0035_60_0015_63_0024
-4299.46	0.656	-68.733	2.296	0.81	q1_ao_3_e3_2_15_0001_64_0035_60_0016_63_0020
-4308.2	0.718	-70.247	2.323	0.81	q1_ao_3_e3_2_15_0001_64_0035_60_0016_63_0030
-4304.98	0.584	-70.965	2.297	0.81	q1_ao_3_e3_2_15_0001_64_0035_60_0016_63_0040
-4299.22	0.899	-66.92	2.329	0.81	q1_ao_3_e3_2_15_0001_64_0035_60_0020_63_0029
-4295.96	0.916	-71.147	2.378	0.81	q1_ao_3_e3_2_15_0001_64_0035_60_0020_63_0031
-4295.62	0.81	-71.467	2.371	0.81	q1_ao_3_e3_2_15_0001_64_0035_60_0034_63_0013
-4296.25	0.572	-74.855	2.315	0.81	q1_ao_3_e3_2_15_0001_64_0037_60_0019_63_0009
-4296.35	0.716	-73.238	2.351	0.81	q1_ao_3_e3_2_15_0001_64_0037_60_0034_64_0013
-4301.76	0.646	-72.541	2.361	0.81	q1_ao_3_e3_2_15_0001_64_0037_60_0034_64_0025
-4299.92	0.642	-74.594	2.297	0.81	q1_ao_3_e3_2_15_0001_64_0037_60_0039_64_0013
-4296.29	0.584	-74.092	2.327	0.81	q1_ao_3_e3_2_15_0001_64_0037_60_0039_64_0019
-4299.82	0.514	-72.876	2.379	0.81	q1_ao_3_e3_2_15_0001_64_0037_60_0039_64_0025
-4296.7	0.63	-72.053	2.296	0.81	q1_ao_3_e3_2_15_0001_64_0037_60_0039_64_0027
-4296.25	0.717	-70.097	2.363	0.81	q1_ao_3_e3_2_15_0001_64_0038_60_0001_64_0027
-4298.17	0.672	-71.985	2.377	0.81	q1_ao_3_e3_2_15_0001_64_0038_60_0001_64_0033
-4304.09	0.677	-69.708	2.312	0.81	q1_ao_3_e3_2_15_0001_64_0038_60_0001_64_0036
-4302.8	0.565	-71.006	2.32	0.81	q1_ao_3_e3_2_15_0001_64_0038_60_0011_64_0002
-4305.02	0.626	-71.287	2.341	0.81	q1_ao_3_e3_2_15_0001_64_0038_60_0011_64_0006
-4304.9	0.651	-70.358	2.354	0.81	q1_ao_3_e3_2_15_0001_64_0038_60_0011_64_0007
-4304.65	0.569	-71.781	2.325	0.81	q1_ao_3_e3_2_15_0001_64_0038_60_0011_64_0013
-4299.34	0.688	-72.618	2.351	0.81	q1_ao_3_e3_2_15_0001_64_0038_60_0011_64_0035
-4297.24	0.722	-72.206	2.327	0.81	q1_ao_3_e3_2_15_0001_64_0038_60_0027_64_0010
-4293.46	0.689	-71.356	2.362	0.81	q1_ao_3_e3_2_15_0001_64_0038_60_0027_64_0027
-4296.99	0.883	-74.887	2.455	0.81	q1_ao_3_e3_2_8_0001_65_0025_60_0007_64_0006
-4298.23	1.03	-69.41	2.335	0.81	q1_ao_3_e3_2_8_0001_65_0025_60_0016_64_0021
-4299.13	0.947	-72.815	2.309	0.81	q1_ao_3_e3_2_8_0001_65_0025_60_0016_64_0032
-4294.56	0.976	-74.416	2.32	0.81	q1_ao_3_e3_4_5_0001_65_0031_61_0003_64_0016
-4293.02	0.798	-73.252	2.34	0.81	q1_ao_3_e3_4_5_0001_65_0031_61_0003_64_0026
-4297.18	0.749	-73.91	2.588	0.81	q1_ao_3_e3_6_31_0002_67_0028_61_0004_66_0007
-4298.05	0.89	-74.554	2.601	0.81	q1_ao_3_e3_6_31_0002_67_0028_61_0004_66_0022
-4296.78	0.538	-75.205	2.391	0.81	q1_ao_3_e3_6_5_0001_67_0019_62_0010_67_0016
-4303.11	0.99	-73.227	2.319	0.81	q1_ao_3_e3_6_5_0001_67_0022_62_0002_68_0006
-4297.35	0.964	-76.559	2.309	0.81	q1_ao_3_e3_6_5_0001_67_0022_62_0002_68_0025
-4295.1	1.162	-75.887	2.356	0.81	q1_ao_3_e3_6_5_0001_67_0022_62_0002_68_0026
-4306.41	0.965	-75.444	2.338	0.81	q1_ao_3_e3_6_5_0001_67_0022_62_0002_68_0028
-4304.85	1.14	-75.614	2.321	0.81	q1_ao_3_e3_6_5_0001_67_0022_62_0003_68_0004
-4300.16	1.125	-71.889	2.332	0.81	q1_ao_3_e3_6_5_0001_67_0022_62_0003_68_0022
-4297.85	1.056	-71.491	2.335	0.81	q1_ao_3_e3_6_5_0001_67_0022_62_0003_68_0025
-4301.12	1.288	-72.422	2.323	0.81	q1_ao_3_e3_6_5_0001_67_0022_62_0003_68_0033
-4301.28	1.309	-73.093	2.34	0.81	q1_ao_3_e3_6_5_0001_67_0022_62_0003_68_0034
-4297.85	1.079	-71.565	2.316	0.81	q1_ao_3_e3_6_5_0001_67_0022_62_0003_68_0035
-4298.35	1.094	-72.16	2.344	0.81	q1_ao_3_e3_6_5_0001_67_0022_62_0006_68_0006
-4303.53	1.102	-73.232	2.307	0.81	q1_ao_3_e3_6_5_0001_67_0022_62_0006_68_0007
-4302.27	1.321	-73.543	2.325	0.81	q1_ao_3_e3_6_5_0001_67_0022_62_0006_68_0012
-4300.97	1.087	-72.01	2.34	0.81	q1_ao_3_e3_6_5_0001_67_0022_62_0006_68_0014
-4301.33	1.124	-71.684	2.318	0.81	q1_ao_3_e3_6_5_0001_67_0022_62_0006_68_0016
-4296.23	1.298	-73.561	2.361	0.81	q1_ao_3_e3_6_5_0001_67_0022_62_0006_68_0027
-4302.19	1.449	-73.576	2.327	0.81	q1_ao_3_e3_6_5_0001_67_0022_62_0006_68_0032
-4303.58	1.194	-73.475	2.247	0.81	q1_ao_3_e3_6_5_0001_67_0022_62_0012_68_0008
-4304.14	1.131	-73.007	2.302	0.81	q1_ao_3_e3_6_5_0001_67_0022_62_0012_68_0022
-4301.68	1.215	-72.183	2.292	0.81	q1_ao_3_e3_6_5_0001_67_0022_62_0012_68_0027
-4301.86	1.108	-73.236	2.313	0.81	q1_ao_3_e3_6_5_0001_67_0022_62_0012_68_0028
-4302.47	1.138	-73.956	2.272	0.81	q1_ao_3_e3_6_5_0001_67_0022_62_0012_68_0032
-4300.91	0.96	-72.207	2.255	0.81	q1_ao_3_e3_6_5_0001_67_0022_62_0017_68_0001
-4302.06	1.012	-71.599	2.266	0.81	q1_ao_3_e3_6_5_0001_67_0022_62_0017_68_0002
-4297.81	0.978	-73.777	2.289	0.81	q1_ao_3_e3_6_5_0001_67_0022_62_0017_68_0005
-4306.34	0.889	-74.505	2.266	0.81	q1_ao_3_e3_6_5_0001_67_0022_62_0017_68_0017
-4305.52	0.911	-74.335	2.242	0.81	q1_ao_3_e3_6_5_0001_67_0022_62_0017_68_0018
-4303.16	0.977	-71.82	2.262	0.81	q1_ao_3_e3_6_5_0001_67_0022_62_0017_68_0030
-4304.68	0.505	-73.908	2.5	0.81	q1_ao_3_e3_6_5_0001_67_0040_62_0004_68_0001
-4301.92	0.464	-74.929	2.496	0.81	q1_ao_3_e3_6_5_0001_67_0040_62_0004_68_0024
-4294.74	0.61	-72.523	2.487	0.81	q1_ao_3_e3_6_5_0001_67_0040_62_0004_68_0036
-4303.13	0.512	-73.146	2.447	0.81	q1_ao_3_e3_6_5_0001_67_0040_62_0016_68_0032
-4304.41	0.557	-73.085	2.469	0.81	q1_ao_3_e3_6_5_0001_67_0040_62_0027_68_0001
-4298.9	0.68	-69.519	2.451	0.81	q1_ao_3_e3_6_5_0001_67_0040_62_0036_69_0017
-4304.04	0.669	-71.903	2.354	0.81	q1_ao_3_e3_6_5_0001_67_0040_62_0038_69_0003
-4301.4	0.51	-72.163	2.47	0.81	q1_ao_3_e3_6_5_0001_67_0040_62_0038_69_0010
-4303.31	0.529	-73.189	2.454	0.81	q1_ao_3_e3_6_5_0001_67_0040_62_0038_69_0024
-4300.33	0.535	-72.214	2.475	0.81	q1_ao_3_e3_6_5_0001_67_0040_62_0040_69_0010
-4302.93	0.522	-72.925	2.43	0.81	q1_ao_3_e3_6_5_0001_67_0040_62_0040_69_0011
-4300.92	0.564	-72.838	2.46	0.81	q1_ao_3_e3_6_5_0001_67_0040_62_0040_69_0021
-4302.79	0.673	-73.228	2.317	0.81	q1_ao_3_e3_6_5_0001_67_0040_62_0040_69_0027
-4303.28	0.635	-73.143	2.343	0.81	q1_ao_3_e3_6_5_0001_67_0040_62_0040_69_0030
-4306.35	1.018	-75.572	2.352	0.81	q1_ao_3_e3_7_26_0001_68_0006_62_0010_69_0015
-4304.65	1.022	-76.014	2.394	0.81	q1_ao_3_e3_7_26_0001_68_0006_62_0010_69_0037
-4306.03	0.995	-74.777	2.385	0.81	q1_ao_3_e3_7_26_0001_68_0006_62_0021_69_0014
-4300.22	1.275	-75.573	2.419	0.81	q1_ao_3_e3_7_26_0001_68_0006_62_0021_69_0022
-4303.67	1.046	-74.801	2.392	0.81	q1_ao_3_e3_7_26_0001_68_0006_62_0022_69_0009
-4307.02	0.967	-76.719	2.389	0.81	q1_ao_3_e3_7_26_0001_68_0006_62_0022_69_0022
-4298.47	1.193	-75.717	2.413	0.81	q1_ao_3_e3_7_26_0001_68_0006_62_0022_69_0033
-4307.57	1.091	-76.289	2.389	0.81	q1_ao_3_e3_7_26_0001_68_0006_62_0035_69_0002
-4307.34	1.104	-76.391	2.359	0.81	q1_ao_3_e3_7_26_0001_68_0006_62_0035_69_0003
-4308.63	1.009	-76.337	2.381	0.81	q1_ao_3_e3_7_26_0001_68_0006_62_0035_69_0004
-4306.23	1.098	-74.687	2.389	0.81	q1_ao_3_e3_7_26_0001_68_0006_62_0035_69_0021
-4289.22	0.825	-73.492	2.349	0.81	q1_ao_3_e3_7_37_0002_68_0028_62_0040_69_0011
-4293.02	0.947	-71.011	2.373	0.81	q1_ao_3_e3_7_37_0002_68_0028_62_0040_69_0020
-4289.5	0.792	-74.048	2.26	0.81	q1_ao_11_e3_2_41_0002_7_0001_8_0006_6_0002
-4293.42	0.845	-71.087	2.311	0.81	q1_ao_11_e3_2_41_0002_7_0001_8_0006_6_0003
-4293.46	0.823	-72.177	2.315	0.81	q1_ao_11_e3_2_41_0002_7_0001_8_0006_6_0005
-4288.76	0.844	-72.574	2.245	0.81	q1_ao_11_e3_2_41_0002_7_0001_8_0006_6_0014
-4294.28	0.793	-72.178	2.324	0.81	q1_ao_11_e3_2_41_0002_7_0001_8_0006_6_0029
-4289.31	0.804	-71.743	2.301	0.81	q1_ao_11_e3_2_41_0002_7_0001_8_0006_6_0031
-4289.44	0.812	-71.255	2.318	0.81	q1_ao_11_e3_2_41_0002_7_0001_8_0006_6_0032
-4294.56	0.752	-71.286	2.313	0.81	q1_ao_11_e3_2_41_0002_7_0001_8_0006_6_0034
-4294.74	0.841	-71.929	2.321	0.81	q1_ao_11_e3_2_41_0002_7_0001_8_0006_6_0038
-4295.87	0.809	-72.485	2.256	0.81	q1_ao_11_e3_2_41_0002_7_0001_8_0006_6_0039
-4289.83	0.788	-72.239	2.306	0.81	q1_ao_11_e3_2_41_0002_7_0001_8_0006_6_0040
-4285.94	0.822	-70.239	2.313	0.81	q1_ao_11_e3_2_41_0002_7_0001_8_0010_6_0008
-4290.92	0.821	-70.456	2.319	0.81	q1_ao_11_e3_2_41_0002_7_0001_8_0010_6_0009
-4292.57	0.788	-71.995	2.321	0.81	q1_ao_11_e3_2_41_0002_7_0001_8_0010_6_0021
-4289.11	0.816	-70.992	2.302	0.81	q1_ao_11_e3_2_41_0002_7_0001_8_0010_6_0025
-4293.24	0.815	-71.872	2.314	0.81	q1_ao_11_e3_2_41_0002_7_0001_8_0019_6_0004
-4287.2	0.839	-72.187	2.245	0.81	q1_ao_11_e3_2_41_0002_7_0001_8_0019_6_0005
-4292.29	0.894	-71.995	2.252	0.81	q1_ao_11_e3_2_41_0002_7_0001_8_0019_6_0006
-4292.11	0.801	-71.052	2.309	0.81	q1_ao_11_e3_2_41_0002_7_0001_8_0019_6_0013
-4293.47	0.88	-70.787	2.258	0.81	q1_ao_11_e3_2_41_0002_7_0001_8_0019_6_0015
-4296.12	0.859	-71.722	2.26	0.81	q1_ao_11_e3_2_41_0002_7_0001_8_0019_6_0022
-4294.28	0.88	-71.594	2.303	0.81	q1_ao_11_e3_2_41_0002_7_0001_8_0019_6_0023
-4288.9	0.79	-73.502	2.279	0.81	q1_ao_11_e3_2_41_0002_7_0001_8_0019_6_0026
-4282.5	0.983	-70.089	2.255	0.81	q1_ao_11_e3_2_41_0002_7_0001_8_0019_6_0038
-4291.81	0.761	-71.629	2.28	0.81	q1_ao_11_e3_2_41_0002_7_0001_8_0022_6_0006
-4288.68	0.822	-70.606	2.297	0.81	q1_ao_11_e3_2_41_0002_7_0001_8_0022_6_0015
-4288.71	0.808	-71.092	2.302	0.81	q1_ao_11_e3_2_41_0002_7_0001_8_0022_6_0016
-4295.53	0.832	-70.518	2.321	0.81	q1_ao_11_e3_2_41_0002_7_0001_8_0022_6_0019
-4294.44	0.751	-72.038	2.297	0.81	q1_ao_11_e3_2_41_0002_7_0001_8_0022_6_0020
-4290.58	0.755	-71.03	2.274	0.81	q1_ao_11_e3_2_41_0002_7_0001_8_0022_6_0023
-4287.98	0.695	-71.008	2.307	0.81	q1_ao_11_e3_2_41_0002_7_0001_8_0022_6_0031
-4291.47	0.785	-69.234	2.31	0.81	q1_ao_11_e3_2_41_0002_7_0001_8_0022_6_0035
-4288.3	0.875	-71.451	2.279	0.81	q1_ao_11_e3_2_41_0002_7_0001_8_0022_6_0037
-4291.88	0.843	-69.284	2.321	0.81	q1_ao_11_e3_2_41_0002_7_0001_8_0022_6_0040
-4285.77	0.859	-70	2.25	0.81	q1_ao_11_e3_2_41_0002_7_0001_8_0025_6_0006
-4294.43	0.815	-71.771	2.285	0.81	q1_ao_11_e3_2_41_0002_7_0001_8_0025_6_0009
-4289.82	0.795	-72.355	2.25	0.81	q1_ao_11_e3_2_41_0002_7_0001_8_0025_6_0025
-4294.39	0.836	-72.755	2.306	0.81	q1_ao_11_e3_2_41_0002_7_0001_8_0025_6_0028
-4289.55	0.813	-72.233	2.234	0.81	q1_ao_11_e3_2_41_0002_7_0001_8_0025_6_0034
-4288.7	0.78	-73.881	2.233	0.81	q1_ao_11_e3_2_41_0002_7_0001_8_0025_6_0035
-4288.34	0.812	-72.283	2.203	0.81	q1_ao_11_e3_2_41_0002_7_0001_8_0025_6_0036
-4291	0.811	-72.362	2.284	0.81	q1_ao_11_e3_2_41_0002_7_0001_8_0033_6_0009
-4295.11	0.837	-71.741	2.297	0.81	q1_ao_11_e3_2_41_0002_7_0001_8_0033_6_0022
-4288.91	0.806	-70.18	2.298	0.81	q1_ao_11_e3_2_41_0002_7_0001_8_0033_6_0034
-4291.14	0.842	-69.823	2.318	0.81	q1_ao_11_e3_2_41_0002_7_0001_8_0033_6_0036
-4295.86	0.87	-71.27	2.306	0.81	q1_ao_11_e3_2_41_0002_7_0001_8_0033_6_0037
-4286.89	0.896	-71.521	2.309	0.81	q1_ao_11_e3_2_41_0002_7_0001_8_0036_6_0003
-4285.81	0.759	-72.347	2.292	0.81	q1_ao_11_e3_2_41_0002_7_0001_8_0036_6_0005
-4287.13	0.823	-71.647	2.298	0.81	q1_ao_11_e3_2_41_0002_7_0001_8_0036_6_0008
-4285.87	0.859	-72.167	2.254	0.81	q1_ao_11_e3_2_41_0002_7_0001_8_0036_6_0009
-4288.35	0.759	-71.897	2.305	0.81	q1_ao_11_e3_2_41_0002_7_0001_8_0036_6_0020
-4297.1	0.926	-73.915	2.324	0.81	q1_ao_3_e3_7_5_0001_68_0017_62_0017_70_0010
-4292.65	0.986	-73.885	2.293	0.81	q1_ao_3_e3_7_5_0001_68_0017_62_0032_70_0002
-4292.95	0.827	-69.048	2.29	0.81	q1_ao_3_e3_7_5_0001_68_0017_62_0032_70_0020
-4302.96	0.68	-71.861	2.271	0.81	q1_ao_3_e3_7_5_0001_68_0017_62_0035_70_0015
-4293.52	0.886	-70.209	2.345	0.81	q1_ao_3_e3_7_5_0001_68_0017_62_0035_70_0017
-4293.33	0.861	-71.829	2.338	0.81	q1_ao_3_e3_8_21_0001_69_0003_62_0009_70_0036
-4294.46	0.875	-69.407	2.304	0.81	q1_ao_3_e3_8_21_0001_69_0003_62_0027_70_0010
-4290.33	0.94	-66.882	2.442	0.81	q1_ao_3_e3_8_21_0001_69_0003_62_0027_70_0026
-4295.83	0.879	-74.136	2.341	0.81	q1_ao_3_e3_8_21_0001_69_0014_62_0002_70_0013
-4304.72	0.667	-71.639	2.305	0.81	q1_ao_3_e3_8_21_0001_69_0014_62_0002_70_0039
-4296.74	0.917	-68.757	2.379	0.81	q1_ao_3_e3_8_21_0001_69_0014_62_0034_71_0003
-4294.96	0.814	-71.264	2.385	0.81	q1_ao_3_e3_8_21_0001_69_0014_62_0034_71_0031
-4305.12	0.787	-76.351	2.462	0.81	q1_ao_3_e3_8_21_0001_69_0023_63_0004_71_0011
-4301.08	0.932	-74.22	2.45	0.81	q1_ao_3_e3_8_21_0001_69_0023_63_0004_71_0014
-4300.28	0.873	-74.46	2.46	0.81	q1_ao_3_e3_8_21_0001_69_0023_63_0004_71_0020
-4302.53	0.822	-75.582	2.463	0.81	q1_ao_3_e3_8_21_0001_69_0023_63_0004_71_0025
-4303.1	0.817	-75.931	2.465	0.81	q1_ao_3_e3_8_21_0001_69_0023_63_0004_71_0026
-4303.63	0.785	-76.439	2.464	0.81	q1_ao_3_e3_8_21_0001_69_0023_63_0004_71_0033
-4306.64	0.719	-76.326	2.457	0.81	q1_ao_3_e3_8_21_0001_69_0023_63_0004_71_0036
-4301.43	0.795	-75.079	2.464	0.81	q1_ao_3_e3_8_21_0001_69_0023_63_0004_71_0037
-4304.63	0.82	-77.006	2.463	0.81	q1_ao_3_e3_8_21_0001_69_0023_63_0004_71_0040
-4300.38	0.923	-74.841	2.471	0.81	q1_ao_3_e3_8_21_0001_69_0023_63_0005_71_0003
-4303.66	0.786	-76.18	2.477	0.81	q1_ao_3_e3_8_21_0001_69_0023_63_0005_71_0011
-4305.85	0.812	-75.838	2.468	0.81	q1_ao_3_e3_8_21_0001_69_0023_63_0005_71_0022
-4301.78	0.987	-75.1	2.468	0.81	q1_ao_3_e3_8_21_0001_69_0023_63_0005_71_0024
-4300.47	0.977	-73.741	2.467	0.81	q1_ao_3_e3_8_21_0001_69_0023_63_0005_71_0028
-4301.2	0.953	-74.423	2.441	0.81	q1_ao_3_e3_8_21_0001_69_0023_63_0005_71_0029
-4302.08	0.848	-75.044	2.43	0.81	q1_ao_3_e3_8_21_0001_69_0023_63_0005_71_0031
-4303.27	0.828	-76.117	2.44	0.81	q1_ao_3_e3_8_21_0001_69_0023_63_0005_71_0033
-4305.23	0.715	-77.127	2.44	0.81	q1_ao_3_e3_8_21_0001_69_0023_63_0005_71_0035
-4302.7	0.841	-75.973	2.455	0.81	q1_ao_3_e3_8_21_0001_69_0023_63_0005_71_0037
-4300.43	0.908	-74.846	2.466	0.81	q1_ao_3_e3_8_21_0001_69_0023_63_0005_71_0040
-4301.98	0.887	-75.316	2.469	0.81	q1_ao_3_e3_8_21_0001_69_0023_63_0010_71_0001
-4300.75	0.85	-76.141	2.48	0.81	q1_ao_3_e3_8_21_0001_69_0023_63_0010_71_0009
-4301.84	0.88	-74.635	2.464	0.81	q1_ao_3_e3_8_21_0001_69_0023_63_0010_71_0010
-4299.02	0.826	-74.813	2.47	0.81	q1_ao_3_e3_8_21_0001_69_0023_63_0010_71_0012
-4298.33	0.88	-75.15	2.471	0.81	q1_ao_3_e3_8_21_0001_69_0023_63_0010_71_0019
-4305.39	0.807	-76.858	2.472	0.81	q1_ao_3_e3_8_21_0001_69_0023_63_0010_71_0028
-4300.91	0.896	-74.73	2.472	0.81	q1_ao_3_e3_8_21_0001_69_0023_63_0010_71_0035
-4306.14	0.787	-75.922	2.47	0.81	q1_ao_3_e3_8_21_0001_69_0023_63_0010_71_0036
-4301.62	0.837	-76.393	2.462	0.81	q1_ao_3_e3_8_21_0001_69_0023_63_0010_71_0037
-4299.56	0.842	-74.861	2.467	0.81	q1_ao_3_e3_8_21_0001_69_0023_63_0010_71_0040
-4301.91	0.835	-74.74	2.463	0.81	q1_ao_3_e3_8_21_0001_69_0023_63_0021_71_0005
-4299.3	0.913	-73.835	2.453	0.81	q1_ao_3_e3_8_21_0001_69_0023_63_0021_71_0017
-4302.32	0.719	-76.269	2.465	0.81	q1_ao_3_e3_8_21_0001_69_0023_63_0021_71_0029
-4302.98	0.835	-74.768	2.461	0.81	q1_ao_3_e3_8_21_0001_69_0023_63_0029_71_0003
-4300.47	0.819	-76.149	2.439	0.81	q1_ao_3_e3_8_21_0001_69_0023_63_0029_71_0005
-4301.65	0.852	-73.996	2.452	0.81	q1_ao_3_e3_8_21_0001_69_0023_63_0029_71_0010
-4304.06	0.797	-76.423	2.421	0.81	q1_ao_3_e3_8_21_0001_69_0023_63_0029_71_0013
-4298.94	0.841	-74.352	2.461	0.81	q1_ao_3_e3_8_21_0001_69_0023_63_0029_71_0019
-4301.91	0.769	-76.554	2.44	0.81	q1_ao_3_e3_8_21_0001_69_0023_63_0029_71_0022
-4289.74	0.884	-70.921	2.421	0.81	q1_ao_3_e3_8_21_0001_69_0023_63_0036_71_0004
-4298.35	0.55	-67.046	2.374	0.81	q1_ao_3_e3_8_21_0001_69_0027_63_0016_71_0030
-4306.48	0.584	-70.588	2.423	0.81	q1_ao_3_e3_8_21_0001_69_0027_63_0016_71_0034
-4296.75	0.819	-70.813	2.321	0.81	q1_ao_3_e3_8_21_0001_69_0033_63_0018_72_0040
-4299.52	0.853	-69.064	2.387	0.81	q1_ao_3_e3_8_21_0001_69_0034_63_0034_72_0001
-4291.65	0.858	-70.654	2.43	0.81	q1_ao_3_e3_8_21_0001_69_0034_63_0034_72_0026
-4298.79	0.76	-68.876	2.397	0.81	q1_ao_3_e3_8_21_0001_69_0034_63_0034_72_0030
-4289.51	0.867	-71.541	2.426	0.81	q1_ao_3_e3_8_21_0001_69_0040_63_0008_72_0002
-4292.36	0.938	-70.538	2.488	0.81	q1_ao_3_e3_8_21_0001_69_0040_63_0008_72_0009
-4295.17	0.804	-71.179	2.492	0.81	q1_ao_3_e3_8_21_0001_69_0040_63_0008_72_0011
-4294.19	0.803	-71.085	2.484	0.81	q1_ao_3_e3_8_21_0001_69_0040_63_0008_72_0024
-4294.01	0.895	-70.232	2.384	0.81	q1_ao_3_e3_8_21_0001_69_0040_63_0008_72_0038
-4295.4	0.742	-72.839	2.493	0.81	q1_ao_3_e3_8_21_0001_69_0040_63_0008_72_0040
-4293.36	0.771	-71.483	2.504	0.81	q1_ao_3_e3_8_21_0001_69_0040_63_0040_72_0018
-4293.91	0.864	-70.687	2.378	0.81	q1_ao_3_e3_8_21_0001_69_0040_63_0040_72_0019
-4293.18	0.768	-71.027	2.498	0.81	q1_ao_3_e3_8_21_0001_69_0040_63_0040_72_0022
-4289.35	0.767	-70.427	2.485	0.81	q1_ao_3_e3_8_21_0001_69_0040_63_0040_72_0028
-4292.9	0.78	-71.812	2.468	0.81	q1_ao_3_e3_8_21_0001_69_0040_63_0040_72_0029
-4293.11	0.795	-71.181	2.498	0.81	q1_ao_3_e3_8_21_0001_69_0040_63_0040_72_0037
-4294.28	0.783	-73.212	2.485	0.81	q1_ao_3_e3_8_21_0001_69_0040_63_0040_72_0038
-4298.4	0.916	-71.656	2.382	0.81	q1_ao_3_e3_8_61_0002_69_0018_64_0032_73_0021
-4293.59	0.876	-78.771	2.506	0.81	q1_ao_3_e3_8_65_0001_69_0002_64_0001_74_0006
-4295.22	0.897	-85.475	2.484	0.81	q1_ao_3_e3_8_65_0001_69_0002_64_0001_74_0011
-4294.67	0.84	-79.889	2.433	0.81	q1_ao_3_e3_8_65_0001_69_0002_64_0001_74_0022
-4296.23	0.769	-80.527	2.441	0.81	q1_ao_3_e3_8_65_0001_69_0002_64_0001_74_0025
-4291.35	0.824	-75.46	2.44	0.81	q1_ao_3_e3_8_65_0001_69_0002_64_0002_74_0002
-4294.99	0.701	-76.665	2.442	0.81	q1_ao_3_e3_8_65_0001_69_0002_64_0002_74_0016
-4290.56	0.813	-73.923	2.466	0.81	q1_ao_3_e3_8_65_0001_69_0002_64_0005_74_0007
-4295.49	0.924	-76.028	2.432	0.81	q1_ao_3_e3_8_65_0001_69_0002_64_0013_75_0015
-4293.14	0.922	-73.603	2.464	0.81	q1_ao_3_e3_8_65_0001_69_0002_64_0013_75_0018
-4297.38	0.683	-77.38	2.473	0.81	q1_ao_3_e3_8_65_0001_69_0002_64_0017_75_0024
-4299.39	0.948	-78.253	2.501	0.81	q1_ao_3_e3_8_65_0001_69_0002_64_0017_75_0035
-4302.12	0.827	-76.085	2.492	0.81	q1_ao_3_e3_8_65_0001_69_0006_64_0015_75_0010
-4300.34	0.862	-75.6	2.499	0.81	q1_ao_3_e3_8_65_0001_69_0006_64_0015_75_0017
-4302.1	0.849	-76.26	2.485	0.81	q1_ao_3_e3_8_65_0001_69_0006_64_0015_75_0021
-4300.56	0.647	-75.056	2.49	0.81	q1_ao_3_e3_8_65_0001_69_0006_64_0015_75_0038
-4302.14	0.886	-76.487	2.493	0.81	q1_ao_3_e3_8_65_0001_69_0006_64_0015_75_0039
-4298.22	0.92	-75.308	2.511	0.81	q1_ao_3_e3_8_65_0001_69_0006_64_0017_75_0034
-4300.97	0.737	-74.91	2.499	0.81	q1_ao_3_e3_8_65_0001_69_0006_64_0025_75_0006
-4298.57	0.892	-76.523	2.5	0.81	q1_ao_3_e3_8_65_0001_69_0006_64_0025_75_0008
-4300.15	0.727	-74.902	2.503	0.81	q1_ao_3_e3_8_65_0001_69_0006_64_0025_75_0012
-4300.64	0.761	-76.938	2.503	0.81	q1_ao_3_e3_8_65_0001_69_0006_64_0025_75_0031
-4300.35	0.887	-76.725	2.503	0.81	q1_ao_3_e3_8_65_0001_69_0006_64_0025_75_0033
-4298.36	1.071	-74.956	2.505	0.81	q1_ao_3_e3_8_65_0001_69_0006_64_0027_75_0001
-4303.02	0.985	-77.014	2.503	0.81	q1_ao_3_e3_8_65_0001_69_0006_64_0027_75_0007
-4298.11	1.085	-75.592	2.512	0.81	q1_ao_3_e3_8_65_0001_69_0006_64_0027_75_0009
-4303.56	0.738	-76.416	2.502	0.81	q1_ao_3_e3_8_65_0001_69_0006_64_0027_75_0020
-4290.84	0.999	-74.926	2.392	0.81	q1_ao_3_e3_8_65_0001_69_0006_64_0028_75_0024
-4295.58	0.821	-78.128	2.378	0.81	q1_ao_3_e3_8_65_0001_69_0006_64_0028_75_0032
-4299.36	0.634	-76.285	2.406	0.81	q1_ao_3_e3_8_65_0001_69_0006_64_0028_75_0034
-4300.19	0.86	-75.733	2.4	0.81	q1_ao_3_e3_8_65_0001_69_0006_64_0029_76_0001
-4291.6	0.638	-73.322	2.397	0.81	q1_ao_3_e3_8_65_0001_69_0006_64_0029_76_0023
-4298.6	0.714	-76.423	2.381	0.81	q1_ao_3_e3_8_65_0001_69_0006_64_0029_76_0034
-4303.79	0.664	-76.541	2.472	0.81	q1_ao_3_e3_8_65_0001_69_0006_64_0031_76_0002
-4301.03	0.669	-74.195	2.427	0.81	q1_ao_3_e3_8_65_0001_69_0006_64_0031_76_0004
-4303.13	0.71	-76.853	2.476	0.81	q1_ao_3_e3_8_65_0001_69_0006_64_0031_76_0011
-4302.38	0.788	-75.882	2.491	0.81	q1_ao_3_e3_8_65_0001_69_0006_64_0031_76_0032
-4299.73	1.156	-76.784	2.511	0.81	q1_ao_3_e3_8_65_0001_69_0006_64_0039_76_0002
-4303.24	0.724	-78.308	2.515	0.81	q1_ao_3_e3_8_65_0001_69_0006_64_0039_76_0008
-4299.8	1.026	-75.909	2.483	0.81	q1_ao_3_e3_8_65_0001_69_0006_64_0039_76_0012
-4296.77	0.823	-76.42	2.397	0.81	q1_ao_3_e3_8_65_0001_69_0006_64_0039_76_0017
-4297.17	1.116	-76.612	2.525	0.81	q1_ao_3_e3_8_65_0001_69_0006_64_0039_76_0022
-4299.7	0.842	-75.469	2.503	0.81	q1_ao_3_e3_8_65_0001_69_0006_64_0039_76_0024
-4296.53	1.174	-74.216	2.537	0.81	q1_ao_3_e3_8_65_0001_69_0006_64_0039_76_0034
-4300.26	1.117	-77.263	2.53	0.81	q1_ao_3_e3_8_65_0001_69_0006_64_0039_76_0035
-4301.89	1.069	-76.739	2.526	0.81	q1_ao_3_e3_8_65_0001_69_0006_64_0039_76_0039
-4293.61	0.742	-70.851	2.458	0.81	q1_ao_3_e3_8_65_0001_69_0019_65_0025_76_0013
-4298.69	0.763	-69.993	2.33	0.81	q1_ao_3_e3_8_93_0001_69_0026_65_0005_76_0034
-4303.71	0.795	-74.558	2.267	0.81	q1_ao_3_e3_9_22_0001_69_0006_66_0003_76_0036
-4302.36	0.613	-71.439	2.343	0.81	q1_ao_3_e3_9_22_0001_69_0006_66_0036_76_0006
-4301.74	0.725	-73.462	2.288	0.81	q1_ao_3_e3_9_22_0001_69_0006_66_0036_76_0015
-4300.71	0.67	-71.243	2.325	0.81	q1_ao_3_e3_9_22_0001_69_0006_66_0036_76_0020
-4293.04	0.785	-71.845	2.392	0.81	q1_ao_3_e3_9_22_0001_69_0030_66_0008_77_0040
-4300.18	0.706	-72.88	2.363	0.81	q1_ao_3_e3_9_22_0001_69_0030_66_0012_77_0029
-4294.22	0.913	-72.61	2.304	0.81	q1_ao_3_e3_9_22_0001_69_0030_66_0012_77_0039
-4292.47	0.812	-71.422	2.389	0.81	q1_ao_3_e3_9_22_0001_69_0030_66_0024_77_0002
-4302.17	0.628	-70.46	2.347	0.81	q1_ao_3_e3_9_22_0001_69_0030_66_0024_77_0007
-4290.24	0.765	-71.228	2.388	0.81	q1_ao_3_e3_9_22_0001_69_0030_66_0024_77_0023
-4291.42	0.869	-72.28	2.335	0.81	q1_ao_3_e3_9_22_0001_69_0030_66_0024_77_0039
-4303.46	0.643	-72.772	2.331	0.81	q1_ao_3_e3_9_22_0001_69_0030_66_0030_77_0011
-4289.45	0.864	-70.067	2.374	0.81	q1_ao_3_e3_9_22_0001_69_0030_66_0030_77_0029
-4303.39	0.775	-72.425	2.32	0.81	q1_ao_3_e3_9_22_0001_69_0030_66_0030_77_0030
-4300.66	0.739	-70.395	2.311	0.81	q1_ao_3_e3_9_22_0001_69_0030_66_0031_77_0027
-4301.85	0.628	-70.933	2.337	0.81	q1_ao_3_e3_9_22_0001_69_0030_66_0032_77_0003
-4296.11	0.68	-75.104	2.342	0.81	q1_ao_3_e3_9_22_0001_69_0030_66_0032_77_0031
-4302.73	0.724	-73.358	2.32	0.81	q1_ao_3_e3_9_22_0001_69_0030_66_0032_77_0038
-4306.06	0.792	-72.605	2.293	0.81	q1_ao_3_e3_9_22_0001_69_0030_66_0037_77_0017
-4298.22	0.959	-73.829	2.329	0.81	q1_ao_3_e3_9_98_0002_70_0006_67_0030_79_0001
-4293.38	1.646	-72.377	2.297	0.81	q1_ao_3_e3_9_98_0002_70_0035_68_0024_79_0026
-4293.51	1.481	-71.094	2.343	0.81	q1_ao_3_e3_9_98_0002_70_0035_68_0024_79_0028
-4292.35	1.699	-71.967	2.304	0.81	q1_ao_3_e3_9_98_0002_70_0035_68_0024_79_0031
-4289.98	1.834	-70.968	2.402	0.81	q1_ao_3_e3_9_98_0002_70_0035_68_0024_79_0033
-4290.05	1.282	-73.634	2.407	0.81	q1_ao_3_e3_9_98_0002_70_0040_68_0001_79_0003
-4290.41	1.456	-71.654	2.407	0.81	q1_ao_3_e3_9_98_0002_70_0040_68_0001_79_0038
-4293.13	0.849	-71.966	2.302	0.81	q1_ao_11_e3_2_41_0002_7_0001_8_0038_7_0009
-4285.49	0.852	-72.021	2.314	0.81	q1_ao_11_e3_2_41_0002_7_0001_8_0038_7_0010
-4287.49	0.781	-72.785	2.302	0.81	q1_ao_11_e3_2_41_0002_7_0001_8_0038_7_0013
-4286.23	0.798	-71.269	2.325	0.81	q1_ao_11_e3_2_41_0002_7_0001_8_0038_7_0014
-4284.92	0.757	-72.437	2.317	0.81	q1_ao_11_e3_2_41_0002_7_0001_8_0038_7_0029
-4287.6	0.831	-71.855	2.303	0.81	q1_ao_11_e3_2_41_0002_7_0001_8_0038_7_0035
-4295.74	0.794	-73.602	2.314	0.81	q1_ao_11_e3_2_41_0002_7_0001_8_0038_7_0037
-4294.95	0.752	-72.852	2.254	0.81	q1_ao_11_e3_2_41_0002_7_0017_8_0011_7_0003
-4287.13	0.827	-71.886	2.257	0.81	q1_ao_11_e3_2_41_0002_7_0017_8_0011_7_0037
-4292.39	0.811	-70.136	2.315	0.81	q1_ao_11_e3_2_41_0002_7_0031_9_0020_7_0002
-4295.46	0.791	-74.019	2.306	0.81	q1_ao_11_e3_2_41_0002_7_0031_9_0020_7_0003
-4292.71	0.939	-72.701	2.303	0.81	q1_ao_11_e3_2_41_0002_7_0031_9_0020_7_0012
-4287.54	0.881	-73.539	2.285	0.81	q1_ao_11_e3_2_41_0002_7_0031_9_0020_7_0016
-4290.55	0.938	-71.896	2.297	0.81	q1_ao_11_e3_2_41_0002_7_0031_9_0020_7_0029
-4293.43	0.924	-72.56	2.37	0.81	q1_ao_11_e3_2_41_0002_7_0039_9_0020_7_0009
-4293.77	0.921	-72.016	2.326	0.81	q1_ao_11_e3_2_41_0002_7_0039_9_0020_7_0011
-4291.46	0.842	-70.191	2.325	0.81	q1_ao_11_e3_2_41_0002_7_0039_9_0020_7_0012
-4282.57	0.827	-69.77	2.313	0.81	q1_ao_11_e3_2_41_0002_7_0039_9_0020_7_0014
-4290.98	0.819	-71.375	2.295	0.81	q1_ao_11_e3_2_41_0002_7_0039_9_0020_7_0020
-4293.34	0.777	-70.248	2.341	0.81	q1_ao_11_e3_2_41_0002_7_0039_9_0020_7_0021
-4286.25	0.608	-69.915	2.337	0.81	q1_ao_11_e3_3_61_0002_9_0035_10_0025_7_0038
-4285.74	0.759	-68.934	2.43	0.81	q1_ao_11_e3_4_43_0001_9_0001_10_0014_7_0013
-4287.79	0.79	-68.806	2.397	0.81	q1_ao_11_e3_4_43_0001_9_0001_10_0014_7_0018
-4293.09	0.719	-71.412	2.391	0.81	q1_ao_11_e3_4_43_0001_9_0001_10_0014_7_0026
-4289.12	1.263	-72.78	2.441	0.81	q1_ao_3_e3_9_98_0002_70_0040_68_0018_80_0035
-4293.04	1.305	-72.161	2.431	0.81	q1_ao_3_e3_9_98_0002_70_0040_68_0022_80_0005
-4288.91	1.232	-71.552	2.438	0.81	q1_ao_3_e3_9_98_0002_70_0040_68_0026_80_0019
-4291.98	1.429	-71.377	2.407	0.81	q1_ao_3_e3_9_98_0002_70_0040_68_0026_80_0031
-4294.96	1.378	-73.043	2.431	0.81	q1_ao_3_e3_9_98_0002_70_0040_68_0037_80_0013
-4291.77	1.439	-69.181	2.392	0.81	q1_ao_3_e3_9_98_0002_70_0040_68_0038_80_0009
-4236.31	0.802	-69.554	2.385	0.81	q1_ao_4_e3_5_59_0002_73_0018_69_0009_81_0001
-4236.66	0.822	-72.165	2.312	0.81	q1_ao_4_e3_5_59_0002_73_0018_69_0009_81_0007
-4237.41	0.908	-71.531	2.392	0.81	q1_ao_4_e3_5_59_0002_73_0018_69_0009_81_0009
-4237.29	0.926	-70.946	2.384	0.81	q1_ao_4_e3_5_59_0002_73_0018_69_0009_81_0010
-4235.33	0.976	-70.839	2.392	0.81	q1_ao_4_e3_5_59_0002_73_0018_69_0009_81_0012
-4237.55	0.928	-70.911	2.397	0.81	q1_ao_4_e3_5_59_0002_73_0018_69_0009_81_0017
-4237.31	0.892	-71.365	2.361	0.81	q1_ao_4_e3_5_59_0002_73_0018_69_0009_81_0027
-4236.76	0.897	-71.931	2.351	0.81	q1_ao_4_e3_5_59_0002_73_0018_69_0009_81_0033
-4236.01	0.862	-71.168	2.361	0.81	q1_ao_4_e3_5_59_0002_73_0018_69_0009_81_0035
-4239.3	1.065	-72.737	2.394	0.81	q1_ao_4_e3_5_59_0002_73_0018_69_0038_81_0007
-4240.64	0.903	-73.015	2.381	0.81	q1_ao_4_e3_5_59_0002_73_0018_69_0038_81_0013
-4237.83	1.085	-72.548	2.397	0.81	q1_ao_4_e3_5_59_0002_73_0018_69_0038_81_0018
-4237.55	0.975	-72.021	2.397	0.81	q1_ao_4_e3_5_59_0002_73_0018_69_0038_81_0020
-4285.93	0.698	-73.91	2.35	0.81	q1_ao_6_e3_2_87_0002_83_0010_78_0039_84_0003
-4285.27	0.567	-73.2	2.354	0.81	q1_ao_6_e3_2_87_0002_83_0010_78_0039_84_0006
-4287.11	0.743	-74.608	2.397	0.81	q1_ao_6_e3_2_87_0002_83_0010_78_0039_84_0028
-4283.56	0.746	-72.719	2.417	0.81	q1_ao_6_e3_2_87_0002_83_0010_78_0039_84_0037
-4280.95	1.183	-71.819	2.334	0.81	q1_ao_6_e3_4_79_0001_84_0010_79_0004_84_0011
-4283.28	1.084	-71.177	2.333	0.81	q1_ao_6_e3_4_79_0001_84_0010_79_0004_84_0015
-4282.38	1.142	-71.802	2.341	0.81	q1_ao_6_e3_4_79_0001_84_0010_79_0004_84_0016
-4284.74	1.163	-72.845	2.345	0.81	q1_ao_6_e3_4_79_0001_84_0010_79_0004_84_0019
-4282.07	1.231	-71.22	2.323	0.81	q1_ao_6_e3_4_79_0001_84_0010_79_0004_84_0023
-4285	1.177	-72.79	2.346	0.81	q1_ao_6_e3_4_79_0001_84_0010_79_0004_84_0038
-4284.11	0.924	-73.531	2.464	0.81	q1_ao_6_e3_4_79_0001_84_0010_79_0005_84_0017
-4268.42	0.857	-70.634	2.351	0.81	q1_ao_6_e3_4_79_0001_84_0010_79_0005_84_0018
-4286.36	1.203	-73.493	2.345	0.81	q1_ao_6_e3_4_79_0001_84_0010_79_0006_85_0008
-4285.47	1.208	-72.882	2.322	0.81	q1_ao_6_e3_4_79_0001_84_0010_79_0006_85_0030
-4268.2	0.965	-72.748	2.445	0.81	q1_ao_6_e3_4_79_0001_84_0010_79_0009_85_0011
-4285.29	1.134	-73.159	2.352	0.81	q1_ao_6_e3_4_79_0001_84_0010_79_0009_85_0012
-4285.27	1.217	-73.333	2.348	0.81	q1_ao_6_e3_4_79_0001_84_0010_79_0009_85_0014
-4275.3	0.929	-69.317	2.357	0.81	q1_ao_6_e3_4_79_0001_84_0010_79_0009_85_0015
-4282.74	1.096	-72.002	2.347	0.81	q1_ao_6_e3_4_79_0001_84_0010_79_0009_85_0018
-4266.52	1.089	-70.023	2.337	0.81	q1_ao_6_e3_4_79_0001_84_0010_79_0009_85_0021
-4286.36	1.001	-74.284	2.456	0.81	q1_ao_6_e3_4_79_0001_84_0010_79_0009_85_0022
-4284.38	0.975	-72.616	2.461	0.81	q1_ao_6_e3_4_79_0001_84_0010_79_0009_85_0033
-4274.75	1.429	-71.752	2.328	0.81	q1_ao_6_e3_4_79_0001_84_0010_79_0012_85_0004
-4285.11	1.091	-71.844	2.328	0.81	q1_ao_6_e3_4_79_0001_84_0010_79_0012_85_0006
-4284.2	1.254	-72.724	2.343	0.81	q1_ao_6_e3_4_79_0001_84_0010_79_0012_85_0024
-4286.19	1.438	-73.475	2.341	0.81	q1_ao_6_e3_4_79_0001_84_0010_79_0012_85_0030
-4284.46	1.14	-72.456	2.334	0.81	q1_ao_6_e3_4_79_0001_84_0010_79_0022_85_0002
-4275.49	0.987	-73.037	2.26	0.81	q1_ao_6_e3_4_79_0001_84_0010_79_0022_85_0005
-4286.62	1.166	-71.389	2.298	0.81	q1_ao_6_e3_4_79_0001_84_0010_79_0022_85_0013
-4282.77	1.155	-71.236	2.33	0.81	q1_ao_6_e3_4_79_0001_84_0010_79_0022_85_0014
-4288.62	1.101	-74.101	2.335	0.81	q1_ao_6_e3_4_79_0001_84_0010_79_0022_85_0031
-4284.59	0.942	-73.287	2.46	0.81	q1_ao_6_e3_4_79_0001_84_0010_79_0038_85_0010
-4280.31	0.776	-70.083	2.417	0.81	q1_ao_6_e3_7_52_0001_86_0023_82_0023_85_0003
-4269.99	0.498	-73.762	2.304	0.81	q1_ao_6_e3_9_68_0002_87_0024_84_0008_86_0004
-4279.76	0.589	-75.091	2.336	0.81	q1_ao_6_e3_9_68_0002_87_0024_84_0008_86_0016
-4268.81	0.831	-74.831	2.312	0.81	q1_ao_6_e3_9_68_0002_87_0024_84_0008_86_0019
-4267.61	0.983	-73.181	2.353	0.81	q1_ao_6_e3_9_68_0002_87_0024_84_0008_86_0026
-4267.21	0.907	-73.677	2.273	0.81	q1_ao_6_e3_9_68_0002_87_0024_84_0008_86_0034
-4270.06	0.908	-74.491	2.322	0.81	q1_ao_6_e3_9_68_0002_87_0024_84_0008_86_0040
-4282.56	0.419	-75.763	2.318	0.81	q1_ao_6_e3_9_68_0002_87_0024_84_0017_86_0026
-4281.15	0.806	-75.627	2.262	0.81	q1_ao_6_e3_9_68_0002_87_0024_84_0017_86_0034
-4271.4	0.862	-73.615	2.329	0.81	q1_ao_6_e3_9_68_0002_87_0024_84_0020_86_0024
-4268.29	1.944	-70.821	2.375	0.81	q1_ao_6_e3_9_9_0002_88_0001_84_0027_86_0007
-4267.55	1.952	-70.51	2.382	0.81	q1_ao_6_e3_9_9_0002_88_0001_84_0027_86_0016
-4264.18	1.898	-69.051	2.379	0.81	q1_ao_6_e3_9_9_0002_88_0001_84_0027_86_0028
-4265.43	1.797	-70.856	2.37	0.81	q1_ao_6_e3_9_9_0002_88_0001_84_0027_86_0036
-4272.28	0.5	-71.654	2.439	0.81	q1_ao_6_e3_9_9_0002_88_0001_84_0039_86_0014
-4265.25	0.584	-69.01	2.417	0.81	q1_ao_6_e3_9_9_0002_88_0001_84_0039_86_0040
-4294.47	0.868	-71.076	2.266	0.81	q1_ao_11_e3_4_43_0001_9_0004_11_0004_8_0008
-4288.82	0.974	-69.927	2.234	0.81	q1_ao_11_e3_4_43_0001_9_0004_11_0004_8_0009
-4286.01	0.734	-70.315	2.41	0.81	q1_ao_11_e3_4_43_0001_9_0004_11_0004_8_0025
-4289.31	0.737	-71.606	2.364	0.81	q1_ao_11_e3_4_43_0001_9_0004_11_0004_8_0026
-4293.45	0.694	-72.253	2.446	0.81	q1_ao_11_e3_4_43_0001_9_0004_11_0004_8_0036
-4294.51	0.766	-72.524	2.427	0.81	q1_ao_11_e3_4_43_0001_9_0006_11_0001_8_0002
-4288.95	0.821	-71.555	2.401	0.81	q1_ao_11_e3_4_43_0001_9_0006_11_0001_8_0013
-4294.29	0.833	-72.025	2.429	0.81	q1_ao_11_e3_4_43_0001_9_0006_11_0001_8_0030
-4290.63	0.775	-72.014	2.43	0.81	q1_ao_11_e3_4_43_0001_9_0006_11_0001_8_0035
-4244.88	1.933	-71.742	2.293	0.81	q1_ao_7_e3_6_4_0001_90_0013_86_0036_91_0006
-4244.69	1.912	-73.623	2.317	0.81	q1_ao_7_e3_6_4_0001_90_0013_86_0036_91_0038
-4247.62	3.022	-72.995	2.343	0.81	q1_ao_7_e3_6_4_0001_90_0032_86_0016_91_0002
-4248.11	2.118	-73.455	2.344	0.81	q1_ao_7_e3_6_4_0001_90_0032_86_0016_91_0030
-4250.88	2.96	-73.341	2.338	0.81	q1_ao_7_e3_6_4_0001_90_0032_86_0016_91_0036
-4248.27	2.058	-72.995	2.379	0.81	q1_ao_7_e3_6_79_0002_90_0014_86_0031_92_0015
-4243.12	0.771	-74.011	2.413	0.81	q1_ao_7_e3_9_88_0001_91_0022_91_0003_93_0005
-4244.06	0.805	-77.341	2.453	0.81	q1_ao_7_e3_9_88_0001_91_0022_91_0003_93_0007
-4241.78	0.781	-74.096	2.413	0.81	q1_ao_7_e3_9_88_0001_91_0022_91_0003_93_0016
-4241.37	0.844	-74.025	2.466	0.81	q1_ao_7_e3_9_88_0001_91_0022_91_0003_93_0025
-4238.19	0.829	-71.071	2.457	0.81	q1_ao_7_e3_9_88_0001_91_0022_91_0003_93_0037
-4243.34	2.148	-70.961	2.306	0.81	q1_ao_7_e3_9_88_0001_91_0022_91_0018_94_0002
-4243.03	2.507	-72.124	2.287	0.81	q1_ao_7_e3_9_88_0001_91_0022_91_0018_94_0010
-4244.73	1.825	-73.019	2.358	0.81	q1_ao_7_e3_9_88_0001_91_0022_91_0018_94_0012
-4243.29	2.493	-71.969	2.316	0.81	q1_ao_7_e3_9_88_0001_91_0022_91_0018_94_0033
-4240.88	2.555	-71.234	2.346	0.81	q1_ao_7_e3_9_88_0001_91_0022_91_0018_94_0036
-4243.33	2.43	-72.436	2.319	0.81	q1_ao_7_e3_9_88_0001_91_0022_91_0018_94_0037
-4240.77	0.831	-73.943	2.404	0.81	q1_ao_7_e3_9_88_0001_91_0022_91_0035_94_0001
-4238.81	0.844	-71.817	2.403	0.81	q1_ao_7_e3_9_88_0001_91_0022_91_0035_94_0002
-4243.27	0.845	-75.258	2.449	0.81	q1_ao_7_e3_9_88_0001_91_0022_91_0035_94_0010
-4241.2	0.894	-75.514	2.343	0.81	q1_ao_7_e3_9_88_0001_91_0022_91_0035_94_0013
-4244.45	0.842	-74.535	2.46	0.81	q1_ao_7_e3_9_88_0001_91_0022_91_0035_94_0027
-4255.3	0.806	-72.408	2.399	0.81	q1_ao_8_e3_1_3_0002_92_0003_91_0010_94_0004
-4250.61	0.859	-73.411	2.342	0.81	q1_ao_8_e3_3_66_0001_93_0029_92_0011_94_0021
-4256.45	1.026	-74.029	2.37	0.81	q1_ao_8_e3_8_14_0002_94_0037_92_0025_95_0021
-4254.51	1.091	-73.136	2.365	0.81	q1_ao_8_e3_8_14_0002_94_0037_92_0025_95_0039
-4256.64	0.982	-74.168	2.362	0.81	q1_ao_8_e3_8_14_0002_94_0037_92_0031_95_0014
-4255.07	1.062	-73.45	2.365	0.81	q1_ao_8_e3_8_14_0002_94_0037_92_0031_95_0040
-4255.3	1.054	-72.599	2.361	0.81	q1_ao_8_e3_8_14_0002_94_0037_92_0032_95_0003
-4258.76	1.048	-74.817	2.369	0.81	q1_ao_8_e3_8_14_0002_94_0037_92_0032_95_0019
-4257.87	0.928	-72.051	2.338	0.81	q1_ao_8_e3_8_89_0001_94_0037_93_0005_95_0019
-4260.09	0.923	-73.561	2.339	0.81	q1_ao_8_e3_8_89_0001_94_0037_93_0033_95_0020
-4259.23	1.063	-72.957	2.339	0.81	q1_ao_8_e3_8_89_0001_94_0037_93_0033_95_0027
-4282.41	0.695	-73.29	2.348	0.81	q1_ao_9_e3_2_65_0001_96_0031_93_0002_96_0021
-4281.42	0.712	-74.363	2.383	0.81	q1_ao_9_e3_2_65_0001_96_0031_93_0020_96_0035
-4284.07	0.711	-77.418	2.377	0.81	q1_ao_9_e3_5_38_0002_98_0011_95_0016_97_0017
-4284.48	0.729	-78.957	2.397	0.81	q1_ao_9_e3_5_38_0002_98_0011_95_0016_97_0027
-4283	0.69	-74.599	2.356	0.81	q1_ao_9_e3_5_38_0002_98_0011_95_0020_97_0017
-4278.3	0.69	-74.166	2.351	0.81	q1_ao_9_e3_5_38_0002_98_0011_95_0020_97_0032
-4276.09	0.786	-71.721	2.387	0.81	q1_ao_9_e3_6_20_0002_98_0011_95_0035_97_0030
-4277.03	0.791	-71.047	2.393	0.81	q1_ao_9_e3_6_20_0002_98_0011_95_0035_97_0031
-4284.67	0.646	-71.621	2.333	0.81	q1_ao_9_e3_6_20_0002_98_0016_95_0022_98_0001
-4284.23	0.811	-75.434	2.374	0.81	q1_ao_9_e3_6_37_0001_98_0040_96_0007_98_0029
-4286.4	0.804	-73.392	2.474	0.81	q1_ao_9_e3_6_37_0001_98_0040_96_0010_98_0017
-4284.34	0.83	-73.165	2.49	0.81	q1_ao_9_e3_6_37_0001_98_0040_96_0010_98_0036
-4283.56	2.178	-72.894	2.365	0.81	q1_ao_9_e3_6_3_0001_98_0008_95_0016_98_0016
-4282.48	1.45	-75.263	2.343	0.81	q1_ao_9_e3_6_3_0001_98_0008_95_0016_98_0019
-4282.85	2.055	-73.624	2.336	0.81	q1_ao_9_e3_6_3_0001_98_0008_95_0016_98_0034
-4282.52	1.454	-74.65	2.474	0.81	q1_ao_9_e3_6_3_0001_98_0008_95_0016_98_0039
-4285.77	0.856	-72.948	2.353	0.81	q1_ao_9_e3_6_37_0001_98_0040_96_0017_99_0013
-4284	0.791	-72.962	2.476	0.81	q1_ao_9_e3_6_37_0001_98_0040_96_0017_99_0015
-4284.78	0.789	-73.874	2.473	0.81	q1_ao_9_e3_6_37_0001_98_0040_96_0017_99_0029
-4286.81	1.015	-73.676	2.358	0.81	q1_ao_9_e3_6_37_0001_98_0040_96_0028_99_0004
-4284.98	0.837	-73.73	2.371	0.81	q1_ao_9_e3_6_37_0001_98_0040_96_0030_99_0009
-4285.31	1.136	-73.8	2.353	0.81	q1_ao_9_e3_6_37_0001_98_0040_96_0030_99_0036
-4281.55	0.977	-74.537	2.389	0.81	q1_ao_9_e3_6_37_0001_98_0040_96_0030_99_0039
-4287.06	0.853	-75.691	2.362	0.81	q1_ao_9_e3_6_37_0001_98_0040_96_0033_99_0006
-4287.42	0.688	-74.918	2.471	0.81	q1_ao_9_e3_6_37_0001_98_0040_96_0033_99_0040
-4277.47	0.648	-68.477	2.282	0.81	q1_ao_9_e3_7_52_0002_99_0027_97_0020_99_0034
-4278.55	0.694	-69.399	2.281	0.81	q1_ao_9_e3_7_82_0002_99_0010_97_0003_99_0028
-4291.19	0.805	-69.556	2.425	0.81	q1_ao_11_e3_4_43_0001_9_0033_11_0013_9_0004
-4287.23	0.823	-69.313	2.409	0.81	q1_ao_11_e3_4_43_0001_9_0033_11_0013_9_0008
-4295.12	0.831	-72.525	2.44	0.81	q1_ao_11_e3_4_43_0001_9_0033_11_0013_9_0016
-4289.97	0.723	-69.568	2.409	0.81	q1_ao_11_e3_4_43_0001_9_0033_11_0013_9_0017
-4293.68	0.82	-68.036	2.407	0.81	q1_ao_11_e3_4_43_0001_9_0033_11_0013_9_0018
-4289.82	0.784	-69.771	2.376	0.81	q1_ao_11_e3_4_43_0001_9_0033_11_0013_9_0037
-4291.54	0.885	-71.2	2.304	0.81	q1_ao_11_e3_4_43_0001_9_0038_12_0034_9_0031
-4246.02	0.83	-66.081	2.443	0.797	q1_ao_18_e3_6_33_0002
-4285.96	0.742	-67.103	2.416	0.797	q1_ao_9_e3_8_77_0001_100_0012
-4276.44	0.707	-63.239	2.541	0.797	q1_ao_9_e3_9_54_0002_100_0037
-4282.73	0.89	-66.531	2.365	0.797	q1_ao_11_e3_7_57_0001_12_0030
-4289.85	1.016	-67.429	2.441	0.797	q1_ao_11_e3_7_87_0001_12_0001
-4255.6	0.47	-69.72	2.566	0.797	q1_ao_12_e3_1_34_0001_15_0023
-4275.42	0.699	-67.449	2.488	0.797	q1_ao_14_e3_7_59_0002_26_0028
-4244.69	0.973	-68.808	2.407	0.797	q1_ao_18_e3_6_33_0002_41_0007
-4245.32	1.036	-68.959	2.435	0.797	q1_ao_18_e3_6_33_0002_41_0024
-4250.29	0.763	-63.374	2.338	0.797	q1_ao_18_e3_7_29_0002_42_0023
-4261.06	0.723	-71.674	2.454	0.797	q1_ao_19_e3_1_9_0001_43_0027
-4240.67	1.173	-72.486	2.387	0.797	q1_ao_10_e3_8_95_0002_4_0003
-4236.71	1.201	-69.767	2.427	0.797	q1_ao_10_e3_8_95_0002_4_0022
-4281.08	0.88	-68.173	2.3	0.797	q1_ao_20_e3_6_55_0001_55_0011
-4281.87	0.933	-66.849	2.301	0.797	q1_ao_20_e3_6_90_0001_56_0010
-4296.68	0.749	-64.361	2.397	0.797	q1_ao_3_e3_2_15_0001_64_0038
-4288.94	0.634	-68.731	2.491	0.797	q1_ao_3_e3_6_5_0001_67_0040
-4296.32	0.947	-68.224	2.383	0.797	q1_ao_3_e3_7_5_0001_68_0017
-4288.57	0.833	-60.863	2.492	0.797	q1_ao_3_e3_8_21_0001_69_0023
-4288.94	1.098	-63.026	2.393	0.797	q1_ao_3_e3_8_21_0001_69_0034
-4299.69	0.926	-67.173	2.43	0.797	q1_ao_3_e3_8_93_0001_69_0019
-4294.11	1.089	-63.976	2.415	0.797	q1_ao_3_e3_9_98_0002_70_0017
-4283.66	0.871	-68.864	2.34	0.797	q1_ao_11_e3_2_41_0002_7_0001
-4256.08	0.915	-72.337	2.402	0.797	q1_ao_8_e3_3_66_0001_93_0029
-4240.91	1.027	-66.56	2.416	0.797	q1_ao_8_e3_8_89_0001_94_0007
-4257.73	0.916	-70.228	2.447	0.797	q1_ao_8_e3_8_89_0001_94_0037
-4290.52	0.737	-71.159	2.456	0.797	q1_ao_11_e3_4_43_0001_9_0004
-4290.64	0.742	-72.044	2.403	0.797	q1_ao_11_e3_4_43_0001_9_0006
-4277.48	0.735	-61.331	2.443	0.797	q1_ao_9_e3_9_54_0002_100_0029_100_0036
-4280.76	0.698	-68.608	2.496	0.797	q1_ao_9_e3_9_54_0002_100_0037_100_0012
-4278.65	0.754	-67.88	2.476	0.797	q1_ao_9_e3_9_54_0002_100_0038_100_0007
-4281.67	0.73	-68.095	2.458	0.797	q1_ao_9_e3_9_54_0002_100_0038_100_0010
-4277.89	0.903	-64.728	2.469	0.797	q1_ao_9_e3_9_54_0002_100_0038_100_0026
-4273.66	0.797	-63.829	2.481	0.797	q1_ao_9_e3_9_54_0002_100_0038_100_0027
-4277.02	0.94	-65.836	2.46	0.797	q1_ao_9_e3_9_54_0002_100_0038_100_0034
-4279.01	0.758	-68.765	2.445	0.797	q1_ao_9_e3_9_54_0002_100_0038_100_0038
-4280.31	0.741	-65.365	2.492	0.797	q1_ao_11_e3_3_61_0002_9_0035_10_0003
-4288.62	0.795	-71.872	2.373	0.797	q1_ao_11_e3_4_43_0001_9_0001_10_0014
-4278.69	0.785	-69.735	2.492	0.797	q1_ao_11_e3_4_43_0001_9_0001_10_0035
-4288.99	0.762	-70.427	2.376	0.797	q1_ao_11_e3_4_43_0001_9_0004_11_0001
-4289.35	0.796	-72.693	2.414	0.797	q1_ao_11_e3_4_43_0001_9_0006_11_0001
-4285.7	0.729	-67.492	2.392	0.797	q1_ao_11_e3_4_43_0001_9_0006_11_0013
-4294.42	0.847	-69.965	2.398	0.797	q1_ao_11_e3_4_43_0001_9_0006_11_0014
-4288.27	0.8	-68.737	2.432	0.797	q1_ao_11_e3_4_43_0001_9_0006_11_0015
-4290.12	0.764	-70.433	2.362	0.797	q1_ao_11_e3_4_43_0001_9_0006_11_0030
-4286.32	0.859	-67.981	2.435	0.797	q1_ao_11_e3_4_43_0001_9_0006_11_0039
-4293.24	0.698	-69.867	2.421	0.797	q1_ao_11_e3_4_43_0001_9_0033_11_0002
-4291.18	0.751	-69.648	2.442	0.797	q1_ao_11_e3_4_43_0001_9_0033_11_0004
-4291.38	0.679	-69.023	2.383	0.797	q1_ao_11_e3_4_43_0001_9_0033_11_0005
-4286.66	0.739	-69.169	2.401	0.797	q1_ao_11_e3_4_43_0001_9_0036_12_0032
-4285.18	0.838	-69.984	2.434	0.797	q1_ao_11_e3_4_43_0001_9_0038_12_0002
-4287.77	0.822	-71.906	2.421	0.797	q1_ao_11_e3_4_43_0001_9_0038_12_0034
-4283.8	0.844	-70.393	2.296	0.797	q1_ao_11_e3_4_43_0001_9_0038_12_0036
-4282.02	1.223	-69.481	2.499	0.797	q1_ao_11_e3_6_68_0002_11_0008_13_0014
-4279.16	1.222	-64.074	2.484	0.797	q1_ao_11_e3_6_68_0002_11_0018_13_0029
-4287.93	0.894	-68.296	2.341	0.797	q1_ao_11_e3_7_57_0001_12_0030_14_0012
-4284.11	1.122	-67.987	2.361	0.797	q1_ao_11_e3_7_57_0001_12_0030_14_0019
-4288.93	0.944	-68.628	2.346	0.797	q1_ao_11_e3_7_57_0001_12_0030_14_0034
-4294.59	0.981	-69.742	2.44	0.797	q1_ao_11_e3_7_87_0001_12_0001_14_0008
-4284.28	1.047	-69.073	2.453	0.797	q1_ao_11_e3_7_87_0001_12_0001_14_0040
-4291.6	0.763	-68.655	2.442	0.797	q1_ao_11_e3_7_87_0001_12_0006_14_0010
-4292.66	1.039	-67.441	2.291	0.797	q1_ao_11_e3_7_87_0001_12_0025_15_0021
-4281.09	0.936	-66.609	2.506	0.797	q1_ao_11_e3_7_87_0001_12_0037_15_0016
-4283.62	1.127	-69.631	2.491	0.797	q1_ao_11_e3_7_87_0001_12_0037_15_0020
-4287.97	0.999	-68.979	2.43	0.797	q1_ao_11_e3_8_29_0001_13_0011_15_0035
-4288.41	0.94	-66.347	2.32	0.797	q1_ao_11_e3_9_52_0002_14_0024_19_0030
-4283.28	0.957	-66.653	2.503	0.797	q1_ao_11_e3_9_98_0001_14_0007_20_0012
-4287.87	0.935	-66.419	2.453	0.797	q1_ao_11_e3_9_98_0001_14_0017_20_0013
-4262.95	0.408	-75.003	2.587	0.797	q1_ao_12_e3_1_34_0001_15_0023_21_0001
-4263.29	0.377	-74.085	2.545	0.797	q1_ao_12_e3_1_34_0001_15_0023_21_0018
-4258.78	0.391	-70.221	2.554	0.797	q1_ao_12_e3_1_34_0001_15_0023_21_0029
-4262.13	0.463	-72.613	2.608	0.797	q1_ao_12_e3_2_70_0002_16_0022_21_0035
-4262.7	0.482	-73.517	2.612	0.797	q1_ao_12_e3_2_70_0002_16_0022_21_0036
-4262.04	0.456	-75.2	2.566	0.797	q1_ao_12_e3_2_70_0002_16_0022_21_0040
-4258.58	0.603	-73.948	2.432	0.797	q1_ao_12_e3_8_28_0002_17_0019_22_0026
-4246.58	0.894	-68.652	2.47	0.797	q1_ao_12_e3_8_28_0002_17_0019_22_0033
-4247.06	1.127	-71.287	2.381	0.797	q1_ao_13_e3_2_14_0002_18_0038_23_0005
-4235.03	1.892	-65.499	2.329	0.797	q1_ao_13_e3_2_22_0002_18_0031_23_0026
-4243.85	0.659	-69.034	2.543	0.797	q1_ao_13_e3_9_21_0002_21_0005_24_0004
-4240.74	0.729	-68.174	2.562	0.797	q1_ao_13_e3_9_21_0002_21_0040_25_0017
-4275.6	0.388	-71.683	2.543	0.797	q1_ao_14_e3_3_60_0002_24_0009_26_0012
-4271.82	0.417	-79.573	2.55	0.797	q1_ao_14_e3_3_60_0002_24_0009_26_0019
-4277.88	0.853	-68.647	2.475	0.797	q1_ao_14_e3_4_83_0002_25_0003_26_0010
-4280.05	0.529	-70.463	2.428	0.797	q1_ao_14_e3_4_83_0002_25_0003_26_0014
-4280.01	0.621	-70.585	2.401	0.797	q1_ao_14_e3_4_83_0002_25_0003_26_0030
-4281.45	0.532	-76.765	2.41	0.797	q1_ao_14_e3_4_83_0002_25_0027_26_0012
-4279.7	0.485	-73.216	2.415	0.797	q1_ao_14_e3_4_83_0002_25_0027_26_0040
-4281.34	1.21	-74.05	2.332	0.797	q1_ao_14_e3_4_98_0002_25_0024_27_0020
-4274.34	0.683	-65.786	2.435	0.797	q1_ao_14_e3_6_94_0001_26_0022_27_0010
-4278.6	0.98	-74.613	2.428	0.797	q1_ao_14_e3_7_10_0001_26_0016_28_0006
-4273.14	0.862	-69.096	2.586	0.797	q1_ao_14_e3_7_10_0001_26_0016_28_0009
-4271.86	0.71	-70.535	2.538	0.797	q1_ao_14_e3_7_10_0001_26_0016_28_0027
-4274.03	1.247	-67.76	2.373	0.797	q1_ao_14_e3_7_10_0001_26_0028_28_0029
-4277.01	0.947	-69.629	2.334	0.797	q1_ao_14_e3_8_13_0002_27_0024_29_0014
-4278.34	0.977	-68.733	2.308	0.797	q1_ao_14_e3_8_13_0002_27_0024_29_0015
-4275.51	0.946	-68.146	2.327	0.797	q1_ao_14_e3_8_13_0002_27_0024_29_0023
-4276.39	0.933	-71.171	2.458	0.797	q1_ao_14_e3_8_13_0002_27_0027_29_0022
-4277.82	0.903	-71.725	2.413	0.797	q1_ao_14_e3_8_13_0002_27_0037_29_0033
-4281.63	0.788	-73.647	2.343	0.797	q1_ao_14_e3_8_48_0001_28_0028_30_0009
-4269.08	0.796	-66.95	2.368	0.797	q1_ao_14_e3_9_50_0002_29_0001_31_0028
-4283.12	0.971	-74.327	2.367	0.797	q1_ao_14_e3_9_51_0002_29_0009_32_0010
-4280.51	1.02	-72.772	2.315	0.797	q1_ao_14_e3_9_51_0002_29_0009_32_0034
-4283.33	0.765	-72.937	2.535	0.797	q1_ao_14_e3_9_91_0002_29_0020_32_0016
-4282.41	0.904	-72.199	2.454	0.797	q1_ao_14_e3_9_91_0002_29_0020_32_0037
-4281.02	0.883	-72.725	2.377	0.797	q1_ao_15_e3_1_28_0001_30_0007_32_0014
-4280.51	0.831	-72.228	2.354	0.797	q1_ao_15_e3_1_28_0001_30_0007_32_0016
-4277.8	0.957	-70.878	2.347	0.797	q1_ao_15_e3_1_28_0001_30_0014_32_0015
-4283.71	0.845	-74.254	2.379	0.797	q1_ao_15_e3_1_28_0001_30_0014_32_0025
-4283.03	0.819	-73.13	2.368	0.797	q1_ao_15_e3_1_28_0001_30_0014_32_0031
-4280.87	0.921	-73.163	2.358	0.797	q1_ao_15_e3_1_28_0001_30_0020_32_0003
-4283.45	0.985	-74.36	2.326	0.797	q1_ao_15_e3_1_28_0001_30_0020_32_0014
-4282.78	0.783	-72.384	2.367	0.797	q1_ao_15_e3_1_28_0001_30_0020_32_0016
-4282.15	0.829	-70.968	2.327	0.797	q1_ao_15_e3_1_28_0001_30_0020_32_0034
-4281.82	0.65	-74.943	2.299	0.797	q1_ao_15_e3_1_97_0002_30_0027_33_0002
-4281.84	0.644	-75.081	2.305	0.797	q1_ao_15_e3_1_97_0002_30_0027_33_0034
-4266.65	0.682	-69.468	2.351	0.797	q1_ao_15_e3_9_12_0001_34_0002_34_0002
-4275.94	1.86	-69.466	2.243	0.797	q1_ao_15_e3_9_22_0002_34_0030_34_0012
-4241.12	2.378	-69.082	2.318	0.797	q1_ao_17_e3_1_86_0001_36_0004_35_0022
-4223.99	1.244	-65.047	2.392	0.797	q1_ao_17_e3_4_48_0001_37_0018_35_0032
-4260.23	0.994	-69.91	2.352	0.797	q1_ao_18_e3_6_33_0002_41_0005_37_0004
-4260.58	0.907	-70.244	2.412	0.797	q1_ao_18_e3_6_33_0002_41_0005_37_0006
-4257.33	1.06	-67.058	2.365	0.797	q1_ao_18_e3_6_33_0002_41_0005_37_0035
-4252.99	1.09	-69.722	2.412	0.797	q1_ao_18_e3_6_33_0002_41_0024_37_0032
-4258.62	0.964	-70.315	2.454	0.797	q1_ao_18_e3_6_33_0002_41_0024_37_0034
-4256.31	0.998	-68.18	2.457	0.797	q1_ao_18_e3_6_33_0002_41_0024_37_0039
-4258.52	1.07	-69.608	2.461	0.797	q1_ao_18_e3_6_33_0002_41_0028_37_0013
-4256.61	1.011	-68.956	2.466	0.797	q1_ao_18_e3_6_33_0002_41_0038_37_0003
-4258.05	0.973	-68.777	2.459	0.797	q1_ao_18_e3_6_33_0002_41_0038_37_0029
-4257.45	0.931	-68.697	2.465	0.797	q1_ao_18_e3_6_33_0002_41_0038_37_0032
-4254.86	1.035	-70.065	2.439	0.797	q1_ao_18_e3_6_33_0002_41_0038_37_0035
-4254.31	0.887	-69.28	2.464	0.797	q1_ao_18_e3_6_33_0002_41_0038_37_0039
-4253.88	0.951	-69.838	2.47	0.797	q1_ao_18_e3_6_33_0002_41_0040_37_0010
-4255.66	1.019	-69.162	2.457	0.797	q1_ao_18_e3_6_33_0002_41_0040_37_0020
-4254	0.994	-70.037	2.464	0.797	q1_ao_18_e3_6_33_0002_41_0040_37_0030
-4255.33	0.934	-69.724	2.458	0.797	q1_ao_18_e3_6_33_0002_41_0040_37_0035
-4247.73	0.647	-66.007	2.427	0.797	q1_ao_18_e3_7_29_0002_42_0001_38_0007
-4258.5	0.717	-68.688	2.448	0.797	q1_ao_18_e3_7_29_0002_42_0004_38_0030
-4246.12	0.591	-65.359	2.418	0.797	q1_ao_18_e3_7_29_0002_42_0005_38_0019
-4249.73	0.432	-66.666	2.412	0.797	q1_ao_18_e3_7_29_0002_42_0005_38_0033
-4256.54	0.623	-67.673	2.416	0.797	q1_ao_18_e3_7_29_0002_42_0017_38_0005
-4246.65	0.727	-65.692	2.368	0.797	q1_ao_18_e3_7_29_0002_42_0017_38_0026
-4249.47	0.829	-67.038	2.389	0.797	q1_ao_18_e3_7_29_0002_42_0017_38_0032
-4258.5	0.711	-64.907	2.41	0.797	q1_ao_18_e3_7_29_0002_42_0017_38_0034
-4257.66	0.709	-66.086	2.41	0.797	q1_ao_18_e3_7_29_0002_42_0017_38_0040
-4251.6	0.81	-70.854	2.31	0.797	q1_ao_18_e3_7_29_0002_42_0023_38_0030
-4243.51	0.785	-64.415	2.347	0.797	q1_ao_18_e3_7_29_0002_42_0028_38_0001
-4250.29	0.863	-66.967	2.329	0.797	q1_ao_18_e3_7_29_0002_42_0028_38_0011
-4262.89	0.877	-70.346	2.322	0.797	q1_ao_18_e3_7_29_0002_42_0028_38_0021
-4249.35	0.877	-66.725	2.309	0.797	q1_ao_18_e3_7_29_0002_42_0028_38_0033
-4244.59	1.022	-66.951	2.282	0.797	q1_ao_18_e3_7_29_0002_42_0028_38_0039
-4261.27	0.873	-70.668	2.36	0.797	q1_ao_18_e3_7_29_0002_42_0032_38_0002
-4260.4	0.949	-67.382	2.367	0.797	q1_ao_18_e3_7_29_0002_42_0032_38_0034
-4252.9	0.834	-70.894	2.323	0.797	q1_ao_18_e3_7_29_0002_42_0032_38_0035
-4258.74	0.86	-74.654	2.422	0.797	q1_ao_18_e3_8_68_0002_42_0001_38_0039
-4251.27	0.976	-65.821	2.411	0.797	q1_ao_18_e3_8_68_0002_42_0009_39_0013
-4248.73	0.884	-66.417	2.366	0.797	q1_ao_18_e3_8_68_0002_42_0031_39_0020
-4261.79	1.164	-68.486	2.317	0.797	q1_ao_18_e3_9_94_0002_43_0001_41_0034
-4258.54	0.735	-69.398	2.327	0.797	q1_ao_18_e3_9_94_0002_43_0032_42_0011
-4263.89	0.716	-73.932	2.467	0.797	q1_ao_19_e3_1_9_0001_43_0027_42_0003
-4259.89	0.81	-73.59	2.466	0.797	q1_ao_19_e3_1_9_0001_43_0027_42_0012
-4231.28	2.663	-60.995	2.453	0.797	q1_ao_1_e3_9_39_0002_48_0016_44_0013
-4290.47	0.637	-72.749	2.296	0.797	q1_ao_20_e3_1_89_0001_50_0039_46_0017
-4287.15	0.526	-72.513	2.42	0.797	q1_ao_20_e3_1_89_0001_50_0039_46_0030
-4287.74	0.525	-71.112	2.307	0.797	q1_ao_20_e3_1_89_0001_50_0039_46_0033
-4287.37	0.657	-71.958	2.288	0.797	q1_ao_20_e3_1_89_0001_50_0039_46_0035
-4290.05	0.61	-73.948	2.447	0.797	q1_ao_20_e3_2_82_0001_51_0016_47_0034
-4283.48	0.892	-72.526	2.279	0.797	q1_ao_20_e3_3_51_0001_52_0009_47_0004
-4287.67	0.875	-74.115	2.285	0.797	q1_ao_20_e3_3_51_0001_52_0009_47_0009
-4288.28	0.941	-74.18	2.285	0.797	q1_ao_20_e3_3_51_0001_52_0009_47_0015
-4283.42	0.928	-71.96	2.293	0.797	q1_ao_20_e3_3_51_0001_52_0009_47_0029
-4283.07	0.812	-72.404	2.406	0.797	q1_ao_20_e3_3_51_0001_52_0009_47_0031
-4284.12	1.015	-68.655	2.279	0.797	q1_ao_20_e3_3_58_0002_52_0017_48_0033
-4278.5	1.226	-66.664	2.324	0.797	q1_ao_20_e3_6_24_0001_55_0033_49_0013
-4288.17	0.919	-68.328	2.335	0.797	q1_ao_20_e3_6_24_0001_55_0034_49_0031
-4249.36	1.124	-69.069	2.363	0.797	q1_ao_10_e3_8_95_0002_4_0003_4_0012
-4249.41	1.344	-68.271	2.364	0.797	q1_ao_10_e3_8_95_0002_4_0003_4_0022
-4249.45	1.168	-69.899	2.365	0.797	q1_ao_10_e3_8_95_0002_4_0003_4_0025
-4249.73	1.187	-68.807	2.364	0.797	q1_ao_10_e3_8_95_0002_4_0003_4_0038
-4248.64	1.301	-70.342	2.322	0.797	q1_ao_10_e3_8_95_0002_4_0003_4_0040
-4236.73	1.211	-70.569	2.368	0.797	q1_ao_10_e3_8_95_0002_4_0022_4_0020
-4246.29	1.098	-71.261	2.383	0.797	q1_ao_10_e3_8_95_0002_4_0022_4_0037
-4236.78	1.172	-71.276	2.345	0.797	q1_ao_10_e3_8_95_0002_4_0028_4_0007
-4237.63	1.144	-69.9	2.292	0.797	q1_ao_10_e3_8_95_0002_4_0028_4_0022
-4250.19	1.108	-70.642	2.305	0.797	q1_ao_10_e3_8_95_0002_4_0028_4_0024
-4238.64	1.34	-69.512	2.334	0.797	q1_ao_10_e3_8_95_0002_4_0028_4_0028
-4239.91	1.398	-69.646	2.331	0.797	q1_ao_10_e3_8_95_0002_4_0028_4_0036
-4236.99	1.353	-67.914	2.291	0.797	q1_ao_10_e3_8_95_0002_4_0028_4_0038
-4238.89	1.225	-70.431	2.338	0.797	q1_ao_10_e3_8_95_0002_4_0028_4_0040
-4277.72	0.937	-67.402	2.292	0.797	q1_ao_20_e3_6_55_0001_55_0011_50_0005
-4281.35	0.841	-71.363	2.305	0.797	q1_ao_20_e3_6_55_0001_55_0011_50_0012
-4285.88	0.89	-71.319	2.329	0.797	q1_ao_20_e3_6_55_0001_55_0011_50_0014
-4283.96	0.89	-70.976	2.315	0.797	q1_ao_20_e3_6_55_0001_55_0011_50_0016
-4283.15	0.769	-71.293	2.33	0.797	q1_ao_20_e3_6_55_0001_55_0011_50_0025
-4281.1	1.104	-69.332	2.328	0.797	q1_ao_20_e3_6_55_0001_55_0011_50_0026
-4285.08	0.951	-70.839	2.331	0.797	q1_ao_20_e3_6_55_0001_55_0011_50_0030
-4282.5	0.653	-67.853	2.281	0.797	q1_ao_20_e3_6_6_0001_55_0009_50_0010
-4289.44	0.903	-71.552	2.395	0.797	q1_ao_20_e3_6_7_0001_56_0017_51_0009
-4277.56	0.944	-68.057	2.369	0.797	q1_ao_20_e3_6_7_0001_56_0032_51_0016
-4287.15	0.914	-72.815	2.368	0.797	q1_ao_20_e3_6_7_0001_56_0032_51_0017
-4287.49	0.929	-71.294	2.361	0.797	q1_ao_20_e3_6_7_0001_56_0032_51_0033
-4285.51	1.014	-69.953	2.306	0.797	q1_ao_20_e3_6_90_0001_56_0001_51_0008
-4289.6	1.016	-72.619	2.306	0.797	q1_ao_20_e3_6_90_0001_56_0001_51_0010
-4285.72	1.062	-68.772	2.305	0.797	q1_ao_20_e3_6_90_0001_56_0001_51_0017
-4286.7	1.009	-69.093	2.293	0.797	q1_ao_20_e3_6_90_0001_56_0001_51_0019
-4289.98	0.867	-70.368	2.384	0.797	q1_ao_20_e3_6_90_0001_56_0005_51_0001
-4284.7	0.875	-69.772	2.303	0.797	q1_ao_20_e3_6_90_0001_56_0005_51_0005
-4289.02	0.924	-69.986	2.32	0.797	q1_ao_20_e3_6_90_0001_56_0005_51_0015
-4287.7	0.898	-70.388	2.318	0.797	q1_ao_20_e3_6_90_0001_56_0005_51_0035
-4286.3	1.09	-69.505	2.321	0.797	q1_ao_20_e3_6_90_0001_56_0005_51_0037
-4284.56	0.964	-68.587	2.341	0.797	q1_ao_20_e3_6_90_0001_56_0010_51_0001
-4279.23	0.978	-68.934	2.341	0.797	q1_ao_20_e3_6_90_0001_56_0010_51_0028
-4285.79	1.039	-71.014	2.34	0.797	q1_ao_20_e3_6_90_0001_56_0032_52_0019
-4288	0.952	-69.229	2.328	0.797	q1_ao_20_e3_6_90_0001_56_0037_52_0001
-4283.68	1.027	-66.44	2.322	0.797	q1_ao_20_e3_6_90_0001_56_0037_52_0035
-4274.8	0.944	-71.125	2.402	0.797	q1_ao_20_e3_7_93_0001_57_0009_54_0013
-4278.81	0.82	-70.014	2.321	0.797	q1_ao_20_e3_7_93_0001_57_0009_54_0035
-4275.17	0.996	-69.758	2.398	0.797	q1_ao_20_e3_7_93_0001_57_0009_54_0039
-4281.57	0.921	-66.688	2.268	0.797	q1_ao_20_e3_7_93_0001_57_0019_54_0007
-4279.22	0.958	-67.88	2.353	0.797	q1_ao_20_e3_7_93_0001_57_0019_54_0014
-4285.89	0.619	-66.975	2.495	0.797	q1_ao_20_e3_7_93_0001_57_0034_54_0014
-4286.01	0.648	-67.015	2.479	0.797	q1_ao_20_e3_7_93_0001_57_0034_54_0022
-4280.51	0.523	-70.34	2.396	0.797	q1_ao_20_e3_7_93_0001_57_0034_54_0026
-4281.15	0.901	-70.32	2.376	0.797	q1_ao_20_e3_7_93_0001_57_0036_54_0001
-4282.61	1.051	-70.336	2.42	0.797	q1_ao_20_e3_7_93_0001_57_0036_54_0005
-4279.08	1.226	-66.855	2.398	0.797	q1_ao_20_e3_7_93_0001_57_0036_54_0011
-4279.99	1.066	-70.77	2.386	0.797	q1_ao_20_e3_7_93_0001_57_0036_54_0039
-4284.96	0.607	-68.164	2.362	0.797	q1_ao_20_e3_8_10_0001_58_0010_54_0021
-4287.35	0.962	-68.749	2.412	0.797	q1_ao_20_e3_8_10_0001_58_0014_55_0010
-4285.49	0.76	-67.327	2.434	0.797	q1_ao_20_e3_8_10_0001_58_0014_55_0016
-4288.15	0.865	-70.03	2.427	0.797	q1_ao_20_e3_8_10_0001_58_0014_55_0026
-4287.36	0.904	-67.07	2.385	0.797	q1_ao_20_e3_8_29_0002_58_0028_55_0028
-4280.07	0.786	-71.136	2.474	0.797	q1_ao_20_e3_9_27_0001_58_0017_56_0034
-4291.32	0.953	-74.56	2.497	0.797	q1_ao_2_e3_4_36_0002_61_0033_57_0001
-4292.38	0.936	-73.975	2.508	0.797	q1_ao_2_e3_4_36_0002_61_0033_57_0029
-4294.36	0.531	-74.004	2.487	0.797	q1_ao_2_e3_6_37_0002_62_0019_57_0015
-4290.18	0.49	-73.583	2.453	0.797	q1_ao_2_e3_6_37_0002_62_0019_57_0017
-4291.34	1.273	-77.853	2.561	0.797	q1_ao_2_e3_6_37_0002_62_0030_57_0003
-4292.76	1.217	-74.794	2.51	0.797	q1_ao_2_e3_6_37_0002_62_0030_57_0005
-4289.55	1.268	-73.903	2.544	0.797	q1_ao_2_e3_6_37_0002_62_0030_57_0015
-4292.88	1.35	-76.62	2.583	0.797	q1_ao_2_e3_6_37_0002_62_0030_57_0026
-4291.94	1.316	-78.939	2.51	0.797	q1_ao_2_e3_6_37_0002_62_0030_57_0029
-4289.05	1.325	-75.251	2.516	0.797	q1_ao_2_e3_6_37_0002_62_0030_57_0039
-4289.96	1.094	-67.218	2.345	0.797	q1_ao_2_e3_6_59_0001_62_0012_57_0001
-4286.17	1.058	-71.757	2.337	0.797	q1_ao_2_e3_6_59_0001_62_0012_57_0002
-4290.69	0.966	-67.018	2.335	0.797	q1_ao_2_e3_6_59_0001_62_0012_57_0004
-4291.81	0.943	-69.858	2.34	0.797	q1_ao_2_e3_6_59_0001_62_0012_57_0022
-4290.03	1.058	-70.042	2.318	0.797	q1_ao_2_e3_6_59_0001_62_0023_58_0001
-4288.36	1.008	-69.869	2.324	0.797	q1_ao_2_e3_6_59_0001_62_0023_58_0034
-4284.6	1.022	-68.455	2.334	0.797	q1_ao_2_e3_6_59_0001_62_0034_58_0014
-4282.64	1.208	-67.417	2.342	0.797	q1_ao_2_e3_6_59_0001_62_0034_58_0020
-4282.11	1.002	-67.196	2.31	0.797	q1_ao_2_e3_6_59_0001_62_0034_58_0021
-4289.2	1.016	-70.653	2.297	0.797	q1_ao_2_e3_6_59_0001_62_0034_58_0034
-4286.89	0.936	-68.48	2.475	0.797	q1_ao_3_e3_1_21_0001_64_0003_59_0012
-4289.47	0.846	-72.692	2.504	0.797	q1_ao_3_e3_1_21_0001_64_0011_59_0016
-4296.48	0.851	-73.922	2.425	0.797	q1_ao_3_e3_1_21_0001_64_0020_59_0020
-4296.09	0.753	-69.693	2.457	0.797	q1_ao_3_e3_1_21_0001_64_0036_59_0007
-4299.68	0.803	-70.84	2.358	0.797	q1_ao_3_e3_2_15_0001_64_0001_59_0002
-4298.31	0.785	-70.905	2.329	0.797	q1_ao_3_e3_2_15_0001_64_0001_59_0005
-4298.11	0.861	-70.169	2.301	0.797	q1_ao_3_e3_2_15_0001_64_0001_59_0032
-4304.41	0.785	-70.148	2.322	0.797	q1_ao_3_e3_2_15_0001_64_0001_59_0037
-4300.63	0.693	-68.211	2.392	0.797	q1_ao_3_e3_2_15_0001_64_0006_59_0023
-4246.38	1.778	-61.907	2.376	0.797	q1_ao_10_e3_9_84_0001_4_0002_5_0035
-4299.95	0.586	-74.071	2.371	0.797	q1_ao_3_e3_2_15_0001_64_0013_60_0009
-4300.73	1.026	-68.177	2.354	0.797	q1_ao_3_e3_2_15_0001_64_0020_60_0023
-4298.66	0.863	-72.118	2.362	0.797	q1_ao_3_e3_2_15_0001_64_0029_60_0007
-4297.07	0.708	-71.535	2.377	0.797	q1_ao_3_e3_2_15_0001_64_0029_60_0015
-4292.61	0.938	-67.699	2.318	0.797	q1_ao_3_e3_2_15_0001_64_0034_60_0002
-4304.61	0.799	-68.946	2.334	0.797	q1_ao_3_e3_2_15_0001_64_0034_60_0011
-4305.82	0.789	-71.519	2.328	0.797	q1_ao_3_e3_2_15_0001_64_0034_60_0021
-4290.37	0.954	-72.404	2.356	0.797	q1_ao_3_e3_2_15_0001_64_0035_60_0005
-4297.12	0.882	-71.313	2.404	0.797	q1_ao_3_e3_2_15_0001_64_0035_60_0010
-4296.72	1.07	-71.899	2.336	0.797	q1_ao_3_e3_2_15_0001_64_0035_60_0020
-4299.82	0.85	-74.466	2.362	0.797	q1_ao_3_e3_2_15_0001_64_0035_60_0034
-4298.01	0.866	-71.169	2.373	0.797	q1_ao_3_e3_2_15_0001_64_0035_60_0037
-4296.34	0.773	-74.049	2.406	0.797	q1_ao_3_e3_2_15_0001_64_0037_60_0004
-4295.38	0.784	-74.127	2.389	0.797	q1_ao_3_e3_2_15_0001_64_0037_60_0019
-4294.3	0.805	-73.812	2.382	0.797	q1_ao_3_e3_2_15_0001_64_0037_60_0034
-4293.94	0.727	-73.349	2.354	0.797	q1_ao_3_e3_2_15_0001_64_0037_60_0039
-4297.78	0.723	-71.355	2.394	0.797	q1_ao_3_e3_2_15_0001_64_0038_60_0001
-4294.32	0.901	-69.659	2.354	0.797	q1_ao_3_e3_2_15_0001_64_0038_60_0010
-4300.17	0.8	-73.26	2.367	0.797	q1_ao_3_e3_2_15_0001_64_0038_60_0027
-4292.63	0.618	-69.276	2.478	0.797	q1_ao_3_e3_2_8_0001_65_0025_60_0021
-4289.62	0.954	-67.477	2.377	0.797	q1_ao_3_e3_2_8_0001_65_0025_60_0022
-4293.66	0.693	-69.785	2.487	0.797	q1_ao_3_e3_2_8_0001_65_0025_60_0025
-4289.12	1.124	-71.201	2.324	0.797	q1_ao_3_e3_4_5_0001_65_0031_61_0009
-4294.5	1.033	-71.416	2.327	0.797	q1_ao_3_e3_4_5_0001_65_0031_61_0013
-4292.06	1.028	-69.66	2.379	0.797	q1_ao_3_e3_4_86_0002_66_0002_61_0026
-4290.86	0.893	-69.019	2.366	0.797	q1_ao_3_e3_4_86_0002_66_0002_61_0027
-4295.33	1.003	-75.322	2.394	0.797	q1_ao_3_e3_6_5_0001_67_0001_61_0012
-4293.12	0.809	-71.99	2.393	0.797	q1_ao_3_e3_6_5_0001_67_0001_61_0023
-4291.51	0.944	-69.991	2.412	0.797	q1_ao_3_e3_6_5_0001_67_0001_61_0025
-4296.67	0.846	-74.738	2.366	0.797	q1_ao_3_e3_6_5_0001_67_0001_61_0026
-4294.06	0.767	-70.606	2.384	0.797	q1_ao_3_e3_6_5_0001_67_0001_61_0033
-4294.96	0.852	-73.275	2.367	0.797	q1_ao_3_e3_6_5_0001_67_0001_61_0035
-4296.58	0.788	-72.639	2.377	0.797	q1_ao_3_e3_6_5_0001_67_0001_61_0037
-4302.63	1.039	-74.147	2.347	0.797	q1_ao_3_e3_6_5_0001_67_0022_62_0002
-4301.19	1.226	-71.923	2.332	0.797	q1_ao_3_e3_6_5_0001_67_0022_62_0003
-4303.03	0.957	-74.092	2.332	0.797	q1_ao_3_e3_6_5_0001_67_0022_62_0026
-4297.18	0.572	-73.856	2.486	0.797	q1_ao_3_e3_6_5_0001_67_0040_62_0016
-4293.64	0.531	-72.448	2.511	0.797	q1_ao_3_e3_6_5_0001_67_0040_62_0027
-4303.35	0.645	-71.654	2.471	0.797	q1_ao_3_e3_6_5_0001_67_0040_62_0038
-4299.22	0.54	-70.917	2.429	0.797	q1_ao_3_e3_6_5_0001_67_0040_62_0040
-4295.71	1.153	-74.096	2.448	0.797	q1_ao_3_e3_7_26_0001_68_0006_62_0010
-4303.48	0.961	-73.051	2.418	0.797	q1_ao_3_e3_7_26_0001_68_0006_62_0015
-4305.25	0.979	-75.101	2.419	0.797	q1_ao_3_e3_7_26_0001_68_0006_62_0022
-4307.03	1.01	-76.409	2.361	0.797	q1_ao_3_e3_7_26_0001_68_0006_62_0035
-4289.81	1.501	-64.59	2.415	0.797	q1_ao_3_e3_7_37_0002_68_0039_62_0007
-4288.44	1.204	-65.741	2.348	0.797	q1_ao_3_e3_7_37_0002_68_0039_62_0031
-4300.24	0.915	-69.579	2.278	0.797	q1_ao_3_e3_7_5_0001_68_0017_62_0005
-4300.07	0.879	-69.094	2.339	0.797	q1_ao_3_e3_7_5_0001_68_0017_62_0022
-4295.97	0.912	-68.596	2.291	0.797	q1_ao_3_e3_7_5_0001_68_0017_62_0030
-4293.26	0.74	-68.347	2.332	0.797	q1_ao_3_e3_7_5_0001_68_0017_62_0031
-4297.55	0.958	-73.997	2.282	0.797	q1_ao_3_e3_7_5_0001_68_0017_62_0032
-4301.6	0.868	-71.88	2.33	0.797	q1_ao_3_e3_7_5_0001_68_0017_62_0035
-4292.05	0.846	-69.811	2.406	0.797	q1_ao_3_e3_8_21_0001_69_0003_62_0006
-4295.06	0.992	-73.888	2.442	0.797	q1_ao_3_e3_8_21_0001_69_0014_62_0002
-4291.18	1.806	-64.891	2.47	0.797	q1_ao_3_e3_8_21_0001_69_0014_62_0016
-4294.13	0.848	-70.533	2.379	0.797	q1_ao_3_e3_8_21_0001_69_0014_62_0018
-4296.04	0.722	-72.557	2.337	0.797	q1_ao_3_e3_8_21_0001_69_0014_62_0023
-4295.8	0.69	-71.119	2.464	0.797	q1_ao_3_e3_8_21_0001_69_0023_63_0021
-4298.04	0.604	-71.442	2.437	0.797	q1_ao_3_e3_8_21_0001_69_0027_63_0016
-4293.53	0.862	-67.791	2.5	0.797	q1_ao_3_e3_8_21_0001_69_0027_63_0027
-4289.37	0.993	-66.792	2.4	0.797	q1_ao_3_e3_8_21_0001_69_0034_63_0022
-4287.46	0.759	-68.147	2.491	0.797	q1_ao_3_e3_8_21_0001_69_0040_63_0006
-4288.94	1.656	-68.605	2.253	0.797	q1_ao_3_e3_8_21_0001_69_0040_63_0032
-4290.92	1.006	-68.338	2.388	0.797	q1_ao_3_e3_8_21_0001_69_0040_63_0038
-4295.56	0.797	-70.205	2.461	0.797	q1_ao_3_e3_8_21_0001_69_0040_63_0039
-4296.15	0.848	-71.38	2.404	0.797	q1_ao_3_e3_8_61_0002_69_0014_64_0006
-4295.63	0.905	-68.472	2.448	0.797	q1_ao_3_e3_8_61_0002_69_0014_64_0011
-4292.97	1.037	-68.815	2.439	0.797	q1_ao_3_e3_8_61_0002_69_0018_64_0007
-4293.47	0.883	-69.236	2.396	0.797	q1_ao_3_e3_8_61_0002_69_0018_64_0017
-4292.21	0.967	-71.72	2.435	0.797	q1_ao_3_e3_8_61_0002_69_0018_64_0032
[truncated: 156,653 more rows]
