# Supplementary material for: Allosteric mechanism for KCNE1 modulation of KCNQ1 potassium channel activation
Source: eLife. 2020 Oct 23;9:e57680. doi: 10.7554/eLife.57680 (PMC7584456; doi:10.7554/eLife.57680)
Supplement: Figure 3—figure supplement 4—source data 3. [file elife-57680-fig3-figsupp4-data3.xlsx]

## Sheet: Sheet1
Rosetta fullatom score	Atom pair restraint score	Rosetta ddg binding score	Interface RMSD vs Q1E3 cryoEM model	Fraction same contacts as Q1E3 cryoEM model	Model description
-4718.28	1.846	-50.783	4.21	0.582	q1_ao_1_e3_6_15_0001_66_0008_73_0033_73_0023
-4719.35	1.917	-49.883	4.222	0.582	q1_ao_1_e3_6_15_0001_66_0020_73_0032_74_0026
-4720.53	3.021	-54.142	4.207	0.582	q1_ao_1_e3_6_29_0033_68_0008_75_0023_77_0026
-4726.23	2.05	-62.054	4.216	0.582	q1_ao_1_e3_7_77_0038_82_0028_92_0038_94_0029
-4705.99	2.862	-38.618	4.254	0.57	q1_ao_1_e3_1_58_0023_20_0030
-4722.37	2.04	-53.973	4.2	0.57	q1_ao_1_e3_7_77_0038_82_0028
-4720.82	1.963	-47.735	4.181	0.57	q1_ao_1_e3_6_15_0001_66_0003_73_0009
-4717.28	2.12	-48.277	4.229	0.57	q1_ao_1_e3_6_15_0001_66_0008_73_0006
-4718.87	1.944	-50.1	4.21	0.57	q1_ao_1_e3_6_15_0001_66_0008_73_0033
-4719.68	2.034	-52.298	4.22	0.57	q1_ao_1_e3_6_15_0001_66_0020_73_0016
-4717.03	1.967	-52.129	4.219	0.57	q1_ao_1_e3_6_15_0001_66_0033_73_0005
-4720.61	1.847	-49.763	4.202	0.57	q1_ao_1_e3_6_15_0001_66_0033_73_0008
-4724.65	1.991	-57.096	4.242	0.57	q1_ao_1_e3_6_38_0024_69_0018_79_0015
-4723.73	1.826	-56.972	4.225	0.57	q1_ao_1_e3_6_38_0024_69_0018_79_0022
-4717.25	1.715	-54.195	4.343	0.57	q1_ao_1_e3_6_40_0012_69_0017_80_0024
-4719.61	1.751	-54.196	4.358	0.57	q1_ao_1_e3_6_40_0012_69_0017_80_0035
-4735.36	1.566	-64.293	4.21	0.57	q1_ao_1_e3_7_77_0038_82_0028_92_0003
-4727.62	1.963	-62.61	4.209	0.57	q1_ao_1_e3_7_77_0038_82_0028_92_0038
-4721.28	2.125	-54.465	4.32	0.57	q1_ao_1_e3_2_14_0005_26_0001_32_0005_25_0003
-4725.74	2.338	-57.086	4.309	0.57	q1_ao_1_e3_2_14_0005_26_0001_32_0005_25_0021
-4723.41	2.645	-58.474	4.331	0.57	q1_ao_1_e3_2_14_0005_26_0001_32_0005_25_0024
-4724.36	2.106	-57.972	4.24	0.57	q1_ao_1_e3_2_14_0005_26_0006_32_0021_25_0036
-4728.16	1.56	-58.328	4.21	0.57	q1_ao_1_e3_2_14_0005_26_0011_32_0031_26_0013
-4718.64	2.17	-54.215	4.224	0.57	q1_ao_1_e3_3_26_0040_38_0035_43_0003_40_0004
-4722.13	3.539	-52.642	4.242	0.57	q1_ao_1_e3_3_59_0021_41_0020_47_0023_43_0015
-4717.96	3.847	-50.543	4.23	0.57	q1_ao_1_e3_3_59_0021_41_0020_47_0028_43_0005
-4714.64	2.27	-48.109	4.268	0.57	q1_ao_1_e3_3_93_0040_46_0040_55_0038_54_0007
-4726.43	1.545	-61.763	4.223	0.57	q1_ao_1_e3_5_80_0023_64_0008_68_0014_69_0004
-4720.55	1.913	-51.164	4.212	0.57	q1_ao_1_e3_6_15_0001_66_0008_73_0030_73_0034
-4720.1	1.921	-52.572	4.22	0.57	q1_ao_1_e3_6_15_0001_66_0008_73_0030_73_0039
-4720.57	1.876	-50.538	4.212	0.57	q1_ao_1_e3_6_15_0001_66_0008_73_0031_73_0008
-4716.45	1.995	-49.261	4.208	0.57	q1_ao_1_e3_6_15_0001_66_0008_73_0031_73_0032
-4721.11	1.898	-50.618	4.203	0.57	q1_ao_1_e3_6_15_0001_66_0008_73_0031_73_0038
-4718.39	1.796	-50.426	4.204	0.57	q1_ao_1_e3_6_15_0001_66_0008_73_0033_73_0012
-4721.81	2.106	-49.837	4.195	0.57	q1_ao_1_e3_6_15_0001_66_0020_73_0004_73_0011
-4720.21	2.063	-50.305	4.214	0.57	q1_ao_1_e3_6_15_0001_66_0020_73_0010_73_0007
-4717.95	2.051	-50.239	4.231	0.57	q1_ao_1_e3_6_15_0001_66_0020_73_0010_73_0011
-4718.77	1.909	-52.882	4.21	0.57	q1_ao_1_e3_6_15_0001_66_0020_73_0010_73_0013
-4718.53	1.937	-52.438	4.224	0.57	q1_ao_1_e3_6_15_0001_66_0020_73_0010_73_0020
-4720.08	1.952	-49.919	4.223	0.57	q1_ao_1_e3_6_15_0001_66_0020_73_0015_73_0015
-4719.77	1.926	-50.382	4.209	0.57	q1_ao_1_e3_6_15_0001_66_0020_73_0024_74_0032
-4716.91	2.029	-49.046	4.217	0.57	q1_ao_1_e3_6_15_0001_66_0020_73_0027_74_0001
-4719.57	2.022	-50.828	4.236	0.57	q1_ao_1_e3_6_15_0001_66_0020_73_0032_74_0012
-4719.46	1.926	-50.677	4.204	0.57	q1_ao_1_e3_6_15_0001_66_0033_73_0012_74_0023
-4728.31	1.07	-63.237	4.197	0.57	q1_ao_1_e3_6_28_0008_67_0006_74_0010_74_0001
-4725.89	1.167	-61.675	4.171	0.57	q1_ao_1_e3_6_28_0008_67_0006_74_0010_74_0026
-4723.85	1.251	-59.638	4.219	0.57	q1_ao_1_e3_6_28_0008_67_0006_74_0014_75_0006
-4718.54	2.898	-52.48	4.202	0.57	q1_ao_1_e3_6_29_0033_68_0008_75_0012_77_0008
-4720.35	3.064	-51.823	4.198	0.57	q1_ao_1_e3_6_29_0033_68_0008_75_0026_77_0035
-4718.52	2.789	-52.208	4.208	0.57	q1_ao_1_e3_6_29_0033_68_0008_75_0028_77_0003
-4717.65	2.821	-51.773	4.215	0.57	q1_ao_1_e3_6_29_0033_68_0008_75_0028_77_0019
-4726.33	1.667	-61.433	4.361	0.57	q1_ao_1_e3_10_45_0035_5_0028_9_0027_7_0040
-4722.06	1.999	-55.135	4.216	0.57	q1_ao_1_e3_6_38_0024_69_0018_79_0012_81_0013
-4725.1	2.014	-58.439	4.235	0.57	q1_ao_1_e3_6_38_0024_69_0018_79_0012_81_0031
-4723.9	2.043	-55.217	4.225	0.57	q1_ao_1_e3_6_38_0024_69_0018_79_0012_81_0035
-4722.44	1.961	-54.825	4.213	0.57	q1_ao_1_e3_6_38_0024_69_0018_79_0012_81_0037
-4723.97	1.712	-59.41	4.232	0.57	q1_ao_1_e3_6_38_0024_69_0018_79_0015_81_0004
-4720.86	1.711	-58.758	4.241	0.57	q1_ao_1_e3_6_38_0024_69_0018_79_0015_81_0010
-4725.84	2.044	-57.505	4.224	0.57	q1_ao_1_e3_6_38_0024_69_0018_79_0015_81_0012
-4731.11	1.496	-62.93	4.213	0.57	q1_ao_1_e3_6_38_0024_69_0018_79_0015_81_0018
-4729.79	2	-61.37	4.225	0.57	q1_ao_1_e3_6_38_0024_69_0018_79_0015_81_0029
-4727.39	1.766	-61.333	4.208	0.57	q1_ao_1_e3_6_38_0024_69_0018_79_0015_81_0030
-4729.44	2.02	-61.221	4.227	0.57	q1_ao_1_e3_6_38_0024_69_0018_79_0015_81_0031
-4721.27	1.653	-55.106	4.219	0.57	q1_ao_1_e3_6_38_0024_69_0018_79_0015_81_0034
-4721.61	1.938	-56.435	4.241	0.57	q1_ao_1_e3_6_38_0024_69_0018_79_0015_81_0038
-4724.4	2.026	-55.548	4.212	0.57	q1_ao_1_e3_6_38_0024_69_0018_79_0023_81_0006
-4728.17	1.686	-59.291	4.214	0.57	q1_ao_1_e3_6_38_0024_69_0018_79_0023_81_0020
-4725.2	1.827	-57.444	4.217	0.57	q1_ao_1_e3_6_38_0024_69_0018_79_0023_81_0028
-4729.63	1.958	-60.328	4.205	0.57	q1_ao_1_e3_6_38_0024_69_0018_79_0023_81_0033
-4717.86	1.69	-56.689	4.377	0.57	q1_ao_1_e3_6_40_0012_69_0017_80_0001_82_0008
-4716.65	1.771	-53.068	4.371	0.57	q1_ao_1_e3_6_40_0012_69_0017_80_0001_82_0037
-4717.28	1.714	-53.728	4.36	0.57	q1_ao_1_e3_6_40_0012_69_0017_80_0009_82_0012
-4716.46	1.722	-53.14	4.361	0.57	q1_ao_1_e3_6_40_0012_69_0017_80_0009_82_0034
-4718.5	1.885	-54.008	4.361	0.57	q1_ao_1_e3_6_40_0012_69_0017_80_0009_82_0037
-4714.92	1.686	-53.542	4.364	0.57	q1_ao_1_e3_6_40_0012_69_0017_80_0021_82_0018
-4717.39	1.745	-53.777	4.365	0.57	q1_ao_1_e3_6_40_0012_69_0017_80_0021_82_0023
-4717.1	1.734	-54.283	4.357	0.57	q1_ao_1_e3_6_40_0012_69_0017_80_0021_82_0025
-4719.87	1.691	-55.684	4.342	0.57	q1_ao_1_e3_6_40_0012_69_0017_80_0024_82_0007
-4717.32	1.871	-53.806	4.36	0.57	q1_ao_1_e3_6_40_0012_69_0017_80_0035_83_0016
-4720.43	2.822	-59.944	4.236	0.57	q1_ao_1_e3_6_80_0007_74_0032_86_0004_88_0010
-4719.43	2.891	-59.201	4.25	0.57	q1_ao_1_e3_6_80_0007_74_0032_86_0004_88_0020
-4720.68	2.882	-59.975	4.242	0.57	q1_ao_1_e3_6_80_0007_74_0032_86_0004_88_0023
-4734.94	1.5	-66.605	4.203	0.57	q1_ao_1_e3_7_77_0038_82_0028_92_0003_94_0016
-4725.12	1.934	-62.981	4.199	0.57	q1_ao_1_e3_7_77_0038_82_0028_92_0038_94_0033
-4726.35	2.072	-58.084	4.246	0.57	q1_ao_1_e3_8_2_0023_85_0015_94_0020_96_0017
-4726.28	3.112	-55.723	4.268	0.557	q1_ao_1_e3_10_21_0030_2_0005
-4724.03	3.008	-51.205	4.27	0.557	q1_ao_1_e3_3_59_0021_41_0020
-4719.64	2.428	-46.423	4.223	0.557	q1_ao_1_e3_6_15_0001_66_0008
-4714.91	2.429	-46.95	4.215	0.557	q1_ao_1_e3_6_15_0001_66_0020
-4719.15	2.272	-46.91	4.205	0.557	q1_ao_1_e3_6_15_0001_66_0033
-4725.85	2.782	-54.738	4.233	0.557	q1_ao_1_e3_6_38_0024_69_0018
-4717.87	2.124	-48.249	4.339	0.557	q1_ao_1_e3_6_40_0012_69_0017
-4724.25	3.488	-49.392	4.266	0.557	q1_ao_1_e3_10_7_0006_9_0017_15_0005
-4725.62	3.482	-49.896	4.265	0.557	q1_ao_1_e3_10_7_0006_9_0017_15_0015
-4722	2.248	-53.991	4.229	0.557	q1_ao_1_e3_2_14_0005_26_0011_32_0031
-4724.38	3.125	-50.643	4.257	0.557	q1_ao_1_e3_3_59_0021_41_0020_47_0017
-4719.81	2.042	-50.866	4.22	0.557	q1_ao_1_e3_6_15_0001_66_0008_73_0030
-4722.87	2.089	-51.591	4.205	0.557	q1_ao_1_e3_6_15_0001_66_0008_73_0031
-4721.69	2.089	-50.071	4.211	0.557	q1_ao_1_e3_6_15_0001_66_0020_73_0004
-4721.29	2.1	-49.997	4.22	0.557	q1_ao_1_e3_6_15_0001_66_0020_73_0015
-4720.27	2.093	-49.997	4.223	0.557	q1_ao_1_e3_6_15_0001_66_0020_73_0032
-4722.86	2.2	-50.163	4.197	0.557	q1_ao_1_e3_6_15_0001_66_0033_73_0012
-4718.38	2.114	-49.268	4.216	0.557	q1_ao_1_e3_6_15_0001_66_0033_73_0031
-4722.51	1.274	-58.712	4.227	0.557	q1_ao_1_e3_6_28_0008_67_0006_74_0008
-4723.62	1.361	-57.844	4.221	0.557	q1_ao_1_e3_6_28_0008_67_0006_74_0014
-4723.72	1.243	-59.287	4.223	0.557	q1_ao_1_e3_6_28_0008_67_0006_74_0018
-4720.33	2.964	-49.637	4.19	0.557	q1_ao_1_e3_6_29_0033_68_0008_75_0002
-4717.23	2.861	-50.441	4.196	0.557	q1_ao_1_e3_6_29_0033_68_0008_75_0012
-4717.33	2.875	-51.863	4.196	0.557	q1_ao_1_e3_6_29_0033_68_0008_75_0026
-4717.39	2.801	-50.354	4.197	0.557	q1_ao_1_e3_6_29_0033_68_0008_75_0028
-4713.39	2.682	-49.491	4.217	0.557	q1_ao_1_e3_6_29_0033_68_0008_75_0031
-4719.64	2.254	-54.357	4.245	0.557	q1_ao_1_e3_6_38_0024_69_0018_79_0012
-4724.1	2.094	-55.454	4.23	0.557	q1_ao_1_e3_6_38_0024_69_0018_79_0023
-4728.91	1.422	-61.282	4.21	0.557	q1_ao_1_e3_6_38_0024_69_0018_79_0036
-4718.02	1.701	-51.749	4.344	0.557	q1_ao_1_e3_6_40_0012_69_0017_80_0009
-4713.86	1.841	-50.371	4.364	0.557	q1_ao_1_e3_6_40_0012_69_0017_80_0021
-4717.48	1.838	-54.649	4.335	0.557	q1_ao_1_e3_6_40_0012_69_0017_80_0027
-4728.22	1.611	-63.995	4.219	0.557	q1_ao_1_e3_7_77_0038_82_0028_92_0017
-4731.9	1.481	-63.499	4.217	0.557	q1_ao_1_e3_7_77_0038_82_0028_92_0019
-4717.59	2.942	-48.274	4.246	0.557	q1_ao_1_e3_7_81_0018_82_0011_93_0017
-4718.48	3.847	-42.67	4.332	0.557	q1_ao_1_e3_8_23_0008_86_0026_95_0027
-4710.66	2.398	-42.467	4.295	0.557	q1_ao_1_e3_1_28_0031_16_0016_24_0016_21_0008
-4726.13	1.909	-58.745	4.212	0.557	q1_ao_1_e3_2_14_0005_26_0004_32_0004_25_0010
-4722.61	1.981	-54.98	4.222	0.557	q1_ao_1_e3_2_14_0005_26_0004_32_0004_25_0016
-4722.98	1.833	-58.402	4.252	0.557	q1_ao_1_e3_2_14_0005_26_0004_32_0004_25_0027
-4725.02	1.921	-57.454	4.219	0.557	q1_ao_1_e3_2_14_0005_26_0004_32_0004_25_0032
-4726.34	2.043	-56.869	4.228	0.557	q1_ao_1_e3_2_14_0005_26_0004_32_0004_25_0039
-4719.66	2.179	-58.999	4.254	0.557	q1_ao_1_e3_2_14_0005_26_0006_32_0021_25_0007
-4723.75	2.1	-58.557	4.241	0.557	q1_ao_1_e3_2_14_0005_26_0006_32_0021_25_0014
-4725.25	2.069	-58.698	4.236	0.557	q1_ao_1_e3_2_14_0005_26_0006_32_0021_25_0020
-4720.92	2.109	-57.397	4.245	0.557	q1_ao_1_e3_2_14_0005_26_0006_32_0021_25_0021
-4725.12	2.092	-58.116	4.241	0.557	q1_ao_1_e3_2_14_0005_26_0006_32_0021_25_0031
-4725.34	1.981	-58.707	4.231	0.557	q1_ao_1_e3_2_14_0005_26_0011_32_0031_26_0002
-4725.66	2.16	-57.29	4.227	0.557	q1_ao_1_e3_2_14_0005_26_0011_32_0031_26_0015
-4721.76	2.138	-53.372	4.301	0.557	q1_ao_1_e3_2_14_0005_26_0029_33_0026_26_0014
-4727.68	2.922	-57.552	4.216	0.557	q1_ao_1_e3_2_16_0007_26_0002_33_0021_26_0008
-4717.56	1.679	-53.884	4.299	0.557	q1_ao_1_e3_2_50_0033_31_0017_36_0032_30_0009
-4718.37	1.883	-56.914	4.318	0.557	q1_ao_1_e3_2_50_0033_31_0017_36_0032_30_0012
-4719.02	1.896	-56.014	4.32	0.557	q1_ao_1_e3_2_50_0033_31_0017_36_0032_30_0024
-4715.79	2.388	-47.211	4.295	0.557	q1_ao_1_e3_2_50_0036_31_0001_36_0001_31_0010
-4715.28	2.529	-47.985	4.293	0.557	q1_ao_1_e3_2_50_0036_31_0001_36_0001_31_0023
-4720.21	2.249	-49.221	4.298	0.557	q1_ao_1_e3_2_50_0036_31_0001_36_0001_31_0025
-4713.96	2.448	-47.753	4.303	0.557	q1_ao_1_e3_2_50_0036_31_0016_37_0029_33_0017
-4720.04	2.447	-52.85	4.311	0.557	q1_ao_1_e3_2_50_0036_31_0024_37_0032_34_0010
-4717.8	2.22	-51.124	4.302	0.557	q1_ao_1_e3_2_50_0036_31_0024_37_0032_34_0018
-4720.82	3.611	-51.99	4.272	0.557	q1_ao_1_e3_3_59_0021_41_0020_47_0013_43_0002
-4721.06	3.615	-52.263	4.274	0.557	q1_ao_1_e3_3_59_0021_41_0020_47_0013_43_0039
-4717.48	3.894	-49.975	4.261	0.557	q1_ao_1_e3_3_59_0021_41_0020_47_0017_43_0007
-4721.57	3.618	-52.394	4.251	0.557	q1_ao_1_e3_3_59_0021_41_0020_47_0023_43_0026
-4718.92	2.142	-53.727	4.221	0.557	q1_ao_1_e3_3_84_0017_45_0032_53_0014_49_0023
-4717.46	2.285	-53.204	4.295	0.557	q1_ao_1_e3_3_93_0040_46_0028_55_0031_54_0020
-4718.33	2.667	-44.66	4.305	0.557	q1_ao_1_e3_3_93_0040_46_0028_55_0031_54_0040
-4719.5	2.632	-50.117	4.244	0.557	q1_ao_1_e3_3_93_0040_46_0038_55_0018_54_0037
-4719.53	4.257	-52.471	4.289	0.557	q1_ao_1_e3_4_92_0039_55_0008_61_0015_64_0006
-4721.7	2.463	-53.953	4.329	0.557	q1_ao_1_e3_5_2_0019_58_0009_62_0028_65_0003
-4728.66	2.501	-56.116	4.321	0.557	q1_ao_1_e3_5_2_0019_58_0009_62_0028_65_0009
-4722.23	2.509	-53.96	4.32	0.557	q1_ao_1_e3_5_2_0019_58_0009_62_0028_65_0016
-4723.05	2.465	-53.678	4.319	0.557	q1_ao_1_e3_5_2_0019_58_0009_62_0028_65_0020
-4722.51	2.484	-55.833	4.321	0.557	q1_ao_1_e3_5_2_0019_58_0009_62_0028_65_0026
-4731.03	1.373	-64.1	4.223	0.557	q1_ao_1_e3_5_80_0023_64_0008_68_0014_69_0029
-4726.51	1.31	-63.753	4.235	0.557	q1_ao_1_e3_5_80_0023_64_0008_68_0014_69_0039
-4718.52	1.984	-50.458	4.219	0.557	q1_ao_1_e3_6_15_0001_66_0008_73_0030_73_0022
-4720.06	1.932	-50.473	4.226	0.557	q1_ao_1_e3_6_15_0001_66_0008_73_0030_73_0029
-4718.64	1.941	-50.453	4.206	0.557	q1_ao_1_e3_6_15_0001_66_0008_73_0031_73_0015
-4719.29	1.973	-49.985	4.214	0.557	q1_ao_1_e3_6_15_0001_66_0008_73_0031_73_0035
-4719.26	1.931	-50.34	4.205	0.557	q1_ao_1_e3_6_15_0001_66_0008_73_0033_73_0007
-4722.93	2.026	-51.382	4.197	0.557	q1_ao_1_e3_6_15_0001_66_0008_73_0033_73_0009
-4720.23	1.995	-50.096	4.219	0.557	q1_ao_1_e3_6_15_0001_66_0020_73_0015_73_0002
-4719.84	1.964	-49.537	4.219	0.557	q1_ao_1_e3_6_15_0001_66_0020_73_0015_73_0019
-4719.98	1.925	-50.472	4.206	0.557	q1_ao_1_e3_6_15_0001_66_0020_73_0015_73_0021
-4719.4	1.981	-52.42	4.228	0.557	q1_ao_1_e3_6_15_0001_66_0020_73_0015_73_0038
-4719.96	1.94	-51.311	4.211	0.557	q1_ao_1_e3_6_15_0001_66_0020_73_0016_73_0031
-4719.98	1.846	-54.464	4.217	0.557	q1_ao_1_e3_6_15_0001_66_0020_73_0016_73_0036
-4721.65	2.054	-50.184	4.197	0.557	q1_ao_1_e3_6_15_0001_66_0020_73_0024_74_0004
-4718.15	2.04	-49.285	4.203	0.557	q1_ao_1_e3_6_15_0001_66_0020_73_0024_74_0006
-4720	1.968	-50.162	4.213	0.557	q1_ao_1_e3_6_15_0001_66_0020_73_0027_74_0038
-4719.81	1.882	-50.302	4.197	0.557	q1_ao_1_e3_6_15_0001_66_0033_73_0012_74_0001
-4721.7	2.024	-50.109	4.192	0.557	q1_ao_1_e3_6_15_0001_66_0033_73_0012_74_0039
-4722.27	2.11	-50.525	4.208	0.557	q1_ao_1_e3_6_15_0001_66_0033_73_0015_74_0019
-4720.13	1.94	-50.503	4.22	0.557	q1_ao_1_e3_6_15_0001_66_0033_73_0015_74_0023
-4719.27	1.879	-51.06	4.216	0.557	q1_ao_1_e3_6_15_0001_66_0033_73_0015_74_0033
-4723.55	1.256	-58.783	4.226	0.557	q1_ao_1_e3_6_28_0008_67_0006_74_0008_74_0001
-4724.01	1.258	-59.691	4.225	0.557	q1_ao_1_e3_6_28_0008_67_0006_74_0008_74_0003
-4722.42	1.279	-58.463	4.227	0.557	q1_ao_1_e3_6_28_0008_67_0006_74_0008_74_0009
-4724.21	1.192	-59.717	4.228	0.557	q1_ao_1_e3_6_28_0008_67_0006_74_0008_74_0038
-4724.26	1.145	-60.875	4.22	0.557	q1_ao_1_e3_6_28_0008_67_0006_74_0010_74_0021
-4722.07	1.21	-59.71	4.232	0.557	q1_ao_1_e3_6_28_0008_67_0006_74_0010_74_0038
-4729.53	1.342	-62.714	4.211	0.557	q1_ao_1_e3_6_28_0008_67_0006_74_0014_75_0009
-4723.2	1.279	-59.125	4.226	0.557	q1_ao_1_e3_6_28_0008_67_0006_74_0018_75_0005
-4724.31	1.278	-60.371	4.227	0.557	q1_ao_1_e3_6_28_0008_67_0006_74_0018_75_0013
-4721.74	1.34	-58.724	4.235	0.557	q1_ao_1_e3_6_28_0008_67_0006_74_0018_75_0039
-4722.19	2.855	-50.798	4.314	0.557	q1_ao_1_e3_6_28_0008_67_0008_74_0018_75_0005
-4725.07	1.633	-58.194	4.303	0.557	q1_ao_1_e3_6_28_0008_67_0008_74_0018_75_0023
-4722.86	2.277	-53.03	4.292	0.557	q1_ao_1_e3_6_28_0008_67_0008_74_0018_75_0026
-4723.05	1.958	-61.086	4.314	0.557	q1_ao_1_e3_6_28_0008_67_0008_74_0018_75_0032
-4723	2.557	-52.586	4.256	0.557	q1_ao_1_e3_6_28_0008_67_0008_74_0018_75_0034
-4720.8	2.985	-50.603	4.191	0.557	q1_ao_1_e3_6_29_0033_68_0008_75_0012_77_0028
-4723.52	3.281	-55.144	4.209	0.557	q1_ao_1_e3_6_29_0033_68_0008_75_0023_77_0006
-4719.45	2.976	-55.03	4.225	0.557	q1_ao_1_e3_6_29_0033_68_0008_75_0023_77_0007
-4718.33	2.879	-51.299	4.211	0.557	q1_ao_1_e3_6_29_0033_68_0008_75_0023_77_0009
-4719.43	3.011	-54.119	4.232	0.557	q1_ao_1_e3_6_29_0033_68_0008_75_0023_77_0012
-4719.74	3.027	-54.277	4.221	0.557	q1_ao_1_e3_6_29_0033_68_0008_75_0023_77_0025
-4722.81	3.127	-54.821	4.213	0.557	q1_ao_1_e3_6_29_0033_68_0008_75_0023_77_0032
-4717.78	2.795	-52.38	4.213	0.557	q1_ao_1_e3_6_29_0033_68_0008_75_0026_77_0001
-4720.05	2.98	-56.074	4.225	0.557	q1_ao_1_e3_6_29_0033_68_0008_75_0028_77_0016
-4717.2	2.837	-50.261	4.198	0.557	q1_ao_1_e3_6_29_0033_68_0008_75_0028_77_0026
-4717.99	2.779	-50.253	4.202	0.557	q1_ao_1_e3_6_29_0033_68_0008_75_0028_77_0027
-4726.14	3.192	-53.218	4.206	0.557	q1_ao_1_e3_10_48_0036_6_0011_9_0025_7_0038
-4721.62	2.068	-55.468	4.225	0.557	q1_ao_1_e3_6_38_0024_69_0018_79_0012_81_0025
-4721.41	2.091	-55.614	4.228	0.557	q1_ao_1_e3_6_38_0024_69_0018_79_0012_81_0026
-4722.05	2.119	-54.876	4.228	0.557	q1_ao_1_e3_6_38_0024_69_0018_79_0012_81_0028
-4727.53	1.389	-61.732	4.208	0.557	q1_ao_1_e3_6_38_0024_69_0018_79_0022_81_0031
-4726.92	1.085	-60.845	4.196	0.557	q1_ao_1_e3_6_38_0024_69_0018_79_0022_81_0035
-4721.64	2.097	-55.777	4.236	0.557	q1_ao_1_e3_6_38_0024_69_0018_79_0023_81_0004
-4727.73	2.046	-60.27	4.235	0.557	q1_ao_1_e3_6_38_0024_69_0018_79_0023_81_0007
-4720.27	2.076	-55.2	4.232	0.557	q1_ao_1_e3_6_38_0024_69_0018_79_0023_81_0011
-4723.66	2.014	-56.375	4.227	0.557	q1_ao_1_e3_6_38_0024_69_0018_79_0023_81_0029
-4720.16	2.105	-55.259	4.227	0.557	q1_ao_1_e3_6_38_0024_69_0018_79_0023_81_0030
-4723.33	2.046	-56.98	4.239	0.557	q1_ao_1_e3_6_38_0024_69_0018_79_0023_81_0032
-4716.63	1.681	-51.964	4.341	0.557	q1_ao_1_e3_6_40_0012_69_0017_80_0001_82_0011
-4718.1	1.653	-55.24	4.379	0.557	q1_ao_1_e3_6_40_0012_69_0017_80_0001_82_0019
-4715.43	1.762	-52.823	4.351	0.557	q1_ao_1_e3_6_40_0012_69_0017_80_0009_82_0001
-4718.18	1.719	-49.783	4.364	0.557	q1_ao_1_e3_6_40_0012_69_0017_80_0009_82_0004
-4715.78	1.723	-52.522	4.363	0.557	q1_ao_1_e3_6_40_0012_69_0017_80_0009_82_0007
-4717.12	1.72	-53.434	4.337	0.557	q1_ao_1_e3_6_40_0012_69_0017_80_0009_82_0008
-4717.85	1.72	-54.254	4.344	0.557	q1_ao_1_e3_6_40_0012_69_0017_80_0009_82_0011
-4718.54	1.694	-54.257	4.345	0.557	q1_ao_1_e3_6_40_0012_69_0017_80_0009_82_0013
-4718.1	1.679	-52.766	4.338	0.557	q1_ao_1_e3_6_40_0012_69_0017_80_0009_82_0040
-4713.45	1.699	-51.545	4.355	0.557	q1_ao_1_e3_6_40_0012_69_0017_80_0021_82_0026
-4715.44	1.79	-52.31	4.364	0.557	q1_ao_1_e3_6_40_0012_69_0017_80_0021_82_0029
-4714.51	1.755	-52.937	4.348	0.557	q1_ao_1_e3_6_40_0012_69_0017_80_0021_82_0033
-4718.79	1.85	-52.353	4.361	0.557	q1_ao_1_e3_6_40_0012_69_0017_80_0024_82_0019
-4716.69	1.748	-50.401	4.314	0.557	q1_ao_1_e3_6_40_0012_69_0017_80_0024_82_0022
-4716.58	1.747	-53.859	4.357	0.557	q1_ao_1_e3_6_40_0012_69_0017_80_0024_82_0028
-4717.77	1.701	-53.763	4.343	0.557	q1_ao_1_e3_6_40_0012_69_0017_80_0024_82_0035
-4719.96	1.814	-55.9	4.341	0.557	q1_ao_1_e3_6_40_0012_69_0017_80_0024_82_0038
-4719.26	1.713	-54.758	4.338	0.557	q1_ao_1_e3_6_40_0012_69_0017_80_0027_83_0009
-4718.05	2.613	-57.711	4.357	0.557	q1_ao_1_e3_6_80_0007_74_0004_86_0027_87_0033
-4716.51	2.859	-57.793	4.242	0.557	q1_ao_1_e3_6_80_0007_74_0032_86_0004_88_0001
-4719.91	2.765	-57.875	4.22	0.557	q1_ao_1_e3_6_80_0007_74_0032_86_0004_88_0013
-4727.27	1.383	-61.453	4.203	0.557	q1_ao_1_e3_7_77_0038_82_0028_92_0017_94_0003
-4726.02	1.589	-62.091	4.206	0.557	q1_ao_1_e3_7_77_0038_82_0028_92_0017_94_0030
-4721.68	1.469	-54.703	4.22	0.557	q1_ao_1_e3_7_77_0038_82_0028_92_0019_94_0002
-4729.32	2.09	-62.848	4.199	0.557	q1_ao_1_e3_7_77_0038_82_0028_92_0038_94_0028
-4717.49	2.144	-49.732	4.214	0.557	q1_ao_1_e3_7_79_0026_82_0015_92_0012_94_0038
-4716.37	2.151	-49.228	4.274	0.557	q1_ao_1_e3_7_93_0014_83_0014_93_0004_95_0004
-4724.04	2.019	-58.635	4.219	0.557	q1_ao_1_e3_8_2_0023_85_0015_94_0020_96_0007
-4726.43	2.183	-57.937	4.239	0.557	q1_ao_1_e3_8_2_0023_85_0015_94_0020_96_0008
-4724.46	2.058	-58.848	4.224	0.557	q1_ao_1_e3_8_2_0023_85_0015_94_0020_96_0031
-4725.38	2.231	-57.038	4.249	0.557	q1_ao_1_e3_8_2_0023_85_0015_94_0020_96_0032
-4723.69	2.129	-56.847	4.204	0.557	q1_ao_1_e3_8_2_0023_85_0015_94_0020_96_0039
-4724.22	2.127	-56.903	4.241	0.557	q1_ao_1_e3_8_2_0023_85_0015_94_0020_96_0040
-4720.4	2.315	-47.146	4.194	0.544	q1_ao_1_e3_6_15_0001_66_0003
-4717.51	1.716	-50	4.238	0.544	q1_ao_1_e3_6_28_0008_67_0006
-4726.51	3.448	-50.62	4.26	0.544	q1_ao_1_e3_10_7_0006_9_0017_15_0002
-4725.21	2.309	-56.065	4.202	0.544	q1_ao_1_e3_2_14_0005_26_0004_32_0004
-4722.16	2.308	-56.529	4.247	0.544	q1_ao_1_e3_2_14_0005_26_0006_32_0021
-4724.58	4.068	-54.689	4.304	0.544	q1_ao_1_e3_3_11_0002_36_0021_40_0002
-4728.15	4.164	-54.439	4.295	0.544	q1_ao_1_e3_3_11_0002_36_0021_40_0004
-4723.34	3.79	-55.548	4.309	0.544	q1_ao_1_e3_3_16_0003_37_0002_41_0018
-4712.98	2.521	-47.79	4.284	0.544	q1_ao_1_e3_3_16_0003_37_0031_41_0013
-4720.97	2.23	-55.1	4.226	0.544	q1_ao_1_e3_3_26_0040_38_0035_43_0003
-4721.02	3.595	-50.572	4.266	0.544	q1_ao_1_e3_3_59_0021_41_0020_47_0023
-4716.29	4.476	-45.6	4.215	0.544	q1_ao_1_e3_4_14_0023_48_0005_56_0032
-4730.48	2.975	-61.31	4.347	0.544	q1_ao_1_e3_5_2_0019_58_0006_62_0033
-4724.18	4.206	-50.938	4.213	0.544	q1_ao_1_e3_5_7_0035_63_0009_67_0010
-4726.64	1.732	-61.71	4.235	0.544	q1_ao_1_e3_5_80_0023_64_0008_68_0014
-4721.57	2.183	-48.35	4.199	0.544	q1_ao_1_e3_6_15_0001_66_0003_73_0031
-4717.16	2.005	-50.874	4.221	0.544	q1_ao_1_e3_6_15_0001_66_0020_73_0010
-4722.4	2.269	-50.387	4.205	0.544	q1_ao_1_e3_6_15_0001_66_0020_73_0024
-4722.87	2.203	-49.87	4.207	0.544	q1_ao_1_e3_6_15_0001_66_0020_73_0027
-4717.5	2.025	-50.212	4.22	0.544	q1_ao_1_e3_6_15_0001_66_0033_73_0015
-4718.79	3.041	-53.465	4.228	0.544	q1_ao_1_e3_6_29_0033_68_0008_75_0023
-4721.59	3.83	-51.56	4.254	0.544	q1_ao_1_e3_6_38_0024_69_0030_79_0018
-4720.94	1.634	-57	4.354	0.544	q1_ao_1_e3_6_40_0012_69_0017_80_0001
-4714.94	1.858	-49.509	4.351	0.544	q1_ao_1_e3_6_40_0012_69_0017_80_0002
-4715.85	3.684	-54.143	4.268	0.544	q1_ao_1_e3_6_80_0007_74_0032_86_0004
-4722.05	1.61	-59.486	4.209	0.544	q1_ao_1_e3_7_77_0038_82_0028_92_0007
-4723.89	3.604	-46.944	4.196	0.544	q1_ao_1_e3_7_77_0038_82_0036_92_0001
-4721.47	3.524	-47.248	4.196	0.544	q1_ao_1_e3_7_77_0038_82_0036_92_0017
-4721.07	3.527	-47.153	4.195	0.544	q1_ao_1_e3_7_77_0038_82_0036_92_0022
-4720.82	3.609	-47.02	4.195	0.544	q1_ao_1_e3_7_77_0038_82_0036_92_0024
-4715.56	2.213	-49.117	4.242	0.544	q1_ao_1_e3_7_93_0014_83_0012_93_0036
-4719.38	2.461	-49.218	4.277	0.544	q1_ao_1_e3_8_2_0023_85_0003_94_0014
-4725.71	2.486	-56.824	4.236	0.544	q1_ao_1_e3_8_2_0023_85_0015_94_0020
-4725.48	3.59	-52.563	4.254	0.544	q1_ao_1_e3_10_7_0006_9_0017_15_0002_13_0008
-4724.34	3.616	-52.085	4.252	0.544	q1_ao_1_e3_10_7_0006_9_0017_15_0002_13_0011
-4726.45	3.613	-53.028	4.256	0.544	q1_ao_1_e3_10_7_0006_9_0017_15_0002_13_0014
-4725.16	3.719	-52.373	4.24	0.544	q1_ao_1_e3_10_7_0006_9_0017_15_0002_13_0020
-4724.4	3.482	-52.305	4.262	0.544	q1_ao_1_e3_10_7_0006_9_0017_15_0002_13_0032
-4723.31	3.503	-49.786	4.248	0.544	q1_ao_1_e3_10_7_0006_9_0017_15_0002_13_0038
-4722.6	3.59	-51.301	4.276	0.544	q1_ao_1_e3_10_7_0006_9_0017_15_0015_13_0008
-4724.9	3.487	-51.427	4.263	0.544	q1_ao_1_e3_10_7_0006_9_0017_15_0015_13_0012
-4723.46	3.557	-49.642	4.256	0.544	q1_ao_1_e3_10_7_0006_9_0017_15_0015_13_0017
-4722.37	3.545	-49.311	4.262	0.544	q1_ao_1_e3_10_7_0006_9_0017_15_0015_13_0031
-4721.22	3.331	-49.812	4.273	0.544	q1_ao_1_e3_10_7_0006_9_0019_15_0037_13_0022
-4724.12	3.333	-52.828	4.253	0.544	q1_ao_1_e3_10_7_0006_9_0019_15_0037_13_0026
-4724.95	3.429	-54.379	4.251	0.544	q1_ao_1_e3_10_7_0006_9_0019_15_0037_13_0034
-4726.57	3.071	-58.69	4.336	0.544	q1_ao_1_e3_2_14_0005_26_0001_32_0005_25_0017
-4721.65	2.763	-54.624	4.336	0.544	q1_ao_1_e3_2_14_0005_26_0001_32_0005_25_0029
-4724.6	2.662	-58.558	4.319	0.544	q1_ao_1_e3_2_14_0005_26_0001_32_0005_25_0037
-4723	1.936	-59.11	4.234	0.544	q1_ao_1_e3_2_14_0005_26_0004_32_0004_25_0005
-4726.85	2.064	-57.768	4.236	0.544	q1_ao_1_e3_2_14_0005_26_0004_32_0004_25_0019
-4715.19	1.967	-57.033	4.233	0.544	q1_ao_1_e3_2_14_0005_26_0004_32_0004_25_0021
-4716.86	2.63	-52.725	4.343	0.544	q1_ao_1_e3_2_14_0005_26_0029_33_0026_26_0013
-4715.61	2.577	-56.2	4.346	0.544	q1_ao_1_e3_2_14_0005_26_0029_33_0026_26_0015
-4719.73	2.574	-55.873	4.34	0.544	q1_ao_1_e3_2_14_0005_26_0029_33_0026_26_0017
-4728.03	3.316	-55.949	4.296	0.544	q1_ao_1_e3_10_34_0020_4_0039_4_0015_2_0003
-4725.26	3.322	-55.187	4.296	0.544	q1_ao_1_e3_10_34_0020_4_0039_4_0015_2_0025
-4722.94	2.429	-49.527	4.311	0.544	q1_ao_1_e3_2_50_0033_31_0017_36_0025_30_0022
-4716.34	1.999	-54.849	4.346	0.544	q1_ao_1_e3_2_50_0033_31_0017_36_0032_30_0013
-4718.8	2.122	-54.114	4.329	0.544	q1_ao_1_e3_2_50_0033_31_0017_36_0032_30_0020
-4723.4	1.995	-56.711	4.307	0.544	q1_ao_1_e3_2_50_0033_31_0017_36_0032_30_0036
-4714.07	2.45	-41.182	4.282	0.544	q1_ao_1_e3_2_50_0036_31_0001_36_0001_31_0002
-4713.02	2.689	-47.641	4.312	0.544	q1_ao_1_e3_2_50_0036_31_0014_37_0030_32_0035
-4718.89	2.736	-56.901	4.324	0.544	q1_ao_1_e3_2_50_0036_31_0016_37_0001_33_0002
-4719.81	2.648	-55.409	4.331	0.544	q1_ao_1_e3_2_50_0036_31_0016_37_0001_33_0005
-4712.15	3.052	-53.558	4.351	0.544	q1_ao_1_e3_2_50_0036_31_0016_37_0001_33_0011
-4714.46	2.763	-51.872	4.342	0.544	q1_ao_1_e3_2_50_0036_31_0016_37_0001_33_0025
-4714.01	2.781	-53.958	4.345	0.544	q1_ao_1_e3_2_50_0036_31_0016_37_0001_33_0037
-4716.83	2.756	-54.953	4.339	0.544	q1_ao_1_e3_2_50_0036_31_0016_37_0001_33_0038
-4709.49	2.33	-39.545	4.279	0.544	q1_ao_1_e3_2_50_0036_31_0016_37_0025_33_0038
-4720.85	3.938	-52.112	4.26	0.544	q1_ao_1_e3_3_11_0002_36_0021_40_0002_35_0001
-4727.16	3.928	-56.385	4.285	0.544	q1_ao_1_e3_3_11_0002_36_0021_40_0002_35_0028
-4726.67	3.763	-57.132	4.281	0.544	q1_ao_1_e3_3_11_0002_36_0021_40_0002_35_0037
-4728.15	3.851	-53.343	4.263	0.544	q1_ao_1_e3_3_11_0002_36_0021_40_0004_35_0004
-4725.29	4.007	-55.725	4.277	0.544	q1_ao_1_e3_3_11_0002_36_0021_40_0004_35_0031
-4722.45	3.458	-55.215	4.31	0.544	q1_ao_1_e3_3_16_0003_37_0002_41_0018_36_0010
-4723.17	3.266	-53.144	4.298	0.544	q1_ao_1_e3_3_16_0003_37_0002_41_0018_36_0033
-4720.05	2.29	-54.448	4.222	0.544	q1_ao_1_e3_3_26_0040_38_0035_43_0003_40_0007
-4720.27	2.258	-54.756	4.226	0.544	q1_ao_1_e3_3_26_0040_38_0035_43_0003_40_0008
-4720.02	2.148	-55.09	4.226	0.544	q1_ao_1_e3_3_26_0040_38_0035_43_0003_40_0013
-4717.97	2.344	-54.267	4.229	0.544	q1_ao_1_e3_3_26_0040_38_0035_43_0003_40_0040
-4722.46	3.279	-52.546	4.273	0.544	q1_ao_1_e3_3_59_0021_41_0020_47_0013_43_0018
-4726.4	3.122	-53.862	4.201	0.544	q1_ao_1_e3_3_59_0021_41_0020_47_0013_43_0025
-4719.89	3.643	-50.951	4.284	0.544	q1_ao_1_e3_3_59_0021_41_0020_47_0013_43_0026
-4721.23	3.661	-51.963	4.265	0.544	q1_ao_1_e3_3_59_0021_41_0020_47_0013_43_0028
-4721.98	3.291	-50.831	4.281	0.544	q1_ao_1_e3_3_59_0021_41_0020_47_0017_43_0010
-4719.89	3.608	-48.874	4.26	0.544	q1_ao_1_e3_3_59_0021_41_0020_47_0017_43_0029
-4717.97	3.66	-50.19	4.289	0.544	q1_ao_1_e3_3_59_0021_41_0020_47_0017_43_0032
-4720.45	3.946	-51.699	4.27	0.544	q1_ao_1_e3_3_59_0021_41_0020_47_0028_43_0008
-4723.11	3.457	-52.823	4.259	0.544	q1_ao_1_e3_3_59_0021_41_0020_47_0028_43_0030
-4721.78	3.605	-51.832	4.273	0.544	q1_ao_1_e3_3_59_0021_41_0020_47_0028_43_0037
-4723.93	3.28	-50.164	4.284	0.544	q1_ao_1_e3_3_59_0021_41_0020_47_0040_44_0014
-4725.21	3.086	-50.776	4.286	0.544	q1_ao_1_e3_3_59_0021_41_0020_47_0040_44_0020
-4717.85	3.819	-48.912	4.299	0.544	q1_ao_1_e3_3_59_0021_41_0020_47_0040_44_0038
-4723.87	2.33	-56.102	4.3	0.544	q1_ao_1_e3_3_66_0034_43_0001_49_0018_44_0002
-4718.18	2.536	-54.014	4.315	0.544	q1_ao_1_e3_3_66_0034_43_0001_49_0018_44_0014
-4716.1	2.43	-53.205	4.311	0.544	q1_ao_1_e3_3_66_0034_43_0001_49_0018_44_0017
-4720.56	2.54	-54.231	4.329	0.544	q1_ao_1_e3_3_66_0034_43_0001_49_0018_44_0025
-4717.46	2.531	-54.996	4.343	0.544	q1_ao_1_e3_3_66_0034_43_0001_49_0018_44_0029
-4721.08	2.58	-52.486	4.335	0.544	q1_ao_1_e3_3_66_0034_43_0001_49_0018_44_0035
-4720.52	2.475	-53.941	4.323	0.544	q1_ao_1_e3_3_66_0034_43_0001_49_0018_44_0036
-4717.94	2.499	-51.331	4.301	0.544	q1_ao_1_e3_3_66_0034_43_0018_49_0034_45_0006
-4718.76	2.523	-51.125	4.307	0.544	q1_ao_1_e3_3_66_0034_43_0018_49_0034_45_0010
-4718.77	2.611	-51.029	4.298	0.544	q1_ao_1_e3_3_66_0034_43_0018_49_0034_45_0018
-4715.26	2.396	-51.733	4.292	0.544	q1_ao_1_e3_3_66_0034_43_0018_49_0034_45_0024
-4720.98	2.375	-52.782	4.275	0.544	q1_ao_1_e3_3_66_0034_43_0018_49_0034_45_0025
-4719.28	2.639	-52.385	4.308	0.544	q1_ao_1_e3_3_66_0034_43_0018_49_0034_45_0038
-4723.05	1.977	-56.218	4.213	0.544	q1_ao_1_e3_3_84_0017_45_0032_53_0014_49_0034
-4716.18	3.996	-47.173	4.232	0.544	q1_ao_1_e3_3_93_0040_46_0028_55_0008_53_0027
-4709.02	2.581	-49.875	4.3	0.544	q1_ao_1_e3_3_93_0040_46_0028_55_0031_54_0032
-4708.96	2.279	-48.286	4.304	0.544	q1_ao_1_e3_3_93_0040_46_0038_55_0002_54_0038
-4719.46	3.172	-48.673	4.202	0.544	q1_ao_1_e3_4_14_0023_48_0005_56_0035_56_0005
-4715.3	3.144	-47.988	4.2	0.544	q1_ao_1_e3_4_14_0023_48_0005_56_0035_56_0009
-4718.89	3.111	-48.538	4.198	0.544	q1_ao_1_e3_4_14_0023_48_0005_56_0035_56_0032
-4719.52	3.184	-48.514	4.2	0.544	q1_ao_1_e3_4_14_0023_48_0005_56_0035_56_0033
-4724.18	2.478	-51.329	4.154	0.544	q1_ao_1_e3_4_14_0023_48_0005_56_0035_56_0035
-4717.7	3.088	-53.782	4.343	0.544	q1_ao_1_e3_10_4_0026_5_0013_7_0012_5_0037
-4731.6	3.544	-56.369	4.253	0.544	q1_ao_1_e3_10_4_0026_5_0033_7_0028_5_0025
-4725.76	3.877	-54.706	4.277	0.544	q1_ao_1_e3_4_92_0039_55_0008_61_0015_64_0020
-4728.28	3.437	-58.603	4.264	0.544	q1_ao_1_e3_4_92_0039_55_0008_61_0015_64_0036
-4724.65	2.245	-59.02	4.338	0.544	q1_ao_1_e3_5_2_0019_58_0006_62_0033_65_0017
-4729.54	2.241	-61.883	4.315	0.544	q1_ao_1_e3_5_2_0019_58_0006_62_0033_65_0022
-4728.39	2.342	-62.324	4.322	0.544	q1_ao_1_e3_5_2_0019_58_0006_62_0033_65_0031
-4726.76	2.467	-57.764	4.3	0.544	q1_ao_1_e3_5_2_0019_58_0009_62_0028_65_0022
-4727.59	1.399	-62.726	4.221	0.544	q1_ao_1_e3_5_80_0023_64_0034_68_0031_71_0005
-4720.57	3.206	-54.282	4.349	0.544	q1_ao_1_e3_5_80_0023_64_0034_68_0031_71_0014
-4727.06	3.198	-58.2	4.306	0.544	q1_ao_1_e3_5_80_0023_64_0034_68_0031_71_0028
-4721.13	1.826	-51.281	4.216	0.544	q1_ao_1_e3_6_15_0001_66_0008_73_0030_73_0038
-4719.25	1.97	-50.096	4.209	0.544	q1_ao_1_e3_6_15_0001_66_0020_73_0004_73_0019
-4720.82	2.099	-51.119	4.203	0.544	q1_ao_1_e3_6_15_0001_66_0020_73_0010_73_0001
-4717.94	2.017	-49.511	4.217	0.544	q1_ao_1_e3_6_15_0001_66_0020_73_0015_73_0003
-4720.62	2.088	-50.609	4.195	0.544	q1_ao_1_e3_6_15_0001_66_0020_73_0015_73_0017
-4721.22	1.964	-50.694	4.217	0.544	q1_ao_1_e3_6_15_0001_66_0020_73_0015_73_0027
-4720.27	2.001	-50.898	4.223	0.544	q1_ao_1_e3_6_15_0001_66_0020_73_0015_73_0033
-4723.95	1.283	-52.287	4.152	0.544	q1_ao_1_e3_6_15_0001_66_0020_73_0015_73_0034
-4713.97	2.03	-51.499	4.218	0.544	q1_ao_1_e3_6_15_0001_66_0020_73_0016_73_0004
-4721.33	2.072	-50.775	4.206	0.544	q1_ao_1_e3_6_15_0001_66_0020_73_0016_73_0021
-4718.73	1.932	-50.244	4.216	0.544	q1_ao_1_e3_6_15_0001_66_0020_73_0024_74_0024
-4720.82	1.921	-50.406	4.2	0.544	q1_ao_1_e3_6_15_0001_66_0020_73_0027_74_0021
-4721.28	1.925	-50.164	4.209	0.544	q1_ao_1_e3_6_15_0001_66_0020_73_0027_74_0040
-4723.12	1.729	-52.053	4.277	0.544	q1_ao_1_e3_6_15_0001_66_0033_73_0008_74_0002
-4721.71	1.804	-51.384	4.259	0.544	q1_ao_1_e3_6_15_0001_66_0033_73_0008_74_0012
-4725.31	1.853	-52.282	4.262	0.544	q1_ao_1_e3_6_15_0001_66_0033_73_0008_74_0021
-4724.38	1.809	-52.807	4.266	0.544	q1_ao_1_e3_6_15_0001_66_0033_73_0008_74_0023
-4721.23	1.815	-51.814	4.261	0.544	q1_ao_1_e3_6_15_0001_66_0033_73_0008_74_0026
-4725.1	1.8	-53.147	4.259	0.544	q1_ao_1_e3_6_15_0001_66_0033_73_0008_74_0037
-4725.16	1.898	-53.64	4.198	0.544	q1_ao_1_e3_6_15_0001_66_0033_73_0015_74_0017
-4719.44	1.898	-50.393	4.22	0.544	q1_ao_1_e3_6_15_0001_66_0033_73_0015_74_0020
-4718.74	1.971	-50.814	4.225	0.544	q1_ao_1_e3_6_15_0001_66_0033_73_0015_74_0027
-4728.36	1.202	-61.811	4.213	0.544	q1_ao_1_e3_6_28_0008_67_0006_74_0014_75_0007
-4720.35	1.39	-56.538	4.226	0.544	q1_ao_1_e3_6_28_0008_67_0006_74_0014_75_0040
-4722.03	2.916	-51.801	4.329	0.544	q1_ao_1_e3_6_28_0008_67_0008_74_0018_75_0016
-4724.19	2.286	-55.896	4.276	0.544	q1_ao_1_e3_6_28_0008_67_0008_74_0018_75_0018
-4722.73	2.722	-52.356	4.289	0.544	q1_ao_1_e3_6_28_0008_67_0028_74_0018_76_0026
-4721.86	2.53	-52.879	4.31	0.544	q1_ao_1_e3_6_28_0008_67_0028_74_0039_77_0037
-4715.04	2.625	-52.226	4.228	0.544	q1_ao_1_e3_6_29_0033_68_0008_75_0023_77_0005
-4717.33	3.21	-51.099	4.206	0.544	q1_ao_1_e3_6_29_0033_68_0008_75_0023_77_0011
-4718.52	2.924	-54.177	4.236	0.544	q1_ao_1_e3_6_29_0033_68_0008_75_0023_77_0017
-4720.33	2.868	-53.12	4.197	0.544	q1_ao_1_e3_6_29_0033_68_0008_75_0023_77_0024
-4720.18	3.004	-54.952	4.226	0.544	q1_ao_1_e3_6_29_0033_68_0008_75_0023_77_0029
-4711.45	2.642	-49.287	4.213	0.544	q1_ao_1_e3_6_29_0033_68_0008_75_0023_77_0034
-4716.33	2.929	-48.893	4.211	0.544	q1_ao_1_e3_6_29_0033_68_0008_75_0026_77_0004
-4717.24	2.914	-50.72	4.211	0.544	q1_ao_1_e3_6_29_0033_68_0008_75_0026_77_0010
-4714.07	2.812	-49.673	4.214	0.544	q1_ao_1_e3_6_29_0033_68_0008_75_0026_77_0030
-4717.42	2.819	-53.153	4.215	0.544	q1_ao_1_e3_6_29_0033_68_0008_75_0028_77_0015
-4717.51	2.799	-52.86	4.217	0.544	q1_ao_1_e3_6_29_0033_68_0008_75_0028_77_0022
-4717.67	2.836	-53.171	4.214	0.544	q1_ao_1_e3_6_29_0033_68_0008_75_0028_77_0036
-4713.9	2.629	-49.669	4.206	0.544	q1_ao_1_e3_6_29_0033_68_0008_75_0028_77_0040
-4714.82	3.443	-50.171	4.327	0.544	q1_ao_1_e3_10_43_0040_5_0034_9_0038_7_0013
-4718.62	3.152	-47.472	4.25	0.544	q1_ao_1_e3_10_48_0036_6_0011_9_0004_7_0017
-4722.59	3.255	-48.572	4.144	0.544	q1_ao_1_e3_10_48_0036_6_0011_9_0025_7_0016
-4730.48	1.232	-64.562	4.195	0.544	q1_ao_1_e3_6_38_0024_69_0018_79_0022_81_0022
-4724.92	1.225	-62.209	4.214	0.544	q1_ao_1_e3_6_38_0024_69_0018_79_0022_81_0025
-4727.31	1.214	-64.816	4.195	0.544	q1_ao_1_e3_6_38_0024_69_0018_79_0022_81_0040
-4728.39	1.183	-62.155	4.226	0.544	q1_ao_1_e3_6_38_0024_69_0018_79_0036_82_0002
-4726.15	1.137	-64.415	4.23	0.544	q1_ao_1_e3_6_38_0024_69_0018_79_0036_82_0022
-4724.42	1.176	-61.727	4.238	0.544	q1_ao_1_e3_6_38_0024_69_0018_79_0036_82_0027
-4731.26	1.095	-64.647	4.206	0.544	q1_ao_1_e3_6_38_0024_69_0018_79_0036_82_0039
-4726.4	1.194	-62.337	4.214	0.544	q1_ao_1_e3_6_38_0024_69_0018_79_0036_82_0040
-4724.76	3.466	-54.46	4.232	0.544	q1_ao_1_e3_6_38_0024_69_0030_79_0018_82_0004
-4720.21	4.072	-52.633	4.271	0.544	q1_ao_1_e3_6_38_0024_69_0030_79_0018_82_0036
-4721.3	2.465	-56.854	4.212	0.544	q1_ao_1_e3_6_38_0024_69_0030_79_0019_82_0012
-4720.52	2.307	-57.7	4.227	0.544	q1_ao_1_e3_6_80_0007_74_0011_86_0024_87_0001
-4722.21	2.368	-58.678	4.23	0.544	q1_ao_1_e3_6_80_0007_74_0011_86_0024_87_0015
-4721.38	2.268	-59.054	4.216	0.544	q1_ao_1_e3_6_80_0007_74_0011_86_0024_87_0016
-4721.82	2.276	-58.179	4.225	0.544	q1_ao_1_e3_6_80_0007_74_0011_86_0024_87_0025
-4720.11	2.557	-56.891	4.225	0.544	q1_ao_1_e3_6_80_0007_74_0011_86_0024_87_0034
-4719.27	2.498	-57.722	4.22	0.544	q1_ao_1_e3_6_80_0007_74_0011_86_0024_87_0036
-4719.57	2.343	-56.648	4.231	0.544	q1_ao_1_e3_6_80_0007_74_0011_86_0024_87_0037
-4720.73	2.397	-57.935	4.217	0.544	q1_ao_1_e3_6_80_0007_74_0011_86_0024_87_0038
-4723.9	2.458	-60.982	4.216	0.544	q1_ao_1_e3_6_80_0007_74_0032_86_0004_88_0002
-4714.46	2.644	-56.769	4.24	0.544	q1_ao_1_e3_6_80_0007_74_0032_86_0004_88_0003
-4723.89	2.65	-60.654	4.204	0.544	q1_ao_1_e3_6_80_0007_74_0032_86_0004_88_0006
-4719.81	3.291	-49.35	4.309	0.544	q1_ao_1_e3_10_48_0036_6_0027_9_0028_8_0026
-4729.68	1.447	-62.977	4.209	0.544	q1_ao_1_e3_7_77_0038_82_0028_92_0003_94_0001
-4723.59	1.39	-60.592	4.23	0.544	q1_ao_1_e3_7_77_0038_82_0028_92_0003_94_0003
-4727.8	1.428	-62.402	4.229	0.544	q1_ao_1_e3_7_77_0038_82_0028_92_0003_94_0006
-4734.52	1.482	-66.654	4.208	0.544	q1_ao_1_e3_7_77_0038_82_0028_92_0003_94_0014
-4729.34	1.508	-64.23	4.217	0.544	q1_ao_1_e3_7_77_0038_82_0028_92_0003_94_0031
-4728.61	1.428	-64.428	4.216	0.544	q1_ao_1_e3_7_77_0038_82_0028_92_0007_94_0001
-4693.71	1.328	-66.198	4.212	0.544	q1_ao_1_e3_7_77_0038_82_0028_92_0007_94_0015
-4725.41	1.336	-61.321	4.233	0.544	q1_ao_1_e3_7_77_0038_82_0028_92_0019_94_0018
-4722.94	1.742	-61.702	4.228	0.544	q1_ao_1_e3_7_77_0038_82_0028_92_0038_94_0024
-4719.77	5.35	-44.825	4.256	0.532	q1_ao_1_e3_10_17_0015_1_0007
-4720.67	5.976	-46.28	4.256	0.532	q1_ao_1_e3_10_17_0015_1_0037
-4721.75	3.985	-47.822	4.175	0.532	q1_ao_1_e3_4_14_0023_48_0005
-4721.76	4.009	-46.872	4.139	0.532	q1_ao_1_e3_4_23_0012_49_0024
-4714.4	4.113	-46.47	4.221	0.532	q1_ao_1_e3_4_62_0008_53_0030
-4716.1	2.948	-48.191	4.194	0.532	q1_ao_1_e3_6_29_0033_68_0008
-4711.58	2.439	-39.788	4.309	0.532	q1_ao_1_e3_6_40_0012_69_0034
-4722.17	3.574	-46.718	4.187	0.532	q1_ao_1_e3_7_77_0038_82_0036
-4725.98	3.958	-54.55	4.322	0.532	q1_ao_1_e3_10_69_0021_9_0018_14_0017
-4716.93	3.091	-57.454	4.288	0.532	q1_ao_1_e3_10_82_0027_11_0011_19_0015
-4722.73	3.344	-57.287	4.314	0.532	q1_ao_1_e3_2_14_0005_26_0001_32_0005
-4722.39	2.778	-52.889	4.339	0.532	q1_ao_1_e3_2_14_0005_26_0029_33_0026
-4726.81	3.339	-56.85	4.209	0.532	q1_ao_1_e3_2_16_0007_26_0002_33_0021
-4716.21	3.175	-42.493	4.307	0.532	q1_ao_1_e3_2_50_0036_31_0007_36_0033
-4714.16	2.626	-50.909	4.319	0.532	q1_ao_1_e3_2_50_0036_31_0016_37_0029
-4718.36	3.249	-54.129	4.315	0.532	q1_ao_1_e3_2_50_0036_31_0024_37_0032
-4719.02	3.29	-47.574	4.285	0.532	q1_ao_1_e3_3_16_0003_37_0023_41_0026
-4721.64	3.251	-50.084	4.277	0.532	q1_ao_1_e3_3_59_0021_41_0020_47_0013
-4721.28	3.428	-50.071	4.272	0.532	q1_ao_1_e3_3_59_0021_41_0020_47_0028
-4721.09	3.376	-50.033	4.286	0.532	q1_ao_1_e3_3_59_0021_41_0020_47_0040
-4729.67	3.377	-56.345	4.295	0.532	q1_ao_1_e3_10_34_0020_4_0039_4_0003
-4724.97	3.349	-54.554	4.299	0.532	q1_ao_1_e3_10_34_0020_4_0039_4_0014
-4727.76	3.321	-55.596	4.287	0.532	q1_ao_1_e3_10_34_0020_4_0039_4_0019
-4729.75	3.34	-57.474	4.283	0.532	q1_ao_1_e3_10_34_0020_4_0039_4_0027
-4723.37	3.262	-54.249	4.298	0.532	q1_ao_1_e3_10_34_0020_4_0039_4_0030
-4716.73	4.318	-44.771	4.215	0.532	q1_ao_1_e3_4_14_0023_48_0005_56_0005
-4712.35	4.486	-43.26	4.214	0.532	q1_ao_1_e3_4_14_0023_48_0005_56_0010
-4716.9	4.345	-47.336	4.195	0.532	q1_ao_1_e3_4_14_0023_48_0005_56_0011
-4714.52	4.537	-44.936	4.225	0.532	q1_ao_1_e3_4_14_0023_48_0005_56_0020
-4715.12	4.389	-45.298	4.216	0.532	q1_ao_1_e3_4_14_0023_48_0005_56_0031
-4722.85	3.846	-49.63	4.187	0.532	q1_ao_1_e3_4_14_0023_48_0005_56_0040
-4718.85	4.335	-48.618	4.161	0.532	q1_ao_1_e3_4_23_0012_49_0024_57_0032
-4719.69	4.309	-47.699	4.16	0.532	q1_ao_1_e3_4_23_0012_49_0024_57_0033
-4720.09	4.014	-48.858	4.185	0.532	q1_ao_1_e3_4_62_0008_53_0030_59_0004
-4714.29	4.072	-47.546	4.227	0.532	q1_ao_1_e3_4_62_0008_53_0030_59_0024
-4719.6	4.187	-52.461	4.292	0.532	q1_ao_1_e3_4_92_0039_55_0008_61_0015
-4725.3	2.617	-56.439	4.329	0.532	q1_ao_1_e3_5_2_0019_58_0009_62_0028
-4718.93	5.649	-47.319	4.26	0.532	q1_ao_1_e3_5_53_0030_61_0026_64_0035
-4722.44	4.111	-52.251	4.21	0.532	q1_ao_1_e3_5_7_0035_63_0009_67_0006
-4718.4	1.26	-57.442	4.22	0.532	q1_ao_1_e3_6_28_0008_67_0006_74_0010
-4715.42	2.849	-49.389	4.191	0.532	q1_ao_1_e3_6_29_0033_68_0008_75_0007
-4723.69	2.783	-57.226	4.227	0.532	q1_ao_1_e3_6_38_0024_69_0030_79_0019
-4721.26	2.586	-50.153	4.327	0.532	q1_ao_1_e3_6_40_0012_69_0005_80_0035
-4724.67	2.824	-57.943	4.339	0.532	q1_ao_1_e3_6_80_0007_74_0004_86_0027
-4720.48	3.274	-54.868	4.225	0.532	q1_ao_1_e3_6_80_0007_74_0011_86_0024
-4722.67	3.903	-47.548	4.207	0.532	q1_ao_1_e3_7_77_0038_82_0036_92_0012
-4720.88	3.715	-46.452	4.213	0.532	q1_ao_1_e3_7_77_0038_82_0036_92_0035
-4724.88	3.202	-53.642	4.215	0.532	q1_ao_1_e3_10_48_0036_6_0011_9_0025
-4718.6	3.383	-47.092	4.327	0.532	q1_ao_1_e3_10_48_0036_6_0027_9_0014
-4722.33	3.282	-51.319	4.312	0.532	q1_ao_1_e3_10_48_0036_6_0027_9_0028
-4723.93	3.749	-52.289	4.317	0.532	q1_ao_1_e3_10_69_0021_9_0018_14_0017_13_0002
-4727.12	3.716	-55.639	4.321	0.532	q1_ao_1_e3_10_69_0021_9_0018_14_0017_13_0006
-4726.27	3.956	-54.941	4.328	0.532	q1_ao_1_e3_10_69_0021_9_0018_14_0017_13_0009
-4728.46	3.742	-56.385	4.323	0.532	q1_ao_1_e3_10_69_0021_9_0018_14_0017_13_0030
-4726.08	3.502	-49.803	4.274	0.532	q1_ao_1_e3_10_7_0006_9_0017_15_0015_13_0026
-4719.54	3.174	-56.991	4.286	0.532	q1_ao_1_e3_10_82_0027_11_0011_19_0015_17_0003
-4715.14	3.084	-55.678	4.292	0.532	q1_ao_1_e3_10_82_0027_11_0011_19_0015_17_0033
-4719.57	3.153	-56.46	4.289	0.532	q1_ao_1_e3_10_82_0027_11_0011_19_0015_17_0037
-4719.81	3.223	-56.987	4.291	0.532	q1_ao_1_e3_10_82_0027_11_0011_19_0021_17_0024
-4717.38	3.109	-56.258	4.29	0.532	q1_ao_1_e3_10_82_0027_11_0011_19_0023_17_0019
-4717.05	3.117	-56.992	4.289	0.532	q1_ao_1_e3_10_82_0027_11_0011_19_0023_17_0021
-4719.21	3.118	-56.412	4.287	0.532	q1_ao_1_e3_10_82_0027_11_0011_19_0023_17_0023
-4715.53	3.227	-56.371	4.287	0.532	q1_ao_1_e3_10_82_0027_11_0011_19_0023_17_0039
-4719.1	3.127	-56.857	4.288	0.532	q1_ao_1_e3_10_82_0027_11_0011_19_0032_17_0003
-4718.77	3.173	-56.71	4.287	0.532	q1_ao_1_e3_10_82_0027_11_0011_19_0032_17_0021
-4718.79	3.159	-57.072	4.289	0.532	q1_ao_1_e3_10_82_0027_11_0011_19_0032_17_0030
-4718.66	3.082	-56.654	4.288	0.532	q1_ao_1_e3_10_82_0027_11_0011_19_0032_17_0031
-4717.99	3.167	-56.306	4.288	0.532	q1_ao_1_e3_10_82_0027_11_0011_19_0032_17_0039
-4717.34	4.234	-54.342	4.31	0.532	q1_ao_1_e3_10_87_0002_12_0023_19_0038_17_0003
-4721.69	4.101	-57.404	4.291	0.532	q1_ao_1_e3_10_87_0002_12_0023_19_0038_17_0015
-4715.69	4.548	-53.027	4.324	0.532	q1_ao_1_e3_10_87_0002_12_0023_19_0038_17_0040
-4714.42	3.258	-57.592	4.301	0.532	q1_ao_1_e3_10_87_0002_12_0032_19_0030_17_0020
-4719.64	3.189	-51.432	4.329	0.532	q1_ao_1_e3_10_92_0002_12_0037_19_0025_18_0033
-4726.72	3.362	-57.89	4.266	0.532	q1_ao_1_e3_10_34_0020_4_0016_4_0012_1_0004
-4726.61	3.364	-57.654	4.269	0.532	q1_ao_1_e3_10_34_0020_4_0016_4_0022_1_0007
-4725.26	2.697	-59.667	4.338	0.532	q1_ao_1_e3_2_14_0005_26_0001_32_0005_25_0020
-4721.37	2.576	-55.7	4.328	0.532	q1_ao_1_e3_2_14_0005_26_0029_33_0026_26_0005
-4721.55	2.618	-56.539	4.323	0.532	q1_ao_1_e3_2_14_0005_26_0029_33_0026_26_0008
-4718.52	2.804	-54.29	4.334	0.532	q1_ao_1_e3_2_14_0005_26_0029_33_0026_26_0009
-4724.57	2.686	-57.931	4.321	0.532	q1_ao_1_e3_2_14_0005_26_0029_33_0026_26_0031
-4722.72	2.64	-56.933	4.327	0.532	q1_ao_1_e3_2_14_0005_26_0029_33_0026_26_0038
-4716.64	3.07	-50.378	4.234	0.532	q1_ao_1_e3_2_16_0007_26_0002_33_0021_26_0010
-4723.3	2.827	-53.967	4.205	0.532	q1_ao_1_e3_2_16_0007_26_0002_33_0021_26_0017
-4721.94	2.659	-53.082	4.239	0.532	q1_ao_1_e3_2_16_0007_26_0002_33_0021_26_0030
-4721.83	3.297	-53.1	4.313	0.532	q1_ao_1_e3_10_34_0020_4_0039_4_0003_2_0002
-4720.12	3.323	-53.017	4.31	0.532	q1_ao_1_e3_10_34_0020_4_0039_4_0003_2_0005
-4727.2	3.323	-58.568	4.29	0.532	q1_ao_1_e3_10_34_0020_4_0039_4_0003_2_0014
-4727.31	3.339	-58.195	4.289	0.532	q1_ao_1_e3_10_34_0020_4_0039_4_0003_2_0018
-4722.57	3.211	-52.738	4.302	0.532	q1_ao_1_e3_10_34_0020_4_0039_4_0014_2_0005
-4723.48	3.244	-54.905	4.301	0.532	q1_ao_1_e3_10_34_0020_4_0039_4_0014_2_0011
-4724.19	3.227	-54.095	4.296	0.532	q1_ao_1_e3_10_34_0020_4_0039_4_0014_2_0019
-4724.27	3.29	-54.069	4.302	0.532	q1_ao_1_e3_10_34_0020_4_0039_4_0014_2_0023
-4725.24	3.29	-54.72	4.292	0.532	q1_ao_1_e3_10_34_0020_4_0039_4_0014_2_0024
-4720.81	3.261	-52.609	4.314	0.532	q1_ao_1_e3_10_34_0020_4_0039_4_0015_2_0008
-4722.87	3.378	-55.621	4.306	0.532	q1_ao_1_e3_10_34_0020_4_0039_4_0015_2_0012
-4722.1	3.305	-53.143	4.307	0.532	q1_ao_1_e3_10_34_0020_4_0039_4_0015_2_0015
-4720.69	3.331	-53.385	4.299	0.532	q1_ao_1_e3_10_34_0020_4_0039_4_0015_2_0020
-4728.15	3.266	-58.362	4.283	0.532	q1_ao_1_e3_10_34_0020_4_0039_4_0019_2_0009
-4724.2	3.29	-54.777	4.303	0.532	q1_ao_1_e3_10_34_0020_4_0039_4_0019_2_0010
-4725.32	3.296	-55.007	4.3	0.532	q1_ao_1_e3_10_34_0020_4_0039_4_0019_2_0011
-4725.24	3.379	-54.846	4.302	0.532	q1_ao_1_e3_10_34_0020_4_0039_4_0027_2_0017
-4725.74	3.387	-57.013	4.289	0.532	q1_ao_1_e3_10_34_0020_4_0039_4_0027_2_0020
-4722.71	3.319	-53.579	4.3	0.532	q1_ao_1_e3_10_34_0020_4_0039_4_0027_2_0024
-4723.78	3.334	-54.855	4.285	0.532	q1_ao_1_e3_10_34_0020_4_0039_4_0027_2_0026
-4725.43	3.22	-54.863	4.29	0.532	q1_ao_1_e3_10_34_0020_4_0039_4_0027_2_0028
-4716.66	2.415	-47.13	4.279	0.532	q1_ao_1_e3_2_50_0036_31_0001_36_0001_31_0004
-4715.93	2.566	-47.54	4.299	0.532	q1_ao_1_e3_2_50_0036_31_0001_36_0001_31_0037
-4710.27	2.539	-47.467	4.307	0.532	q1_ao_1_e3_2_50_0036_31_0016_37_0029_33_0008
-4714.81	2.603	-48.218	4.305	0.532	q1_ao_1_e3_2_50_0036_31_0016_37_0029_33_0025
-4713.02	3.472	-44.277	4.306	0.532	q1_ao_1_e3_2_50_0036_31_0020_37_0001_33_0006
-4720.49	2.702	-49.536	4.302	0.532	q1_ao_1_e3_2_50_0036_31_0024_37_0032_34_0002
-4722.48	2.714	-50.441	4.307	0.532	q1_ao_1_e3_2_50_0036_31_0024_37_0032_34_0020
-4720.9	2.755	-52.734	4.309	0.532	q1_ao_1_e3_2_50_0036_31_0024_37_0032_34_0035
-4717.49	3.449	-51.307	4.326	0.532	q1_ao_1_e3_3_16_0003_37_0002_41_0018_36_0001
-4724.17	3.784	-55.875	4.309	0.532	q1_ao_1_e3_3_16_0003_37_0002_41_0018_36_0005
-4720.51	3.762	-54.647	4.32	0.532	q1_ao_1_e3_3_16_0003_37_0002_41_0018_36_0009
-4718.24	3.443	-51.184	4.331	0.532	q1_ao_1_e3_3_16_0003_37_0002_41_0018_36_0022
-4717.55	3.474	-50.672	4.333	0.532	q1_ao_1_e3_3_16_0003_37_0002_41_0018_36_0026
-4716.28	3.54	-49.875	4.329	0.532	q1_ao_1_e3_3_16_0003_37_0002_41_0018_36_0032
-4721.71	3.757	-52.332	4.312	0.532	q1_ao_1_e3_3_16_0003_37_0002_41_0018_36_0038
-4712.73	3.255	-47.907	4.341	0.532	q1_ao_1_e3_3_16_0003_37_0021_41_0001_37_0018
-4723.91	3.271	-54.355	4.297	0.532	q1_ao_1_e3_10_34_0020_4_0039_4_0030_3_0006
-4721.19	3.272	-54.115	4.304	0.532	q1_ao_1_e3_10_34_0020_4_0039_4_0030_3_0010
-4721.45	3.287	-53.822	4.267	0.532	q1_ao_1_e3_10_34_0020_4_0039_4_0030_3_0011
-4726.87	3.322	-56.503	4.285	0.532	q1_ao_1_e3_10_34_0020_4_0039_4_0030_3_0028
-4723.86	3.267	-56.256	4.288	0.532	q1_ao_1_e3_10_34_0020_4_0039_4_0030_3_0031
-4712.91	3.95	-49.371	4.261	0.532	q1_ao_1_e3_3_59_0021_41_0020_47_0013_43_0007
-4721.39	3.413	-52.28	4.271	0.532	q1_ao_1_e3_3_59_0021_41_0020_47_0013_43_0021
-4722.48	3.344	-50.621	4.277	0.532	q1_ao_1_e3_3_59_0021_41_0020_47_0013_43_0036
-4721.86	3.288	-50.758	4.279	0.532	q1_ao_1_e3_3_59_0021_41_0020_47_0017_43_0020
-4721.78	3.577	-52.404	4.266	0.532	q1_ao_1_e3_3_59_0021_41_0020_47_0023_43_0021
-4722.29	3.488	-52.356	4.269	0.532	q1_ao_1_e3_3_59_0021_41_0020_47_0023_43_0031
-4722.1	3.549	-52.566	4.264	0.532	q1_ao_1_e3_3_59_0021_41_0020_47_0028_43_0004
-4718.38	3.833	-50.396	4.249	0.532	q1_ao_1_e3_3_59_0021_41_0020_47_0040_44_0011
-4719.27	3.749	-50.315	4.276	0.532	q1_ao_1_e3_3_59_0021_41_0020_47_0040_44_0023
-4728.77	3.295	-55.985	4.315	0.532	q1_ao_1_e3_10_4_0026_5_0003_6_0014_4_0035
-4720.82	3.773	-50.362	4.139	0.532	q1_ao_1_e3_4_23_0012_49_0015_57_0024_57_0006
-4721.79	4.258	-48.412	4.147	0.532	q1_ao_1_e3_4_23_0012_49_0015_57_0024_57_0014
-4719.89	3.781	-49.909	4.138	0.532	q1_ao_1_e3_4_23_0012_49_0015_57_0024_57_0015
-4720.98	3.708	-50.558	4.124	0.532	q1_ao_1_e3_4_23_0012_49_0015_57_0024_57_0023
-4716.8	3.774	-49.777	4.16	0.532	q1_ao_1_e3_4_23_0012_49_0015_57_0024_57_0025
-4720.55	3.945	-49.968	4.143	0.532	q1_ao_1_e3_4_23_0012_49_0015_57_0024_57_0032
-4719.09	4.064	-49.35	4.144	0.532	q1_ao_1_e3_4_23_0012_49_0015_57_0024_57_0035
-4721.32	4.059	-52.222	4.278	0.532	q1_ao_1_e3_4_92_0039_55_0008_61_0015_64_0014
-4724.82	3.879	-54.305	4.281	0.532	q1_ao_1_e3_4_92_0039_55_0008_61_0015_64_0018
-4716.02	4.386	-51.411	4.302	0.532	q1_ao_1_e3_4_92_0039_55_0008_61_0015_64_0033
-4718.7	4.258	-51.567	4.301	0.532	q1_ao_1_e3_4_92_0039_55_0008_61_0015_64_0039
-4723.1	4.024	-52.312	4.274	0.532	q1_ao_1_e3_4_92_0039_55_0008_61_0015_64_0040
-4720.56	3.558	-52.847	4.251	0.532	q1_ao_1_e3_5_53_0030_61_0026_64_0002_66_0001
-4727.26	3.535	-52.752	4.244	0.532	q1_ao_1_e3_5_53_0030_61_0026_64_0002_66_0009
-4719.22	5.559	-47.668	4.275	0.532	q1_ao_1_e3_5_53_0030_61_0026_64_0011_66_0001
-4718.74	5.598	-49.896	4.271	0.532	q1_ao_1_e3_5_53_0030_61_0026_64_0011_66_0002
-4719.02	5.581	-49.134	4.268	0.532	q1_ao_1_e3_5_53_0030_61_0026_64_0011_66_0021
-4717.32	3.689	-51.349	4.233	0.532	q1_ao_1_e3_5_53_0030_61_0026_64_0031_66_0026
-4724.14	4.103	-52.255	4.216	0.532	q1_ao_1_e3_5_7_0035_63_0009_67_0006_67_0024
-4714.18	3.842	-46.796	4.201	0.532	q1_ao_1_e3_5_7_0035_63_0009_67_0006_67_0026
-4723.38	4.192	-49.666	4.215	0.532	q1_ao_1_e3_5_7_0035_63_0009_67_0006_67_0038
-4720.68	3.74	-49.104	4.207	0.532	q1_ao_1_e3_5_7_0035_63_0009_67_0010_67_0005
-4720.86	3.993	-49.956	4.234	0.532	q1_ao_1_e3_5_7_0035_63_0009_67_0010_67_0019
-4716.91	3.626	-48.872	4.221	0.532	q1_ao_1_e3_5_7_0035_63_0009_67_0010_67_0030
-4720.53	4.088	-49.092	4.227	0.532	q1_ao_1_e3_5_7_0035_63_0009_67_0038_67_0003
-4720.87	3.999	-51.577	4.23	0.532	q1_ao_1_e3_5_7_0035_63_0009_67_0038_67_0016
-4722.4	3.903	-53.348	4.226	0.532	q1_ao_1_e3_5_7_0035_63_0009_67_0038_67_0033
-4718.37	3.806	-47.403	4.242	0.532	q1_ao_1_e3_5_7_0035_63_0009_67_0038_67_0037
-4726.72	3.083	-52.473	4.382	0.532	q1_ao_1_e3_5_75_0021_63_0031_68_0005_68_0014
-4716.23	3.789	-48.612	4.275	0.532	q1_ao_1_e3_5_83_0005_64_0014_69_0040_72_0009
-4721.73	1.442	-54.238	4.211	0.532	q1_ao_1_e3_6_15_0001_66_0008_73_0030_73_0021
-4719.31	1.991	-50.101	4.218	0.532	q1_ao_1_e3_6_15_0001_66_0020_73_0015_73_0013
-4720.08	2.004	-51.011	4.206	0.532	q1_ao_1_e3_6_15_0001_66_0033_73_0005_74_0014
-4723.12	1.208	-61.687	4.238	0.532	q1_ao_1_e3_6_28_0008_67_0006_74_0010_74_0004
-4725.07	1.175	-61.491	4.226	0.532	q1_ao_1_e3_6_28_0008_67_0006_74_0010_74_0022
-4722.21	2.855	-53.998	4.189	0.532	q1_ao_1_e3_6_29_0033_68_0008_75_0023_77_0040
-4718.91	2.809	-53.543	4.203	0.532	q1_ao_1_e3_6_29_0033_68_0008_75_0026_77_0023
-4719.06	2.808	-50.063	4.191	0.532	q1_ao_1_e3_6_29_0033_68_0008_75_0028_77_0001
-4723.08	2.9	-54.577	4.198	0.532	q1_ao_1_e3_6_29_0033_68_0008_75_0028_77_0029
-4719.72	3.381	-52.18	4.31	0.532	q1_ao_1_e3_10_43_0040_5_0034_9_0032_7_0026
-4719.38	3.348	-56.118	4.303	0.532	q1_ao_1_e3_10_43_0040_5_0034_9_0032_7_0034
-4710.52	3.537	-51.586	4.356	0.532	q1_ao_1_e3_10_43_0040_5_0034_9_0038_7_0027
-4714.47	3.442	-50.623	4.333	0.532	q1_ao_1_e3_10_43_0040_5_0034_9_0038_7_0036
-4707.17	3.476	-46.888	4.358	0.532	q1_ao_1_e3_10_43_0040_5_0034_9_0038_7_0039
-4722.18	3.901	-54.164	4.383	0.532	q1_ao_1_e3_10_45_0035_5_0028_9_0027_7_0019
-4727.34	3.244	-56.242	4.209	0.532	q1_ao_1_e3_10_48_0036_6_0011_9_0025_7_0001
-4725.67	3.202	-55.622	4.205	0.532	q1_ao_1_e3_10_48_0036_6_0011_9_0025_7_0003
-4724.37	3.232	-53.29	4.23	0.532	q1_ao_1_e3_10_48_0036_6_0011_9_0025_7_0005
-4724.32	3.244	-53.387	4.216	0.532	q1_ao_1_e3_10_48_0036_6_0011_9_0025_7_0019
-4725.94	3.214	-55.779	4.217	0.532	q1_ao_1_e3_10_48_0036_6_0011_9_0025_7_0029
-4718.66	4.139	-52.651	4.276	0.532	q1_ao_1_e3_6_38_0024_69_0030_79_0018_82_0003
-4729.73	2.852	-63.222	4.218	0.532	q1_ao_1_e3_6_38_0024_69_0030_79_0018_82_0029
-4718.85	4.208	-53.506	4.247	0.532	q1_ao_1_e3_6_38_0024_69_0030_79_0018_82_0031
-4718.14	2.714	-57.416	4.25	0.532	q1_ao_1_e3_6_38_0024_69_0030_79_0019_82_0001
-4719.41	2.51	-59.058	4.233	0.532	q1_ao_1_e3_6_38_0024_69_0030_79_0019_82_0010
-4725.95	2.93	-61.426	4.228	0.532	q1_ao_1_e3_6_38_0024_69_0030_79_0019_82_0030
-4719.97	2.791	-58.846	4.252	0.532	q1_ao_1_e3_6_38_0024_69_0030_79_0019_82_0038
-4720.86	2.571	-58.394	4.235	0.532	q1_ao_1_e3_6_38_0024_69_0030_79_0019_82_0039
-4722.01	3.851	-52.541	4.22	0.532	q1_ao_1_e3_6_38_0024_69_0030_79_0035_82_0003
-4724.55	3.647	-54.196	4.208	0.532	q1_ao_1_e3_6_38_0024_69_0030_79_0035_82_0007
-4724.31	3.712	-53.415	4.215	0.532	q1_ao_1_e3_6_38_0024_69_0030_79_0035_82_0012
-4724.74	3.713	-54.053	4.212	0.532	q1_ao_1_e3_6_38_0024_69_0030_79_0035_82_0018
-4721.86	3.799	-53.585	4.22	0.532	q1_ao_1_e3_6_38_0024_69_0030_79_0035_82_0027
-4725.28	3.651	-54.029	4.203	0.532	q1_ao_1_e3_6_38_0024_69_0030_79_0035_82_0035
-4712.61	2.412	-47.658	4.335	0.532	q1_ao_1_e3_6_40_0012_69_0005_80_0035_82_0032
-4717.27	2.478	-47.487	4.326	0.532	q1_ao_1_e3_6_40_0012_69_0005_80_0035_82_0040
-4724.09	3.881	-49.355	4.365	0.532	q1_ao_1_e3_6_41_0031_70_0018_80_0039_83_0013
-4725.32	3.821	-50.148	4.356	0.532	q1_ao_1_e3_6_41_0031_70_0018_80_0039_83_0018
-4719.84	2.372	-54.904	4.343	0.532	q1_ao_1_e3_6_80_0007_74_0004_86_0027_87_0017
-4718.7	2.806	-56.037	4.347	0.532	q1_ao_1_e3_6_80_0007_74_0004_86_0027_87_0030
-4721.06	2.252	-56.875	4.226	0.532	q1_ao_1_e3_6_80_0007_74_0011_86_0024_87_0018
-4722.19	2.762	-58.841	4.347	0.532	q1_ao_1_e3_6_80_0007_74_0031_86_0027_87_0025
-4723.05	2.959	-60.882	4.33	0.532	q1_ao_1_e3_6_80_0007_74_0031_86_0027_87_0029
-4722.04	3.073	-58.796	4.34	0.532	q1_ao_1_e3_6_80_0007_74_0031_86_0027_87_0033
-4719.65	2.849	-57.506	4.314	0.532	q1_ao_1_e3_6_80_0007_74_0031_86_0027_87_0034
-4719.24	3.179	-52.909	4.244	0.532	q1_ao_1_e3_10_48_0036_6_0011_9_0032_8_0031
-4719.9	3.34	-47.795	4.306	0.532	q1_ao_1_e3_10_48_0036_6_0027_9_0008_8_0032
-4722.75	3.343	-51.436	4.324	0.532	q1_ao_1_e3_10_48_0036_6_0027_9_0028_8_0001
-4717.06	3.323	-48.366	4.319	0.532	q1_ao_1_e3_10_48_0036_6_0027_9_0028_8_0028
-4721.01	1.347	-58.953	4.244	0.532	q1_ao_1_e3_7_77_0038_82_0028_92_0017_94_0013
-4730.07	1.29	-65.4	4.218	0.532	q1_ao_1_e3_7_77_0038_82_0028_92_0017_94_0029
-4727.87	1.422	-62.748	4.214	0.532	q1_ao_1_e3_7_77_0038_82_0028_92_0019_94_0008
-4717.49	3.018	-50.935	4.266	0.532	q1_ao_1_e3_8_2_0023_85_0003_94_0029_95_0012
-4722.04	3.726	-44.726	4.305	0.519	q1_ao_1_e3_10_91_0016_12_0036
-4720.8	4.521	-45.162	4.313	0.519	q1_ao_1_e3_10_93_0017_12_0001
-4724.68	4.271	-52.459	4.306	0.519	q1_ao_1_e3_3_11_0002_36_0021
-4719.9	2.611	-54.958	4.209	0.519	q1_ao_1_e3_3_26_0040_38_0035
-4724.16	3.329	-52.757	4.29	0.519	q1_ao_1_e3_10_34_0020_4_0039
-4716.51	4.498	-45.542	4.251	0.519	q1_ao_1_e3_4_56_0026_52_0017
-4720	4.887	-45.577	4.206	0.519	q1_ao_1_e3_4_56_0026_52_0028
-4720.26	3.802	-52.506	4.206	0.519	q1_ao_1_e3_5_7_0035_63_0009
-4723.35	4.215	-49.372	4.264	0.519	q1_ao_1_e3_6_38_0024_69_0030
-4720.29	2.512	-49.225	4.322	0.519	q1_ao_1_e3_6_40_0012_69_0005
-4718.15	3.274	-49.898	4.258	0.519	q1_ao_1_e3_10_48_0036_6_0011
-4725.61	3.477	-54.556	4.249	0.519	q1_ao_1_e3_10_7_0006_9_0019
-4719.61	6.384	-42.744	4.309	0.519	q1_ao_1_e3_10_7_0024_9_0027
-4719.82	3.414	-49.162	4.259	0.519	q1_ao_1_e3_10_7_0006_9_0019_15_0018
-4719.53	3.379	-50.403	4.271	0.519	q1_ao_1_e3_10_7_0006_9_0019_15_0034
-4721.22	3.448	-50.206	4.265	0.519	q1_ao_1_e3_10_7_0006_9_0019_15_0037
-4722.38	3.403	-51.468	4.253	0.519	q1_ao_1_e3_10_7_0006_9_0019_15_0038
-4722.02	3.402	-52.579	4.253	0.519	q1_ao_1_e3_10_7_0006_9_0019_15_0040
-4718.14	3.388	-53.034	4.278	0.519	q1_ao_1_e3_10_82_0027_11_0011_19_0032
-4708.53	3.429	-48.057	4.298	0.519	q1_ao_1_e3_10_82_0027_11_0016_19_0026
-4719.45	3.937	-53.841	4.298	0.519	q1_ao_1_e3_10_87_0002_12_0023_19_0038
-4716.29	2.925	-47.673	4.294	0.519	q1_ao_1_e3_1_28_0031_16_0016_24_0026
-4715.17	2.952	-46.753	4.295	0.519	q1_ao_1_e3_1_28_0031_16_0038_24_0028
-4716.63	2.921	-51.058	4.302	0.519	q1_ao_1_e3_2_50_0033_31_0017_36_0032
-4718.65	2.953	-49.713	4.293	0.519	q1_ao_1_e3_2_50_0036_31_0001_36_0001
-4716.56	4.108	-48.49	4.329	0.519	q1_ao_1_e3_2_50_0036_31_0014_37_0040
-4713.86	3.197	-51.869	4.342	0.519	q1_ao_1_e3_2_50_0036_31_0016_37_0001
-4717.98	4.196	-48.251	4.312	0.519	q1_ao_1_e3_3_11_0002_36_0021_40_0011
-4719.73	3.142	-55.444	4.307	0.519	q1_ao_1_e3_3_66_0034_43_0001_49_0018
-4718.27	3.169	-52.204	4.319	0.519	q1_ao_1_e3_3_66_0034_43_0018_49_0034
-4725.15	5.69	-52.613	4.291	0.519	q1_ao_1_e3_10_34_0020_4_0034_4_0037
-4721.34	3.352	-50.33	4.308	0.519	q1_ao_1_e3_10_34_0020_4_0039_4_0015
-4718.93	2.86	-49.246	4.299	0.519	q1_ao_1_e3_3_93_0040_46_0007_54_0032
-4719.72	3.279	-49.72	4.19	0.519	q1_ao_1_e3_4_14_0023_48_0005_56_0035
-4719.68	3.604	-49.147	4.139	0.519	q1_ao_1_e3_4_23_0012_49_0015_57_0004
-4719.72	4.221	-47.257	4.142	0.519	q1_ao_1_e3_4_23_0012_49_0024_57_0010
-4714.66	4.316	-47.376	4.235	0.519	q1_ao_1_e3_4_62_0008_53_0030_59_0010
-4714.58	4.304	-45.305	4.235	0.519	q1_ao_1_e3_4_62_0008_53_0030_59_0019
-4714.09	4.215	-45.875	4.224	0.519	q1_ao_1_e3_4_62_0008_53_0030_59_0031
-4726.95	3.848	-53.109	4.243	0.519	q1_ao_1_e3_5_53_0030_61_0026_64_0002
-4720.97	5.647	-50.177	4.258	0.519	q1_ao_1_e3_5_53_0030_61_0026_64_0011
-4718.41	5.633	-46.669	4.255	0.519	q1_ao_1_e3_5_53_0030_61_0026_64_0019
-4719.28	4.198	-48.641	4.233	0.519	q1_ao_1_e3_5_7_0035_63_0009_67_0012
-4717.78	3.918	-48.249	4.227	0.519	q1_ao_1_e3_5_7_0035_63_0009_67_0019
-4725.39	3.893	-52.128	4.216	0.519	q1_ao_1_e3_5_7_0035_63_0009_67_0038
-4701.72	4.333	-46.502	4.237	0.519	q1_ao_1_e3_5_83_0005_64_0027_70_0005
-4722.61	3.533	-52.382	4.313	0.519	q1_ao_1_e3_6_28_0008_67_0008_74_0018
-4717.99	3.504	-43.681	4.262	0.519	q1_ao_1_e3_7_93_0014_83_0032_93_0009
-4715.26	3.398	-51.987	4.325	0.519	q1_ao_1_e3_10_43_0040_5_0034_9_0032
-4721.91	3.234	-52.659	4.241	0.519	q1_ao_1_e3_10_48_0036_6_0011_9_0004
-4721.3	3.155	-51.53	4.246	0.519	q1_ao_1_e3_10_48_0036_6_0011_9_0012
-4718.38	3.063	-50.514	4.259	0.519	q1_ao_1_e3_10_48_0036_6_0011_9_0032
-4722.22	3.355	-50.974	4.3	0.519	q1_ao_1_e3_10_48_0036_6_0027_9_0008
-4717.35	3.356	-48.25	4.311	0.519	q1_ao_1_e3_10_48_0036_6_0027_9_0025
-4718.17	3.444	-47.115	4.332	0.519	q1_ao_1_e3_10_48_0036_6_0027_9_0033
-4720.87	3.693	-51.278	4.358	0.519	q1_ao_1_e3_10_69_0021_9_0018_14_0017_13_0008
-4723.73	3.68	-52.527	4.344	0.519	q1_ao_1_e3_10_69_0021_9_0018_14_0017_13_0029
-4719.42	3.889	-49.928	4.358	0.519	q1_ao_1_e3_10_69_0021_9_0018_14_0017_13_0031
-4723.95	3.806	-52.134	4.347	0.519	q1_ao_1_e3_10_69_0021_9_0018_14_0017_13_0036
-4721.07	3.414	-50.689	4.266	0.519	q1_ao_1_e3_10_7_0006_9_0019_15_0034_13_0016
-4721.86	3.471	-49.997	4.265	0.519	q1_ao_1_e3_10_7_0006_9_0019_15_0034_13_0017
-4722.34	3.424	-50.875	4.255	0.519	q1_ao_1_e3_10_7_0006_9_0019_15_0034_13_0040
-4720.78	3.44	-49.778	4.257	0.519	q1_ao_1_e3_10_7_0006_9_0019_15_0037_13_0002
-4725.5	3.478	-55.505	4.242	0.519	q1_ao_1_e3_10_7_0006_9_0019_15_0037_13_0007
-4720.08	3.424	-50.509	4.264	0.519	q1_ao_1_e3_10_7_0006_9_0019_15_0037_13_0023
-4720.14	3.41	-50.541	4.263	0.519	q1_ao_1_e3_10_7_0006_9_0019_15_0037_13_0032
-4721.49	3.405	-51.356	4.258	0.519	q1_ao_1_e3_10_7_0006_9_0019_15_0037_13_0038
-4722.87	3.388	-52.141	4.247	0.519	q1_ao_1_e3_10_7_0006_9_0019_15_0037_13_0039
-4721.19	3.448	-50.882	4.268	0.519	q1_ao_1_e3_10_7_0006_9_0019_15_0037_13_0040
-4722.48	3.413	-51.324	4.261	0.519	q1_ao_1_e3_10_7_0006_9_0019_15_0040_14_0002
-4726.18	3.431	-54.865	4.271	0.519	q1_ao_1_e3_10_7_0006_9_0019_15_0040_14_0005
-4714.82	6.043	-42.914	4.345	0.519	q1_ao_1_e3_10_7_0006_9_0019_15_0040_14_0018
-4721.49	3.416	-50.983	4.259	0.519	q1_ao_1_e3_10_7_0006_9_0019_15_0040_14_0029
-4725.31	3.366	-54.854	4.25	0.519	q1_ao_1_e3_10_7_0006_9_0019_15_0040_14_0031
-4721.03	3.347	-50.307	4.264	0.519	q1_ao_1_e3_10_7_0006_9_0019_15_0040_14_0035
-4725.86	3.45	-50.163	4.275	0.519	q1_ao_1_e3_10_7_0006_9_0038_15_0003_14_0021
-4727.15	4.656	-53.339	4.277	0.519	q1_ao_1_e3_10_7_0006_9_0038_15_0010_14_0027
-4713.71	3.088	-55.647	4.293	0.519	q1_ao_1_e3_10_82_0027_11_0011_19_0021_17_0011
-4715.01	3.056	-55.956	4.292	0.519	q1_ao_1_e3_10_82_0027_11_0011_19_0021_17_0012
-4716.69	3.236	-57.997	4.293	0.519	q1_ao_1_e3_10_82_0027_11_0011_19_0021_17_0027
-4716.47	3.409	-55.855	4.293	0.519	q1_ao_1_e3_10_82_0027_11_0011_19_0021_17_0040
-4713.96	3.037	-55.458	4.299	0.519	q1_ao_1_e3_10_82_0027_11_0011_19_0032_17_0034
-4721.47	4.022	-56.986	4.28	0.519	q1_ao_1_e3_10_87_0002_12_0023_19_0038_17_0001
-4713.11	4.502	-51.607	4.321	0.519	q1_ao_1_e3_10_87_0002_12_0023_19_0038_17_0023
-4718.22	4.297	-55.748	4.31	0.519	q1_ao_1_e3_10_87_0002_12_0023_19_0038_17_0024
-4718.39	3.303	-54.108	4.283	0.519	q1_ao_1_e3_10_87_0002_12_0032_19_0030_17_0003
-4717.97	3.186	-56.436	4.284	0.519	q1_ao_1_e3_10_87_0002_12_0032_19_0030_17_0028
-4726.14	3.386	-55.691	4.265	0.519	q1_ao_1_e3_10_93_0017_12_0019_20_0004_19_0040
-4723.28	3.389	-54.117	4.266	0.519	q1_ao_1_e3_10_34_0020_4_0016_4_0012_1_0008
-4725.43	3.409	-55.471	4.262	0.519	q1_ao_1_e3_10_34_0020_4_0016_4_0012_1_0026
-4721.69	3.396	-51.907	4.262	0.519	q1_ao_1_e3_10_34_0020_4_0016_4_0012_1_0033
-4725.59	3.492	-54.511	4.251	0.519	q1_ao_1_e3_10_34_0020_4_0016_4_0012_1_0034
-4724.32	3.46	-56.784	4.257	0.519	q1_ao_1_e3_10_34_0020_4_0016_4_0022_1_0004
-4726.73	3.441	-57.595	4.256	0.519	q1_ao_1_e3_10_34_0020_4_0016_4_0028_1_0009
-4727.39	3.436	-57.833	4.256	0.519	q1_ao_1_e3_10_34_0020_4_0016_4_0028_1_0014
-4726.66	3.425	-57.396	4.26	0.519	q1_ao_1_e3_10_34_0020_4_0016_4_0028_1_0019
-4725.88	3.495	-55.114	4.253	0.519	q1_ao_1_e3_10_34_0020_4_0016_4_0028_1_0022
-4726.85	3.505	-57.793	4.259	0.519	q1_ao_1_e3_10_34_0020_4_0016_4_0028_1_0037
-4723.41	3.401	-54.447	4.265	0.519	q1_ao_1_e3_10_34_0020_4_0016_4_0028_1_0038
-4726.38	3.442	-57.215	4.262	0.519	q1_ao_1_e3_10_34_0020_4_0016_4_0028_1_0039
-4721.83	3.385	-51.916	4.262	0.519	q1_ao_1_e3_10_34_0020_4_0016_4_0033_1_0037
-4728.39	3.428	-58.565	4.26	0.519	q1_ao_1_e3_10_93_0017_12_0019_20_0035_20_0002
-4725.9	3.31	-55.524	4.27	0.519	q1_ao_1_e3_10_93_0017_12_0019_20_0035_20_0004
-4722.23	3.424	-53.301	4.28	0.519	q1_ao_1_e3_10_93_0017_12_0019_20_0035_20_0013
-4722.74	2.043	-58.418	4.277	0.519	q1_ao_1_e3_1_73_0003_21_0001_26_0032_23_0030
-4723.28	2.664	-53.953	4.22	0.519	q1_ao_1_e3_2_16_0007_26_0002_33_0021_26_0002
-4724.12	2.709	-54.148	4.241	0.519	q1_ao_1_e3_2_16_0007_26_0002_33_0021_26_0003
-4710.44	4.98	-46.165	4.305	0.519	q1_ao_1_e3_2_2_0032_27_0035_33_0004_26_0040
-4725.99	3.319	-55.474	4.293	0.519	q1_ao_1_e3_10_34_0020_4_0039_4_0003_2_0011
-4723.76	3.225	-56.571	4.293	0.519	q1_ao_1_e3_10_34_0020_4_0039_4_0003_2_0021
-4726.22	3.343	-57.24	4.29	0.519	q1_ao_1_e3_10_34_0020_4_0039_4_0014_2_0027
-4728.52	3.377	-58.99	4.286	0.519	q1_ao_1_e3_10_34_0020_4_0039_4_0015_2_0011
-4728.32	3.346	-58.749	4.285	0.519	q1_ao_1_e3_10_34_0020_4_0039_4_0015_2_0024
-4726.2	3.376	-56.52	4.298	0.519	q1_ao_1_e3_10_34_0020_4_0039_4_0019_2_0008
-4724.06	3.296	-54.649	4.295	0.519	q1_ao_1_e3_10_34_0020_4_0039_4_0019_2_0024
-4724.4	3.337	-57.091	4.258	0.519	q1_ao_1_e3_10_34_0020_4_0039_4_0027_2_0015
-4700.26	4.054	-37.874	4.309	0.519	q1_ao_1_e3_2_50_0033_31_0017_36_0025_30_0029
-4711.3	2.581	-46.06	4.311	0.519	q1_ao_1_e3_2_50_0036_31_0014_37_0024_32_0020
-4710.63	2.744	-52.472	4.328	0.519	q1_ao_1_e3_2_50_0036_31_0016_37_0001_33_0027
-4716.32	3.159	-53.145	4.356	0.519	q1_ao_1_e3_2_50_0036_31_0020_37_0036_33_0036
-4720.57	4.217	-53.233	4.306	0.519	q1_ao_1_e3_3_11_0002_36_0021_40_0002_35_0009
-4725.51	3.822	-54.607	4.257	0.519	q1_ao_1_e3_3_11_0002_36_0021_40_0004_35_0002
-4722.9	4.067	-54.802	4.266	0.519	q1_ao_1_e3_3_11_0002_36_0021_40_0004_35_0017
-4723.65	4.051	-55.016	4.29	0.519	q1_ao_1_e3_3_11_0002_36_0021_40_0004_35_0040
-4719.98	3.273	-52.253	4.315	0.519	q1_ao_1_e3_3_16_0003_37_0002_41_0018_36_0014
-4721.94	3.07	-53.724	4.298	0.519	q1_ao_1_e3_3_16_0003_37_0002_41_0018_36_0023
-4719.42	3.726	-52.054	4.317	0.519	q1_ao_1_e3_3_16_0003_37_0002_41_0018_36_0025
-4715.68	3.811	-50.272	4.334	0.519	q1_ao_1_e3_3_16_0003_37_0002_41_0018_36_0028
-4702.61	3.294	-47.899	4.382	0.519	q1_ao_1_e3_3_16_0003_37_0002_41_0030_36_0032
-4714.74	3.528	-49.297	4.3	0.519	q1_ao_1_e3_3_16_0003_37_0018_41_0032_36_0008
-4713.1	3.378	-46.4	4.278	0.519	q1_ao_1_e3_3_16_0003_37_0018_41_0040_37_0021
-4712.34	2.983	-47.702	4.307	0.519	q1_ao_1_e3_3_16_0003_37_0018_41_0040_37_0028
-4718.74	3.902	-53.763	4.324	0.519	q1_ao_1_e3_3_16_0003_37_0021_41_0001_37_0030
-4721.15	3.285	-53.422	4.305	0.519	q1_ao_1_e3_10_34_0020_4_0039_4_0030_3_0004
-4728.16	3.342	-57.485	4.293	0.519	q1_ao_1_e3_10_34_0020_4_0039_4_0030_3_0007
-4726.3	3.343	-55.621	4.29	0.519	q1_ao_1_e3_10_34_0020_4_0039_4_0030_3_0029
-4717.4	3.91	-50.704	4.262	0.519	q1_ao_1_e3_3_59_0021_41_0020_47_0023_43_0007
-4722.09	3.517	-52.355	4.28	0.519	q1_ao_1_e3_3_59_0021_41_0020_47_0040_44_0013
-4723.19	3.333	-52.764	4.271	0.519	q1_ao_1_e3_3_59_0021_41_0020_47_0040_44_0035
-4713.98	3.675	-41.586	4.31	0.519	q1_ao_1_e3_3_93_0040_46_0006_54_0038_50_0030
-4713.12	2.803	-45.825	4.293	0.519	q1_ao_1_e3_3_93_0040_46_0010_54_0007_52_0036
-4717.92	3.321	-46.215	4.264	0.519	q1_ao_1_e3_3_93_0040_46_0012_54_0027_52_0034
-4716.5	3.295	-48.453	4.303	0.519	q1_ao_1_e3_3_93_0040_46_0038_55_0018_54_0022
-4718.57	3.31	-49.53	4.203	0.519	q1_ao_1_e3_4_14_0023_48_0005_56_0035_56_0001
-4717.41	3.135	-48.875	4.194	0.519	q1_ao_1_e3_4_14_0023_48_0005_56_0035_56_0013
-4715.29	4.114	-50.991	4.157	0.519	q1_ao_1_e3_4_23_0012_49_0015_57_0024_57_0007
-4730.1	2.426	-61.788	4.327	0.519	q1_ao_1_e3_5_2_0019_58_0006_62_0033_65_0004
-4724.64	3.273	-50.72	4.235	0.519	q1_ao_1_e3_5_53_0030_61_0026_64_0002_66_0033
-4726.02	3.844	-54.954	4.257	0.519	q1_ao_1_e3_5_53_0030_61_0026_64_0002_66_0040
-4720.89	5.546	-50.366	4.259	0.519	q1_ao_1_e3_5_53_0030_61_0026_64_0011_66_0014
-4723.36	5.533	-50.503	4.249	0.519	q1_ao_1_e3_5_53_0030_61_0026_64_0031_66_0004
-4722.45	5.554	-50.518	4.255	0.519	q1_ao_1_e3_5_53_0030_61_0026_64_0031_66_0008
-4720.32	5.64	-49.315	4.265	0.519	q1_ao_1_e3_5_53_0030_61_0026_64_0031_66_0014
-4718.56	5.558	-47.836	4.278	0.519	q1_ao_1_e3_5_53_0030_61_0026_64_0031_66_0016
-4721.13	3.593	-53.116	4.244	0.519	q1_ao_1_e3_5_53_0030_61_0026_64_0031_66_0036
-4725.06	3.588	-55.293	4.237	0.519	q1_ao_1_e3_5_53_0030_61_0026_64_0033_66_0007
-4722.64	5.551	-50.543	4.255	0.519	q1_ao_1_e3_5_53_0030_61_0026_64_0033_66_0026
-4723.4	3.826	-48.592	4.221	0.519	q1_ao_1_e3_5_7_0035_63_0009_67_0006_67_0008
-4719.52	3.904	-49.845	4.243	0.519	q1_ao_1_e3_5_7_0035_63_0009_67_0006_67_0014
-4721.47	4.362	-50.695	4.218	0.519	q1_ao_1_e3_5_7_0035_63_0009_67_0006_67_0016
-4726.99	3.746	-55.822	4.219	0.519	q1_ao_1_e3_5_7_0035_63_0009_67_0010_67_0016
-4720.8	3.945	-49.574	4.227	0.519	q1_ao_1_e3_5_7_0035_63_0009_67_0010_67_0023
-4714.62	4.058	-49.694	4.228	0.519	q1_ao_1_e3_5_7_0035_63_0009_67_0010_67_0025
-4722.69	3.929	-51.569	4.231	0.519	q1_ao_1_e3_5_7_0035_63_0009_67_0010_67_0032
-4720.19	3.782	-51.778	4.234	0.519	q1_ao_1_e3_5_7_0035_63_0009_67_0010_67_0033
-4721.22	3.987	-53.733	4.201	0.519	q1_ao_1_e3_5_7_0035_63_0009_67_0010_67_0040
-4725.1	3.834	-50.876	4.221	0.519	q1_ao_1_e3_5_7_0035_63_0009_67_0038_67_0001
-4720.65	3.848	-52.01	4.221	0.519	q1_ao_1_e3_5_7_0035_63_0009_67_0038_67_0017
-4725.87	3.874	-54.643	4.216	0.519	q1_ao_1_e3_5_7_0035_63_0009_67_0038_67_0026
-4718.06	4.2	-44.932	4.241	0.519	q1_ao_1_e3_5_7_0035_63_0009_67_0038_67_0034
-4721.28	3.906	-48.684	4.209	0.519	q1_ao_1_e3_5_7_0035_63_0009_67_0038_67_0040
-4721.99	2.943	-51.092	4.36	0.519	q1_ao_1_e3_5_75_0021_63_0002_68_0008_68_0037
-4721.38	2.922	-52.367	4.405	0.519	q1_ao_1_e3_10_42_0035_5_0015_8_0006_6_0004
-4719.73	2.997	-54.062	4.406	0.519	q1_ao_1_e3_10_42_0035_5_0015_8_0013_6_0012
-4716.58	2.714	-46.726	4.241	0.519	q1_ao_1_e3_5_80_0023_64_0028_68_0025_70_0034
-4717.2	2.235	-51.75	4.23	0.519	q1_ao_1_e3_5_83_0005_64_0007_69_0038_71_0036
-4712.13	3.331	-47.756	4.223	0.519	q1_ao_1_e3_6_28_0008_67_0028_74_0018_76_0031
-4719.56	3.203	-51.72	4.31	0.519	q1_ao_1_e3_6_28_0008_67_0028_74_0027_76_0037
-4706.98	2.761	-51.568	4.155	0.519	q1_ao_1_e3_6_29_0033_68_0008_75_0028_77_0021
-4721.62	2.99	-53.481	4.354	0.519	q1_ao_1_e3_10_42_0035_5_0015_8_0040_7_0008
-4715.68	3.36	-54.518	4.334	0.519	q1_ao_1_e3_10_43_0040_5_0034_9_0032_7_0011
-4713.46	3.338	-54.339	4.339	0.519	q1_ao_1_e3_10_43_0040_5_0034_9_0032_7_0025
-4720.05	3.326	-55.612	4.305	0.519	q1_ao_1_e3_10_43_0040_5_0034_9_0032_7_0031
-4719.77	3.325	-57.719	4.3	0.519	q1_ao_1_e3_10_43_0040_5_0034_9_0032_7_0037
-4709.75	3.421	-50.09	4.354	0.519	q1_ao_1_e3_10_43_0040_5_0034_9_0038_7_0014
-4708.6	3.391	-49.029	4.357	0.519	q1_ao_1_e3_10_43_0040_5_0034_9_0038_7_0030
-4709.33	3.49	-48.999	4.365	0.519	q1_ao_1_e3_10_43_0040_5_0034_9_0038_7_0034
-4721.56	3.206	-51.766	4.236	0.519	q1_ao_1_e3_10_48_0036_6_0011_9_0004_7_0002
-4720.11	3.192	-51.723	4.245	0.519	q1_ao_1_e3_10_48_0036_6_0011_9_0004_7_0011
-4718.77	3.212	-52.207	4.264	0.519	q1_ao_1_e3_10_48_0036_6_0011_9_0004_7_0013
-4726.03	3.388	-57.435	4.238	0.519	q1_ao_1_e3_10_48_0036_6_0011_9_0004_7_0016
-4717.32	3.198	-50.223	4.252	0.519	q1_ao_1_e3_10_48_0036_6_0011_9_0004_7_0020
-4727.95	3.284	-59.124	4.244	0.519	q1_ao_1_e3_10_48_0036_6_0011_9_0004_7_0022
-4717.4	3.178	-48.938	4.246	0.519	q1_ao_1_e3_10_48_0036_6_0011_9_0004_7_0025
-4723.06	3.276	-55.882	4.257	0.519	q1_ao_1_e3_10_48_0036_6_0011_9_0009_7_0012
-4728.24	3.426	-58.976	4.254	0.519	q1_ao_1_e3_10_48_0036_6_0011_9_0009_7_0024
-4722.65	3.236	-52.527	4.246	0.519	q1_ao_1_e3_10_48_0036_6_0011_9_0012_7_0012
-4718.32	3.129	-48.603	4.261	0.519	q1_ao_1_e3_10_48_0036_6_0011_9_0012_7_0022
-4721.18	3.183	-51.93	4.246	0.519	q1_ao_1_e3_10_48_0036_6_0011_9_0012_7_0036
-4729.48	3.667	-55.653	4.221	0.519	q1_ao_1_e3_6_38_0024_69_0030_79_0004_82_0001
-4725.94	3.905	-55.62	4.226	0.519	q1_ao_1_e3_6_38_0024_69_0030_79_0004_82_0003
-4727.75	3.841	-55.575	4.224	0.519	q1_ao_1_e3_6_38_0024_69_0030_79_0004_82_0009
-4727.43	3.806	-55.934	4.219	0.519	q1_ao_1_e3_6_38_0024_69_0030_79_0004_82_0012
-4728.49	3.747	-55.89	4.222	0.519	q1_ao_1_e3_6_38_0024_69_0030_79_0004_82_0021
-4729.52	3.694	-56.29	4.215	0.519	q1_ao_1_e3_6_38_0024_69_0030_79_0004_82_0022
-4730.07	3.769	-56.551	4.228	0.519	q1_ao_1_e3_6_38_0024_69_0030_79_0004_82_0025
-4727.94	3.897	-55.802	4.22	0.519	q1_ao_1_e3_6_38_0024_69_0030_79_0004_82_0027
-4728	3.843	-55.74	4.222	0.519	q1_ao_1_e3_6_38_0024_69_0030_79_0004_82_0037
-4727.52	3.793	-54.791	4.222	0.519	q1_ao_1_e3_6_38_0024_69_0030_79_0004_82_0040
-4725.84	3.596	-57.871	4.26	0.519	q1_ao_1_e3_6_38_0024_69_0030_79_0018_82_0009
-4719.91	4.209	-53.448	4.285	0.519	q1_ao_1_e3_6_38_0024_69_0030_79_0018_82_0025
-4724.35	3.802	-52.119	4.224	0.519	q1_ao_1_e3_6_38_0024_69_0030_79_0035_82_0011
-4725.59	3.809	-54.283	4.216	0.519	q1_ao_1_e3_6_38_0024_69_0030_79_0035_82_0031
-4722.95	3.889	-50.412	4.373	0.519	q1_ao_1_e3_6_41_0031_70_0018_80_0039_83_0012
-4715.07	2.544	-52.923	4.342	0.519	q1_ao_1_e3_6_80_0007_74_0004_86_0027_87_0037
-4725.45	2.494	-56.359	4.194	0.519	q1_ao_1_e3_6_80_0007_74_0004_86_0032_87_0037
-4717.74	3.178	-50.404	4.255	0.519	q1_ao_1_e3_10_48_0036_6_0011_9_0032_8_0002
-4720.28	3.167	-51.653	4.236	0.519	q1_ao_1_e3_10_48_0036_6_0011_9_0032_8_0005
-4720.67	3.121	-51.626	4.249	0.519	q1_ao_1_e3_10_48_0036_6_0011_9_0032_8_0006
-4718.75	3.255	-49.38	4.254	0.519	q1_ao_1_e3_10_48_0036_6_0011_9_0032_8_0040
-4720.78	3.391	-52.727	4.256	0.519	q1_ao_1_e3_10_48_0036_6_0011_9_0036_8_0009
-4718.42	3.19	-49.674	4.258	0.519	q1_ao_1_e3_10_48_0036_6_0011_9_0036_8_0033
-4719.34	3.355	-49.037	4.307	0.519	q1_ao_1_e3_10_48_0036_6_0027_9_0008_8_0003
-4722.64	3.398	-51.202	4.296	0.519	q1_ao_1_e3_10_48_0036_6_0027_9_0008_8_0040
-4720.1	3.368	-49.406	4.301	0.519	q1_ao_1_e3_10_48_0036_6_0027_9_0028_8_0007
-4718.03	3.388	-48.236	4.316	0.519	q1_ao_1_e3_10_48_0036_6_0027_9_0028_8_0031
-4717.29	4.688	-48.113	4.331	0.519	q1_ao_1_e3_7_48_0007_79_0031_90_0033_92_0007
-4719.01	4.597	-48.605	4.328	0.519	q1_ao_1_e3_7_48_0007_79_0031_90_0033_92_0019
-4720.7	4.634	-47.627	4.336	0.519	q1_ao_1_e3_7_48_0007_79_0031_90_0033_92_0023
-4716.98	4.583	-47.056	4.351	0.519	q1_ao_1_e3_7_48_0007_79_0031_90_0033_92_0027
-4719.19	4.589	-48.681	4.341	0.519	q1_ao_1_e3_7_48_0007_79_0031_90_0033_92_0039
-4716.56	4.459	-45.741	4.238	0.519	q1_ao_1_e3_7_93_0014_83_0013_93_0040_94_0012
-4729.33	3.39	-58.606	4.243	0.506	q1_ao_1_e3_10_93_0017_12_0019
-4709.35	3.374	-46.791	4.329	0.506	q1_ao_1_e3_1_73_0003_21_0001
-4713.52	6.304	-43.239	4.221	0.506	q1_ao_1_e3_3_26_0040_38_0025
-4719.45	5.525	-46.114	4.238	0.506	q1_ao_1_e3_5_53_0030_61_0026
-4717.14	6.079	-47.346	4.294	0.506	q1_ao_1_e3_10_56_0034_7_0009
-4721.05	4.605	-48.426	4.303	0.506	q1_ao_1_e3_10_57_0040_7_0007
-4720.07	4.321	-50.03	4.288	0.506	q1_ao_1_e3_10_69_0021_9_0018
-4722.14	3.569	-47.01	4.359	0.506	q1_ao_1_e3_10_7_0006_9_0017
-4723.28	4.594	-49.415	4.282	0.506	q1_ao_1_e3_10_57_0040_7_0019_12_0004
-4720.54	4.633	-47.503	4.286	0.506	q1_ao_1_e3_10_57_0040_7_0019_12_0006
-4720.41	3.341	-59.381	4.286	0.506	q1_ao_1_e3_10_82_0027_11_0011_19_0020
-4717.23	3.276	-54.554	4.283	0.506	q1_ao_1_e3_10_82_0027_11_0011_19_0021
-4714.66	3.311	-51.713	4.277	0.506	q1_ao_1_e3_10_82_0027_11_0011_19_0023
-4726.38	3.397	-57.078	4.255	0.506	q1_ao_1_e3_10_93_0017_12_0019_20_0003
-4726.62	3.415	-56.729	4.248	0.506	q1_ao_1_e3_10_93_0017_12_0019_20_0004
-4722.9	3.407	-53.388	4.278	0.506	q1_ao_1_e3_10_93_0017_12_0019_20_0035
-4710.02	3.859	-50.005	4.305	0.506	q1_ao_1_e3_10_93_0024_13_0023_20_0025
-4713.27	3.441	-39.622	4.314	0.506	q1_ao_1_e3_1_28_0031_16_0018_24_0019
-4725.66	2.52	-56.019	4.28	0.506	q1_ao_1_e3_1_73_0003_21_0001_26_0021
-4722.28	2.465	-53.682	4.301	0.506	q1_ao_1_e3_1_73_0003_21_0001_26_0032
-4720.84	4.424	-45.686	4.301	0.506	q1_ao_1_e3_3_11_0002_36_0021_40_0022
-4722.06	4.563	-48.767	4.274	0.506	q1_ao_1_e3_3_11_0002_36_0021_40_0024
-4718.3	2.987	-43.713	4.282	0.506	q1_ao_1_e3_3_59_0021_41_0037_47_0017
-4715.51	4.038	-46.944	4.229	0.506	q1_ao_1_e3_3_61_0039_42_0024_48_0038
-4723.61	5.843	-51.043	4.298	0.506	q1_ao_1_e3_10_34_0020_4_0034_4_0029
-4723.5	6.016	-51.002	4.306	0.506	q1_ao_1_e3_10_34_0020_4_0034_4_0034
-4719.19	3.488	-45.72	4.279	0.506	q1_ao_1_e3_3_93_0040_46_0026_55_0026
-4719.59	4.099	-50.96	4.149	0.506	q1_ao_1_e3_4_23_0012_49_0015_57_0024
-4716.26	3.819	-47.507	4.165	0.506	q1_ao_1_e3_4_23_0012_49_0024_57_0005
-4712.91	4.349	-47.177	4.227	0.506	q1_ao_1_e3_4_62_0008_53_0030_59_0011
-4715.26	3.689	-46.028	4.317	0.506	q1_ao_1_e3_10_35_0009_4_0027_5_0022
-4723.05	4.508	-48.37	4.274	0.506	q1_ao_1_e3_4_92_0039_55_0008_61_0037
-4722.76	5.713	-50.171	4.25	0.506	q1_ao_1_e3_5_53_0030_61_0026_64_0031
-4723.26	4.425	-50.964	4.257	0.506	q1_ao_1_e3_6_38_0024_69_0030_79_0035
-4722.99	3.573	-52.065	4.236	0.506	q1_ao_1_e3_6_80_0007_74_0004_86_0032
-4720.97	3.398	-55.875	4.3	0.506	q1_ao_1_e3_6_80_0007_74_0031_86_0027
-4721.43	2.993	-54.236	4.414	0.506	q1_ao_1_e3_10_42_0035_5_0015_8_0032
-4717.46	4.714	-50.126	4.316	0.506	q1_ao_1_e3_7_48_0007_79_0031_90_0033
-4719.95	3.163	-48.686	4.222	0.506	q1_ao_1_e3_8_29_0015_86_0024_95_0024
-4722.12	3.277	-51.744	4.242	0.506	q1_ao_1_e3_10_48_0036_6_0011_9_0036
-4719.23	6.007	-48.375	4.305	0.506	q1_ao_1_e3_10_56_0034_7_0009_12_0012_12_0002
-4722.54	5.881	-50.682	4.293	0.506	q1_ao_1_e3_10_56_0034_7_0009_12_0012_12_0009
-4726.33	4.844	-57.509	4.362	0.506	q1_ao_1_e3_10_69_0021_9_0018_14_0037_13_0002
-4723.83	5.018	-55.608	4.361	0.506	q1_ao_1_e3_10_69_0021_9_0018_14_0037_13_0003
-4726.24	4.799	-57.435	4.357	0.506	q1_ao_1_e3_10_69_0021_9_0018_14_0037_13_0005
-4724.04	4.879	-56.138	4.345	0.506	q1_ao_1_e3_10_69_0021_9_0018_14_0037_13_0016
-4726.91	4.884	-56.329	4.347	0.506	q1_ao_1_e3_10_69_0021_9_0018_14_0037_13_0031
-4723.67	4.926	-52.654	4.366	0.506	q1_ao_1_e3_10_69_0021_9_0018_14_0037_13_0040
-4721.46	3.402	-50.574	4.265	0.506	q1_ao_1_e3_10_7_0006_9_0019_15_0034_13_0009
-4723.39	3.404	-52.189	4.257	0.506	q1_ao_1_e3_10_7_0006_9_0019_15_0034_13_0028
-4722.02	3.368	-53.504	4.258	0.506	q1_ao_1_e3_10_7_0006_9_0019_15_0037_13_0016
-4723.62	3.393	-52.586	4.249	0.506	q1_ao_1_e3_10_7_0006_9_0019_15_0038_14_0025
-4721	3.377	-57.451	4.286	0.506	q1_ao_1_e3_10_82_0027_11_0011_19_0015_17_0012
-4697.6	3.236	-59.487	4.305	0.506	q1_ao_1_e3_10_82_0027_11_0011_19_0015_17_0034
-4722.66	3.407	-57.66	4.283	0.506	q1_ao_1_e3_10_82_0027_11_0011_19_0020_17_0001
-4720.36	3.303	-57.36	4.288	0.506	q1_ao_1_e3_10_82_0027_11_0011_19_0020_17_0008
-4718.23	3.286	-58.751	4.287	0.506	q1_ao_1_e3_10_82_0027_11_0011_19_0020_17_0023
-4722.56	3.382	-59.111	4.286	0.506	q1_ao_1_e3_10_82_0027_11_0011_19_0020_17_0031
-4716.42	3.342	-56.131	4.294	0.506	q1_ao_1_e3_10_82_0027_11_0011_19_0020_17_0032
-4719.36	3.303	-58.891	4.289	0.506	q1_ao_1_e3_10_82_0027_11_0011_19_0021_17_0008
-4722.81	3.38	-58.028	4.282	0.506	q1_ao_1_e3_10_82_0027_11_0011_19_0021_17_0013
-4722.62	3.378	-57.988	4.286	0.506	q1_ao_1_e3_10_82_0027_11_0011_19_0021_17_0033
-4721.13	3.379	-58.932	4.279	0.506	q1_ao_1_e3_10_82_0027_11_0011_19_0021_17_0036
-4720.26	3.373	-58.915	4.286	0.506	q1_ao_1_e3_10_82_0027_11_0011_19_0023_17_0028
-4716.85	3.232	-56.172	4.283	0.506	q1_ao_1_e3_10_87_0002_12_0032_19_0030_17_0009
-4728.52	3.441	-58.315	4.237	0.506	q1_ao_1_e3_10_93_0017_12_0019_20_0003_19_0007
-4723.49	3.393	-53.419	4.258	0.506	q1_ao_1_e3_10_93_0017_12_0019_20_0003_19_0014
-4728.9	3.418	-58.305	4.24	0.506	q1_ao_1_e3_10_93_0017_12_0019_20_0003_19_0022
-4729.56	3.42	-59.593	4.246	0.506	q1_ao_1_e3_10_93_0017_12_0019_20_0003_19_0024
-4725.87	3.406	-56.989	4.259	0.506	q1_ao_1_e3_10_93_0017_12_0019_20_0004_19_0007
-4722.24	3.396	-53.927	4.264	0.506	q1_ao_1_e3_10_93_0017_12_0019_20_0004_19_0008
-4729.43	3.418	-59.051	4.247	0.506	q1_ao_1_e3_10_93_0017_12_0019_20_0004_19_0031
-4727.69	3.4	-57.449	4.25	0.506	q1_ao_1_e3_10_93_0017_12_0019_20_0004_19_0032
-4726.29	3.648	-55.505	4.257	0.506	q1_ao_1_e3_10_34_0020_4_0016_4_0011_1_0019
-4725.76	3.629	-55.431	4.255	0.506	q1_ao_1_e3_10_34_0020_4_0016_4_0011_1_0034
-4722.47	3.446	-53.875	4.268	0.506	q1_ao_1_e3_10_34_0020_4_0016_4_0012_1_0007
-4727.43	3.622	-55.818	4.255	0.506	q1_ao_1_e3_10_34_0020_4_0016_4_0012_1_0018
-4724.07	3.446	-54.64	4.248	0.506	q1_ao_1_e3_10_34_0020_4_0016_4_0022_1_0032
-4724.98	3.647	-53.907	4.256	0.506	q1_ao_1_e3_10_34_0020_4_0016_4_0022_1_0040
-4725.38	3.443	-54.572	4.254	0.506	q1_ao_1_e3_10_34_0020_4_0016_4_0028_1_0006
-4723.68	3.345	-54.575	4.269	0.506	q1_ao_1_e3_10_34_0020_4_0016_4_0028_1_0030
-4722.88	3.506	-53.686	4.269	0.506	q1_ao_1_e3_10_34_0020_4_0016_4_0033_1_0006
-4722.24	3.434	-52.175	4.261	0.506	q1_ao_1_e3_10_34_0020_4_0016_4_0033_1_0015
-4726.33	3.588	-54.744	4.249	0.506	q1_ao_1_e3_10_34_0020_4_0016_4_0033_1_0032
-4726.08	3.647	-55.311	4.255	0.506	q1_ao_1_e3_10_34_0020_4_0016_4_0038_1_0038
-4704.95	4.178	-47.22	4.315	0.506	q1_ao_1_e3_10_93_0024_13_0023_20_0025_20_0008
-4708.7	3.855	-47.81	4.275	0.506	q1_ao_1_e3_10_93_0024_13_0023_20_0025_20_0019
-4717.1	3.63	-56.54	4.323	0.506	q1_ao_1_e3_10_93_0024_13_0023_20_0025_20_0028
-4710.62	3.897	-50.96	4.306	0.506	q1_ao_1_e3_10_93_0024_13_0023_20_0025_20_0039
-4710.62	4.175	-38.24	4.292	0.506	q1_ao_1_e3_1_28_0031_16_0021_24_0028_21_0025
-4712.49	3.955	-41.953	4.296	0.506	q1_ao_1_e3_1_28_0031_16_0021_24_0029_21_0017
-4721.09	2.353	-52.266	4.27	0.506	q1_ao_1_e3_1_73_0003_21_0001_26_0021_23_0010
-4720.18	2.547	-53.591	4.3	0.506	q1_ao_1_e3_1_73_0003_21_0001_26_0032_23_0011
-4718.04	2.648	-53.473	4.28	0.506	q1_ao_1_e3_1_73_0003_21_0001_26_0032_23_0025
-4716.73	6.243	-47.288	4.33	0.506	q1_ao_1_e3_10_34_0020_4_0034_4_0008_2_0013
-4724.75	5.693	-51.924	4.296	0.506	q1_ao_1_e3_10_34_0020_4_0034_4_0010_2_0011
-4725.57	5.709	-52.006	4.298	0.506	q1_ao_1_e3_10_34_0020_4_0034_4_0010_2_0017
-4720.2	5.973	-49.616	4.305	0.506	q1_ao_1_e3_10_34_0020_4_0034_4_0010_2_0028
-4717.57	6.309	-46.188	4.3	0.506	q1_ao_1_e3_10_34_0020_4_0034_4_0034_2_0010
-4707.75	9.453	-38.478	4.43	0.506	q1_ao_1_e3_2_50_0033_31_0017_36_0032_30_0026
-4715.98	3.194	-47.565	4.299	0.506	q1_ao_1_e3_2_50_0036_31_0001_36_0008_31_0008
-4708.47	3.721	-37.691	4.291	0.506	q1_ao_1_e3_2_50_0036_31_0001_36_0011_31_0002
-4713.76	4.352	-51.58	4.296	0.506	q1_ao_1_e3_2_50_0036_31_0001_36_0019_31_0025
-4717.43	3.377	-50.328	4.279	0.506	q1_ao_1_e3_2_50_0036_31_0001_36_0019_31_0035
-4713.35	4.858	-42.31	4.305	0.506	q1_ao_1_e3_2_50_0036_31_0016_37_0025_33_0012
-4723.32	4.156	-54.426	4.276	0.506	q1_ao_1_e3_3_11_0002_36_0021_40_0002_35_0014
-4717.01	3.604	-45.999	4.31	0.506	q1_ao_1_e3_3_16_0003_37_0002_41_0030_36_0023
-4722.38	3.071	-52.155	4.296	0.506	q1_ao_1_e3_3_16_0003_37_0002_41_0030_36_0040
-4729.74	2.501	-57.684	4.417	0.506	q1_ao_1_e3_3_59_0021_41_0010_47_0017_43_0008
-4717.65	3.76	-50.596	4.263	0.506	q1_ao_1_e3_3_59_0021_41_0020_47_0040_44_0015
-4725.17	3.337	-54.791	4.25	0.506	q1_ao_1_e3_3_59_0021_41_0020_47_0040_44_0016
-4713.71	3.535	-51.153	4.26	0.506	q1_ao_1_e3_3_66_0034_43_0018_49_0034_45_0007
-4713.34	4.863	-45.813	4.274	0.506	q1_ao_1_e3_3_66_0034_43_0037_49_0026_46_0032
-4714.86	5.212	-46.514	4.225	0.506	q1_ao_1_e3_3_84_0017_45_0032_53_0032_49_0033
-4711.67	3.916	-46.905	4.301	0.506	q1_ao_1_e3_10_4_0026_5_0003_6_0029_4_0017
-4715.3	2.711	-42.818	4.357	0.506	q1_ao_1_e3_10_4_0026_5_0010_7_0025_4_0015
-4722.92	3.473	-54.457	4.303	0.506	q1_ao_1_e3_3_93_0040_46_0006_54_0003_50_0008
-4712.98	2.901	-42.781	4.339	0.506	q1_ao_1_e3_3_93_0040_46_0006_54_0025_50_0016
-4723.94	3.44	-51.122	4.123	0.506	q1_ao_1_e3_4_23_0012_49_0015_57_0012_57_0006
-4725.27	3.356	-52.55	4.131	0.506	q1_ao_1_e3_4_23_0012_49_0015_57_0012_57_0020
-4714.16	3.969	-48.61	4.16	0.506	q1_ao_1_e3_4_23_0012_49_0015_57_0024_57_0038
-4723.15	5.489	-51.061	4.248	0.506	q1_ao_1_e3_5_53_0030_61_0026_64_0031_66_0005
-4722.52	5.629	-50.394	4.253	0.506	q1_ao_1_e3_5_53_0030_61_0026_64_0031_66_0015
-4714.53	3.475	-46.208	4.257	0.506	q1_ao_1_e3_5_53_0030_61_0026_64_0031_66_0030
-4719.33	5.763	-48.507	4.267	0.506	q1_ao_1_e3_5_53_0030_61_0026_64_0033_66_0001
-4722.35	5.724	-50.865	4.249	0.506	q1_ao_1_e3_5_53_0030_61_0026_64_0033_66_0009
-4723.05	5.596	-50.786	4.247	0.506	q1_ao_1_e3_5_53_0030_61_0026_64_0033_66_0034
-4723.11	3.568	-54.631	4.215	0.506	q1_ao_1_e3_5_7_0035_63_0009_67_0006_67_0005
-4727.02	3.64	-53.813	4.215	0.506	q1_ao_1_e3_5_7_0035_63_0009_67_0006_67_0025
-4720.15	3.959	-52.08	4.214	0.506	q1_ao_1_e3_5_7_0035_63_0009_67_0010_67_0010
-4719.93	2.989	-52.864	4.357	0.506	q1_ao_1_e3_10_42_0035_5_0015_8_0006_6_0032
-4724.9	3.239	-55.771	4.397	0.506	q1_ao_1_e3_10_42_0035_5_0015_8_0013_6_0025
-4724.51	3.298	-55.669	4.397	0.506	q1_ao_1_e3_10_42_0035_5_0015_8_0017_6_0009
-4715.04	3.507	-51.071	4.407	0.506	q1_ao_1_e3_10_42_0035_5_0015_8_0025_6_0021
-4715.39	3.49	-51.588	4.405	0.506	q1_ao_1_e3_10_42_0035_5_0015_8_0032_6_0035
-4730.46	3.121	-56.997	4.35	0.506	q1_ao_1_e3_10_42_0035_5_0015_8_0035_6_0019
-4722.24	3.989	-47.742	4.3	0.506	q1_ao_1_e3_5_83_0005_64_0007_69_0018_71_0023
-4712.33	4.367	-43.35	4.284	0.506	q1_ao_1_e3_5_83_0005_64_0009_69_0004_71_0009
-4716.15	3.709	-52.309	4.122	0.506	q1_ao_1_e3_6_15_0001_66_0020_73_0010_73_0010
-4711.69	8.148	-37.474	4.318	0.506	q1_ao_1_e3_6_15_0001_66_0020_73_0016_73_0032
-4714.3	4.75	-45.039	4.245	0.506	q1_ao_1_e3_6_28_0008_67_0005_74_0032_74_0033
-4717.44	3.295	-48.229	4.21	0.506	q1_ao_1_e3_6_28_0008_67_0019_74_0036_76_0019
-4714.53	4.315	-46.559	4.232	0.506	q1_ao_1_e3_6_28_0008_67_0028_74_0013_76_0008
-4714.3	4.628	-42.143	4.236	0.506	q1_ao_1_e3_6_28_0008_67_0028_74_0014_76_0040
-4712.48	3.915	-46.597	4.288	0.506	q1_ao_1_e3_6_28_0008_67_0028_74_0031_76_0023
-4706.68	4.72	-48.846	4.424	0.506	q1_ao_1_e3_10_45_0035_5_0028_9_0027_7_0012
-4726.27	3.341	-58.952	4.249	0.506	q1_ao_1_e3_10_48_0036_6_0011_9_0009_7_0004
-4728.97	3.418	-60.087	4.246	0.506	q1_ao_1_e3_10_48_0036_6_0011_9_0009_7_0009
-4726.1	3.373	-58.701	4.253	0.506	q1_ao_1_e3_10_48_0036_6_0011_9_0009_7_0011
-4728.76	3.442	-59.428	4.266	0.506	q1_ao_1_e3_10_48_0036_6_0011_9_0009_7_0017
-4722.72	3.362	-55.025	4.26	0.506	q1_ao_1_e3_10_48_0036_6_0011_9_0009_7_0021
-4728.1	3.398	-59.555	4.24	0.506	q1_ao_1_e3_10_48_0036_6_0011_9_0009_7_0039
-4724.27	3.329	-56.185	4.251	0.506	q1_ao_1_e3_10_48_0036_6_0011_9_0009_7_0040
-4725.55	3.44	-57.093	4.267	0.506	q1_ao_1_e3_10_48_0036_6_0011_9_0012_7_0001
-4711.75	4.23	-45.646	4.203	0.506	q1_ao_1_e3_10_48_0036_6_0011_9_0012_7_0009
-4729.22	3.352	-58.22	4.251	0.506	q1_ao_1_e3_10_48_0036_6_0011_9_0012_7_0014
-4729.35	3.358	-59.787	4.238	0.506	q1_ao_1_e3_10_48_0036_6_0011_9_0012_7_0031
-4700.44	3.749	-51.017	4.171	0.506	q1_ao_1_e3_6_38_0024_69_0030_79_0035_82_0014
-4723.89	3.807	-50.617	4.371	0.506	q1_ao_1_e3_6_41_0031_70_0018_80_0039_83_0016
-4726.34	3.622	-51.775	4.36	0.506	q1_ao_1_e3_6_41_0031_70_0018_80_0039_83_0027
-4721.69	4.03	-49.463	4.358	0.506	q1_ao_1_e3_6_41_0031_70_0018_80_0039_83_0032
-4713.41	6.052	-49.071	4.32	0.506	q1_ao_1_e3_6_80_0007_74_0004_86_0027_87_0020
-4726.39	3.499	-53.916	4.212	0.506	q1_ao_1_e3_6_80_0007_74_0004_86_0032_87_0005
-4725.23	3.521	-54.201	4.209	0.506	q1_ao_1_e3_6_80_0007_74_0004_86_0032_87_0019
-4724.82	3.19	-54.188	4.201	0.506	q1_ao_1_e3_6_80_0007_74_0004_86_0032_87_0024
-4724.49	3.71	-53.834	4.213	0.506	q1_ao_1_e3_6_80_0007_74_0004_86_0032_87_0026
-4726.13	3.064	-56.475	4.203	0.506	q1_ao_1_e3_6_80_0007_74_0004_86_0032_87_0027
-4720.65	3.182	-54.472	4.217	0.506	q1_ao_1_e3_6_80_0007_74_0004_86_0032_87_0028
-4724.88	3.064	-54.939	4.201	0.506	q1_ao_1_e3_6_80_0007_74_0004_86_0032_87_0040
-4720.67	3.515	-49.679	4.301	0.506	q1_ao_1_e3_7_3_0006_78_0002_88_0011_88_0038
-4713.72	2.748	-44.389	4.275	0.506	q1_ao_1_e3_7_3_0006_78_0017_88_0015_89_0015
-4725.26	3.371	-58.865	4.255	0.506	q1_ao_1_e3_10_48_0036_6_0011_9_0036_8_0038
-4721.88	3.387	-50.065	4.293	0.506	q1_ao_1_e3_10_48_0036_6_0027_9_0008_8_0005
-4722.55	3.468	-50.103	4.303	0.506	q1_ao_1_e3_10_48_0036_6_0027_9_0008_8_0036
-4707.48	4.394	-42.147	4.186	0.494	q1_ao_1_e3_4_62_0008
-4696.9	6.127	-44.887	4.283	0.494	q1_ao_1_e3_10_76_0021
-4717.91	3.808	-55.512	4.297	0.494	q1_ao_1_e3_10_82_0027_11_0011
-4715.3	6.512	-46.4	4.345	0.494	q1_ao_1_e3_10_87_0002_12_0032
-4725.19	6.313	-44.611	4.261	0.494	q1_ao_1_e3_10_93_0017_12_0009
-4721.19	6.359	-42.35	4.261	0.494	q1_ao_1_e3_10_16_0016_1_0011
-4723.06	3.956	-53.262	4.246	0.494	q1_ao_1_e3_1_58_0025_20_0013
-4711.83	4.621	-40.299	4.185	0.494	q1_ao_1_e3_1_58_0025_20_0029
-4720.08	5.986	-49.198	4.297	0.494	q1_ao_1_e3_10_18_0032_2_0007
-4715.47	3.199	-45.528	4.321	0.494	q1_ao_1_e3_2_50_0033_31_0025
-4684.99	3.489	-27.736	4.346	0.494	q1_ao_1_e3_10_28_0003_3_0021
-4716.96	6.229	-49.375	4.305	0.494	q1_ao_1_e3_10_34_0020_4_0034
-4715.52	6.166	-44.977	4.298	0.494	q1_ao_1_e3_10_35_0028_4_0022
-4715.45	4.61	-42.164	4.254	0.494	q1_ao_1_e3_4_83_0001_54_0006
-4719.21	4.6	-43.109	4.26	0.494	q1_ao_1_e3_4_83_0001_54_0007
-4720.56	4.264	-44.107	4.233	0.494	q1_ao_1_e3_4_83_0001_54_0020
-4717.91	4.777	-42.503	4.26	0.494	q1_ao_1_e3_4_83_0001_54_0033
-4723.81	3.278	-52.474	4.413	0.494	q1_ao_1_e3_10_42_0035_5_0015
-4709.08	5.563	-38.524	4.259	0.494	q1_ao_1_e3_5_7_0035_63_0039
-4718.38	3.407	-47.026	4.362	0.494	q1_ao_1_e3_10_48_0036_6_0027
-4706.1	4.803	-40.657	4.218	0.494	q1_ao_1_e3_6_6_0017_72_0026
-4713.93	4.539	-37.325	4.275	0.494	q1_ao_1_e3_7_25_0010_77_0038
-4719.25	4.438	-47.093	4.297	0.494	q1_ao_1_e3_10_57_0040_7_0019
-4720.1	4.541	-47.979	4.295	0.494	q1_ao_1_e3_10_57_0040_7_0035
-4711.84	6.446	-40.555	4.28	0.494	q1_ao_1_e3_7_77_0038_82_0033
-4714.81	6.173	-47.798	4.305	0.494	q1_ao_1_e3_10_56_0034_7_0009_12_0027
-4721.81	4.564	-48.216	4.3	0.494	q1_ao_1_e3_10_57_0040_7_0007_12_0023
-4719.4	4.706	-49.636	4.313	0.494	q1_ao_1_e3_10_57_0040_7_0007_12_0025
-4720.94	4.518	-48.901	4.288	0.494	q1_ao_1_e3_10_57_0040_7_0019_12_0007
-4722.21	4.559	-47.548	4.283	0.494	q1_ao_1_e3_10_57_0040_7_0019_12_0035
-4718.54	4.091	-49.095	4.259	0.494	q1_ao_1_e3_10_57_0040_7_0025_12_0022
-4718.75	4.497	-48.258	4.305	0.494	q1_ao_1_e3_10_57_0040_7_0035_12_0005
-4720.2	4.42	-48.501	4.294	0.494	q1_ao_1_e3_10_57_0040_7_0035_12_0026
-4721.37	4.479	-47.439	4.289	0.494	q1_ao_1_e3_10_57_0040_7_0035_12_0027
-4718.83	4.472	-47.353	4.29	0.494	q1_ao_1_e3_10_57_0040_7_0035_12_0028
-4715.21	6.435	-46.835	4.346	0.494	q1_ao_1_e3_10_87_0002_12_0032_19_0019
-4723.52	5.585	-47.579	4.281	0.494	q1_ao_1_e3_10_25_0025_3_0006
-4723.82	6.322	-45.123	4.253	0.494	q1_ao_1_e3_10_34_0018_3_0019
-4713.48	2.839	-46.226	4.293	0.494	q1_ao_1_e3_3_59_0021_41_0013_47_0039
-4713.27	5.146	-47.708	4.261	0.494	q1_ao_1_e3_3_66_0034_43_0018_49_0015
-4720.97	7.007	-45.891	4.347	0.494	q1_ao_1_e3_3_70_0035_43_0020_49_0017
-4721.51	6.002	-49.888	4.302	0.494	q1_ao_1_e3_10_34_0020_4_0034_4_0008
-4720.89	6.187	-50.389	4.31	0.494	q1_ao_1_e3_10_34_0020_4_0034_4_0010
-4719.14	5.958	-48.724	4.305	0.494	q1_ao_1_e3_10_34_0020_4_0034_4_0020
-4723	4.878	-51.535	4.139	0.494	q1_ao_1_e3_4_23_0012_49_0015_57_0012
-4722.51	4.573	-48.701	4.308	0.494	q1_ao_1_e3_10_35_0009_4_0027_5_0036
-4722.94	5.609	-51.215	4.244	0.494	q1_ao_1_e3_5_53_0030_61_0026_64_0033
-4714.64	2.551	-46.198	4.395	0.494	q1_ao_1_e3_5_80_0023_64_0026_68_0007
-4697.84	6.135	-40.9	4.288	0.494	q1_ao_1_e3_6_17_0005_67_0016_73_0015
-4721.31	3.735	-50.266	4.359	0.494	q1_ao_1_e3_6_41_0031_70_0018_80_0039
-4717.09	3.288	-51.789	4.426	0.494	q1_ao_1_e3_10_42_0035_5_0015_8_0002
-4719.54	2.84	-53.177	4.416	0.494	q1_ao_1_e3_10_42_0035_5_0015_8_0006
-4721.71	3.005	-53.761	4.411	0.494	q1_ao_1_e3_10_42_0035_5_0015_8_0013
-4722.94	3.152	-53.942	4.415	0.494	q1_ao_1_e3_10_42_0035_5_0015_8_0017
-4721.1	3.336	-52.497	4.414	0.494	q1_ao_1_e3_10_42_0035_5_0015_8_0025
-4724.5	3.326	-54.786	4.405	0.494	q1_ao_1_e3_10_42_0035_5_0015_8_0035
-4724.75	3.129	-55.864	4.421	0.494	q1_ao_1_e3_10_42_0035_5_0015_8_0040
-4712.27	6.441	-38.531	4.333	0.494	q1_ao_1_e3_8_2_0023_85_0003_94_0020
-4722.36	3.516	-53.923	4.251	0.494	q1_ao_1_e3_10_48_0036_6_0011_9_0009
-4718.05	6.298	-48.314	4.299	0.494	q1_ao_1_e3_10_56_0034_7_0009_12_0004_12_0025
-4718.65	6.008	-47.78	4.306	0.494	q1_ao_1_e3_10_56_0034_7_0009_12_0012_12_0018
-4718.74	6.12	-48.848	4.298	0.494	q1_ao_1_e3_10_56_0034_7_0009_12_0012_12_0021
-4717.8	6.235	-49.21	4.311	0.494	q1_ao_1_e3_10_56_0034_7_0009_12_0012_12_0025
-4718.92	5.96	-48.769	4.307	0.494	q1_ao_1_e3_10_56_0034_7_0009_12_0012_12_0028
-4718.26	6.122	-48.133	4.303	0.494	q1_ao_1_e3_10_56_0034_7_0009_12_0012_12_0034
-4721.52	5.867	-47.298	4.329	0.494	q1_ao_1_e3_10_56_0034_7_0015_12_0040_13_0001
-4728.43	5.402	-51.842	4.312	0.494	q1_ao_1_e3_10_56_0034_7_0015_12_0040_13_0012
-4715.84	4.141	-47.202	4.26	0.494	q1_ao_1_e3_10_57_0040_7_0025_12_0016_13_0039
-4728.01	4.905	-58.062	4.335	0.494	q1_ao_1_e3_10_69_0021_9_0018_14_0037_13_0029
-4715.81	6.212	-50.008	4.344	0.494	q1_ao_1_e3_10_76_0021_10_0035_17_0010_15_0033
-4722.02	3.363	-59.306	4.29	0.494	q1_ao_1_e3_10_82_0027_11_0011_19_0020_17_0033
-4712.39	4.106	-50.084	4.276	0.494	q1_ao_1_e3_10_82_0027_11_0011_19_0021_17_0030
-4719.65	3.359	-59.631	4.285	0.494	q1_ao_1_e3_10_82_0027_11_0011_19_0032_17_0010
-4717.06	3.834	-52.637	4.267	0.494	q1_ao_1_e3_10_87_0002_12_0032_19_0030_17_0012
-4718.6	3.793	-52.838	4.262	0.494	q1_ao_1_e3_10_87_0002_12_0032_19_0030_17_0035
-4713.68	3.841	-49.716	4.268	0.494	q1_ao_1_e3_10_87_0002_12_0032_19_0030_17_0038
-4719.53	6.276	-43.828	4.294	0.494	q1_ao_1_e3_10_92_0002_12_0009_19_0027_18_0007
-4725.28	3.626	-54.262	4.255	0.494	q1_ao_1_e3_10_34_0020_4_0016_4_0011_1_0003
-4723.59	3.436	-52.627	4.248	0.494	q1_ao_1_e3_10_34_0020_4_0016_4_0011_1_0006
-4725.1	3.589	-54.514	4.254	0.494	q1_ao_1_e3_10_34_0020_4_0016_4_0011_1_0026
-4727.26	3.69	-54.715	4.253	0.494	q1_ao_1_e3_10_34_0020_4_0016_4_0011_1_0038
-4724.85	3.67	-55.192	4.253	0.494	q1_ao_1_e3_10_34_0020_4_0016_4_0022_1_0015
-4723.69	3.528	-52.271	4.263	0.494	q1_ao_1_e3_10_34_0020_4_0016_4_0022_1_0024
-4724.91	3.544	-52.757	4.251	0.494	q1_ao_1_e3_10_34_0020_4_0016_4_0022_1_0028
-4724.6	3.551	-54.48	4.255	0.494	q1_ao_1_e3_10_34_0020_4_0016_4_0033_1_0019
-4725.44	3.588	-54.503	4.256	0.494	q1_ao_1_e3_10_34_0020_4_0016_4_0033_1_0027
-4724.53	3.637	-52.048	4.26	0.494	q1_ao_1_e3_10_34_0020_4_0016_4_0038_1_0001
-4725.4	3.6	-54.477	4.253	0.494	q1_ao_1_e3_10_34_0020_4_0016_4_0038_1_0007
-4718.15	3.919	-48.939	4.268	0.494	q1_ao_1_e3_10_34_0020_4_0016_4_0038_1_0011
-4725.34	3.608	-54.651	4.246	0.494	q1_ao_1_e3_10_34_0020_4_0016_4_0038_1_0021
-4718.86	4.79	-46.92	4.308	0.494	q1_ao_1_e3_1_28_0031_16_0018_24_0001_21_0019
-4715.05	3.869	-42.988	4.261	0.494	q1_ao_1_e3_1_28_0031_16_0038_24_0031_22_0040
-4728.79	5.26	-50.955	4.305	0.494	q1_ao_1_e3_2_14_0005_26_0011_32_0038_26_0020
-4724.35	3.894	-52.801	4.254	0.494	q1_ao_1_e3_2_14_0005_26_0020_32_0001_26_0037
-4723.16	5.953	-51.407	4.303	0.494	q1_ao_1_e3_10_34_0020_4_0034_4_0010_2_0007
-4715.78	6.101	-48.41	4.313	0.494	q1_ao_1_e3_10_34_0020_4_0034_4_0010_2_0021
-4719.33	6.097	-49.054	4.308	0.494	q1_ao_1_e3_10_34_0020_4_0034_4_0010_2_0026
-4718.28	6.271	-48.594	4.316	0.494	q1_ao_1_e3_10_34_0020_4_0034_4_0029_2_0015
-4724.47	5.821	-51.441	4.289	0.494	q1_ao_1_e3_10_34_0020_4_0034_4_0029_2_0021
-4718.2	5.943	-49.595	4.313	0.494	q1_ao_1_e3_10_34_0020_4_0034_4_0029_2_0022
-4719.26	6.128	-48.815	4.31	0.494	q1_ao_1_e3_10_34_0020_4_0034_4_0034_2_0008
-4718.34	6.046	-48.389	4.313	0.494	q1_ao_1_e3_10_34_0020_4_0034_4_0037_2_0007
-4720.88	6.18	-50	4.305	0.494	q1_ao_1_e3_10_34_0020_4_0034_4_0037_2_0021
-4720.37	6.103	-49.296	4.312	0.494	q1_ao_1_e3_10_34_0020_4_0034_4_0037_2_0026
-4712.11	4.663	-41.663	4.262	0.494	q1_ao_1_e3_3_16_0003_37_0021_41_0001_37_0011
-4710	4.192	-38.554	4.302	0.494	q1_ao_1_e3_3_93_0040_46_0007_54_0017_51_0034
-4725.29	3.471	-54.926	4.136	0.494	q1_ao_1_e3_4_23_0012_49_0015_57_0012_57_0011
-4724.6	4.682	-53.488	4.122	0.494	q1_ao_1_e3_4_23_0012_49_0015_57_0012_57_0024
-4722.45	5.078	-51.138	4.156	0.494	q1_ao_1_e3_4_23_0012_49_0015_57_0026_57_0030
-4699.9	4.359	-53.059	4.115	0.494	q1_ao_1_e3_4_23_0012_49_0024_57_0009_57_0009
-4716.08	5.853	-43.019	4.326	0.494	q1_ao_1_e3_10_4_0026_5_0033_7_0022_5_0029
-4720.73	5.641	-50.006	4.261	0.494	q1_ao_1_e3_5_53_0030_61_0026_64_0011_66_0035
-4723.76	5.673	-51.348	4.24	0.494	q1_ao_1_e3_5_53_0030_61_0026_64_0031_66_0039
-4720.79	2.978	-48.228	4.336	0.494	q1_ao_1_e3_5_75_0021_63_0031_68_0013_68_0030
-4718.91	3.106	-53.402	4.411	0.494	q1_ao_1_e3_10_42_0035_5_0015_8_0002_6_0021
-4714	3.631	-51.466	4.409	0.494	q1_ao_1_e3_10_42_0035_5_0015_8_0002_6_0022
-4720.42	2.941	-51.516	4.374	0.494	q1_ao_1_e3_10_42_0035_5_0015_8_0006_6_0010
-4716.26	3.434	-51.48	4.389	0.494	q1_ao_1_e3_10_42_0035_5_0015_8_0025_6_0012
-4731.31	3.216	-58.077	4.382	0.494	q1_ao_1_e3_10_42_0035_5_0015_8_0025_6_0020
-4713.17	3.482	-50.776	4.397	0.494	q1_ao_1_e3_10_42_0035_5_0015_8_0032_6_0013
-4721.64	3.09	-52.252	4.394	0.494	q1_ao_1_e3_10_42_0035_5_0015_8_0035_6_0002
-4718.87	3.196	-53.31	4.387	0.494	q1_ao_1_e3_10_42_0035_5_0015_8_0035_6_0021
-4729.51	2.959	-55.925	4.365	0.494	q1_ao_1_e3_10_42_0035_5_0015_8_0035_6_0025
-4723.74	3.024	-54.429	4.372	0.494	q1_ao_1_e3_10_42_0035_5_0015_8_0035_6_0030
-4723.45	3.141	-53.781	4.364	0.494	q1_ao_1_e3_10_42_0035_5_0015_8_0035_6_0034
-4721.61	3.058	-53.442	4.373	0.494	q1_ao_1_e3_10_42_0035_5_0015_8_0035_6_0036
-4716.4	10.479	-36.787	4.387	0.494	q1_ao_1_e3_6_15_0001_66_0008_73_0033_73_0015
-4709.77	7.138	-34.296	4.221	0.494	q1_ao_1_e3_6_15_0001_66_0020_73_0016_73_0029
-4716.63	3.792	-58.192	4.409	0.494	q1_ao_1_e3_10_45_0035_5_0028_9_0027_7_0033
-4724.64	3.634	-57.608	4.441	0.494	q1_ao_1_e3_10_45_0035_5_0028_9_0027_7_0035
-4718.48	3.989	-46.541	4.364	0.494	q1_ao_1_e3_6_41_0031_70_0018_80_0039_83_0011
-4727.74	3.21	-50.615	4.329	0.494	q1_ao_1_e3_6_41_0031_70_0018_80_0039_83_0033
-4726.78	3.798	-49.817	4.334	0.494	q1_ao_1_e3_6_41_0031_70_0018_80_0039_83_0036
-4726.24	5.164	-53.142	4.278	0.494	q1_ao_1_e3_6_80_0007_74_0031_86_0016_87_0002
-4726.53	4.726	-52.55	4.28	0.494	q1_ao_1_e3_6_80_0007_74_0031_86_0021_87_0027
-4724.1	4.408	-51.853	4.299	0.494	q1_ao_1_e3_6_80_0007_74_0031_86_0021_87_0039
-4722.77	3.664	-51.343	4.327	0.494	q1_ao_1_e3_7_3_0006_78_0001_88_0015_88_0010
-4699.82	4.762	-47.746	4.269	0.494	q1_ao_1_e3_7_48_0007_79_0031_90_0033_92_0015
-4705.22	7.312	-32.581	4.198	0.481	q1_ao_1_e3_6_11_0022
-4695.48	6.592	-43.712	4.276	0.481	q1_ao_1_e3_10_28_0003
-4723.65	6.686	-47.84	4.271	0.481	q1_ao_1_e3_10_34_0018
-4714.23	6.359	-41.171	4.279	0.481	q1_ao_1_e3_10_38_0033
-4701.89	6.769	-43.646	4.285	0.481	q1_ao_1_e3_10_54_0023
-4708.65	3.793	-41.156	4.19	0.481	q1_ao_1_e3_1_58_0025
-4701.44	6.503	-36.041	4.362	0.481	q1_ao_1_e3_3_61_0035
-4715.69	6.293	-46.248	4.278	0.481	q1_ao_1_e3_10_72_0012
-4711.21	5.095	-38.669	4.236	0.481	q1_ao_1_e3_4_83_0001
-4719.58	6.595	-45.333	4.257	0.481	q1_ao_1_e3_10_8_0027
-4696.87	6.471	-40.069	4.25	0.481	q1_ao_1_e3_10_91_0016
-4716.84	6.543	-45.223	4.257	0.481	q1_ao_1_e3_10_93_0017
-4711.75	5.976	-42.635	4.278	0.481	q1_ao_1_e3_9_82_0009_100_0036
-4729.29	6.345	-46.901	4.308	0.481	q1_ao_1_e3_10_76_0021_10_0012
-4706	6.726	-38.853	4.264	0.481	q1_ao_1_e3_10_76_0032_10_0011
-4720.64	6.7	-42.536	4.243	0.481	q1_ao_1_e3_10_76_0032_10_0026
-4725.44	6.562	-43.551	4.257	0.481	q1_ao_1_e3_10_76_0040_10_0027
-4710.95	6.318	-43.427	4.312	0.481	q1_ao_1_e3_10_82_0027_11_0030
-4725.01	6.557	-45.049	4.244	0.481	q1_ao_1_e3_10_8_0027_11_0006
-4708.66	6.393	-44.03	4.269	0.481	q1_ao_1_e3_10_8_0027_11_0008
-4705.3	6.454	-43.678	4.269	0.481	q1_ao_1_e3_10_8_0027_11_0017
-4726.67	6.311	-46.526	4.247	0.481	q1_ao_1_e3_10_8_0027_11_0020
-4708.59	6.686	-46.329	4.292	0.481	q1_ao_1_e3_10_8_0027_11_0029
-4709.95	6.408	-45.324	4.259	0.481	q1_ao_1_e3_10_8_0027_11_0039
-4715.34	6.54	-47.62	4.337	0.481	q1_ao_1_e3_10_87_0002_12_0011
-4715.73	6.537	-44.518	4.324	0.481	q1_ao_1_e3_10_87_0002_12_0016
-4719.24	6.348	-47.213	4.3	0.481	q1_ao_1_e3_10_87_0002_12_0023
-4718.59	6.521	-41.502	4.234	0.481	q1_ao_1_e3_10_93_0017_12_0012
-4721.46	6.362	-41.487	4.253	0.481	q1_ao_1_e3_10_93_0017_12_0013
-4720.45	6.569	-42.561	4.27	0.481	q1_ao_1_e3_10_93_0017_12_0016
-4705.4	6.332	-40.467	4.252	0.481	q1_ao_1_e3_10_93_0017_12_0034
-4724.43	6.327	-44.437	4.289	0.481	q1_ao_1_e3_10_94_0009_13_0013
-4725.31	6.396	-47.843	4.313	0.481	q1_ao_1_e3_10_94_0009_13_0024
-4722.54	6.611	-45.148	4.29	0.481	q1_ao_1_e3_10_94_0009_13_0034
-4715.63	7.151	-37.683	4.352	0.481	q1_ao_1_e3_1_100_0018_13_0005
-4708.32	7.703	-31.258	4.313	0.481	q1_ao_1_e3_1_20_0035_15_0015
-4715.04	7.296	-36.498	4.306	0.481	q1_ao_1_e3_1_2_0022_15_0034
-4723.39	6.332	-43.755	4.285	0.481	q1_ao_1_e3_10_16_0016_1_0002
-4718.71	6.806	-46.627	4.293	0.481	q1_ao_1_e3_10_18_0028_1_0015
-4718.73	6.856	-47.659	4.326	0.481	q1_ao_1_e3_10_18_0028_1_0020
-4720.29	6.618	-42.571	4.322	0.481	q1_ao_1_e3_10_18_0028_1_0022
-4710.02	7.039	-38.913	4.354	0.481	q1_ao_1_e3_2_49_0021_31_0020
-4711.65	7.971	-32.936	4.274	0.481	q1_ao_1_e3_2_67_0028_33_0009
-4707.35	7.805	-35.867	4.355	0.481	q1_ao_1_e3_3_100_0036_36_0040
-4709.87	7.74	-31.218	4.289	0.481	q1_ao_1_e3_3_27_0007_38_0011
-4710.48	7.367	-32.755	4.314	0.481	q1_ao_1_e3_3_27_0007_38_0018
-4711.09	7.839	-31.881	4.301	0.481	q1_ao_1_e3_3_3_0004_38_0017
-4725.7	6.222	-44.933	4.286	0.481	q1_ao_1_e3_10_28_0003_3_0007
-4715.42	6.662	-46.965	4.293	0.481	q1_ao_1_e3_10_28_0003_3_0023
-4725.56	6.323	-44.532	4.301	0.481	q1_ao_1_e3_10_28_0003_3_0029
-4711.41	6.169	-46.27	4.298	0.481	q1_ao_1_e3_10_28_0003_3_0038
-4722.95	6.138	-43.965	4.278	0.481	q1_ao_1_e3_10_34_0018_3_0015
-4712.09	6.882	-47.378	4.335	0.481	q1_ao_1_e3_10_34_0018_3_0034
-4712.5	7.741	-38.197	4.371	0.481	q1_ao_1_e3_3_59_0018_41_0001
-4693.04	9.352	-27.019	4.338	0.481	q1_ao_1_e3_3_59_0018_41_0007
-4712.11	8.595	-37.027	4.342	0.481	q1_ao_1_e3_3_6_0028_42_0021
-4707.45	7.68	-32.079	4.327	0.481	q1_ao_1_e3_3_65_0035_43_0028
-4708.36	7.333	-34.311	4.308	0.481	q1_ao_1_e3_3_75_0037_44_0020
-4721.24	4.441	-49.835	4.149	0.481	q1_ao_1_e3_4_23_0012_49_0015
-4710.49	7.797	-34.406	4.296	0.481	q1_ao_1_e3_4_28_0001_49_0014
-4725.6	6.36	-46.268	4.306	0.481	q1_ao_1_e3_10_35_0009_4_0007
-4720.06	6.499	-42.931	4.284	0.481	q1_ao_1_e3_10_35_0009_4_0018
-4724.76	4.459	-50.433	4.284	0.481	q1_ao_1_e3_10_35_0009_4_0027
-4716.2	6.486	-47.932	4.299	0.481	q1_ao_1_e3_10_35_0028_4_0025
-4709.98	6.264	-42.873	4.239	0.481	q1_ao_1_e3_10_35_0028_4_0030
-4722.43	6.696	-43.485	4.308	0.481	q1_ao_1_e3_10_38_0033_4_0006
-4725.26	6.752	-46.951	4.351	0.481	q1_ao_1_e3_10_38_0033_4_0013
-4709.38	7.61	-36.053	4.289	0.481	q1_ao_1_e3_4_36_0038_50_0023
-4712.3	7.774	-36.859	4.28	0.481	q1_ao_1_e3_4_71_0001_53_0018
-4710.64	7.199	-38.835	4.319	0.481	q1_ao_1_e3_4_72_0019_54_0009
-4719.14	7.004	-40.674	4.305	0.481	q1_ao_1_e3_4_72_0019_54_0012
-4708.85	4.792	-39.336	4.274	0.481	q1_ao_1_e3_4_83_0001_54_0001
-4714.07	4.859	-39.599	4.244	0.481	q1_ao_1_e3_4_83_0001_54_0003
-4717.05	4.617	-42.748	4.251	0.481	q1_ao_1_e3_4_83_0001_54_0017
-4723.71	6.123	-45.45	4.274	0.481	q1_ao_1_e3_10_42_0035_5_0011
-4716.38	6.633	-41.54	4.253	0.481	q1_ao_1_e3_10_42_0035_5_0019
-4718.21	6.374	-41.187	4.272	0.481	q1_ao_1_e3_10_42_0035_5_0030
-4714.87	6.217	-46.171	4.323	0.481	q1_ao_1_e3_10_43_0040_5_0034
-4714.12	6.526	-43.897	4.319	0.481	q1_ao_1_e3_10_43_0040_5_0036
-4704.45	7.366	-28.822	4.304	0.481	q1_ao_1_e3_5_81_0008_64_0030
-4709.27	7.877	-37.087	4.391	0.481	q1_ao_1_e3_5_98_0001_66_0015
-4711.36	7.25	-35.019	4.355	0.481	q1_ao_1_e3_6_11_0006_66_0008
-4710.25	7.091	-35.906	4.343	0.481	q1_ao_1_e3_6_11_0006_66_0023
-4716.53	7.056	-38.807	4.318	0.481	q1_ao_1_e3_6_24_0020_67_0005
-4722.35	6.715	-42.784	4.263	0.481	q1_ao_1_e3_10_48_0036_6_0009
-4711.44	5.132	-40.901	4.312	0.481	q1_ao_1_e3_6_56_0011_72_0006
-4711.36	7.958	-32.953	4.318	0.481	q1_ao_1_e3_6_77_0013_74_0034
-4692.13	8.846	-31.989	4.252	0.481	q1_ao_1_e3_6_82_0025_74_0018
-4712.69	7.745	-34.422	4.335	0.481	q1_ao_1_e3_6_82_0025_74_0030
-4712.35	6.415	-35.922	4.328	0.481	q1_ao_1_e3_6_85_0033_75_0012
-4710.51	5.109	-40.104	4.335	0.481	q1_ao_1_e3_6_9_0021_75_0028
-4721.48	6.989	-42.876	4.319	0.481	q1_ao_1_e3_10_54_0014_7_0015
-4726.61	6.745	-46.68	4.322	0.481	q1_ao_1_e3_10_54_0014_7_0017
-4721.59	6.896	-43.454	4.332	0.481	q1_ao_1_e3_10_54_0014_7_0026
-4726.46	6.317	-49.791	4.29	0.481	q1_ao_1_e3_10_54_0023_7_0010
-4725.35	6.444	-47.942	4.31	0.481	q1_ao_1_e3_10_54_0023_7_0018
-4713.96	6.415	-45.725	4.285	0.481	q1_ao_1_e3_10_54_0023_7_0023
-4713.56	6.722	-43.602	4.297	0.481	q1_ao_1_e3_10_54_0023_7_0031
-4713.65	6.523	-45.209	4.292	0.481	q1_ao_1_e3_10_54_0023_7_0037
-4717.8	5.046	-44.614	4.314	0.481	q1_ao_1_e3_10_57_0040_7_0030
-4720.04	4.929	-45.331	4.312	0.481	q1_ao_1_e3_10_57_0040_7_0040
-4718.78	4.585	-39.906	4.42	0.481	q1_ao_1_e3_10_60_0024_7_0033
-4711.39	7.916	-34.608	4.299	0.481	q1_ao_1_e3_7_68_0018_81_0040
-4715.84	7.905	-36.599	4.311	0.481	q1_ao_1_e3_8_15_0022_85_0032
-4711.7	8.264	-33.222	4.31	0.481	q1_ao_1_e3_9_11_0030_94_0007
-4718.74	7.946	-38.619	4.294	0.481	q1_ao_1_e3_9_11_0030_94_0009
-4711.46	8.132	-31.358	4.303	0.481	q1_ao_1_e3_9_11_0030_94_0025
-4715.32	7.483	-39.576	4.278	0.481	q1_ao_1_e3_9_11_0030_94_0028
-4722.38	6.487	-45.096	4.305	0.481	q1_ao_1_e3_10_54_0023_7_0010_12_0028
-4723.23	6.482	-44.307	4.297	0.481	q1_ao_1_e3_10_54_0023_7_0018_12_0008
-4725.84	6.441	-46.614	4.314	0.481	q1_ao_1_e3_10_54_0023_7_0018_12_0014
-4705.55	6.501	-47.05	4.309	0.481	q1_ao_1_e3_10_54_0023_7_0018_12_0025
-4724.81	6.497	-45.746	4.305	0.481	q1_ao_1_e3_10_54_0023_7_0018_12_0027
-4724.31	6.458	-46.243	4.305	0.481	q1_ao_1_e3_10_54_0023_7_0018_12_0037
-4719.3	6.17	-50.543	4.317	0.481	q1_ao_1_e3_10_56_0034_7_0009_12_0012
-4718.33	6.304	-48.878	4.306	0.481	q1_ao_1_e3_10_56_0034_7_0009_12_0019
-4724.92	5.208	-49.552	4.313	0.481	q1_ao_1_e3_10_56_0034_7_0015_12_0030
-4722.03	5.65	-47.454	4.335	0.481	q1_ao_1_e3_10_56_0034_7_0015_12_0031
-4720.37	6.237	-47.238	4.325	0.481	q1_ao_1_e3_10_56_0034_7_0015_12_0032
-4726.37	5.526	-50.269	4.323	0.481	q1_ao_1_e3_10_56_0034_7_0015_12_0040
-4722.39	4.67	-48.784	4.319	0.481	q1_ao_1_e3_10_57_0040_7_0007_12_0019
-4720.95	4.61	-49.263	4.306	0.481	q1_ao_1_e3_10_57_0040_7_0007_12_0027
-4723.67	4.539	-52.77	4.25	0.481	q1_ao_1_e3_10_57_0040_7_0025_12_0016
-4725.23	5.065	-54.919	4.346	0.481	q1_ao_1_e3_10_69_0021_9_0018_14_0037
-4727.03	5.16	-49.073	4.289	0.481	q1_ao_1_e3_10_70_0034_9_0027_15_0009
-4719.3	6.221	-52.773	4.348	0.481	q1_ao_1_e3_10_76_0021_10_0035_17_0003
-4717.71	6.21	-51.85	4.36	0.481	q1_ao_1_e3_10_76_0021_10_0035_17_0010
-4714.53	6.451	-48.639	4.346	0.481	q1_ao_1_e3_10_76_0021_10_0035_17_0012
-4709.39	6.425	-46.145	4.336	0.481	q1_ao_1_e3_10_82_0027_11_0016_19_0008
-4715.87	6.596	-47.235	4.335	0.481	q1_ao_1_e3_10_87_0002_12_0011_19_0022
-4715.03	6.718	-47.517	4.34	0.481	q1_ao_1_e3_10_87_0002_12_0011_19_0039
-4713.95	6.84	-43.784	4.327	0.481	q1_ao_1_e3_10_87_0002_12_0023_19_0017
-4724.07	6.622	-44.565	4.256	0.481	q1_ao_1_e3_10_8_0027_11_0020_19_0011
-4717.78	6.382	-44.39	4.252	0.481	q1_ao_1_e3_10_8_0027_11_0020_19_0013
-4709.73	6.295	-44.13	4.278	0.481	q1_ao_1_e3_10_8_0027_11_0020_19_0020
-4710.7	6.624	-44.807	4.285	0.481	q1_ao_1_e3_10_8_0027_11_0020_19_0027
-4724.04	6.696	-44.53	4.29	0.481	q1_ao_1_e3_10_8_0027_11_0020_19_0034
-4713.85	6.427	-45.895	4.286	0.481	q1_ao_1_e3_10_8_0027_11_0029_19_0001
-4715.7	6.437	-47.3	4.3	0.481	q1_ao_1_e3_10_8_0027_11_0029_19_0023
-4715.4	6.468	-47.356	4.297	0.481	q1_ao_1_e3_10_8_0027_11_0029_19_0025
-4713.15	6.467	-45.131	4.288	0.481	q1_ao_1_e3_10_8_0027_11_0029_19_0026
-4707.28	6.598	-42.727	4.245	0.481	q1_ao_1_e3_10_16_0016_1_0002
-4726.82	6.053	-46.139	4.238	0.481	q1_ao_1_e3_10_16_0016_1_0011
-4709.92	6.545	-44.9	4.298	0.481	q1_ao_1_e3_10_16_0016_1_0017
-4723.66	6.848	-44.571	4.322	0.481	q1_ao_1_e3_10_16_0016_1_0018
-4722.08	6.553	-44.037	4.273	0.481	q1_ao_1_e3_10_18_0028_1_0001
-4723.53	6.629	-44.766	4.32	0.481	q1_ao_1_e3_10_94_0009_13_0024_20_0012
-4712.42	6.397	-46.664	4.31	0.481	q1_ao_1_e3_10_94_0009_13_0024_20_0016
-4707.87	6.504	-46.789	4.321	0.481	q1_ao_1_e3_10_94_0009_13_0024_20_0018
-4725.37	6.463	-44.204	4.299	0.481	q1_ao_1_e3_10_94_0009_13_0024_20_0023
-4711.57	7.67	-32.715	4.29	0.481	q1_ao_1_e3_1_14_0040_14_0035_22_0030
-4711.32	7.77	-32.777	4.314	0.481	q1_ao_1_e3_1_15_0004_14_0031_22_0006
-4710.74	7.782	-31.02	4.289	0.481	q1_ao_1_e3_1_15_0004_14_0031_22_0036
-4709.01	7.843	-32.375	4.327	0.481	q1_ao_1_e3_1_15_0035_15_0012_22_0013
-4712.98	7.893	-33.819	4.306	0.481	q1_ao_1_e3_1_20_0035_15_0008_22_0040
-4711.39	8.012	-32.873	4.328	0.481	q1_ao_1_e3_1_20_0035_15_0009_23_0007
-4713.37	7.388	-33.495	4.297	0.481	q1_ao_1_e3_1_2_0022_15_0020_23_0016
-4716.9	7.544	-39.315	4.307	0.481	q1_ao_1_e3_1_74_0009_22_0036_27_0039
-4708.19	7.801	-28.777	4.297	0.481	q1_ao_1_e3_1_95_0012_24_0017_30_0005
-4717.1	4.428	-43.992	4.296	0.481	q1_ao_1_e3_2_14_0005_26_0004_32_0016
-4725.86	4.317	-47.491	4.307	0.481	q1_ao_1_e3_2_14_0005_26_0011_32_0021
-4726.6	3.908	-51.511	4.298	0.481	q1_ao_1_e3_2_14_0005_26_0011_32_0038
-4719.78	3.939	-47.288	4.32	0.481	q1_ao_1_e3_2_14_0005_26_0020_32_0035
-4712.57	7.528	-33.51	4.323	0.481	q1_ao_1_e3_2_37_0029_29_0039_35_0030
-4709.91	7.833	-30.339	4.267	0.481	q1_ao_1_e3_2_67_0028_33_0020_37_0008
-4708.24	7.612	-30.841	4.325	0.481	q1_ao_1_e3_2_67_0028_33_0024_38_0009
-4712.65	8.021	-32.759	4.285	0.481	q1_ao_1_e3_2_67_0028_33_0040_38_0029
-4713.16	7.694	-34.008	4.323	0.481	q1_ao_1_e3_2_67_0028_33_0040_38_0036
-4712.76	7.715	-35.869	4.326	0.481	q1_ao_1_e3_2_87_0026_35_0033_39_0024
-4707.71	8.022	-30.57	4.313	0.481	q1_ao_1_e3_3_1_0037_36_0002_39_0016
-4718.72	6.564	-44.05	4.284	0.481	q1_ao_1_e3_10_28_0003_3_0001
-4710.07	6.263	-43.54	4.294	0.481	q1_ao_1_e3_10_28_0003_3_0011
-4715.47	6.312	-47.997	4.311	0.481	q1_ao_1_e3_10_28_0003_3_0027
-4713.66	6.451	-46.672	4.302	0.481	q1_ao_1_e3_10_28_0003_3_0029
-4709.14	7.922	-29.607	4.313	0.481	q1_ao_1_e3_3_1_0037_36_0012_40_0006
-4704.28	8.121	-49.448	4.385	0.481	q1_ao_1_e3_3_22_0010_37_0024_42_0038
-4710.28	7.868	-30.855	4.302	0.481	q1_ao_1_e3_3_27_0007_38_0007_43_0015
-4709.07	7.519	-33.375	4.302	0.481	q1_ao_1_e3_3_3_0004_38_0019_43_0014
-4710.39	7.782	-32.44	4.315	0.481	q1_ao_1_e3_3_43_0014_40_0028_45_0008
-4710.31	7.638	-33.465	4.317	0.481	q1_ao_1_e3_3_43_0014_40_0028_45_0012
-4712.39	7.443	-34.358	4.307	0.481	q1_ao_1_e3_3_61_0027_42_0001_47_0029
-4717.97	4.166	-43.249	4.299	0.481	q1_ao_1_e3_3_66_0034_43_0001_49_0024
-4710.09	7.719	-35.867	4.309	0.481	q1_ao_1_e3_3_70_0035_43_0010_49_0028
-4716.44	6.755	-48.423	4.338	0.481	q1_ao_1_e3_10_34_0018_3_0008_4_0004
-4711.58	6.823	-47.145	4.34	0.481	q1_ao_1_e3_10_34_0018_3_0011_4_0006
-4723.81	6.743	-48.231	4.342	0.481	q1_ao_1_e3_10_34_0018_3_0011_4_0020
-4717.21	6.482	-48.533	4.323	0.481	q1_ao_1_e3_10_34_0018_3_0034_4_0033
-4716.92	6.848	-47.34	4.326	0.481	q1_ao_1_e3_10_34_0018_3_0034_4_0035
-4716.61	6.725	-48.069	4.327	0.481	q1_ao_1_e3_10_34_0018_3_0034_4_0039
-4722.25	3.772	-52.503	4.268	0.481	q1_ao_1_e3_10_34_0020_4_0016_4_0011
-4725.98	3.75	-54.264	4.254	0.481	q1_ao_1_e3_10_34_0020_4_0016_4_0012
-4726.62	3.833	-54.701	4.261	0.481	q1_ao_1_e3_10_34_0020_4_0016_4_0022
-4725.39	3.71	-53.872	4.257	0.481	q1_ao_1_e3_10_34_0020_4_0016_4_0028
-4724.17	3.741	-53.659	4.26	0.481	q1_ao_1_e3_10_34_0020_4_0016_4_0033
-4723.94	3.919	-52.526	4.265	0.481	q1_ao_1_e3_10_34_0020_4_0016_4_0038
-4711.84	7.892	-34.598	4.304	0.481	q1_ao_1_e3_3_70_0035_43_0034_50_0027
-4714.52	7.443	-36.503	4.268	0.481	q1_ao_1_e3_3_75_0037_44_0017_50_0039
-4705.39	7.73	-32.881	4.303	0.481	q1_ao_1_e3_3_75_0037_44_0028_51_0007
-4713.98	7.281	-37.255	4.291	0.481	q1_ao_1_e3_3_75_0037_44_0036_51_0035
-4710.4	7.669	-36.063	4.312	0.481	q1_ao_1_e3_3_77_0010_44_0027_51_0015
-4715.03	3.956	-40.083	4.367	0.481	q1_ao_1_e3_3_93_0040_46_0038_55_0035
-4708.57	7.689	-30.204	4.271	0.481	q1_ao_1_e3_3_94_0021_47_0008_56_0019
-4725.77	4.741	-56.022	4.121	0.481	q1_ao_1_e3_4_23_0012_49_0015_57_0026
-4704.32	3.917	-55.158	4.107	0.481	q1_ao_1_e3_4_23_0012_49_0024_57_0009
-4724.78	6.957	-47.465	4.333	0.481	q1_ao_1_e3_10_34_0028_4_0013_5_0001
-4708.83	6.605	-43.557	4.282	0.481	q1_ao_1_e3_10_35_0009_4_0007_5_0006
-4725.83	6.487	-47.549	4.328	0.481	q1_ao_1_e3_10_35_0009_4_0007_5_0012
-4724.65	6.144	-45.188	4.297	0.481	q1_ao_1_e3_10_35_0009_4_0007_5_0032
-4724.91	4.61	-49.142	4.303	0.481	q1_ao_1_e3_10_35_0009_4_0027_5_0009
-4722.92	4.685	-47.689	4.295	0.481	q1_ao_1_e3_10_35_0009_4_0027_5_0025
-4724.33	4.53	-49.256	4.311	0.481	q1_ao_1_e3_10_35_0009_4_0027_5_0033
-4726.03	4.189	-48.319	4.288	0.481	q1_ao_1_e3_10_35_0009_4_0027_5_0040
-4706.9	6.376	-45.923	4.308	0.481	q1_ao_1_e3_10_35_0028_4_0021_5_0008
-4713.4	6.412	-44.215	4.302	0.481	q1_ao_1_e3_10_35_0028_4_0025_5_0006
-4711.5	6.596	-44.259	4.308	0.481	q1_ao_1_e3_10_35_0028_4_0025_5_0018
-4712.16	7.68	-33.901	4.319	0.481	q1_ao_1_e3_5_23_0026_58_0040_62_0016
-4713.91	7.636	-37.909	4.31	0.481	q1_ao_1_e3_5_25_0013_58_0017_63_0034
-4711.72	7.844	-33.258	4.31	0.481	q1_ao_1_e3_5_49_0010_60_0010_63_0012
-4712.23	7.97	-34.491	4.311	0.481	q1_ao_1_e3_5_70_0023_63_0004_67_0036
-4711.73	7.803	-32.381	4.301	0.481	q1_ao_1_e3_5_81_0008_64_0010_69_0021
-4712.65	7.768	-32.138	4.298	0.481	q1_ao_1_e3_5_81_0008_64_0018_69_0036
-4722.77	6.455	-46.142	4.334	0.481	q1_ao_1_e3_10_38_0033_4_0013_6_0001
-4725.53	6.502	-49.135	4.349	0.481	q1_ao_1_e3_10_38_0033_4_0013_6_0007
-4725.11	6.476	-48.428	4.349	0.481	q1_ao_1_e3_10_38_0033_4_0013_6_0009
-4728.99	6.31	-50.638	4.326	0.481	q1_ao_1_e3_10_38_0033_4_0013_6_0019
-4725	6.81	-47.196	4.354	0.481	q1_ao_1_e3_10_38_0033_4_0013_6_0031
-4725.31	6.694	-47.198	4.345	0.481	q1_ao_1_e3_10_38_0033_4_0013_6_0036
-4725.75	6.634	-47.198	4.346	0.481	q1_ao_1_e3_10_38_0033_4_0013_6_0039
-4711.87	7.883	-34.654	4.288	0.481	q1_ao_1_e3_5_9_0025_65_0008_71_0031
-4728.27	3.947	-54.684	4.224	0.481	q1_ao_1_e3_6_38_0024_69_0030_79_0004
-4720.59	3.733	-49.427	4.392	0.481	q1_ao_1_e3_6_41_0031_70_0018_80_0035
-4716.35	5.374	-43.106	4.294	0.481	q1_ao_1_e3_6_56_0025_72_0025_83_0015
-4723.71	4.818	-51.187	4.269	0.481	q1_ao_1_e3_6_80_0007_74_0031_86_0016
-4702.46	6.368	-45.468	4.325	0.481	q1_ao_1_e3_10_43_0040_5_0027_8_0004
-4713.91	6.493	-43.771	4.306	0.481	q1_ao_1_e3_10_43_0040_5_0027_8_0005
-4718.71	6.444	-47.007	4.332	0.481	q1_ao_1_e3_10_43_0040_5_0027_8_0010
-4716.43	6.495	-45.686	4.323	0.481	q1_ao_1_e3_10_43_0040_5_0027_8_0021
-4718.46	6.922	-41.149	4.342	0.481	q1_ao_1_e3_7_69_0008_81_0033_92_0018
-4716.68	7.727	-38.974	4.362	0.481	q1_ao_1_e3_7_79_0026_82_0037_93_0017
-4707.06	7.537	-32.863	4.398	0.481	q1_ao_1_e3_7_93_0014_83_0034_93_0035
-4694.78	5.853	-46.047	4.391	0.481	q1_ao_1_e3_8_2_0023_85_0003_94_0039
-4718.06	3.871	-44.147	4.208	0.481	q1_ao_1_e3_8_2_0023_85_0008_94_0020
-4713.95	5.922	-46.05	4.316	0.481	q1_ao_1_e3_10_43_0040_5_0034_9_0003
-4714.36	6.067	-46.769	4.325	0.481	q1_ao_1_e3_10_43_0040_5_0034_9_0006
-4714.94	5.905	-47.418	4.321	0.481	q1_ao_1_e3_10_43_0040_5_0034_9_0012
-4700.75	5.993	-46.277	4.313	0.481	q1_ao_1_e3_10_43_0040_5_0034_9_0016
-4697.36	6.181	-45.114	4.314	0.481	q1_ao_1_e3_10_43_0040_5_0034_9_0022
-4715.82	6.074	-46.032	4.318	0.481	q1_ao_1_e3_10_43_0040_5_0034_9_0024
-4710.87	3.631	-49.746	4.416	0.481	q1_ao_1_e3_10_43_0040_5_0034_9_0038
-4725.21	5.865	-47.532	4.286	0.481	q1_ao_1_e3_10_45_0035_5_0033_9_0013
-4720.66	6.117	-51.234	4.308	0.481	q1_ao_1_e3_10_56_0034_7_0009_12_0004_12_0024
-4715.83	6.402	-47.38	4.303	0.481	q1_ao_1_e3_10_56_0034_7_0009_12_0004_12_0033
-4719.79	6.032	-49.314	4.298	0.481	q1_ao_1_e3_10_56_0034_7_0009_12_0012_12_0010
-4719.1	6.225	-48.347	4.306	0.481	q1_ao_1_e3_10_56_0034_7_0009_12_0012_12_0019
-4725.31	5.132	-50.016	4.319	0.481	q1_ao_1_e3_10_56_0034_7_0015_12_0013_12_0002
-4726.89	5.381	-50.507	4.329	0.481	q1_ao_1_e3_10_56_0034_7_0015_12_0013_12_0032
-4727.19	5.18	-50.625	4.312	0.481	q1_ao_1_e3_10_56_0034_7_0015_12_0016_13_0016
-4723.42	5.806	-51.081	4.315	0.481	q1_ao_1_e3_10_56_0034_7_0015_12_0024_13_0007
-4723.63	5.671	-50.562	4.334	0.481	q1_ao_1_e3_10_56_0034_7_0015_12_0024_13_0033
-4726.63	5.595	-50.464	4.327	0.481	q1_ao_1_e3_10_56_0034_7_0015_12_0040_13_0005
-4726.16	5.5	-50.033	4.324	0.481	q1_ao_1_e3_10_56_0034_7_0015_12_0040_13_0028
-4723.4	5.842	-49.627	4.335	0.481	q1_ao_1_e3_10_56_0034_7_0015_12_0040_13_0034
-4708.84	7.767	-50.984	4.288	0.481	q1_ao_1_e3_10_7_0006_9_0038_15_0016_14_0033
-4726.88	6.205	-51.542	4.345	0.481	q1_ao_1_e3_10_76_0021_10_0035_17_0003_15_0007
-4716.36	6.368	-50.268	4.364	0.481	q1_ao_1_e3_10_76_0021_10_0035_17_0010_15_0004
-4716.24	6.271	-50.002	4.366	0.481	q1_ao_1_e3_10_76_0021_10_0035_17_0010_15_0007
-4714.87	6.216	-50.984	4.355	0.481	q1_ao_1_e3_10_76_0021_10_0035_17_0010_15_0010
-4714.29	6.457	-49.748	4.356	0.481	q1_ao_1_e3_10_76_0021_10_0035_17_0010_15_0024
-4723.55	6.344	-49.941	4.354	0.481	q1_ao_1_e3_10_76_0021_10_0035_17_0010_15_0027
-4715.83	7.006	-47.941	4.331	0.481	q1_ao_1_e3_10_8_0027_11_0020_19_0017_17_0005
-4716.48	6.586	-48.374	4.328	0.481	q1_ao_1_e3_10_8_0027_11_0020_19_0017_17_0031
-4718.04	3.629	-45.489	4.37	0.481	q1_ao_1_e3_10_92_0002_12_0009_19_0030_18_0011
-4725.16	6.771	-48.449	4.345	0.481	q1_ao_1_e3_10_34_0018_3_0011_4_0038_1_0018
-4724.01	6.54	-47.133	4.326	0.481	q1_ao_1_e3_10_34_0018_3_0011_4_0038_1_0023
-4725.69	6.871	-49.466	4.349	0.481	q1_ao_1_e3_10_34_0018_3_0011_4_0038_1_0025
-4722.35	3.575	-51.435	4.266	0.481	q1_ao_1_e3_10_34_0020_4_0016_4_0011_1_0025
-4721.73	3.665	-51.383	4.263	0.481	q1_ao_1_e3_10_34_0020_4_0016_4_0022_1_0002
-4725.65	3.746	-54.498	4.259	0.481	q1_ao_1_e3_10_34_0020_4_0016_4_0022_1_0016
-4725.4	3.722	-54.253	4.255	0.481	q1_ao_1_e3_10_34_0020_4_0016_4_0038_1_0006
-4700.76	3.297	-52.095	4.17	0.481	q1_ao_1_e3_10_34_0020_4_0016_4_0038_1_0012
-4725.3	3.657	-54.168	4.254	0.481	q1_ao_1_e3_10_34_0020_4_0016_4_0038_1_0020
-4725.24	3.782	-52.282	4.256	0.481	q1_ao_1_e3_10_34_0020_4_0016_4_0038_1_0029
-4707.88	4.261	-37.664	4.304	0.481	q1_ao_1_e3_1_28_0031_16_0018_24_0001_21_0028
-4728.27	3.333	-54.656	4.318	0.481	q1_ao_1_e3_2_14_0005_26_0011_32_0038_26_0027
-4718.41	6.137	-49.111	4.315	0.481	q1_ao_1_e3_10_34_0020_4_0034_4_0008_2_0001
-4719.15	6.201	-49.77	4.312	0.481	q1_ao_1_e3_10_34_0020_4_0034_4_0008_2_0019
-4722.2	6.141	-51.267	4.307	0.481	q1_ao_1_e3_10_34_0020_4_0034_4_0037_2_0023
-4721.18	5.918	-46.494	4.349	0.481	q1_ao_1_e3_10_34_0020_4_0039_4_0003_2_0028
-4713.44	4.222	-43.326	4.281	0.481	q1_ao_1_e3_2_50_0036_31_0020_37_0018_33_0006
-4722.73	6.544	-45.739	4.339	0.481	q1_ao_1_e3_10_38_0033_4_0013_6_0019_3_0007
-4725.43	6.577	-47.067	4.358	0.481	q1_ao_1_e3_10_38_0033_4_0013_6_0019_3_0023
-4723.86	6.915	-46.139	4.356	0.481	q1_ao_1_e3_10_38_0033_4_0013_6_0019_3_0035
-4726.46	6.485	-48.789	4.346	0.481	q1_ao_1_e3_10_38_0033_4_0013_6_0019_3_0039
-4728.5	6.319	-48.357	4.236	0.481	q1_ao_1_e3_10_4_0026_5_0003_6_0011_4_0028
-4722.25	8.274	-47.255	4.277	0.481	q1_ao_1_e3_10_4_0026_5_0003_6_0020_4_0031
-4712.6	3.92	-39.537	4.337	0.481	q1_ao_1_e3_3_93_0040_46_0028_55_0031_54_0024
-4714.2	3.67	-47.633	4.32	0.481	q1_ao_1_e3_3_93_0040_46_0038_55_0018_54_0006
-4723.78	4.493	-53.353	4.137	0.481	q1_ao_1_e3_4_23_0012_49_0015_57_0012_57_0031
-4698.38	4.444	-53.395	4.112	0.481	q1_ao_1_e3_4_23_0012_49_0024_57_0009_57_0031
-4708.52	8.033	-53.488	4.306	0.481	q1_ao_1_e3_10_4_0026_5_0033_7_0019_5_0029
-4724.34	6.772	-50.298	4.305	0.481	q1_ao_1_e3_10_4_0026_5_0033_7_0031_5_0015
-4716.02	7.009	-38.831	4.326	0.481	q1_ao_1_e3_5_10_0003_56_0004_61_0019_64_0004
-4721.29	7.394	-46.039	4.366	0.481	q1_ao_1_e3_5_60_0019_62_0039_65_0011_67_0004
-4715.93	7.736	-41.165	4.391	0.481	q1_ao_1_e3_5_60_0019_62_0039_65_0011_67_0024
-4714.65	5.805	-41.267	4.367	0.481	q1_ao_1_e3_5_75_0021_63_0002_68_0008_68_0006
-4714.52	3.832	-44.301	4.389	0.481	q1_ao_1_e3_5_75_0021_63_0002_68_0025_68_0036
-4718.21	3.23	-49.32	4.412	0.481	q1_ao_1_e3_10_42_0035_5_0015_8_0002_6_0013
-4719.33	3.206	-49.775	4.384	0.481	q1_ao_1_e3_10_42_0035_5_0015_8_0002_6_0016
-4722.37	3.159	-53.398	4.397	0.481	q1_ao_1_e3_10_42_0035_5_0015_8_0013_6_0002
-4719.38	3.078	-50.285	4.426	0.481	q1_ao_1_e3_10_42_0035_5_0015_8_0013_6_0009
-4720.38	3.052	-51.546	4.427	0.481	q1_ao_1_e3_10_42_0035_5_0015_8_0017_6_0015
-4712.61	3.377	-48.624	4.406	0.481	q1_ao_1_e3_10_42_0035_5_0015_8_0017_6_0025
-4716.82	3.369	-51.122	4.385	0.481	q1_ao_1_e3_10_42_0035_5_0015_8_0025_6_0002
-4716.1	3.222	-50.209	4.42	0.481	q1_ao_1_e3_10_42_0035_5_0015_8_0032_6_0034
-4718.26	2.761	-47.686	4.474	0.481	q1_ao_1_e3_5_80_0023_64_0034_68_0031_71_0002
-4715.41	7.918	-37.145	4.339	0.481	q1_ao_1_e3_5_83_0005_64_0007_69_0018_71_0028
-4711.84	8.814	-36.386	4.376	0.481	q1_ao_1_e3_6_15_0001_66_0008_73_0031_73_0036
-4720.92	3.791	-49.251	4.252	0.481	q1_ao_1_e3_6_28_0008_67_0008_74_0007_75_0008
-4717.13	4.164	-47.424	4.278	0.481	q1_ao_1_e3_6_28_0008_67_0028_74_0010_76_0005
-4722.89	3.175	-54.619	4.4	0.481	q1_ao_1_e3_10_42_0035_5_0015_8_0040_7_0011
-4717.96	3.404	-51.344	4.44	0.481	q1_ao_1_e3_10_42_0035_5_0015_8_0040_7_0021
-4727.39	3.134	-56.66	4.388	0.481	q1_ao_1_e3_10_42_0035_5_0015_8_0040_7_0030
-4725.76	3.045	-56.963	4.385	0.481	q1_ao_1_e3_10_42_0035_5_0015_8_0040_7_0032
-4719.71	3.286	-52.435	4.397	0.481	q1_ao_1_e3_10_42_0035_5_0015_8_0040_7_0036
-4726.06	7.18	-46.915	4.311	0.481	q1_ao_1_e3_10_43_0032_5_0038_8_0023_7_0010
-4720.32	3.901	-51.351	4.275	0.481	q1_ao_1_e3_6_56_0025_72_0036_83_0001_85_0022
-4715.07	7.381	-42.596	4.349	0.481	q1_ao_1_e3_6_66_0021_73_0024_85_0001_86_0016
-4717.26	7.423	-42.581	4.306	0.481	q1_ao_1_e3_6_66_0021_73_0026_85_0014_87_0017
-4699.12	3.884	-49.627	4.184	0.481	q1_ao_1_e3_6_80_0007_74_0004_86_0032_87_0003
-4725.44	3.932	-52.091	4.271	0.481	q1_ao_1_e3_6_80_0007_74_0031_86_0016_87_0034
-4724.28	6.168	-52.816	4.275	0.481	q1_ao_1_e3_6_80_0007_74_0031_86_0016_87_0036
-4723.18	4.668	-51.293	4.297	0.481	q1_ao_1_e3_6_80_0007_74_0031_86_0021_87_0018
-4723.02	3.041	-50.992	4.291	0.481	q1_ao_1_e3_7_3_0006_78_0012_88_0008_89_0025
-4710.03	6.472	-35.314	4.363	0.481	q1_ao_1_e3_7_93_0014_83_0014_93_0004_95_0032
-4709.54	7.564	-33.624	4.383	0.481	q1_ao_1_e3_8_29_0015_86_0001_95_0023_96_0004
-4720.08	6.391	-52.856	4.438	0.481	q1_ao_1_e3_8_2_0023_85_0003_94_0040_96_0010
-4721.27	6.243	-53.045	4.43	0.481	q1_ao_1_e3_8_2_0023_85_0003_94_0040_96_0025
-4713.03	7.179	-38.773	4.41	0.481	q1_ao_1_e3_8_2_0023_85_0025_95_0030_96_0027
-4709.54	4.13	-49.864	4.359	0.481	q1_ao_1_e3_8_70_0030_90_0038_97_0003_98_0011
-4708.52	7.496	-33.954	4.363	0.468	q1_ao_1_e3_6_11_0006
-4699.12	8.841	-44.166	4.301	0.468	q1_ao_1_e3_1_15_0004
-4712.4	6.801	-41.067	4.273	0.468	q1_ao_1_e3_10_16_0016
-4718.59	6.535	-45.315	4.281	0.468	q1_ao_1_e3_10_18_0028
-4702.05	6.424	-41.593	4.251	0.468	q1_ao_1_e3_10_18_0032
-4714.39	8.923	-43.854	4.309	0.468	q1_ao_1_e3_1_20_0035
-4718.65	8.646	-50.525	4.378	0.468	q1_ao_1_e3_3_22_0010
-4708.54	4.17	-42.696	4.182	0.468	q1_ao_1_e3_4_23_0012
-4711.22	8.604	-46.723	4.332	0.468	q1_ao_1_e3_5_23_0026
-4698.21	8.752	-45.578	4.3	0.468	q1_ao_1_e3_5_23_0028
-4718.6	8.351	-47.299	4.314	0.468	q1_ao_1_e3_3_27_0007
-4699.97	8.899	-43.976	4.305	0.468	q1_ao_1_e3_1_2_0022
-4701.06	8.274	-36.036	4.333	0.468	q1_ao_1_e3_7_30_0031
-4693.36	8.908	-41.162	4.332	0.468	q1_ao_1_e3_5_32_0032
-4703.39	9.95	-30.424	4.354	0.468	q1_ao_1_e3_6_32_0002
-4700.39	6.786	-40.027	4.232	0.468	q1_ao_1_e3_10_34_0020
-4715.58	6.943	-42.167	4.305	0.468	q1_ao_1_e3_10_34_0028
-4705.75	6.91	-33.722	4.345	0.468	q1_ao_1_e3_6_36_0030
-4706.72	7.326	-32.752	4.347	0.468	q1_ao_1_e3_4_38_0001
-4694.27	8.645	-44.006	4.304	0.468	q1_ao_1_e3_3_3_0004
-4701.52	6.933	-36.967	4.279	0.468	q1_ao_1_e3_10_42_0035
-4711.22	6.431	-42.866	4.3	0.468	q1_ao_1_e3_10_43_0040
-4699.84	8.318	-44.661	4.299	0.468	q1_ao_1_e3_3_43_0014
-4695.9	8.11	-40.012	4.335	0.468	q1_ao_1_e3_4_43_0025
-4705.39	6.728	-37.404	4.33	0.468	q1_ao_1_e3_6_45_0013
-4704.15	7.537	-33.718	4.36	0.468	q1_ao_1_e3_6_46_0019
-4713.77	6.735	-44.39	4.303	0.468	q1_ao_1_e3_10_54_0014
-4708.4	6.87	-43.526	4.236	0.468	q1_ao_1_e3_10_56_0034
-4707.43	8.095	-40.223	4.389	0.468	q1_ao_1_e3_6_56_0011
-4691.07	10.585	-35.048	4.375	0.468	q1_ao_1_e3_10_57_0040
-4698.33	8.419	-42.319	4.322	0.468	q1_ao_1_e3_7_5_0022
-4715.92	10.217	-45.194	4.406	0.468	q1_ao_1_e3_6_60_0030
-4692.04	8.409	-39.944	4.312	0.468	q1_ao_1_e3_3_61_0027
-4718.13	8.619	-46.366	4.291	0.468	q1_ao_1_e3_3_65_0035
-4718.02	8.703	-50.393	4.354	0.468	q1_ao_1_e3_6_66_0021
-4711.78	6.655	-41.447	4.276	0.468	q1_ao_1_e3_10_67_0014
-4714.36	8.92	-43.858	4.302	0.468	q1_ao_1_e3_2_67_0028
-4710.21	9.315	-38.275	4.31	0.468	q1_ao_1_e3_3_6_0015
-4713.39	8.66	-45.28	4.325	0.468	q1_ao_1_e3_3_70_0035
-4706.69	6.643	-31.456	4.345	0.468	q1_ao_1_e3_6_72_0039
-4692.27	8.664	-45.034	4.298	0.468	q1_ao_1_e3_3_75_0037
-4716.09	8.995	-45.507	4.328	0.468	q1_ao_1_e3_3_77_0010
-4709.97	7.777	-35.803	4.299	0.468	q1_ao_1_e3_6_77_0013
-4703.52	7.135	-43.349	4.295	0.468	q1_ao_1_e3_10_82_0027
-4710.29	6.626	-42.115	4.306	0.468	q1_ao_1_e3_10_87_0002
-4692.5	8.751	-34.632	4.386	0.468	q1_ao_1_e3_4_92_0039
-4710.41	6.678	-42.885	4.31	0.468	q1_ao_1_e3_10_93_0024
-4713.5	6.713	-41.791	4.297	0.468	q1_ao_1_e3_10_94_0009
-4715.22	8.661	-44.03	4.307	0.468	q1_ao_1_e3_5_94_0026
-4705.57	8.707	-42.591	4.306	0.468	q1_ao_1_e3_1_95_0012
-4700.16	8.69	-46.794	4.328	0.468	q1_ao_1_e3_5_9_0025
-4716.02	6.079	-44.325	4.286	0.468	q1_ao_1_e3_9_82_0009_100_0030
-4720.62	6.538	-43.209	4.312	0.468	q1_ao_1_e3_10_76_0021_10_0005
-4701.37	6.449	-45.279	4.333	0.468	q1_ao_1_e3_10_76_0021_10_0014
-4723.41	6.256	-45.218	4.299	0.468	q1_ao_1_e3_10_76_0021_10_0021
-4726.03	3.463	-49.429	4.416	0.468	q1_ao_1_e3_10_76_0021_10_0028
-4705.87	6.971	-39.606	4.277	0.468	q1_ao_1_e3_10_76_0032_10_0008
-4715.57	8.736	-43.395	4.219	0.468	q1_ao_1_e3_10_78_0023_11_0034
-4712.63	6.307	-46.749	4.324	0.468	q1_ao_1_e3_10_82_0027_11_0016
-4697.48	6.937	-44.835	4.333	0.468	q1_ao_1_e3_10_82_0027_11_0036
-4700.39	7.316	-39.92	4.258	0.468	q1_ao_1_e3_10_8_0027_11_0015
-4716.07	6.856	-44.415	4.328	0.468	q1_ao_1_e3_10_87_0002_12_0020
-4712.7	7.353	-44.212	4.315	0.468	q1_ao_1_e3_10_87_0002_12_0034
-4707.56	6.875	-45.915	4.324	0.468	q1_ao_1_e3_10_87_0012_12_0018
-4707.85	9.454	-32.709	4.388	0.468	q1_ao_1_e3_10_89_0018_12_0007
-4705.7	6.682	-43.028	4.245	0.468	q1_ao_1_e3_10_91_0016_12_0006
-4703.98	6.54	-41.376	4.256	0.468	q1_ao_1_e3_10_91_0016_12_0032
-4720.08	6.464	-42.83	4.255	0.468	q1_ao_1_e3_10_91_0016_12_0037
-4702.52	7.335	-40.425	4.271	0.468	q1_ao_1_e3_10_93_0017_12_0010
-4726.09	5.489	-46.864	4.293	0.468	q1_ao_1_e3_10_93_0023_13_0033
-4713.8	6.449	-46.071	4.313	0.468	q1_ao_1_e3_10_93_0024_13_0023
-4709.21	10.929	-38.765	4.373	0.468	q1_ao_1_e3_10_98_0026_13_0021
-4712.27	8.427	-33.635	4.359	0.468	q1_ao_1_e3_1_100_0018_13_0013
-4701.98	8.489	-43.705	4.307	0.468	q1_ao_1_e3_1_15_0004_14_0002
-4720.7	8.721	-45.018	4.331	0.468	q1_ao_1_e3_1_15_0004_14_0018
-4721.39	8.804	-45.809	4.324	0.468	q1_ao_1_e3_1_15_0004_14_0020
-4706.84	8.822	-47.228	4.315	0.468	q1_ao_1_e3_1_15_0004_14_0031
-4722.51	8.968	-46.423	4.322	0.468	q1_ao_1_e3_1_15_0004_14_0032
-4723.26	8.894	-47.016	4.31	0.468	q1_ao_1_e3_1_15_0004_14_0037
-4720.37	8.879	-44.725	4.31	0.468	q1_ao_1_e3_1_15_0035_15_0002
-4720.74	8.767	-45.505	4.314	0.468	q1_ao_1_e3_1_15_0035_15_0017
-4715.43	7.529	-38.826	4.333	0.468	q1_ao_1_e3_1_15_0035_15_0020
-4718.78	8.526	-45.338	4.318	0.468	q1_ao_1_e3_1_15_0035_15_0030
-4719.41	9.046	-45.196	4.317	0.468	q1_ao_1_e3_1_15_0035_15_0032
-4721.92	8.713	-46.158	4.312	0.468	q1_ao_1_e3_1_20_0035_15_0001
-4713.96	8.808	-44.937	4.305	0.468	q1_ao_1_e3_1_20_0035_15_0004
-4722.37	8.892	-46.425	4.331	0.468	q1_ao_1_e3_1_20_0035_15_0008
-4720.28	8.488	-45.542	4.31	0.468	q1_ao_1_e3_1_20_0035_15_0017
-4720.77	8.718	-46.789	4.315	0.468	q1_ao_1_e3_1_20_0035_15_0029
-4717.92	8.585	-45.445	4.341	0.468	q1_ao_1_e3_1_20_0035_15_0030
-4717.66	8.384	-43.579	4.321	0.468	q1_ao_1_e3_1_20_0035_15_0033
-4719.96	8.514	-44.773	4.314	0.468	q1_ao_1_e3_1_20_0035_15_0038
-4708.24	8.303	-45.151	4.301	0.468	q1_ao_1_e3_1_2_0022_15_0003
-4708.23	8.616	-43.647	4.33	0.468	q1_ao_1_e3_1_2_0022_15_0006
-4711.61	8.934	-45.986	4.33	0.468	q1_ao_1_e3_1_2_0022_15_0009
-4710.57	8.931	-45.753	4.322	0.468	q1_ao_1_e3_1_2_0022_15_0011
-4722.39	8.814	-46.039	4.321	0.468	q1_ao_1_e3_1_2_0022_15_0012
-4700.61	8.457	-45.602	4.308	0.468	q1_ao_1_e3_1_2_0022_15_0019
-4721.34	8.666	-46.544	4.313	0.468	q1_ao_1_e3_1_2_0022_15_0023
-4720.06	8.722	-45.869	4.31	0.468	q1_ao_1_e3_1_2_0022_15_0031
-4721.52	8.822	-45.3	4.338	0.468	q1_ao_1_e3_1_2_0022_15_0038
-4714.13	8.923	-44.881	4.339	0.468	q1_ao_1_e3_1_2_0022_15_0039
-4708.95	8.534	-45.265	4.318	0.468	q1_ao_1_e3_1_2_0022_15_0040
-4679.42	8.955	-27.162	4.329	0.468	q1_ao_1_e3_1_25_0013_16_0027
-4721.14	9.505	-44.44	4.396	0.468	q1_ao_1_e3_1_29_0040_16_0012
-4717.16	8.916	-42.782	4.346	0.468	q1_ao_1_e3_1_29_0040_16_0032
-4720.69	8.879	-47.933	4.362	0.468	q1_ao_1_e3_1_29_0040_16_0033
-4714.25	6.245	-40.974	4.27	0.468	q1_ao_1_e3_1_34_0030_17_0021
-4719.53	8.232	-46.029	4.399	0.468	q1_ao_1_e3_1_50_0013_19_0030
-4720.12	8.296	-46.187	4.398	0.468	q1_ao_1_e3_1_50_0013_19_0031
-4706.66	6.847	-43.28	4.262	0.468	q1_ao_1_e3_10_16_0016_1_0004
-4703.89	7.767	-40.263	4.253	0.468	q1_ao_1_e3_10_16_0016_1_0018
-4689.76	7.983	-38.169	4.322	0.468	q1_ao_1_e3_10_18_0028_1_0003
-4698.82	7.419	-41.614	4.307	0.468	q1_ao_1_e3_10_18_0028_1_0004
-4717.52	7.014	-48.465	4.263	0.468	q1_ao_1_e3_10_18_0028_1_0009
-4714.78	10.592	-37.699	4.386	0.468	q1_ao_1_e3_10_18_0028_1_0012
-4705.53	6.672	-43.335	4.303	0.468	q1_ao_1_e3_10_18_0028_1_0013
-4724.28	6.62	-44.012	4.297	0.468	q1_ao_1_e3_10_18_0028_1_0017
-4707.09	8.554	-37.893	4.377	0.468	q1_ao_1_e3_1_58_0023_20_0001
-4705.72	8.369	-36.468	4.38	0.468	q1_ao_1_e3_1_58_0023_20_0003
-4712.88	4.686	-45.512	4.199	0.468	q1_ao_1_e3_1_58_0025_20_0033
-4721.4	8.947	-45.462	4.357	0.468	q1_ao_1_e3_1_73_0001_21_0008
-4721.06	8.528	-44.686	4.358	0.468	q1_ao_1_e3_1_73_0001_21_0018
-4716.07	3.923	-42.799	4.273	0.468	q1_ao_1_e3_1_73_0004_22_0027
-4703.16	8.572	-44.205	4.298	0.468	q1_ao_1_e3_1_74_0009_22_0004
-4727.03	8.886	-50.505	4.332	0.468	q1_ao_1_e3_1_74_0009_22_0018
-4702.12	9.587	-45.233	4.312	0.468	q1_ao_1_e3_1_74_0009_22_0022
-4719.58	8.541	-47.456	4.311	0.468	q1_ao_1_e3_1_74_0009_22_0032
-4693.71	9.346	-47.326	4.309	0.468	q1_ao_1_e3_1_74_0009_22_0036
-4720.8	8.982	-46.239	4.319	0.468	q1_ao_1_e3_1_76_0025_22_0003
-4714.9	9.764	-39.087	4.376	0.468	q1_ao_1_e3_1_77_0021_22_0008
-4722.05	8.645	-46.939	4.376	0.468	q1_ao_1_e3_1_77_0021_22_0028
-4719.56	8.993	-44.331	4.319	0.468	q1_ao_1_e3_1_95_0012_24_0004
-4726.09	8.612	-49.11	4.316	0.468	q1_ao_1_e3_1_95_0012_24_0017
-4714.56	8.932	-43.767	4.334	0.468	q1_ao_1_e3_1_95_0012_24_0024
-4723.99	8.778	-44.73	4.299	0.468	q1_ao_1_e3_1_95_0012_24_0025
-4723.21	8.827	-46.572	4.329	0.468	q1_ao_1_e3_1_95_0012_24_0034
-4716.62	8.504	-44.521	4.311	0.468	q1_ao_1_e3_1_95_0012_24_0036
-4721.46	8.722	-47.136	4.322	0.468	q1_ao_1_e3_1_95_0012_24_0038
-4708.57	4.985	-34.134	4.294	0.468	q1_ao_1_e3_1_99_0013_25_0014
-4697.09	8.936	-30.515	4.282	0.468	q1_ao_1_e3_2_1_0036_25_0012
-4715.33	9.678	-38.752	4.304	0.468	q1_ao_1_e3_2_1_0036_25_0023
-4719.76	8.938	-44.021	4.29	0.468	q1_ao_1_e3_2_24_0015_27_0019
-4720.09	8.79	-44.06	4.304	0.468	q1_ao_1_e3_2_24_0015_27_0026
-4718.12	9.072	-44.906	4.332	0.468	q1_ao_1_e3_2_29_0029_28_0007
-4718.84	7.365	-39.544	4.309	0.468	q1_ao_1_e3_2_37_0029_29_0013
-4720.76	8.559	-45.923	4.335	0.468	q1_ao_1_e3_2_37_0029_29_0020
-4720.81	8.445	-45.034	4.335	0.468	q1_ao_1_e3_2_37_0029_29_0032
-4713.62	8.653	-47.183	4.31	0.468	q1_ao_1_e3_2_37_0029_29_0039
-4720.54	6.733	-42.137	4.302	0.468	q1_ao_1_e3_10_21_0030_2_0001
-4716.96	7.378	-47.754	4.332	0.468	q1_ao_1_e3_10_21_0030_2_0006
-4719.5	6.97	-41.032	4.318	0.468	q1_ao_1_e3_10_21_0030_2_0008
-4722.69	6.9	-46.426	4.321	0.468	q1_ao_1_e3_10_21_0030_2_0039
-4691.18	8.513	-35.737	4.376	0.468	q1_ao_1_e3_10_24_0008_2_0032
-4719.9	8.806	-45.423	4.416	0.468	q1_ao_1_e3_2_50_0033_31_0003
-4712.99	8.744	-50.803	4.39	0.468	q1_ao_1_e3_2_50_0036_31_0002
-4713.22	8.4	-51.435	4.39	0.468	q1_ao_1_e3_2_50_0036_31_0016
-4710.48	6.812	-37.797	4.358	0.468	q1_ao_1_e3_2_54_0019_31_0026
-4712.26	8.83	-40.612	4.315	0.468	q1_ao_1_e3_2_57_0025_32_0018
-4715.26	8.71	-38.364	4.33	0.468	q1_ao_1_e3_2_62_0010_33_0026
-4720.6	8.446	-46.046	4.322	0.468	q1_ao_1_e3_2_67_0028_33_0011
-4721.02	8.367	-46.39	4.308	0.468	q1_ao_1_e3_2_67_0028_33_0019
-4721.69	8.879	-46.337	4.335	0.468	q1_ao_1_e3_2_67_0028_33_0020
-4703.96	8.857	-47.269	4.3	0.468	q1_ao_1_e3_2_67_0028_33_0022
-4722.69	8.632	-48.006	4.315	0.468	q1_ao_1_e3_2_67_0028_33_0033
-4721.21	8.611	-45.346	4.323	0.468	q1_ao_1_e3_2_67_0028_33_0034
-4720.99	8.734	-45.627	4.329	0.468	q1_ao_1_e3_2_67_0028_33_0038
-4721.06	8.619	-46.348	4.35	0.468	q1_ao_1_e3_2_70_0030_33_0019
-4717.94	9.125	-44.045	4.307	0.468	q1_ao_1_e3_2_82_0025_34_0001
-4725.79	8.882	-47.64	4.325	0.468	q1_ao_1_e3_2_87_0026_35_0003
-4725.47	8.883	-49.946	4.317	0.468	q1_ao_1_e3_2_87_0026_35_0007
-4721.88	8.969	-45.741	4.307	0.468	q1_ao_1_e3_2_87_0026_35_0013
-4720.24	9.081	-44.743	4.297	0.468	q1_ao_1_e3_2_87_0026_35_0018
-4720.18	8.873	-46.226	4.328	0.468	q1_ao_1_e3_2_87_0026_35_0021
-4722.51	9.116	-48.211	4.331	0.468	q1_ao_1_e3_2_87_0026_35_0033
-4719.32	8.048	-42.817	4.322	0.468	q1_ao_1_e3_3_100_0018_36_0005
-4716.2	8.614	-37.267	4.407	0.468	q1_ao_1_e3_3_100_0018_36_0034
-4713.71	8.338	-38.718	4.359	0.468	q1_ao_1_e3_3_100_0036_36_0001
-4711.81	8.116	-38.807	4.38	0.468	q1_ao_1_e3_3_100_0036_36_0004
-4706.87	8.909	-38.402	4.289	0.468	q1_ao_1_e3_3_100_0036_36_0033
-4716.98	7.843	-38.944	4.334	0.468	q1_ao_1_e3_3_10_0018_36_0004
-4717.95	7.364	-40.113	4.332	0.468	q1_ao_1_e3_3_10_0037_36_0005
-4712.96	8.851	-40.368	4.346	0.468	q1_ao_1_e3_3_10_0037_36_0006
-4713.6	8.696	-40.547	4.348	0.468	q1_ao_1_e3_3_10_0037_36_0015
-4693.3	8.852	-41.78	4.355	0.468	q1_ao_1_e3_3_10_0037_36_0028
-4714.98	8.623	-40.978	4.335	0.468	q1_ao_1_e3_3_10_0037_36_0029
-4712.73	8.612	-40.919	4.348	0.468	q1_ao_1_e3_3_10_0037_36_0031
-4713.53	3.127	-42.471	4.471	0.468	q1_ao_1_e3_3_11_0002_36_0004
-4719.64	8.528	-46.111	4.307	0.468	q1_ao_1_e3_3_1_0037_36_0002
-4699.79	8.407	-45.463	4.305	0.468	q1_ao_1_e3_3_1_0037_36_0005
-4721.32	8.03	-47.899	4.326	0.468	q1_ao_1_e3_3_1_0037_36_0006
-4719.71	8.267	-46.076	4.312	0.468	q1_ao_1_e3_3_1_0037_36_0014
-4719.9	8.597	-45.367	4.319	0.468	q1_ao_1_e3_3_1_0037_36_0019
-4721.76	7.663	-44.869	4.302	0.468	q1_ao_1_e3_3_1_0037_36_0029
-4721.12	8.599	-45.734	4.327	0.468	q1_ao_1_e3_3_1_0037_36_0031
-4717.66	8.397	-45.099	4.327	0.468	q1_ao_1_e3_3_1_0037_36_0036
-4707.12	8.61	-51.164	4.385	0.468	q1_ao_1_e3_3_16_0003_37_0031
-4714.52	9.132	-49.389	4.384	0.468	q1_ao_1_e3_3_22_0010_37_0007
-4723.84	8.357	-49.422	4.369	0.468	q1_ao_1_e3_3_22_0010_37_0014
-4724.93	8.514	-51.412	4.385	0.468	q1_ao_1_e3_3_22_0010_37_0024
-4723.12	8.372	-49.429	4.383	0.468	q1_ao_1_e3_3_22_0010_37_0029
-4715.04	9.238	-41.51	4.417	0.468	q1_ao_1_e3_3_27_0002_38_0031
-4717.17	8.346	-43.333	4.331	0.468	q1_ao_1_e3_3_27_0007_38_0004
-4721.77	8.687	-46.056	4.325	0.468	q1_ao_1_e3_3_27_0007_38_0007
-4720.14	8.445	-45.535	4.31	0.468	q1_ao_1_e3_3_27_0007_38_0008
-4718.78	8.47	-44.268	4.319	0.468	q1_ao_1_e3_3_27_0007_38_0013
-4720.77	8.534	-45.397	4.319	0.468	q1_ao_1_e3_3_27_0007_38_0023
-4713.43	8.451	-39.255	4.314	0.468	q1_ao_1_e3_3_27_0007_38_0040
-4704.95	8.545	-31.826	4.348	0.468	q1_ao_1_e3_3_28_0040_38_0017
-4720.81	8.627	-45.343	4.32	0.468	q1_ao_1_e3_3_3_0004_38_0007
-4719.8	8.525	-44.656	4.33	0.468	q1_ao_1_e3_3_3_0004_38_0009
-4721.66	8.687	-45.952	4.331	0.468	q1_ao_1_e3_3_3_0004_38_0014
-4721.46	8.656	-46.652	4.326	0.468	q1_ao_1_e3_3_3_0004_38_0018
-4702.69	8.623	-46.326	4.324	0.468	q1_ao_1_e3_3_3_0004_38_0019
-4720.79	8.527	-45.539	4.323	0.468	q1_ao_1_e3_3_3_0004_38_0020
-4717.82	8.506	-44.114	4.321	0.468	q1_ao_1_e3_3_3_0004_38_0024
-4720.51	8.505	-45.889	4.309	0.468	q1_ao_1_e3_3_3_0004_38_0037
-4712.43	5.072	-43.553	4.263	0.468	q1_ao_1_e3_3_34_0005_39_0012
-4711.07	7.733	-33.52	4.312	0.468	q1_ao_1_e3_3_37_0004_39_0011
-4713.02	6.654	-47.473	4.305	0.468	q1_ao_1_e3_10_28_0003_3_0028
-4711.23	7.197	-49.715	4.333	0.468	q1_ao_1_e3_10_34_0018_3_0001
-4712.23	6.907	-48.695	4.324	0.468	q1_ao_1_e3_10_34_0018_3_0008
-4701.54	6.768	-46.249	4.311	0.468	q1_ao_1_e3_10_34_0018_3_0011
-4706.77	6.843	-47.627	4.309	0.468	q1_ao_1_e3_10_34_0018_3_0023
-4723.33	6.458	-44.913	4.286	0.468	q1_ao_1_e3_10_34_0018_3_0040
-4713.09	8.66	-41.054	4.352	0.468	q1_ao_1_e3_3_41_0008_40_0022
-4720.39	8.581	-46.893	4.322	0.468	q1_ao_1_e3_3_43_0014_40_0003
-4718.16	8.271	-45.111	4.327	0.468	q1_ao_1_e3_3_43_0014_40_0014
-4711.22	8.631	-42.61	4.321	0.468	q1_ao_1_e3_3_43_0014_40_0015
-4719.02	8.259	-44.496	4.325	0.468	q1_ao_1_e3_3_43_0014_40_0017
-4721.75	8.473	-47.205	4.313	0.468	q1_ao_1_e3_3_43_0014_40_0020
-4707.57	9.3	-47.196	4.315	0.468	q1_ao_1_e3_3_43_0014_40_0021
-4721.73	8.514	-46.167	4.314	0.468	q1_ao_1_e3_3_43_0014_40_0026
-4721.42	8.624	-47.468	4.303	0.468	q1_ao_1_e3_3_43_0014_40_0028
-4718.2	8.047	-44.243	4.326	0.468	q1_ao_1_e3_3_43_0014_40_0030
-4705.54	8.477	-48.57	4.29	0.468	q1_ao_1_e3_3_43_0014_40_0032
-4719.4	8.441	-44.894	4.323	0.468	q1_ao_1_e3_3_43_0014_40_0033
-4704.1	8.297	-47.101	4.299	0.468	q1_ao_1_e3_3_43_0014_40_0037
-4703.62	8.844	-29.632	4.33	0.468	q1_ao_1_e3_3_59_0018_41_0014
-4724.75	8.689	-47.462	4.332	0.468	q1_ao_1_e3_3_61_0027_42_0001
-4707.67	8.398	-45.682	4.319	0.468	q1_ao_1_e3_3_61_0027_42_0016
-4714.31	8.405	-41.248	4.313	0.468	q1_ao_1_e3_3_61_0027_42_0017
-4720.16	8.656	-45.805	4.333	0.468	q1_ao_1_e3_3_61_0027_42_0018
-4710.27	8.45	-39.832	4.299	0.468	q1_ao_1_e3_3_61_0027_42_0022
-4720.32	8.537	-45.027	4.332	0.468	q1_ao_1_e3_3_61_0027_42_0025
-4718.31	8.582	-46.372	4.326	0.468	q1_ao_1_e3_3_61_0027_42_0030
-4711.73	6.582	-38.174	4.368	0.468	q1_ao_1_e3_3_61_0035_42_0020
-4717.28	9.631	-39.958	4.311	0.468	q1_ao_1_e3_3_6_0015_42_0002
-4717.71	9.493	-40.895	4.321	0.468	q1_ao_1_e3_3_6_0015_42_0003
-4715.86	9.498	-38.93	4.328	0.468	q1_ao_1_e3_3_6_0015_42_0008
-4715.8	9.659	-38.548	4.323	0.468	q1_ao_1_e3_3_6_0015_42_0019
-4712.65	10	-37.437	4.325	0.468	q1_ao_1_e3_3_6_0015_42_0028
-4695.15	9.337	-38.563	4.323	0.468	q1_ao_1_e3_3_6_0015_42_0031
-4712.52	9.271	-39.365	4.315	0.468	q1_ao_1_e3_3_6_0028_42_0031
-4715.14	8.279	-43.55	4.327	0.468	q1_ao_1_e3_3_6_0028_42_0032
-4713.45	8.509	-40.175	4.316	0.468	q1_ao_1_e3_3_64_0021_43_0023
-4723.08	8.796	-46.469	4.339	0.468	q1_ao_1_e3_3_65_0035_43_0006
-4723.84	8.812	-47.814	4.328	0.468	q1_ao_1_e3_3_65_0035_43_0007
-4700.94	8.575	-46.75	4.297	0.468	q1_ao_1_e3_3_65_0035_43_0013
-4720.97	8.997	-46.19	4.325	0.468	q1_ao_1_e3_3_65_0035_43_0023
-4710.24	9.122	-47.353	4.306	0.468	q1_ao_1_e3_3_65_0035_43_0030
-4720.86	8.737	-45.569	4.314	0.468	q1_ao_1_e3_3_65_0035_43_0031
-4718.2	8.612	-45.25	4.323	0.468	q1_ao_1_e3_3_70_0035_43_0003
-4721.75	8.598	-47.103	4.32	0.468	q1_ao_1_e3_3_70_0035_43_0013
-4696.69	9.297	-47.053	4.317	0.468	q1_ao_1_e3_3_70_0035_43_0020
-4719.55	8.436	-46.348	4.323	0.468	q1_ao_1_e3_3_70_0035_43_0028
-4721.94	8.698	-47.383	4.326	0.468	q1_ao_1_e3_3_70_0035_43_0034
-4707.17	8.603	-48.181	4.312	0.468	q1_ao_1_e3_3_7_0013_43_0005
-4720.58	8.349	-45.67	4.312	0.468	q1_ao_1_e3_3_7_0013_43_0030
-4718.63	8.901	-43.943	4.331	0.468	q1_ao_1_e3_3_7_0013_43_0036
-4713.37	7.466	-36.676	4.315	0.468	q1_ao_1_e3_3_75_0037_44_0007
-4713.54	8.709	-48.484	4.307	0.468	q1_ao_1_e3_3_75_0037_44_0017
-4706.43	8.501	-45.959	4.318	0.468	q1_ao_1_e3_3_75_0037_44_0018
-4708.56	8.774	-47.409	4.303	0.468	q1_ao_1_e3_3_75_0037_44_0028
-4718.56	8.744	-45.42	4.305	0.468	q1_ao_1_e3_3_77_0010_44_0007
-4721.06	8.951	-47.539	4.323	0.468	q1_ao_1_e3_3_77_0010_44_0016
-4719.89	8.42	-45.346	4.329	0.468	q1_ao_1_e3_3_77_0010_44_0022
-4720.12	8.879	-46.268	4.321	0.468	q1_ao_1_e3_3_77_0010_44_0027
-4715.81	9.883	-39.493	4.335	0.468	q1_ao_1_e3_3_80_0023_44_0016
-4713.18	8.751	-42.037	4.352	0.468	q1_ao_1_e3_3_80_0023_44_0017
-4711.88	8.753	-39.621	4.358	0.468	q1_ao_1_e3_3_80_0023_44_0022
-4723.36	8.412	-49.137	4.376	0.468	q1_ao_1_e3_3_82_0002_44_0011
-4721.73	8.762	-46.865	4.343	0.468	q1_ao_1_e3_3_82_0025_45_0040
-4710.64	9.042	-40.194	4.361	0.468	q1_ao_1_e3_3_82_0035_45_0021
-4724.28	8.758	-51.01	4.383	0.468	q1_ao_1_e3_3_84_0017_45_0018
-4724.55	8.622	-49.977	4.375	0.468	q1_ao_1_e3_3_84_0017_45_0022
-4723.55	8.644	-50.553	4.399	0.468	q1_ao_1_e3_3_84_0017_45_0032
-4717.29	9.062	-40.186	4.32	0.468	q1_ao_1_e3_3_89_0010_46_0014
-4721.03	8.588	-45.318	4.324	0.468	q1_ao_1_e3_3_91_0017_46_0031
-4719.06	8.579	-51.515	4.412	0.468	q1_ao_1_e3_3_93_0040_46_0006
-4719.08	8.525	-50.756	4.413	0.468	q1_ao_1_e3_3_93_0040_46_0008
-4723.24	8.453	-51.121	4.4	0.468	q1_ao_1_e3_3_93_0040_46_0010
-4703.22	8.492	-50.661	4.386	0.468	q1_ao_1_e3_3_93_0040_46_0012
-4716.81	8.39	-49.402	4.408	0.468	q1_ao_1_e3_3_93_0040_46_0028
-4718.44	8.548	-50.836	4.407	0.468	q1_ao_1_e3_3_93_0040_46_0038
-4707.56	8.79	-48.475	4.303	0.468	q1_ao_1_e3_3_94_0021_47_0008
-4721.27	8.687	-44.843	4.323	0.468	q1_ao_1_e3_3_94_0021_47_0035
-4719.48	8.834	-44.192	4.372	0.468	q1_ao_1_e3_3_96_0034_47_0030
-4713.3	8.452	-36.952	4.372	0.468	q1_ao_1_e3_4_14_0023_48_0006
-4716.21	6.772	-35.988	4.332	0.468	q1_ao_1_e3_4_14_0023_48_0025
-4712.81	7.528	-38.458	4.329	0.468	q1_ao_1_e3_4_14_0023_48_0034
-4719.16	6.25	-42.312	4.284	0.468	q1_ao_1_e3_4_14_0023_48_0037
-4712.9	7.522	-36.326	4.367	0.468	q1_ao_1_e3_4_17_0018_48_0019
-4714.73	7.934	-36.402	4.311	0.468	q1_ao_1_e3_4_17_0018_48_0022
-4705.74	9.742	-33.133	4.366	0.468	q1_ao_1_e3_4_19_0024_48_0040
-4710.19	7.14	-36.795	4.345	0.468	q1_ao_1_e3_4_21_0003_49_0009
-4709.22	7.562	-37.481	4.369	0.468	q1_ao_1_e3_4_21_0003_49_0018
-4715.13	4.329	-43.823	4.182	0.468	q1_ao_1_e3_4_23_0012_49_0037
-4710.12	7.829	-34.984	4.335	0.468	q1_ao_1_e3_4_28_0001_49_0019
-4710.84	8.527	-35.072	4.337	0.468	q1_ao_1_e3_4_28_0001_49_0021
-4722.35	4.168	-52.516	4.268	0.468	q1_ao_1_e3_10_34_0020_4_0016
-4722.92	7.055	-45.838	4.331	0.468	q1_ao_1_e3_10_34_0028_4_0003
-4727.52	7.083	-47.069	4.329	0.468	q1_ao_1_e3_10_34_0028_4_0013
-4722.22	6.738	-42.722	4.288	0.468	q1_ao_1_e3_10_35_0009_4_0013
-4720.27	6.529	-42.672	4.287	0.468	q1_ao_1_e3_10_35_0009_4_0014
-4702.27	6.588	-46.443	4.282	0.468	q1_ao_1_e3_10_35_0028_4_0021
-4710.51	8.791	-35.667	4.362	0.468	q1_ao_1_e3_4_36_0038_50_0038
-4708.3	7.35	-32.304	4.322	0.468	q1_ao_1_e3_4_38_0001_50_0008
-4708.05	7.461	-33.046	4.333	0.468	q1_ao_1_e3_4_38_0001_50_0018
-4709.69	7.267	-34.923	4.337	0.468	q1_ao_1_e3_4_38_0001_50_0019
-4711.97	7.166	-33.975	4.334	0.468	q1_ao_1_e3_4_38_0001_50_0020
-4709.96	7.671	-34.179	4.33	0.468	q1_ao_1_e3_4_38_0001_50_0024
-4711.24	7.172	-35.232	4.338	0.468	q1_ao_1_e3_4_38_0001_50_0025
-4709.35	7.344	-35.317	4.328	0.468	q1_ao_1_e3_4_38_0001_50_0026
-4711.82	7.185	-34.439	4.331	0.468	q1_ao_1_e3_4_38_0001_50_0027
-4709.79	7.389	-34.107	4.331	0.468	q1_ao_1_e3_4_38_0001_50_0028
-4711.04	7.253	-35.057	4.336	0.468	q1_ao_1_e3_4_38_0001_50_0033
-4708.89	7.234	-34.742	4.329	0.468	q1_ao_1_e3_4_38_0001_50_0034
-4710.61	7.351	-34.157	4.348	0.468	q1_ao_1_e3_4_38_0001_50_0036
-4708.69	7.637	-33.339	4.33	0.468	q1_ao_1_e3_4_38_0001_50_0037
-4710.4	7.039	-34.09	4.335	0.468	q1_ao_1_e3_4_38_0001_50_0039
-4711.67	7.849	-37.766	4.367	0.468	q1_ao_1_e3_4_43_0025_51_0009
-4713.64	3.991	-41.773	4.319	0.468	q1_ao_1_e3_4_43_0025_51_0011
-4696.84	8.266	-37.682	4.353	0.468	q1_ao_1_e3_4_43_0025_51_0014
-4695.33	8.267	-36.073	4.34	0.468	q1_ao_1_e3_4_43_0025_51_0032
-4710.8	7.937	-36.127	4.333	0.468	q1_ao_1_e3_4_43_0025_51_0038
-4691.72	10.141	-30.026	4.384	0.468	q1_ao_1_e3_4_59_0004_52_0006
-4713.82	7.52	-36.3	4.338	0.468	q1_ao_1_e3_4_59_0004_52_0021
-4717.31	6.945	-39.19	4.338	0.468	q1_ao_1_e3_4_59_0004_52_0037
-4710.94	4.781	-43.317	4.2	0.468	q1_ao_1_e3_4_62_0008_53_0034
-4708.64	7.466	-34.273	4.333	0.468	q1_ao_1_e3_4_72_0019_54_0021
-4715.36	8.177	-40.632	4.368	0.468	q1_ao_1_e3_4_75_0032_54_0009
-4717.36	8.272	-40.212	4.374	0.468	q1_ao_1_e3_4_75_0032_54_0038
-4708.58	8.307	-34.672	4.345	0.468	q1_ao_1_e3_4_78_0031_54_0013
-4714.01	8.576	-36.755	4.357	0.468	q1_ao_1_e3_4_78_0031_54_0023
-4712.38	8.658	-36.085	4.367	0.468	q1_ao_1_e3_4_78_0031_54_0027
-4718.21	8.12	-39.485	4.36	0.468	q1_ao_1_e3_4_78_0031_54_0034
-4707.98	5.38	-39.647	4.256	0.468	q1_ao_1_e3_4_83_0001_54_0015
-4714.96	8.348	-43.056	4.335	0.468	q1_ao_1_e3_4_90_0022_55_0002
-4716.24	8.302	-42.771	4.331	0.468	q1_ao_1_e3_4_90_0022_55_0003
-4718.5	8.187	-44.047	4.327	0.468	q1_ao_1_e3_4_90_0022_55_0005
-4695.56	7.608	-35.154	4.329	0.468	q1_ao_1_e3_4_90_0022_55_0007
-4687.63	8.095	-44.59	4.324	0.468	q1_ao_1_e3_4_90_0022_55_0008
-4718.1	8.547	-42.719	4.353	0.468	q1_ao_1_e3_4_90_0022_55_0029
-4716.9	8.525	-43.791	4.336	0.468	q1_ao_1_e3_4_90_0022_55_0031
-4718.92	8.448	-45.179	4.368	0.468	q1_ao_1_e3_4_90_0022_55_0034
-4715.95	8.373	-42.178	4.329	0.468	q1_ao_1_e3_4_90_0022_55_0035
-4717.67	8.302	-43.457	4.333	0.468	q1_ao_1_e3_4_90_0022_55_0037
-4699.62	8.73	-37.765	4.318	0.468	q1_ao_1_e3_4_91_0005_55_0040
-4714.82	8.363	-41.864	4.382	0.468	q1_ao_1_e3_4_92_0039_55_0001
-4714.94	8.249	-43.449	4.373	0.468	q1_ao_1_e3_4_92_0039_55_0009
-4715.06	8.222	-42.435	4.385	0.468	q1_ao_1_e3_4_92_0039_55_0025
-4715.32	9.321	-42.439	4.33	0.468	q1_ao_1_e3_5_13_0004_57_0035
-4715.75	8.933	-44.966	4.34	0.468	q1_ao_1_e3_5_23_0026_58_0005
-4717.36	8.502	-44.398	4.319	0.468	q1_ao_1_e3_5_23_0026_58_0007
-4721.96	8.667	-45.395	4.341	0.468	q1_ao_1_e3_5_23_0026_58_0008
-4718.72	8.151	-45.027	4.318	0.468	q1_ao_1_e3_5_23_0026_58_0011
-4715.81	8.466	-44.976	4.327	0.468	q1_ao_1_e3_5_23_0026_58_0012
-4714.07	8.721	-43.877	4.335	0.468	q1_ao_1_e3_5_23_0026_58_0018
-4705.2	8.587	-44.837	4.327	0.468	q1_ao_1_e3_5_23_0026_58_0023
-4717.91	8.677	-45.619	4.338	0.468	q1_ao_1_e3_5_23_0026_58_0025
-4716.71	8.43	-45.67	4.327	0.468	q1_ao_1_e3_5_23_0026_58_0028
-4692.78	8.552	-44.161	4.32	0.468	q1_ao_1_e3_5_23_0026_58_0036
-4715.42	8.693	-43.945	4.335	0.468	q1_ao_1_e3_5_23_0026_58_0037
-4705.8	8.668	-47.441	4.33	0.468	q1_ao_1_e3_5_23_0026_58_0038
-4723.84	8.73	-46.639	4.323	0.468	q1_ao_1_e3_5_23_0026_58_0040
-4701.42	8.536	-44.23	4.293	0.468	q1_ao_1_e3_5_23_0028_58_0004
-4718.96	8.764	-44.926	4.318	0.468	q1_ao_1_e3_5_23_0028_58_0009
-4723.5	8.647	-47.111	4.328	0.468	q1_ao_1_e3_5_23_0028_58_0011
-4718.21	8.473	-43.617	4.305	0.468	q1_ao_1_e3_5_23_0028_58_0017
-4715.71	9.207	-45.984	4.333	0.468	q1_ao_1_e3_5_23_0028_58_0022
-4717.44	8.683	-43.892	4.314	0.468	q1_ao_1_e3_5_23_0028_58_0025
-4703.25	8.651	-45.683	4.305	0.468	q1_ao_1_e3_5_23_0028_58_0027
-4719.91	9.281	-50.05	4.346	0.468	q1_ao_1_e3_5_23_0028_58_0034
-4716.74	8.8	-43.76	4.311	0.468	q1_ao_1_e3_5_23_0028_58_0036
-4722.59	8.68	-46.933	4.31	0.468	q1_ao_1_e3_5_25_0013_58_0001
-4702.17	8.685	-47.287	4.316	0.468	q1_ao_1_e3_5_25_0013_58_0003
-4721.63	8.586	-46.1	4.313	0.468	q1_ao_1_e3_5_25_0013_58_0017
-4719.91	8.562	-46.229	4.32	0.468	q1_ao_1_e3_5_25_0013_58_0034
-4721.46	8.581	-46.184	4.319	0.468	q1_ao_1_e3_5_25_0013_58_0035
-4694.8	9.075	-42.813	4.347	0.468	q1_ao_1_e3_5_26_0018_58_0019
-4708.17	9.83	-33.02	4.326	0.468	q1_ao_1_e3_5_30_0020_59_0035
-4712.89	9.075	-40.389	4.329	0.468	q1_ao_1_e3_5_32_0032_59_0005
-4711.81	8.625	-40.231	4.324	0.468	q1_ao_1_e3_5_32_0032_59_0007
-4713.71	8.722	-41.813	4.335	0.468	q1_ao_1_e3_5_32_0032_59_0008
-4703.05	8.774	-41.391	4.331	0.468	q1_ao_1_e3_5_32_0032_59_0022
-4714.28	8.434	-41.588	4.32	0.468	q1_ao_1_e3_5_32_0032_59_0029
-4687.57	8.78	-42.212	4.322	0.468	q1_ao_1_e3_5_32_0032_59_0030
-4713.56	8.601	-40.666	4.33	0.468	q1_ao_1_e3_5_32_0032_59_0032
-4703.55	6.678	-47.132	4.288	0.468	q1_ao_1_e3_10_42_0035_5_0005
-4717.11	7.553	-40.077	4.274	0.468	q1_ao_1_e3_10_42_0036_5_0003
-4724.61	7.205	-47.165	4.302	0.468	q1_ao_1_e3_10_43_0032_5_0027
-4707.14	6.384	-45.108	4.308	0.468	q1_ao_1_e3_10_43_0040_5_0013
-4715.16	6.58	-47.172	4.325	0.468	q1_ao_1_e3_10_43_0040_5_0027
-4701.14	7.647	-49.089	4.308	0.468	q1_ao_1_e3_10_4_0026_5_0010
-4723.92	7.65	-50.853	4.299	0.468	q1_ao_1_e3_10_4_0026_5_0028
-4727.35	7.551	-51.524	4.279	0.468	q1_ao_1_e3_10_4_0026_5_0033
-4711.94	8.618	-36.601	4.376	0.468	q1_ao_1_e3_5_37_0029_60_0015
-4705.2	9.441	-32.799	4.385	0.468	q1_ao_1_e3_5_37_0029_60_0028
-4706.76	9.97	-35.729	4.383	0.468	q1_ao_1_e3_5_37_0029_60_0035
-4721.34	8.573	-45.203	4.327	0.468	q1_ao_1_e3_5_49_0010_60_0008
-4724.8	8.508	-47.772	4.315	0.468	q1_ao_1_e3_5_49_0010_60_0010
-4721.41	8.664	-45.369	4.328	0.468	q1_ao_1_e3_5_49_0010_60_0013
-4723.07	8.914	-46.069	4.342	0.468	q1_ao_1_e3_5_55_0018_61_0002
-4711.99	8.483	-39.995	4.316	0.468	q1_ao_1_e3_5_55_0018_61_0003
-4712.85	9.084	-35.304	4.344	0.468	q1_ao_1_e3_5_57_0012_61_0010
-4713.87	8.954	-42.002	4.341	0.468	q1_ao_1_e3_5_57_0037_61_0018
-4708.31	8.813	-42.006	4.336	0.468	q1_ao_1_e3_5_57_0037_61_0019
-4715.67	8.571	-43.273	4.342	0.468	q1_ao_1_e3_5_57_0037_61_0020
-4696.64	8.758	-41.251	4.325	0.468	q1_ao_1_e3_5_57_0037_61_0030
-4690.02	9.121	-41.57	4.341	0.468	q1_ao_1_e3_5_59_0039_62_0020
-4713.13	8.619	-42.69	4.322	0.468	q1_ao_1_e3_5_59_0039_62_0028
-4721.24	8.638	-46.68	4.337	0.468	q1_ao_1_e3_5_60_0019_62_0039
-4714.43	7.622	-33.456	4.349	0.468	q1_ao_1_e3_5_64_0002_62_0014
-4720.4	8.436	-45.588	4.311	0.468	q1_ao_1_e3_5_70_0023_63_0002
-4721.31	8.39	-45.728	4.319	0.468	q1_ao_1_e3_5_70_0023_63_0014
-4701.66	8.153	-46.765	4.302	0.468	q1_ao_1_e3_5_70_0023_63_0016
-4691.56	8.266	-35.636	4.265	0.468	q1_ao_1_e3_5_70_0023_63_0027
-4724.71	8.405	-45.946	4.311	0.468	q1_ao_1_e3_5_70_0023_63_0030
-4697.68	8.358	-44.779	4.296	0.468	q1_ao_1_e3_5_70_0023_63_0039
-4717.44	8.714	-44.018	4.322	0.468	q1_ao_1_e3_5_70_0023_63_0040
-4713.79	8.312	-32.459	4.33	0.468	q1_ao_1_e3_5_77_0025_64_0013
-4715.54	5.841	-38.586	4.295	0.468	q1_ao_1_e3_5_78_0031_64_0026
-4707.36	7.913	-30.789	4.311	0.468	q1_ao_1_e3_5_78_0031_64_0037
-4724.27	8.63	-47.093	4.314	0.468	q1_ao_1_e3_5_81_0008_64_0002
-4710.74	8.56	-46.727	4.317	0.468	q1_ao_1_e3_5_81_0008_64_0010
-4710.47	8.562	-46.413	4.316	0.468	q1_ao_1_e3_5_81_0008_64_0018
-4708.48	8.657	-43.844	4.319	0.468	q1_ao_1_e3_5_81_0008_64_0037
-4710.69	8.624	-45.128	4.32	0.468	q1_ao_1_e3_5_81_0008_64_0040
-4726.11	8.476	-50.792	4.383	0.468	q1_ao_1_e3_5_83_0005_64_0007
-4722.15	8.718	-45.667	4.325	0.468	q1_ao_1_e3_5_94_0026_65_0015
-4713.18	7.806	-35.765	4.312	0.468	q1_ao_1_e3_5_94_0026_65_0020
[truncated: 156,451 more rows]
