# Supplementary material for: Allosteric mechanism for KCNE1 modulation of KCNQ1 potassium channel activation
Source: eLife. 2020 Oct 23;9:e57680. doi: 10.7554/eLife.57680 (PMC7584456; doi:10.7554/eLife.57680)
Supplement: Figure 5—figure supplement 1—source data 1. [file elife-57680-fig5-figsupp1-data1.xlsx]

## Sheet: Panel C - MD RMSD to t=0
KCNQ1-KCNE1 Resting/Closed Model					KCNQ1-KCNE1 Activated/Open Model
Time (ns)	KCNQ1 RMSD (Ang.)	KCNE1 RMSD (Ang.)			Time (ns)	KCNQ1 RMSD (Ang.)	KCNE1 RMSD (Ang.)
0	0	0			0	0	0
0.015	0.309	0.352			0.015	0.246	0.227
0.03	0.313	0.304			0.03	0.255	0.27
0.045	0.314	0.299			0.045	0.253	0.273
0.06	0.31	0.292			0.06	0.256	0.265
0.075	0.31	0.289			0.075	0.252	0.232
0.09	0.311	0.311			0.09	0.26	0.286
0.105	0.316	0.291			0.105	0.253	0.259
0.12	0.323	0.303			0.12	0.254	0.264
0.135	0.323	0.275			0.135	0.256	0.218
0.15	0.315	0.328			0.15	0.254	0.246
0.165	0.326	0.322			0.165	0.255	0.26
0.18	0.307	0.306			0.18	0.259	0.222
0.195	0.33	0.317			0.195	0.248	0.268
0.21	0.319	0.302			0.21	0.248	0.261
0.225	0.312	0.306			0.225	0.257	0.264
0.24	0.317	0.311			0.24	0.258	0.255
0.255	0.323	0.312			0.255	0.258	0.247
0.27	0.321	0.293			0.27	0.257	0.252
0.285	0.319	0.32			0.285	0.252	0.26
0.3	0.321	0.319			0.3	0.256	0.273
0.315	0.322	0.312			0.315	0.255	0.278
0.33	0.333	0.333			0.33	0.249	0.247
0.345	0.331	0.338			0.345	0.249	0.262
0.36	0.329	0.342			0.36	0.255	0.253
0.375	0.33	0.321			0.375	0.254	0.241
0.39	0.326	0.383			0.39	0.257	0.236
0.405	0.336	0.35			0.405	0.256	0.261
0.42	0.339	0.328			0.42	0.255	0.248
0.435	0.339	0.326			0.435	0.256	0.274
0.45	0.363	0.322			0.45	0.25	0.238
0.465	0.356	0.335			0.465	0.25	0.241
0.48	0.369	0.332			0.48	0.251	0.276
0.495	0.364	0.358			0.495	0.251	0.279
0.51	0.343	0.334			0.51	0.254	0.246
0.525	0.345	0.35			0.525	0.261	0.246
0.54	0.352	0.325			0.54	0.253	0.274
0.555	0.347	0.337			0.555	0.253	0.273
0.57	0.356	0.351			0.57	0.257	0.257
0.585	0.37	0.338			0.585	0.25	0.282
0.6	0.365	0.332			0.6	0.259	0.252
0.615	0.358	0.326			0.615	0.258	0.246
0.63	0.364	0.346			0.63	0.255	0.262
0.645	0.363	0.34			0.645	0.245	0.268
0.66	0.345	0.34			0.66	0.25	0.238
0.675	0.353	0.335			0.675	0.256	0.243
0.69	0.349	0.326			0.69	0.256	0.261
0.705	0.344	0.312			0.705	0.252	0.264
0.72	0.337	0.331			0.72	0.252	0.258
0.735	0.364	0.306			0.735	0.254	0.255
0.75	0.36	0.321			0.75	0.254	0.263
0.765	0.365	0.302			0.765	0.257	0.266
0.78	0.359	0.323			0.78	0.261	0.236
0.795	0.355	0.297			0.795	0.258	0.275
0.81	0.351	0.324			0.81	0.258	0.272
0.825	0.357	0.301			0.825	0.252	0.234
0.84	0.346	0.328			0.84	0.263	0.259
0.855	0.346	0.306			0.855	0.256	0.285
0.87	0.35	0.332			0.87	0.264	0.256
0.885	0.348	0.316			0.885	0.251	0.273
0.9	0.345	0.306			0.9	0.252	0.229
0.915	0.347	0.283			0.915	0.262	0.258
0.93	0.338	0.331			0.93	0.259	0.234
0.945	0.333	0.313			0.945	0.257	0.253
0.96	0.33	0.339			0.96	0.254	0.241
0.975	0.344	0.321			0.975	0.254	0.233
0.99	0.35	0.307			0.99	0.248	0.239
1.005	0.339	0.315			1.005	0.252	0.249
1.02	0.338	0.346			1.02	0.249	0.247
1.035	0.338	0.323			1.035	0.253	0.259
1.05	0.347	0.329			1.05	0.263	0.255
1.065	0.345	0.346			1.065	0.258	0.262
1.08	0.34	0.331			1.08	0.257	0.245
1.095	0.352	0.342			1.095	0.252	0.264
1.11	0.358	0.321			1.11	0.253	0.252
1.125	0.37	0.31			1.125	0.256	0.247
1.14	0.355	0.362			1.14	0.255	0.262
1.155	0.339	0.308			1.155	0.262	0.264
1.17	0.351	0.337			1.17	0.263	0.246
1.185	0.356	0.328			1.185	0.258	0.243
1.2	0.352	0.339			1.2	0.254	0.231
1.215	0.362	0.307			1.215	0.255	0.251
1.23	0.36	0.329			1.23	0.256	0.251
1.245	0.357	0.32			1.245	0.258	0.26
1.26	0.354	0.337			1.26	0.258	0.249
1.275	0.366	0.313			1.275	0.259	0.25
1.29	0.383	0.354			1.29	0.254	0.219
1.305	0.357	0.331			1.305	0.257	0.261
1.32	0.374	0.333			1.32	0.254	0.233
1.335	0.371	0.304			1.335	0.256	0.232
1.35	0.365	0.34			1.35	0.256	0.277
1.365	0.361	0.37			1.365	0.257	0.266
1.38	0.372	0.327			1.38	0.252	0.264
1.395	0.392	0.338			1.395	0.256	0.242
1.41	0.363	0.303			1.41	0.266	0.245
1.425	0.356	0.297			1.425	0.254	0.254
1.44	0.36	0.33			1.44	0.254	0.256
1.455	0.366	0.327			1.455	0.258	0.253
1.47	0.353	0.331			1.47	0.255	0.263
1.485	0.353	0.304			1.485	0.258	0.263
1.5	0.351	0.306			1.5	0.262	0.243
1.515	0.349	0.307			1.515	0.254	0.247
1.53	0.358	0.362			1.53	0.26	0.26
1.545	0.355	0.303			1.545	0.254	0.273
1.56	0.359	0.36			1.56	0.258	0.266
1.575	0.354	0.314			1.575	0.257	0.283
1.59	0.354	0.346			1.59	0.255	0.258
1.605	0.358	0.33			1.605	0.254	0.262
1.62	0.367	0.376			1.62	0.245	0.285
1.635	0.364	0.297			1.635	0.26	0.283
1.65	0.358	0.323			1.65	0.258	0.234
1.665	0.428	0.364			1.665	0.318	0.331
1.68	0.425	0.374			1.68	0.313	0.319
1.695	0.408	0.378			1.695	0.318	0.321
1.71	0.417	0.384			1.71	0.322	0.308
1.725	0.417	0.344			1.725	0.321	0.326
1.74	0.431	0.343			1.74	0.323	0.31
1.755	0.427	0.375			1.755	0.317	0.325
1.77	0.433	0.362			1.77	0.321	0.304
1.785	0.449	0.359			1.785	0.33	0.324
1.8	0.448	0.324			1.8	0.326	0.316
1.815	0.447	0.334			1.815	0.317	0.347
1.83	0.443	0.382			1.83	0.325	0.331
1.845	0.433	0.399			1.845	0.32	0.328
1.86	0.43	0.377			1.86	0.316	0.329
1.875	0.45	0.441			1.875	0.324	0.33
1.89	0.443	0.403			1.89	0.323	0.3
1.905	0.441	0.433			1.905	0.325	0.326
1.92	0.461	0.41			1.92	0.321	0.316
1.935	0.436	0.382			1.935	0.317	0.35
1.95	0.445	0.404			1.95	0.308	0.304
1.965	0.438	0.38			1.965	0.328	0.319
1.98	0.457	0.414			1.98	0.319	0.304
1.995	0.461	0.456			1.995	0.317	0.294
2.01	0.451	0.357			2.01	0.328	0.32
2.025	0.449	0.34			2.025	0.32	0.322
2.04	0.45	0.365			2.04	0.327	0.312
2.055	0.449	0.386			2.055	0.321	0.29
2.07	0.432	0.381			2.07	0.324	0.358
2.085	0.441	0.397			2.085	0.322	0.326
2.1	0.463	0.426			2.1	0.312	0.321
2.115	0.449	0.424			2.115	0.327	0.318
2.13	0.45	0.39			2.13	0.315	0.281
2.145	0.442	0.344			2.145	0.319	0.319
2.16	0.419	0.404			2.16	0.325	0.277
2.175	0.427	0.402			2.175	0.318	0.338
2.19	0.418	0.388			2.19	0.327	0.303
2.205	0.428	0.425			2.205	0.315	0.326
2.22	0.436	0.386			2.22	0.316	0.321
2.235	0.438	0.456			2.235	0.328	0.323
2.25	0.436	0.43			2.25	0.317	0.34
2.265	0.43	0.365			2.265	0.316	0.356
2.28	0.422	0.388			2.28	0.315	0.311
2.295	0.413	0.39			2.295	0.322	0.319
2.31	0.423	0.417			2.31	0.322	0.306
2.325	0.436	0.398			2.325	0.323	0.32
2.34	0.44	0.387			2.34	0.325	0.318
2.355	0.428	0.387			2.355	0.312	0.281
2.37	0.424	0.413			2.37	0.311	0.319
2.385	0.443	0.42			2.385	0.314	0.329
2.4	0.443	0.409			2.4	0.315	0.329
2.415	0.431	0.407			2.415	0.32	0.304
2.43	0.435	0.423			2.43	0.32	0.343
2.445	0.45	0.406			2.445	0.319	0.351
2.46	0.44	0.391			2.46	0.31	0.349
2.475	0.452	0.386			2.475	0.32	0.301
2.49	0.442	0.386			2.49	0.324	0.286
2.505	0.437	0.377			2.505	0.322	0.345
2.52	0.449	0.39			2.52	0.319	0.286
2.535	0.447	0.426			2.535	0.316	0.27
2.55	0.446	0.383			2.55	0.33	0.279
2.565	0.434	0.382			2.565	0.318	0.308
2.58	0.44	0.383			2.58	0.322	0.329
2.595	0.447	0.372			2.595	0.315	0.314
2.61	0.459	0.385			2.61	0.319	0.323
2.625	0.463	0.382			2.625	0.315	0.336
2.64	0.44	0.359			2.64	0.322	0.294
2.655	0.443	0.397			2.655	0.321	0.324
2.67	0.437	0.357			2.67	0.324	0.287
2.685	0.45	0.379			2.685	0.319	0.328
2.7	0.437	0.373			2.7	0.313	0.287
2.715	0.427	0.388			2.715	0.317	0.304
2.73	0.449	0.387			2.73	0.322	0.342
2.745	0.449	0.403			2.745	0.321	0.291
2.76	0.443	0.366			2.76	0.326	0.291
2.775	0.439	0.413			2.775	0.33	0.312
2.79	0.443	0.404			2.79	0.324	0.326
2.805	0.438	0.367			2.805	0.322	0.315
2.82	0.436	0.392			2.82	0.326	0.295
2.835	0.427	0.411			2.835	0.333	0.32
2.85	0.436	0.383			2.85	0.336	0.315
2.865	0.438	0.364			2.865	0.333	0.303
2.88	0.44	0.386			2.88	0.314	0.278
2.895	0.457	0.382			2.895	0.309	0.305
2.91	0.448	0.355			2.91	0.322	0.314
2.925	0.458	0.394			2.925	0.326	0.299
2.94	0.444	0.359			2.94	0.326	0.315
2.955	0.432	0.381			2.955	0.324	0.292
2.97	0.438	0.426			2.97	0.325	0.303
2.985	0.425	0.403			2.985	0.315	0.317
3	0.459	0.398			3	0.326	0.303
3.015	0.453	0.411			3.015	0.307	0.322
3.03	0.445	0.398			3.03	0.319	0.335
3.045	0.45	0.453			3.045	0.335	0.321
3.06	0.432	0.416			3.06	0.313	0.326
3.075	0.425	0.393			3.075	0.316	0.302
3.09	0.41	0.426			3.09	0.31	0.305
3.105	0.428	0.419			3.105	0.327	0.324
3.12	0.413	0.397			3.12	0.332	0.319
3.135	0.433	0.425			3.135	0.32	0.307
3.15	0.431	0.435			3.15	0.314	0.327
3.165	0.432	0.412			3.165	0.321	0.3
3.18	0.426	0.389			3.18	0.316	0.287
3.195	0.423	0.403			3.195	0.322	0.322
3.21	0.421	0.443			3.21	0.317	0.328
3.225	0.437	0.401			3.225	0.32	0.322
3.24	0.437	0.387			3.24	0.313	0.328
3.255	0.416	0.425			3.255	0.321	0.307
3.27	0.424	0.392			3.27	0.321	0.331
3.285	0.428	0.421			3.285	0.314	0.326
3.3	0.433	0.406			3.3	0.312	0.301
3.315	0.433	0.386			3.315	0.331	0.302
3.33	0.495	0.493			3.33	0.387	0.397
3.345	0.511	0.508			3.345	0.399	0.38
3.36	0.517	0.527			3.36	0.382	0.364
3.375	0.534	0.527			3.375	0.388	0.385
3.39	0.525	0.511			3.39	0.402	0.375
3.405	0.503	0.526			3.405	0.392	0.313
3.42	0.513	0.544			3.42	0.396	0.36
3.435	0.529	0.52			3.435	0.383	0.339
3.45	0.494	0.557			3.45	0.412	0.365
3.465	0.519	0.54			3.465	0.406	0.351
3.48	0.509	0.493			3.48	0.396	0.387
3.495	0.511	0.589			3.495	0.399	0.379
3.51	0.508	0.468			3.51	0.395	0.394
3.525	0.52	0.501			3.525	0.404	0.389
3.54	0.532	0.518			3.54	0.398	0.401
3.555	0.523	0.439			3.555	0.4	0.37
3.57	0.542	0.487			3.57	0.394	0.397
3.585	0.546	0.507			3.585	0.395	0.355
3.6	0.526	0.446			3.6	0.396	0.368
3.615	0.541	0.498			3.615	0.385	0.39
3.63	0.518	0.512			3.63	0.398	0.378
3.645	0.535	0.507			3.645	0.392	0.378
3.66	0.534	0.488			3.66	0.401	0.367
3.675	0.554	0.506			3.675	0.384	0.365
3.69	0.533	0.449			3.69	0.391	0.396
3.705	0.544	0.556			3.705	0.394	0.38
3.72	0.525	0.488			3.72	0.403	0.389
3.735	0.537	0.5			3.735	0.397	0.364
3.75	0.549	0.484			3.75	0.394	0.428
3.765	0.515	0.442			3.765	0.398	0.391
3.78	0.526	0.542			3.78	0.394	0.379
3.795	0.537	0.475			3.795	0.395	0.372
3.81	0.523	0.528			3.81	0.403	0.371
3.825	0.538	0.559			3.825	0.396	0.385
3.84	0.545	0.53			3.84	0.402	0.359
3.855	0.552	0.498			3.855	0.389	0.389
3.87	0.537	0.558			3.87	0.404	0.396
3.885	0.539	0.56			3.885	0.405	0.379
3.9	0.561	0.573			3.9	0.408	0.333
3.915	0.552	0.469			3.915	0.389	0.409
3.93	0.549	0.514			3.93	0.4	0.377
3.945	0.561	0.507			3.945	0.396	0.376
3.96	0.544	0.517			3.96	0.402	0.43
3.975	0.523	0.563			3.975	0.412	0.357
3.99	0.556	0.54			3.99	0.396	0.363
4.005	0.524	0.521			4.005	0.401	0.406
4.02	0.547	0.495			4.02	0.401	0.353
4.035	0.552	0.608			4.035	0.396	0.35
4.05	0.554	0.577			4.05	0.394	0.406
4.065	0.549	0.511			4.065	0.4	0.404
4.08	0.527	0.598			4.08	0.41	0.35
4.095	0.533	0.5			4.095	0.405	0.353
4.11	0.522	0.559			4.11	0.405	0.354
4.125	0.532	0.498			4.125	0.395	0.334
4.14	0.536	0.522			4.14	0.404	0.388
4.155	0.524	0.581			4.155	0.414	0.37
4.17	0.541	0.552			4.17	0.404	0.363
4.185	0.536	0.543			4.185	0.412	0.387
4.2	0.537	0.546			4.2	0.402	0.345
4.215	0.53	0.483			4.215	0.399	0.371
4.23	0.544	0.53			4.23	0.394	0.383
4.245	0.546	0.518			4.245	0.403	0.402
4.26	0.538	0.533			4.26	0.406	0.337
4.275	0.541	0.52			4.275	0.409	0.331
4.29	0.531	0.511			4.29	0.391	0.407
4.305	0.543	0.519			4.305	0.4	0.404
4.32	0.566	0.545			4.32	0.39	0.363
4.335	0.528	0.5			4.335	0.394	0.387
4.35	0.53	0.497			4.35	0.401	0.397
4.365	0.515	0.576			4.365	0.397	0.406
4.38	0.53	0.438			4.38	0.399	0.368
4.395	0.531	0.551			4.395	0.397	0.332
4.41	0.546	0.523			4.41	0.402	0.361
4.425	0.567	0.518			4.425	0.395	0.371
4.44	0.563	0.481			4.44	0.398	0.384
4.455	0.543	0.527			4.455	0.394	0.336
4.47	0.564	0.497			4.47	0.409	0.362
4.485	0.546	0.518			4.485	0.407	0.394
4.5	0.564	0.491			4.5	0.423	0.401
4.515	0.548	0.482			4.515	0.408	0.39
4.53	0.58	0.487			4.53	0.401	0.359
4.545	0.553	0.481			4.545	0.398	0.38
4.56	0.55	0.516			4.56	0.39	0.333
4.575	0.558	0.481			4.575	0.394	0.373
4.59	0.549	0.494			4.59	0.39	0.39
4.605	0.54	0.481			4.605	0.4	0.37
4.62	0.536	0.454			4.62	0.406	0.417
4.635	0.54	0.445			4.635	0.395	0.405
4.65	0.559	0.493			4.65	0.404	0.373
4.665	0.555	0.491			4.665	0.394	0.356
4.68	0.556	0.491			4.68	0.384	0.375
4.695	0.553	0.569			4.695	0.411	0.358
4.71	0.543	0.513			4.71	0.401	0.396
4.725	0.533	0.519			4.725	0.402	0.384
4.74	0.536	0.501			4.74	0.392	0.348
4.755	0.553	0.508			4.755	0.398	0.375
4.77	0.546	0.475			4.77	0.406	0.381
4.785	0.549	0.491			4.785	0.411	0.317
4.8	0.545	0.474			4.8	0.409	0.352
4.815	0.549	0.451			4.815	0.411	0.361
4.83	0.54	0.501			4.83	0.4	0.364
4.845	0.549	0.461			4.845	0.407	0.362
4.86	0.537	0.509			4.86	0.397	0.391
4.875	0.537	0.468			4.875	0.393	0.367
4.89	0.54	0.497			4.89	0.407	0.387
4.905	0.557	0.556			4.905	0.399	0.395
4.92	0.556	0.542			4.92	0.407	0.335
4.935	0.55	0.524			4.935	0.394	0.374
4.95	0.539	0.531			4.95	0.397	0.401
4.965	0.531	0.442			4.965	0.408	0.384
4.98	0.552	0.529			4.98	0.402	0.392
4.995	0.599	0.658			4.995	0.501	0.441
5.01	0.643	0.705			5.01	0.498	0.421
5.025	0.606	0.672			5.025	0.519	0.5
5.04	0.645	0.722			5.04	0.509	0.411
5.055	0.607	0.706			5.055	0.513	0.447
5.07	0.646	0.544			5.07	0.507	0.457
5.085	0.653	0.712			5.085	0.51	0.442
5.1	0.664	0.707			5.1	0.525	0.384
5.115	0.665	0.713			5.115	0.507	0.397
5.13	0.65	0.717			5.13	0.519	0.449
5.145	0.645	0.752			5.145	0.515	0.425
5.16	0.663	0.672			5.16	0.539	0.478
5.175	0.665	0.648			5.175	0.518	0.456
5.19	0.647	0.66			5.19	0.506	0.438
5.205	0.654	0.702			5.205	0.537	0.397
5.22	0.66	0.699			5.22	0.507	0.503
5.235	0.644	0.687			5.235	0.531	0.474
5.25	0.627	0.758			5.25	0.527	0.448
5.265	0.641	0.699			5.265	0.515	0.475
5.28	0.653	0.728			5.28	0.511	0.45
5.295	0.643	0.678			5.295	0.522	0.459
5.31	0.668	0.701			5.31	0.536	0.444
5.325	0.659	0.652			5.325	0.53	0.441
5.34	0.664	0.738			5.34	0.536	0.432
5.355	0.647	0.643			5.355	0.525	0.42
5.37	0.647	0.701			5.37	0.528	0.455
5.385	0.643	0.671			5.385	0.53	0.432
5.4	0.663	0.693			5.4	0.52	0.417
5.415	0.654	0.671			5.415	0.524	0.458
5.43	0.632	0.669			5.43	0.525	0.481
5.445	0.648	0.631			5.445	0.511	0.5
5.46	0.634	0.634			5.46	0.51	0.445
5.475	0.695	0.644			5.475	0.513	0.426
5.49	0.68	0.616			5.49	0.506	0.479
5.505	0.679	0.556			5.505	0.519	0.499
5.52	0.647	0.662			5.52	0.521	0.448
5.535	0.66	0.672			5.535	0.504	0.403
5.55	0.643	0.671			5.55	0.521	0.414
5.565	0.651	0.703			5.565	0.541	0.405
5.58	0.653	0.586			5.58	0.535	0.502
5.595	0.659	0.701			5.595	0.53	0.472
5.61	0.667	0.836			5.61	0.537	0.527
5.625	0.676	0.737			5.625	0.521	0.444
5.64	0.678	0.75			5.64	0.537	0.476
5.655	0.654	0.731			5.655	0.532	0.427
5.67	0.656	0.576			5.67	0.531	0.403
5.685	0.668	0.671			5.685	0.532	0.462
5.7	0.689	0.623			5.7	0.536	0.515
5.715	0.652	0.799			5.715	0.512	0.453
5.73	0.628	0.665			5.73	0.517	0.405
5.745	0.661	0.761			5.745	0.52	0.459
5.76	0.68	0.66			5.76	0.507	0.422
5.775	0.658	0.742			5.775	0.519	0.497
5.79	0.669	0.651			5.79	0.519	0.456
5.805	0.652	0.747			5.805	0.503	0.511
5.82	0.677	0.616			5.82	0.531	0.515
5.835	0.652	0.681			5.835	0.528	0.552
5.85	0.648	0.698			5.85	0.525	0.557
5.865	0.66	0.774			5.865	0.509	0.485
5.88	0.67	0.661			5.88	0.536	0.474
5.895	0.692	0.686			5.895	0.536	0.497
5.91	0.666	0.808			5.91	0.542	0.516
5.925	0.664	0.607			5.925	0.523	0.484
5.94	0.669	0.678			5.94	0.528	0.556
5.955	0.648	0.652			5.955	0.534	0.498
5.97	0.686	0.676			5.97	0.54	0.507
5.985	0.681	0.742			5.985	0.546	0.51
6	0.67	0.773			6	0.536	0.449
6.015	0.702	0.746			6.015	0.521	0.479
6.03	0.712	0.77			6.03	0.537	0.497
6.045	0.687	0.765			6.045	0.532	0.506
6.06	0.681	0.755			6.06	0.552	0.464
6.075	0.667	0.717			6.075	0.544	0.51
6.09	0.681	0.803			6.09	0.53	0.538
6.105	0.667	0.693			6.105	0.534	0.478
6.12	0.669	0.616			6.12	0.557	0.528
6.135	0.667	0.726			6.135	0.549	0.6
6.15	0.668	0.785			6.15	0.551	0.553
6.165	0.691	0.686			6.165	0.562	0.479
6.18	0.665	0.743			6.18	0.551	0.497
6.195	0.644	0.718			6.195	0.535	0.535
6.21	0.687	0.747			6.21	0.534	0.459
6.225	0.679	0.739			6.225	0.543	0.473
6.24	0.683	0.768			6.24	0.514	0.498
6.255	0.688	0.758			6.255	0.541	0.501
6.27	0.665	0.81			6.27	0.542	0.49
6.285	0.68	0.676			6.285	0.527	0.471
6.3	0.669	0.781			6.3	0.528	0.481
6.315	0.673	0.823			6.315	0.53	0.539
6.33	0.681	0.779			6.33	0.528	0.507
6.345	0.676	0.793			6.345	0.529	0.604
6.36	0.689	0.722			6.36	0.54	0.522
6.375	0.673	0.695			6.375	0.532	0.548
6.39	0.681	0.791			6.39	0.544	0.579
6.405	0.673	0.751			6.405	0.546	0.495
6.42	0.661	0.73			6.42	0.534	0.521
6.435	0.676	0.774			6.435	0.531	0.53
6.45	0.683	0.756			6.45	0.545	0.495
6.465	0.691	0.691			6.465	0.542	0.533
6.48	0.698	0.706			6.48	0.545	0.462
6.495	0.657	0.696			6.495	0.538	0.513
6.51	0.667	0.72			6.51	0.541	0.52
6.525	0.665	0.689			6.525	0.547	0.523
6.54	0.649	0.726			6.54	0.546	0.498
6.555	0.692	0.805			6.555	0.56	0.453
6.57	0.687	0.662			6.57	0.53	0.439
6.585	0.67	0.771			6.585	0.538	0.454
6.6	0.668	0.739			6.6	0.558	0.412
6.615	0.666	0.771			6.615	0.527	0.468
6.63	0.683	0.706			6.63	0.523	0.457
6.645	0.677	0.695			6.645	0.54	0.4
6.66	0.77	0.941			6.66	0.648	0.536
6.675	0.816	0.781			6.675	0.684	0.598
6.69	0.802	0.794			6.69	0.645	0.559
6.705	0.779	0.979			6.705	0.673	0.486
6.72	0.781	0.75			6.72	0.7	0.509
6.735	0.783	0.9			6.735	0.676	0.46
6.75	0.801	0.86			6.75	0.671	0.541
6.765	0.803	0.882			6.765	0.698	0.556
6.78	0.776	0.891			6.78	0.671	0.521
6.795	0.832	0.839			6.795	0.67	0.558
6.81	0.804	0.866			6.81	0.675	0.519
6.825	0.799	0.897			6.825	0.68	0.467
6.84	0.795	0.848			6.84	0.674	0.549
6.855	0.817	0.888			6.855	0.654	0.587
6.87	0.831	0.911			6.87	0.652	0.571
6.885	0.823	0.84			6.885	0.666	0.533
6.9	0.796	0.835			6.9	0.675	0.466
6.915	0.811	0.905			6.915	0.673	0.45
6.93	0.797	0.854			6.93	0.672	0.559
6.945	0.816	0.903			6.945	0.667	0.56
6.96	0.824	0.988			6.96	0.688	0.57
6.975	0.811	0.85			6.975	0.658	0.555
6.99	0.81	0.75			6.99	0.672	0.567
7.005	0.806	0.908			7.005	0.7	0.586
7.02	0.818	0.825			7.02	0.69	0.509
7.035	0.844	0.849			7.035	0.685	0.518
7.05	0.815	0.911			7.05	0.696	0.481
7.065	0.848	0.835			7.065	0.707	0.555
7.08	0.836	0.863			7.08	0.694	0.501
7.095	0.8	0.951			7.095	0.707	0.583
7.11	0.837	0.934			7.11	0.704	0.521
7.125	0.821	0.778			7.125	0.679	0.574
7.14	0.837	0.878			7.14	0.695	0.517
7.155	0.83	0.895			7.155	0.715	0.53
7.17	0.832	0.864			7.17	0.673	0.507
7.185	0.837	0.878			7.185	0.701	0.497
7.2	0.848	0.979			7.2	0.694	0.528
7.215	0.812	0.825			7.215	0.691	0.513
7.23	0.86	0.889			7.23	0.708	0.531
7.245	0.844	0.863			7.245	0.712	0.631
7.26	0.827	0.815			7.26	0.704	0.596
7.275	0.859	0.838			7.275	0.693	0.493
7.29	0.836	0.802			7.29	0.691	0.527
7.305	0.846	0.855			7.305	0.685	0.524
7.32	0.836	0.766			7.32	0.671	0.506
7.335	0.841	0.785			7.335	0.699	0.5
7.35	0.862	0.827			7.35	0.725	0.48
7.365	0.857	0.87			7.365	0.696	0.551
7.38	0.88	0.853			7.38	0.722	0.534
7.395	0.879	0.77			7.395	0.707	0.568
7.41	0.87	0.879			7.41	0.74	0.525
7.425	0.895	0.829			7.425	0.709	0.552
7.44	0.856	0.792			7.44	0.676	0.541
7.455	0.846	0.836			7.455	0.72	0.563
7.47	0.85	0.824			7.47	0.69	0.548
7.485	0.867	1.003			7.485	0.714	0.529
7.5	0.87	0.866			7.5	0.738	0.63
7.515	0.852	0.866			7.515	0.717	0.637
7.53	0.893	0.873			7.53	0.7	0.507
7.545	0.863	0.846			7.545	0.696	0.538
7.56	0.861	0.917			7.56	0.713	0.622
7.575	0.854	0.952			7.575	0.728	0.575
7.59	0.902	0.943			7.59	0.686	0.609
7.605	0.882	0.851			7.605	0.701	0.538
7.62	0.872	0.802			7.62	0.679	0.545
7.635	0.877	0.878			7.635	0.701	0.49
7.65	0.881	0.852			7.65	0.682	0.564
7.665	0.863	0.935			7.665	0.673	0.633
7.68	0.885	0.972			7.68	0.695	0.537
7.695	0.863	0.971			7.695	0.69	0.548
7.71	0.847	0.896			7.71	0.695	0.512
7.725	0.872	0.806			7.725	0.696	0.55
7.74	0.867	0.888			7.74	0.671	0.531
7.755	0.882	0.817			7.755	0.706	0.613
7.77	0.855	0.922			7.77	0.7	0.571
7.785	0.87	0.86			7.785	0.699	0.517
7.8	0.849	0.955			7.8	0.687	0.593
7.815	0.832	0.867			7.815	0.701	0.624
7.83	0.808	0.92			7.83	0.691	0.535
7.845	0.84	0.863			7.845	0.722	0.584
7.86	0.822	0.913			7.86	0.701	0.576
7.875	0.863	1.004			7.875	0.686	0.613
7.89	0.86	0.928			7.89	0.701	0.592
7.905	0.846	0.93			7.905	0.693	0.495
7.92	0.867	0.955			7.92	0.7	0.506
7.935	0.889	0.877			7.935	0.694	0.547
7.95	0.888	0.904			7.95	0.705	0.566
7.965	0.866	1.015			7.965	0.705	0.566
7.98	0.846	0.979			7.98	0.703	0.588
7.995	0.835	1.067			7.995	0.694	0.578
8.01	0.878	1.12			8.01	0.722	0.596
8.025	0.853	1.098			8.025	0.716	0.526
8.04	0.889	1.008			8.04	0.7	0.544
8.055	0.865	1.007			8.055	0.706	0.619
8.07	0.87	1.07			8.07	0.696	0.537
8.085	0.872	0.945			8.085	0.707	0.567
8.1	0.868	0.96			8.1	0.726	0.566
8.115	0.881	0.882			8.115	0.676	0.678
8.13	0.878	0.972			8.13	0.7	0.631
8.145	0.884	1.122			8.145	0.678	0.539
8.16	0.863	1.025			8.16	0.715	0.639
8.175	0.909	1.073			8.175	0.699	0.524
8.19	0.91	1.036			8.19	0.705	0.653
8.205	0.874	1.243			8.205	0.677	0.637
8.22	0.869	1.048			8.22	0.693	0.54
8.235	0.884	0.99			8.235	0.704	0.62
8.25	0.862	0.99			8.25	0.7	0.597
8.265	0.869	0.92			8.265	0.692	0.657
8.28	0.878	0.933			8.28	0.678	0.532
8.295	0.87	0.954			8.295	0.71	0.54
8.31	0.875	1.058			8.31	0.695	0.638
8.325	0.926	1.055			8.325	0.79	0.614
8.34	0.954	0.97			8.34	0.82	0.681
8.355	0.973	1.028			8.355	0.814	0.625
8.37	0.951	1.079			8.37	0.858	0.695
8.385	1.009	1.088			8.385	0.855	0.578
8.4	0.999	1.168			8.4	0.834	0.67
8.415	0.976	1.17			8.415	0.858	0.623
8.43	1.03	1.147			8.43	0.838	0.692
8.445	1.026	1.215			8.445	0.858	0.688
8.46	0.999	1.015			8.46	0.839	0.716
8.475	0.956	1.067			8.475	0.873	0.722
8.49	1.007	1.2			8.49	0.822	0.705
8.505	0.992	1.329			8.505	0.838	0.735
8.52	0.98	1.162			8.52	0.845	0.657
8.535	0.989	1.093			8.535	0.841	0.66
8.55	0.979	1.004			8.55	0.826	0.681
8.565	0.986	1.113			8.565	0.838	0.75
8.58	0.96	1.105			8.58	0.85	0.589
8.595	0.988	1.242			8.595	0.823	0.667
8.61	1.014	1.17			8.61	0.851	0.672
8.625	1.022	1.176			8.625	0.891	0.671
8.64	1.029	1.11			8.64	0.868	0.719
8.655	1.059	1.041			8.655	0.854	0.67
8.67	1.028	1.162			8.67	0.843	0.625
8.685	1.048	1.068			8.685	0.834	0.622
8.7	1.048	1.203			8.7	0.859	0.581
8.715	1.034	1.367			8.715	0.851	0.651
8.73	1.029	1.336			8.73	0.848	0.577
8.745	1.083	1.103			8.745	0.843	0.636
8.76	1.029	1.174			8.76	0.863	0.697
8.775	1.049	1.254			8.775	0.842	0.668
8.79	1.024	1.201			8.79	0.883	0.659
8.805	1.002	1.181			8.805	0.875	0.588
8.82	1.064	1.128			8.82	0.865	0.644
8.835	1.079	1.188			8.835	0.875	0.761
8.85	1.058	1.127			8.85	0.874	0.737
8.865	1.043	1.209			8.865	0.878	0.626
8.88	1.003	1.212			8.88	0.892	0.697
8.895	1.056	1.2			8.895	0.843	0.66
8.91	1.004	1.183			8.91	0.86	0.678
8.925	1.017	1.169			8.925	0.846	0.708
8.94	1.05	1.195			8.94	0.85	0.662
8.955	1.027	1.193			8.955	0.841	0.595
8.97	1.043	1.148			8.97	0.821	0.649
8.985	1.024	1.15			8.985	0.871	0.589
9	1.004	1.168			9	0.858	0.688
9.015	1.018	1.196			9.015	0.867	0.576
9.03	1.053	1.005			9.03	0.847	0.72
9.045	1.087	1.22			9.045	0.865	0.628
9.06	1.034	1.288			9.06	0.876	0.685
9.075	1.049	1.28			9.075	0.841	0.615
9.09	1.028	1.202			9.09	0.863	0.601
9.105	1.003	1.197			9.105	0.85	0.717
9.12	1.058	1.066			9.12	0.835	0.713
9.135	1.05	1.152			9.135	0.88	0.654
9.15	1.072	1.326			9.15	0.885	0.693
9.165	1.075	1.303			9.165	0.89	0.737
9.18	1.05	1.177			9.18	0.866	0.705
9.195	1.054	1.089			9.195	0.879	0.618
9.21	1.04	1.259			9.21	0.893	0.712
9.225	1.032	1.35			9.225	0.853	0.781
9.24	1.053	1.315			9.24	0.873	0.679
9.255	1.037	1.196			9.255	0.876	0.676
9.27	1.028	1.249			9.27	0.882	0.897
9.285	1.013	1.117			9.285	0.88	0.741
9.3	1.082	1.317			9.3	0.873	0.758
9.315	1.089	1.14			9.315	0.851	0.798
9.33	1.074	1.282			9.33	0.88	0.704
9.345	1.112	1.267			9.345	0.865	0.72
9.36	1.089	1.239			9.36	0.877	0.701
9.375	1.066	1.184			9.375	0.867	0.786
9.39	1.066	1.245			9.39	0.889	0.715
9.405	1.158	1.309			9.405	0.885	0.859
9.42	1.089	1.173			9.42	0.884	0.749
9.435	1.103	1.18			9.435	0.904	0.79
9.45	1.067	1.232			9.45	0.903	0.798
9.465	1.103	1.307			9.465	0.879	0.715
9.48	1.116	1.158			9.48	0.848	0.783
9.495	1.108	1.273			9.495	0.908	0.727
9.51	1.073	1.155			9.51	0.873	0.783
9.525	1.056	1.191			9.525	0.869	0.707
9.54	1.081	1.275			9.54	0.904	0.734
9.555	1.09	1.217			9.555	0.888	0.757
9.57	1.092	1.253			9.57	0.903	0.763
9.585	1.096	1.217			9.585	0.89	0.75
9.6	1.074	1.158			9.6	0.889	0.825
9.615	1.039	1.199			9.615	0.891	0.708
9.63	1.09	1.28			9.63	0.891	0.756
9.645	1.075	1.146			9.645	0.88	0.704
9.66	1.079	1.127			9.66	0.884	0.793
9.675	1.079	1.157			9.675	0.856	0.726
9.69	1.039	1.353			9.69	0.884	0.734
9.705	1.079	1.221			9.705	0.912	0.788
9.72	1.069	1.219			9.72	0.866	0.794
9.735	1.125	1.225			9.735	0.878	0.797
9.75	1.089	1.268			9.75	0.879	0.73
9.765	1.1	1.206			9.765	0.899	0.759
9.78	1.048	1.229			9.78	0.893	0.715
9.795	1.097	1.218			9.795	0.893	0.692
9.81	1.08	1.302			9.81	0.885	0.691
9.825	1.095	1.296			9.825	0.94	0.695
9.84	1.115	1.373			9.84	0.913	0.758
9.855	1.092	1.249			9.855	0.873	0.786
9.87	1.093	1.213			9.87	0.9	0.812
9.885	1.094	1.166			9.885	0.877	0.782
9.9	1.114	1.214			9.9	0.901	0.706
9.915	1.097	1.342			9.915	0.875	0.739
9.93	1.118	1.236			9.93	0.907	0.724
9.945	1.128	1.217			9.945	0.885	0.72
9.96	1.101	1.341			9.96	0.874	0.703
9.975	1.112	1.296			9.975	0.886	0.696
9.99	1.217	1.369			9.99	1.053	0.731
10.01	1.323	1.36			10.01	1.095	0.719
10.02	1.387	1.321			10.02	1.202	0.766
10.04	1.387	1.351			10.04	1.2	0.998
10.05	1.421	1.302			10.05	1.226	0.935
10.06	1.43	1.315			10.06	1.231	0.857
10.08	1.518	1.387			10.08	1.237	0.869
10.1	1.474	1.306			10.1	1.182	0.853
10.11	1.47	1.391			10.11	1.148	0.904
10.12	1.465	1.347			10.12	1.175	0.895
10.14	1.449	1.355			10.14	1.178	0.913
10.15	1.454	1.416			10.15	1.197	0.949
10.17	1.473	1.451			10.17	1.256	0.89
10.19	1.532	1.597			10.19	1.238	0.921
10.2	1.52	1.526			10.2	1.24	0.8
10.21	1.613	1.674			10.21	1.269	0.788
10.23	1.505	1.596			10.23	1.262	1.048
10.24	1.513	1.568			10.24	1.279	0.911
10.26	1.607	1.516			10.26	1.282	0.872
10.28	1.618	1.499			10.28	1.277	0.918
10.29	1.544	1.365			10.29	1.22	0.914
10.3	1.513	1.548			10.3	1.293	0.889
10.32	1.514	1.418			10.32	1.325	0.771
10.34	1.514	1.503			10.34	1.274	0.851
10.35	1.495	1.648			10.35	1.238	1.007
10.37	1.468	1.536			10.37	1.345	1.192
10.38	1.508	1.548			10.38	1.336	1.188
10.39	1.488	1.565			10.39	1.342	0.961
10.41	1.529	1.654			10.41	1.339	0.995
10.43	1.522	1.53			10.43	1.34	1.048
10.44	1.533	1.496			10.44	1.279	0.993
10.46	1.55	1.358			10.46	1.305	1.175
10.47	1.448	1.4			10.47	1.345	1.151
10.48	1.53	1.476			10.48	1.312	1.018
10.5	1.581	1.472			10.5	1.256	1.121
10.52	1.565	1.426			10.52	1.322	0.976
10.53	1.522	1.392			10.53	1.427	1.081
10.54	1.605	1.437			10.54	1.364	1.042
10.56	1.576	1.465			10.56	1.372	1.013
10.57	1.512	1.413			10.57	1.348	1.129
10.59	1.44	1.37			10.59	1.355	1.045
10.61	1.45	1.521			10.61	1.427	1.066
10.62	1.511	1.515			10.62	1.454	1.129
10.63	1.532	1.433			10.63	1.386	1.288
10.65	1.498	1.383			10.65	1.437	1.027
10.66	1.54	1.385			10.66	1.391	1.213
10.68	1.519	1.528			10.68	1.436	1.092
10.7	1.492	1.434			10.7	1.388	1.155
10.71	1.544	1.5			10.71	1.387	1.239
10.72	1.474	1.328			10.72	1.35	1.291
10.74	1.507	1.333			10.74	1.427	1.221
10.76	1.534	1.43			10.76	1.411	1.304
10.77	1.542	1.415			10.77	1.438	1.072
10.79	1.523	1.44			10.79	1.403	1.063
10.8	1.529	1.359			10.8	1.449	1.018
10.81	1.565	1.429			10.81	1.506	1.198
10.83	1.572	1.46			10.83	1.467	1.145
10.85	1.505	1.533			10.85	1.496	1.111
10.86	1.526	1.519			10.86	1.467	0.99
10.88	1.491	1.574			10.88	1.459	1.052
10.89	1.599	1.442			10.89	1.517	0.988
10.9	1.525	1.414			10.9	1.483	1.017
10.92	1.56	1.401			10.92	1.53	1.079
10.94	1.568	1.487			10.94	1.461	1.099
10.95	1.554	1.358			10.95	1.507	1.021
10.96	1.601	1.38			10.96	1.56	0.986
10.98	1.598	1.418			10.98	1.537	1.064
10.99	1.596	1.463			10.99	1.564	1.083
11.01	1.67	1.43			11.01	1.468	0.97
11.03	1.57	1.48			11.03	1.489	1.024
11.04	1.568	1.437			11.04	1.498	1.05
11.05	1.572	1.446			11.05	1.553	1.179
11.07	1.508	1.545			11.07	1.595	1.077
11.09	1.603	1.464			11.09	1.608	1.079
11.1	1.593	1.437			11.1	1.557	1.016
11.12	1.616	1.448			11.12	1.583	1.012
11.13	1.623	1.405			11.13	1.626	1.133
11.14	1.58	1.393			11.14	1.603	1.068
11.16	1.632	1.503			11.16	1.512	0.98
11.18	1.673	1.498			11.18	1.608	0.956
11.19	1.652	1.416			11.19	1.611	1.032
11.21	1.679	1.539			11.21	1.57	0.878
11.22	1.668	1.535			11.22	1.6	1.026
11.23	1.716	1.567			11.23	1.527	1.073
11.25	1.734	1.536			11.25	1.571	1.099
11.27	1.657	1.515			11.27	1.543	1.126
11.28	1.647	1.598			11.28	1.513	1.142
11.29	1.63	1.665			11.29	1.549	1.017
11.31	1.663	1.709			11.31	1.594	1.17
11.32	1.697	1.7			11.32	1.548	1.096
11.34	1.748	1.728			11.34	1.523	0.995
11.36	1.791	1.665			11.36	1.544	1.041
11.37	1.762	1.702			11.37	1.598	0.975
11.38	1.801	1.655			11.38	1.633	0.998
11.4	1.861	1.671			11.4	1.475	1.022
11.41	1.915	1.736			11.41	1.534	1.044
11.43	1.771	1.573			11.43	1.543	1.229
11.45	1.752	1.681			11.45	1.528	1.071
11.46	1.87	1.648			11.46	1.525	1.062
11.47	1.802	1.486			11.47	1.533	1.113
11.49	1.842	1.701			11.49	1.474	0.964
11.51	1.806	1.721			11.51	1.48	0.966
11.52	1.809	1.72			11.52	1.484	1.035
11.54	1.855	1.663			11.54	1.464	0.958
11.55	1.727	1.767			11.55	1.461	0.945
11.56	1.733	1.652			11.56	1.447	1.031
11.58	1.648	1.832			11.58	1.458	1.037
11.6	1.638	1.953			11.6	1.435	1.071
11.61	1.634	1.783			11.61	1.477	1.081
11.62	1.675	1.645			11.62	1.51	1.042
11.64	1.701	1.722			11.64	1.507	0.926
11.65	1.667	1.663			11.65	1.507	1.016
11.67	1.678	1.833			11.67	1.555	1.07
11.69	1.68	1.775			11.69	1.491	1.067
11.7	1.66	1.728			11.7	1.489	1
11.71	1.624	1.628			11.71	1.462	1.03
11.73	1.669	1.851			11.73	1.474	1.023
11.74	1.701	1.851			11.74	1.57	0.984
11.76	1.766	1.912			11.76	1.48	0.939
11.78	1.679	1.827			11.78	1.417	1.002
11.79	1.704	2.046			11.79	1.456	0.982
11.8	1.74	1.935			11.8	1.466	1.036
11.82	1.76	1.871			11.82	1.47	1.001
11.84	1.714	1.768			11.84	1.487	0.926
11.85	1.817	1.697			11.85	1.437	1.009
11.87	1.784	1.922			11.87	1.47	0.99
11.88	1.755	1.928			11.88	1.533	1.063
11.89	1.775	1.862			11.89	1.521	1.12
11.91	1.741	1.867			11.91	1.503	0.913
11.93	1.824	1.807			11.93	1.519	1.037
11.94	1.766	1.743			11.94	1.481	1.053
11.96	1.766	1.735			11.96	1.494	0.983
11.97	1.719	1.74			11.97	1.496	0.943
11.98	1.765	1.787			11.98	1.501	1.01
12	1.745	1.755			12	1.623	0.946
12.02	1.786	1.794			12.02	1.598	1.028
12.03	1.771	1.75			12.03	1.514	0.937
12.04	1.79	1.826			12.04	1.558	1.061
12.06	1.77	1.747			12.06	1.588	1.04
12.07	1.821	1.685			12.07	1.588	1.143
12.09	1.783	1.687			12.09	1.529	0.949
12.11	1.825	1.604			12.11	1.494	1.026
12.12	1.828	1.653			12.12	1.548	1.012
12.13	1.79	1.611			12.13	1.574	1.203
12.15	1.834	1.853			12.15	1.624	1.161
12.16	1.792	1.726			12.16	1.555	1.068
12.18	1.838	1.926			12.18	1.612	1.026
12.2	1.976	1.914			12.2	1.528	1.041
12.21	1.96	1.804			12.21	1.602	0.971
12.22	1.879	1.782			12.22	1.61	1.029
12.24	1.902	1.806			12.24	1.609	1.002
12.26	1.825	1.784			12.26	1.563	1.071
12.27	1.851	1.749			12.27	1.559	1.104
12.29	1.832	1.741			12.29	1.571	1.093
12.3	1.914	1.75			12.3	1.65	1.272
12.31	1.897	1.776			12.31	1.692	1.18
12.33	1.864	1.822			12.33	1.699	1.113
12.35	1.746	1.816			12.35	1.661	1.164
12.36	1.875	1.893			12.36	1.688	1.211
12.38	1.871	1.911			12.38	1.8	1.047
12.39	1.814	1.898			12.39	1.845	1.135
12.4	1.883	1.977			12.4	1.85	1.175
12.42	1.807	1.829			12.42	1.817	1.276
12.44	1.825	1.905			12.44	1.794	1.309
12.45	1.859	1.901			12.45	1.762	1.108
12.46	1.77	1.926			12.46	1.823	1.182
12.48	1.739	1.976			12.48	1.9	1.196
12.49	1.75	2.01			12.49	1.826	1.155
12.51	1.746	1.895			12.51	1.835	1.139
12.53	1.858	2.096			12.53	1.863	1.249
12.54	1.859	1.945			12.54	1.786	1.335
12.55	1.946	2.021			12.55	1.699	1.264
12.57	1.841	2.042			12.57	1.739	1.181
12.59	1.81	1.99			12.59	1.77	1.204
12.6	1.805	1.919			12.6	1.796	1.283
12.62	1.854	2.029			12.62	1.793	1.338
12.63	1.849	1.885			12.63	1.723	1.309
12.64	1.962	1.937			12.64	1.758	1.343
12.66	1.881	1.925			12.66	1.797	1.242
12.68	1.816	1.959			12.68	1.788	1.287
12.69	1.83	1.905			12.69	1.776	1.212
12.71	1.87	1.934			12.71	1.818	1.197
12.72	1.829	2.063			12.72	1.826	1.325
12.73	1.898	1.888			12.73	1.83	1.167
12.75	1.927	1.874			12.75	1.879	1.116
12.77	1.85	1.776			12.77	1.916	1.21
12.78	1.814	1.837			12.78	1.938	1.04
12.79	1.777	1.833			12.79	1.866	1.113
12.81	1.779	1.993			12.81	1.878	1.088
12.82	1.802	1.942			12.82	1.984	1.005
12.84	1.824	1.925			12.84	2.008	1.087
12.86	1.786	1.889			12.86	1.943	1.022
12.87	1.851	1.903			12.87	1.878	1.006
12.88	1.811	1.841			12.88	1.829	0.986
12.9	1.833	1.906			12.9	1.859	0.946
12.91	1.844	1.918			12.91	1.83	1.129
12.93	1.895	1.922			12.93	1.772	1.099
12.95	1.928	2.07			12.95	1.864	1.241
12.96	1.914	2.031			12.96	1.902	1.163
12.97	1.833	2.034			12.97	1.893	1.329
12.99	1.857	2.014			12.99	1.917	1.389
13.01	1.991	2.037			13.01	1.978	1.411
13.02	2.031	1.96			13.02	2.037	1.156
13.04	2.067	2.022			13.04	2.035	1.103
13.05	2.03	2.148			13.05	2.031	1.424
13.06	1.962	2.029			13.06	2.031	1.442
13.08	2.067	2.112			13.08	2.07	1.291
13.1	2.062	2.064			13.1	2.082	1.294
13.11	2.05	2.086			13.11	1.924	1.228
13.12	2.038	1.936			13.12	1.856	1.013
13.14	1.953	1.845			13.14	1.822	0.916
13.15	1.885	1.816			13.15	1.765	1.114
13.17	2.036	2.026			13.17	1.736	1.09
13.19	1.932	1.983			13.19	1.704	1.112
13.2	1.893	1.877			13.2	1.719	0.951
13.21	1.946	1.889			13.21	1.637	1.038
13.23	1.941	1.79			13.23	1.779	0.957
13.24	1.993	1.898			13.24	1.787	1.077
13.26	1.862	1.827			13.26	1.784	1.129
13.28	1.84	1.895			13.28	1.815	1.049
13.29	1.867	1.849			13.29	1.774	1.155
13.3	1.888	1.883			13.3	1.674	1.096
13.32	1.813	1.975			13.32	1.74	1.009
13.34	1.829	1.979			13.34	1.826	1.238
13.35	1.914	1.808			13.35	1.816	1.153
13.37	1.858	1.996			13.37	1.846	1.19
13.38	2.022	1.94			13.38	1.846	1.032
13.39	1.997	2.009			13.39	1.81	1.301
13.41	1.968	2.136			13.41	1.782	1.18
13.43	1.999	1.884			13.43	1.704	1.549
13.44	1.977	1.859			13.44	1.793	1.718
13.46	2.01	2.097			13.46	1.763	1.74
13.47	2.047	2.052			13.47	1.768	1.619
13.48	1.961	1.903			13.48	1.825	1.677
13.5	1.965	2.089			13.5	1.799	1.462
13.52	1.99	2.022			13.52	1.877	1.57
13.53	2.037	1.938			13.53	1.79	1.597
13.54	2.025	1.986			13.54	1.753	1.491
13.56	1.984	1.973			13.56	1.736	1.554
13.57	1.96	1.995			13.57	1.77	1.481
13.59	2.023	2.06			13.59	1.838	1.529
13.61	2.021	2.088			13.61	1.783	1.557
13.62	2.017	1.924			13.62	1.78	1.516
13.63	1.966	1.905			13.63	1.899	1.545
13.65	1.947	2.016			13.65	1.889	1.524
13.66	2.096	1.901			13.66	1.886	1.52
13.68	2.032	1.919			13.68	1.913	1.53
13.7	1.989	2.026			13.7	1.903	1.645
13.71	1.925	1.984			13.71	1.943	1.816
13.72	1.955	2.052			13.72	1.905	1.65
13.74	1.984	2.038			13.74	1.919	1.706
13.76	1.966	2.022			13.76	1.931	1.511
13.77	1.886	1.975			13.77	1.888	1.739
13.79	1.858	1.963			13.79	1.978	1.616
13.8	1.837	1.892			13.8	1.987	1.715
13.81	1.859	1.913			13.81	2.014	1.678
13.83	1.876	1.902			13.83	2.084	1.726
13.85	1.992	1.812			13.85	2.092	1.893
13.86	1.909	1.835			13.86	2.072	1.732
13.88	1.873	2.046			13.88	2.011	1.531
13.89	1.896	2.02			13.89	1.949	1.721
13.9	1.896	1.943			13.9	1.929	1.765
13.92	1.867	1.831			13.92	1.994	1.62
13.94	1.829	1.848			13.94	2.035	1.734
13.95	1.845	1.901			13.95	1.952	1.75
13.96	1.772	1.932			13.96	1.952	1.907
13.98	1.827	1.881			13.98	1.964	1.832
13.99	1.774	1.831			13.99	2.05	1.789
14.01	1.83	1.93			14.01	1.95	1.726
14.03	1.84	1.929			14.03	2.034	1.915
14.04	1.844	1.969			14.04	1.997	1.674
14.05	1.89	1.984			14.05	1.96	1.66
14.07	1.921	1.948			14.07	2.034	1.441
14.09	1.853	1.926			14.09	1.995	1.518
14.1	1.857	2.068			14.1	2.053	1.579
14.12	1.874	2.089			14.12	2.05	1.673
14.13	1.956	2.078			14.13	1.989	1.604
14.14	1.983	2.044			14.14	1.983	1.837
14.16	1.966	1.855			14.16	2.01	1.64
14.18	1.972	1.953			14.18	2.105	1.682
14.19	1.974	1.967			14.19	2.145	1.709
14.21	1.97	1.951			14.21	2.108	1.879
14.22	2.01	2.036			14.22	2.133	1.916
14.23	2.004	1.982			14.23	2.168	1.751
14.25	1.97	2.07			14.25	1.955	1.696
14.27	1.96	1.859			14.27	1.979	1.531
14.28	1.968	1.984			14.28	1.988	1.586
14.29	1.96	2.048			14.29	1.928	1.651
14.31	1.947	1.965			14.31	1.942	1.681
14.32	1.878	1.918			14.32	2.011	1.711
14.34	1.881	2.074			14.34	2.06	1.784
14.36	1.881	1.981			14.36	2.085	1.679
14.37	1.895	2.066			14.37	2.043	1.581
14.38	1.986	1.99			14.38	2.114	1.679
14.4	1.934	2.058			14.4	1.979	1.599
14.41	1.873	2.08			14.41	2.025	1.643
14.43	2.007	2.014			14.43	1.984	1.611
14.45	2.023	2.126			14.45	1.913	1.624
14.46	2.028	1.965			14.46	1.982	1.679
14.47	1.966	1.912			14.47	1.922	1.756
14.49	2.034	2.069			14.49	1.984	1.863
14.51	2.039	1.939			14.51	1.974	1.819
14.52	2.036	2.12			14.52	1.924	1.773
14.54	2.049	2.055			14.54	1.998	2.105
14.55	2.119	2.069			14.55	1.987	2.007
14.56	2.147	2.13			14.56	1.986	1.954
14.58	2.076	2.088			14.58	2.082	1.903
14.6	2.066	2.136			14.6	2.008	1.956
14.61	2.117	2.056			14.61	2.018	1.967
14.62	2.086	2.099			14.62	1.979	1.94
14.64	2.071	2.202			14.64	1.907	1.788
14.65	2.064	2.071			14.65	1.918	1.824
14.67	2.017	1.99			14.67	1.972	1.762
14.69	2.048	2.018			14.69	1.962	1.671
14.7	2.032	1.961			14.7	1.992	1.81
14.71	2.042	1.929			14.71	2.079	1.843
14.73	2.118	1.952			14.73	2.093	1.723
14.74	2.179	2.07			14.74	2.056	1.6
14.76	2.121	2.218			14.76	1.994	1.496
14.78	2.063	2.101			14.78	1.946	1.569
14.79	2.069	2.057			14.79	1.982	1.519
14.8	2.039	2.032			14.8	1.993	1.584
14.82	2.034	1.999			14.82	1.98	1.601
14.84	1.993	2.021			14.84	2.026	1.605
14.85	1.931	2.244			14.85	2.063	1.489
14.87	2.005	2.153			14.87	2.065	1.515
14.88	2.056	2.091			14.88	2.006	1.517
14.89	2.064	2.164			14.89	1.991	1.541
14.91	2.051	2.009			14.91	2.082	1.409
14.93	2.111	2.046			14.93	2.025	1.555
14.94	2.149	2.246			14.94	1.944	1.589
14.96	2.275	2.017			14.96	2.011	1.53
14.97	2.1	2.093			14.97	2.115	1.527
14.98	2.183	2.107			14.98	2.031	1.601
15	2.15	2.046			15	2.029	1.512
15.02	2.11	2.156			15.02	2.064	1.564
15.03	2.114	1.984			15.03	2.02	1.557
15.04	2.14	2.114			15.04	2.151	1.59
15.06	2.091	2.071			15.06	2.113	1.508
15.07	2.085	2.145			15.07	2.072	1.539
15.09	2.012	1.922			15.09	2.092	1.642
15.11	2.032	1.843			15.11	2.12	1.724
15.12	1.978	2.072			15.12	2.037	1.72
15.13	1.956	2.014			15.13	2.079	1.493
15.15	1.917	2.134			15.15	2.066	1.507
15.16	1.982	2.123			15.16	2.132	1.542
15.18	2.038	2.153			15.18	2.092	1.471
15.2	1.948	2.139			15.2	2.149	1.438
15.21	2.042	2.121			15.21	2.197	1.533
15.22	2.041	2.135			15.22	2.127	1.552
15.24	2.129	2.051			15.24	2.02	1.585
15.26	2.231	2.05			15.26	1.995	1.391
15.27	2.076	2.12			15.27	2.052	1.526
15.29	2.106	2.14			15.29	2.096	1.543
15.3	2.091	2.15			15.3	2.034	1.448
15.31	2.065	2.03			15.31	2.035	1.562
15.33	2.089	1.938			15.33	2.069	1.438
15.35	2.083	1.92			15.35	2.098	1.419
15.36	2.11	2.079			15.36	2.054	1.34
15.38	1.971	2.218			15.38	2.051	1.547
15.39	2.184	2.279			15.39	2.087	1.421
15.4	2.141	2.122			15.4	2.072	1.497
15.42	2.203	2.02			15.42	2.016	1.568
15.44	2.134	2.085			15.44	2	1.526
15.45	2.065	2.113			15.45	2.078	1.719
15.46	2.103	1.99			15.46	2.086	1.694
15.48	2.059	2.136			15.48	2.149	1.633
15.49	2.024	2.105			15.49	2.064	1.557
15.51	2.056	2.096			15.51	2.071	1.59
15.53	2.006	2.048			15.53	2.113	1.659
15.54	1.994	2.09			15.54	2.13	1.755
15.55	1.982	2.177			15.55	2.091	1.528
15.57	2.003	2.136			15.57	1.973	1.719
15.59	2.021	1.998			15.59	2.131	1.629
15.6	1.938	2.134			15.6	2.14	1.595
15.62	1.997	2.27			15.62	2.111	1.675
15.63	2.105	2.134			15.63	1.986	1.543
15.64	2.144	2.205			15.64	1.998	1.427
15.66	2.11	2.179			15.66	2.067	1.487
15.68	2.072	2.163			15.68	2.117	1.531
15.69	2.002	2.172			15.69	2.221	1.377
15.71	2.032	2.138			15.71	2.236	1.445
15.72	1.964	2.185			15.72	2.153	1.438
15.73	2.022	2.26			15.73	2.083	1.349
15.75	2.056	2.275			15.75	2.011	1.418
15.77	2.083	2.28			15.77	2.032	1.483
15.78	2.063	2.442			15.78	2.035	1.389
15.79	2.002	2.423			15.79	2.045	1.359
15.81	2.062	2.408			15.81	2.05	1.464
15.82	2.118	2.352			15.82	2.095	1.344
15.84	2.122	2.34			15.84	2.083	1.387
15.86	2.17	2.302			15.86	2.176	1.307
15.87	2.176	2.262			15.87	2.085	1.437
15.88	2.163	2.356			15.88	2.035	1.476
15.9	2.053	2.373			15.9	2.032	1.481
15.91	2.133	2.466			15.91	1.948	1.43
15.93	2.165	2.432			15.93	1.897	1.42
15.95	2.086	2.494			15.95	1.898	1.39
15.96	2.104	2.471			15.96	1.858	1.462
15.97	2.078	2.46			15.97	1.912	1.486
15.99	2.058	2.415			15.99	1.965	1.438
16	2.096	2.548			16	1.968	1.45
16.02	2.157	2.555			16.02	1.978	1.411
16.04	2.137	2.387			16.04	1.991	1.542
16.05	2.036	2.519			16.05	1.972	1.401
16.07	2.083	2.368			16.07	1.993	1.484
16.08	2.081	2.374			16.08	1.905	1.449
16.09	2.163	2.416			16.09	1.962	1.474
16.11	2.102	2.374			16.11	1.966	1.403
16.12	2.088	2.433			16.12	2.001	1.325
16.14	2.074	2.367			16.14	2.015	1.328
16.16	2.107	2.427			16.16	1.96	1.305
16.17	2.136	2.359			16.17	1.976	1.435
16.18	2.202	2.524			16.18	2.009	1.446
16.2	2.183	2.422			16.2	1.97	1.319
16.21	2.059	2.492			16.21	1.993	1.356
16.23	2.073	2.524			16.23	1.99	1.323
16.25	2.174	2.461			16.25	1.99	1.373
16.26	2.081	2.542			16.26	2.02	1.368
16.27	2.011	2.463			16.27	2.055	1.443
16.29	2.091	2.526			16.29	2.068	1.567
16.3	2.094	2.38			16.3	1.978	1.422
16.32	2.11	2.463			16.32	2.03	1.343
16.34	2.132	2.457			16.34	1.987	1.418
16.35	2.15	2.396			16.35	1.933	1.322
16.36	2.051	2.51			16.36	1.916	1.347
16.38	2.065	2.386			16.38	1.899	1.333
16.39	2.037	2.353			16.39	1.957	1.478
16.41	2.011	2.412			16.41	2.031	1.329
16.43	2.062	2.41			16.43	2.03	1.326
16.44	2.034	2.531			16.44	2.048	1.411
16.45	2.099	2.513			16.45	1.978	1.425
16.47	2.055	2.393			16.47	1.975	1.408
16.48	2.113	2.374			16.48	2.023	1.431
16.5	2.059	2.491			16.5	1.998	1.388
16.52	2.011	2.309			16.52	1.994	1.423
16.53	2.022	2.376			16.53	1.968	1.465
16.55	2.044	2.329			16.55	1.919	1.494
16.56	2.036	2.373			16.56	1.967	1.47
16.57	1.994	2.261			16.57	1.993	1.505
16.59	1.998	2.197			16.59	2.052	1.478
16.61	2.093	2.233			16.61	2.119	1.494
16.62	2.011	2.26			16.62	2.154	1.497
16.64	2.08	2.333			16.64	2.156	1.544
16.65	2.038	2.407			16.65	2.146	1.503
16.66	2.057	2.573			16.66	2.058	1.594
16.68	2	2.385			16.68	2.123	1.567
16.7	2.006	2.344			16.7	2.105	1.552
16.71	2.024	2.576			16.71	2.058	1.508
16.73	1.992	2.512			16.73	2.092	1.438
16.74	1.969	2.503			16.74	2.069	1.537
16.75	2.04	2.348			16.75	2.075	1.484
16.77	2.009	2.411			16.77	2.132	1.573
16.79	2.043	2.495			16.79	2.103	1.483
16.8	2.101	2.435			16.8	2.105	1.497
16.82	2.104	2.562			16.82	2.197	1.566
16.83	2.079	2.316			16.83	2.152	1.454
16.84	2.053	2.253			16.84	2.135	1.45
16.86	2.107	2.372			16.86	2.139	1.604
16.88	2.075	2.311			16.88	2.057	1.376
16.89	2.051	2.303			16.89	2.097	1.395
16.91	2.016	2.343			16.91	2.02	1.437
16.92	2.097	2.236			16.92	2.033	1.411
16.93	2.14	2.237			16.93	2.018	1.501
16.95	2.206	2.271			16.95	2.016	1.366
16.96	2.192	2.306			16.96	2.085	1.223
16.98	2.099	2.248			16.98	2.052	1.248
17	2.049	2.436			17	2.061	1.43
17.01	2.005	2.34			17.01	1.95	1.493
17.02	2.156	2.304			17.02	2.042	1.313
17.04	2.102	2.404			17.04	1.989	1.428
17.05	2.102	2.363			17.05	1.963	1.518
17.07	2.126	2.39			17.07	2.025	1.387
17.09	2.007	2.359			17.09	1.945	1.494
17.1	2.031	2.429			17.1	2.022	1.407
17.11	2.058	2.442			17.11	2.023	1.571
17.13	2.208	2.304			17.13	2.015	1.448
17.14	2.148	2.365			17.14	1.974	1.642
17.16	2.055	2.348			17.16	2.026	1.545
17.18	2.042	2.336			17.18	2.023	1.44
17.19	1.967	2.364			17.19	1.988	1.488
17.2	2.072	2.229			17.2	2.017	1.521
17.22	2.143	2.279			17.22	1.989	1.531
17.23	2.046	2.259			17.23	1.989	1.48
17.25	2.065	2.408			17.25	2.07	1.548
17.27	2.139	2.349			17.27	2.057	1.524
17.28	2.046	2.335			17.28	2.078	1.474
17.3	2.111	2.389			17.3	2.078	1.429
17.31	2.093	2.545			17.31	2.05	1.314
17.32	2.101	2.443			17.32	2.071	1.186
17.34	2.086	2.531			17.34	2.088	1.155
17.36	2.138	2.589			17.36	2.104	1.09
17.37	2.177	2.568			17.37	2.178	1.176
17.39	2.15	2.539			17.39	2.159	1.234
17.4	2.166	2.726			17.4	2.117	1.281
17.41	2.154	2.549			17.41	2.228	1.11
17.43	2.187	2.536			17.43	2.202	1.182
17.45	2.26	2.643			17.45	2.208	1.094
17.46	2.165	2.499			17.46	2.151	1.057
17.48	2.246	2.429			17.48	2.191	1.065
17.49	2.217	2.391			17.49	2.047	1.101
17.5	2.163	2.313			17.5	2.144	1.166
17.52	2.161	2.446			17.52	2.118	1.3
17.54	2.211	2.484			17.54	2.147	1.081
17.55	2.178	2.477			17.55	2.196	1.085
17.57	2.135	2.415			17.57	2.19	1.128
17.58	2.083	2.307			17.58	2.13	1.097
17.59	2.117	2.451			17.59	2.153	1.219
17.61	2.143	2.525			17.61	2.112	1.112
17.62	2.117	2.499			17.62	2.175	1.193
17.64	2.117	2.438			17.64	2.138	1.216
17.66	2.13	2.277			17.66	2.165	1.28
17.67	2.134	2.287			17.67	2.172	1.357
17.68	2.151	2.286			17.68	2.173	1.312
17.7	2.199	2.362			17.7	2.174	1.324
17.71	2.174	2.368			17.71	2.118	1.316
17.73	2.217	2.279			17.73	2.197	1.416
17.75	2.181	2.313			17.75	2.24	1.279
17.76	2.216	2.428			17.76	2.224	1.233
17.77	2.186	2.517			17.77	2.164	1.209
17.79	2.081	2.397			17.79	2.246	1.522
17.8	2.103	2.522			17.8	2.284	1.477
17.82	2.037	2.484			17.82	2.262	1.411
17.84	2.095	2.517			17.84	2.245	1.375
17.85	2.116	2.326			17.85	2.264	1.397
17.86	2.083	2.241			17.86	2.284	1.356
17.88	2.135	2.192			17.88	2.287	1.361
17.89	2.124	2.239			17.89	2.333	1.531
17.91	2.073	2.231			17.91	2.27	1.505
17.93	2.126	2.255			17.93	2.237	1.489
17.94	2.102	2.273			17.94	2.34	1.48
17.95	2.057	2.28			17.95	2.366	1.41
17.97	2.066	2.262			17.97	2.345	1.374
17.98	2.121	2.355			17.98	2.322	1.453
18	2.065	2.366			18	2.456	1.417
18.02	2.119	2.099			18.02	2.3	1.412
18.03	2.145	2.177			18.03	2.349	1.334
18.05	2.143	2.296			18.05	2.294	1.296
18.06	2.179	2.084			18.06	2.289	1.417
18.07	2.084	2.103			18.07	2.364	1.491
18.09	2.115	2.297			18.09	2.339	1.346
18.11	2.103	2.241			18.11	2.312	1.31
18.12	2.088	2.241			18.12	2.37	1.334
18.14	2.033	2.15			18.14	2.319	1.394
18.15	2.042	2.214			18.15	2.283	1.39
18.16	2.032	2.221			18.16	2.241	1.392
18.18	2.096	2.179			18.18	2.287	1.385
18.2	2.024	2.162			18.2	2.29	1.32
18.21	1.974	2.127			18.21	2.318	1.358
18.23	1.96	2.124			18.23	2.319	1.333
18.24	1.957	2.149			18.24	2.375	1.322
18.25	1.996	2			18.25	2.335	1.172
18.27	1.979	2.112			18.27	2.405	1.264
18.29	1.933	2.038			18.29	2.427	1.201
18.3	1.912	2.075			18.3	2.352	1.393
18.32	1.934	2.063			18.32	2.329	1.395
18.33	1.93	2.204			18.33	2.268	1.375
18.34	1.996	2.057			18.34	2.191	1.188
18.36	2.025	2.059			18.36	2.269	1.268
18.38	1.994	2.119			18.38	2.257	1.282
18.39	2.002	2.178			18.39	2.264	1.286
18.41	2.058	2.068			18.41	2.296	1.237
18.42	2.038	2.234			18.42	2.33	1.369
18.43	2.008	2.201			18.43	2.269	1.262
18.45	2.031	2.202			18.45	2.316	1.274
18.46	2.036	2.321			18.46	2.358	1.409
18.48	1.938	2.309			18.48	2.296	1.294
18.5	1.987	2.393			18.5	2.296	1.332
18.51	1.986	2.313			18.51	2.304	1.34
18.52	1.93	2.243			18.52	2.39	1.367
18.54	1.959	2.284			18.54	2.425	1.344
18.55	1.897	2.297			18.55	2.38	1.305
18.57	1.952	2.245			18.57	2.3	1.268
18.59	2.013	2.29			18.59	2.368	1.298
18.6	1.981	2.408			18.6	2.377	1.243
18.61	1.938	2.398			18.61	2.388	1.245
18.63	1.903	2.303			18.63	2.404	1.191
18.64	1.937	2.268			18.64	2.347	1.194
18.66	1.946	2.261			18.66	2.275	1.156
18.68	2.053	2.267			18.68	2.297	1.178
18.69	2.04	2.217			18.69	2.287	1.265
18.7	2.07	2.166			18.7	2.3	1.17
18.72	2.071	2.211			18.72	2.224	1.255
18.73	2.018	2.137			18.73	2.171	1.186
18.75	2.063	2.174			18.75	2.248	1.264
18.77	1.992	2.199			18.77	2.237	1.329
18.78	2.066	2.14			18.78	2.266	1.257
18.8	2.051	2.123			18.8	2.272	1.276
18.81	2	2.165			18.81	2.372	1.219
18.82	2.077	2.239			18.82	2.289	1.119
18.84	2.05	2.232			18.84	2.345	1.156
18.86	2.009	2.045			18.86	2.297	1.2
18.87	2.064	2.176			18.87	2.303	1.125
18.89	2.014	2.147			18.89	2.293	1.169
18.9	1.964	2.166			18.9	2.205	1.165
18.91	2.042	2.145			18.91	2.217	1.223
18.93	2.048	2.235			18.93	2.239	1.228
18.95	2.007	2.265			18.95	2.148	1.251
18.96	2.039	2.383			18.96	2.249	1.263
18.98	2.026	2.42			18.98	2.198	1.161
18.99	2.071	2.412			18.99	2.232	1.175
19	2.071	2.29			19	2.24	1.255
19.02	2.063	2.312			19.02	2.206	1.228
19.04	2.077	2.356			19.04	2.199	1.218
19.05	2.096	2.378			19.05	2.187	1.209
19.07	2.078	2.494			19.07	2.212	1.231
19.08	2.06	2.483			19.08	2.195	1.188
19.09	2.154	2.383			19.09	2.125	1.211
19.11	2.172	2.453			19.11	2.104	1.252
19.12	2.099	2.401			19.12	2.183	1.26
19.14	2.059	2.399			19.14	2.198	1.179
19.16	2.104	2.393			19.16	2.201	1.114
19.17	2.139	2.487			19.17	2.201	1.152
19.18	2.166	2.347			19.18	2.214	1.137
19.2	2.142	2.404			19.2	2.195	1.18
19.21	2.119	2.24			19.21	2.223	1.166
19.23	2.12	2.38			19.23	2.205	1.186
19.25	2.196	2.366			19.25	2.206	1.322
19.26	2.128	2.258			19.26	2.171	1.229
19.27	2.154	2.222			19.27	2.15	1.234
19.29	2.076	2.307			19.29	2.147	1.2
19.3	2.06	2.351			19.3	2.196	1.107
19.32	2.059	2.352			19.32	2.227	1.064
19.34	2.079	2.304			19.34	2.112	1.121
19.35	2.057	2.35			19.35	2.118	1.12
19.36	2.064	2.292			19.36	2.138	1.115
19.38	2.026	2.349			19.38	2.176	1.095
19.39	2.069	2.237			19.39	2.158	1.15
19.41	1.998	2.178			19.41	2.214	1.118
19.43	1.959	2.178			19.43	2.274	0.979
19.44	2.001	2.166			19.44	2.293	1.095
19.45	2.002	2.189			19.45	2.235	1.047
19.47	1.982	2.256			19.47	2.237	1.171
19.48	1.902	2.275			19.48	2.334	1.148
19.5	1.985	2.348			19.5	2.296	1.301
19.52	2.027	2.231			19.52	2.218	1.205
19.53	2.075	2.223			19.53	2.285	1.243
19.55	2.144	2.257			19.55	2.318	1.282
19.56	2.033	2.285			19.56	2.261	1.248
19.57	2.059	2.127			19.57	2.244	1.268
19.59	1.998	2.066			19.59	2.226	1.203
19.61	2.075	2.127			19.61	2.276	1.282
19.62	2.048	2.106			19.62	2.299	1.321
19.64	2.086	2.15			19.64	2.382	1.219
19.65	2.05	2.203			19.65	2.354	1.124
19.66	2.043	2.179			19.66	2.345	1.24
19.68	1.974	2.281			19.68	2.408	1.183
19.7	1.949	2.267			19.7	2.36	1.126
19.71	1.941	2.222			19.71	2.35	1.334
19.73	1.927	2.07			19.73	2.34	1.377
19.74	1.976	2.184			19.74	2.377	1.41
19.75	1.976	2.159			19.75	2.411	1.333
19.77	1.964	2.182			19.77	2.352	1.205
19.79	2.011	2.215			19.79	2.458	1.318
19.8	1.931	2.174			19.8	2.464	1.4
19.82	1.88	2.157			19.82	2.519	1.43
19.83	1.948	2.237			19.83	2.415	1.26
19.84	1.94	2.276			19.84	2.391	1.25
19.86	1.968	2.206			19.86	2.477	1.385
19.88	1.918	2.215			19.88	2.475	1.356
19.89	1.975	2.123			19.89	2.436	1.362
19.91	2.015	1.994			19.91	2.366	1.457
19.92	2.051	2.012			19.92	2.42	1.429
19.93	2.037	2.244			19.93	2.357	1.422
19.95	2.046	2.377			19.95	2.342	1.471
19.96	2.004	2.309			19.96	2.382	1.345
19.98	2.073	2.33			19.98	2.356	1.39
20	2.002	2.2			20	2.382	1.369
20.01	2.021	2.224			20.01	2.366	1.397
20.02	1.998	2.041			20.02	2.392	1.325
20.04	1.976	2.115			20.04	2.424	1.307
20.05	1.969	2.117			20.05	2.408	1.387
20.07	2.022	2.285			20.07	2.46	1.315
20.09	1.974	2.131			20.09	2.398	1.324
20.1	2.077	2.021			20.1	2.339	1.333
20.11	2.062	2.175			20.11	2.248	1.317
20.13	2.119	2.167			20.13	2.289	1.22
20.14	2.079	2.257			20.14	2.309	1.239
20.16	2.049	2.454			20.16	2.346	1.326
20.18	2.033	2.264			20.18	2.319	1.283
20.19	2.094	2.247			20.19	2.334	1.269
20.2	1.994	2.199			20.2	2.307	1.268
20.22	2.018	2.091			20.22	2.275	1.304
20.23	2.057	2.301			20.23	2.326	1.285
20.25	2.003	2.318			20.25	2.301	1.327
20.27	1.989	2.319			20.27	2.3	1.381
20.28	1.973	2.384			20.28	2.361	1.312
20.3	1.896	2.434			20.3	2.251	1.399
20.31	1.968	2.496			20.31	2.341	1.386
20.32	1.951	2.442			20.32	2.346	1.431
20.34	1.998	2.521			20.34	2.306	1.286
20.36	1.963	2.455			20.36	2.316	1.516
20.37	2.036	2.411			20.37	2.279	1.303
20.39	1.929	2.403			20.39	2.275	1.366
20.4	1.896	2.382			20.4	2.239	1.467
20.41	1.937	2.272			20.41	2.173	1.391
20.43	1.926	2.457			20.43	2.142	1.469
20.45	1.89	2.259			20.45	2.168	1.533
20.46	1.938	2.091			20.46	2.196	1.467
20.48	1.961	2.068			20.48	2.207	1.433
20.49	2.002	2.181			20.49	2.114	1.534
20.5	2.003	2.035			20.5	2.099	1.403
20.52	2.008	2.151			20.52	2.096	1.464
20.54	2.034	2.117			20.54	2.12	1.523
20.55	1.974	2.102			20.55	2.054	1.415
20.57	1.951	2.273			20.57	2.09	1.451
20.58	1.984	2.179			20.58	2.079	1.434
20.59	2.004	2.288			20.59	2.084	1.468
20.61	2.008	2.354			20.61	2.055	1.438
20.62	2.08	2.507			20.62	2.06	1.372
20.64	2.056	2.535			20.64	2.07	1.476
20.66	2.064	2.651			20.66	2.068	1.433
20.67	2.029	2.629			20.67	2.132	1.428
20.68	2.008	2.711			20.68	2.154	1.388
20.7	2.004	2.674			20.7	2.169	1.43
20.71	1.956	2.651			20.71	2.148	1.501
20.73	1.951	2.729			20.73	2.243	1.425
20.75	1.888	2.42			20.75	2.245	1.392
20.76	1.956	2.425			20.76	2.238	1.395
20.77	1.995	2.332			20.77	2.299	1.397
20.79	1.933	2.615			20.79	2.271	1.379
20.8	2.003	2.634			20.8	2.355	1.437
20.82	1.954	2.529			20.82	2.384	1.394
20.84	1.963	2.507			20.84	2.421	1.484
20.85	1.921	2.442			20.85	2.393	1.33
20.86	1.924	2.59			20.86	2.448	1.451
20.88	1.993	2.515			20.88	2.392	1.444
20.89	1.97	2.328			20.89	2.407	1.392
20.91	1.999	2.49			20.91	2.503	1.349
20.93	2.026	2.452			20.93	2.436	1.375
20.94	2.07	2.487			20.94	2.498	1.368
20.95	1.969	2.51			20.95	2.474	1.504
20.97	1.994	2.722			20.97	2.505	1.378
20.98	2.027	2.608			20.98	2.388	1.342
21	1.976	2.688			21	2.416	1.494
21.02	1.997	2.581			21.02	2.305	1.429
21.03	1.945	2.542			21.03	2.353	1.454
21.05	1.992	2.571			21.05	2.289	1.451
21.06	1.92	2.498			21.06	2.248	1.392
21.07	1.927	2.504			21.07	2.305	1.427
21.09	1.931	2.427			21.09	2.318	1.403
21.11	2.039	2.265			21.11	2.355	1.398
21.12	2.038	2.34			21.12	2.264	1.334
21.14	2.035	2.433			21.14	2.215	1.425
21.15	2.016	2.38			21.15	2.124	1.401
21.16	1.963	2.528			21.16	2.174	1.464
21.18	2.026	2.558			21.18	2.186	1.443
21.2	1.987	2.516			21.2	2.186	1.375
21.21	2.003	2.421			21.21	2.264	1.392
21.23	2.102	2.474			21.23	2.269	1.327
21.24	2.051	2.602			21.24	2.191	1.348
21.25	2.016	2.388			21.25	2.236	1.404
21.27	2.041	2.535			21.27	2.17	1.353
21.29	2.062	2.316			21.29	2.208	1.428
21.3	2.093	2.506			21.3	2.114	1.45
21.32	2.053	2.597			21.32	2.152	1.31
21.33	1.982	2.724			21.33	2.186	1.421
21.34	1.923	2.653			21.34	2.21	1.37
21.36	1.917	2.658			21.36	2.274	1.382
21.38	1.94	2.607			21.38	2.307	1.436
21.39	2.06	2.517			21.39	2.196	1.332
21.41	1.985	2.384			21.41	2.288	1.495
21.42	2.056	2.33			21.42	2.228	1.455
21.43	2.055	2.297			21.43	2.191	1.401
21.45	2.074	2.334			21.45	2.178	1.382
21.46	2.086	2.459			21.46	2.178	1.361
21.48	1.998	2.559			21.48	2.203	1.399
21.5	2.056	2.56			21.5	2.198	1.424
21.51	2.077	2.459			21.51	2.265	1.387
21.52	2.071	2.326			21.52	2.24	1.423
21.54	1.976	2.265			21.54	2.24	1.462
21.55	2.053	2.345			21.55	2.273	1.403
21.57	2.015	2.376			21.57	2.246	1.297
21.59	2.035	2.375			21.59	2.279	1.312
21.6	2.015	2.447			21.6	2.33	1.323
21.61	2.074	2.431			21.61	2.327	1.289
21.63	2.064	2.471			21.63	2.337	1.362
21.64	1.999	2.51			21.64	2.247	1.448
21.66	2.009	2.356			21.66	2.308	1.361
21.68	2.064	2.523			21.68	2.339	1.405
21.69	2.122	2.392			21.69	2.29	1.28
21.7	2.081	2.321			21.7	2.22	1.365
21.72	2.095	2.383			21.72	2.309	1.345
21.73	2.032	2.51			21.73	2.403	1.367
21.75	2.002	2.379			21.75	2.341	1.413
21.77	2.005	2.412			21.77	2.355	1.398
21.78	2.07	2.282			21.78	2.406	1.362
21.8	1.999	2.367			21.8	2.325	1.466
21.81	2.028	2.424			21.81	2.313	1.392
21.82	2.085	2.377			21.82	2.258	1.464
21.84	2.053	2.218			21.84	2.319	1.498
21.86	2.015	2.15			21.86	2.293	1.468
21.87	2.07	2.33			21.87	2.253	1.315
21.89	2.036	2.364			21.89	2.17	1.421
21.9	1.967	2.328			21.9	2.208	1.39
21.91	2.041	2.316			21.91	2.24	1.433
21.93	2.108	2.391			21.93	2.275	1.35
21.95	2.031	2.274			21.95	2.304	1.437
21.96	2.029	2.288			21.96	2.307	1.378
21.98	2.008	2.278			21.98	2.269	1.456
21.99	2.049	2.282			21.99	2.324	1.437
22	2.05	2.331			22	2.356	1.449
22.02	2.053	2.319			22.02	2.467	1.604
22.04	2.045	2.425			22.04	2.284	1.429
22.05	2.012	2.311			22.05	2.267	1.468
22.07	1.974	2.376			22.07	2.244	1.375
22.08	2.086	2.317			22.08	2.228	1.388
22.09	2.1	2.301			22.09	2.24	1.38
22.11	2.167	2.252			22.11	2.229	1.508
22.12	2.063	2.262			22.12	2.285	1.363
22.14	2.106	2.328			22.14	2.234	1.334
22.16	2.109	2.321			22.16	2.211	1.411
22.17	2.083	2.496			22.17	2.224	1.314
22.18	2.063	2.329			22.18	2.233	1.342
22.2	2.053	2.538			22.2	2.249	1.331
22.21	2.051	2.335			22.21	2.177	1.389
22.23	2.045	2.249			22.23	2.144	1.437
22.25	2.119	2.42			22.25	2.233	1.494
22.26	2.042	2.386			22.26	2.173	1.445
22.27	2.085	2.528			22.27	2.233	1.336
22.29	2.076	2.48			22.29	2.214	1.426
22.3	2.137	2.433			22.3	2.161	1.38
22.32	2.147	2.372			22.32	2.221	1.358
22.34	2.17	2.38			22.34	2.161	1.425
22.35	2.062	2.402			22.35	2.185	1.459
22.36	2.092	2.35			22.36	2.196	1.496
22.38	2.153	2.26			22.38	2.168	1.398
22.39	2.195	2.237			22.39	2.121	1.404
22.41	2.123	2.258			22.41	2.215	1.525
22.43	2.19	2.253			22.43	2.171	1.445
22.44	2.15	2.238			22.44	2.186	1.356
22.45	2.165	2.227			22.45	2.28	1.331
22.47	2.154	2.278			22.47	2.228	1.368
22.48	2.103	2.122			22.48	2.211	1.299
22.5	2.166	2.248			22.5	2.186	1.288
22.52	2.188	2.238			22.52	2.163	1.224
22.53	2.232	2.213			22.53	2.219	1.228
22.55	2.176	2.316			22.55	2.165	1.361
22.56	2.165	2.264			22.56	2.188	1.308
22.57	2.191	2.208			22.57	2.208	1.355
22.59	2.146	2.204			22.59	2.192	1.427
22.61	2.112	2.037			22.61	2.135	1.373
22.62	2.118	2.195			22.62	2.128	1.284
22.64	2.14	2.186			22.64	1.992	1.298
22.65	2.162	2.355			22.65	2.123	1.341
22.66	2.092	2.288			22.66	2.107	1.274
22.68	2.032	2.317			22.68	2.15	1.431
22.7	2.069	2.444			22.7	2.208	1.352
22.71	2.098	2.358			22.71	2.183	1.393
22.73	2.103	2.24			22.73	2.188	1.344
22.74	2.089	2.364			22.74	2.198	1.33
22.75	2.086	2.268			22.75	2.157	1.386
22.77	2.164	2.331			22.77	2.184	1.403
22.79	2.116	2.328			22.79	2.224	1.349
22.8	2.175	2.364			22.8	2.267	1.315
22.82	2.161	2.451			22.82	2.287	1.432
22.83	2.147	2.443			22.83	2.203	1.379
22.84	2.161	2.5			22.84	2.17	1.284
22.86	2.118	2.509			22.86	2.137	1.356
22.88	2.172	2.427			22.88	2.21	1.259
22.89	2.131	2.517			22.89	2.193	1.403
22.91	2.159	2.416			22.91	2.236	1.436
22.92	2.151	2.515			22.92	2.197	1.363
22.93	2.112	2.57			22.93	2.203	1.388
22.95	2.084	2.434			22.95	2.259	1.346
22.96	2.139	2.462			22.96	2.297	1.481
22.98	2.123	2.353			22.98	2.206	1.468
23	2.082	2.388			23	2.19	1.398
23.01	2.105	2.474			23.01	2.157	1.317
23.02	2.097	2.384			23.02	2.277	1.31
23.04	2.112	2.321			23.04	2.322	1.398
23.05	2.122	2.368			23.05	2.321	1.354
23.07	2.007	2.487			23.07	2.212	1.317
23.09	2.098	2.425			23.09	2.196	1.38
23.1	2.157	2.486			23.1	2.204	1.374
23.11	2.096	2.579			23.11	2.257	1.425
23.13	2.026	2.455			23.13	2.305	1.448
23.14	2.047	2.613			23.14	2.238	1.428
23.16	2.051	2.467			23.16	2.237	1.395
23.18	2.015	2.428			23.18	2.237	1.46
23.19	1.972	2.614			23.19	2.269	1.481
23.2	1.983	2.596			23.2	2.267	1.362
23.22	1.994	2.525			23.22	2.3	1.393
23.23	1.977	2.529			23.23	2.3	1.322
23.25	2.026	2.628			23.25	2.273	1.323
23.27	1.967	2.475			23.27	2.365	1.442
23.28	2.086	2.7			23.28	2.263	1.274
23.3	2.112	2.657			23.3	2.303	1.374
23.31	2.16	2.623			23.31	2.296	1.43
23.32	2.171	2.64			23.32	2.24	1.395
23.34	2.071	2.541			23.34	2.247	1.369
23.36	2.153	2.749			23.36	2.325	1.353
23.37	2.092	2.685			23.37	2.324	1.354
23.39	2.106	2.617			23.39	2.341	1.276
23.4	2.199	2.563			23.4	2.346	1.301
23.41	2.204	2.654			23.41	2.376	1.463
23.43	2.132	2.537			23.43	2.398	1.378
23.45	2.109	2.556			23.45	2.402	1.364
23.46	2.118	2.88			23.46	2.338	1.311
23.48	2.1	2.779			23.48	2.395	1.334
23.49	2.117	2.578			23.49	2.42	1.297
23.5	2.194	2.73			23.5	2.375	1.319
23.52	2.186	2.783			23.52	2.35	1.296
23.54	2.116	2.535			23.54	2.462	1.383
23.55	2.146	2.618			23.55	2.408	1.314
23.57	2.097	2.598			23.57	2.361	1.41
23.58	2.12	2.454			23.58	2.353	1.342
23.59	2.089	2.394			23.59	2.311	1.225
23.61	2.089	2.453			23.61	2.323	1.227
23.62	2.09	2.515			23.62	2.338	1.417
23.64	2.088	2.433			23.64	2.265	1.276
23.66	2.08	2.502			23.66	2.254	1.389
23.67	2.055	2.655			23.67	2.227	1.419
23.68	2.047	2.431			23.68	2.253	1.345
23.7	2.069	2.751			23.7	2.291	1.382
23.71	2.066	2.764			23.71	2.293	1.372
23.73	2.087	2.687			23.73	2.279	1.3
23.75	2.115	2.454			23.75	2.335	1.372
23.76	2.054	2.615			23.76	2.256	1.326
23.77	2.084	2.512			23.77	2.234	1.319
23.79	2.04	2.517			23.79	2.218	1.263
23.8	1.998	2.634			23.8	2.255	1.3
23.82	2.024	2.79			23.82	2.264	1.299
23.84	2.051	2.742			23.84	2.249	1.28
23.85	2.109	2.567			23.85	2.252	1.276
23.86	2.177	2.548			23.86	2.222	1.276
23.88	2.175	2.602			23.88	2.248	1.337
23.89	2.168	2.538			23.89	2.232	1.386
23.91	2.21	2.526			23.91	2.212	1.372
23.93	2.128	2.47			23.93	2.248	1.437
23.94	2.085	2.482			23.94	2.191	1.358
23.95	2.101	2.411			23.95	2.237	1.409
23.97	2.144	2.472			23.97	2.217	1.414
23.98	2.077	2.438			23.98	2.212	1.48
24	2.067	2.486			24	2.233	1.406
24.02	2.052	2.39			24.02	2.238	1.433
24.03	2.059	2.563			24.03	2.23	1.378
24.05	2.031	2.57			24.05	2.195	1.361
24.06	2.038	2.51			24.06	2.305	1.412
24.07	2.094	2.4			24.07	2.331	1.347
24.09	2.111	2.582			24.09	2.289	1.409
24.11	2.175	2.514			24.11	2.219	1.34
24.12	2.133	2.733			24.12	2.182	1.453
24.14	2.165	2.37			24.14	2.378	1.4
24.15	2.187	2.426			24.15	2.35	1.398
24.16	2.115	2.421			24.16	2.322	1.367
24.18	2.111	2.519			24.18	2.315	1.427
24.2	2.183	2.455			24.2	2.365	1.487
24.21	2.147	2.391			24.21	2.332	1.393
24.23	2.088	2.536			24.23	2.303	1.332
24.24	2.178	2.59			24.24	2.325	1.37
24.25	2.207	2.534			24.25	2.265	1.392
24.27	2.121	2.51			24.27	2.29	1.384
24.29	2.162	2.312			24.29	2.208	1.313
24.3	2.102	2.294			24.3	2.292	1.242
24.32	2.179	2.423			24.32	2.234	1.327
24.33	2.186	2.354			24.33	2.277	1.348
24.34	2.222	2.554			24.34	2.212	1.297
24.36	2.169	2.391			24.36	2.237	1.344
24.38	2.16	2.548			24.38	2.253	1.345
24.39	2.108	2.555			24.39	2.246	1.364
24.41	2.087	2.454			24.41	2.314	1.289
24.42	2.127	2.537			24.42	2.276	1.35
24.43	2.142	2.468			24.43	2.345	1.26
24.45	2.181	2.355			24.45	2.243	1.354
24.46	2.144	2.456			24.46	2.271	1.331
24.48	2.139	2.518			24.48	2.254	1.284
24.5	2.133	2.428			24.5	2.327	1.301
24.51	2.164	2.463			24.51	2.275	1.361
24.52	2.12	2.45			24.52	2.342	1.385
24.54	2.166	2.518			24.54	2.288	1.34
24.55	2.175	2.292			24.55	2.289	1.308
24.57	2.122	2.336			24.57	2.29	1.331
24.59	2.141	2.323			24.59	2.363	1.371
24.6	2.159	2.253			24.6	2.324	1.349
24.61	2.166	2.225			24.61	2.32	1.288
24.63	2.147	2.275			24.63	2.294	1.335
24.64	2.16	2.367			24.64	2.396	1.363
24.66	2.23	2.49			24.66	2.326	1.303
24.68	2.214	2.358			24.68	2.273	1.326
24.69	2.191	2.507			24.69	2.249	1.316
24.7	2.184	2.506			24.7	2.306	1.384
24.72	2.254	2.403			24.72	2.305	1.322
24.73	2.258	2.419			24.73	2.283	1.352
24.75	2.159	2.435			24.75	2.31	1.367
24.77	2.159	2.546			24.77	2.233	1.281
24.78	2.094	2.438			24.78	2.2	1.398
24.8	2.058	2.4			24.8	2.215	1.33
24.81	2.052	2.523			24.81	2.256	1.308
24.82	2.061	2.505			24.82	2.317	1.434
24.84	2.044	2.577			24.84	2.236	1.345
24.86	2.104	2.434			24.86	2.296	1.343
24.87	2.124	2.356			24.87	2.339	1.391
24.89	2.154	2.412			24.89	2.28	1.34
24.9	2.11	2.424			24.9	2.337	1.252
24.91	2.178	2.485			24.91	2.323	1.257
24.93	2.121	2.529			24.93	2.371	1.272
24.95	2.119	2.488			24.95	2.401	1.296
24.96	2.162	2.434			24.96	2.333	1.266
24.98	2.187	2.515			24.98	2.374	1.45
24.99	2.121	2.55			24.99	2.27	1.318
25	2.21	2.427			25	2.32	1.349
25.02	2.169	2.396			25.02	2.372	1.343
25.04	2.175	2.26			25.04	2.29	1.345
25.05	2.15	2.468			25.05	2.311	1.239
25.07	2.189	2.525			25.07	2.343	1.341
25.08	2.09	2.433			25.08	2.333	1.321
25.09	2.209	2.591			25.09	2.317	1.32
25.11	2.2	2.484			25.11	2.329	1.374
25.12	2.234	2.361			25.12	2.324	1.288
25.14	2.176	2.518			25.14	2.476	1.342
25.16	2.179	2.458			25.16	2.386	1.359
25.17	2.22	2.503			25.17	2.435	1.384
25.18	2.166	2.408			25.18	2.459	1.353
25.2	2.176	2.512			25.2	2.407	1.416
25.21	2.215	2.625			25.21	2.409	1.442
25.23	2.203	2.515			25.23	2.433	1.377
25.25	2.175	2.439			25.25	2.437	1.437
25.26	2.147	2.627			25.26	2.425	1.32
25.27	2.208	2.58			25.27	2.452	1.373
25.29	2.151	2.638			25.29	2.396	1.423
25.3	2.175	2.624			25.3	2.329	1.387
25.32	2.194	2.597			25.32	2.431	1.387
25.34	2.174	2.726			25.34	2.304	1.445
25.35	2.197	2.566			25.35	2.383	1.464
25.36	2.08	2.651			25.36	2.297	1.504
25.38	2.112	2.595			25.38	2.342	1.427
25.39	2.148	2.524			25.39	2.347	1.431
25.41	2.146	2.461			25.41	2.371	1.427
25.43	2.247	2.69			25.43	2.37	1.49
25.44	2.196	2.446			25.44	2.3	1.447
25.45	2.134	2.337			25.45	2.35	1.492
25.47	2.064	2.582			25.47	2.368	1.435
25.48	2.119	2.441			25.48	2.392	1.46
25.5	2.094	2.576			25.5	2.347	1.373
25.52	2.064	2.614			25.52	2.341	1.377
25.53	2.099	2.604			25.53	2.35	1.266
25.55	2.096	2.606			25.55	2.312	1.411
25.56	2.094	2.593			25.56	2.4	1.436
25.57	2.154	2.624			25.57	2.395	1.391
25.59	2.112	2.369			25.59	2.382	1.436
25.61	2.245	2.557			25.61	2.436	1.431
25.62	2.199	2.442			25.62	2.425	1.463
25.64	2.209	2.445			25.64	2.452	1.595
25.65	2.107	2.417			25.65	2.464	1.509
25.66	2.093	2.511			25.66	2.368	1.514
25.68	2.216	2.453			25.68	2.47	1.498
25.7	2.209	2.465			25.7	2.413	1.501
25.71	2.217	2.433			25.71	2.448	1.567
25.73	2.179	2.426			25.73	2.5	1.478
25.74	2.192	2.394			25.74	2.501	1.472
25.75	2.297	2.367			25.75	2.478	1.439
25.77	2.301	2.403			25.77	2.472	1.366
25.79	2.335	2.531			25.79	2.407	1.528
25.8	2.264	2.495			25.8	2.397	1.464
25.82	2.28	2.479			25.82	2.357	1.417
25.83	2.208	2.583			25.83	2.374	1.411
25.84	2.305	2.602			25.84	2.364	1.45
25.86	2.255	2.547			25.86	2.451	1.458
25.88	2.276	2.586			25.88	2.445	1.338
25.89	2.287	2.707			25.89	2.468	1.326
25.91	2.271	2.594			25.91	2.517	1.464
25.92	2.244	2.655			25.92	2.536	1.444
25.93	2.236	2.518			25.93	2.493	1.508
25.95	2.259	2.518			25.95	2.443	1.456
25.96	2.221	2.471			25.96	2.4	1.393
25.98	2.26	2.42			25.98	2.311	1.408
26	2.199	2.357			26	2.359	1.405
26.01	2.253	2.436			26.01	2.31	1.433
26.02	2.275	2.409			26.02	2.349	1.367
26.04	2.289	2.422			26.04	2.402	1.457
26.05	2.224	2.392			26.05	2.446	1.391
26.07	2.26	2.498			26.07	2.422	1.386
26.09	2.286	2.56			26.09	2.444	1.329
26.1	2.301	2.414			26.1	2.422	1.469
26.11	2.245	2.425			26.11	2.384	1.355
26.13	2.267	2.573			26.13	2.412	1.415
26.14	2.277	2.581			26.14	2.411	1.409
26.16	2.345	2.548			26.16	2.381	1.482
26.18	2.285	2.521			26.18	2.334	1.413
26.19	2.29	2.482			26.19	2.425	1.365
26.2	2.281	2.605			26.2	2.364	1.407
26.22	2.303	2.712			26.22	2.423	1.403
26.23	2.348	2.794			26.23	2.46	1.368
26.25	2.272	2.892			26.25	2.459	1.327
26.27	2.362	2.624			26.27	2.409	1.368
26.28	2.344	2.687			26.28	2.425	1.354
26.3	2.299	2.63			26.3	2.403	1.304
26.31	2.312	2.476			26.31	2.345	1.292
26.32	2.268	2.64			26.32	2.35	1.352
26.34	2.269	2.616			26.34	2.43	1.408
26.36	2.379	2.626			26.36	2.337	1.527
26.37	2.407	2.555			26.37	2.417	1.327
26.39	2.368	2.478			26.39	2.395	1.294
26.4	2.398	2.47			26.4	2.369	1.397
26.41	2.409	2.376			26.41	2.397	1.27
26.43	2.304	2.496			26.43	2.323	1.421
26.45	2.27	2.612			26.45	2.328	1.394
26.46	2.313	2.472			26.46	2.369	1.45
26.48	2.246	2.628			26.48	2.364	1.406
26.49	2.267	2.651			26.49	2.384	1.446
26.5	2.355	2.543			26.5	2.432	1.449
26.52	2.361	2.632			26.52	2.413	1.423
26.54	2.339	2.562			26.54	2.389	1.412
26.55	2.352	2.493			26.55	2.562	1.498
26.57	2.334	2.321			26.57	2.534	1.456
26.58	2.384	2.314			26.58	2.448	1.536
26.59	2.362	2.365			26.59	2.436	1.594
26.61	2.276	2.503			26.61	2.448	1.466
26.62	2.256	2.528			26.62	2.409	1.424
26.64	2.329	2.523			26.64	2.314	1.411
26.66	2.294	2.488			26.66	2.291	1.404
26.67	2.347	2.489			26.67	2.302	1.496
26.68	2.26	2.505			26.68	2.344	1.475
26.7	2.21	2.585			26.7	2.335	1.5
26.71	2.26	2.559			26.71	2.35	1.501
26.73	2.259	2.476			26.73	2.412	1.574
26.75	2.307	2.517			26.75	2.386	1.418
26.76	2.315	2.474			26.76	2.408	1.406
26.77	2.246	2.534			26.77	2.376	1.452
26.79	2.282	2.39			26.79	2.353	1.445
26.8	2.282	2.474			26.8	2.369	1.356
26.82	2.325	2.376			26.82	2.315	1.398
26.84	2.412	2.432			26.84	2.299	1.362
26.85	2.321	2.405			26.85	2.308	1.365
26.86	2.311	2.337			26.86	2.373	1.371
26.88	2.396	2.405			26.88	2.346	1.384
26.89	2.409	2.355			26.89	2.36	1.472
26.91	2.393	2.326			26.91	2.491	1.439
26.93	2.414	2.406			26.93	2.434	1.469
26.94	2.319	2.347			26.94	2.457	1.548
26.95	2.389	2.361			26.95	2.461	1.509
26.97	2.361	2.304			26.97	2.406	1.41
26.98	2.304	2.49			26.98	2.375	1.35
27	2.289	2.427			27	2.399	1.425
27.02	2.312	2.484			27.02	2.396	1.316
27.03	2.333	2.591			27.03	2.376	1.464
27.05	2.348	2.466			27.05	2.389	1.362
27.06	2.353	2.401			27.06	2.37	1.374
27.07	2.301	2.392			27.07	2.46	1.458
27.09	2.39	2.286			27.09	2.403	1.573
27.11	2.467	2.516			27.11	2.442	1.385
27.12	2.365	2.417			27.12	2.483	1.335
27.14	2.325	2.502			27.14	2.378	1.424
27.15	2.376	2.422			27.15	2.512	1.386
27.16	2.375	2.373			27.16	2.449	1.359
27.18	2.371	2.433			27.18	2.486	1.397
27.2	2.393	2.48			27.2	2.537	1.413
27.21	2.357	2.331			27.21	2.463	1.406
27.23	2.279	2.501			27.23	2.416	1.39
27.24	2.362	2.46			27.24	2.3	1.403
27.25	2.263	2.392			27.25	2.269	1.369
27.27	2.243	2.431			27.27	2.329	1.475
27.29	2.288	2.535			27.29	2.365	1.46
27.3	2.327	2.446			27.3	2.347	1.426
27.32	2.246	2.479			27.32	2.359	1.432
27.33	2.273	2.524			27.33	2.291	1.402
27.34	2.362	2.471			27.34	2.321	1.467
27.36	2.349	2.402			27.36	2.295	1.307
27.38	2.358	2.47			27.38	2.355	1.391
27.39	2.351	2.398			27.39	2.344	1.458
27.41	2.306	2.528			27.41	2.279	1.48
27.42	2.269	2.429			27.42	2.28	1.412
27.43	2.314	2.383			27.43	2.302	1.444
27.45	2.303	2.262			27.45	2.396	1.528
27.46	2.32	2.284			27.46	2.363	1.453
27.48	2.27	2.359			27.48	2.4	1.482
27.5	2.221	2.477			27.5	2.406	1.439
27.51	2.253	2.353			27.51	2.371	1.413
27.52	2.26	2.388			27.52	2.259	1.315
27.54	2.245	2.447			27.54	2.336	1.431
27.55	2.158	2.293			27.55	2.379	1.358
27.57	2.179	2.408			27.57	2.384	1.437
27.59	2.15	2.447			27.59	2.342	1.308
27.6	2.207	2.56			27.6	2.371	1.409
27.61	2.233	2.514			27.61	2.361	1.327
27.63	2.256	2.446			27.63	2.346	1.342
27.64	2.336	2.349			27.64	2.368	1.315
27.66	2.252	2.392			27.66	2.339	1.345
27.68	2.283	2.403			27.68	2.34	1.382
27.69	2.188	2.465			27.69	2.349	1.41
27.7	2.233	2.445			27.7	2.328	1.344
27.72	2.164	2.374			27.72	2.318	1.349
27.73	2.163	2.307			27.73	2.397	1.422
27.75	2.169	2.367			27.75	2.362	1.303
27.77	2.179	2.507			27.77	2.401	1.319
27.78	2.205	2.564			27.78	2.444	1.352
27.8	2.183	2.516			27.8	2.38	1.224
27.81	2.277	2.454			27.81	2.387	1.373
27.82	2.256	2.506			27.82	2.356	1.282
27.84	2.275	2.341			27.84	2.332	1.353
27.86	2.245	2.443			27.86	2.317	1.265
27.87	2.367	2.479			27.87	2.274	1.28
27.89	2.254	2.28			27.89	2.317	1.297
27.9	2.259	2.359			27.9	2.327	1.315
27.91	2.288	2.512			27.91	2.347	1.359
27.93	2.249	2.396			27.93	2.315	1.315
27.95	2.296	2.311			27.95	2.34	1.349
27.96	2.266	2.321			27.96	2.427	1.346
27.98	2.256	2.336			27.98	2.385	1.331
27.99	2.238	2.291			27.99	2.423	1.347
28	2.218	2.408			28	2.47	1.455
28.02	2.289	2.485			28.02	2.434	1.336
28.04	2.245	2.547			28.04	2.388	1.353
28.05	2.279	2.315			28.05	2.463	1.301
28.07	2.22	2.567			28.07	2.41	1.316
28.08	2.25	2.523			28.08	2.39	1.268
28.09	2.245	2.442			28.09	2.436	1.262
28.11	2.251	2.445			28.11	2.342	1.318
28.12	2.195	2.355			28.12	2.467	1.242
28.14	2.276	2.257			28.14	2.524	1.397
28.16	2.245	2.309			28.16	2.573	1.375
28.17	2.269	2.487			28.17	2.535	1.329
28.18	2.22	2.345			28.18	2.519	1.361
28.2	2.29	2.451			28.2	2.671	1.395
28.21	2.343	2.339			28.21	2.628	1.444
28.23	2.359	2.276			28.23	2.533	1.288
28.25	2.37	2.367			28.25	2.624	1.408
28.26	2.288	2.413			28.26	2.549	1.371
28.27	2.345	2.425			28.27	2.437	1.291
28.29	2.288	2.501			28.29	2.452	1.345
28.3	2.309	2.533			28.3	2.403	1.335
28.32	2.303	2.385			28.32	2.473	1.323
28.34	2.32	2.479			28.34	2.454	1.218
28.35	2.245	2.401			28.35	2.502	1.27
28.36	2.225	2.501			28.36	2.471	1.308
28.38	2.137	2.486			28.38	2.573	1.274
28.39	2.18	2.293			28.39	2.496	1.325
28.41	2.241	2.306			28.41	2.48	1.333
28.43	2.166	2.4			28.43	2.479	1.321
28.44	2.204	2.445			28.44	2.398	1.208
28.45	2.203	2.312			28.45	2.353	1.241
28.47	2.273	2.394			28.47	2.404	1.271
28.48	2.276	2.44			28.48	2.467	1.311
28.5	2.321	2.431			28.5	2.419	1.291
28.52	2.266	2.26			28.52	2.561	1.346
28.53	2.225	2.193			28.53	2.515	1.286
28.55	2.289	2.308			28.55	2.51	1.318
28.56	2.325	2.322			28.56	2.407	1.394
28.57	2.341	2.341			28.57	2.562	1.367
28.59	2.257	2.417			28.59	2.456	1.377
28.61	2.293	2.387			28.61	2.535	1.409
28.62	2.442	2.32			28.62	2.558	1.365
28.64	2.355	2.297			28.64	2.473	1.355
28.65	2.295	2.395			28.65	2.419	1.228
28.66	2.3	2.276			28.66	2.493	1.273
28.68	2.292	2.301			28.68	2.573	1.322
28.7	2.378	2.326			28.7	2.58	1.322
28.71	2.422	2.326			28.71	2.47	1.238
28.73	2.464	2.324			28.73	2.525	1.316
28.74	2.472	2.333			28.74	2.476	1.358
28.75	2.434	2.348			28.75	2.422	1.425
28.77	2.479	2.333			28.77	2.394	1.396
28.79	2.487	2.324			28.79	2.455	1.44
28.8	2.471	2.3			28.8	2.422	1.359
28.82	2.479	2.184			28.82	2.435	1.35
28.83	2.454	2.223			28.83	2.452	1.384
28.84	2.381	2.261			28.84	2.443	1.324
28.86	2.33	2.189			28.86	2.41	1.389
28.88	2.402	2.224			28.88	2.442	1.379
28.89	2.404	2.306			28.89	2.393	1.287
28.91	2.381	2.307			28.91	2.361	1.357
28.92	2.332	2.291			28.92	2.397	1.403
28.93	2.29	2.409			28.93	2.432	1.316
28.95	2.34	2.438			28.95	2.414	1.401
28.96	2.332	2.26			28.96	2.428	1.465
28.98	2.376	2.304			28.98	2.499	1.398
29	2.353	2.58			29	2.481	1.538
29.01	2.242	2.484			29.01	2.483	1.46
29.02	2.191	2.459			29.02	2.391	1.411
29.04	2.2	2.393			29.04	2.383	1.429
29.05	2.233	2.343			29.05	2.475	1.489
29.07	2.199	2.269			29.07	2.418	1.549
29.09	2.211	2.238			29.09	2.461	1.631
29.1	2.252	2.502			29.1	2.415	1.399
29.11	2.306	2.386			29.11	2.462	1.491
29.13	2.348	2.354			29.13	2.417	1.352
29.14	2.261	2.342			29.14	2.445	1.482
29.16	2.269	2.368			29.16	2.442	1.401
29.18	2.294	2.263			29.18	2.379	1.352
29.19	2.248	2.256			29.19	2.357	1.377
29.2	2.248	2.233			29.2	2.399	1.419
29.22	2.266	2.367			29.22	2.381	1.47
29.23	2.312	2.464			29.23	2.372	1.261
29.25	2.258	2.51			29.25	2.401	1.527
29.27	2.31	2.301			29.27	2.449	1.397
29.28	2.259	2.424			29.28	2.493	1.464
29.3	2.245	2.405			29.3	2.475	1.497
29.31	2.29	2.386			29.31	2.46	1.527
29.32	2.249	2.433			29.32	2.497	1.575
29.34	2.293	2.456			29.34	2.511	1.363
29.36	2.226	2.34			29.36	2.531	1.397
29.37	2.23	2.424			29.37	2.546	1.501
29.39	2.183	2.434			29.39	2.62	1.332
29.4	2.254	2.599			29.4	2.593	1.527
29.41	2.212	2.449			29.41	2.586	1.401
29.43	2.259	2.414			29.43	2.431	1.312
29.45	2.311	2.472			29.45	2.451	1.397
29.46	2.285	2.368			29.46	2.433	1.444
29.48	2.228	2.528			29.48	2.558	1.372
29.49	2.326	2.351			29.49	2.437	1.418
29.5	2.264	2.34			29.5	2.453	1.335
29.52	2.317	2.452			29.52	2.433	1.382
29.54	2.271	2.27			29.54	2.466	1.404
29.55	2.3	2.323			29.55	2.373	1.323
29.57	2.319	2.303			29.57	2.423	1.347
29.58	2.238	2.373			29.58	2.422	1.301
29.59	2.258	2.393			29.59	2.496	1.306
29.61	2.29	2.454			29.61	2.475	1.273
29.62	2.238	2.567			29.62	2.437	1.304
29.64	2.191	2.467			29.64	2.494	1.311
29.66	2.228	2.338			29.66	2.429	1.24
29.67	2.211	2.424			29.67	2.363	1.227
29.68	2.241	2.414			29.68	2.437	1.225
29.7	2.258	2.525			29.7	2.455	1.329
29.71	2.222	2.306			29.71	2.484	1.281
29.73	2.216	2.444			29.73	2.498	1.21
29.75	2.258	2.379			29.75	2.494	1.25
29.76	2.24	2.408			29.76	2.447	1.191
29.77	2.247	2.36			29.77	2.445	1.29
29.79	2.228	2.506			29.79	2.497	1.343
29.8	2.29	2.327			29.8	2.549	1.367
29.82	2.228	2.388			29.82	2.519	1.31
29.84	2.209	2.385			29.84	2.469	1.425
29.85	2.299	2.309			29.85	2.465	1.327
29.86	2.263	2.316			29.86	2.432	1.379
29.88	2.231	2.278			29.88	2.464	1.394
29.89	2.247	2.452			29.89	2.456	1.351
29.91	2.217	2.435			29.91	2.47	1.251
29.93	2.217	2.279			29.93	2.507	1.205
29.94	2.2	2.354			29.94	2.456	1.343
29.95	2.238	2.42			29.95	2.491	1.444
[truncated: 27,972 more rows]

## Sheet: Panel D - Gating charge dists
KCNQ1-KCNE1 Resting/Closed Model					KCNQ1-KCNE1 Activated/Open Model
S4 Residue	S2/S3 Residue	Mean distance (Ang.)			S4 Residue	S2/S3 Residue	Mean distance (Ang.)
R228	E160	3.89105			R228	E160	16.7277
R228	E170	13.9097			R228	E170	30.0708
R228	D202	13.3352			R228	D202	27.042
R231	E160	12.3702			R231	E160	6.03653
R231	E170	4.65773			R231	E170	20.2216
R231	D202	6.1182			R231	D202	18.194
Q234	E160	15.1805			Q234	E160	4.6027
Q234	E170	7.73498			Q234	E170	15.7694
Q234	D202	4.88743			Q234	D202	13.5567
R237	E160	21.4869			R237	E160	4.22768
R237	E170	12.3749			R237	E170	11.1928
R237	D202	8.29925			R237	D202	9.6854
H240	E160	25.7019			H240	E160	12.6286
H240	E170	18.6786			H240	E170	5.83692
H240	D202	16.0622			H240	D202	4.15487
R243	E160	32.1115			R243	E160	16.1626
R243	E170	22.2597			R243	E170	3.5297
R243	D202	22.6318			R243	D202	7.0727

## Sheet: Panel E - Pore radius
KCNQ1-KCNE1 Resting/Closed Model					KCNQ1-KCNE1 Activated/Open Model
Pore radius (Ang.)					Pore radius (Ang.)
Z-coordinate (Ang.)	Mean	STD			Z-coordinate (Ang.)	Mean	STD
-35	6.19279	1.71566			-30	7.98008	0.4203
-34.875	6.08051	1.51131			-29.875	7.91463	0.42227
-34.75	5.99305	1.37488			-29.75	7.85097	0.42297
-34.625	5.91123	1.27713			-29.625	7.78731	0.42414
-34.5	5.84149	1.20935			-29.5	7.72594	0.42404
-34.375	5.76803	1.16799			-29.375	7.66423	0.42385
-34.25	5.7079	1.13422			-29.25	7.60431	0.42333
-34.125	5.64062	1.09924			-29.125	7.54285	0.42242
-34	5.58712	1.0755			-29	7.48381	0.42162
-33.875	5.52242	1.03913			-28.875	7.42303	0.4215
-33.75	5.4691	1.01655			-28.75	7.36465	0.41906
-33.625	5.41237	1.00193			-28.625	7.30324	0.41852
-33.5	5.36708	0.99137			-28.5	7.24524	0.4163
-33.375	5.3153	0.98598			-28.375	7.18536	0.41396
-33.25	5.27341	0.9764			-28.25	7.12819	0.41226
-33.125	5.22497	0.96806			-28.125	7.06659	0.41069
-33	5.1841	0.95669			-28	7.00839	0.41018
-32.875	5.1404	0.94646			-27.875	6.94879	0.40865
-32.75	5.10073	0.93737			-27.75	6.89195	0.4063
-32.625	5.05525	0.92896			-27.625	6.83061	0.40853
-32.5	5.01659	0.91929			-27.5	6.77391	0.40641
-32.375	4.97239	0.90873			-27.375	6.71516	0.40394
-32.25	4.93484	0.89998			-27.25	6.65894	0.40169
-32.125	4.89283	0.89318			-27.125	6.59725	0.40221
-32	4.85582	0.88638			-27	6.5401	0.39947
-31.875	4.81531	0.88019			-26.875	6.48194	0.39646
-31.75	4.78277	0.86995			-26.75	6.4262	0.3937
-31.625	4.74218	0.8592			-26.625	6.36562	0.39183
-31.5	4.71046	0.84991			-26.5	6.30758	0.39084
-31.375	4.67092	0.83305			-26.375	6.24447	0.39232
-31.25	4.63694	0.82309			-26.25	6.1845	0.39134
-31.125	4.59188	0.8202			-26.125	6.11443	0.40272
-31	4.55958	0.81394			-26	6.05229	0.40673
-30.875	4.5186	0.81123			-25.875	5.98861	0.40607
-30.75	4.49059	0.79971			-25.75	5.92711	0.40403
-30.625	4.454	0.79115			-25.625	5.86102	0.40225
-30.5	4.42688	0.77666			-25.5	5.7981	0.40241
-30.375	4.39046	0.76699			-25.375	5.72628	0.40701
-30.25	4.36196	0.75132			-25.25	5.6611	0.4094
-30.125	4.32197	0.73549			-25.125	5.59068	0.41096
-30	4.29194	0.72055			-25	5.52697	0.41113
-29.875	4.24772	0.7021			-24.875	5.45823	0.40841
-29.75	4.22009	0.68079			-24.75	5.39238	0.40809
-29.625	4.17751	0.65645			-24.625	5.31955	0.40947
-29.5	4.14405	0.63429			-24.5	5.25282	0.40749
-29.375	4.09023	0.6201			-24.375	5.17764	0.40827
-29.25	4.05461	0.59694			-24.25	5.10963	0.40898
-29.125	4.00524	0.57335			-24.125	5.03092	0.40796
-29	3.96556	0.54973			-24	4.96195	0.40723
-28.875	3.90803	0.5305			-23.875	4.89111	0.40475
-28.75	3.8647	0.50884			-23.75	4.82421	0.40129
-28.625	3.79956	0.48642			-23.625	4.75344	0.39533
-28.5	3.75226	0.46224			-23.5	4.68568	0.39046
-28.375	3.68336	0.44163			-23.375	4.61425	0.38323
-28.25	3.63223	0.4163			-23.25	4.5474	0.37709
-28.125	3.56081	0.39735			-23.125	4.4698	0.37303
-28	3.50027	0.37605			-23	4.40502	0.36957
-27.875	3.41977	0.35599			-22.875	4.33479	0.36406
-27.75	3.35302	0.33829			-22.75	4.27049	0.35882
-27.625	3.26666	0.32136			-22.625	4.20023	0.35464
-27.5	3.19095	0.30548			-22.5	4.13915	0.34833
-27.375	3.10014	0.29348			-22.375	4.07591	0.34352
-27.25	3.02475	0.28083			-22.25	4.01542	0.33887
-27.125	2.93042	0.2724			-22.125	3.95208	0.3334
-27	2.85142	0.26062			-22	3.8943	0.32941
-26.875	2.75437	0.25578			-21.875	3.83604	0.32462
-26.75	2.67427	0.24883			-21.75	3.77995	0.3206
-26.625	2.57786	0.24353			-21.625	3.7223	0.31873
-26.5	2.49556	0.23625			-21.5	3.67088	0.31483
-26.375	2.39665	0.23401			-21.375	3.61767	0.31036
-26.25	2.31285	0.22591			-21.25	3.56834	0.30671
-26.125	2.21766	0.22011			-21.125	3.5175	0.30598
-26	2.13334	0.21597			-21	3.47294	0.30366
-25.875	2.03525	0.21854			-20.875	3.42575	0.30314
-25.75	1.9537	0.20977			-20.75	3.38536	0.30247
-25.625	1.857	0.21088			-20.625	3.34232	0.30288
-25.5	1.77887	0.20272			-20.5	3.30585	0.30212
-25.375	1.69077	0.19693			-20.375	3.26621	0.30347
-25.25	1.6131	0.19254			-20.25	3.23234	0.30499
-25.125	1.52675	0.19374			-20.125	3.19719	0.30972
-25	1.45744	0.18243			-20	3.16839	0.3109
-24.875	1.37423	0.17994			-19.875	3.13828	0.31426
-24.75	1.31005	0.17231			-19.75	3.11183	0.31796
-24.625	1.241	0.17361			-19.625	3.08409	0.32237
-24.5	1.18115	0.16821			-19.5	3.06045	0.32696
-24.375	1.11776	0.16723			-19.375	3.03214	0.33618
-24.25	1.06576	0.16331			-19.25	3.01205	0.34003
-24.125	1.01348	0.1626			-19.125	2.98783	0.34594
-24	0.96839	0.16228			-19	2.96863	0.35216
-23.875	0.92466	0.16521			-18.875	2.94208	0.36207
-23.75	0.89034	0.16562			-18.75	2.92373	0.36691
-23.625	0.85588	0.17114			-18.625	2.89684	0.38103
-23.5	0.83249	0.17309			-18.5	2.88135	0.38335
-23.375	0.80889	0.18089			-18.375	2.86045	0.38824
-23.25	0.79653	0.1844			-18.25	2.84397	0.39377
-23.125	0.78411	0.19221			-18.125	2.81855	0.40259
-23	0.78207	0.19795			-18	2.80386	0.40757
-22.875	0.77789	0.2096			-17.875	2.78068	0.4121
-22.75	0.78821	0.21193			-17.75	2.76683	0.4129
-22.625	0.7966	0.22337			-17.625	2.74811	0.41421
-22.5	0.82011	0.22497			-17.5	2.73459	0.4149
-22.375	0.8372	0.22801			-17.375	2.71498	0.41312
-22.25	0.87149	0.23229			-17.25	2.70084	0.41162
-22.125	0.90276	0.23879			-17.125	2.67635	0.41504
-22	0.9455	0.24258			-17	2.6627	0.40768
-21.875	0.98629	0.24846			-16.875	2.63899	0.4054
-21.75	1.03619	0.25117			-16.75	2.62397	0.39855
-21.625	1.08373	0.25819			-16.625	2.59786	0.39803
-21.5	1.14152	0.26036			-16.5	2.58104	0.39089
-21.375	1.19451	0.26656			-16.375	2.5575	0.38206
-21.25	1.25616	0.26527			-16.25	2.53951	0.37588
-21.125	1.31286	0.26626			-16.125	2.51265	0.3654
-21	1.37742	0.26517			-16	2.49137	0.3557
-20.875	1.43282	0.26562			-15.875	2.46042	0.3476
-20.75	1.50041	0.26225			-15.75	2.44096	0.33919
-20.625	1.55311	0.26162			-15.625	2.41202	0.337
-20.5	1.61999	0.25862			-15.5	2.39393	0.32824
-20.375	1.66739	0.2588			-15.375	2.36775	0.32416
-20.25	1.72741	0.25132			-15.25	2.35261	0.31856
-20.125	1.76134	0.25257			-15.125	2.33095	0.31425
-20	1.80716	0.246			-15	2.31686	0.3118
-19.875	1.82414	0.23629			-14.875	2.29846	0.30993
-19.75	1.85347	0.23232			-14.75	2.28969	0.3091
-19.625	1.84497	0.22828			-14.625	2.27679	0.31114
-19.5	1.85183	0.22798			-14.5	2.27167	0.31036
-19.375	1.82297	0.22736			-14.375	2.26111	0.31036
-19.25	1.80741	0.23343			-14.25	2.25974	0.30851
-19.125	1.75581	0.24034			-14.125	2.25196	0.30662
-19	1.72019	0.24717			-14	2.25122	0.30534
-18.875	1.65584	0.25258			-13.875	2.24712	0.30467
-18.75	1.6027	0.25791			-13.75	2.25088	0.30228
-18.625	1.53069	0.26606			-13.625	2.24969	0.30156
-18.5	1.47248	0.2645			-13.5	2.25495	0.29769
-18.375	1.40222	0.26788			-13.375	2.25593	0.29503
-18.25	1.34158	0.26448			-13.25	2.26268	0.29257
-18.125	1.27614	0.26395			-13.125	2.26062	0.29342
-18	1.2193	0.25766			-13	2.26634	0.2962
-17.875	1.15718	0.25831			-12.875	2.25921	0.3006
-17.75	1.10519	0.25313			-12.75	2.2627	0.2938
-17.625	1.04625	0.25839			-12.625	2.25595	0.28898
-17.5	1.00064	0.25021			-12.5	2.25757	0.28614
-17.375	0.95269	0.24615			-12.375	2.25217	0.28472
-17.25	0.9135	0.23835			-12.25	2.2519	0.28309
-17.125	0.87182	0.23459			-12.125	2.24388	0.28456
-17	0.83923	0.22983			-12	2.245	0.28566
-16.875	0.80318	0.22972			-11.875	2.2398	0.28675
-16.75	0.77934	0.22292			-11.75	2.24237	0.28789
-16.625	0.74859	0.22379			-11.625	2.23573	0.29173
-16.5	0.73177	0.21421			-11.5	2.23878	0.28997
-16.375	0.7113	0.2065			-11.375	2.23597	0.29051
-16.25	0.70102	0.1987			-11.25	2.23886	0.29162
-16.125	0.68741	0.19812			-11.125	2.23627	0.29233
-16	0.6886	0.18812			-11	2.2405	0.292
-15.875	0.68487	0.18703			-10.875	2.23838	0.29041
-15.75	0.69611	0.18078			-10.75	2.24511	0.29139
-15.625	0.70318	0.18385			-10.625	2.24166	0.28779
-15.5	0.72606	0.1796			-10.5	2.24741	0.28813
-15.375	0.74477	0.18204			-10.375	2.2437	0.28524
-15.25	0.77782	0.18122			-10.25	2.24678	0.28444
-15.125	0.80299	0.19345			-10.125	2.24406	0.28303
-15	0.8496	0.18823			-10	2.24753	0.28209
-14.875	0.88554	0.19847			-9.875	2.24329	0.28097
-14.75	0.93958	0.19752			-9.75	2.24756	0.28046
-14.625	0.9897	0.20197			-9.625	2.23925	0.28034
-14.5	1.04973	0.20511			-9.5	2.24454	0.28086
-14.375	1.10629	0.20853			-9.375	2.24212	0.28214
-14.25	1.17366	0.21044			-9.25	2.24762	0.28226
-14.125	1.23388	0.21232			-9.125	2.24725	0.28623
-14	1.30565	0.21184			-9	2.25695	0.28632
-13.875	1.36718	0.21306			-8.875	2.26001	0.28821
-13.75	1.44281	0.20876			-8.75	2.27287	0.29136
-13.625	1.50874	0.20363			-8.625	2.27797	0.29609
-13.5	1.58448	0.19916			-8.5	2.29473	0.30006
-13.375	1.64627	0.19456			-8.375	2.30119	0.30813
-13.25	1.71977	0.18928			-8.25	2.31935	0.31282
-13.125	1.77843	0.1851			-8.125	2.32535	0.32139
-13	1.84689	0.18002			-8	2.34511	0.32704
-12.875	1.8959	0.17551			-7.875	2.35115	0.34046
-12.75	1.95509	0.17122			-7.75	2.37129	0.349
-12.625	1.99237	0.16265			-7.625	2.37803	0.36204
-12.5	2.03961	0.15776			-7.5	2.39706	0.36817
-12.375	2.05961	0.15322			-7.375	2.40286	0.37421
-12.25	2.08949	0.15393			-7.25	2.42081	0.38066
-12.125	2.09543	0.15607			-7.125	2.42394	0.38459
-12	2.11087	0.16368			-7	2.43969	0.38934
-11.875	2.10984	0.16967			-6.875	2.44574	0.39171
-11.75	2.11711	0.17905			-6.75	2.46122	0.39581
-11.625	2.1135	0.18274			-6.625	2.46124	0.40673
-11.5	2.11586	0.1891			-6.5	2.47675	0.40926
-11.375	2.11168	0.19007			-6.375	2.47642	0.40983
-11.25	2.1141	0.19059			-6.25	2.48871	0.41119
-11.125	2.11471	0.18859			-6.125	2.48353	0.41125
-11	2.12112	0.18605			-6	2.48835	0.41235
-10.875	2.12879	0.1821			-5.875	2.4718	0.41655
-10.75	2.14127	0.17795			-5.75	2.47037	0.41142
-10.625	2.15599	0.17387			-5.625	2.44541	0.41483
-10.5	2.17573	0.16922			-5.5	2.43759	0.40878
-10.375	2.19882	0.16523			-5.375	2.41504	0.39922
-10.25	2.22556	0.16162			-5.25	2.39934	0.39064
-10.125	2.2554	0.15825			-5.125	2.37695	0.3833
-10	2.28897	0.15524			-5	2.36351	0.37323
-9.875	2.32495	0.15241			-4.875	2.34717	0.36484
-9.75	2.36488	0.14994			-4.75	2.33932	0.35695
-9.625	2.4063	0.14916			-4.625	2.32894	0.3515
-9.5	2.45237	0.1465			-4.5	2.3264	0.3465
-9.375	2.49816	0.14642			-4.375	2.31959	0.34542
-9.25	2.5479	0.14546			-4.25	2.32257	0.3409
-9.125	2.59786	0.14566			-4.125	2.32124	0.34323
-9	2.651	0.14656			-4	2.32875	0.34298
-8.875	2.70497	0.14811			-3.875	2.33174	0.33976
-8.75	2.76201	0.14974			-3.75	2.34327	0.3361
-8.625	2.81889	0.15175			-3.625	2.34598	0.32525
-8.5	2.87907	0.15431			-3.5	2.35556	0.31653
-8.375	2.93638	0.15725			-3.375	2.34709	0.30699
-8.25	2.99742	0.1601			-3.25	2.3491	0.30018
-8.125	3.05213	0.1625			-3.125	2.3249	0.2856
-8	3.11007	0.16701			-3	2.31203	0.27552
-7.875	3.15898	0.17136			-2.875	2.2586	0.26286
-7.75	3.21131	0.1777			-2.75	2.22903	0.25024
-7.625	3.25024	0.18271			-2.625	2.15453	0.24225
-7.5	3.29254	0.1905			-2.5	2.11648	0.23152
-7.375	3.31894	0.19733			-2.375	2.0222	0.24502
-7.25	3.34956	0.20612			-2.25	1.98152	0.2359
-7.125	3.36647	0.21333			-2.125	1.88756	0.25173
-7	3.38786	0.22335			-2	1.84739	0.24304
-6.875	3.3957	0.23327			-1.875	1.7759	0.24431
-6.75	3.40824	0.24514			-1.75	1.73649	0.23429
-6.625	3.40607	0.25316			-1.625	1.67328	0.2299
-6.5	3.40853	0.26258			-1.5	1.6377	0.21684
-6.375	3.39848	0.26614			-1.375	1.58088	0.21425
-6.25	3.39174	0.27168			-1.25	1.54995	0.2023
-6.125	3.37591	0.27334			-1.125	1.50521	0.2004
-6	3.36392	0.27569			-1	1.47987	0.18764
-5.875	3.34886	0.27514			-0.875	1.44164	0.18134
-5.75	3.33722	0.27456			-0.75	1.41473	0.17228
-5.625	3.32386	0.27298			-0.625	1.37744	0.16312
-5.5	3.31335	0.27178			-0.5	1.34881	0.15426
-5.375	3.30245	0.27065			-0.375	1.30858	0.14647
-5.25	3.29483	0.2694			-0.25	1.27459	0.14055
-5.125	3.28748	0.26887			-0.125	1.23403	0.13639
-5	3.2832	0.26803			0	1.20003	0.13533
-4.875	3.28008	0.26703			0.125	1.16628	0.1216
-4.75	3.2795	0.26641			0.25	1.1387	0.11056
-4.625	3.28142	0.26571			0.375	1.11027	0.10735
-4.5	3.28605	0.26516			0.5	1.08897	0.09497
-4.375	3.29215	0.26514			0.625	1.07077	0.09294
-4.25	3.30128	0.26513			0.75	1.06152	0.07628
-4.125	3.31201	0.26533			0.875	1.05477	0.07501
-4	3.32588	0.26487			1	1.05345	0.07607
-3.875	3.34117	0.26401			1.125	1.05726	0.07904
-3.75	3.35929	0.26292			1.25	1.06642	0.08333
-3.625	3.37899	0.26119			1.375	1.08057	0.08752
-3.5	3.40114	0.25968			1.5	1.1	0.09258
-3.375	3.42439	0.25879			1.625	1.11919	0.09211
-3.25	3.45154	0.2559			1.75	1.14269	0.09293
-3.125	3.47878	0.25415			1.875	1.14939	0.08364
-3	3.50959	0.25102			2	1.15896	0.08468
-2.875	3.54143	0.24895			2.125	1.13515	0.08628
-2.75	3.5761	0.24715			2.25	1.11256	0.09903
-2.625	3.60977	0.24315			2.375	1.06277	0.10609
-2.5	3.64611	0.23988			2.5	1.01909	0.11459
-2.375	3.67614	0.22783			2.625	0.9614	0.11746
-2.25	3.7086	0.21827			2.75	0.90852	0.12191
-2.125	3.71874	0.19647			2.875	0.85409	0.11593
-2	3.73285	0.18256			3	0.80503	0.11018
-1.875	3.70399	0.16479			3.125	0.76061	0.10202
-1.75	3.67984	0.15976			3.25	0.72189	0.09389
-1.625	3.609	0.15469			3.375	0.68924	0.08503
-1.5	3.54365	0.15681			3.5	0.66267	0.07649
-1.375	3.45108	0.1537			3.625	0.64285	0.06874
-1.25	3.36283	0.15385			3.75	0.62964	0.06228
-1.125	3.26201	0.15202			3.875	0.62353	0.05788
-1	3.16332	0.1516			4	0.62422	0.05593
-0.875	3.06026	0.15167			4.125	0.63173	0.05675
-0.75	2.96003	0.14878			4.25	0.64596	0.06021
-0.625	2.85802	0.14609			4.375	0.66694	0.06559
-0.5	2.75804	0.14404			4.5	0.69434	0.07238
-0.375	2.6583	0.14191			4.625	0.72796	0.08021
-0.25	2.56022	0.1403			4.75	0.7674	0.0885
-0.125	2.4623	0.13957			4.875	0.81242	0.09672
0	2.36681	0.13759			5	0.86272	0.10487
0.125	2.2727	0.13455			5.125	0.91261	0.10396
0.25	2.18127	0.13099			5.25	0.9653	0.10216
0.375	2.09068	0.12813			5.375	0.99431	0.08227
0.5	2.00205	0.12492			5.5	1.02393	0.08001
0.625	1.91558	0.12193			5.625	1.00645	0.07265
0.75	1.8313	0.11854			5.75	0.98935	0.09263
0.875	1.74973	0.11518			5.875	0.94138	0.0985
1	1.671	0.11142			6	0.89628	0.1099
1.125	1.59475	0.10799			6.125	0.84298	0.10715
1.25	1.52165	0.10393			6.25	0.79458	0.10514
1.375	1.45181	0.09995			6.375	0.74913	0.0979
1.5	1.38557	0.09559			6.5	0.70912	0.08953
1.625	1.32297	0.09137			6.625	0.67505	0.08063
1.75	1.26468	0.08692			6.75	0.64748	0.07197
1.875	1.21038	0.08252			6.875	0.62626	0.06443
2	1.16081	0.07806			7	0.61171	0.05839
2.125	1.11597	0.07375			7.125	0.60412	0.0545
2.25	1.07584	0.06968			7.25	0.60321	0.05356
2.375	1.041	0.06609			7.375	0.60919	0.0556
2.5	1.01133	0.06301			7.5	0.62206	0.0602
2.625	0.9873	0.06076			7.625	0.64184	0.06701
2.75	0.96881	0.05932			7.75	0.66815	0.07507
2.875	0.95617	0.0588			7.875	0.70082	0.08379
3	0.94916	0.05954			8	0.73954	0.0928
3.125	0.94822	0.06122			8.125	0.78381	0.10116
3.25	0.95296	0.06405			8.25	0.83352	0.10946
3.375	0.96382	0.06776			8.375	0.88172	0.10778
3.5	0.98017	0.07215			8.5	0.93316	0.10592
3.625	1.0021	0.07606			8.625	0.96039	0.0853
3.75	1.02922	0.08033			8.75	0.98786	0.07987
3.875	1.05585	0.07712			8.875	0.97247	0.06831
4	1.08702	0.07532			9	0.95777	0.08271
4.125	1.09772	0.06105			9.125	0.91708	0.08778
4.25	1.1107	0.06122			9.25	0.87988	0.09994
4.375	1.08345	0.06498			9.375	0.83531	0.09831
4.5	1.05663	0.08399			9.5	0.79552	0.09721
4.625	0.99942	0.09085			9.625	0.75828	0.08927
4.75	0.94634	0.10119			9.75	0.72708	0.08151
4.875	0.88706	0.09966			9.875	0.70202	0.07394
5	0.83264	0.09818			10	0.68331	0.06732
5.125	0.78128	0.09224			10.125	0.67125	0.06222
5.25	0.73532	0.08621			10.25	0.66561	0.05916
5.375	0.69535	0.07972			10.375	0.66677	0.05879
5.5	0.66132	0.07335			10.5	0.67468	0.06093
5.625	0.63392	0.06759			10.625	0.68932	0.06533
5.75	0.61313	0.06229			10.75	0.71041	0.07155
5.875	0.59927	0.05812			10.875	0.73796	0.07878
6	0.59213	0.05538			11	0.77147	0.08682
6.125	0.59213	0.05424			11.125	0.81109	0.09491
6.25	0.599	0.0548			11.25	0.85627	0.10314
6.375	0.61283	0.05701			11.375	0.90583	0.10873
6.5	0.63314	0.06046			11.5	0.96054	0.11482
6.625	0.65999	0.06489			11.625	1.01296	0.11259
6.75	0.69309	0.07003			11.75	1.06999	0.11142
6.875	0.73238	0.07558			11.875	1.10765	0.09589
7	0.77742	0.08128			12	1.14927	0.08807
7.125	0.82737	0.08573			12.125	1.15383	0.07244
7.25	0.88237	0.09009			12.25	1.16151	0.07438
7.375	0.93537	0.08471			12.375	1.13697	0.07299
7.5	0.99129	0.08183			12.5	1.11681	0.0812
7.625	1.01322	0.06225			12.625	1.08589	0.07864
7.75	1.0285	0.0632			12.75	1.06032	0.07892
7.875	0.99397	0.06735			12.875	1.03612	0.07433
8	0.95868	0.08592			13	1.01731	0.07112
8.125	0.90421	0.08617			13.125	1.00282	0.0673
8.25	0.85345	0.08546			13.25	0.99398	0.06534
8.375	0.80499	0.07946			13.375	0.99083	0.06521
8.5	0.76193	0.07346			13.5	0.99363	0.06752
8.625	0.7248	0.06773			13.625	1.00199	0.07177
8.75	0.69374	0.0623			13.75	1.01616	0.07773
8.875	0.66904	0.0576			13.875	1.03587	0.08492
9	0.65083	0.05398			14	1.0614	0.09276
9.125	0.63943	0.05185			14.125	1.09182	0.10104
9.25	0.63457	0.05136			14.25	1.12759	0.10962
9.375	0.63671	0.05272			14.375	1.16788	0.11751
9.5	0.64556	0.0557			14.5	1.21311	0.12559
9.625	0.66126	0.06013			14.625	1.26202	0.1321
9.75	0.68346	0.06535			14.75	1.3157	0.13881
9.875	0.71212	0.07111			14.875	1.3714	0.14371
10	0.74682	0.07709			15	1.43128	0.14862
10.125	0.7873	0.08301			15.125	1.48889	0.1515
10.25	0.83335	0.08878			15.25	1.5513	0.15491
10.375	0.88139	0.08807			15.375	1.6086	0.15676
10.5	0.93455	0.08814			15.5	1.67115	0.16113
10.625	0.97165	0.07015			15.625	1.72622	0.16439
10.75	1.01154	0.06341			15.75	1.78676	0.17009
10.875	1.00584	0.05481			15.875	1.83446	0.17512
11	0.99906	0.07473			16	1.89201	0.17765
11.125	0.95363	0.07999			16.125	1.93232	0.18073
11.25	0.91109	0.08914			16.25	1.9819	0.18492
11.375	0.86299	0.0864			16.375	2.01442	0.18795
11.5	0.81983	0.08226			16.5	2.05848	0.19119
11.625	0.78135	0.07682			16.625	2.08342	0.19584
11.75	0.74882	0.07119			16.75	2.11834	0.20418
11.875	0.72241	0.06613			16.875	2.13606	0.21714
12	0.70239	0.06161			17	2.17068	0.22068
12.125	0.68903	0.05841			17.125	2.18861	0.23198
12.25	0.68219	0.05656			17.25	2.22165	0.23793
12.375	0.68217	0.05605			17.375	2.23748	0.24864
12.5	0.68856	0.05718			17.5	2.26837	0.25456
12.625	0.70172	0.05981			17.625	2.28373	0.26595
12.75	0.72129	0.06371			17.75	2.31795	0.27518
12.875	0.74727	0.06876			17.875	2.33585	0.28686
13	0.7796	0.07396			18	2.3863	0.30008
13.125	0.81787	0.07972			18.125	2.41231	0.31573
13.25	0.86183	0.08553			18.25	2.46965	0.32926
13.375	0.91092	0.0902			18.375	2.49966	0.34707
13.5	0.96512	0.09494			18.5	2.55151	0.36708
13.625	1.02014	0.09484			18.625	2.58096	0.38051
13.75	1.07966	0.09571			18.75	2.63583	0.40316
13.875	1.12454	0.08397			18.875	2.66555	0.41787
14	1.17146	0.07562			19	2.72583	0.41289
14.125	1.17377	0.06205			19.125	2.75698	0.41844
14.25	1.17796	0.06743			19.25	2.82277	0.42026
14.375	1.14631	0.06803			19.375	2.85553	0.42579
14.5	1.11991	0.07573			19.5	2.90476	0.4293
14.625	1.08292	0.07385			19.625	2.93274	0.43485
14.75	1.05131	0.07304			19.75	2.99049	0.43287
14.875	1.02265	0.06907			19.875	3.02312	0.43466
15	0.99941	0.06562			20	3.07707	0.42405
15.125	0.98171	0.06271			20.125	3.11224	0.42892
15.25	0.96945	0.06095			20.25	3.16281	0.42723
15.375	0.96306	0.06031			20.375	3.19976	0.43309
15.5	0.96246	0.06086			20.5	3.25174	0.43428
15.625	0.96748	0.06222			20.625	3.29065	0.43872
15.75	0.97819	0.06455			20.75	3.3406	0.444
15.875	0.99459	0.06751			20.875	3.38335	0.44859
16	1.01684	0.07111			21	3.43692	0.45509
16.125	1.04457	0.07512			21.125	3.48004	0.45993
16.25	1.07758	0.07947			21.25	3.53546	0.46228
16.375	1.11577	0.0839			21.375	3.5819	0.46714
16.5	1.15895	0.0884			21.5	3.64052	0.46257
16.625	1.20678	0.09276			21.625	3.68975	0.4634
16.75	1.25925	0.09716			21.75	3.74697	0.46363
16.875	1.3151	0.10116			21.875	3.79575	0.46407
17	1.37531	0.10496			22	3.85299	0.46255
17.125	1.4383	0.10771			22.125	3.90345	0.45993
17.25	1.50529	0.11053			22.25	3.96114	0.4559
17.375	1.57433	0.1129			22.375	4.01015	0.45283
17.5	1.64677	0.11511			22.5	4.07018	0.44105
17.625	1.72072	0.11735			22.625	4.1232	0.43486
17.75	1.7975	0.11999			22.75	4.18146	0.4307
17.875	1.87459	0.12185			22.875	4.23506	0.42653
18	1.95461	0.12408			23	4.29604	0.41815
18.125	2.03378	0.12475			23.125	4.35179	0.4128
18.25	2.11583	0.12672			23.25	4.41878	0.40037
18.375	2.19502	0.12638			23.375	4.47875	0.39293
18.5	2.27689	0.12784			23.5	4.54576	0.38197
18.625	2.35383	0.12757			23.625	4.60781	0.37655
18.75	2.43437	0.12884			23.75	4.67464	0.37073
18.875	2.50682	0.1306			23.875	4.73986	0.36616
19	2.58318	0.13502			24	4.80874	0.36076
19.125	2.64926	0.14047			24.125	4.87596	0.35622
19.25	2.72044	0.14577			24.25	4.9486	0.35001
19.375	2.7803	0.15386			24.375	5.01813	0.34736
19.5	2.84601	0.16215			24.5	5.0928	0.34242
19.625	2.90092	0.17093			24.625	5.1638	0.34112
19.75	2.9603	0.18012			24.75	5.2401	0.33764
19.875	3.01229	0.18811			24.875	5.31209	0.33527
20	3.0702	0.19416			25	5.38964	0.32974
20.125	3.12202	0.1994
20.25	3.17791	0.20481
20.375	3.23018	0.20812
20.5	3.28643	0.21146
20.625	3.34072	0.2139
20.75	3.39859	0.21569
20.875	3.45665	0.21751
21	3.51848	0.21743
21.125	3.58029	0.21846
21.25	3.64497	0.2176
21.375	3.71126	0.2178
21.5	3.77919	0.21812
21.625	3.84911	0.2181
21.75	3.92143	0.21758
21.875	3.99486	0.21761
22	4.07034	0.21745
22.125	4.14684	0.21796
22.25	4.22578	0.21566
22.375	4.30579	0.21528
22.5	4.38692	0.21495
22.625	4.46949	0.21439
22.75	4.55309	0.21403
22.875	4.63797	0.21391
23	4.72518	0.21243
23.125	4.81222	0.2123
23.25	4.90097	0.21182
23.375	4.98913	0.21161
23.5	5.07924	0.21095
23.625	5.16818	0.21021
23.75	5.259	0.20947
23.875	5.34847	0.20895
24	5.44073	0.20675
24.125	5.53054	0.20548
24.25	5.62207	0.20376
24.375	5.70917	0.20169
24.5	5.79791	0.2011
24.625	5.88164	0.20007
24.75	5.96734	0.20028
24.875	6.04486	0.20148
25	6.12611	0.20476
25.125	6.19724	0.20864
25.25	6.27139	0.21586
25.375	6.33431	0.22509
25.5	6.39965	0.23874
25.625	6.45032	0.25288
25.75	6.50497	0.26986
25.875	6.54154	0.28464
26	6.5804	0.30352
26.125	6.60548	0.31944
26.25	6.63327	0.33826
26.375	6.64741	0.34887
26.5	6.66392	0.36134
26.625	6.67152	0.36969
26.75	6.68339	0.37272
26.875	6.6904	0.37628
27	6.69969	0.38012
27.125	6.70726	0.38261
27.25	6.71671	0.3855
27.375	6.72575	0.38634
27.5	6.73699	0.38758
27.625	6.74782	0.38761
27.75	6.76103	0.38744
27.875	6.77476	0.38774
28	6.79065	0.38815
28.125	6.80702	0.38841
28.25	6.82568	0.38783
28.375	6.84469	0.38777
28.5	6.86548	0.38784
28.625	6.8874	0.38787
28.75	6.91112	0.38814
28.875	6.93554	0.38833
29	6.96216	0.38788
29.125	6.98883	0.38848
29.25	7.01821	0.38769
29.375	7.04747	0.38835
29.5	7.07926	0.3875
29.625	7.11131	0.38741
29.75	7.14506	0.38721
29.875	7.17909	0.3874
30	7.21539	0.38678
