# Supplementary material for: Allosteric mechanism for KCNE1 modulation of KCNQ1 potassium channel activation
Source: eLife. 2020 Oct 23;9:e57680. doi: 10.7554/eLife.57680 (PMC7584456; doi:10.7554/eLife.57680)
Supplement: Figure 5—source data 1. [file elife-57680-fig5-data1.xlsx]

## Sheet: Panels A+B - MD contact numbers
KCNQ1-KCNE1 Resting/Closed Model												KCNQ1-KCNE1 Activated/Open Model
KCNQ1-KCNE1 Pairwise Residue Heteroatom Contacts						Total KCNE1 Residue Contacts						KCNQ1-KCNE1 Pairwise Residue Heteroatom Contacts						Total KCNE1 Residue Contacts
KCNE1 residue	KCNQ1 residue	Mean	STD			KCNE1 residue	Mean	STD				KCNE1 residue	KCNQ1 residue	Mean	STD			KCNE1 residue	Mean	STD
37	292	0.026	0.01535			37	9.266	4.314				37	292	0.00022	0.0003			37	11.267	3.132
37	220	0.08578	0.11437			38	5.498	2.788				37	300	0.01567	0.01503			38	3.697	0.898
37	146	0.64233	0.40324			39	9.749	3.728				37	146	0.377	0.1865			39	4.852	1.504
37	288	0.43811	0.27722			40	5.143	1.282				37	288	0.02089	0.01584			40	7.312	1.308
37	296	0.00256	0.00297			41	16.81	2.76				37	296	0.28633	0.28918			41	8.359	1.504
37	318	0.08278	0.07565			42	10.702	2.529				37	326	0.078	0.03978			42	3.014	1.435
37	326	0.16633	0.11256			43	7.212	2.285				37	150	0.00022	0.00019			43	22.218	4.332
37	150	0.00467	0.00464			44	8.324	1.827				37	287	0.00133	0.00117			44	4.661	0.93
37	149	0.02933	0.03529			45	7.22	2.919				37	284	0	0			45	0.504	0.43
37	284	0.07367	0.09899			46	43.415	3.494				37	290	0.58967	0.34975			46	28.278	2.903
37	290	1.31967	0.54902			47	12.493	0.841				37	298	0.94511	0.27485			47	9.984	1.331
37	298	0.01811	0.01184			48	5.941	0.955				37	319	0	0			48	3.488	0.938
37	319	0.01233	0.01683			49	4.982	2.456				37	151	0.00133	0.00114			49	1.431	1.054
37	151	0.00067	0.00072			50	4.975	0.788				37	323	0.45622	0.26691			50	5.456	1.274
37	323	0.34411	0.25577			51	11.373	0.814				37	147	1.04844	0.40615			51	11.715	1.092
37	147	0.608	0.22665			52	0.295	0.115				37	294	0.81178	0.59315			52	0.066	0.039
37	221	0.11156	0.14874			53	6.498	1.774				37	141	0	0			53	3.66	0.955
37	219	0.07167	0.09556			54	33.277	3.113				37	317	0.00278	0.00322			54	28.562	3.073
37	294	0.06422	0.04825			55	5.193	0.472				37	148	0.09311	0.07583			55	5.697	0.377
37	282	0.00111	0.00131			56	0.031	0.033				37	299	0.00133	0.00106			56	0.006	0.004
37	143	0.19756	0.26341			57	21.143	2.787				37	295	0.58533	0.43096			57	20.743	4.229
37	139	0.00056	0.00074			58	18.147	2.644				37	321	0.55944	0.4075			58	18.518	1.896
37	317	0.471	0.6226			59	8.428	1.101				37	286	0.19689	0.15599			59	9.507	1.12
37	325	0.00011	0.00015			60	0.373	0.213				37	291	0.00222	0.00221			60	0.789	0.605
37	295	0.45244	0.56886			61	13.106	2.26				37	145	0.21067	0.13963			61	20.563	2.409
37	321	0.95178	0.53262			62	16.857	2.015				37	318	0.21067	0.14487			62	26.929	2.724
37	153	0.12422	0.16563			63	0.032	0.026				37	293	0.27989	0.22947			63	4.001	0.739
37	218	0.09467	0.12622			64	7.799	1.974				37	301	1.99211	0.77058			64	10.08	2.834
37	286	0.38044	0.30363			65	50.365	6.253				37	289	0.02722	0.02778			65	48.434	3.536
37	291	0.07967	0.10633			66	8.685	3.06				37	320	0.00011	0.00015			66	11.403	2.749
37	145	0.09711	0.06044			67	3.6	2.082				37	297	1.87	0.55291			67	5.48	3.261
37	287	0.22356	0.25258			68	8.015	1.972				37	228	0.00078	0.00065			68	8.99	2.073
37	316	0.00011	0.00015			69	7.365	3.106				37	304	0.01033	0.00667			69	13.153	3.347
37	293	0.42933	0.30348			70	5.119	2.813				37	144	0.03844	0.03314			70	7.193	2.725
37	324	0.20422	0.26082			71	4.442	1.549				37	285	0.283	0.1813			71	13.28	3.759
37	301	0.07344	0.0523									37	281	0.23067	0.23316
37	148	0.19333	0.13227									37	322	0.039	0.02161
37	156	0	0									38	323	0.25189	0.13486
37	283	0.21667	0.18575									38	147	1.28556	0.32336
37	289	0.19389	0.0891									38	145	0.18233	0.07262
37	320	0.00467	0.00386									38	293	0.02367	0.03277
37	297	0.05822	0.05224									38	301	0.13189	0.10469
37	140	0.00056	0.00074									38	321	0.007	0.00507
37	144	0.26033	0.35059									38	289	0.00022	0.0003
37	285	0.00856	0.00685									38	297	0.802	0.40206
37	142	0.00078	0.00105									38	295	0.01033	0.00874
37	322	0.44411	0.3411									38	299	0.00044	0.0003
37	281	0.00056	0.00075									38	148	0.12556	0.06283
38	323	1.21933	0.518									38	146	0.09911	0.07194
38	147	0.22844	0.19119									38	318	0.00111	0.0015
38	145	0.01544	0.01389									38	285	0.01322	0.01513
38	221	0.06278	0.0837									38	326	0.00022	0.00018
38	293	0.38967	0.48883									38	281	0.01511	0.01323
38	301	0.02656	0.03209									38	290	0.02678	0.0203
38	143	0.00533	0.00711									38	298	0.65233	0.34648
38	218	0.10167	0.13556									38	300	0.00033	0.0003
38	289	0.01256	0.01051									38	296	0.00467	0.00614
38	297	0.02033	0.02128									38	294	0.049	0.05418
38	322	0.80944	0.65432									38	286	0.00078	0.00054
38	295	0.18056	0.2423									38	144	0.01289	0.01401
38	291	0.03444	0.04593									38	151	0.00011	0.00015
38	324	0.049	0.06238									39	144	0.00022	0.0003
38	148	0.01933	0.02326									39	290	0.00511	0.00649
38	219	0.00244	0.00326									39	298	0.42811	0.30671
38	146	0.21756	0.14846									39	300	0.02811	0.03331
38	285	0.00267	0.00361									39	142	0.00033	0.00044
38	320	0.00044	0.0006									39	296	0.00011	0.00015
38	318	0.00756	0.00797									39	294	0.00233	0.00281
38	326	0.08244	0.07146									39	151	0	0
38	150	0.00033	0.00044									39	286	0	0
38	281	0	0									39	323	0.55833	0.2437
38	287	0.082	0.07149									39	147	2.36689	0.50246
38	144	0.14678	0.1969									39	145	0.23422	0.17578
38	290	0.22767	0.15772									39	293	0.05444	0.07483
38	298	0.02767	0.02946									39	301	0.06733	0.04864
38	292	0.00044	0.00037									39	299	0.00022	0.0003
38	220	0	0									39	297	0.29756	0.26494
38	288	0.17433	0.201									39	295	0	0
38	296	0.00011	0.00015									39	285	0.00044	0.00044
38	294	0.10467	0.12405									39	318	0	0
38	282	0	0									39	322	0.00033	0.00045
38	284	0.00022	0.0003									39	326	0.00022	0.00019
38	286	0.10044	0.12355									39	281	0.00344	0.0047
38	317	0.00044	0.00029									39	321	0.00278	0.00315
38	149	0.00311	0.00382									39	324	0	0
38	283	0.00056	0.00059									39	148	0.59389	0.30647
38	321	1.141	0.68467									39	146	0.20789	0.27583
38	153	0.00011	0.00015									40	301	0.00722	0.00978
39	144	0.14767	0.19957									40	142	0.10533	0.08151
39	290	0.11344	0.08343									40	148	2.26789	0.33682
39	298	0.009	0.01191									40	300	0.05344	0.06968
39	292	0.00022	0.0003									40	146	0.00644	0.00444
39	296	0	0									40	323	0.00256	0.00313
39	294	0.14278	0.12766									40	147	2.399	0.57213
39	222	0	0									40	293	0	0
39	304	0.00233	0.00314									40	299	0.017	0.02302
39	317	0.009	0.0095									40	145	1.66611	0.37623
39	288	0.22556	0.14183									40	144	0	0
39	327	0.00311	0.00415									40	298	0.66733	0.56024
39	321	2.20611	0.9696									40	297	0.11833	0.09383
39	286	0.113	0.09285									40	296	0	0
39	323	2.38911	1.2482									40	141	0	0
39	145	0.001	0.00091									40	281	0.00156	0.00178
39	223	0.023	0.03067									41	297	0.01056	0.01393
39	219	0.00011	0.00015									41	298	0.02822	0.03821
39	293	0.71211	0.59572									41	145	0.58956	0.4478
39	301	0.10567	0.06107									41	301	0	0
39	221	0.10011	0.13348									41	294	0	0
39	289	0.00056	0.00077									41	142	0.09367	0.11019
39	297	0.05511	0.04915									41	147	2.33622	0.52232
39	295	0.02122	0.02331									41	293	0.00011	0.00015
39	215	0	0									41	148	5.29067	0.6818
39	224	0	0									41	300	0	0
39	291	0	0									41	146	0.00733	0.00576
39	285	0.192	0.25762									41	281	0.00011	0.00015
39	220	0	0									41	139	0	0
39	318	0.08956	0.10282									41	151	0.00122	0.00102
39	322	1.95011	1.25382									41	144	0.00067	0.0009
39	281	0.03256	0.04341									42	145	0.00011	0.00015
39	147	0.17811	0.0798									42	290	0	0
39	287	0.177	0.105									42	148	0.05422	0.04402
39	218	0.03978	0.05304									42	300	0.04367	0.05794
39	324	0.42889	0.29037									42	323	2.91433	0.96652
39	148	0.02478	0.0249									42	147	0.00011	0.00015
39	146	0.09467	0.08249									42	298	0.00089	0.00066
39	283	0.00167	0.0015									42	142	0	0
39	149	0	0									43	298	6.43078	1.2718
39	320	0	0									43	326	0.46022	0.59112
39	326	0.15811	0.10785									43	141	0.14033	0.10455
39	143	0.00089	0.00119									43	144	0.00311	0.00199
39	150	0	0									43	281	0.72189	0.42309
40	301	0.01033	0.0074									43	301	0.47244	0.14685
40	141	0	0									43	294	0	0
40	221	0.00333	0.00444									43	303	0.00778	0.00971
40	324	0.23322	0.15275									43	321	0.01222	0.01486
40	322	0.416	0.22055									43	142	0.01433	0.01512
40	290	0	0									43	293	0	0
40	300	0.01389	0.01284									43	322	0.00056	0.00075
40	143	0.00022	0.0003									43	296	0	0
40	146	0.05644	0.03711									43	145	1.76511	0.57791
40	287	0.01289	0.01713									43	318	0	0
40	285	0.00589	0.00785									43	146	0.00211	0.00164
40	323	3.43822	1.1725									43	304	0.53733	0.49714
40	321	0.16189	0.1036									43	285	0.02778	0.03457
40	288	0.00089	0.00119									43	290	0.00011	0.00015
40	147	0.11678	0.09595									43	323	5.94278	2.47655
40	293	0.02822	0.02942									43	147	0.13911	0.09495
40	145	0.04322	0.03898									43	299	1.91056	0.80631
40	286	0.00511	0.00422									43	148	0.389	0.30472
40	292	0	0									43	138	0	0
40	318	0.00122	0.00163									43	300	2.71733	0.6636
40	144	0.17233	0.22603									43	297	0.52389	0.2848
40	283	0.00011	0.00015									44	138	0.27211	0.198
40	289	0.00011	0.00015									44	281	0	0
40	148	0	0									44	298	0.13311	0.12917
40	298	0.05922	0.06941									44	142	1.27656	0.3098
40	327	0.00322	0.0043									44	147	0.00356	0.00235
40	326	0.01711	0.01753									44	141	0.133	0.06885
40	218	0	0									44	299	0.07156	0.07442
40	297	0.17056	0.13441									44	145	1.238	0.22115
40	295	0.00011	0.00015									44	144	0.02056	0.02087
40	304	0	0									44	148	1.36122	0.41825
40	281	0.00689	0.00919									44	300	0.15133	0.15647
40	294	0.16233	0.21833									45	145	0.15933	0.20425
40	149	0.00278	0.0037									45	148	0.163	0.10261
41	288	0.39567	0.23309									45	142	0.068	0.07866
41	285	0.00156	0.00137									45	147	0.00011	0.00015
41	297	0.80256	0.31894									45	138	0.00022	0.0003
41	298	1.17933	0.43877									45	323	0.11311	0.13086
41	319	0	0									45	141	0	0
41	317	0.002	0.00269									46	298	0.45811	0.41051
41	295	0.15622	0.1232									46	331	0.00033	0.00044
41	326	0.21478	0.15597									46	273	0.00056	0.00074
41	296	0.00067	0.00036									46	321	0.00011	0.00015
41	318	0.07489	0.04014									46	327	2.46767	0.58902
41	301	1.77822	0.85729									46	301	0.33922	0.45489
41	294	0.06944	0.06196									46	322	0.00356	0.00428
41	141	0	0									46	323	14.7241	1.94679
41	323	6.14767	1.81103									46	330	0.00911	0.00714
41	321	1.84478	0.88638									46	299	0.42767	0.30637
41	142	0	0									46	303	1.20967	0.70917
41	327	0	0									46	326	0.26267	0.29556
41	147	0.39078	0.2012									46	328	0.019	0.02533
41	293	0.13667	0.08249									46	307	0.00856	0.00923
41	324	0.00222	0.00301									46	297	0.00122	0.00163
41	322	0.83722	0.88049									46	304	3.28489	1.42273
41	299	0.00333	0.00451									46	324	1.98789	0.80805
41	148	0.08333	0.06409									46	300	3.07411	1.24169
41	287	0.05489	0.04701									47	323	0.14178	0.14894
41	304	0.00178	0.00161									47	137	0.025	0.02683
41	300	0.25078	0.20102									47	303	1.10233	0.36839
41	145	0.93511	0.69495									47	299	3.707	0.61367
41	146	0.59411	0.31845									47	277	0	0
41	281	0.00111	0.00152									47	304	0.08956	0.07971
41	286	0.00189	0.00159									47	148	0	0
41	284	0	0									47	138	0.71033	0.22264
41	289	0.03856	0.02515									47	300	1.59322	0.19796
41	320	0	0									47	134	0.00622	0.00836
41	292	0.00022	0.0003									47	144	0.00078	0.00074
41	290	0.56067	0.27173									47	281	0.02489	0.03017
41	144	0.24911	0.12105									47	298	0.06189	0.05854
42	146	0.07878	0.03439									47	274	0.00578	0.00776
42	285	0.00011	0.00015									47	142	0.59878	0.25361
42	321	0.02367	0.03083									47	327	0	0
42	287	0.00133	0.00178									47	141	1.64322	0.28842
42	293	0.00367	0.00383									47	273	0	0
42	222	0.119	0.15867									47	145	0.27322	0.07456
42	145	2.43033	0.52514									48	135	0.00011	0.00015
42	286	0	0									48	141	0.26678	0.24451
42	223	0	0									48	134	0.07633	0.09181
42	290	0.00067	0.00058									48	323	0.00056	0.00074
42	324	0.26489	0.35319									48	139	0.00011	0.00015
42	148	1.75022	0.50546									48	138	2.70911	0.44744
42	138	0.00344	0.00328									48	299	0.00033	0.0003
42	300	0.05056	0.02855									48	142	0.43033	0.24573
42	304	0.00033	0.00044									48	137	0	0
42	281	0.044	0.04383									48	145	0.00256	0.0019
42	289	0.00056	0.00074									48	148	0.00133	0.00098
42	323	1.22211	0.91307									49	300	0.02089	0.02785
42	147	2.11033	0.57567									49	328	0.02267	0.01879
42	288	0.00122	0.00163									49	304	0.00511	0.00556
42	299	0.04733	0.06439									49	327	0.50456	0.28731
42	298	0.84922	0.36086									49	331	0.00022	0.0003
42	326	0.00656	0.00565									49	270	0.00133	0.00181
42	297	0.367	0.1853									49	323	0.83522	0.56077
42	144	0.34433	0.3701									49	324	0.04033	0.05404
42	283	0.07811	0.10415									49	303	0.00056	0.00075
42	282	0.00022	0.0003									50	327	0.34222	0.20921
42	151	0.00044	0.0006									50	330	0.01556	0.01297
42	141	0.14944	0.13447									50	331	0.00556	0.00562
42	318	0.00044	0.00031									50	323	0.14667	0.09814
42	152	0	0									50	300	0.14067	0.18685
42	294	0.00333	0.00404									50	328	0.00967	0.01289
42	140	0	0									50	303	1.64322	0.25934
42	301	0.15456	0.09648									50	299	0.41022	0.34166
42	142	0.29022	0.10988									50	274	0.28756	0.09752
42	322	0.304	0.40533									50	304	0.51867	0.42282
42	295	0.00089	0.00105									50	270	1.636	0.6042
42	296	0.00011	0.00015									50	273	0.29978	0.17555
43	298	0.06233	0.05149									51	303	0.12544	0.09771
43	326	0.00622	0.00849									51	299	0.28044	0.12237
43	327	0.00144	0.00194									51	131	0	0
43	141	0.11367	0.14411									51	235	0	0
43	304	0.00044	0.00059									51	278	0	0
43	301	0.00167	0.00229									51	142	0.00056	0.00043
43	321	0.01489	0.0128									51	273	0.00033	0.00032
43	142	0.05522	0.03904									51	274	1.16478	0.17688
43	293	0	0									51	141	0.85522	0.26373
43	322	0.05967	0.07718									51	270	0.11367	0.07634
43	145	1.055	0.36596									51	271	0	0
43	318	0	0									51	133	0.001	0.00134
43	139	0.00044	0.00059									51	134	3.19944	0.35785
43	146	0.062	0.04236									51	135	0	0
43	290	0.00011	0.00015									51	130	0.08156	0.09252
43	323	2.49533	1.08799									51	238	0.01944	0.01228
43	147	1.05289	0.4829									51	138	3.41856	0.38396
43	324	0.15256	0.17379									51	137	2.45367	0.23295
43	148	1.96589	0.65709									52	138	0.03733	0.02551
43	138	0.01389	0.01719									52	134	0.02911	0.01413
43	144	0.01433	0.00933									52	130	0	0
43	300	0.08389	0.08074									53	327	0.10844	0.07043
43	299	0	0									53	323	0.04256	0.03232
43	297	0	0									53	304	0.00422	0.00563
44	331	0	0									53	334	0.00333	0.00273
44	138	0.01622	0.01697									53	266	0.00067	0.0006
44	318	0.00033	0.00044									53	271	0	0
44	327	0.90011	0.33403									53	332	0.00444	0.00593
44	304	0.027	0.03628									53	335	0.125	0.11338
44	298	0.12978	0.05837									53	328	0.00244	0.00264
44	142	0.09722	0.06568									53	324	0.00011	0.00015
44	332	0.00011	0.00015									53	330	0.01189	0.01585
44	323	5.03022	1.10088									53	303	0.00011	0.00015
44	321	0.01778	0.0237									53	273	0	0
44	147	0.00011	0.00015									53	331	0.434	0.32618
44	141	0.16	0.09565									53	270	2.923	0.65152
44	299	0	0									54	299	0	0
44	145	0.33622	0.16275									54	335	0.00289	0.00294
44	301	0.02256	0.03051									54	239	0.00011	0.00015
44	144	0.00122	0.00061									54	269	0.00022	0.00019
44	324	0.92311	0.4106									54	270	10.5193	1.4391
44	322	0.03089	0.04119									54	273	0.29289	0.20586
44	148	0.05756	0.03445									54	267	6.33156	1.13734
44	300	0.37744	0.09072									54	303	0.06311	0.06815
44	326	0.19544	0.26262									54	307	0.00133	0.00131
44	328	0	0									54	134	0.68122	0.12621
44	297	0	0									54	248	0.01822	0.02069
45	145	0.51089	0.22089									54	304	0.10844	0.11007
45	222	0.18589	0.24785									54	333	0.00033	0.00044
45	301	0.001	0.00067									54	334	0.01378	0.0162
45	137	0	0									54	266	0.00611	0.00579
45	144	0.00744	0.00997									54	274	3.33311	0.43929
45	324	0.00033	0.00045									54	331	0.05722	0.03467
45	322	0	0									54	238	2.14711	0.35433
45	148	0.67911	0.34005									54	275	0.02278	0.01915
45	300	0.47289	0.21806									54	130	1.53744	0.35619
45	326	0.00578	0.00491									54	327	0.00011	0.00015
45	327	0.208	0.26444									54	330	0.02056	0.02783
45	138	0.10489	0.08248									54	271	2.97589	0.92613
45	139	0.00033	0.00044									54	137	0.36522	0.15056
45	298	0.09133	0.05615									54	235	0.00056	0.00043
45	323	4.09789	2.14615									54	133	0.00033	0.00045
45	142	0.454	0.17395									54	241	0.06189	0.07007
45	147	0.00367	0.00227									55	134	1.29889	0.15534
45	303	0	0									55	238	0	0
45	141	0.39622	0.20492									55	271	0	0
45	299	0.00011	0.00015									55	130	3.43756	0.37516
46	318	0	0									55	127	0.942	0.27943
46	333	0.00367	0.00319									55	131	0.01833	0.01209
46	308	0.011	0.00959									55	270	0.00022	0.00018
46	298	0.00011	0.00015									56	263	0.00089	0.00071
46	274	0	0									56	134	0	0
46	311	0	0									56	131	0.00011	0.00015
46	331	0.74322	0.32591									56	331	0	0
46	317	0.00156	0.00137									56	130	0.00022	0.0002
46	321	0.00044	0.00059									56	335	0	0
46	327	6.81389	0.76951									56	127	0.00433	0.00288
46	141	0	0									57	271	0.00011	0.00015
46	329	0.07933	0.10578									57	332	0.00011	0.00015
46	315	0	0									57	266	4.94878	1.13707
46	145	0.00011	0.00015									57	270	4.65078	0.56777
46	323	5.47344	1.21888									57	335	0.29844	0.23047
46	335	0.00422	0.00563									57	263	2.75878	0.51274
46	325	0.00044	0.00059									57	264	0	0
46	301	0.00278	0.00298									57	334	0.00667	0.00797
46	313	0	0									57	262	0.00011	0.00015
46	319	0.00078	0.00104									57	267	8.06044	1.42815
46	270	0.00389	0.00527									57	331	0.01867	0.02078
46	330	6.12989	0.86795									58	245	0	0
46	299	0.00022	0.0003									58	131	0	0
46	303	4.20956	0.77918									58	127	0.49978	0.18542
46	320	0.00611	0.00815									58	267	8.10322	1.12683
46	326	2.23033	1.21179									58	130	8.19589	0.52281
46	307	1.98444	0.32701									58	244	0	0
46	304	11.8881	1.66864									58	134	0.00078	0.00046
46	273	0.00678	0.00925									58	248	0.00033	0.00044
46	334	0.05256	0.06162									58	270	0.09522	0.10172
46	300	3.76811	0.61509									58	242	0.00522	0.00712
47	323	0	0									58	241	1.21256	0.31208
47	137	0.12533	0.10361									58	271	0.01856	0.02457
47	299	2.39456	0.56079									58	123	0.00011	0.00015
47	303	2.31311	0.41192									58	247	0.001	0.00133
47	330	0.00078	0.00104									58	238	0.385	0.17492
47	307	0.01022	0.01363									59	130	0.99211	0.38113
47	222	0.27922	0.19948									59	123	1.992	0.24365
47	226	0.00011	0.00015									59	124	0	0
47	274	0.00333	0.00451									59	120	0.00022	0.0003
47	304	0.18644	0.25034									59	134	0	0
47	148	0	0									59	126	0	0
47	138	1.14933	0.54804									59	131	0.00489	0.00322
47	300	3.32589	0.40895									59	127	6.51767	0.8004
47	134	0.047	0.06139									60	264	0	0
47	144	0.00022	0.00019									60	260	0.00367	0.00416
47	298	0.01589	0.01051									60	263	0.785	0.41797
47	142	0.20878	0.16284									60	259	0	0
47	141	2.35022	0.4229									61	267	7.29556	0.91597
47	278	0	0									61	242	0.06256	0.0414
47	301	0	0									61	263	4.31278	0.31091
47	145	0.08289	0.07411									61	245	2.66844	0.70147
48	222	0.04211	0.05615									61	268	0	0
48	323	0	0									61	248	0.00478	0.00422
48	135	0.00189	0.00256									61	246	0.09589	0.12064
48	141	1.08956	0.262									61	251	0	0
48	134	0.15556	0.09138									61	270	0.00122	0.00105
48	139	0.00033	0.0003									61	244	0.341	0.12725
48	300	0.00078	0.00104									61	241	0.17111	0.08744
48	303	0.00422	0.00563									61	264	1.94767	0.37185
48	138	3.83878	0.48493									61	260	1.84189	0.73803
48	299	0	0									61	247	1.81544	0.33682
48	131	0	0									61	266	0.00489	0.00329
48	142	0.63144	0.21573									61	238	0	0
48	137	0.13289	0.15549									62	246	0.01689	0.02269
48	145	0.04222	0.0221									62	241	2.10189	0.29055
48	148	0.00022	0.0002									62	123	6.574	0.77349
48	232	0	0									62	130	1.633	0.34186
48	327	0	0									62	244	10.0258	1.42222
49	328	0.00656	0.0089									62	126	1.61233	0.31376
49	304	0.00111	0.00148									62	238	0.00044	0.00061
49	327	2.32411	0.55988									62	242	0.02389	0.01252
49	322	0.00011	0.00015									62	260	0	0
49	326	0.33522	0.45352									62	243	0.00011	0.00015
49	331	0.78633	0.19249									62	122	0.00033	0.00032
49	332	0.07911	0.08976									62	118	0	0
49	307	0.00344	0.00463									62	247	0.00056	0.00037
49	270	0	0									62	120	0.00111	0.00148
49	335	0.00122	0.00107									62	267	0.00789	0.00988
49	323	0.88422	0.60281									62	245	1.49589	0.31178
49	324	0.00022	0.0002									62	127	3.421	0.40135
49	330	0.55189	0.44284									62	240	0.01433	0.00844
49	334	0.008	0.00743									63	127	0.00022	0.0003
50	327	0.01156	0.01552									63	120	0.10678	0.08179
50	330	0.26456	0.30377									63	263	0.00011	0.00015
50	307	0.27222	0.17608									63	123	3.88989	0.40594
50	334	0.00678	0.0061									63	259	0.00033	0.0003
50	331	0.14133	0.04612									63	244	0.00267	0.00198
50	335	0	0									63	260	0.00044	0.00044
50	300	0.00511	0.00514									64	264	0.023	0.0189
50	299	0.00189	0.00221									64	263	1.40889	0.17698
50	303	2.59467	0.26827									64	366	0	0
50	274	0.17567	0.08841									64	358	0.00189	0.00238
50	304	0.00122	0.00165									64	370	0	0
50	270	1.392	0.2941									64	261	0.00011	0.00015
50	232	0	0									64	362	0.00011	0.00015
50	273	0.10756	0.03401									64	246	0.00011	0.00015
51	303	0.33033	0.13823									64	259	1.65478	1.04841
51	299	0.073	0.02975									64	260	6.98756	1.0259
51	131	0	0									64	353	0.00033	0.00044
51	278	0	0									64	245	0.003	0.00377
51	273	0.00011	0.00015									64	250	0.00022	0.0003
51	274	0.52367	0.11309									65	358	0.23867	0.22918
51	229	0.00567	0.00756									65	123	0.00044	0.00031
51	270	0.12878	0.09527									65	259	0	0
51	232	0.47756	0.33578									65	370	0.12844	0.17259
51	130	0.38322	0.25046									65	363	0.12444	0.16722
51	133	0.00189	0.00254									65	247	1.379	1.42011
51	134	4.50111	0.28735									65	261	0.00022	0.0003
51	222	0.05244	0.03979									65	115	0.021	0.02718
51	135	0	0									65	362	0.01667	0.01401
51	137	2.04889	0.17312									65	246	6.98911	2.42117
51	233	0.00022	0.0003									65	114	0	0
51	141	0.36422	0.17907									65	353	0.01411	0.01881
51	138	2.48144	0.4894									65	369	0.43367	0.58254
52	138	0.14811	0.07724									65	260	4.21033	1.0825
52	134	0.13822	0.04563									65	361	0.00033	0.00019
52	130	0.00922	0.00721									65	245	13.4197	0.87826
53	327	0.029	0.02782									65	360	0	0
53	334	0.73522	0.2735									65	244	10.3899	1.83273
53	266	0.00456	0.00353									65	354	0.00067	0.00089
53	307	0.00011	0.00015									65	367	0	0
53	332	0.04556	0.03569									65	250	0.31867	0.25903
53	335	0.77456	0.32306									65	243	1.76178	0.40109
53	328	0	0									65	118	0.46367	0.20281
53	330	0.18811	0.24771									65	263	0.29133	0.21829
53	340	0.00678	0.00625									65	264	0.03489	0.0295
53	267	0	0									65	119	0.00011	0.00015
53	273	0.00011	0.00015									65	249	0.93333	0.4387
53	331	1.71689	0.75247									65	357	0.00144	0.00193
53	270	2.99633	0.29111									65	365	0.03767	0.0505
53	275	0.00033	0.00044									65	117	2.81189	0.67672
54	131	0	0									65	366	0.00011	0.00015
54	335	0	0									65	368	0.00167	0.00224
54	127	0	0									65	242	0.08889	0.04838
54	236	0.39167	0.23633									65	364	0.25078	0.33882
54	269	0	0									65	116	4.06767	1.01923
54	270	11.741	0.93283									65	267	0.00322	0.00397
54	340	0.08467	0.11409									66	244	3.01122	0.59221
54	232	5.83078	0.81899									66	118	3.59589	0.84405
54	273	0.09611	0.06947									66	366	0	0
54	267	6.28089	1.34421									66	367	0.00033	0.00019
54	235	0.00144	0.00113									66	245	0.02022	0.01956
54	303	0.01078	0.01441									66	365	0	0
54	307	0.00333	0.00402									66	243	0	0
54	134	0.82778	0.16788									66	117	0.44056	0.13768
54	334	0.05356	0.05567									66	370	0.00411	0.00311
54	266	0.05978	0.0739									66	368	0.00011	0.00015
54	274	2.54	0.46509									66	122	0.00033	0.00022
54	275	0.00011	0.00015									66	116	0.10367	0.1106
54	130	3.69833	0.36151									66	119	0.95578	0.49843
54	229	0.00033	0.0003									66	362	0	0
54	330	0.00033	0.00044									66	369	0.041	0.04365
54	271	1.56078	0.37377									66	123	2.94078	0.30723
54	137	0.00933	0.00819									66	363	0.03056	0.04074
54	233	0.08589	0.06569									66	120	0.25911	0.14762
55	134	1.11433	0.22353									67	362	0.08656	0.10168
55	130	2.58833	0.4734									67	246	0	0
55	131	0.06689	0.02741									67	120	0.00578	0.00746
55	127	1.354	0.23363									67	353	0.00011	0.00015
55	267	0.00033	0.00045									67	369	0.00078	0.00089
55	270	0	0									67	255	0	0
55	232	0.06856	0.03672									67	364	0.00022	0.0003
56	263	0	0									67	250	0	0
56	131	0.001	0.00122									67	116	0	0
56	327	0.00011	0.00015									67	361	0	0
56	332	0.00011	0.00015									67	259	3.65	1.98684
56	331	0.00011	0.00015									67	363	0.00022	0.0003
56	130	0.001	0.00101									67	247	0.00033	0.00044
56	134	0.00089	0.00119									67	354	0.00211	0.00281
56	335	0.01244	0.01352									67	257	0.00144	0.00193
56	127	0.01444	0.01818									67	260	1.315	1.01101
57	232	0.02467	0.02083									67	368	0.00122	0.00103
57	271	0	0									67	244	0.00011	0.00015
57	266	4.50044	0.63785									67	118	0.24956	0.34171
57	270	4.40967	0.92258									67	367	0.01267	0.01014
57	335	0.04011	0.04019									67	357	0.00044	0.00059
57	236	0.12922	0.11408									67	359	0.00033	0.0002
57	263	2.63311	0.41629									67	365	0.00156	0.00161
57	334	0.00089	0.00074									67	117	0.00378	0.00504
57	240	0	0									67	366	0.01033	0.01236
57	340	0.00022	0.00018									67	263	0.08167	0.09683
57	262	0.11611	0.11953									67	119	0.034	0.04533
57	267	9.288	1.07824									67	358	0.00089	0.00088
57	255	0.00044	0.0006									67	256	0.01156	0.00831
57	331	0	0									67	370	0.00056	0.00076
58	235	0.45267	0.15146									67	264	0.00867	0.01156
58	127	2.38611	0.60382									68	357	0.03789	0.05052
58	239	0.25867	0.09881									68	368	0.00833	0.01082
58	233	0	0									68	364	0.47889	0.53955
58	263	0.00056	0.00058									68	116	0.43489	0.53688
58	240	0.062	0.08267									68	353	0.04822	0.0643
58	131	0.01956	0.02524									68	261	0.02711	0.0287
58	267	6.14144	1.31393									68	360	0.001	0.00134
58	130	7.46333	0.89418									68	365	0.38322	0.34286
58	134	0.005	0.00585									68	257	0.00122	0.00106
58	270	0.00089	0.00121									68	117	0.15111	0.20148
58	232	0.64233	0.26461									68	354	0.01467	0.01956
58	123	0.07467	0.06757									68	370	0.05233	0.06529
58	126	0	0									68	361	0.06533	0.04585
58	236	0.63878	0.25799									68	362	1.22244	0.62771
58	238	0	0									68	244	0.00022	0.0003
59	130	0.55167	0.65029									68	247	0.00022	0.0003
59	123	0.00033	0.00045									68	264	0.00011	0.00015
59	259	0	0									68	260	3.07578	0.56485
59	124	0	0									68	118	0.23344	0.31416
59	127	7.83878	0.75951									68	249	0.00022	0.0003
59	134	0	0									68	245	0.011	0.01478
59	126	0.00011	0.00015									68	366	0.06689	0.05111
59	235	0	0									68	250	0.11911	0.10735
59	131	0.03678	0.02094									68	367	0.04056	0.03869
59	267	0.00011	0.00015									68	358	0.516	0.40111
59	120	0.00044	0.00059									68	369	0.083	0.10037
60	244	0.00022	0.0003									68	359	0.27311	0.29937
60	255	0.02889	0.03852									68	355	0.00222	0.00197
60	256	0.00533	0.00717									68	263	0.006	0.00806
60	267	0.00022	0.0003									68	246	0.15544	0.20726
60	260	0.00467	0.00637									68	259	1.46333	0.47107
60	263	0.32533	0.12461									68	256	0.00211	0.00284
60	259	0.00789	0.00865									68	363	0.01367	0.01072
61	262	0.07122	0.09353									69	249	0.10378	0.10121
61	267	4.30033	0.68723									69	260	0.112	0.13313
61	236	0.32844	0.16187									69	245	0.00178	0.0019
61	127	0.01111	0.01493									69	118	3.83589	0.76343
61	239	1.47111	0.33978									69	244	0.00156	0.00143
61	263	4.53344	0.25752									69	354	0.00022	0.0003
61	256	0	0									69	367	0.318	0.19541
61	243	0.006	0.008									69	366	1.03678	0.65022
61	232	0.00067	0.0009									69	353	0.00433	0.00578
61	266	0.00089	0.0012									69	359	0.02422	0.02564
61	123	0.29589	0.26152									69	250	0	0
61	259	0.35511	0.45022									69	111	0	0
61	268	0	0									69	119	0.00522	0.00466
61	255	0.13489	0.18125									69	259	0.00089	0.00059
61	248	0	0									69	363	0.35167	0.32454
61	235	0.04833	0.0338									69	115	0.17122	0.21926
61	244	0.38856	0.18206									69	357	0.02278	0.03061
61	264	0.45178	0.10433									69	369	0.319	0.25276
61	258	0.00022	0.0003									69	261	0.00044	0.00061
61	260	0.37744	0.30202									69	365	0.97489	0.36945
61	130	0.00133	0.00178									69	117	0.87033	0.35121
61	240	0.32944	0.26448									69	257	0.00011	0.00015
61	238	0.00011	0.00015									69	368	0.20222	0.15044
62	123	7.47089	1.38598									69	361	0.17733	0.13319
62	130	0.12511	0.13051									69	364	0.33822	0.42619
62	119	0.00044	0.00044									69	120	0.00322	0.00286
62	244	0.00022	0.0003									69	181	0.00011	0.00015
62	126	0.655	0.18689									69	113	0.00189	0.00252
62	235	0.69578	0.30521									69	116	2.87256	1.02365
62	242	0.00489	0.00644									69	360	0.00078	0.00105
62	124	0.69544	0.46648									69	112	0.22256	0.31209
62	260	0	0									69	370	0.03733	0.02123
62	240	0.05967	0.07962									69	122	0	0
62	122	0	0									69	358	0.15411	0.14957
62	238	0.53889	0.19547									69	362	0.98467	0.69226
62	236	0.18067	0.24526									69	243	0	0
62	118	0.00011	0.00015									69	356	0.00278	0.0037
62	120	0.18667	0.22047									70	258	0.00178	0.00221
62	128	0	0									70	117	0.00011	0.00015
62	131	0.001	0.00134									70	257	0.03956	0.0357
62	267	0.00078	0.00056									70	370	0.06322	0.05156
62	127	4.68344	0.61603									70	361	0.37656	0.32408
62	239	1.52556	0.28135									70	119	0.01489	0.01212
62	263	0.001	0.00133									70	259	0.23722	0.20277
62	232	0.03111	0.0302									70	363	0.38311	0.32973
62	243	0.00033	0.0003									70	362	0.73844	0.32462
62	117	0	0									70	250	0.00422	0.00513
63	127	0.02344	0.01492									70	115	0	0
63	120	0.00122	0.00149									70	368	0.34967	0.32883
63	256	0.00078	0.00067									70	364	0.18256	0.19364
63	263	0	0									70	120	0.01178	0.01469
63	123	0.00011	0.00015									70	360	0.00367	0.00223
63	259	0.00578	0.00522									70	112	0	0
63	124	0	0									70	118	1.01889	0.44927
63	260	0.00044	0.00059									70	354	0.00589	0.00785
64	264	0.00022	0.00018									70	249	0.15744	0.2115
64	243	0.12611	0.09187									70	366	1.43878	0.99607
64	256	0.83056	0.55459									70	356	0.00011	0.00015
64	263	0.769	0.24329									70	346	0.00011	0.00015
64	366	0	0									70	116	0.19389	0.12939
64	242	0.01756	0.02341									70	260	0.206	0.19058
64	252	0	0									70	358	0.01833	0.015
64	239	0.00011	0.00015									70	256	0.00878	0.00988
64	255	0.09544	0.11948									70	246	0.00022	0.00018
64	259	3.40056	1.07078									70	355	0	0
64	260	2.31956	0.77915									70	367	0.384	0.28821
64	244	0.23944	0.27475									70	357	0.04389	0.05924
64	257	0	0									70	353	0.00022	0.0003
65	239	6.78122	1.69947									70	369	0.335	0.22343
65	123	6.49022	2.13459									70	261	0.03033	0.03783
65	259	1.00567	1.14431									70	359	0.03778	0.0376
65	247	0.25633	0.35211									70	365	0.90633	0.74241
65	122	0.00211	0.00248									71	354	0.04811	0.05895
65	261	0.00244	0.00326									71	366	1.11467	0.43513
65	268	0	0									71	356	0.00022	0.0003
65	260	5.39689	0.94282									71	250	0.47744	0.31565
65	257	0	0									71	260	0.30667	0.25981
65	118	0.72489	0.66567									71	358	0.85633	0.51815
65	245	0.02489	0.0337									71	254	0.00033	0.00045
65	120	0.89222	0.51782									71	367	0.49244	0.33769
65	124	0.02722	0.0363									71	357	0.15044	0.12722
65	244	5.53611	2.10205									71	246	0.13911	0.13166
65	238	0.17256	0.13809									71	256	0.20811	0.13974
65	236	0.06789	0.09122									71	353	0.03856	0.05141
65	232	0	0									71	369	0.11944	0.05009
65	243	15.1297	2.99439									71	261	0.01011	0.00739
65	256	0	0									71	359	1.29667	0.5759
65	263	0.53367	0.24795									71	365	1.08444	0.6166
65	127	0.00267	0.00356									71	181	0	0
65	242	3.71444	1.27212									71	117	0.00667	0.00844
65	264	0.40067	0.32723									71	257	0.23533	0.14458
65	119	0.82011	1.04095									71	258	0.00011	0.00015
65	241	0.165	0.14362									71	361	1.01344	0.60171
65	240	1.95589	1.24505									71	118	0.13733	0.09453
65	267	0.02533	0.03385									71	119	0.00722	0.00558
65	117	0.20722	0.14561									71	109	0.00011	0.00015
65	366	0	0									71	259	0.80189	0.35775
65	116	0.02889	0.03534									71	363	0.879	0.37776
65	364	0	0									71	115	0.00156	0.00193
65	235	0	0									71	370	0.02344	0.00928
66	244	0.00011	0.00015									71	121	0	0
66	118	0.01211	0.00988									71	122	0	0
66	243	0.49122	0.44385									71	362	1.81567	0.46547
66	127	0.11389	0.08086									71	368	0.245	0.13242
66	117	0.00022	0.0003									71	355	0.01378	0.01749
66	119	0.25022	0.15418									71	253	0.05456	0.05647
66	124	0.68978	0.43879									71	364	0.59311	0.37228
66	242	0.004	0.00537									71	120	0.001	0.00134
66	239	0.06911	0.09287									71	116	0.49467	0.28534
66	123	3.93744	1.78935									71	244	0	0
66	120	3.11633	0.6103									71	249	0.53489	0.52239
67	242	0.00022	0.0003									71	360	0.05811	0.03189
67	253	0.00644	0.00866									71	245	0.003	0.00354
67	364	0.00144	0.00178									71	112	0.01633	0.02137
67	123	0	0									71	247	0.00011	0.00015
67	259	1.35378	0.41486
67	363	0.00056	0.00075
67	260	0.02611	0.03589
67	252	0.06289	0.0845
67	120	0.00256	0.00349
67	249	0.02511	0.03191
67	244	0.00022	0.0003
67	367	0.00244	0.0031
67	365	0.00011	0.00015
67	243	0.65656	0.6978
67	366	0.04767	0.04369
67	263	0	0
67	119	0	0
67	256	1.40989	1.13483
67	255	0.00422	0.00563
68	367	0.00067	0.00073
68	364	0.00233	0.00264
68	120	0.17111	0.16409
68	116	0.00078	0.00104
68	360	0.00011	0.00015
68	365	0.00056	0.00074
68	361	0	0
68	244	0.29633	0.25742
68	362	0.00011	0.00015
68	255	0.00011	0.00015
68	260	0.77833	0.4067
68	243	3.40011	0.94138
68	256	0.59433	0.35279
68	242	0.08933	0.1173
68	241	0	0
68	358	0	0
68	261	0	0
68	366	0.02144	0.02376
68	123	0.00178	0.00101
68	119	0.00178	0.00145
68	118	0.019	0.01636
68	259	2.62433	1.09909
68	363	0.01289	0.01745
69	249	0.00022	0.0003
69	260	0.01789	0.01402
69	245	0	0
69	242	1.82356	0.96825
69	241	0.00078	0.0009
69	244	0.09556	0.13018
69	367	0.01778	0.02425
69	366	0.05222	0.06289
69	359	0	0
69	250	0	0
69	358	0	0
69	259	0.11	0.07858
69	123	0.24778	0.1614
69	119	0.37444	0.17907
69	363	0.015	0.01922
69	118	0.84333	0.36709
69	246	0.00433	0.00564
69	261	0	0
69	365	0.01822	0.02449
69	121	0.00389	0.00454
69	117	0.239	0.24215
69	257	0	0
69	361	0.00011	0.00015
69	364	0.02167	0.02064
69	120	0.79222	0.53852
69	116	0.09522	0.10454
69	109	0.00011	0.00015
69	239	0.00111	0.00092
69	360	0	0
69	112	0.00033	0.00045
69	238	0	0
69	247	0.00022	0.0003
69	362	0.00067	0.00048
69	243	2.57444	0.99771
69	256	0.01433	0.01312
70	258	0	0
70	117	0.04011	0.05021
70	257	0.00589	0.00608
70	361	0.00167	0.00175
70	123	0.00544	0.00455
70	122	0.00133	0.00179
70	119	0.23267	0.11585
70	109	0.00011	0.00015
70	362	0.01311	0.01657
70	250	0.00144	0.00194
70	364	0.01389	0.01076
70	120	1.59844	1.44273
70	360	0.00033	0.0003
70	112	0.00833	0.00405
70	118	0.64767	0.23015
70	354	0	0
70	249	0	0
70	121	0.00011	0.00015
70	245	0	0
70	260	0.045	0.03697
70	366	0.14511	0.10538
70	241	0.059	0.07873
70	247	0.00589	0.00773
70	116	0.06156	0.07421
70	358	0.00022	0.00019
70	243	1.08756	0.59661
70	244	0.00011	0.00015
70	242	0.866	0.71179
70	240	0	0
70	259	0.08922	0.07065
70	246	0.00044	0.00044
70	363	0.07189	0.06715
70	367	0.01967	0.01658
70	256	0.06856	0.03096
70	261	0.01322	0.01735
70	359	0.00011	0.00015
70	365	0.014	0.00906
71	354	0	0
71	243	1.15267	0.55593
71	366	0.20722	0.12593
71	250	0.00389	0.00523
71	358	0.07811	0.08114
71	242	0.23544	0.1547
71	252	0	0
71	367	0.03644	0.02525
71	240	0.00167	0.00222
71	246	0.01022	0.00638
71	261	0.00833	0.00694
71	359	0.08544	0.10048
71	365	0.07778	0.04156
71	181	0	0
71	112	0.01578	0.01569
71	117	0.00322	0.00315
71	257	0.061	0.05319
71	258	0	0
71	241	0.022	0.01875
71	118	0.29044	0.19757
71	123	0.00189	0.00119
71	119	0.07967	0.07593
71	109	0	0
71	259	0.48978	0.23049
71	363	0.22922	0.20467
71	256	0.67111	0.21463
71	121	0.001	0.00087
71	244	0.04678	0.05798
71	122	0	0
71	362	0.09367	0.08173
71	355	0.00656	0.00666
71	253	0.00011	0.00015
71	364	0.17089	0.13591
71	120	0.04589	0.03343
71	116	0.07667	0.06443
71	249	0.00089	0.00062
71	239	0	0
71	360	0.00344	0.0043
71	245	0.03756	0.0472
71	361	0.05356	0.04604
71	260	0.137	0.07882
71	247	0.00622	0.00766

## Sheet: Panel E - KCNQ1 mutants ephys
	KCNQ1 WT				KCNQ1 Y267F				KCNQ1 W323A				KCNQ1 W323F				KCNQ1 W323L				KCNQ1 K362A				KCNQ1 N365A
I-V curve
mV	Mean	SE			Mean	SE			Mean	SE			Mean	SE			Mean	SE			Mean	SE			Mean	SE
-80	0	1.817			-1.211	1.615			-1.615	1.615			-0.606	2.22			-0.202	1.615			-0.202	1.615			-1.413	1.615
-70	-0.404	2.018			-0.807	1.211			-1.211	1.211			-0.404	2.22			-0.606	1.211			-1.009	1.211			-1.211	1.211
-60	0	1.615			-0.807	1.817			-1.817	1.817			-0.404	1.817			-0.404	1.817			-1.009	1.817			-1.211	1.817
-50	0.202	1.615			-0.807	1.211			-1.009	1.211			-0.202	1.817			-0.202	1.211			-1.009	1.211			-1.009	1.211
-40	0.202	1.413			-0.606	1.413			-1.211	1.413			-0.202	2.018			-0.202	1.413			-0.404	1.413			-0.404	1.413
-30	0.404	1.615			-0.606	1.817			-1.009	1.817			-0.606	2.826			-0.202	1.817			-0.807	1.817			-0.404	1.817
-20	0.807	1.009			-0.807	1.615			-0.807	1.615			0.202	2.826			1.413	1.615			-1.413	1.615			0.202	1.615
-10	1.413	1.009			-0.404	1.623			-0.807	1.623			2.422	2.22			2.624	1.623			-0.606	1.623			0.202	1.623
0	5.046	1.211			-0.606	1.817			3.431	1.817			7.065	1.817			3.633	1.817			-0.202	1.817			1.615	1.817
10	16.35	2.422			0.807	2.22			6.661	2.22			14.129	2.018			5.652	2.22			0.807	2.22			2.826	2.22
20	33.708	3.23			3.028	1.211			11.303	1.211			28.46	2.624			8.478	1.211			2.624	1.211			5.854	1.211
30	55.911	5.652			6.863	1.817			15.946	1.817			45.819	3.633			11.707	1.817			6.459	1.817			9.689	1.817
40	84.17	7.468			12.918	1.817			22.809	1.817			67.618	5.046			15.744	1.817			12.111	1.817			15.138	1.817
50	115.052	10.294			20.588	2.624			29.469	2.624			94.262	6.055			20.185	2.624			21.598	2.624			24.827	2.624
60	145.329	12.514			29.066	3.028			36.938	3.028			121.107	8.276			25.836	3.028			33.708	3.028			36.938	3.028
n =	77				61				56				72				61				65				67
Activation curve
mV	Mean	SE			Mean	SE			Mean	SE			Mean	SE			Mean	SE			Mean	SE			Mean	SE
-80	-0.042	0.013			0.029	0.015			-0.029	0.013			0.003	0.015			0.054	0.019			-0.008	0.015			-0.011	0.014
-70	-0.048	0.013			0.031	0.019			0.012	0.008			0.008	0.018			0.049	0.022			-0.013	0.015			0.009	0.018
-60	-0.047	0.011			0.042	0.018			-0.018	0.023			0.014	0.015			0.056	0.018			-0.012	0.016			0.015	0.014
-50	-0.04	0.012			0.002	0.019			0.005	0.015			0.006	0.01			0.095	0.021			-0.008	0.013			-0.01	0.009
-40	-0.041	0.015			0.005	0.041			0.041	0.015			0.032	0.01			0.085	0.015			0.001	0.019			0.025	0.013
-30	-0.026	0.013			0.045	0.024			0.045	0.02			0.05	0.013			0.108	0.019			0	0.016			0.006	0.015
-20	-0.01	0.012			0.049	0.025			0.075	0.013			0.074	0.014			0.199	0.022			-0.004	0.015			0.042	0.015
-10	0.012	0.01			0.074	0.023			0.185	0.021			0.091	0.013			0.25	0.023			0.027	0.016			0.038	0.02
0	0.077	0.01			0.096	0.02			0.239	0.025			0.148	0.013			0.328	0.024			0.033	0.017			0.064	0.019
10	0.175	0.015			0.11	0.016			0.36	0.027			0.243	0.013			0.477	0.018			0.062	0.017			0.074	0.023
20	0.333	0.014			0.149	0.019			0.49	0.025			0.37	0.013			0.526	0.024			0.116	0.017			0.144	0.022
30	0.508	0.013			0.315	0.018			0.615	0.023			0.536	0.014			0.658	0.028			0.229	0.019			0.222	0.024
40	0.696	0.011			0.476	0.025			0.718	0.02			0.679	0.009			0.753	0.019			0.393	0.018			0.404	0.019
50	0.87	0.014			0.685	0.02			0.852	0.019			0.856	0.007			0.849	0.024			0.656	0.018			0.653	0.016
60	1	0.008			0.998	0.022			1.001	0.018			1	0.019			0.997	0.016			1.015	0.014			1.015	0.007
n =	45				22				22				58				25				31				24
Activation time
mV	Mean	SE	n		Mean	SE	n		Mean	SE	n		Mean	SE	n		Mean	SE	n		Mean	SE	n		Mean	SE	n
0									6.48863	2.70264	6		5.28021	0.581797	27		1.98124	0.123758	5
10									4.01607	0.396347	25		4.69353	0.283249	46		1.7884	0.0708456	14
20	9.9353	2.83948	9		5.43177	2.63369	8		3.21068	0.285721	35		4.56637	0.368141	56		1.6175	0.0610301	30						4.13381	0.4808	13
30	6.92248	1.68509	15		4.80537	1.11844	18		2.64606	0.191647	40		3.15389	0.20163	61		1.52343	0.0472054	37						3.6347	0.384295	23
40	5.53313	0.817465	31		2.89573	0.27901	29		2.29994	0.174587	46		2.5836	0.162914	65		1.59904	0.111637	41						2.9927	0.249944	37
50	3.84388	0.52563	45		2.78764	0.194433	38		1.79817	0.0722254	47		2.16629	0.1575	65		1.49069	0.0531594	45		8.58989	2.61297	9		2.65636	0.181798	48
60	3.51567	0.469057	58		3.48375	0.409136	46		1.58775	0.0660298	48		1.81139	0.109348	70		1.44152	0.0703061	50		7.57135	1.79404	17		2.53802	0.13188	55
Deactivation time
mV	Mean	SE	n		Mean	SE	n		Mean	SE	n		Mean	SE	n		Mean	SE	n		Mean	SE	n		Mean	SE	n
-100	0.114511	0.00167277	56						0.102433	0.00403577	12		0.0799755	0.00145579	49		0.0890579	0.00291005	19		0.0740833	0.00971076	6		0.0895882	0.00646196	17
-90	0.118412	0.00237774	41										0.0841763	0.0016363	38		0.1008	0.0103423	9						0.0937444	0.0067704	9
-80	0.115188	0.00421431	17										0.0935333	0.00616784	9
-70
-60	0.271438	0.0241141	29										0.165471	0.010421	17
-50	0.239511	0.00586069	47										0.189622	0.0044368	37						0.092625	0.00476417	4		0.0973333	0.0119768	3
-40	0.245717	0.00566098	53						0.24082	0.0565388	5		0.216511	0.00394233	47		0.297833	0.0216417	6		0.0977333	0.00457381	6		0.11275	0.00179035	8
-30	0.256305	0.00545468	59		0.0971286	0.00249826	7		0.241167	0.044079	6		0.268	0.0186494	50		0.380667	0.0467601	6		0.11059	0.00308136	10		0.120318	0.00450137	11
-20	0.281143	0.00757546	63		0.11298	0.00492627	10		0.264143	0.0150909	7		0.275982	0.0116082	56		0.334667	0.0337231	6		0.121294	0.00330192	17		0.142294	0.00734635	17
Parameters from Boltzmann fits and comparison to wildtype
	V1/2 (mV)				k					Current (%WT)			ΔV1/2 (mV)					Δk
KCNQ1	Mean	SE	SD		Mean	SE	SD			Mean			Mean	t value	DOF	P		Mean	t value	DOF	P
WT	28.6	0.7	4.69574		11.4	0.2	1.34164			1			0	0	-	-		0	0	-	-
Y267F	42.1	0.7	3.28329		8.5	0.3	1.40712			0.2			13.5	19.7757	65	<0.001		-2.9	9.62667	65	<0.001
W323A	22.2	0.7	3.28329		15.2	0.8	3.75233			0.254			-6.4	8.65286	65	<0.001		3.8	4.79	65	<0.001
W323L	17.3	1.5	7.5		19	1	5			0.178			-11.3	7.04333	68	<0.001		7.6	7.64	68	<0.001
W323F	29.1	0.5	3.80789		12.8	0.2	1.52315			0.833			0.5	1.49	101	>0.05		1.4	7.04	101	<0.001
K362A	43.3	0.6	3.34066		7.8	0.4	2.22711			0.232			14.7	24.99	74	<0.001		-3.6	8.96	74	<0.001
N365A	43.3	0.6	2.93939		7.8	0.4	1.95959			0.254			14.7	24.99	67	<0.001		-3.6	8.96	67	<0.001
