# Supplementary material for: Allosteric mechanism for KCNE1 modulation of KCNQ1 potassium channel activation
Source: eLife. 2020 Oct 23;9:e57680. doi: 10.7554/eLife.57680 (PMC7584456; doi:10.7554/eLife.57680)
Supplement: Figure 7—figure supplement 1—source data 1. [file elife-57680-fig7-figsupp1-data1.xlsx]

## Sheet: Sheet1
	ΔSASA (%) - RC Model					ΔSASA (%) - AO Model
KCNE1 residue	theta = 0	theta = -90	theta = +90	theta = +/-180		theta = 0	theta = -90	theta = +90	theta = +/-180			ΔV1/2 (mV)		ΔV1/2 (mV)		ΔV1/2 (mV)		ΔV1/2 (mV)
44	39.319	13.17	24.3	53.84		32.485	0	57.29	23.89		A44W	-29.2
45	22.016	58.22	23.42	47.34		4.002	28.34	50.56	41.52		L45W	12.3	L45N	22.7	L45C	12.75	L45C*	2.29
46	61.627	55.67	42.05	8.67		39.612	51.21	0	15.01		Y46W	14	Y46N	-9.6	Y46C	59.91	Y46C*	-0.89
47	71.798	3.57	61.72	21.08		67.99	14.67	22.12	0		V47W	8.9	V47N	-34.5	V47C	-15.5	V47C*	0.21
48	28.128	19.03	52.94	43.66		23.115	0	48.93	32.17		L48W	-1.5	L48N	-7.1	L48C	-35.2	L48C*	-6.18
49	20.278	40.45	17.96	50.19		5.539	27.31	15.86	51.04		M49W	4.3	M49N	2.6	M49C	-3	M49C*	1.94
50	48.881	43.3	20.2	0.32		49.828	29.24	0	8.02		V50W	3.5	V50N	-11.2	V50C	-8.76	V50C*	6.69
51	49.785	0	51.46	8.17		51.331	12.24	31.92	0		L51W	3.6	L51N	-54.5	L51C	-34.35	L51C*	16.53
52	5.196	0	29	30.56		4.914	0	31.03	30.57		G52W	-6.9			G52C	3.58	G52C*	-1.82
53	16.83	47.56	0	40.02		8.346	47.88	6.25	56.02		F53W	-9.8	F53N	-4.8	F53C	9.42	F53C*	-10.74
54	58.38	42.29	14.64	0		54.153	51.28	0	0.02		F54W	-14.2	F54N	-16.2	F54C	-1.87	F54C*	94.6
55	33.306	0	29.76	6.8		34.837	0	23	1.24		G55W	20.8			G55C	0.91	G55C*	61.21
56	0.195	42.76	46.37	74.08		0.231	5.73	54.81	61.95		F56W	-0.3	F56N	-16.2	F56C	-12.17	F56C*	18.81
57	35.779	65.08	0.02	10.84		36.497	54.84	0.56	21.54		F57W	74.8			F57C	27.41	F57C*	15.52
58	53.648	12.24	19.25	9.94		48.429	26.03	7.89	3.75		T58W	-0.1	T58N	11.4	T58C	-62.31	T58C*	17.41
59	14.828	1.12	58.05	48.56		24.713	0.47	40.57	54.55		L59W	-27.6			L59C	14.43	L59C*	3.86
60	2.495	24.11	17.92	35.69		5.935	26.92	37.48	28.62		G60W	-2.5			G60C	-1.77	G60C*	18.95
61	51.887	46.36	0	0		61.626	44.93	1.63	10.04		I61W	16.8			I61C	68.55	I61C*	70.93
62	43.236	0	46.6	27.54		52.539	10.45	48.21	29.99		M62W	6.2	M62N	-9.5	M62C	28.77	M62C*	62.07
63	0.498	32.41	50.95	40.33		8.398	38.34	53.12	59.55		L63W	28.9
64	21.306	25.5	5.47	15.87		29.868	38.87	15.66	40.48		S64W	30.8					* Mutation made in KCNQ1 Cys-less variant
65	58.409	15.13	25.07	4.65		50.026	38.74	32.38	4.85		Y65W	-11.4	Y65N	1.9
66	33.838	3.08	41.11	15.39		44.285	9.9	48.36	54.03		I66W	3.2	I66N	3.7
