# Supplementary material for: Allosteric mechanism for KCNE1 modulation of KCNQ1 potassium channel activation
Source: eLife. 2020 Oct 23;9:e57680. doi: 10.7554/eLife.57680 (PMC7584456; doi:10.7554/eLife.57680)
Supplement: Figure 7—source data 1. [file elife-57680-fig7-data1.xlsx]

## Sheet: Panel A - KCNE1 mutant ephys
	KCNQ1 + KCNE1 WT or mutant
KCNE1 variant	WT				Y46A				Y46L				Y46F				V50A				F56A				F57A				F57L				L59A				L63A				Y65A				Y65L				Y65F
I-V curve
mV	Mean	SE			Mean	SE			Mean	SE			Mean	SE			Mean	SE			Mean	SE			Mean	SE			Mean	SE			Mean	SE			Mean	SE			Mean	SE			Mean	SE			Mean
-80	0.314	0.23			-1.722	0.674			0.248	0.518			0.276	0.5			-3.303	0.695			0.226	0.453			-1.467	0.696			-0.448	0.509			0.353	0.335			0.695	0.58			1.799	0.741			1.623	0.336			0.44
-70	0.422	0.199			-0.794	0.633			0.689	0.464			0.716	0.454			-2.375	0.553			0.648	0.399			-1.113	0.532			0.006	0.432			0.697	0.306			1.387	0.501			1.843	0.698			1.632	0.286			0.086
-60	0.554	0.171			0.989	0.628			0.817	0.373			0.125	0.423			-1.718	0.495			0.404	0.363			-0.239	0.406			0.78	0.331			0.585	0.306			1.815	0.626			1.419	0.543			1.598	0.281			0.288
-50	0.69	0.146			2.485	0.597			1.19	0.336			0.732	0.399			-0.91	0.358			0.273	0.312			-0.494	0.346			1.385	0.372			0.428	0.253			1.676	0.591			1.911	0.71			1.716	0.218			0.455
-40	0.89	0.127			4.22	0.786			0.946	0.305			0.791	0.363			-0.16	0.305			0.738	0.254			0.462	0.315			3.042	0.423			0.66	0.208			2.29	0.587			1.701	0.558			1.249	0.22			0.475
-30	1.464	0.127			6.311	1.084			1.53	0.299			-0.152	0.248			0.565	0.313			0.454	0.254			0.951	0.271			6.287	0.64			0.447	0.192			2.091	0.49			0.862	0.442			1.362	0.182			0.081
-20	2.639	0.178			8.297	1.36			2.083	0.378			0.672	0.337			1.605	0.288			0.875	0.256			1.126	0.338			11.587	1.181			0.63	0.178			3.013	0.53			1.36	0.395			1.358	0.153			0.739
-10	4.999	0.301			10.554	1.621			2.764	0.483			2.458	0.593			3.395	0.414			2.069	0.398			1.698	0.397			20.223	2.034			1.207	0.213			5.231	0.838			1.603	0.618			1.082	0.158			0.992
0	9.452	0.518			12.683	1.925			3.719	0.581			6.727	1.147			5.891	0.642			4.302	0.612			2.673	0.497			31.629	3.226			2.652	0.349			9.466	1.448			4.223	0.968			1.376	0.183			2.445
10	16.833	0.906			14.495	2.307			4.684	0.712			13.117	2.123			9.33	0.965			7.937	1.046			3.247	0.578			46.81	4.806			5.238	0.679			17.205	2.915			7.552	1.504			1.607	0.241			5.582
20	26.964	1.434			16.32	2.626			5.667	0.799			20.264	3.368			13.23	1.412			13.149	1.681			4.848	0.701			64.196	6.469			9.742	1.247			28.485	5.056			12.887	2.259			2.267	0.297			11.226
30	39.061	2.039			17.822	2.917			5.865	0.906			30.187	4.621			18.165	1.998			19.59	2.538			5.961	0.872			82.314	8.105			15.474	2.083			44.072	7.695			19.422	3.116			2.974	0.4			19.282
40	52.377	2.687			18.667	3.147			5.964	0.861			39.746	5.959			22.518	2.611			26.325	3.36			7.095	1.124			101.258	9.879			22.766	3.094			58.397	10.9			26.799	4.198			4.665	0.52			29.503
50	65.966	3.351			20.713	3.397			6.208	0.914			47.996	7.237			28.006	3.297			33.691	4.287			8.379	1.225			119.609	11.335			30.642	4.326			75.753	14.137			34.895	5.453			6.534	0.642			41.416
60	79.552	3.98			21.35	3.658			6.799	0.997			56.189	8.529			32.722	3.988			39.996	5.155			9.032	1.428			134.978	12.602			38.921	5.544			92.093	17.307			44.325	6.845			9.76	0.865			52.475
n =	320				41				52				39				74				42				47				73				46				30				27				66				34
Activation curve
mV	Mean	SE			Mean	SE			Mean	SE			Mean	SE			Mean	SE			Mean	SE			Mean	SE			Mean	SE			Mean	SE			Mean	SE			Mean	SE			Mean	SE			Mean
-80	0.028	0.004			0.155	0.028			0.152	0.041			0.008	0.018			0.049	0.012			0.035	0.011			0.119	0.037			0.028	0.004			0.031	0.015			0.055	0.014			0.072	0.019			0.228	0.04			0.045
-70	0.028	0.004			0.183	0.031			0.12	0.036			0.023	0.013			0.054	0.014			0.033	0.011			0.116	0.05			0.03	0.004			0.044	0.014			0.037	0.009			0.071	0.016			0.18	0.019			0.035
-60	0.029	0.004			0.191	0.047			0.182	0.047			0.031	0.013			0.053	0.012			0.06	0.014			0.112	0.049			0.036	0.005			0.038	0.012			0.051	0.011			0.033	0.015			0.119	0.043			0.006
-50	0.031	0.004			0.284	0.052			0.184	0.044			0.012	0.015			0.061	0.009			0.028	0.021			0.119	0.044			0.054	0.005			0.027	0.015			0.039	0.007			0.049	0.015			0.15	0.042			0.027
-40	0.027	0.004			0.31	0.047			0.26	0.034			0.018	0.019			0.05	0.014			0.035	0.013			0.153	0.045			0.082	0.006			0.028	0.016			0.04	0.009			0.041	0.015			0.07	0.029			0.016
-30	0.038	0.004			0.412	0.049			0.265	0.03			-0.005	0.019			0.074	0.011			0.012	0.017			0.167	0.046			0.129	0.009			-0.001	0.013			0.037	0.01			0.043	0.017			0.08	0.041			0.002
-20	0.063	0.004			0.545	0.052			0.346	0.045			0.033	0.018			0.105	0.014			0.043	0.014			0.246	0.037			0.208	0.013			0.02	0.013			0.055	0.016			0.08	0.019			0.111	0.048			0.018
-10	0.115	0.005			0.624	0.076			0.508	0.048			0.111	0.02			0.145	0.016			0.104	0.021			0.273	0.047			0.315	0.017			0.05	0.017			0.099	0.015			0.107	0.029			0.1	0.049			0.031
0	0.19	0.006			0.734	0.075			0.669	0.027			0.195	0.024			0.22	0.017			0.177	0.023			0.358	0.055			0.439	0.019			0.121	0.018			0.166	0.02			0.162	0.033			0.092	0.047			0.05
10	0.296	0.008			0.824	0.052			0.837	0.043			0.3	0.025			0.361	0.016			0.283	0.024			0.484	0.04			0.583	0.021			0.22	0.023			0.278	0.024			0.243	0.053			0.172	0.047			0.147
20	0.434	0.008			0.853	0.071			0.898	0.036			0.464	0.023			0.484	0.017			0.441	0.019			0.576	0.043			0.715	0.021			0.35	0.025			0.422	0.022			0.334	0.053			0.311	0.057			0.281
30	0.582	0.008			0.93	0.041			0.938	0.037			0.597	0.027			0.635	0.017			0.573	0.02			0.671	0.042			0.827	0.018			0.48	0.026			0.579	0.022			0.51	0.041			0.383	0.044			0.429
40	0.72	0.007			0.959	0.031			1	0.026			0.781	0.029			0.751	0.016			0.714	0.019			0.807	0.03			0.921	0.014			0.66	0.028			0.735	0.017			0.638	0.034			0.591	0.047			0.582
50	0.866	0.005			1	0.009			0.977	0.024			0.911	0.016			0.878	0.01			0.87	0.016			0.931	0.028			0.983	0.01			0.846	0.016			0.867	0.014			0.828	0.025			0.711	0.036			0.799
60	0.988	0.003			0.965	0.032			0.928	0.032			1	0.014			0.988	0.008			0.982	0.015			1	0.027			1	0.011			0.99	0.007			1	0			0.995	0.004			0.994	0.01			0.998
n =	270				14				14				28				43				30				14				58				29				20				18				23				23
Activation time
mV	Mean	SE	n		Mean	SE	n		Mean	SE	n		Mean	SE	n		Mean	SE	n		Mean	SE	n		Mean	SE	n		Mean	SE	n		Mean	SE	n		Mean	SE	n		Mean	SE	n		Mean	SE	n		Mean
0	6.86272	0.816946	56		1.23215	0.0598953	22		4.7	0.835272	15						6.94409	1.59485	21						6.93657	2.95022	3		0.902286	0.0531641	58						7.36368	1.21573	4		5.61997	1.5372	10
10	6.89415	1.00867	82		1.19791	0.0624982	26		2.7115	0.375965	20						8.20413	1.50044	33						4.11737	0.970666	5		0.743204	0.0403449	60		13.3047	2.98657	7		6.395	1.11682	5		5.99763	1.29677	15
20	7.30097	0.73316	133		1.11754	0.0527551	25		1.70623	0.116912	22		6.87161	1.22733	8		7.51394	2.89844	39		12.4026	3.71562	7		4.3883	1.11513	10		0.636126	0.0303534	62		8.63935	1.5118	15		5.68814	0.763521	10		3.29967	0.313652	17
30	5.80509	0.466366	191		1.06904	0.0486101	28		1.45179	0.0706457	24		5.8038	0.777208	20		3.71534	0.467344	44		7.82389	1.32999	17		2.78962	0.469471	13		0.574201	0.0307175	64		6.38962	0.751539	29		5.3633	1.57115	14		2.65722	0.266865	25		3.02294	0.576486	17		13.714
40	4.39711	0.276564	245		1.1476	0.0880657	30		1.32571	0.0867193	24		3.46831	0.349472	32		4.81027	1.60127	47		4.84256	0.604307	26		2.38098	0.363924	15		0.700703	0.180611	65		4.24202	0.564871	36		4.7517	0.965499	21		2.47572	0.272745	28		1.79385	0.116391	39		6.84633
50	3.23831	0.179459	278		1.04912	0.0947939	28		1.18308	0.0655415	26		2.93813	0.286482	36		2.15737	0.183566	47		3.80374	0.407338	33		1.53978	0.163596	17		0.511389	0.0322596	66		3.35981	0.411627	38		2.97507	0.390708	24		2.10467	0.195718	26		2.49867	0.275334	49		5.53789
60	2.54306	0.134146	293		0.988896	0.0424253	27		1.61394	0.202005	32		2.18666	0.242025	35		1.9638	0.196912	48		2.38051	0.140913	35		2.20828	0.742553	16		0.458129	0.0240509	66		2.02731	0.128281	44		2.5724	0.498767	27		2.02744	0.212519	29		2.26542	0.357002	57		5.43011
Deactivation time
mV	Mean	SE	n		Mean	SE	n		Mean	SE	n		Mean	SE	n		Mean	SE	n		Mean	SE	n		Mean	SE	n		Mean	SE	n		Mean	SE	n		Mean	SE	n		Mean	SE	n		Mean	SE	n		Mean
-100	0.136125	0.00222873	261		0.132896	0.00764768	37		0.131636	0.00401665	25		0.115288	0.00332299	24		0.137373	0.006366	42		0.113763	0.00264994	24		0.185462	0.0269062	12		0.132081	0.0041202	68		0.100908	0.00604739	24		0.118131	0.00303565	29		0.082064	0.00326327	25		0.094175	0.00907307	4		0.115511
-90	0.13632	0.00241814	196		0.148712	0.0115834	27		0.146	0.00823024	20		0.121768	0.00466271	19		0.140499	0.00880157	26		0.117692	0.00361866	13		0.172921	0.0260385	10		0.127569	0.00261441	62		0.115146	0.00647818	13		0.123675	0.00444956	24		0.0953167	0.00439415	18		0.104233	0.0158089	3		0.11065
-80	0.125056	0.00482645	53		0.116018	0.0217345	5		0.131333	0.00783014	6						0.204708	0.0405554	4										0.105323	0.00575196	27						0.12525	0.0173799	4		0.108575	0.0117994	8		0.10835	0.03765	2
-70	0.292261	0.0202476	42																										0.306002	0.0410621	35						0.22554	0.0446719	5						0.09155	0.03045	2
-60	0.281533	0.00932241	114														0.361006	0.021566	16										0.237705	0.00935293	61		0.22125	0.082247	4		0.292186	0.0402297	14		0.1217	0.0328876	4						0.231286
-50	0.268917	0.00664471	159		0.418563	0.117032	6						0.24375	0.0290042	8		0.368146	0.0188328	25										0.240003	0.00957305	63		0.186833	0.0274778	6		0.259735	0.0164036	20		0.18359	0.0372866	10						0.22925
-40	0.268631	0.00551442	192		0.40658	0.0761668	5						0.240273	0.0185394	11		0.380534	0.0138529	32		0.27975	0.0391948	4						0.24232	0.00587507	62		0.1865	0.0216539	8		0.309514	0.0329558	21		0.177554	0.0224781	13						0.227667
-30	0.262495	0.00499787	207		0.419958	0.142515	4						0.242077	0.0212127	13		0.383311	0.0149862	34		0.227	0.012509	7						0.25461	0.00588248	64		0.211308	0.0136923	13		0.337805	0.0452704	22		0.172312	0.0119898	16						0.271875
-20	0.26311	0.00512157	211		0.294461	0.0323965	5						0.218308	0.0103245	13		0.380059	0.0164163	36		0.2206	0.00724293	5						0.265979	0.0129045	65		0.223429	0.0143767	14		0.352864	0.0450467	22		0.173778	0.00920839	18						0.25625
Parameters from Boltzmann fits and comparison to wildtype
	V1/2 (mV)				k					Current (%WT)			ΔV1/2 (mV)					Δk
KCNE1	Mean	SE	SD		Mean	SE	SD			Mean	SE		Mean	t value	DOF	P		Mean	t value	DOF	P
WT	24.3998	0.478072	7.85552		13.6032	0.137125	2.25319			1	0.0500272		0	0	-	-		0	0	-	-
Y46A	-11.8828	5.12897	19.1909		15.1102	1.60731	6.01402			0.261986	0.0453297		-36.2826	7.04351	282	<0.001		1.50699	0.93419	282	>0.05
Y46L	-3.25171	3.05398	11.427		15.8064	1.78219	6.66835			0.0854658	0.0125314		-27.6515	8.9453	282	<0.001		2.20321	1.23259	282	>0.05
Y46F	23.2137	1.28408	6.7947		13.5129	0.403782	2.13661			0.706316	0.107219		-1.18608	0.865632	296	>0.05		-0.0903651	0.21191	296	>0.05
V50A	21.9944	0.937549	6.14792		14.4084	0.397543	2.60686			0.411328	0.0501288		-2.40535	2.28558	311	<0.05		0.80515	1.91462	311	>0.05
F56A	24.9116	1.1561	6.33222		13.4623	0.319384	1.74934			0.502769	0.064796		0.511809	0.409104	298	>0.05		-0.140889	0.405346	298	>0.05
F57A	18.6464	2.96732	11.1027		17.1236	1.02848	3.8482			0.113535	0.0179459		-5.75343	1.91425	282	>0.05		3.52035	3.39286	282	<0.001
F57L	6.68873	1.52184	11.59		15.4583	0.275373	2.09717			1.69673	0.158416		-17.7111	11.103	326	<0.001		1.85505	6.03024	326	<0.001
L59A	29.619	1.17782	6.34275		11.9253	0.533838	2.87481			0.489255	0.0696941		5.21917	4.10588	297	<0.001		-1.67795	3.04434	297	<0.01
L63A	25.327	1.26439	5.65451		12.8285	0.407266	1.82135			1.15765	0.217562		0.927209	0.685932	288	>0.05		-0.774672	1.80269	288	>0.05
Y65A	28.6961	2.72752	11.5719		12.0684	0.855386	3.6291			0.557185	0.0860471		4.29632	1.55152	286	>0.05		-1.53478	1.77163	286	>0.05
Y65L	36.6804	1.63111	7.82254		13.1501	1.54211	7.39568			0.122682	0.010876		12.2806	7.22506	291	<0.001		-0.453092	0.292659	291	>0.05
Y65F	33.8391	0.67868	3.25484		11.2476	0.256432	1.2298			0.659631	0.123893		9.43934	11.3706	291	<0.001		-2.35566	8.10081	291	<0.001
I66A	32.5941	0.646881	3.65931		11.2761	0.256783	1.45258			0.976695	0.108525		8.19427	10.1872	300	<0.001		-2.32716	7.99429	300	<0.001
[truncated: 5 more columns]

## Sheet: Panel B - MD dSASA values
KCNQ1-KCNE1 Resting/Closed Model					KCNQ1-KCNE1 Activated/Open Model
	ΔSASA (%)					ΔSASA (%)
KCNE1 residue	Mean	STD			KCNE1 residue	Mean	STD
37	25.071	14.6			37	32.648	14.964
38	19.559	10.873			38	18.296	11.602
39	18.919	11.255			39	10.657	5.422
40	16.551	6.769			40	32.31	8.829
41	27.546	7.83			41	14.934	5.391
42	36.786	8.018			42	5.905	3.346
43	17.92	6.97			43	38.866	5.901
44	39.319	6.08			44	32.485	6.507
45	22.016	5.825			45	4.002	4.326
46	61.627	2.852			46	39.612	4.244
47	71.798	4.254			47	67.99	5.177
48	28.128	5.076			48	23.115	5.516
49	20.278	5.145			49	5.539	4.463
50	48.881	5.187			50	49.828	6.697
51	49.785	2.903			51	51.331	2.941
52	5.196	2.465			52	4.914	2.563
53	16.83	5.983			53	8.346	3.884
54	58.38	3.484			54	54.153	3.804
55	33.306	3.519			55	34.837	3.139
56	0.195	0.529			56	0.231	0.431
57	35.779	4.576			57	36.497	6.69
58	53.648	3.699			58	48.429	3.931
59	14.828	3.902			59	24.713	2.508
60	2.495	2.819			60	5.935	3.594
61	51.887	5.272			61	61.626	6.639
62	43.236	3.622			62	52.539	2.942
63	0.498	1.015			63	8.398	1.954
64	21.306	6.82			64	29.868	4.569
65	58.409	3.568			65	50.026	3.833
66	33.838	9.75			66	44.285	6.931
67	5.042	4.064			67	4.007	3.028
68	20.281	8.05			68	28.553	7.54
69	18.441	8.767			69	27.792	8.367
70	8.956	6.993			70	11.772	6.096
71	12.245	8.758			71	34.069	12.261

## Sheet: Panel C - Q1 activation Vhalf
Voltage dependence of activation of channels formed by co-expression of KCNQ1 with KCNE1 WT or mutants
	V1/2 (mV)				ΔV1/2 (mV)
KCNE1	Mean	SE	SD		Mean	t value	DOF	P
WT	24.3998	0.478072	7.85552		0	0	-	-
Y46A	-11.8828	5.12897	19.1909		-36.2826	7.04351	282	<0.001
Y46L	-3.25171	3.05398	11.427		-27.6515	8.9453	282	<0.001
Y46F	23.2137	1.28408	6.7947		-1.18608	0.865632	296	>0.05
V50A	21.9944	0.937549	6.14792		-2.40535	2.28558	311	<0.05
F56A	24.9116	1.1561	6.33222		0.511809	0.409104	298	>0.05
F57A	18.6464	2.96732	11.1027		-5.75343	1.91425	282	>0.05
F57L	6.68873	1.52184	11.59		-17.7111	11.103	326	<0.001
L59A	29.619	1.17782	6.34275		5.21917	4.10588	297	<0.001
L63A	25.327	1.26439	5.65451		0.927209	0.685932	288	>0.05
Y65A	28.6961	2.72752	11.5719		4.29632	1.55152	286	>0.05
Y65L	36.6804	1.63111	7.82254		12.2806	7.22506	291	<0.001
Y65F	33.8391	0.67868	3.25484		9.43934	11.3706	291	<0.001
I66A	32.5941	0.646881	3.65931		8.19427	10.1872	300	<0.001
V1/2 activation data from Chen & Goldstein, 2007									V1/2 activation data from Wang et al., 2012
										with KCNQ1 WT						with KCNQ1 Cys-free variant
	V1/2 (mV)			ΔV1/2 (mV)						V1/2 (mV)			ΔV1/2 (mV)			V1/2 (mV)			ΔV1/2 (mV)
KCNE1	Mean	SE		Mean					KCNE1	Mean	SE		Mean			Mean	SE		Mean
WT	25.2	1.3		0					WT	64.46	2.7		0			-4.86	3.41		0
A44W	-4	1.3		-29.2					L45C	77.21	2.93		12.75			-2.57	2.56		2.29
L45W	37.5	1.2		12.3					Y46C	124.37	3.63		59.91			-5.75	2.51		-0.89
Y46W	39.2	1.8		14					V47C	48.96	4.12		-15.5			-4.65	3.87		0.21
V47W	34.1	0.9		8.9					L48C	29.26	3.46		-35.2			-11.04	2.16		-6.18
L48W	23.7	0.5		-1.5					M49C	61.46	3.6		-3			-2.92	3.55		1.94
M49W	29.5	0.4		4.3					V50C	55.7	4.02		-8.76			1.83	2.92		6.69
V50W	28.7	0.8		3.5					L51C	30.11	4.89		-34.35			11.67	8.11		16.53
L51W	28.8	1.9		3.6					G52C	68.04	4.43		3.58			-6.68	2.34		-1.82
G52W	18.3	1.4		-6.9					F53C	73.88	3.8		9.42			-15.6	1.8		-10.74
F53W	15.4	1.6		-9.8					F54C	62.59	2.86		-1.87			89.74	5.34		94.6
F54W	11	1.9		-14.2					G55C	65.37	2.3		0.91			56.35	6.12		61.21
G55W	46	1.6		20.8					F56C	52.29	2.61		-12.17			13.95	2.13		18.81
F56W	24.9	0.8		-0.3					F57C	91.87	3.93		27.41			10.66	6.12		15.52
F57W	100	n.d.		74.8					T58C	2.15	3.18		-62.31			12.55	5.49		17.41
T58W	25.1	1.7		-0.1					L59C	78.89	3.95		14.43			-1	3.94		3.86
L59W	-2.4	2		-27.6					G60C	62.69	3.38		-1.77			14.09	3		18.95
G60W	22.7	0.7		-2.5					I61C	133.01	1.74		68.55			66.07	5.25		70.93
I61W	42	1.7		16.8					M62C	93.23	3.06		28.77			57.21	4.31		62.07
M62W	31.4	0.5		6.2
L63W	44.3	1.2		28.9
S64W	56	0.6		30.8
Y65W	13.8	1.1		-11.4
I66W	28.4	1.5		3.2
L45N	47.9	1.1		22.7
Y46N	15.6	0.7		-9.6
V47N	-9.3	1.4		-34.5
L48N	18.1	1.1		-7.1
M49N	27.8	1		2.6
V50N	14	0.8		-11.2
L51N	-29.3	1.4		-54.5
F53N	20.4	1		-4.8
F54N	9	2.2		-16.2
F56N	9	1.5		-16.2
T58N	36.6	2.5		11.4
M62N	15.7	1.5		-9.5
Y65N	27.1	0.7		1.9
I66N	28.9	1.2		3.7
