# Supplementary material for: Allosteric mechanism for KCNE1 modulation of KCNQ1 potassium channel activation
Source: eLife. 2020 Oct 23;9:e57680. doi: 10.7554/eLife.57680 (PMC7584456; doi:10.7554/eLife.57680)
Supplement: Figure 8—source data 1. [file elife-57680-fig8-data1.xlsx]

## Sheet: Panel F - Hbond time series
KCNQ1-KCNE1 Resting/Closed Model MD Simulation									KCNQ1-KCNE1 Activated/Open Model MD Simulation
MD KCNQ1 Y267-KCNE1 T58 H-bond time series (1= H-bond present; 0 = H-bond absent)
Time (ns)	MD1 E1 Molecule2	MD1 E1 Molecule1	MD2 E1 Molecule2	MD2 E1 Molecule1	MD3 E1 Molecule2	MD3 E1 Molecule1			Time (ns)	MD1 E1 Molecule2	MD1 E1 Molecule1	MD2 E1 Molecule2	MD2 E1 Molecule1	MD3 E1 Molecule2	MD3 E1 Molecule1
0	0	0	0	0	1	1			0	0	0	0	0	0	0
0.015	0	0	0	0	1	1			0.015	0	0	0	0	0	0
0.03	1	1	0	1	1	1			0.03	0	0	0	1	0	0
0.045	0	0	0	0	0	1			0.045	0	0	0	1	0	0
0.06	1	0	1	0	0	1			0.06	0	0	0	1	0	0
0.075	0	0	1	0	0	1			0.075	0	0	0	1	0	0
0.09	1	0	1	0	1	1			0.09	0	0	0	1	0	0
0.105	1	0	1	0	0	1			0.105	0	0	0	0	0	0
0.12	0	0	0	1	0	0			0.12	0	0	0	1	0	0
0.135	0	1	1	1	1	0			0.135	0	0	0	0	0	0
0.15	0	1	1	1	1	0			0.15	0	0	0	1	0	0
0.165	0	1	1	0	0	1			0.165	0	0	0	0	0	0
0.18	0	0	1	0	1	1			0.18	0	0	0	1	0	0
0.195	0	1	1	0	1	0			0.195	0	0	0	1	0	0
0.21	0	1	1	0	1	0			0.21	0	0	0	1	0	0
0.225	0	1	1	0	0	0			0.225	0	0	0	0	0	0
0.24	0	1	1	0	0	1			0.24	0	0	0	1	0	0
0.255	1	1	0	0	1	1			0.255	0	0	0	1	0	0
0.27	0	1	1	0	0	1			0.27	0	0	0	1	0	0
0.285	0	1	1	0	1	1			0.285	0	0	0	1	0	0
0.3	0	1	0	0	1	1			0.3	0	0	0	1	0	0
0.315	0	1	0	0	1	0			0.315	0	0	0	1	0	0
0.33	1	1	1	0	1	1			0.33	0	0	0	1	0	0
0.345	1	0	1	0	1	1			0.345	0	0	0	1	0	0
0.36	0	0	1	0	1	0			0.36	0	0	0	1	0	0
0.375	0	0	1	0	1	1			0.375	0	0	0	0	0	0
0.39	1	0	1	0	1	0			0.39	0	0	0	0	0	0
0.405	0	0	1	0	1	1			0.405	0	0	0	1	0	0
0.42	1	0	0	0	1	1			0.42	0	0	0	1	0	0
0.435	0	0	0	0	1	1			0.435	0	0	0	1	0	0
0.45	0	1	0	0	1	1			0.45	0	0	0	0	0	0
0.465	1	0	1	0	1	0			0.465	0	0	0	1	0	0
0.48	1	0	0	1	1	0			0.48	0	0	0	1	0	0
0.495	0	1	1	0	1	0			0.495	0	0	0	0	0	0
0.51	1	1	0	0	1	0			0.51	0	0	0	1	0	0
0.525	0	1	1	0	0	0			0.525	0	0	0	1	0	0
0.54	1	1	0	1	1	1			0.54	0	0	0	0	0	0
0.555	1	1	1	0	1	1			0.555	0	0	0	0	0	0
0.57	0	1	0	0	1	1			0.57	0	0	0	0	0	0
0.585	0	1	0	1	0	1			0.585	0	0	0	0	0	0
0.6	0	0	1	1	1	1			0.6	0	0	0	1	0	0
0.615	0	1	0	1	1	1			0.615	0	0	0	1	0	0
0.63	0	1	1	0	1	0			0.63	0	0	0	0	0	0
0.645	1	1	0	1	0	1			0.645	0	0	0	1	0	0
0.66	1	0	1	0	0	1			0.66	0	0	0	1	0	0
0.675	0	0	0	1	0	1			0.675	0	0	0	1	0	0
0.69	0	1	0	0	1	0			0.69	0	0	0	1	0	0
0.705	0	0	1	0	1	1			0.705	0	0	0	0	0	0
0.72	0	0	0	1	0	1			0.72	0	0	0	1	0	0
0.735	0	1	1	0	0	1			0.735	0	0	0	1	0	0
0.75	0	1	0	1	1	0			0.75	0	0	0	1	0	0
0.765	0	0	1	0	1	0			0.765	0	0	0	1	0	0
0.78	0	0	1	0	1	1			0.78	0	0	0	1	0	0
0.795	0	0	1	0	1	1			0.795	0	0	0	0	0	0
0.81	0	1	0	0	1	1			0.81	0	0	0	1	0	0
0.825	0	1	0	0	1	1			0.825	0	0	0	1	0	0
0.84	0	0	0	0	1	1			0.84	0	0	0	1	0	0
0.855	0	0	0	0	1	1			0.855	0	0	0	1	0	0
0.87	1	0	1	0	0	1			0.87	0	0	0	1	0	0
0.885	0	1	0	0	1	1			0.885	0	0	0	1	0	0
0.9	0	1	1	0	1	0			0.9	0	0	0	1	0	0
0.915	0	1	1	1	1	0			0.915	0	0	0	0	0	0
0.93	0	1	0	0	1	0			0.93	0	0	0	1	0	0
0.945	0	0	1	0	1	0			0.945	0	0	0	1	0	0
0.96	0	1	0	0	1	1			0.96	0	0	0	1	0	0
0.975	0	0	1	0	1	1			0.975	0	0	0	0	0	0
0.99	0	1	1	0	1	1			0.99	0	0	0	1	0	0
1.005	0	1	1	0	1	1			1.005	0	0	0	1	0	0
1.02	1	0	0	0	0	1			1.02	0	0	0	1	0	0
1.035	1	0	1	0	1	1			1.035	0	0	0	1	0	0
1.05	0	1	1	0	0	1			1.05	0	0	0	1	0	0
1.065	0	1	1	0	1	0			1.065	0	0	0	1	0	0
1.08	0	0	1	0	1	1			1.08	0	0	0	0	0	0
1.095	1	1	0	0	1	1			1.095	0	0	0	1	0	0
1.11	0	1	0	1	0	1			1.11	0	0	0	1	0	0
1.125	1	0	1	0	1	1			1.125	0	0	0	1	0	0
1.14	0	1	0	0	1	1			1.14	0	0	0	1	0	0
1.155	0	0	0	0	1	1			1.155	0	0	0	1	0	0
1.17	0	1	1	0	1	1			1.17	0	0	0	0	0	0
1.185	0	0	0	0	1	1			1.185	0	0	0	1	0	0
1.2	1	1	1	1	1	1			1.2	0	0	0	1	0	0
1.215	0	0	1	0	1	1			1.215	0	0	0	0	0	0
1.23	1	0	1	0	1	0			1.23	0	0	0	1	0	0
1.245	0	1	0	1	0	1			1.245	0	0	0	1	0	0
1.26	0	1	1	0	0	1			1.26	0	0	0	1	0	0
1.275	1	1	0	0	1	0			1.275	0	0	0	1	0	0
1.29	0	0	1	0	1	1			1.29	0	0	0	1	0	0
1.305	0	1	1	0	1	1			1.305	0	0	0	1	0	0
1.32	0	0	1	0	0	1			1.32	0	0	0	0	0	0
1.335	0	1	1	0	1	0			1.335	0	0	0	1	0	0
1.35	0	0	1	0	0	1			1.35	0	0	0	1	0	0
1.365	1	0	0	0	1	1			1.365	0	0	0	1	0	0
1.38	0	1	0	0	0	0			1.38	0	0	0	1	0	0
1.395	0	1	1	0	1	0			1.395	0	0	0	1	0	0
1.41	0	1	0	0	1	1			1.41	0	0	0	1	0	0
1.425	0	1	0	0	1	0			1.425	0	0	0	1	0	0
1.44	0	1	1	0	0	1			1.44	0	0	0	1	0	0
1.455	0	0	0	0	0	1			1.455	0	0	0	0	0	0
1.47	1	1	1	0	0	1			1.47	0	0	0	1	0	0
1.485	1	0	1	0	0	0			1.485	0	0	0	0	0	0
1.5	1	1	0	0	1	1			1.5	0	0	0	1	0	0
1.515	0	0	0	0	1	1			1.515	0	0	0	1	0	0
1.53	0	0	0	0	1	0			1.53	0	0	0	1	0	0
1.545	0	0	0	1	0	0			1.545	0	0	0	1	0	0
1.56	0	0	1	0	1	1			1.56	0	0	0	0	0	0
1.575	1	1	1	0	1	1			1.575	0	0	0	1	0	0
1.59	0	0	0	1	1	1			1.59	0	0	0	1	0	0
1.605	0	1	0	0	1	1			1.605	0	0	0	0	0	0
1.62	0	1	0	0	1	1			1.62	0	0	0	1	0	0
1.635	0	0	0	1	0	0			1.635	0	0	0	1	0	0
1.65	0	0	0	0	1	1			1.65	0	0	0	1	0	0
1.665	1	1	1	0	0	1			1.665	0	0	0	1	0	0
1.68	0	0	1	0	1	0			1.68	0	0	0	1	0	0
1.695	0	0	0	1	1	0			1.695	0	0	0	1	0	0
1.71	0	0	0	0	1	0			1.71	0	0	0	1	0	0
1.725	0	1	1	0	1	1			1.725	0	0	0	1	0	0
1.74	1	0	1	0	0	1			1.74	0	0	0	1	0	0
1.755	1	0	1	0	0	1			1.755	0	0	0	1	0	0
1.77	0	0	1	0	1	1			1.77	0	0	0	1	0	0
1.785	0	1	0	1	0	0			1.785	0	0	0	1	0	0
1.8	0	0	1	0	1	1			1.8	0	0	0	1	0	0
1.815	1	1	0	0	1	1			1.815	0	0	0	1	0	0
1.83	0	1	1	0	1	0			1.83	0	0	0	1	0	0
1.845	1	0	1	0	0	0			1.845	0	0	0	1	0	0
1.86	1	1	0	0	1	0			1.86	0	0	0	0	0	0
1.875	1	0	0	0	1	1			1.875	0	0	0	1	0	0
1.89	0	1	0	0	1	1			1.89	0	0	0	1	0	0
1.905	0	1	1	1	1	0			1.905	0	0	0	1	0	0
1.92	1	0	0	0	0	1			1.92	0	0	0	1	0	0
1.935	1	0	0	0	1	1			1.935	0	0	0	1	0	0
1.95	0	1	1	0	1	1			1.95	0	0	0	1	0	0
1.965	0	1	0	0	1	1			1.965	0	0	0	1	0	0
1.98	0	1	1	1	1	0			1.98	0	0	0	0	0	0
1.995	0	1	1	0	0	1			1.995	0	0	0	1	0	0
2.01	0	1	0	1	1	0			2.01	0	0	0	1	0	0
2.025	0	1	0	0	1	1			2.025	0	0	0	1	0	0
2.04	0	0	1	1	1	1			2.04	0	0	0	1	0	0
2.055	0	0	1	0	1	0			2.055	0	0	0	1	0	0
2.07	0	0	0	0	1	0			2.07	0	0	0	1	0	0
2.085	0	1	1	0	1	0			2.085	0	0	0	1	0	0
2.1	1	0	1	0	1	1			2.1	0	0	0	1	0	0
2.115	0	0	1	0	0	1			2.115	0	0	0	1	0	0
2.13	1	0	0	0	1	0			2.13	0	0	0	1	0	0
2.145	0	0	0	0	0	1			2.145	0	0	0	1	0	0
2.16	0	1	0	0	1	1			2.16	0	0	0	1	0	0
2.175	0	0	0	0	0	1			2.175	0	0	0	0	0	0
2.19	1	0	0	0	1	1			2.19	0	0	0	1	0	0
2.205	1	1	1	0	1	1			2.205	0	0	0	1	0	0
2.22	0	0	1	0	1	1			2.22	0	0	0	1	0	0
2.235	1	0	1	0	1	0			2.235	0	0	0	1	0	0
2.25	1	1	0	0	1	0			2.25	0	0	0	1	0	0
2.265	0	0	1	1	0	0			2.265	0	0	0	1	0	0
2.28	0	0	1	0	0	0			2.28	0	0	0	1	0	0
2.295	0	1	1	0	1	1			2.295	0	0	0	0	0	0
2.31	1	0	1	1	1	1			2.31	0	0	0	1	0	0
2.325	0	0	0	0	1	0			2.325	0	0	0	1	0	0
2.34	0	1	0	1	1	0			2.34	0	0	0	0	0	0
2.355	0	1	0	0	1	1			2.355	0	0	0	1	0	0
2.37	0	1	1	0	0	1			2.37	0	0	0	0	0	0
2.385	0	1	1	1	0	1			2.385	0	0	0	1	0	0
2.4	0	1	1	0	1	1			2.4	0	0	0	1	0	0
2.415	1	1	1	0	0	1			2.415	0	0	0	1	0	0
2.43	0	1	1	1	0	1			2.43	0	0	0	1	0	0
2.445	1	0	1	1	0	0			2.445	0	0	0	1	0	0
2.46	1	0	1	1	1	1			2.46	0	0	0	1	0	0
2.475	0	1	1	1	1	1			2.475	0	0	0	1	0	0
2.49	1	1	0	1	0	1			2.49	0	0	0	1	0	0
2.505	0	1	1	0	1	1			2.505	0	0	0	1	0	0
2.52	0	1	1	0	1	0			2.52	0	0	0	1	0	0
2.535	1	0	0	1	1	1			2.535	0	0	0	1	0	0
2.55	1	0	1	1	1	1			2.55	0	0	0	1	0	0
2.565	0	0	0	1	1	0			2.565	0	0	0	1	0	0
2.58	0	1	0	0	1	0			2.58	0	0	0	1	0	0
2.595	0	1	0	0	0	0			2.595	0	0	0	1	0	0
2.61	1	0	0	0	1	0			2.61	0	0	0	1	0	0
2.625	0	0	1	1	1	1			2.625	0	0	0	1	0	0
2.64	0	0	0	1	1	1			2.64	0	0	0	0	0	0
2.655	1	0	0	1	1	1			2.655	0	0	0	1	0	0
2.67	0	0	0	0	0	1			2.67	0	0	0	0	0	0
2.685	0	0	0	1	1	1			2.685	0	0	0	1	0	0
2.7	0	0	1	0	0	1			2.7	0	0	0	1	0	0
2.715	1	0	1	1	1	1			2.715	0	0	0	1	0	0
2.73	0	0	1	0	1	1			2.73	0	0	0	1	0	0
2.745	1	0	1	0	1	1			2.745	0	0	0	1	0	0
2.76	1	0	1	1	1	1			2.76	0	0	0	1	0	0
2.775	0	0	0	0	0	1			2.775	0	0	0	1	0	0
2.79	1	0	1	0	1	1			2.79	0	0	0	1	0	0
2.805	1	0	0	1	1	0			2.805	0	0	0	1	0	0
2.82	0	0	1	0	1	1			2.82	0	0	0	1	0	0
2.835	1	0	1	1	1	1			2.835	0	0	0	1	0	0
2.85	1	0	0	0	0	1			2.85	0	0	0	0	0	0
2.865	0	1	1	0	1	0			2.865	0	0	0	1	0	0
2.88	1	1	0	0	1	0			2.88	0	0	0	1	0	0
2.895	0	0	1	1	1	1			2.895	0	0	0	1	0	0
2.91	0	1	1	0	1	1			2.91	0	0	0	1	0	0
2.925	0	0	0	0	1	0			2.925	0	0	0	1	0	0
2.94	0	0	0	0	1	0			2.94	0	0	0	1	0	0
2.955	0	1	1	0	1	1			2.955	0	0	0	1	0	0
2.97	0	0	0	0	0	0			2.97	0	0	0	1	0	0
2.985	1	0	0	0	1	1			2.985	0	0	0	1	0	0
3	0	0	0	0	1	1			3	0	0	0	1	0	0
3.015	0	1	1	1	1	0			3.015	0	0	0	1	0	0
3.03	1	1	0	0	1	1			3.03	0	0	0	1	0	0
3.045	1	0	1	0	1	1			3.045	0	0	0	1	0	0
3.06	1	1	0	0	1	1			3.06	0	0	0	1	0	0
3.075	0	1	1	0	1	1			3.075	0	0	0	1	0	0
3.09	0	0	0	0	1	1			3.09	0	0	0	1	0	0
3.105	1	1	1	0	1	1			3.105	0	0	0	1	0	0
3.12	1	0	0	0	1	1			3.12	0	0	0	1	0	0
3.135	1	1	0	0	1	1			3.135	0	0	0	1	0	0
3.15	0	0	0	0	0	1			3.15	0	0	0	1	0	0
3.165	1	0	0	1	1	0			3.165	0	0	0	1	0	0
3.18	1	1	0	0	0	1			3.18	0	0	0	1	0	0
3.195	0	1	0	0	1	1			3.195	0	0	0	1	0	0
3.21	1	1	0	1	1	1			3.21	0	0	0	1	0	0
3.225	0	1	0	0	1	1			3.225	0	0	0	1	0	0
3.24	0	1	1	0	1	0			3.24	0	0	0	1	0	0
3.255	1	1	0	0	1	1			3.255	0	0	0	0	0	0
3.27	1	0	1	0	1	0			3.27	0	0	0	1	0	0
3.285	0	1	0	0	1	1			3.285	0	0	0	1	0	0
3.3	0	1	1	0	1	0			3.3	0	0	0	1	0	0
3.315	0	0	0	1	0	0			3.315	0	0	0	1	0	0
3.33	1	0	0	1	1	1			3.33	0	0	0	1	0	0
3.345	1	0	0	1	1	1			3.345	0	0	0	1	0	0
3.36	1	1	0	0	1	0			3.36	0	0	0	1	0	0
3.375	0	1	0	1	1	1			3.375	0	0	0	0	0	0
3.39	0	0	0	0	0	1			3.39	0	0	0	1	0	0
3.405	0	1	1	0	1	1			3.405	0	0	0	0	0	0
3.42	0	1	0	0	1	1			3.42	0	0	0	1	0	0
3.435	1	1	0	0	1	1			3.435	0	0	0	1	0	0
3.45	0	1	0	0	1	1			3.45	0	0	0	1	0	0
3.465	1	0	0	1	1	1			3.465	0	0	0	1	0	0
3.48	0	0	0	0	1	1			3.48	0	0	0	1	0	0
3.495	0	0	1	0	0	1			3.495	0	0	0	1	0	0
3.51	1	1	1	0	1	1			3.51	0	0	0	0	0	0
3.525	1	0	0	1	0	1			3.525	0	0	0	1	0	0
3.54	0	1	0	0	1	0			3.54	0	0	0	1	0	0
3.555	0	0	0	0	1	0			3.555	0	0	0	1	0	0
3.57	1	1	1	1	1	1			3.57	0	0	0	1	0	0
3.585	0	1	0	0	0	0			3.585	0	0	0	1	0	0
3.6	0	1	0	1	1	0			3.6	0	0	0	1	0	0
3.615	0	1	1	0	1	1			3.615	0	0	0	1	0	0
3.63	1	1	0	1	1	0			3.63	0	0	0	1	0	0
3.645	1	0	0	1	1	1			3.645	0	0	0	1	0	0
3.66	1	0	0	1	1	1			3.66	0	0	0	1	0	0
3.675	1	0	0	1	1	1			3.675	0	0	0	1	0	0
3.69	0	0	0	0	1	0			3.69	0	0	0	1	0	0
3.705	0	0	1	0	1	1			3.705	0	0	0	0	0	0
3.72	0	0	0	0	1	1			3.72	0	0	0	1	0	0
3.735	0	0	0	1	1	0			3.735	0	0	0	1	0	0
3.75	1	0	1	1	1	1			3.75	0	0	0	1	0	0
3.765	0	0	0	0	0	1			3.765	0	0	0	1	0	0
3.78	1	0	0	0	1	1			3.78	0	0	0	1	0	0
3.795	1	1	1	0	1	1			3.795	0	0	0	1	0	0
3.81	0	0	1	0	1	1			3.81	0	0	0	1	0	0
3.825	1	1	1	0	0	1			3.825	0	0	0	0	0	0
3.84	0	1	0	0	1	1			3.84	0	0	0	1	0	0
3.855	1	0	1	0	0	1			3.855	0	0	0	1	0	0
3.87	0	1	0	0	1	0			3.87	0	0	0	1	0	0
3.885	1	0	1	0	0	0			3.885	0	0	0	1	0	0
3.9	0	0	0	0	1	1			3.9	0	0	0	1	0	0
3.915	0	0	1	0	0	1			3.915	0	0	0	1	0	0
3.93	0	0	0	0	1	0			3.93	0	0	0	1	0	0
3.945	1	0	0	0	1	1			3.945	0	0	0	1	0	0
3.96	1	0	0	0	1	1			3.96	0	0	0	1	0	0
3.975	0	0	1	0	1	1			3.975	0	0	0	1	0	0
3.99	0	0	0	0	1	1			3.99	0	0	0	0	0	0
4.005	1	0	1	0	1	1			4.005	0	0	0	0	0	0
4.02	0	0	1	0	1	1			4.02	0	0	0	0	0	0
4.035	1	0	1	1	1	1			4.035	0	0	0	1	0	0
4.05	1	0	0	0	1	0			4.05	0	0	0	0	0	0
4.065	0	0	0	0	1	0			4.065	0	0	0	1	0	0
4.08	1	0	0	0	0	1			4.08	0	0	0	1	0	0
4.095	0	0	1	0	0	1			4.095	0	0	0	1	0	0
4.11	0	0	1	0	1	0			4.11	0	0	0	1	0	0
4.125	0	0	0	0	1	1			4.125	0	0	0	1	0	0
4.14	0	0	1	1	1	1			4.14	0	0	0	0	0	0
4.155	0	0	0	0	1	1			4.155	0	0	0	1	0	0
4.17	0	0	1	1	1	0			4.17	0	0	0	1	0	0
4.185	1	0	1	0	1	0			4.185	0	0	0	1	0	0
4.2	1	0	1	0	1	0			4.2	0	0	0	1	0	0
4.215	0	1	0	0	1	1			4.215	0	0	0	1	0	0
4.23	1	1	0	1	1	0			4.23	0	0	0	1	0	0
4.245	0	1	0	0	1	1			4.245	0	0	0	1	0	0
4.26	1	1	0	0	0	1			4.26	0	0	0	1	0	0
4.275	0	0	1	0	1	0			4.275	0	0	0	1	0	0
4.29	0	0	1	1	1	1			4.29	0	0	0	1	0	0
4.305	0	1	0	0	1	1			4.305	0	0	0	1	0	0
4.32	0	0	1	0	1	1			4.32	0	0	0	1	0	0
4.335	0	1	0	0	1	1			4.335	0	0	0	1	0	0
4.35	1	1	1	0	1	0			4.35	0	0	0	1	0	0
4.365	0	1	1	0	1	0			4.365	0	0	0	1	0	0
4.38	1	0	1	0	1	1			4.38	0	0	0	1	0	0
4.395	1	0	0	0	1	1			4.395	0	0	0	0	0	0
4.41	0	1	1	0	1	0			4.41	0	0	0	0	0	0
4.425	0	1	1	0	1	0			4.425	0	0	0	1	0	0
4.44	0	0	1	0	1	1			4.44	0	0	0	0	0	0
4.455	0	1	1	0	1	0			4.455	0	0	0	0	0	0
4.47	0	1	0	0	1	1			4.47	0	0	0	0	0	0
4.485	0	0	1	0	1	1			4.485	0	0	0	1	0	0
4.5	1	1	1	0	1	1			4.5	0	0	0	0	0	0
4.515	0	0	1	0	0	1			4.515	0	0	0	1	0	0
4.53	1	1	0	0	1	1			4.53	0	0	0	0	0	0
4.545	1	1	1	1	1	0			4.545	0	0	0	1	0	0
4.56	1	0	1	0	0	1			4.56	0	0	0	1	0	0
4.575	1	1	1	1	1	1			4.575	0	0	0	1	0	0
4.59	0	0	1	0	1	0			4.59	0	0	0	1	0	0
4.605	0	1	1	1	0	1			4.605	0	0	0	1	0	0
4.62	0	1	1	1	1	1			4.62	0	0	0	1	0	0
4.635	0	0	0	0	0	0			4.635	0	0	0	1	0	0
4.65	0	0	1	0	1	1			4.65	0	0	0	1	0	0
4.665	0	1	1	1	1	1			4.665	0	0	0	1	0	0
4.68	0	1	0	1	1	0			4.68	0	0	0	1	0	0
4.695	0	0	1	0	1	1			4.695	0	0	0	1	0	0
4.71	0	0	0	0	1	1			4.71	0	0	0	0	0	0
4.725	0	0	0	1	0	1			4.725	0	0	0	0	0	0
4.74	0	0	0	1	1	1			4.74	0	0	0	1	0	0
4.755	0	1	0	0	1	1			4.755	0	0	0	1	0	0
4.77	1	1	0	0	0	0			4.77	0	0	0	0	0	0
4.785	1	1	0	0	1	0			4.785	0	0	0	1	0	0
4.8	1	0	1	1	1	1			4.8	0	0	0	1	0	0
4.815	0	0	0	0	0	1			4.815	0	0	0	1	0	0
4.83	0	0	0	1	1	1			4.83	0	0	0	1	0	0
4.845	0	1	0	0	1	0			4.845	0	0	0	1	0	0
4.86	0	0	1	0	1	0			4.86	0	0	0	0	0	0
4.875	1	0	0	1	1	1			4.875	0	0	0	1	0	0
4.89	0	0	0	0	1	0			4.89	0	0	0	1	0	0
4.905	1	1	1	1	1	1			4.905	0	0	0	1	0	0
4.92	0	0	1	0	1	1			4.92	0	0	0	1	0	0
4.935	1	0	0	0	0	0			4.935	0	0	0	1	0	0
4.95	0	1	0	1	0	1			4.95	0	0	0	1	0	0
4.965	1	1	1	1	0	1			4.965	0	0	0	1	0	0
4.98	1	0	0	1	1	0			4.98	0	0	0	1	0	0
4.995	1	1	0	0	0	1			4.995	0	0	0	0	0	0
5.01	0	0	1	1	1	1			5.01	0	0	0	1	0	0
5.025	0	1	0	0	1	1			5.025	0	0	0	1	0	0
5.04	1	0	1	0	1	1			5.04	0	0	0	1	0	0
5.055	1	0	1	0	0	0			5.055	0	0	0	0	0	0
5.07	1	1	0	0	0	1			5.07	0	0	0	1	0	0
5.085	0	0	1	0	1	0			5.085	0	0	0	1	0	0
5.1	0	1	1	0	0	1			5.1	0	0	0	1	0	0
5.115	1	1	0	1	0	1			5.115	0	0	0	1	0	0
5.13	0	0	0	0	0	1			5.13	0	0	0	1	0	0
5.145	1	0	0	1	1	1			5.145	0	0	0	1	0	0
5.16	1	0	0	1	1	1			5.16	0	0	0	1	0	0
5.175	1	1	1	0	0	1			5.175	0	0	0	1	0	0
5.19	0	0	0	0	1	1			5.19	0	0	0	1	0	0
5.205	1	1	0	1	0	1			5.205	0	0	0	1	0	0
5.22	0	0	0	0	1	1			5.22	0	0	0	1	0	0
5.235	0	1	0	0	1	1			5.235	0	0	0	1	0	0
5.25	1	1	0	1	0	1			5.25	0	0	0	1	0	0
5.265	1	0	0	0	0	0			5.265	0	0	0	1	0	0
5.28	1	1	0	0	0	1			5.28	0	0	0	1	0	0
5.295	0	1	1	0	1	0			5.295	0	0	0	1	0	0
5.31	0	0	0	0	1	0			5.31	0	0	0	1	0	0
5.325	0	0	0	1	1	1			5.325	0	0	0	1	0	0
5.34	0	1	1	0	0	1			5.34	0	0	0	0	0	0
5.355	1	1	1	0	1	1			5.355	0	0	0	1	0	0
5.37	0	1	0	0	1	1			5.37	0	0	0	1	0	0
5.385	1	0	0	1	1	1			5.385	0	0	0	0	0	0
5.4	1	0	0	1	0	0			5.4	0	0	0	1	0	0
5.415	0	0	0	1	1	1			5.415	0	0	0	1	0	0
5.43	1	1	0	1	1	1			5.43	0	0	0	1	0	0
5.445	1	0	0	1	1	1			5.445	0	0	0	1	0	0
5.46	1	1	1	1	1	1			5.46	0	0	0	1	0	0
5.475	1	0	0	0	1	1			5.475	0	0	0	1	0	0
5.49	0	1	0	1	1	0			5.49	0	0	0	1	0	0
5.505	0	0	1	1	0	1			5.505	0	0	0	1	0	0
5.52	1	1	0	0	1	1			5.52	0	0	0	1	0	0
5.535	1	0	0	0	0	1			5.535	0	0	0	0	0	0
5.55	1	1	0	0	1	1			5.55	0	0	0	1	0	0
5.565	0	1	1	1	1	1			5.565	0	0	0	1	0	0
5.58	1	1	1	1	1	1			5.58	0	0	0	1	0	0
5.595	0	0	1	0	1	1			5.595	0	0	0	1	0	0
5.61	1	0	0	1	1	0			5.61	0	0	0	0	0	0
5.625	0	0	0	0	1	0			5.625	0	0	0	1	0	0
5.64	0	1	0	0	0	1			5.64	0	0	0	1	0	0
5.655	1	1	0	0	1	1			5.655	0	0	0	0	0	0
5.67	1	1	0	0	1	1			5.67	0	0	0	1	0	0
5.685	1	1	1	0	1	1			5.685	0	0	0	1	0	0
5.7	0	1	0	1	1	1			5.7	0	0	0	1	0	0
5.715	0	1	0	1	1	0			5.715	0	0	0	1	0	0
5.73	1	0	0	0	0	0			5.73	0	0	0	1	0	0
5.745	1	0	0	1	0	0			5.745	0	0	0	1	0	0
5.76	1	0	0	0	1	1			5.76	0	0	0	1	0	0
5.775	0	1	1	0	1	0			5.775	0	0	0	0	0	0
5.79	0	1	0	0	0	1			5.79	0	0	0	1	0	0
5.805	0	0	0	0	1	1			5.805	0	0	0	1	0	0
5.82	1	1	0	0	1	1			5.82	0	0	0	1	0	0
5.835	1	0	0	0	0	1			5.835	0	0	0	1	0	0
5.85	0	0	0	1	0	0			5.85	0	0	0	1	0	0
5.865	1	0	0	0	1	1			5.865	0	0	0	1	0	0
5.88	1	1	1	0	1	1			5.88	0	0	0	0	0	0
5.895	1	0	0	0	1	1			5.895	0	0	0	1	0	0
5.91	1	0	0	0	1	0			5.91	0	0	0	1	0	0
5.925	1	1	1	0	1	1			5.925	0	0	0	1	0	0
5.94	1	1	1	0	0	0			5.94	0	0	0	1	0	0
5.955	1	1	0	0	1	1			5.955	0	0	0	1	0	0
5.97	0	1	0	0	1	1			5.97	0	0	0	1	0	0
5.985	1	0	0	0	0	0			5.985	0	0	0	1	0	0
6	0	1	1	0	1	1			6	0	0	0	1	0	0
6.015	0	1	1	0	1	1			6.015	0	0	0	1	0	0
6.03	1	0	0	0	0	0			6.03	0	0	0	1	0	0
6.045	1	1	1	0	1	1			6.045	0	0	0	1	0	0
6.06	1	1	0	0	1	1			6.06	0	0	0	1	0	0
6.075	0	1	0	1	1	0			6.075	0	0	0	1	0	0
6.09	0	0	1	0	1	1			6.09	0	0	0	1	0	0
6.105	0	0	0	0	1	1			6.105	0	0	0	1	0	0
6.12	1	0	0	0	0	1			6.12	0	1	0	1	0	0
6.135	0	0	1	1	0	0			6.135	0	0	0	1	0	0
6.15	1	1	0	1	1	1			6.15	0	0	0	0	0	0
6.165	1	1	0	1	0	1			6.165	0	0	0	1	0	0
6.18	1	0	0	1	1	0			6.18	0	0	0	1	0	0
6.195	1	0	1	1	1	1			6.195	0	1	0	1	0	0
6.21	0	1	0	1	1	1			6.21	0	1	0	1	0	0
6.225	0	0	0	1	1	1			6.225	0	0	0	1	0	0
6.24	0	1	1	1	0	0			6.24	0	0	0	1	0	0
6.255	0	1	1	1	0	0			6.255	0	0	0	1	0	0
6.27	1	0	1	0	0	1			6.27	0	0	0	1	0	0
6.285	0	0	1	1	1	1			6.285	0	0	0	1	0	0
6.3	0	1	1	0	0	0			6.3	0	0	0	1	0	0
6.315	0	0	0	1	0	0			6.315	0	0	0	1	0	0
6.33	1	0	0	0	1	1			6.33	0	0	0	1	0	0
6.345	1	0	1	1	1	1			6.345	0	0	0	1	0	0
6.36	0	1	1	0	1	0			6.36	0	0	0	1	0	0
6.375	1	0	1	1	1	1			6.375	0	0	0	1	0	0
6.39	1	1	1	1	0	1			6.39	0	0	0	1	0	0
6.405	0	0	0	1	0	0			6.405	0	0	0	1	0	0
6.42	1	1	1	1	1	0			6.42	0	0	0	1	0	0
6.435	0	1	1	0	0	1			6.435	0	0	0	1	0	0
6.45	1	1	1	1	1	1			6.45	0	0	0	0	0	0
6.465	0	1	0	0	1	1			6.465	0	0	0	1	0	0
6.48	0	0	0	0	1	0			6.48	0	0	0	1	0	0
6.495	0	1	0	0	1	0			6.495	0	0	0	1	0	0
6.51	1	0	0	0	1	0			6.51	0	0	0	1	0	0
6.525	1	1	0	1	1	1			6.525	0	0	0	1	0	0
6.54	1	1	1	1	0	0			6.54	0	0	0	1	0	0
6.555	1	0	0	0	0	1			6.555	0	0	0	1	0	0
6.57	1	1	1	1	0	0			6.57	0	0	0	1	0	0
6.585	0	1	1	0	0	1			6.585	0	0	0	0	0	0
6.6	1	1	1	0	0	0			6.6	0	0	0	1	0	0
6.615	0	1	0	1	1	1			6.615	0	0	0	1	0	0
6.63	1	1	0	1	1	1			6.63	0	0	0	1	0	0
6.645	1	1	0	0	0	1			6.645	0	0	0	1	0	0
6.66	0	1	1	0	1	1			6.66	0	0	0	0	0	0
6.675	0	1	0	1	0	0			6.675	0	0	0	1	0	0
6.69	0	1	1	1	1	1			6.69	0	0	0	0	0	0
6.705	0	1	0	0	1	1			6.705	0	0	0	1	0	0
6.72	0	0	1	0	1	1			6.72	0	0	0	1	0	0
6.735	1	1	1	1	1	1			6.735	0	0	0	1	0	0
6.75	0	1	0	1	0	1			6.75	0	0	0	1	0	0
6.765	0	1	1	0	1	1			6.765	0	0	0	1	0	0
6.78	1	1	0	0	1	1			6.78	0	0	0	1	0	0
6.795	1	1	0	1	1	0			6.795	0	0	0	1	0	0
6.81	0	1	0	1	1	1			6.81	0	0	0	1	0	0
6.825	0	1	0	1	0	1			6.825	0	0	0	1	0	0
6.84	1	1	0	1	1	1			6.84	0	0	0	1	0	0
6.855	1	1	1	0	0	0			6.855	0	0	0	1	0	0
6.87	1	1	0	1	1	0			6.87	0	0	0	1	0	0
6.885	1	0	1	1	0	0			6.885	0	0	0	1	0	0
6.9	1	1	0	1	0	1			6.9	0	0	0	1	0	0
6.915	1	1	1	1	0	0			6.915	0	0	0	1	0	0
6.93	0	1	0	1	1	1			6.93	0	0	0	1	0	0
6.945	0	1	1	1	1	0			6.945	0	0	0	1	0	0
6.96	0	0	0	0	1	1			6.96	0	0	0	1	0	0
6.975	0	0	0	1	0	1			6.975	0	0	0	1	0	0
6.99	0	0	1	0	1	0			6.99	0	0	0	1	0	0
7.005	1	1	1	0	0	0			7.005	0	0	0	1	0	0
7.02	0	0	0	0	1	1			7.02	0	0	0	1	0	0
7.035	1	0	1	0	1	1			7.035	0	0	0	1	0	0
7.05	0	0	0	1	1	1			7.05	0	0	0	1	0	0
7.065	0	1	0	1	1	1			7.065	0	0	0	1	0	0
7.08	0	1	0	1	1	0			7.08	0	0	0	1	0	0
7.095	1	1	1	1	0	1			7.095	0	0	0	1	0	0
7.11	1	1	0	0	1	1			7.11	0	0	0	0	0	0
7.125	1	1	1	1	1	0			7.125	0	0	0	1	0	0
7.14	0	1	0	0	1	1			7.14	0	0	0	1	0	0
7.155	0	0	1	1	1	1			7.155	0	0	0	0	0	0
7.17	1	1	0	1	1	0			7.17	0	0	0	1	0	0
7.185	1	1	1	1	1	1			7.185	0	0	0	1	0	0
7.2	1	0	0	1	0	0			7.2	0	0	0	1	0	0
7.215	1	1	0	1	0	0			7.215	0	0	0	1	0	0
7.23	0	1	0	1	0	1			7.23	0	0	0	1	0	0
7.245	1	0	1	1	0	1			7.245	0	0	0	1	0	0
7.26	1	1	1	0	1	0			7.26	0	0	0	1	0	0
7.275	1	0	1	1	1	1			7.275	0	0	0	1	0	0
7.29	1	1	1	0	1	0			7.29	0	0	0	1	0	0
7.305	1	1	0	1	0	1			7.305	0	0	0	1	0	0
7.32	1	0	0	1	1	0			7.32	0	0	0	1	0	0
7.335	1	0	1	1	0	0			7.335	0	0	0	1	0	0
7.35	0	0	0	1	0	0			7.35	0	0	0	1	0	0
7.365	0	1	1	0	0	1			7.365	0	0	0	0	0	0
7.38	1	1	0	1	0	1			7.38	0	0	0	1	0	0
7.395	1	0	0	1	0	1			7.395	0	0	0	1	0	0
7.41	1	1	0	0	0	1			7.41	0	0	0	1	0	0
7.425	1	1	0	1	0	1			7.425	0	0	0	1	0	0
7.44	0	0	0	1	0	1			7.44	0	0	0	1	0	0
7.455	0	1	0	1	0	1			7.455	0	0	0	1	0	0
7.47	1	0	0	0	0	1			7.47	0	0	0	1	0	0
7.485	1	1	0	1	0	0			7.485	0	0	0	0	0	0
7.5	1	1	1	0	0	1			7.5	0	0	0	1	0	0
7.515	0	0	1	0	0	1			7.515	0	0	0	1	0	0
7.53	1	0	0	0	0	1			7.53	0	0	0	1	0	0
7.545	1	0	0	1	0	1			7.545	0	0	0	1	0	0
7.56	0	0	0	0	0	1			7.56	0	0	0	1	0	0
7.575	1	0	0	1	0	1			7.575	0	0	0	1	0	0
7.59	1	1	0	0	0	0			7.59	0	0	0	1	0	0
7.605	1	1	0	0	0	1			7.605	0	0	0	1	0	0
7.62	0	1	0	0	0	0			7.62	0	0	0	1	0	0
7.635	1	0	1	0	0	1			7.635	0	0	0	1	0	0
7.65	0	1	0	1	0	1			7.65	0	0	0	1	0	0
7.665	1	1	1	0	1	0			7.665	0	0	0	1	0	0
7.68	1	0	1	1	1	1			7.68	0	0	0	1	0	0
7.695	0	1	1	1	0	1			7.695	0	0	0	0	0	0
7.71	1	0	0	0	0	1			7.71	0	0	0	1	0	0
7.725	1	0	0	1	1	0			7.725	0	0	0	1	0	0
7.74	0	1	0	1	1	0			7.74	0	0	0	0	0	0
7.755	1	1	0	1	1	1			7.755	0	0	0	1	0	0
7.77	0	0	0	0	1	1			7.77	0	0	0	1	0	0
7.785	1	0	0	1	0	0			7.785	0	0	0	1	0	0
7.8	1	0	0	0	0	0			7.8	0	0	0	1	0	0
7.815	1	0	0	1	0	0			7.815	0	0	0	1	0	0
7.83	1	0	1	0	0	1			7.83	0	0	0	0	0	0
7.845	0	1	0	1	0	0			7.845	0	0	0	1	0	0
7.86	1	1	0	0	0	1			7.86	0	0	0	0	0	0
7.875	1	1	1	1	0	0			7.875	0	0	0	1	0	0
7.89	0	1	0	0	0	0			7.89	0	0	0	0	0	0
7.905	0	1	0	0	0	1			7.905	0	0	0	1	0	0
7.92	0	0	0	0	1	1			7.92	0	0	0	1	0	0
7.935	1	1	0	1	1	1			7.935	0	0	0	1	0	0
7.95	0	0	1	1	0	1			7.95	0	0	0	1	0	0
7.965	1	1	1	0	1	0			7.965	0	0	0	1	0	0
7.98	1	0	1	0	1	0			7.98	0	0	0	1	0	0
7.995	1	0	0	0	1	0			7.995	0	0	0	0	0	0
8.01	0	1	0	0	1	0			8.01	0	0	0	1	0	0
8.025	0	1	0	0	0	1			8.025	0	0	0	1	0	0
8.04	1	1	0	1	0	1			8.04	0	0	0	0	0	0
8.055	1	1	1	0	1	0			8.055	0	0	0	0	0	0
8.07	1	1	0	0	0	1			8.07	0	0	0	1	0	0
8.085	1	0	1	0	0	1			8.085	0	0	0	1	0	0
8.1	1	0	1	0	1	0			8.1	0	0	0	1	0	0
8.115	1	1	1	0	0	0			8.115	0	0	0	0	0	0
8.13	1	1	0	0	1	1			8.13	0	0	0	1	0	0
8.145	1	0	0	0	1	0			8.145	0	0	0	1	0	0
8.16	1	0	1	1	0	1			8.16	0	0	0	0	0	0
8.175	1	1	1	1	1	1			8.175	0	0	0	1	0	0
8.19	0	1	1	0	0	0			8.19	0	0	0	1	0	0
8.205	1	1	0	0	0	0			8.205	0	0	0	1	0	0
8.22	0	0	1	0	0	0			8.22	0	0	0	1	0	0
8.235	0	0	1	1	0	1			8.235	0	0	0	0	0	0
8.25	1	0	0	0	0	1			8.25	0	0	0	1	0	0
8.265	1	1	0	0	0	1			8.265	0	0	0	1	0	0
8.28	1	1	0	0	0	1			8.28	0	0	0	1	0	0
8.295	0	0	1	1	0	1			8.295	0	0	0	0	0	0
8.31	1	1	1	1	0	0			8.31	0	0	0	1	0	0
8.325	1	0	0	1	0	1			8.325	0	0	0	1	0	0
8.34	1	1	0	1	0	0			8.34	0	0	0	1	0	0
8.355	0	0	0	1	0	0			8.355	0	0	0	1	0	0
8.37	0	1	0	0	0	1			8.37	0	0	0	1	0	0
8.385	1	1	1	0	0	0			8.385	0	0	0	0	0	0
8.4	1	1	0	0	0	1			8.4	0	0	0	1	0	0
8.415	1	1	0	0	0	0			8.415	0	0	0	0	0	0
8.43	1	1	1	0	0	1			8.43	0	0	0	1	0	0
8.445	0	1	0	1	0	0			8.445	0	0	0	0	0	0
8.46	1	1	0	0	0	0			8.46	0	0	0	1	0	0
8.475	1	1	1	1	0	1			8.475	0	0	0	1	0	0
8.49	0	1	1	1	0	1			8.49	0	0	0	1	0	0
8.505	1	1	0	0	0	1			8.505	0	0	0	0	0	0
8.52	0	1	1	0	0	1			8.52	0	0	0	1	0	0
8.535	0	1	0	0	0	1			8.535	0	0	0	1	0	0
8.55	0	1	0	0	0	1			8.55	0	0	0	1	0	0
8.565	1	1	0	0	0	1			8.565	0	0	0	1	0	0
8.58	0	0	0	0	0	1			8.58	0	0	0	1	0	0
8.595	1	1	1	1	0	1			8.595	0	0	0	1	0	0
8.61	1	1	0	0	0	1			8.61	0	0	0	1	0	0
8.625	1	0	0	0	0	0			8.625	0	0	0	1	0	0
8.64	1	0	1	0	0	0			8.64	0	0	0	1	0	0
8.655	1	0	0	1	0	0			8.655	0	0	0	1	0	0
8.67	1	0	0	1	0	1			8.67	0	0	0	1	0	0
8.685	0	1	0	0	0	1			8.685	0	0	0	1	0	0
8.7	0	0	0	0	0	1			8.7	0	0	0	1	0	0
8.715	1	0	0	0	0	1			8.715	0	0	0	0	0	0
8.73	1	0	1	0	0	0			8.73	0	0	0	0	0	0
8.745	1	1	0	0	0	1			8.745	0	0	0	0	0	0
8.76	0	0	1	0	0	1			8.76	0	0	0	1	0	0
8.775	1	0	0	0	0	0			8.775	0	0	0	1	0	0
8.79	0	1	0	0	0	1			8.79	0	0	0	1	0	0
8.805	1	1	1	0	0	1			8.805	0	0	0	1	0	0
8.82	1	1	0	0	0	1			8.82	0	0	0	1	0	0
8.835	1	1	0	1	0	0			8.835	0	0	0	1	0	0
8.85	1	0	1	0	0	1			8.85	0	0	0	1	0	0
8.865	1	0	1	1	0	1			8.865	0	0	0	1	0	0
8.88	0	1	0	1	0	1			8.88	0	0	0	1	0	0
8.895	1	0	0	0	0	0			8.895	0	0	0	1	0	0
8.91	1	0	0	1	0	0			8.91	0	0	0	1	0	0
8.925	1	1	1	1	0	0			8.925	0	0	0	1	0	0
8.94	1	0	0	1	0	1			8.94	0	0	0	1	0	0
8.955	0	1	0	0	0	1			8.955	0	0	0	1	0	0
8.97	1	0	0	0	0	1			8.97	0	0	0	1	0	0
8.985	0	0	1	0	0	1			8.985	0	0	0	1	0	0
9	0	1	1	1	0	0			9	0	0	0	1	0	0
9.015	1	0	0	0	0	0			9.015	0	0	0	1	0	0
9.03	0	0	0	0	0	1			9.03	0	0	0	0	0	0
9.045	0	1	0	0	0	1			9.045	0	0	0	1	0	0
9.06	0	1	1	0	0	1			9.06	0	0	0	0	0	0
9.075	1	1	0	1	0	1			9.075	0	0	0	0	0	0
9.09	1	1	0	0	0	0			9.09	0	0	0	1	0	0
9.105	1	1	0	1	0	1			9.105	0	0	0	0	0	0
9.12	0	0	0	0	0	0			9.12	0	0	0	1	0	0
9.135	0	0	0	0	0	1			9.135	0	0	0	1	0	0
9.15	0	0	1	0	0	1			9.15	0	0	0	1	0	0
9.165	1	0	1	0	0	1			9.165	0	0	0	1	0	0
9.18	0	1	0	0	0	1			9.18	0	0	0	1	0	0
9.195	1	1	0	0	0	1			9.195	0	0	0	1	0	0
9.21	0	1	0	0	0	1			9.21	0	0	0	1	0	0
9.225	0	1	0	1	0	1			9.225	0	0	0	0	0	0
9.24	1	0	0	0	0	1			9.24	0	0	0	1	0	0
9.255	1	1	0	0	0	1			9.255	0	0	0	1	0	0
9.27	1	1	0	1	0	1			9.27	0	0	0	1	0	0
9.285	1	0	1	0	0	1			9.285	0	0	0	1	0	0
9.3	1	1	0	0	0	1			9.3	0	0	0	1	0	0
9.315	1	1	0	1	0	1			9.315	0	0	0	1	0	0
9.33	1	1	0	0	0	0			9.33	0	0	0	1	0	0
9.345	0	1	0	0	0	0			9.345	0	0	0	0	0	0
9.36	0	0	0	1	0	1			9.36	0	0	0	1	0	0
9.375	0	0	1	0	0	1			9.375	0	0	0	0	0	0
9.39	1	0	0	0	0	1			9.39	0	0	0	1	0	0
9.405	1	0	0	0	0	1			9.405	0	0	0	1	0	0
9.42	0	1	0	1	0	0			9.42	0	0	0	1	0	0
9.435	0	1	1	1	0	1			9.435	0	0	0	1	0	0
9.45	0	1	1	0	0	1			9.45	0	0	0	1	0	0
9.465	0	0	1	1	0	0			9.465	0	0	0	1	0	0
9.48	1	1	0	1	0	1			9.48	0	0	0	0	0	0
9.495	1	1	1	0	0	0			9.495	0	0	0	1	0	0
9.51	1	0	0	1	0	1			9.51	0	0	0	1	0	0
9.525	1	1	0	0	0	1			9.525	0	0	0	1	0	0
9.54	0	1	0	1	0	1			9.54	0	0	0	1	0	0
9.555	1	0	1	1	0	1			9.555	0	0	0	1	0	0
9.57	1	1	0	0	0	1			9.57	0	0	0	0	0	0
9.585	0	1	0	0	0	1			9.585	0	0	0	1	0	0
9.6	1	0	0	0	0	1			9.6	0	0	0	1	0	0
9.615	1	1	1	0	0	0			9.615	0	0	0	1	0	0
9.63	1	1	0	1	0	0			9.63	0	0	0	1	0	0
9.645	0	0	0	0	0	1			9.645	0	0	0	1	0	0
9.66	1	1	1	0	0	1			9.66	0	0	0	1	0	0
9.675	1	0	0	0	0	0			9.675	0	0	0	0	0	0
9.69	1	0	0	0	0	0			9.69	0	0	0	1	0	0
9.705	1	0	0	0	0	1			9.705	0	0	0	1	0	0
9.72	0	1	0	1	0	0			9.72	0	0	0	1	0	0
9.735	0	1	1	0	0	1			9.735	0	0	0	1	0	0
9.75	0	1	0	1	0	0			9.75	0	0	0	1	0	0
9.765	1	1	0	1	0	1			9.765	0	0	0	0	0	0
9.78	0	0	0	1	0	1			9.78	0	0	0	1	0	0
9.795	1	0	0	0	0	0			9.795	0	0	0	1	0	0
9.81	0	1	0	1	0	0			9.81	0	0	0	0	0	0
9.825	0	1	1	1	0	1			9.825	0	0	0	1	0	0
9.84	1	1	0	0	0	1			9.84	0	0	0	1	0	0
9.855	1	1	0	0	0	1			9.855	0	0	0	0	0	0
9.87	0	1	0	1	0	1			9.87	0	0	0	1	0	0
9.885	0	1	1	1	0	1			9.885	0	0	0	1	0	0
9.9	1	1	0	1	0	1			9.9	0	0	0	1	0	0
9.915	1	0	0	1	0	0			9.915	0	0	0	1	0	0
9.93	0	1	1	0	0	0			9.93	0	0	0	1	0	0
9.945	0	0	1	1	0	1			9.945	0	0	0	1	0	0
9.96	1	1	1	1	0	1			9.96	0	0	0	1	0	0
9.975	1	0	0	1	0	1			9.975	0	0	0	1	0	0
9.99	0	1	0	1	0	1			9.99	0	0	0	1	0	0
10.01	0	0	0	0	0	0			10.01	0	0	0	1	0	0
10.02	1	1	0	0	0	1			10.02	0	0	0	1	0	0
10.04	1	0	0	0	0	0			10.04	0	0	0	1	0	0
10.05	0	1	0	1	0	1			10.05	0	0	0	1	0	0
10.06	0	1	1	0	0	1			10.06	0	0	0	1	0	0
10.08	1	1	1	0	0	1			10.08	0	0	0	1	0	0
10.1	0	0	0	1	0	1			10.1	0	0	0	1	0	0
10.11	0	0	0	0	0	0			10.11	0	0	0	1	0	0
10.12	1	1	0	0	0	1			10.12	0	0	0	1	0	0
10.14	0	0	0	0	0	1			10.14	0	0	0	1	0	0
10.15	0	1	0	0	0	1			10.15	0	0	0	1	0	0
10.17	0	0	0	0	0	1			10.17	0	0	0	1	0	0
10.19	0	1	0	0	0	0			10.19	0	0	0	1	0	0
10.2	0	0	0	0	0	1			10.2	0	0	0	1	0	0
10.21	0	1	0	0	0	1			10.21	0	0	0	0	0	0
10.23	0	1	0	0	0	1			10.23	0	0	0	0	0	0
10.24	1	1	0	0	0	1			10.24	0	0	0	1	0	0
10.26	1	1	0	0	0	0			10.26	0	0	0	1	0	0
10.28	1	1	1	1	0	0			10.28	0	0	0	1	0	0
10.29	1	1	0	0	0	0			10.29	0	0	0	0	0	0
10.3	1	1	0	0	0	1			10.3	0	0	0	1	0	0
10.32	0	1	1	0	0	1			10.32	0	0	0	1	0	0
10.34	1	0	1	1	0	1			10.34	0	0	0	0	0	0
10.35	0	1	0	0	0	0			10.35	0	0	0	1	0	0
10.37	1	0	0	0	0	1			10.37	0	0	0	1	0	0
10.38	0	1	0	0	0	1			10.38	0	0	0	1	0	0
10.39	0	1	0	0	0	1			10.39	0	0	0	1	0	0
10.41	0	1	0	0	0	1			10.41	0	0	0	1	0	0
10.43	0	0	0	0	0	0			10.43	0	0	0	0	0	0
10.44	1	1	0	0	0	1			10.44	0	0	0	1	0	0
10.46	0	1	1	0	0	1			10.46	0	0	0	0	0	0
10.47	0	0	1	0	0	1			10.47	0	0	0	0	0	0
10.48	1	0	0	0	0	1			10.48	0	0	0	1	0	0
10.5	1	1	1	0	0	0			10.5	0	0	0	1	0	0
10.52	1	1	0	0	0	0			10.52	0	0	0	0	0	0
10.53	1	1	0	0	0	1			10.53	0	0	0	1	0	0
10.54	1	1	0	0	0	0			10.54	0	0	0	1	0	0
10.56	1	1	0	0	0	0			10.56	0	0	0	0	0	0
10.57	1	1	1	0	0	0			10.57	0	0	0	1	0	0
10.59	1	0	0	0	0	1			10.59	0	0	0	1	0	0
10.61	1	1	1	0	0	1			10.61	0	0	0	1	0	0
10.62	1	0	0	0	0	1			10.62	0	0	0	1	0	0
10.63	1	1	0	0	0	1			10.63	0	0	0	1	0	0
10.65	1	1	0	0	0	0			10.65	0	0	0	1	0	0
10.66	0	0	1	0	0	0			10.66	0	0	0	1	0	0
10.68	0	0	1	0	0	0			10.68	0	0	0	1	0	0
10.7	1	1	0	0	0	0			10.7	0	0	0	1	0	0
10.71	1	1	0	0	0	1			10.71	0	0	0	1	0	0
10.72	1	1	0	0	0	1			10.72	0	0	0	1	0	0
10.74	0	1	0	0	0	0			10.74	0	0	0	1	0	0
10.76	1	1	0	0	0	1			10.76	0	0	0	1	0	0
10.77	1	1	1	0	0	1			10.77	0	0	0	1	0	0
10.79	0	1	0	0	0	1			10.79	0	0	0	1	0	0
10.8	1	1	0	0	0	0			10.8	0	0	0	1	0	0
10.81	0	1	0	1	0	1			10.81	0	0	0	1	0	0
10.83	1	0	0	0	0	1			10.83	0	0	0	1	0	0
10.85	1	1	0	0	0	0			10.85	0	0	0	1	0	0
10.86	1	0	1	0	0	1			10.86	0	0	0	1	0	0
10.88	1	0	1	1	0	1			10.88	0	0	0	1	0	0
10.89	1	1	0	0	0	1			10.89	0	0	0	0	0	0
10.9	1	1	1	1	0	1			10.9	0	0	0	1	0	0
10.92	0	1	1	0	0	1			10.92	0	0	0	1	0	0
10.94	1	1	0	0	0	1			10.94	0	0	0	1	0	0
10.95	0	1	0	1	0	1			10.95	0	0	0	1	0	0
10.96	1	1	0	0	0	1			10.96	0	0	0	0	0	0
10.98	1	1	0	1	0	0			10.98	0	0	0	1	0	0
10.99	1	1	1	0	0	1			10.99	0	0	0	1	0	0
11.01	1	0	0	0	0	0			11.01	0	0	0	1	0	0
11.03	1	0	1	1	0	1			11.03	0	0	0	1	0	0
11.04	0	1	0	0	0	1			11.04	0	0	0	1	0	0
11.05	1	1	1	0	0	0			11.05	0	0	0	1	0	0
11.07	1	1	1	0	0	0			11.07	0	0	0	1	0	0
11.09	1	1	0	0	0	1			11.09	0	0	0	1	0	0
11.1	1	0	0	0	0	1			11.1	0	0	0	1	0	0
11.12	1	1	0	0	0	0			11.12	0	0	0	1	0	0
11.13	0	1	0	1	0	1			11.13	0	0	0	0	0	0
11.14	1	1	0	0	0	1			11.14	0	0	0	1	0	0
11.16	1	0	0	0	0	1			11.16	0	0	0	1	0	0
11.18	1	1	1	1	0	1			11.18	0	0	0	1	0	0
11.19	1	0	1	0	0	1			11.19	0	0	0	0	0	0
11.21	0	1	1	0	0	1			11.21	0	0	0	1	0	0
11.22	0	1	1	0	0	1			11.22	0	0	0	1	0	0
11.23	0	1	0	0	0	1			11.23	0	0	0	1	0	0
11.25	1	0	0	0	0	1			11.25	0	0	0	1	0	0
11.27	1	0	1	0	0	0			11.27	0	0	0	1	0	0
11.28	1	0	1	0	0	1			11.28	0	0	0	1	0	0
11.29	1	1	1	0	0	1			11.29	0	0	0	1	0	0
11.31	0	0	0	0	0	0			11.31	0	0	0	1	0	0
11.32	1	1	1	0	0	0			11.32	0	0	0	1	0	0
11.34	1	1	1	0	0	1			11.34	0	0	0	1	0	0
11.36	1	1	1	0	0	1			11.36	0	0	0	1	0	0
11.37	0	1	0	0	0	1			11.37	0	0	0	0	0	0
11.38	1	1	0	0	0	1			11.38	0	0	0	1	0	0
11.4	1	1	1	0	0	1			11.4	0	0	0	1	0	0
11.41	1	0	0	0	0	1			11.41	0	0	0	1	0	0
11.43	0	1	0	0	0	0			11.43	0	0	0	1	0	0
11.45	0	1	0	0	0	1			11.45	0	0	0	1	0	0
11.46	1	1	1	0	0	1			11.46	0	0	0	1	0	0
11.47	1	1	0	0	0	1			11.47	0	0	0	1	0	0
11.49	0	1	1	0	0	1			11.49	0	0	0	1	0	0
11.51	1	1	0	0	0	1			11.51	0	0	0	0	0	0
11.52	0	0	0	0	0	0			11.52	0	0	0	1	0	0
11.54	1	1	0	0	0	1			11.54	0	0	0	1	0	0
11.55	0	1	0	0	0	1			11.55	0	0	0	1	0	0
11.56	0	1	0	0	0	1			11.56	0	0	0	1	0	0
11.58	0	1	1	0	0	1			11.58	0	0	0	1	0	0
11.6	1	1	0	0	0	1			11.6	0	0	0	1	0	0
11.61	0	0	1	0	0	1			11.61	0	0	0	1	0	0
11.62	0	0	0	0	0	1			11.62	0	0	0	1	0	0
11.64	0	1	0	0	0	0			11.64	0	0	1	0	0	0
11.65	0	1	0	0	0	1			11.65	0	0	0	1	0	0
11.67	1	1	0	0	0	1			11.67	0	0	1	1	0	0
11.69	0	1	1	0	0	1			11.69	0	0	0	1	0	0
11.7	1	1	1	0	0	1			11.7	0	0	0	1	0	0
11.71	0	1	1	0	0	1			11.71	0	0	0	1	0	0
11.73	0	1	1	0	0	0			11.73	0	0	0	1	0	0
11.74	0	0	0	0	0	1			11.74	0	0	0	1	0	0
11.76	1	1	0	0	0	1			11.76	0	0	0	1	0	0
11.78	1	1	1	0	0	0			11.78	0	0	0	1	0	0
11.79	1	0	1	0	0	1			11.79	0	0	0	1	0	0
11.8	0	1	1	0	0	1			11.8	0	0	0	1	0	0
11.82	1	0	1	0	0	1			11.82	0	0	0	1	0	0
11.84	1	1	0	0	0	0			11.84	0	0	0	1	0	0
11.85	1	0	0	0	0	1			11.85	0	0	0	1	0	0
11.87	1	1	1	0	0	1			11.87	0	0	0	1	0	0
11.88	1	1	1	0	0	1			11.88	0	0	0	1	0	0
11.89	1	0	0	0	0	1			11.89	0	0	0	1	0	0
11.91	0	0	0	0	0	0			11.91	0	0	0	0	0	0
11.93	1	1	1	0	0	1			11.93	0	0	0	0	0	0
11.94	0	1	0	0	0	1			11.94	0	0	0	1	0	0
11.96	1	1	0	0	0	0			11.96	0	0	0	1	0	0
11.97	0	0	1	0	0	1			11.97	0	0	0	1	0	0
11.98	1	0	0	0	0	1			11.98	0	0	1	1	0	0
12	1	0	0	0	0	1			12	0	0	0	1	0	0
12.02	0	1	0	0	0	0			12.02	0	0	0	1	0	0
12.03	1	1	1	0	0	1			12.03	0	0	0	0	0	0
12.04	1	0	1	0	0	1			12.04	0	0	0	1	0	0
12.06	1	1	0	0	0	1			12.06	0	0	0	0	0	0
12.07	1	1	0	0	0	0			12.07	0	0	0	1	0	0
12.09	1	1	0	0	0	0			12.09	0	0	0	0	0	0
12.11	0	1	0	0	0	0			12.11	0	0	0	1	0	0
12.12	0	1	0	1	0	1			12.12	0	0	0	1	0	0
12.13	1	0	1	0	0	1			12.13	0	0	1	1	0	0
12.15	0	1	0	1	0	1			12.15	0	0	1	0	0	0
12.16	0	0	0	0	0	1			12.16	0	0	1	1	0	0
12.18	1	1	0	0	0	1			12.18	0	0	0	1	0	0
12.2	0	0	0	0	0	1			12.2	0	0	1	1	0	0
12.21	1	1	1	0	0	1			12.21	0	0	1	1	0	0
12.22	0	1	0	0	0	1			12.22	0	0	0	1	0	0
12.24	1	1	0	0	0	1			12.24	0	0	0	1	0	0
12.26	0	1	1	0	0	1			12.26	0	0	0	1	0	0
12.27	0	1	0	0	0	0			12.27	0	0	0	1	0	0
12.29	0	1	1	0	0	1			12.29	0	0	1	1	0	0
12.3	0	1	1	0	0	1			12.3	0	0	0	1	0	0
12.31	0	0	0	0	0	1			12.31	0	0	0	1	0	0
12.33	0	1	1	0	0	1			12.33	0	0	0	1	0	0
12.35	0	0	1	0	0	0			12.35	0	0	0	1	0	0
12.36	1	0	0	0	0	1			12.36	0	0	0	1	0	0
12.38	0	1	0	0	0	1			12.38	0	0	0	1	0	0
12.39	1	1	1	0	0	1			12.39	0	0	0	1	0	0
12.4	0	1	0	0	0	1			12.4	0	0	0	0	0	1
12.42	1	1	0	0	0	0			12.42	0	0	0	1	0	0
12.44	1	0	1	0	0	1			12.44	0	0	0	1	0	0
12.45	0	0	0	1	0	1			12.45	0	0	1	1	0	0
12.46	0	1	1	0	0	1			12.46	0	0	0	0	0	0
12.48	1	0	0	0	0	1			12.48	0	0	1	1	0	0
12.49	0	0	1	0	0	0			12.49	0	0	1	1	0	0
12.51	0	1	1	1	0	0			12.51	0	0	1	1	0	0
12.53	0	1	0	0	0	1			12.53	0	0	0	1	0	0
12.54	1	0	0	0	0	1			12.54	0	0	0	1	0	0
12.55	0	0	1	0	0	1			12.55	0	0	0	1	0	0
12.57	0	1	0	0	0	1			12.57	0	0	0	1	0	0
12.59	1	1	0	0	0	1			12.59	0	0	0	1	0	0
12.6	1	0	0	0	0	1			12.6	0	0	0	1	0	0
12.62	1	1	0	0	0	1			12.62	0	0	0	1	0	0
12.63	0	0	0	0	0	1			12.63	0	0	0	1	0	0
12.64	1	1	1	1	0	1			12.64	0	0	0	1	0	0
12.66	0	1	1	0	0	0			12.66	0	0	0	1	0	0
12.68	0	1	1	0	0	1			12.68	0	0	0	1	0	0
12.69	1	1	1	0	0	0			12.69	0	0	0	1	0	0
12.71	0	0	1	0	0	1			12.71	0	0	0	0	0	0
12.72	1	1	0	0	0	0			12.72	0	0	0	1	0	0
12.73	0	1	0	0	0	1			12.73	0	0	0	1	0	0
12.75	0	1	0	0	0	0			12.75	0	0	0	1	0	0
12.77	0	1	0	0	0	0			12.77	0	0	0	0	0	0
12.78	0	0	1	0	1	1			12.78	0	0	0	1	0	0
12.79	1	1	1	0	1	1			12.79	0	0	0	1	0	0
12.81	1	0	1	0	0	1			12.81	0	0	0	1	0	0
12.82	1	1	1	0	1	0			12.82	0	0	0	1	0	0
12.84	0	0	0	0	1	1			12.84	0	0	0	1	0	0
12.86	0	1	0	0	1	0			12.86	0	0	0	1	0	0
12.87	1	0	0	0	0	1			12.87	0	0	0	0	0	0
12.88	1	0	0	0	0	0			12.88	0	0	0	1	0	0
12.9	0	1	1	0	0	1			12.9	0	0	0	1	0	0
12.91	0	0	0	1	1	0			12.91	0	0	0	0	0	0
12.93	1	1	0	1	1	1			12.93	0	0	0	1	0	0
12.95	1	1	0	0	1	1			12.95	0	0	0	1	0	0
12.96	1	1	0	0	1	1			12.96	0	0	0	0	0	0
12.97	0	1	1	0	1	1			12.97	0	0	0	1	0	0
12.99	0	1	1	0	1	0			12.99	0	0	0	0	0	0
13.01	1	1	0	0	0	1			13.01	0	0	0	1	0	0
13.02	0	1	1	0	1	1			13.02	0	0	0	1	0	0
13.04	1	0	0	0	0	1			13.04	0	0	0	1	0	0
13.05	1	1	0	0	1	1			13.05	0	0	1	0	0	0
13.06	1	1	0	0	1	0			13.06	0	0	1	0	0	0
13.08	1	1	0	0	1	1			13.08	0	0	1	0	0	0
13.1	1	1	0	0	1	1			13.1	0	0	1	1	0	0
13.11	1	1	0	0	1	1			13.11	0	0	1	1	0	0
13.12	1	1	0	0	1	0			13.12	0	0	1	1	0	0
13.14	1	1	0	0	1	0			13.14	0	0	1	1	0	0
13.15	1	0	0	0	0	1			13.15	0	0	1	0	0	0
13.17	0	1	1	0	1	1			13.17	0	0	1	1	0	0
13.19	1	1	1	0	1	0			13.19	0	0	0	1	0	0
13.2	1	1	0	0	1	0			13.2	0	0	1	1	0	0
13.21	1	1	0	0	1	0			13.21	0	0	1	1	0	0
13.23	0	1	0	0	0	1			13.23	0	0	1	1	0	0
13.24	1	1	0	0	1	1			13.24	0	0	1	1	0	0
13.26	1	0	0	0	1	0			13.26	0	0	0	0	0	0
13.28	0	1	1	0	1	1			13.28	0	0	1	1	0	0
13.29	1	1	1	0	1	1			13.29	0	0	1	1	0	0
13.3	0	0	0	0	1	1			13.3	0	0	1	1	0	0
13.32	1	1	1	0	0	1			13.32	0	0	1	1	0	0
13.34	0	1	0	0	0	1			13.34	0	0	1	1	0	0
13.35	1	1	0	0	1	0			13.35	0	0	1	1	0	0
13.37	1	0	0	0	1	1			13.37	0	0	0	0	0	0
13.38	0	0	0	0	1	0			13.38	0	0	1	0	0	0
13.39	0	1	0	0	1	1			13.39	0	0	0	1	0	0
13.41	1	1	1	0	1	1			13.41	0	0	1	1	0	0
13.43	1	1	0	0	0	0			13.43	0	0	1	1	0	0
13.44	0	1	1	0	0	0			13.44	0	0	0	1	0	0
13.46	1	1	0	0	0	0			13.46	0	0	1	0	0	0
13.47	0	1	1	0	0	0			13.47	0	0	1	1	0	0
13.48	0	1	1	0	0	1			13.48	0	0	1	1	0	0
13.5	1	0	0	0	0	1			13.5	0	0	1	1	0	0
13.52	1	1	0	0	0	1			13.52	0	0	0	1	0	0
13.53	0	1	0	0	0	1			13.53	0	0	0	0	0	0
13.54	0	1	0	0	0	1			13.54	0	0	0	1	0	0
13.56	0	1	1	0	0	1			13.56	0	0	0	1	0	0
13.57	1	1	0	0	0	1			13.57	0	0	0	1	0	0
13.59	1	1	0	0	0	0			13.59	0	0	0	1	0	0
13.61	1	0	0	0	0	1			13.61	0	0	0	0	0	0
13.62	0	1	0	0	0	1			13.62	0	0	0	1	0	0
13.63	0	0	1	0	0	0			13.63	0	0	0	1	0	0
13.65	1	1	0	0	0	1			13.65	0	0	0	1	0	0
13.66	1	1	0	0	0	0			13.66	0	0	0	0	0	0
13.68	0	1	0	0	0	1			13.68	0	0	0	1	0	0
13.7	1	0	0	0	0	1			13.7	0	0	0	0	0	0
13.71	0	0	0	0	0	1			13.71	0	0	0	0	0	0
13.72	0	0	0	0	0	1			13.72	0	0	0	1	0	0
13.74	1	0	1	0	0	1			13.74	0	0	0	1	0	0
13.76	0	0	0	0	0	1			13.76	0	0	0	1	0	0
13.77	1	0	0	0	0	1			13.77	0	0	0	1	0	0
13.79	0	0	0	0	0	0			13.79	0	0	0	1	0	0
13.8	1	0	0	0	0	1			13.8	0	0	0	1	0	0
13.81	0	0	0	0	0	1			13.81	0	0	0	0	0	0
13.83	1	0	1	0	0	1			13.83	0	0	0	1	0	0
13.85	0	0	1	1	0	1			13.85	0	0	0	1	0	0
13.86	1	0	1	0	0	1			13.86	0	0	0	1	0	0
13.88	0	0	1	0	0	0			13.88	0	0	0	1	0	0
13.89	0	0	0	0	0	1			13.89	0	0	0	1	0	0
13.9	0	0	0	0	0	1			13.9	0	0	0	0	0	0
13.92	0	0	1	0	0	1			13.92	0	0	0	1	0	0
13.94	1	0	0	0	0	1			13.94	0	0	0	1	0	0
13.95	0	0	0	0	0	0			13.95	0	0	0	0	0	0
13.96	1	0	1	0	0	1			13.96	0	0	0	1	0	0
13.98	1	0	1	0	0	0			13.98	0	0	0	1	0	0
13.99	0	0	0	0	0	0			13.99	0	0	0	1	0	0
14.01	0	0	0	0	0	1			14.01	0	0	0	1	0	0
14.03	1	0	0	0	0	0			14.03	0	0	0	1	0	0
14.04	0	0	1	0	0	1			14.04	0	0	0	1	0	0
14.05	1	0	1	0	0	1			14.05	0	0	0	1	0	0
14.07	0	0	0	0	0	1			14.07	0	0	0	0	0	0
14.09	0	0	0	0	0	1			14.09	0	0	0	1	0	0
14.1	0	0	0	0	0	1			14.1	0	0	0	1	0	0
14.12	1	0	0	0	0	0			14.12	0	0	0	1	0	0
14.13	1	1	1	0	0	0			14.13	0	0	0	1	0	0
14.14	1	1	1	0	0	1			14.14	0	0	0	1	0	0
14.16	0	0	0	0	0	1			14.16	0	0	0	1	0	0
14.18	1	0	1	0	0	1			14.18	0	0	0	1	0	0
14.19	0	1	0	0	0	1			14.19	0	0	0	1	0	0
14.21	1	1	0	0	0	1			14.21	0	0	0	1	0	0
14.22	0	0	0	0	0	1			14.22	0	0	0	1	0	0
14.23	1	1	0	0	0	0			14.23	0	0	0	1	0	0
14.25	1	1	0	0	0	1			14.25	0	0	0	1	0	0
14.27	0	1	1	0	0	1			14.27	0	0	0	1	0	0
14.28	0	0	1	0	0	1			14.28	0	0	0	1	0	0
14.29	1	1	0	0	0	1			14.29	0	0	0	1	0	0
14.31	0	1	0	0	0	1			14.31	0	0	0	1	0	0
14.32	0	1	0	0	0	0			14.32	0	0	0	1	0	0
14.34	0	0	1	0	0	0			14.34	0	0	0	1	0	0
14.36	0	1	0	0	0	1			14.36	0	0	0	1	0	0
14.37	1	0	0	0	0	1			14.37	0	0	0	1	0	0
14.38	0	1	1	0	0	1			14.38	0	0	0	1	0	0
14.4	1	1	1	0	0	1			14.4	0	0	0	1	0	0
14.41	0	1	0	1	0	0			14.41	0	0	0	1	0	0
14.43	0	0	1	0	0	1			14.43	0	0	0	1	0	0
14.45	0	1	0	0	0	1			14.45	0	0	0	1	0	0
14.46	1	1	0	1	0	1			14.46	0	0	0	0	0	0
14.47	0	0	0	1	0	1			14.47	0	0	0	1	0	0
14.49	1	1	0	0	0	1			14.49	0	0	0	1	0	0
14.51	1	1	1	0	0	0			14.51	0	0	0	1	0	0
14.52	0	1	1	0	0	1			14.52	0	0	0	1	0	0
14.54	0	1	1	0	0	1			14.54	0	0	0	1	0	0
14.55	1	1	0	0	0	1			14.55	0	0	0	1	0	0
14.56	0	1	0	0	0	1			14.56	0	0	0	1	0	0
14.58	0	0	0	0	0	1			14.58	0	0	0	0	0	0
14.6	1	0	1	0	0	0			14.6	0	0	0	1	0	0
14.61	0	1	0	0	0	1			14.61	0	0	0	1	0	0
14.62	1	1	0	0	0	1			14.62	0	0	0	1	0	0
14.64	0	1	1	0	0	0			14.64	0	0	0	1	0	0
14.65	1	1	1	0	0	1			14.65	0	0	0	1	0	0
14.67	1	1	0	0	0	1			14.67	0	0	0	1	0	0
14.69	1	1	0	0	0	1			14.69	0	0	0	1	0	0
14.7	1	1	1	0	0	1			14.7	0	0	0	1	0	0
14.71	1	1	0	0	0	0			14.71	0	0	0	1	0	0
14.73	1	0	0	0	0	0			14.73	0	0	0	1	0	0
14.74	1	0	1	0	0	0			14.74	0	0	0	1	0	0
14.76	0	0	0	0	0	1			14.76	0	0	0	1	0	0
14.78	1	1	1	0	0	1			14.78	0	0	0	1	0	0
14.79	0	0	1	0	0	1			14.79	0	0	0	1	0	0
14.8	1	1	1	0	0	1			14.8	0	0	0	1	0	0
14.82	1	1	1	0	0	1			14.82	0	0	0	1	0	0
14.84	0	1	1	0	0	1			14.84	0	0	0	0	0	0
14.85	0	1	0	0	0	1			14.85	0	0	0	1	0	0
14.87	0	1	1	0	0	1			14.87	0	0	0	1	0	0
14.88	0	1	0	0	0	1			14.88	0	0	0	1	0	0
14.89	1	1	0	0	0	0			14.89	0	0	0	1	0	0
14.91	1	1	1	0	0	1			14.91	0	0	0	1	0	0
14.93	0	1	1	0	0	1			14.93	0	0	0	1	0	0
14.94	0	1	1	0	0	1			14.94	0	0	0	1	0	0
14.96	0	1	1	0	0	1			14.96	0	0	0	1	0	0
14.97	1	0	1	0	0	1			14.97	0	0	0	1	0	0
14.98	1	1	0	0	0	0			14.98	0	0	0	1	0	0
15	1	1	0	0	0	1			15	0	0	0	1	0	0
15.02	1	0	1	0	0	1			15.02	0	0	0	1	0	0
15.03	1	1	1	0	0	1			15.03	0	0	0	1	0	0
15.04	1	0	1	0	0	1			15.04	0	0	0	1	0	0
15.06	1	1	1	0	0	1			15.06	0	0	0	0	0	0
15.07	1	1	0	0	0	1			15.07	0	0	0	1	0	0
15.09	0	1	1	0	0	1			15.09	0	0	0	1	0	0
15.11	0	1	1	0	0	1			15.11	0	0	0	1	0	0
15.12	1	1	0	0	0	0			15.12	0	0	0	1	0	0
15.13	0	1	0	0	0	0			15.13	0	0	0	1	0	0
15.15	1	1	1	0	0	1			15.15	0	0	0	0	0	0
15.16	1	1	1	0	0	1			15.16	0	0	0	1	0	0
15.18	0	1	1	0	0	0			15.18	0	0	0	0	0	0
15.2	0	1	0	0	0	1			15.2	0	0	0	0	0	0
15.21	0	1	0	0	0	1			15.21	0	0	0	1	0	0
15.22	1	1	0	0	0	0			15.22	0	0	0	1	0	0
15.24	1	1	1	0	0	0			15.24	0	0	0	1	0	0
15.26	1	0	0	0	0	1			15.26	0	0	0	1	0	0
15.27	1	1	1	0	0	1			15.27	0	0	0	0	0	0
15.29	0	1	1	0	0	1			15.29	0	0	0	1	0	0
15.3	0	1	0	0	0	1			15.3	0	0	0	1	0	0
15.31	0	1	1	0	0	1			15.31	0	0	0	1	0	0
15.33	1	1	0	0	0	1			15.33	0	0	0	1	0	0
15.35	1	1	0	0	0	1			15.35	0	0	0	1	0	0
15.36	1	1	0	0	0	0			15.36	0	0	0	1	0	0
15.38	1	0	0	0	0	1			15.38	0	0	0	1	0	0
15.39	1	1	1	0	0	1			15.39	0	0	0	1	0	0
15.4	1	0	1	0	0	0			15.4	0	0	0	1	0	0
15.42	1	1	1	0	0	0			15.42	0	0	0	1	0	0
15.44	1	1	1	0	0	1			15.44	0	0	0	0	0	0
15.45	1	1	1	0	0	1			15.45	0	0	0	0	0	0
15.46	0	1	1	0	0	1			15.46	0	0	0	1	0	0
15.48	0	1	1	0	0	1			15.48	0	0	0	1	0	0
15.49	0	1	0	0	0	1			15.49	0	0	0	1	0	0
15.51	1	1	0	1	0	1			15.51	0	0	0	1	0	0
15.53	0	1	1	0	0	1			15.53	0	0	0	1	0	0
15.54	1	0	1	0	0	1			15.54	0	0	0	1	0	0
15.55	0	1	1	0	0	1			15.55	0	0	0	1	0	0
15.57	0	1	1	0	0	1			15.57	0	0	0	0	0	0
15.59	0	0	0	0	0	1			15.59	0	0	0	0	0	0
15.6	0	0	1	0	0	1			15.6	0	0	0	1	0	0
15.62	1	1	0	0	0	1			15.62	0	0	0	1	0	0
15.63	1	1	0	0	0	1			15.63	0	0	0	1	0	0
15.64	0	1	1	1	0	1			15.64	0	0	0	1	0	0
15.66	0	0	1	0	0	1			15.66	0	0	0	1	0	0
15.68	0	0	0	0	0	1			15.68	0	0	0	1	0	0
15.69	0	1	0	0	0	1			15.69	0	0	0	1	0	0
15.71	1	0	0	0	0	1			15.71	0	0	0	1	0	0
15.72	1	0	0	0	0	0			15.72	0	0	0	1	0	0
15.73	1	1	0	0	0	0			15.73	0	0	0	1	0	0
15.75	0	1	1	0	0	1			15.75	0	0	0	0	0	0
15.77	1	0	1	0	0	0			15.77	0	0	0	1	0	0
15.78	0	0	0	0	0	1			15.78	0	0	0	0	0	0
15.79	0	1	0	0	0	0			15.79	0	0	0	0	0	0
15.81	0	1	1	0	0	1			15.81	0	0	0	1	0	0
15.82	0	0	1	0	0	1			15.82	0	0	0	1	0	0
15.84	0	1	1	0	0	1			15.84	0	0	0	1	0	0
15.86	0	1	1	0	0	1			15.86	0	0	0	1	0	0
15.87	0	1	1	0	0	1			15.87	0	0	0	1	0	0
15.88	1	1	1	0	0	1			15.88	0	0	0	1	0	0
15.9	0	0	0	0	0	1			15.9	0	0	0	1	0	0
15.91	0	1	0	0	0	1			15.91	0	0	0	0	0	0
15.93	1	1	0	0	0	1			15.93	0	0	0	1	0	0
15.95	1	1	1	0	0	1			15.95	0	0	0	1	0	0
15.96	1	1	1	0	0	1			15.96	0	0	0	1	0	0
15.97	0	0	0	0	0	1			15.97	0	0	0	1	0	0
15.99	1	0	0	0	0	1			15.99	0	0	0	1	0	0
16	1	0	0	1	0	1			16	0	0	0	1	0	0
16.02	0	1	0	0	0	0			16.02	0	0	0	1	0	0
16.04	0	1	1	0	0	1			16.04	0	0	0	1	0	0
16.05	1	1	0	0	0	1			16.05	0	0	0	1	0	0
16.07	1	1	1	0	0	1			16.07	0	0	0	1	0	0
16.08	1	1	0	0	0	1			16.08	0	0	0	1	0	0
16.09	1	0	0	0	0	1			16.09	0	0	0	1	0	0
16.11	1	1	0	0	0	1			16.11	0	0	0	1	0	0
16.12	1	1	0	0	0	0			16.12	0	0	0	1	0	0
16.14	1	1	0	0	0	1			16.14	0	0	0	1	0	0
16.16	0	0	0	0	0	1			16.16	0	0	0	1	0	0
16.17	0	1	0	0	0	0			16.17	0	0	0	1	0	0
16.18	0	0	0	0	0	0			16.18	0	0	0	1	0	0
16.2	1	0	1	0	0	1			16.2	0	0	0	1	0	0
16.21	1	1	0	0	0	1			16.21	0	0	0	1	0	0
16.23	1	1	0	0	0	1			16.23	0	0	0	1	0	0
16.25	1	1	0	1	0	0			16.25	0	0	0	1	0	0
16.26	1	0	1	0	0	1			16.26	0	0	0	1	0	0
16.27	1	1	1	1	0	1			16.27	0	0	0	0	0	0
16.29	1	0	0	0	0	1			16.29	0	0	0	1	0	0
16.3	0	1	0	1	0	1			16.3	0	0	0	1	0	0
16.32	1	1	0	0	0	1			16.32	0	0	0	1	0	0
16.34	1	1	0	0	0	1			16.34	0	0	0	1	0	0
16.35	1	1	1	0	0	0			16.35	0	0	0	1	0	0
16.36	1	1	0	1	0	1			16.36	0	0	0	1	0	0
16.38	1	1	1	0	0	1			16.38	0	0	0	1	0	0
16.39	0	1	1	0	0	1			16.39	0	0	0	1	0	0
16.41	0	1	0	1	0	0			16.41	0	0	0	0	0	0
16.43	0	1	0	0	0	1			16.43	0	0	0	1	0	0
16.44	1	1	1	1	0	1			16.44	0	0	0	1	0	0
16.45	1	1	1	0	0	0			16.45	0	0	0	1	0	0
16.47	0	1	1	0	0	1			16.47	0	0	0	0	0	0
16.48	0	0	0	0	0	1			16.48	0	0	0	1	0	0
16.5	0	1	0	0	0	0			16.5	0	0	0	1	0	0
16.52	0	1	1	0	0	0			16.52	0	0	0	1	0	0
16.53	1	0	1	0	0	0			16.53	0	0	0	1	0	0
16.55	1	1	1	0	0	1			16.55	0	0	0	1	0	0
16.56	0	0	0	0	0	0			16.56	0	0	0	1	0	0
16.57	0	1	0	0	0	1			16.57	0	0	0	1	0	0
16.59	1	1	0	0	0	0			16.59	0	0	0	1	0	0
16.61	1	1	1	0	0	1			16.61	0	0	0	1	0	0
16.62	1	1	1	0	0	1			16.62	0	0	0	1	0	0
16.64	1	1	0	0	0	1			16.64	0	0	0	1	0	0
16.65	1	1	1	0	0	1			16.65	0	0	0	1	0	0
16.66	0	1	0	0	0	1			16.66	0	0	0	1	0	0
16.68	1	1	0	0	0	1			16.68	0	0	0	1	0	0
16.7	0	0	0	0	0	1			16.7	0	0	0	1	0	0
16.71	0	0	0	0	0	1			16.71	0	0	0	1	0	0
16.73	1	1	0	0	0	1			16.73	0	0	0	1	0	0
16.74	1	1	1	0	0	1			16.74	0	0	0	1	0	0
16.75	1	1	1	0	0	1			16.75	0	0	0	1	0	0
16.77	1	1	0	0	0	0			16.77	0	0	0	1	0	0
16.79	1	1	0	0	0	1			16.79	0	0	0	1	0	0
16.8	1	1	0	0	0	1			16.8	0	0	0	1	0	0
16.82	1	0	0	0	0	1			16.82	0	0	0	1	0	0
16.83	1	1	0	0	0	1			16.83	0	0	0	1	0	0
16.84	1	1	1	1	0	1			16.84	0	0	0	1	0	0
16.86	1	1	0	0	0	1			16.86	0	0	0	1	1	0
16.88	0	0	1	0	0	0			16.88	0	0	0	1	1	0
16.89	1	1	0	0	0	1			16.89	0	0	0	0	0	0
16.91	1	1	1	1	0	0			16.91	0	0	0	1	0	0
16.92	1	1	0	1	0	1			16.92	0	0	0	0	0	0
16.93	0	1	1	0	0	1			16.93	0	0	0	0	0	0
16.95	1	0	1	0	0	1			16.95	0	0	0	1	0	0
16.96	0	1	0	1	0	1			16.96	0	0	0	1	0	0
16.98	1	1	0	0	1	0			16.98	0	0	0	1	0	0
17	0	1	0	0	0	1			17	0	0	0	1	0	0
17.01	1	1	1	0	0	1			17.01	0	0	0	0	0	0
17.02	1	1	0	0	0	1			17.02	0	0	0	1	0	0
17.04	0	1	0	0	0	1			17.04	0	0	0	1	0	0
17.05	0	0	0	1	0	1			17.05	0	0	0	1	0	0
17.07	1	1	1	1	0	1			17.07	0	0	0	1	0	0
17.09	0	1	0	0	0	1			17.09	0	0	0	0	1	0
17.1	0	1	1	0	0	1			17.1	0	0	0	1	1	0
17.11	1	1	1	0	0	1			17.11	0	0	0	1	0	0
17.13	1	1	1	0	0	0			17.13	0	0	0	1	0	0
17.14	0	1	1	1	0	1			17.14	0	0	0	1	0	0
17.16	1	0	1	1	0	1			17.16	0	0	0	0	0	0
17.18	0	1	0	0	0	0			17.18	0	0	0	1	0	0
17.19	0	1	1	1	0	1			17.19	0	0	0	0	0	0
17.2	0	0	1	0	0	1			17.2	0	0	0	1	0	0
17.22	0	1	0	1	0	1			17.22	0	0	0	1	0	0
17.23	0	0	1	0	0	1			17.23	0	0	0	1	0	0
17.25	1	0	1	0	0	1			17.25	0	0	0	1	0	0
17.27	1	1	1	0	0	1			17.27	0	0	0	1	0	0
17.28	1	1	0	0	0	1			17.28	0	0	0	0	0	0
17.3	0	1	1	0	0	1			17.3	0	0	0	1	0	0
17.31	0	1	0	0	0	1			17.31	0	0	0	0	0	0
17.32	1	1	0	0	0	1			17.32	0	0	0	1	0	0
17.34	1	1	0	0	0	1			17.34	0	0	0	1	0	0
17.36	0	0	0	0	0	1			17.36	0	0	0	1	0	0
17.37	1	0	1	0	0	1			17.37	0	0	0	1	0	0
17.39	1	1	1	0	0	1			17.39	0	0	0	1	0	0
17.4	1	1	1	0	0	1			17.4	0	0	0	1	0	0
17.41	0	1	1	0	0	1			17.41	0	0	0	1	0	0
17.43	1	1	0	0	0	0			17.43	0	0	0	1	0	0
17.45	0	1	0	0	0	1			17.45	0	0	0	1	0	0
17.46	0	1	0	0	0	1			17.46	0	0	0	0	0	0
17.48	1	1	0	0	0	1			17.48	0	0	0	1	0	0
17.49	1	1	0	0	0	0			17.49	0	0	0	1	0	0
17.5	0	1	0	0	0	1			17.5	0	0	0	1	0	0
17.52	1	1	0	0	0	1			17.52	0	0	0	1	0	0
17.54	1	1	1	0	0	1			17.54	0	0	0	1	0	0
17.55	1	1	0	0	0	1			17.55	0	0	0	1	0	0
17.57	1	0	1	0	0	1			17.57	0	0	0	1	0	0
17.58	0	1	1	0	0	1			17.58	0	0	0	1	0	0
17.59	1	1	0	0	0	1			17.59	0	0	0	1	0	0
17.61	0	1	0	0	0	1			17.61	0	0	0	1	0	0
17.62	1	1	1	0	0	0			17.62	0	0	0	1	0	0
17.64	0	0	0	1	0	0			17.64	0	0	0	1	0	0
17.66	0	0	1	0	0	1			17.66	0	0	0	1	0	0
17.67	0	0	0	0	0	0			17.67	0	0	0	0	0	0
17.68	1	1	0	1	0	1			17.68	0	0	0	1	0	0
17.7	0	1	0	1	0	1			17.7	0	0	0	1	0	0
17.71	0	1	0	1	0	0			17.71	0	0	0	1	0	0
17.73	0	1	1	1	0	1			17.73	0	0	0	1	0	0
17.75	1	0	1	0	0	1			17.75	0	0	0	1	0	0
17.76	0	1	1	0	0	1			17.76	0	0	0	1	0	0
17.77	1	1	1	0	0	1			17.77	0	0	0	1	0	0
17.79	0	1	0	0	0	0			17.79	0	0	0	1	0	0
17.8	1	1	1	1	0	1			17.8	0	0	0	1	0	0
17.82	1	1	0	0	0	1			17.82	0	0	0	1	0	0
17.84	0	1	0	0	0	1			17.84	0	0	0	0	0	0
17.85	0	1	1	1	0	1			17.85	0	0	0	1	0	0
17.86	0	1	0	0	0	1			17.86	0	0	0	1	0	0
17.88	1	0	0	1	0	0			17.88	0	0	0	1	0	0
17.89	0	1	0	1	0	0			17.89	0	0	0	0	0	0
17.91	0	0	0	1	0	1			17.91	0	0	0	1	0	0
17.93	0	1	0	1	0	0			17.93	0	0	0	0	0	0
17.94	1	1	0	0	0	1			17.94	0	0	0	0	0	0
17.95	1	1	1	1	0	1			17.95	0	0	0	0	0	0
17.97	1	1	0	1	0	1			17.97	0	0	0	0	0	0
17.98	1	0	0	1	0	1			17.98	0	0	0	1	0	0
18	1	1	0	0	0	1			18	0	0	0	1	0	0
18.02	1	0	1	0	0	1			18.02	0	0	0	0	0	0
18.03	1	0	1	0	0	1			18.03	0	0	0	1	0	0
18.05	1	1	1	1	0	0			18.05	0	0	0	1	0	0
18.06	1	1	0	0	0	1			18.06	0	0	0	1	0	0
18.07	0	1	0	1	0	1			18.07	0	0	0	1	0	0
18.09	1	1	0	1	0	1			18.09	0	0	0	1	0	0
18.11	1	1	0	0	0	1			18.11	0	0	0	1	0	0
18.12	1	1	1	1	0	0			18.12	0	0	0	1	0	0
18.14	1	1	0	1	0	1			18.14	0	0	0	1	0	0
18.15	0	1	0	1	0	0			18.15	0	0	0	1	0	0
18.16	0	0	0	0	0	0			18.16	0	0	0	1	0	0
18.18	1	1	0	1	0	0			18.18	0	0	0	1	0	0
18.2	1	1	1	0	0	1			18.2	0	0	0	1	0	0
18.21	0	0	0	0	0	0			18.21	0	0	0	1	0	0
18.23	1	1	0	1	0	1			18.23	0	0	0	1	0	0
18.24	1	1	1	0	0	1			18.24	0	0	0	0	0	0
18.25	0	1	1	0	0	1			18.25	0	0	0	1	0	0
18.27	1	0	0	1	0	1			18.27	0	0	0	1	0	0
18.29	1	1	1	1	0	1			18.29	0	0	0	1	0	0
18.3	1	0	0	0	0	0			18.3	0	0	0	1	0	0
18.32	1	0	1	0	0	1			18.32	0	0	0	1	0	0
18.33	1	0	0	0	0	1			18.33	0	0	0	1	0	0
18.34	1	0	1	0	0	1			18.34	0	0	0	1	0	0
18.36	1	0	0	1	0	1			18.36	0	0	0	1	0	0
18.38	0	0	1	0	0	1			18.38	0	0	0	0	0	0
18.39	0	1	1	0	0	1			18.39	0	0	0	0	0	0
18.41	0	1	0	0	0	1			18.41	0	0	0	1	0	0
18.42	0	0	1	1	0	1			18.42	0	0	0	1	0	0
18.43	1	0	1	0	0	1			18.43	0	0	0	1	0	0
18.45	1	0	1	0	0	1			18.45	0	0	0	1	0	0
18.46	0	1	1	1	0	1			18.46	0	0	0	0	0	0
18.48	1	0	0	1	0	0			18.48	0	0	0	1	0	0
18.5	1	1	0	1	0	1			18.5	0	0	0	1	0	0
18.51	1	1	0	1	0	1			18.51	0	0	0	1	0	0
18.52	0	1	1	0	0	1			18.52	0	0	0	1	0	0
18.54	1	1	1	1	0	1			18.54	0	0	0	1	0	0
18.55	1	0	0	0	0	1			18.55	0	0	0	1	1	0
18.57	0	0	0	0	0	0			18.57	0	0	0	0	0	0
18.59	0	1	0	0	0	1			18.59	0	0	0	1	0	0
18.6	1	1	1	0	0	1			18.6	0	0	0	1	0	0
18.61	0	0	1	0	0	1			18.61	0	0	0	1	0	0
18.63	1	0	0	0	0	1			18.63	0	0	0	0	0	0
18.64	0	0	1	1	0	1			18.64	0	0	0	1	0	0
18.66	1	1	0	0	0	1			18.66	0	0	0	1	0	0
18.68	1	1	0	1	0	1			18.68	0	0	0	1	0	0
18.69	1	0	0	0	0	1			18.69	0	0	0	0	0	0
18.7	0	1	1	1	0	1			18.7	0	0	0	1	0	0
18.72	0	1	1	0	0	1			18.72	0	0	0	1	0	0
18.73	1	1	1	0	0	0			18.73	0	0	0	1	0	0
18.75	1	0	0	1	0	0			18.75	0	0	0	1	0	0
18.77	1	1	0	0	0	0			18.77	0	0	0	1	0	0
18.78	1	1	1	0	0	1			18.78	0	0	0	1	0	0
18.8	0	0	1	0	0	0			18.8	0	0	0	1	0	0
18.81	1	0	0	0	0	1			18.81	0	0	0	1	0	0
18.82	1	1	0	0	0	1			18.82	0	0	0	1	0	0
18.84	1	0	1	1	0	1			18.84	0	0	0	1	0	0
18.86	1	0	0	0	0	1			18.86	0	0	0	1	0	0
18.87	1	1	1	0	0	1			18.87	0	0	0	1	0	0
18.89	1	1	1	1	0	0			18.89	0	0	0	1	0	0
18.9	1	0	1	1	0	1			18.9	0	0	0	1	0	0
18.91	1	0	0	0	0	1			18.91	0	0	0	1	0	0
18.93	1	1	1	0	0	1			18.93	0	0	0	1	0	0
18.95	1	1	0	1	0	1			18.95	0	0	0	1	0	0
18.96	1	0	1	1	0	1			18.96	0	0	0	1	1	0
18.98	1	0	1	0	0	1			18.98	0	0	0	1	0	0
18.99	0	1	1	1	0	1			18.99	0	0	0	1	0	0
19	1	0	0	0	1	0			19	0	0	0	1	0	0
19.02	0	1	0	0	1	1			19.02	0	0	0	1	0	0
19.04	0	0	0	0	0	1			19.04	0	0	0	1	0	0
19.05	0	1	0	0	0	1			19.05	0	0	0	0	0	0
19.07	0	1	0	1	0	1			19.07	0	0	0	1	1	0
19.08	1	1	1	0	0	1			19.08	0	0	0	1	0	0
19.09	0	0	1	1	0	1			19.09	0	0	0	1	0	0
19.11	0	1	1	0	0	1			19.11	0	0	0	1	0	0
19.12	1	0	1	0	0	1			19.12	0	0	0	1	1	0
19.14	1	1	0	0	0	1			19.14	0	0	0	1	0	0
19.16	0	0	1	1	0	1			19.16	0	0	0	1	0	0
19.17	0	0	0	0	0	1			19.17	0	0	0	1	0	0
19.18	1	0	1	0	0	0			19.18	0	0	0	0	0	0
19.2	1	0	0	0	0	1			19.2	0	0	0	1	0	0
19.21	1	1	1	0	0	1			19.21	0	0	0	1	0	0
19.23	1	0	1	0	0	0			19.23	0	0	0	1	0	0
19.25	0	1	0	0	0	1			19.25	0	0	0	1	0	0
19.26	0	1	1	0	0	0			19.26	0	0	0	1	0	0
19.27	0	0	1	0	0	1			19.27	0	0	0	1	0	0
19.29	1	1	1	0	0	0			19.29	0	0	0	1	0	0
19.3	1	1	1	0	0	1			19.3	0	0	0	1	0	0
19.32	1	0	0	0	0	1			19.32	0	0	0	1	0	0
19.34	1	0	1	0	0	1			19.34	0	0	0	1	0	0
19.35	1	1	0	0	0	1			19.35	0	0	0	1	0	0
19.36	0	1	1	0	0	0			19.36	0	0	0	1	0	0
19.38	1	0	0	0	0	1			19.38	0	0	0	1	0	0
19.39	1	0	1	0	0	1			19.39	0	0	0	1	0	0
19.41	1	1	1	1	0	0			19.41	0	0	0	0	0	0
19.43	0	0	1	0	0	1			19.43	0	0	0	1	0	0
19.44	1	1	0	0	0	1			19.44	0	0	0	0	0	0
19.45	0	1	0	0	0	0			19.45	0	0	0	1	0	0
19.47	1	0	1	1	0	1			19.47	0	0	0	0	0	0
19.48	1	1	0	1	0	1			19.48	0	0	0	1	0	0
19.5	1	0	0	0	0	0			19.5	0	0	0	1	0	0
19.52	0	0	1	0	0	1			19.52	0	0	0	1	0	0
19.53	1	0	0	1	0	1			19.53	0	0	0	0	0	0
19.55	1	1	1	0	0	1			19.55	0	0	0	1	0	0
19.56	1	1	0	0	0	1			19.56	0	0	0	1	0	0
19.57	1	1	0	0	0	1			19.57	0	0	0	1	0	0
19.59	1	1	0	0	0	1			19.59	0	0	0	1	0	0
19.61	1	1	1	0	0	0			19.61	0	0	0	1	0	0
19.62	1	1	0	0	0	1			19.62	0	0	0	1	0	0
19.64	1	0	1	0	0	0			19.64	0	0	0	1	0	0
19.65	0	1	0	0	0	1			19.65	0	0	0	1	0	0
19.66	1	1	0	0	0	1			19.66	0	0	0	1	0	0
19.68	0	1	1	0	0	1			19.68	0	0	0	0	0	0
19.7	1	1	0	0	0	1			19.7	0	0	0	0	0	0
19.71	1	0	0	0	0	1			19.71	0	0	0	1	0	0
19.73	1	0	0	0	0	1			19.73	0	0	0	1	0	0
19.74	0	0	1	0	0	1			19.74	0	0	0	1	0	0
19.75	1	1	1	1	0	0			19.75	0	0	0	1	0	0
19.77	0	1	0	0	0	0			19.77	0	0	0	1	0	0
19.79	0	1	0	0	0	1			19.79	0	0	0	1	0	0
19.8	1	0	0	1	0	1			19.8	0	0	0	1	1	0
19.82	0	0	1	1	0	1			19.82	0	0	0	1	1	0
19.83	1	1	0	0	0	0			19.83	0	0	0	1	0	0
19.84	0	1	0	0	0	1			19.84	0	0	0	1	0	0
19.86	1	1	0	0	0	1			19.86	0	0	0	1	0	0
19.88	0	0	0	0	0	1			19.88	0	0	0	1	0	0
19.89	1	1	0	0	0	1			19.89	0	0	0	1	0	0
19.91	1	1	0	0	0	1			19.91	0	0	0	1	0	0
19.92	1	1	0	0	0	1			19.92	0	0	0	1	0	0
19.93	1	1	0	1	0	0			19.93	0	0	0	1	0	0
19.95	1	1	0	0	0	1			19.95	0	0	0	1	0	0
19.96	0	1	0	0	0	1			19.96	0	0	0	1	0	0
19.98	1	0	0	0	0	1			19.98	0	0	0	1	1	0
20	0	1	1	0	0	1			20	0	0	0	1	0	0
20.01	1	1	0	0	0	1			20.01	0	0	0	1	0	0
20.02	1	0	1	0	0	0			20.02	0	0	0	1	0	0
20.04	1	1	1	0	0	1			20.04	0	0	0	0	0	0
20.05	1	1	0	1	0	1			20.05	0	0	0	1	0	0
20.07	0	0	1	0	0	1			20.07	0	0	0	1	0	0
20.09	0	0	0	0	0	1			20.09	0	0	0	0	0	0
20.1	1	0	1	0	0	1			20.1	0	0	0	1	0	0
20.11	0	1	0	0	0	1			20.11	0	0	1	0	0	0
20.13	1	0	0	0	0	1			20.13	0	0	0	1	0	0
20.14	0	1	1	0	0	0			20.14	0	0	0	1	0	0
20.16	0	1	0	0	0	0			20.16	0	0	0	0	0	0
20.18	1	0	0	1	0	0			20.18	0	0	0	1	0	0
20.19	1	1	1	0	0	1			20.19	0	0	0	0	0	0
20.2	1	1	0	1	0	0			20.2	0	0	0	1	0	0
20.22	0	1	0	0	0	1			20.22	0	0	0	1	0	0
20.23	1	1	1	0	0	1			20.23	0	0	0	1	0	0
20.25	1	1	1	0	0	1			20.25	0	0	0	1	0	0
20.27	1	1	1	0	0	1			20.27	0	0	0	1	0	0
20.28	1	0	0	0	0	1			20.28	0	0	0	1	0	0
20.3	1	1	0	0	0	1			20.3	0	0	0	1	0	0
20.31	1	1	1	0	0	0			20.31	0	0	0	1	0	0
20.32	1	1	0	0	0	1			20.32	0	0	0	1	0	0
20.34	0	1	0	0	0	1			20.34	0	0	0	1	0	0
20.36	0	1	1	0	0	1			20.36	0	0	0	1	0	0
20.37	1	0	0	0	0	0			20.37	0	0	0	1	0	0
20.39	0	0	1	0	0	0			20.39	0	0	0	1	0	0
20.4	1	1	1	0	0	1			20.4	0	0	0	1	1	0
20.41	0	0	1	0	0	1			20.41	0	0	0	1	1	0
20.43	1	1	0	0	0	0			20.43	0	0	0	1	1	0
20.45	0	1	0	0	0	0			20.45	0	0	0	0	1	0
20.46	1	0	0	1	0	1			20.46	0	0	0	1	0	0
20.48	1	1	0	0	0	1			20.48	0	0	0	0	1	0
20.49	1	1	0	0	0	1			20.49	0	0	0	1	1	0
20.5	1	1	0	0	0	0			20.5	0	0	0	1	1	0
20.52	0	0	1	0	0	0			20.52	0	0	0	0	1	0
20.54	0	0	1	0	0	0			20.54	0	0	0	1	1	0
20.55	1	0	0	1	0	1			20.55	0	0	0	1	1	0
20.57	1	0	0	0	0	0			20.57	0	0	0	1	0	0
20.58	1	0	0	0	0	1			20.58	0	0	0	0	0	0
20.59	0	0	0	0	0	1			20.59	0	0	0	1	1	0
20.61	1	0	1	0	0	1			20.61	0	0	0	1	0	0
20.62	1	1	0	1	0	1			20.62	0	0	0	1	1	0
20.64	1	0	0	1	0	1			20.64	0	0	0	1	1	0
20.66	1	1	0	0	0	1			20.66	0	0	0	0	1	0
20.67	0	0	1	0	0	1			20.67	0	0	0	1	1	0
20.68	0	0	0	0	0	1			20.68	0	0	0	0	0	0
20.7	0	0	0	0	0	1			20.7	0	0	0	0	0	0
20.71	0	1	0	1	0	1			20.71	0	0	0	1	0	0
20.73	1	0	1	0	0	1			20.73	0	0	0	1	1	0
20.75	0	1	1	1	0	0			20.75	0	0	0	1	1	0
20.76	0	1	1	1	0	1			20.76	0	0	0	1	1	0
20.77	1	1	0	0	0	1			20.77	0	0	0	1	1	0
20.79	0	1	0	1	0	1			20.79	0	0	0	0	1	0
20.8	1	1	0	0	0	1			20.8	0	0	0	0	0	0
20.82	1	1	0	0	0	0			20.82	0	0	0	1	1	0
20.84	0	1	1	0	0	1			20.84	0	0	0	1	1	0
20.85	0	0	1	0	0	1			20.85	0	0	0	0	1	0
20.86	1	1	1	1	0	1			20.86	0	0	0	1	1	0
20.88	1	1	0	0	0	1			20.88	0	0	0	1	0	0
20.89	1	1	0	0	0	1			20.89	0	0	0	1	0	0
20.91	0	0	1	0	0	0			20.91	0	0	0	0	0	0
20.93	0	1	0	0	0	1			20.93	0	0	0	1	1	0
20.94	0	1	1	0	0	1			20.94	0	0	0	1	1	0
20.95	1	0	0	0	0	1			20.95	0	0	0	1	1	0
20.97	0	1	1	0	0	0			20.97	0	0	0	1	0	0
20.98	1	0	1	0	0	1			20.98	0	0	0	1	1	0
21	1	1	0	1	0	1			21	0	0	0	1	0	0
21.02	1	1	0	0	0	1			21.02	0	0	0	1	0	0
21.03	1	1	0	0	0	0			21.03	0	0	0	0	1	0
21.05	1	0	0	0	0	0			21.05	0	0	0	1	1	0
21.06	1	1	0	0	0	1			21.06	0	0	0	1	1	0
21.07	0	0	1	0	0	1			21.07	0	0	0	0	1	0
21.09	0	1	0	0	0	1			21.09	0	0	0	1	0	0
21.11	1	1	0	0	0	1			21.11	0	0	0	1	0	0
21.12	0	0	0	0	0	1			21.12	0	0	0	1	0	0
21.14	0	1	0	0	0	1			21.14	0	0	0	1	1	0
21.15	0	1	1	1	0	0			21.15	0	0	0	1	1	0
21.16	1	1	1	0	0	1			21.16	0	0	0	1	1	0
21.18	1	0	1	0	0	0			21.18	0	0	0	1	0	0
21.2	1	0	1	0	0	0			21.2	0	0	0	1	0	0
21.21	0	1	1	0	0	0			21.21	0	0	0	1	0	0
21.23	1	1	0	1	0	1			21.23	0	0	0	1	1	0
21.24	0	0	1	0	0	1			21.24	0	0	0	1	1	0
21.25	0	1	1	0	0	0			21.25	0	0	0	1	0	0
21.27	0	1	1	1	0	1			21.27	0	0	0	1	0	0
21.29	0	0	0	1	0	0			21.29	0	0	0	1	0	0
21.3	1	1	0	0	0	1			21.3	0	0	0	1	0	0
21.32	1	1	0	1	0	1			21.32	0	0	0	1	1	0
21.33	0	1	1	0	0	1			21.33	0	0	0	1	1	0
21.34	0	0	0	0	0	1			21.34	0	0	0	1	0	0
21.36	0	1	0	0	0	1			21.36	0	0	0	1	0	0
21.38	1	1	0	1	0	1			21.38	0	0	0	1	0	0
21.39	1	1	1	0	0	1			21.39	0	0	0	1	0	0
21.41	0	1	0	0	0	1			21.41	0	0	0	1	0	0
21.42	0	0	0	0	1	0			21.42	0	0	0	0	0	0
21.43	1	0	1	1	1	1			21.43	0	0	0	0	0	0
21.45	1	1	1	0	0	1			21.45	0	0	0	1	0	0
21.46	0	1	0	0	0	1			21.46	0	0	0	1	0	0
21.48	1	1	1	0	0	1			21.48	0	0	0	1	0	0
21.5	0	1	0	1	1	1			21.5	0	0	0	0	0	0
21.51	0	1	1	0	1	1			21.51	0	0	0	1	1	0
21.52	0	1	1	0	1	1			21.52	0	0	0	1	0	0
21.54	1	1	1	0	1	1			21.54	0	0	0	0	1	0
21.55	0	0	1	1	1	0			21.55	0	0	0	1	1	0
21.57	1	1	0	1	1	0			21.57	0	0	0	1	0	0
21.59	0	0	0	0	1	1			21.59	0	0	0	1	1	0
21.6	0	1	0	0	1	1			21.6	0	0	0	1	0	0
21.61	0	1	1	0	1	1			21.61	0	0	0	1	0	0
21.63	0	0	0	0	1	1			21.63	0	0	0	1	1	0
21.64	0	1	0	0	1	1			21.64	0	0	0	1	1	0
21.66	0	1	1	0	0	1			21.66	0	0	0	1	1	0
21.68	1	1	1	0	1	1			21.68	0	0	0	0	1	0
21.69	1	0	0	0	1	1			21.69	0	0	0	1	1	0
21.7	1	0	0	0	1	0			21.7	0	0	0	1	1	0
21.72	1	1	0	0	1	1			21.72	0	0	0	1	0	0
21.73	1	1	0	0	1	1			21.73	0	0	0	1	0	0
21.75	0	1	1	0	1	0			21.75	0	0	0	1	1	0
21.77	1	1	1	0	0	1			21.77	0	0	0	1	0	0
21.78	1	1	1	1	0	1			21.78	0	0	0	1	1	0
21.8	0	0	1	0	0	1			21.8	0	0	0	1	1	0
21.81	0	1	0	1	1	1			21.81	0	0	0	1	0	0
21.82	0	1	1	1	1	1			21.82	0	0	0	1	1	0
21.84	0	1	1	1	1	1			21.84	0	0	0	1	1	0
21.86	0	1	0	1	1	1			21.86	0	0	0	1	1	0
21.87	1	1	1	1	1	1			21.87	0	0	0	1	1	0
21.89	0	1	1	0	1	1			21.89	0	0	0	1	1	0
21.9	0	1	0	1	1	1			21.9	0	0	0	1	0	0
21.91	0	0	1	1	1	0			21.91	0	0	0	1	1	0
21.93	1	1	1	0	1	1			21.93	0	0	0	1	1	0
21.95	0	1	0	0	0	0			21.95	0	0	0	1	0	0
21.96	0	1	1	0	0	1			21.96	0	0	0	1	1	0
21.98	0	1	0	0	0	1			21.98	0	0	0	1	1	0
21.99	1	0	1	1	0	1			21.99	0	0	0	1	0	0
22	0	0	0	0	0	1			22	0	0	0	1	1	0
22.02	0	1	1	0	0	0			22.02	0	0	0	0	1	0
22.04	1	1	1	0	0	1			22.04	0	0	0	0	1	0
22.05	0	0	0	1	0	0			22.05	0	0	0	1	0	0
22.07	0	1	1	0	0	1			22.07	0	0	0	1	1	0
22.08	0	1	1	0	0	1			22.08	0	0	0	1	1	0
22.09	0	0	1	1	0	0			22.09	0	0	0	1	0	0
22.11	1	0	0	0	0	1			22.11	0	0	0	1	1	0
22.12	0	0	1	1	0	0			22.12	0	0	0	1	0	0
22.14	0	1	0	0	0	0			22.14	0	0	0	1	0	0
22.16	1	1	0	0	0	0			22.16	0	0	0	1	0	0
22.17	1	0	1	0	0	1			22.17	0	0	0	1	0	0
22.18	1	0	0	0	0	1			22.18	0	0	0	1	0	0
22.2	1	1	0	0	0	1			22.2	0	0	0	1	0	0
22.21	1	1	1	0	0	1			22.21	0	0	0	1	0	0
22.23	0	0	0	0	0	1			22.23	0	0	0	1	0	0
22.25	1	1	0	1	0	1			22.25	0	0	0	1	0	0
22.26	1	0	1	1	0	1			22.26	0	0	0	1	0	0
22.27	1	0	0	1	0	1			22.27	0	0	0	1	0	0
22.29	1	1	1	0	0	0			22.29	0	0	0	1	1	0
22.3	0	0	1	1	0	0			22.3	0	0	0	1	1	0
22.32	0	1	0	0	0	1			22.32	0	0	0	1	0	0
22.34	0	1	1	1	0	1			22.34	0	0	0	1	0	0
22.35	0	1	1	1	0	0			22.35	0	0	0	1	0	0
22.36	1	0	1	1	0	1			22.36	0	0	0	1	0	0
22.38	1	1	1	0	0	1			22.38	0	0	0	1	0	0
22.39	0	1	1	1	0	1			22.39	0	0	0	0	0	0
22.41	0	1	0	0	0	0			22.41	0	0	0	1	0	0
22.43	1	1	0	1	0	1			22.43	0	0	0	1	0	0
22.44	1	1	0	1	0	1			22.44	0	0	0	1	0	0
22.45	1	1	0	0	0	1			22.45	0	0	0	1	0	0
22.47	0	1	0	0	0	1			22.47	0	0	0	1	0	0
22.48	0	1	1	0	0	1			22.48	0	0	0	1	0	0
22.5	0	0	0	0	0	1			22.5	0	0	0	1	0	0
22.52	0	1	1	1	0	1			22.52	0	0	0	1	0	0
22.53	1	0	0	1	0	1			22.53	0	0	0	1	0	0
22.55	0	1	0	1	0	1			22.55	0	0	0	1	0	0
22.56	1	0	0	0	0	1			22.56	0	0	0	1	0	0
22.57	1	1	1	0	0	1			22.57	0	0	0	1	0	0
22.59	1	0	1	1	0	0			22.59	0	0	0	0	0	0
22.61	0	1	1	0	0	1			22.61	0	0	0	1	0	0
22.62	0	1	1	0	0	1			22.62	0	0	0	1	0	0
22.64	1	0	0	1	0	1			22.64	0	0	0	1	0	0
22.65	1	1	1	0	0	1			22.65	0	0	0	1	0	0
22.66	1	0	0	0	0	1			22.66	0	0	0	1	0	0
22.68	0	1	0	1	0	1			22.68	0	0	0	1	0	0
22.7	0	0	1	1	0	1			22.7	0	0	0	1	0	0
22.71	1	0	1	0	0	1			22.71	0	0	0	0	0	0
22.73	0	1	1	0	0	1			22.73	0	0	0	0	0	0
22.74	1	1	0	1	0	0			22.74	0	0	0	1	0	0
22.75	0	1	1	1	0	0			22.75	0	0	0	1	0	0
22.77	0	1	1	1	0	0			22.77	0	0	0	1	0	0
22.79	0	1	0	1	0	1			22.79	0	0	0	0	0	0
22.8	0	0	0	1	0	1			22.8	0	0	0	1	0	0
22.82	1	1	0	1	0	0			22.82	0	0	0	1	0	0
22.83	1	1	1	1	0	1			22.83	0	0	0	1	0	0
22.84	0	1	1	1	0	1			22.84	0	0	0	1	0	0
22.86	0	1	1	1	0	1			22.86	0	0	0	1	0	0
22.88	0	1	1	0	0	0			22.88	0	0	0	0	0	0
22.89	1	1	0	0	0	1			22.89	0	0	0	1	0	0
22.91	0	0	0	0	0	1			22.91	0	0	0	1	0	0
22.92	0	0	0	0	0	1			22.92	0	0	0	1	0	0
22.93	0	1	1	1	0	1			22.93	0	0	0	1	0	0
22.95	0	1	0	0	0	0			22.95	0	0	0	1	0	0
22.96	0	0	1	0	0	0			22.96	0	0	0	1	0	0
22.98	0	0	0	0	0	0			22.98	0	0	0	1	0	0
23	0	1	0	1	0	1			23	0	0	0	0	0	0
23.01	0	1	1	1	0	1			23.01	0	0	0	1	0	0
23.02	1	0	1	1	0	0			23.02	0	0	0	1	0	0
23.04	1	1	1	0	0	0			23.04	0	0	0	1	0	0
23.05	1	1	1	0	0	1			23.05	0	0	0	1	0	0
23.07	1	0	1	0	0	1			23.07	0	0	0	1	0	0
23.09	0	1	1	0	0	0			23.09	0	0	0	1	0	0
23.1	0	1	0	1	0	1			23.1	0	0	0	0	0	0
23.11	0	0	0	0	0	1			23.11	0	0	0	1	0	0
23.13	0	1	1	0	0	0			23.13	0	0	0	1	0	0
23.14	0	0	1	0	0	0			23.14	0	0	0	1	0	0
23.16	0	0	1	0	0	1			23.16	0	0	0	1	0	0
23.18	0	0	1	1	0	0			23.18	0	0	0	1	0	0
23.19	0	0	1	0	0	1			23.19	0	0	0	0	0	0
23.2	0	0	1	0	0	1			23.2	0	0	0	1	0	0
23.22	0	0	0	0	0	0			23.22	0	0	0	1	0	0
23.23	0	0	1	0	0	1			23.23	0	0	0	1	0	0
23.25	0	0	0	0	0	1			23.25	0	0	0	1	0	0
23.27	0	0	0	0	0	1			23.27	0	0	0	0	0	0
23.28	1	0	1	0	0	1			23.28	0	0	0	0	0	0
23.3	0	0	0	1	0	1			23.3	0	0	0	0	0	0
23.31	1	0	0	1	0	1			23.31	0	0	0	1	0	0
23.32	0	1	0	1	0	0			23.32	0	0	0	1	0	0
23.34	0	0	0	1	0	1			23.34	0	0	0	1	0	0
23.36	1	1	1	0	0	1			23.36	0	0	0	1	0	0
23.37	0	1	0	0	0	1			23.37	0	0	0	0	0	0
23.39	0	0	1	0	0	1			23.39	0	0	0	1	0	0
23.4	1	0	1	1	0	1			23.4	0	0	0	1	0	0
23.41	0	1	1	0	0	1			23.41	0	0	0	1	0	0
23.43	0	1	1	0	0	0			23.43	0	0	0	1	0	0
23.45	1	0	0	0	0	1			23.45	0	0	0	1	0	0
23.46	1	1	0	0	0	0			23.46	0	0	0	1	0	0
23.48	0	1	1	0	0	1			23.48	0	0	0	1	0	0
23.49	0	1	1	0	0	1			23.49	0	0	0	1	0	0
23.5	1	1	1	1	0	1			23.5	0	0	0	1	0	0
23.52	0	0	1	1	0	0			23.52	0	0	0	1	0	0
23.54	1	1	1	1	0	1			23.54	0	0	0	1	0	0
23.55	0	1	0	0	0	1			23.55	0	0	0	1	0	0
23.57	0	1	1	0	0	0			23.57	0	0	0	0	0	0
23.58	1	0	1	0	0	1			23.58	0	0	0	1	0	0
23.59	1	1	0	0	0	1			23.59	0	0	0	1	0	0
23.61	1	0	1	1	0	1			23.61	0	0	0	1	0	0
23.62	0	1	0	0	0	1			23.62	0	0	0	1	0	0
23.64	0	1	1	0	0	0			23.64	0	0	0	1	0	0
23.66	1	0	0	0	0	0			23.66	0	0	0	1	0	0
23.67	0	1	1	0	0	0			23.67	0	0	0	0	0	0
23.68	1	1	1	0	0	1			23.68	0	0	0	1	0	0
23.7	0	1	0	0	0	1			23.7	0	0	0	1	0	0
23.71	1	0	0	0	0	1			23.71	0	0	0	0	0	0
23.73	0	0	0	0	0	1			23.73	0	0	0	1	0	0
23.75	1	1	0	0	0	0			23.75	0	0	0	1	0	0
23.76	1	1	1	1	0	1			23.76	0	0	0	1	0	0
23.77	0	0	0	1	0	1			23.77	0	0	0	1	0	0
23.79	1	0	0	0	0	1			23.79	0	0	0	0	0	0
23.8	0	1	1	1	0	1			23.8	0	0	0	1	0	0
23.82	0	0	0	1	0	1			23.82	0	0	0	1	0	0
23.84	0	1	1	1	0	1			23.84	0	0	0	0	0	0
23.85	0	0	0	0	0	1			23.85	0	0	0	0	0	0
23.86	1	0	0	1	0	1			23.86	0	0	0	1	0	0
23.88	0	0	1	0	0	1			23.88	0	0	0	1	0	0
23.89	0	0	1	1	0	1			23.89	0	0	0	1	0	0
23.91	0	1	0	1	0	1			23.91	0	0	0	1	0	0
23.93	0	1	1	0	0	1			23.93	0	0	0	1	0	0
23.94	0	0	0	0	0	1			23.94	0	0	0	1	0	0
23.95	0	0	1	0	0	0			23.95	0	0	0	1	0	0
23.97	1	1	1	0	0	0			23.97	0	0	0	1	0	0
23.98	0	1	1	0	0	1			23.98	0	0	0	1	0	0
24	0	1	1	1	0	1			24	0	0	0	1	0	0
24.02	1	1	1	0	0	1			24.02	0	0	0	1	0	0
24.03	0	0	0	1	0	0			24.03	0	0	0	1	0	0
24.05	1	1	1	0	0	0			24.05	0	0	0	1	0	0
24.06	1	0	0	1	0	0			24.06	0	0	0	1	0	0
24.07	1	0	1	0	0	1			24.07	0	0	0	1	0	0
24.09	1	1	0	1	0	0			24.09	0	0	0	1	0	0
24.11	0	0	0	0	0	0			24.11	0	0	0	0	0	0
24.12	1	1	0	1	0	1			24.12	0	0	0	1	0	0
24.14	0	1	0	1	0	0			24.14	0	0	0	1	0	0
24.15	0	1	0	0	0	1			24.15	0	0	0	1	0	0
24.16	0	0	0	1	0	1			24.16	0	0	0	1	0	0
24.18	0	1	0	0	0	1			24.18	0	0	0	1	0	0
24.2	1	1	0	1	0	1			24.2	0	0	0	1	0	0
24.21	0	0	0	0	0	1			24.21	0	0	0	1	0	0
24.23	0	0	1	0	0	1			24.23	0	0	0	0	0	0
24.24	0	0	1	0	0	1			24.24	0	0	0	1	0	0
24.25	0	1	1	0	0	1			24.25	0	0	0	1	0	0
24.27	0	1	1	0	0	0			24.27	0	0	1	1	0	0
24.29	0	0	1	0	0	1			24.29	0	0	1	1	0	0
24.3	0	0	0	0	0	1			24.3	0	0	1	1	0	0
24.32	0	1	1	1	0	1			24.32	0	0	1	0	0	0
24.33	0	1	1	1	0	1			24.33	0	0	0	1	0	0
24.34	1	1	0	0	0	1			24.34	0	0	0	0	0	0
24.36	0	1	1	0	0	1			24.36	0	0	1	1	0	0
24.38	1	0	0	0	0	1			24.38	0	0	0	0	0	0
24.39	0	0	1	0	0	1			24.39	0	0	0	1	0	0
24.41	0	0	1	0	0	1			24.41	0	0	0	1	0	0
24.42	0	1	1	1	0	1			24.42	0	0	0	1	0	0
24.43	0	1	1	1	0	1			24.43	0	0	0	1	0	0
24.45	0	1	0	0	0	0			24.45	0	0	0	1	0	0
24.46	0	0	1	0	0	1			24.46	0	0	0	1	0	0
24.48	0	1	1	0	0	1			24.48	0	0	0	0	0	0
24.5	0	1	0	1	0	1			24.5	0	0	0	0	0	0
24.51	0	1	1	1	0	1			24.51	0	0	0	0	0	0
24.52	1	0	1	0	0	1			24.52	0	0	0	1	0	0
24.54	0	1	1	1	0	1			24.54	0	0	0	1	0	0
24.55	0	1	1	1	0	1			24.55	0	0	0	1	0	0
24.57	0	1	0	0	0	1			24.57	0	0	0	0	0	0
24.59	0	1	0	1	0	1			24.59	0	0	0	1	0	0
24.6	0	1	0	1	0	1			24.6	0	0	0	1	0	0
24.61	0	0	1	0	0	1			24.61	0	0	0	1	0	0
24.63	1	1	1	1	0	1			24.63	0	0	0	1	0	0
24.64	0	0	1	0	0	0			24.64	0	0	0	1	0	0
24.66	0	1	1	1	0	1			24.66	0	0	0	1	0	0
24.68	0	1	1	1	0	1			24.68	0	0	0	0	0	0
24.69	0	0	0	1	0	1			24.69	0	0	0	1	0	0
24.7	0	1	0	1	0	1			24.7	0	0	0	1	0	0
24.72	0	0	1	1	0	1			24.72	0	0	0	1	0	0
24.73	0	0	1	0	0	1			24.73	0	0	0	1	0	0
24.75	1	1	0	0	0	1			24.75	0	0	0	1	0	0
24.77	0	0	0	0	0	1			24.77	0	0	0	1	0	0
24.78	0	0	1	0	0	1			24.78	0	0	0	1	0	0
24.8	0	0	0	1	0	1			24.8	0	0	0	1	0	0
24.81	0	1	0	1	0	1			24.81	0	0	0	1	0	0
24.82	1	1	0	1	1	1			24.82	0	0	0	1	0	0
24.84	0	1	1	0	1	1			24.84	0	0	0	0	0	0
24.86	0	1	0	0	0	1			24.86	0	0	0	0	0	0
24.87	1	1	1	1	0	0			24.87	0	0	0	1	0	0
24.89	0	1	0	0	1	0			24.89	0	0	0	0	0	0
24.9	0	0	0	0	0	1			24.9	0	0	0	0	0	0
24.91	0	1	0	0	1	0			24.91	0	0	0	1	0	0
24.93	1	1	0	0	0	0			24.93	0	0	0	0	0	0
24.95	0	1	1	1	0	1			24.95	0	0	0	1	0	0
24.96	1	1	1	0	0	1			24.96	0	0	0	1	0	0
24.98	1	1	0	0	0	1			24.98	0	0	0	0	0	0
24.99	1	1	1	0	0	0			24.99	0	0	0	1	0	0
25	0	1	0	1	0	1			25	0	0	0	0	0	0
25.02	1	1	1	0	0	1			25.02	0	0	0	1	0	0
25.04	0	1	1	1	0	1			25.04	0	0	0	0	0	0
25.05	1	1	0	1	0	1			25.05	0	0	0	1	0	0
25.07	0	0	0	0	0	1			25.07	0	0	0	1	0	0
25.08	1	1	1	0	0	1			25.08	0	0	0	1	0	0
25.09	1	1	0	1	0	0			25.09	0	0	0	0	0	0
25.11	0	1	1	0	0	1			25.11	0	0	0	1	0	0
25.12	0	1	0	1	1	0			25.12	0	0	0	1	0	0
25.14	0	1	1	0	1	1			25.14	0	0	0	1	0	0
25.16	0	0	0	0	1	0			25.16	0	0	0	1	0	0
25.17	0	1	0	0	1	1			25.17	0	0	0	1	0	0
25.18	1	1	0	0	1	1			25.18	0	0	0	1	0	0
25.2	1	0	0	0	0	1			25.2	0	0	0	0	0	0
25.21	0	1	0	1	1	1			25.21	0	0	0	1	0	0
25.23	0	1	0	0	0	1			25.23	0	0	0	1	0	0
25.25	0	0	1	1	0	1			25.25	0	0	0	1	0	0
25.26	0	0	1	1	1	1			25.26	0	0	0	1	0	0
25.27	0	0	0	0	0	1			25.27	0	0	0	1	0	0
25.29	1	0	0	1	0	1			25.29	0	0	0	1	0	0
25.3	1	1	0	0	1	1			25.3	0	0	0	1	0	0
25.32	0	0	0	0	0	0			25.32	0	0	0	1	0	0
25.34	0	0	1	1	0	1			25.34	0	0	0	0	0	0
25.35	0	1	1	1	0	0			25.35	0	0	0	0	0	0
25.36	0	1	0	0	0	0			25.36	0	0	0	1	0	0
25.38	1	1	0	1	0	1			25.38	0	0	0	1	0	0
25.39	0	0	1	0	0	1			25.39	0	0	0	1	0	0
25.41	0	0	0	1	0	0			25.41	0	0	0	1	0	0
25.43	0	1	1	0	0	1			25.43	0	0	0	1	0	0
25.44	0	1	0	1	0	1			25.44	0	0	0	0	0	0
25.45	1	1	0	1	0	1			25.45	0	0	0	1	0	0
25.47	0	1	0	0	0	1			25.47	0	0	0	1	0	0
25.48	0	0	1	1	0	0			25.48	0	0	0	1	0	0
25.5	0	1	0	1	0	1			25.5	0	0	0	1	0	0
25.52	0	0	1	0	0	1			25.52	0	0	0	0	0	0
25.53	0	0	0	1	0	1			25.53	0	0	0	1	0	0
25.55	0	0	1	0	0	1			25.55	0	0	0	1	0	0
25.56	0	0	0	0	0	1			25.56	0	0	0	1	0	0
25.57	0	0	0	1	0	1			25.57	0	0	0	1	0	0
25.59	0	0	0	0	0	1			25.59	0	0	0	1	0	0
25.61	0	1	1	1	0	1			25.61	0	0	0	1	0	0
25.62	1	1	0	0	0	1			25.62	0	0	0	1	0	0
25.64	0	1	1	0	0	0			25.64	0	0	0	1	0	0
25.65	0	1	0	0	0	1			25.65	0	0	0	1	0	0
25.66	1	1	1	0	0	0			25.66	0	0	0	1	0	0
25.68	0	1	0	1	0	1			25.68	0	0	0	1	0	0
25.7	0	1	0	1	0	1			25.7	0	0	0	1	0	0
25.71	0	1	0	0	0	1			25.71	0	0	0	0	0	0
25.73	0	1	0	1	0	1			25.73	0	0	0	1	0	0
25.74	1	0	1	0	0	1			25.74	0	0	0	1	0	0
25.75	0	1	0	0	0	1			25.75	0	0	0	1	0	0
25.77	0	0	1	0	0	0			25.77	0	0	0	1	0	0
25.79	0	0	1	1	0	0			25.79	0	0	0	1	0	0
25.8	0	0	1	0	0	1			25.8	0	0	0	1	0	0
25.82	1	0	1	0	0	1			25.82	0	0	0	1	0	0
25.83	1	0	0	0	0	1			25.83	0	0	0	1	0	0
25.84	0	0	0	0	0	1			25.84	0	0	0	1	0	0
25.86	0	0	1	0	0	1			25.86	0	0	0	0	0	0
25.88	1	0	0	0	0	1			25.88	0	0	0	1	0	0
25.89	1	0	0	0	0	0			25.89	0	0	0	1	0	0
25.91	0	0	0	1	0	0			25.91	0	0	0	1	0	0
25.92	1	0	0	0	0	1			25.92	0	0	0	1	0	0
25.93	1	1	0	0	0	1			25.93	0	0	0	1	0	0
25.95	1	0	0	1	0	0			25.95	0	0	0	1	0	0
25.96	1	1	0	0	0	0			25.96	0	0	0	1	0	0
25.98	1	0	0	0	0	1			25.98	0	0	0	1	0	0
26	1	0	0	0	0	1			26	0	0	0	1	0	0
26.01	0	0	1	1	0	0			26.01	0	0	0	1	0	0
26.02	0	0	0	0	0	0			26.02	0	0	0	1	0	0
26.04	0	0	0	0	0	1			26.04	0	0	0	1	0	0
26.05	0	0	1	1	0	1			26.05	0	0	0	1	0	0
26.07	1	0	0	0	0	0			26.07	0	0	0	1	0	0
26.09	1	0	1	0	0	1			26.09	0	0	0	1	0	0
26.1	0	1	1	0	0	1			26.1	0	0	0	1	0	0
26.11	0	1	0	0	0	1			26.11	0	0	0	1	0	0
26.13	0	1	0	1	0	1			26.13	0	0	1	1	0	0
26.14	1	1	1	1	0	1			26.14	0	0	0	1	0	0
26.16	0	0	0	0	0	1			26.16	0	0	0	1	0	0
26.18	1	0	1	0	0	0			26.18	0	0	0	1	0	0
26.19	0	1	0	0	0	1			26.19	0	0	0	1	0	0
26.2	0	1	0	0	0	1			26.2	0	0	1	1	0	0
26.22	0	1	0	1	0	1			26.22	0	0	1	1	0	0
26.23	0	0	0	0	0	1			26.23	0	0	0	1	0	0
26.25	0	1	0	1	0	1			26.25	0	0	0	0	0	0
26.27	0	0	0	1	0	1			26.27	0	0	1	1	0	0
26.28	0	0	0	1	0	1			26.28	0	0	0	1	0	0
26.3	1	0	0	0	0	0			26.3	0	0	0	1	0	0
26.31	0	1	0	1	0	1			26.31	0	0	0	1	0	0
26.32	0	1	0	1	0	0			26.32	0	0	1	1	0	0
26.34	1	0	0	1	0	1			26.34	0	0	0	1	0	0
26.36	0	0	0	0	0	0			26.36	0	0	0	1	0	0
26.37	0	1	0	0	0	1			26.37	0	0	1	1	0	1
26.39	0	1	1	0	0	1			26.39	0	0	0	1	0	0
26.4	0	1	0	0	0	1			26.4	0	0	0	1	0	1
26.41	0	0	0	1	0	1			26.41	0	0	1	0	0	0
26.43	1	1	0	0	0	1			26.43	0	0	1	1	0	0
26.45	1	1	0	1	0	1			26.45	0	0	0	1	0	0
26.46	0	0	0	1	0	1			26.46	0	0	1	1	0	1
26.48	1	1	0	1	0	0			26.48	0	0	1	1	0	0
26.49	0	1	0	0	0	1			26.49	0	0	1	1	0	1
26.5	0	1	0	1	0	0			26.5	0	0	1	1	0	0
26.52	1	0	0	0	0	0			26.52	0	0	1	1	0	0
26.54	0	0	0	0	0	0			26.54	0	0	1	1	0	1
26.55	0	1	0	1	0	1			26.55	0	0	0	1	0	0
26.57	0	1	0	0	0	1			26.57	0	0	0	1	0	0
26.58	0	1	1	1	0	0			26.58	0	0	0	1	0	0
26.59	0	1	0	0	0	0			26.59	0	0	1	0	0	0
26.61	1	1	0	0	0	1			26.61	0	0	1	1	0	0
26.62	1	0	1	0	0	1			26.62	0	0	0	1	0	0
26.64	0	1	0	0	0	1			26.64	0	0	0	1	0	0
26.66	0	1	1	0	0	1			26.66	0	0	1	1	0	0
26.67	1	0	1	0	0	1			26.67	0	0	1	1	0	0
26.68	1	1	1	0	0	0			26.68	0	0	1	1	0	0
26.7	1	1	1	0	0	0			26.7	0	0	1	0	0	0
26.71	0	0	0	0	0	0			26.71	0	0	1	1	0	0
26.73	0	1	1	0	0	1			26.73	0	0	1	0	0	0
26.75	1	0	0	1	0	1			26.75	0	0	1	1	0	0
26.76	0	0	0	1	0	0			26.76	0	0	1	0	0	0
26.77	0	0	0	0	0	1			26.77	0	0	1	1	0	0
26.79	1	1	0	0	0	1			26.79	0	0	1	1	0	0
26.8	1	1	0	0	0	1			26.8	0	0	0	1	0	0
26.82	1	0	1	0	0	0			26.82	0	0	1	1	0	0
26.84	1	0	0	1	0	1			26.84	0	0	0	1	0	0
26.85	1	0	1	0	0	1			26.85	0	0	1	1	0	0
26.86	0	1	0	1	0	1			26.86	0	0	1	1	0	0
26.88	0	1	0	1	0	1			26.88	0	0	0	0	0	0
26.89	0	0	0	1	0	1			26.89	0	0	0	1	0	0
26.91	0	1	1	0	0	1			26.91	0	0	0	1	0	0
26.93	0	1	1	1	0	1			26.93	0	0	1	1	0	0
26.94	0	1	0	1	0	0			26.94	0	0	1	1	0	0
26.95	1	0	1	0	0	1			26.95	0	0	1	1	0	0
26.97	0	0	0	1	0	0			26.97	0	0	0	0	0	0
26.98	1	1	0	0	0	1			26.98	0	0	1	1	0	0
27	1	0	0	0	0	1			27	0	0	0	1	0	0
27.02	0	0	0	1	0	1			27.02	0	0	0	1	0	0
27.03	1	1	0	0	0	1			27.03	0	0	1	1	0	0
27.05	0	0	0	1	0	1			27.05	0	0	1	1	0	0
27.06	0	0	0	1	0	1			27.06	0	0	1	1	0	0
27.07	0	0	0	0	0	1			27.07	0	0	1	1	0	0
27.09	0	0	0	0	0	0			27.09	0	0	0	1	0	0
27.11	1	0	0	0	0	1			27.11	0	0	1	1	0	0
27.12	1	1	1	1	0	1			27.12	0	0	1	1	0	0
27.14	1	0	0	1	0	1			27.14	0	0	0	1	0	0
27.15	0	1	1	0	0	1			27.15	0	0	0	1	0	0
27.16	1	1	1	0	0	0			27.16	0	0	1	1	0	0
27.18	0	0	0	0	0	1			27.18	0	0	1	0	0	0
27.2	0	1	0	0	0	1			27.2	0	0	1	1	0	0
27.21	0	0	0	1	0	1			27.21	0	0	1	1	0	0
27.23	1	1	0	1	0	1			27.23	0	0	1	1	0	0
27.24	1	1	0	0	0	0			27.24	0	0	0	1	0	0
27.25	1	0	0	1	0	1			27.25	0	0	0	1	0	0
27.27	0	1	0	0	0	1			27.27	0	0	1	1	0	0
27.29	1	1	1	1	0	1			27.29	0	0	1	1	0	0
27.3	1	1	1	0	0	1			27.3	0	0	1	1	0	0
27.32	0	1	0	1	0	0			27.32	0	0	1	1	0	0
27.33	1	0	0	0	0	1			27.33	0	0	1	1	0	0
27.34	0	1	1	0	0	0			27.34	0	0	1	0	0	0
27.36	1	1	0	1	0	1			27.36	0	0	1	1	0	0
27.38	0	1	1	0	0	0			27.38	0	0	0	1	0	0
27.39	1	0	0	1	0	1			27.39	0	0	0	0	0	0
27.41	0	1	1	0	0	1			27.41	0	0	0	1	0	0
27.42	1	0	1	0	0	1			27.42	0	0	0	0	0	0
27.43	0	1	1	0	0	1			27.43	0	0	0	1	0	0
27.45	0	0	1	0	0	1			27.45	0	0	1	1	0	0
27.46	1	1	0	1	0	1			27.46	0	0	0	1	0	0
27.48	1	1	0	0	0	1			27.48	0	0	1	1	0	0
27.5	1	0	0	1	0	1			27.5	0	0	0	1	0	0
27.51	1	1	0	0	0	0			27.51	0	0	0	0	0	0
27.52	0	1	0	0	0	1			27.52	0	0	1	1	0	0
27.54	0	1	1	0	0	1			27.54	0	0	1	1	0	0
27.55	1	0	1	1	0	1			27.55	0	0	1	1	0	0
27.57	1	1	0	0	0	1			27.57	0	0	1	1	0	0
27.59	0	1	0	1	0	1			27.59	0	0	1	1	0	0
27.6	0	0	0	0	0	1			27.6	0	0	1	0	0	0
27.61	1	1	0	0	0	0			27.61	0	0	1	0	0	0
27.63	0	0	0	1	0	1			27.63	0	0	0	1	0	0
27.64	0	1	1	0	0	1			27.64	0	0	0	1	0	0
27.66	1	1	1	0	0	0			27.66	0	0	1	1	0	0
27.68	1	0	1	0	0	0			27.68	0	0	0	1	0	0
27.69	0	0	1	1	0	1			27.69	0	0	0	1	0	0
27.7	0	0	0	1	0	1			27.7	0	0	1	1	0	0
27.72	1	0	1	1	0	1			27.72	0	0	1	1	0	0
27.73	1	0	0	0	0	1			27.73	0	0	1	1	0	0
27.75	1	1	1	0	0	0			27.75	0	0	1	1	0	0
27.77	0	0	1	1	0	1			27.77	0	0	0	1	0	0
27.78	0	0	0	0	0	1			27.78	0	0	1	1	0	0
27.8	1	0	1	1	0	0			27.8	0	0	0	1	0	0
27.81	0	1	0	0	0	0			27.81	0	0	0	1	0	0
27.82	1	0	1	1	0	0			27.82	0	0	1	1	0	0
27.84	1	1	0	1	0	1			27.84	0	0	1	1	0	0
27.86	0	1	1	0	0	1			27.86	0	0	0	1	0	0
27.87	1	0	1	0	0	0			27.87	0	0	1	0	0	0
27.89	0	0	0	0	0	0			27.89	0	0	1	1	0	0
27.9	1	1	1	1	0	1			27.9	0	0	1	1	0	0
27.91	1	0	0	0	0	1			27.91	0	0	1	1	0	0
27.93	0	1	0	0	0	0			27.93	0	0	1	1	0	0
27.95	1	0	1	0	0	0			27.95	0	0	0	1	0	0
27.96	0	1	1	0	0	1			27.96	0	0	1	1	0	0
27.98	0	0	0	0	0	1			27.98	0	0	0	0	0	0
27.99	0	1	0	1	0	1			27.99	0	0	0	1	0	0
28	1	0	1	0	0	1			28	0	0	0	1	0	0
28.02	1	0	1	0	0	0			28.02	0	0	0	1	0	0
28.04	1	1	0	0	0	1			28.04	0	0	0	1	0	0
28.05	1	0	1	0	0	1			28.05	0	0	1	0	0	0
28.07	0	0	1	0	0	1			28.07	0	0	0	1	0	0
28.08	0	1	0	0	0	1			28.08	0	0	1	1	0	0
28.09	1	1	0	0	0	1			28.09	0	0	1	1	0	0
28.11	0	0	0	1	0	1			28.11	0	0	1	1	0	0
28.12	1	0	0	0	0	1			28.12	0	0	1	1	0	0
28.14	0	0	0	1	0	0			28.14	0	0	1	1	0	0
28.16	1	0	0	0	0	1			28.16	0	0	1	1	0	0
28.17	0	1	1	0	0	1			28.17	0	0	0	0	0	0
28.18	0	0	1	0	0	1			28.18	0	0	1	1	0	0
28.2	1	0	0	1	0	1			28.2	0	0	0	1	0	0
28.21	0	1	0	0	0	1			28.21	0	0	0	1	0	0
28.23	0	1	1	1	0	1			28.23	0	0	1	1	0	0
28.25	0	1	0	1	0	1			28.25	0	0	1	0	0	0
28.26	0	0	0	1	0	1			28.26	0	0	1	1	0	0
28.27	0	1	0	0	0	1			28.27	0	0	0	1	0	0
28.29	1	1	0	1	0	1			28.29	0	0	0	1	0	0
28.3	0	1	1	0	0	1			28.3	0	0	0	1	0	0
28.32	0	0	1	0	0	0			28.32	0	0	1	1	0	0
28.34	1	0	0	0	0	1			28.34	0	0	1	0	0	0
28.35	1	0	1	1	0	0			28.35	0	0	1	1	0	0
28.36	0	1	0	1	0	0			28.36	0	0	1	1	0	0
28.38	1	1	0	0	0	0			28.38	0	0	1	1	0	0
28.39	0	1	0	0	0	1			28.39	0	0	0	1	0	0
28.41	0	0	0	0	0	1			28.41	0	0	1	1	0	0
28.43	1	1	1	0	0	0			28.43	0	0	0	1	0	0
28.44	1	1	1	1	0	1			28.44	0	0	1	1	0	0
28.45	0	1	1	1	0	1			28.45	0	0	0	1	0	0
28.47	0	1	0	0	0	1			28.47	0	0	1	1	0	0
28.48	0	0	1	1	0	1			28.48	0	0	1	1	0	0
28.5	0	1	0	1	0	1			28.5	0	0	1	1	0	0
28.52	0	1	0	0	0	1			28.52	0	0	0	0	0	0
28.53	0	0	0	1	0	1			28.53	0	0	1	1	0	0
28.55	0	0	0	0	0	1			28.55	0	0	0	1	0	0
28.56	1	0	0	0	0	1			28.56	0	0	0	1	0	0
28.57	1	1	1	1	0	0			28.57	0	0	0	1	0	0
28.59	1	1	0	1	0	0			28.59	0	0	0	1	0	0
28.61	0	1	1	0	0	0			28.61	0	0	0	1	0	0
28.62	1	1	1	1	0	0			28.62	0	0	0	1	0	0
28.64	1	1	1	1	0	1			28.64	0	0	0	1	0	0
28.65	1	0	0	1	0	1			28.65	0	0	0	1	0	0
28.66	0	1	1	1	0	1			28.66	0	0	0	1	0	0
28.68	0	0	1	0	0	1			28.68	0	0	0	1	0	0
28.7	0	0	0	1	0	1			28.7	0	0	0	1	0	0
28.71	1	1	0	1	0	1			28.71	0	0	1	1	0	0
28.73	1	1	0	1	0	1			28.73	0	0	0	0	0	0
28.74	0	0	0	0	0	1			28.74	0	0	0	1	0	0
28.75	0	0	0	1	0	1			28.75	0	0	0	1	0	0
28.77	0	1	1	0	0	0			28.77	0	0	1	1	0	0
28.79	0	1	1	0	0	0			28.79	0	0	0	1	0	0
28.8	0	1	1	1	0	0			28.8	0	0	0	1	0	0
28.82	0	1	1	1	0	1			28.82	0	0	1	1	0	0
28.83	1	1	1	1	0	1			28.83	0	0	1	1	0	0
28.84	0	1	1	1	0	1			28.84	0	0	0	1	0	0
28.86	1	1	0	1	0	1			28.86	0	0	0	1	0	0
28.88	1	0	0	0	0	1			28.88	0	0	0	1	0	0
28.89	1	1	0	0	0	1			28.89	0	0	0	1	0	0
28.91	1	1	1	1	0	1			28.91	0	0	0	1	0	0
28.92	0	1	1	1	0	1			28.92	0	0	0	1	0	0
28.93	0	1	1	0	0	1			28.93	0	0	1	1	0	0
28.95	0	0	0	1	0	0			28.95	0	0	1	1	0	0
28.96	1	1	0	1	0	1			28.96	0	0	1	1	0	0
28.98	0	0	0	1	0	0			28.98	0	0	0	1	0	0
29	1	1	0	1	0	1			29	0	0	1	1	0	0
29.01	1	1	1	0	0	1			29.01	0	0	1	0	0	0
29.02	1	0	1	1	0	1			29.02	0	0	1	0	0	0
29.04	0	1	0	0	0	1			29.04	0	0	0	0	0	0
29.05	0	1	0	0	0	1			29.05	0	0	1	0	0	0
29.07	0	1	1	0	0	0			29.07	0	0	1	1	0	0
29.09	0	1	1	0	0	1			29.09	0	0	0	1	0	0
29.1	0	0	0	0	0	1			29.1	0	0	0	1	0	0
29.11	0	1	0	1	0	1			29.11	0	0	1	1	0	0
29.13	0	0	0	0	0	1			29.13	0	0	0	0	0	0
29.14	0	0	0	0	0	0			29.14	0	0	0	1	0	0
29.16	1	1	0	1	0	1			29.16	0	0	1	1	0	0
29.18	1	1	0	0	0	0			29.18	0	0	1	1	0	0
29.19	1	1	0	0	0	1			29.19	0	0	0	0	0	0
29.2	0	1	0	0	0	1			29.2	0	0	0	1	0	0
29.22	0	0	0	0	0	0			29.22	0	0	1	0	0	0
29.23	0	0	0	0	0	1			29.23	0	0	0	1	0	0
29.25	0	0	0	0	0	1			29.25	0	0	0	0	0	0
29.27	0	0	0	1	0	1			29.27	0	0	0	1	0	0
29.28	1	0	0	0	0	1			29.28	0	0	0	1	0	0
29.3	1	0	0	0	0	1			29.3	0	0	1	1	0	0
29.31	0	0	0	0	0	1			29.31	0	0	0	1	0	0
29.32	0	0	0	1	0	0			29.32	0	0	0	1	0	0
29.34	1	0	1	1	0	0			29.34	0	0	0	1	0	0
29.36	0	0	1	0	0	1			29.36	0	0	0	1	0	0
29.37	1	0	0	1	0	1			29.37	0	0	0	1	0	0
29.39	0	0	1	1	0	1			29.39	0	0	0	1	0	0
29.4	0	0	0	1	0	1			29.4	0	0	1	0	0	0
29.41	0	0	0	1	0	1			29.41	0	0	0	1	0	0
29.43	1	1	0	1	0	0			29.43	0	0	0	1	0	0
29.45	1	0	0	1	0	1			29.45	0	0	0	1	0	0
29.46	0	0	0	0	0	0			29.46	0	0	0	0	0	0
29.48	1	0	0	1	0	1			29.48	0	0	0	1	0	0
29.49	0	0	0	1	0	1			29.49	0	0	0	1	0	0
29.5	0	0	0	0	0	1			29.5	0	0	0	0	0	0
29.52	0	1	0	0	0	0			29.52	0	0	0	1	0	0
29.54	1	0	0	1	0	1			29.54	0	0	0	1	0	0
29.55	1	1	0	1	0	0			29.55	0	0	0	1	0	0
29.57	1	0	0	1	0	1			29.57	0	0	0	1	0	0
29.58	0	0	0	0	0	1			29.58	0	0	0	0	0	0
29.59	1	0	0	0	0	1			29.59	0	0	0	1	0	0
29.61	1	0	0	0	0	0			29.61	0	0	0	1	0	0
29.62	0	0	0	1	0	0			29.62	0	0	0	1	0	0
29.64	1	0	0	1	0	0			29.64	0	0	0	1	0	0
29.66	0	1	0	1	0	1			29.66	0	0	0	1	0	0
29.67	1	0	0	0	0	1			29.67	0	0	0	1	0	0
29.68	1	1	1	0	0	1			29.68	0	0	0	0	0	0
29.7	1	0	0	1	0	1			29.7	0	0	0	1	0	0
29.71	1	0	0	0	0	0			29.71	0	0	0	1	0	0
29.73	0	0	0	0	0	1			29.73	0	0	0	1	0	0
29.75	1	0	1	0	0	0			29.75	0	0	0	1	0	0
29.76	1	1	0	0	0	0			29.76	0	0	0	1	0	0
29.77	0	0	0	1	0	1			29.77	0	0	0	1	0	0
29.79	0	0	0	1	0	1			29.79	0	0	1	1	0	0
29.8	0	1	1	1	0	1			29.8	0	0	0	1	0	0
29.82	0	0	0	0	0	1			29.82	0	0	1	1	0	0
29.84	1	0	1	1	0	1			29.84	0	0	0	1	0	0
29.85	1	0	1	0	0	1			29.85	0	0	0	1	0	0
29.86	0	0	0	0	0	1			29.86	0	0	0	1	0	0
29.88	1	1	1	1	0	1			29.88	0	0	1	1	0	0
29.89	0	1	0	0	0	1			29.89	1	0	0	1	0	0
29.91	1	0	0	1	0	0			29.91	1	0	0	1	0	0
29.93	1	0	0	1	0	1			29.93	1	0	0	1	0	0
29.94	1	0	1	0	0	1			29.94	0	0	0	1	0	0
[truncated: 27,974 more rows]
